# Supplementary material
Source: PubMed Central journal article supplement (PMC4159658)

Source: Bibo\_20130531\_RM\_MSC07626\_1\_3  
 Scannumber: 2788  
 Protein: HNRNPA2B1; HNRPA2B1; HNRNPA2B1; HNRPA2B1; HNRNPA2B1; P22626-1; P22626; P22626-2; P22626; B8ZZ37  
 Peptide Score: 121.73  
 Method: FTMS; HCD; 1

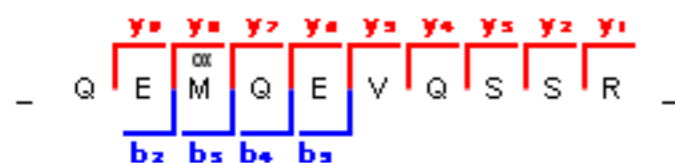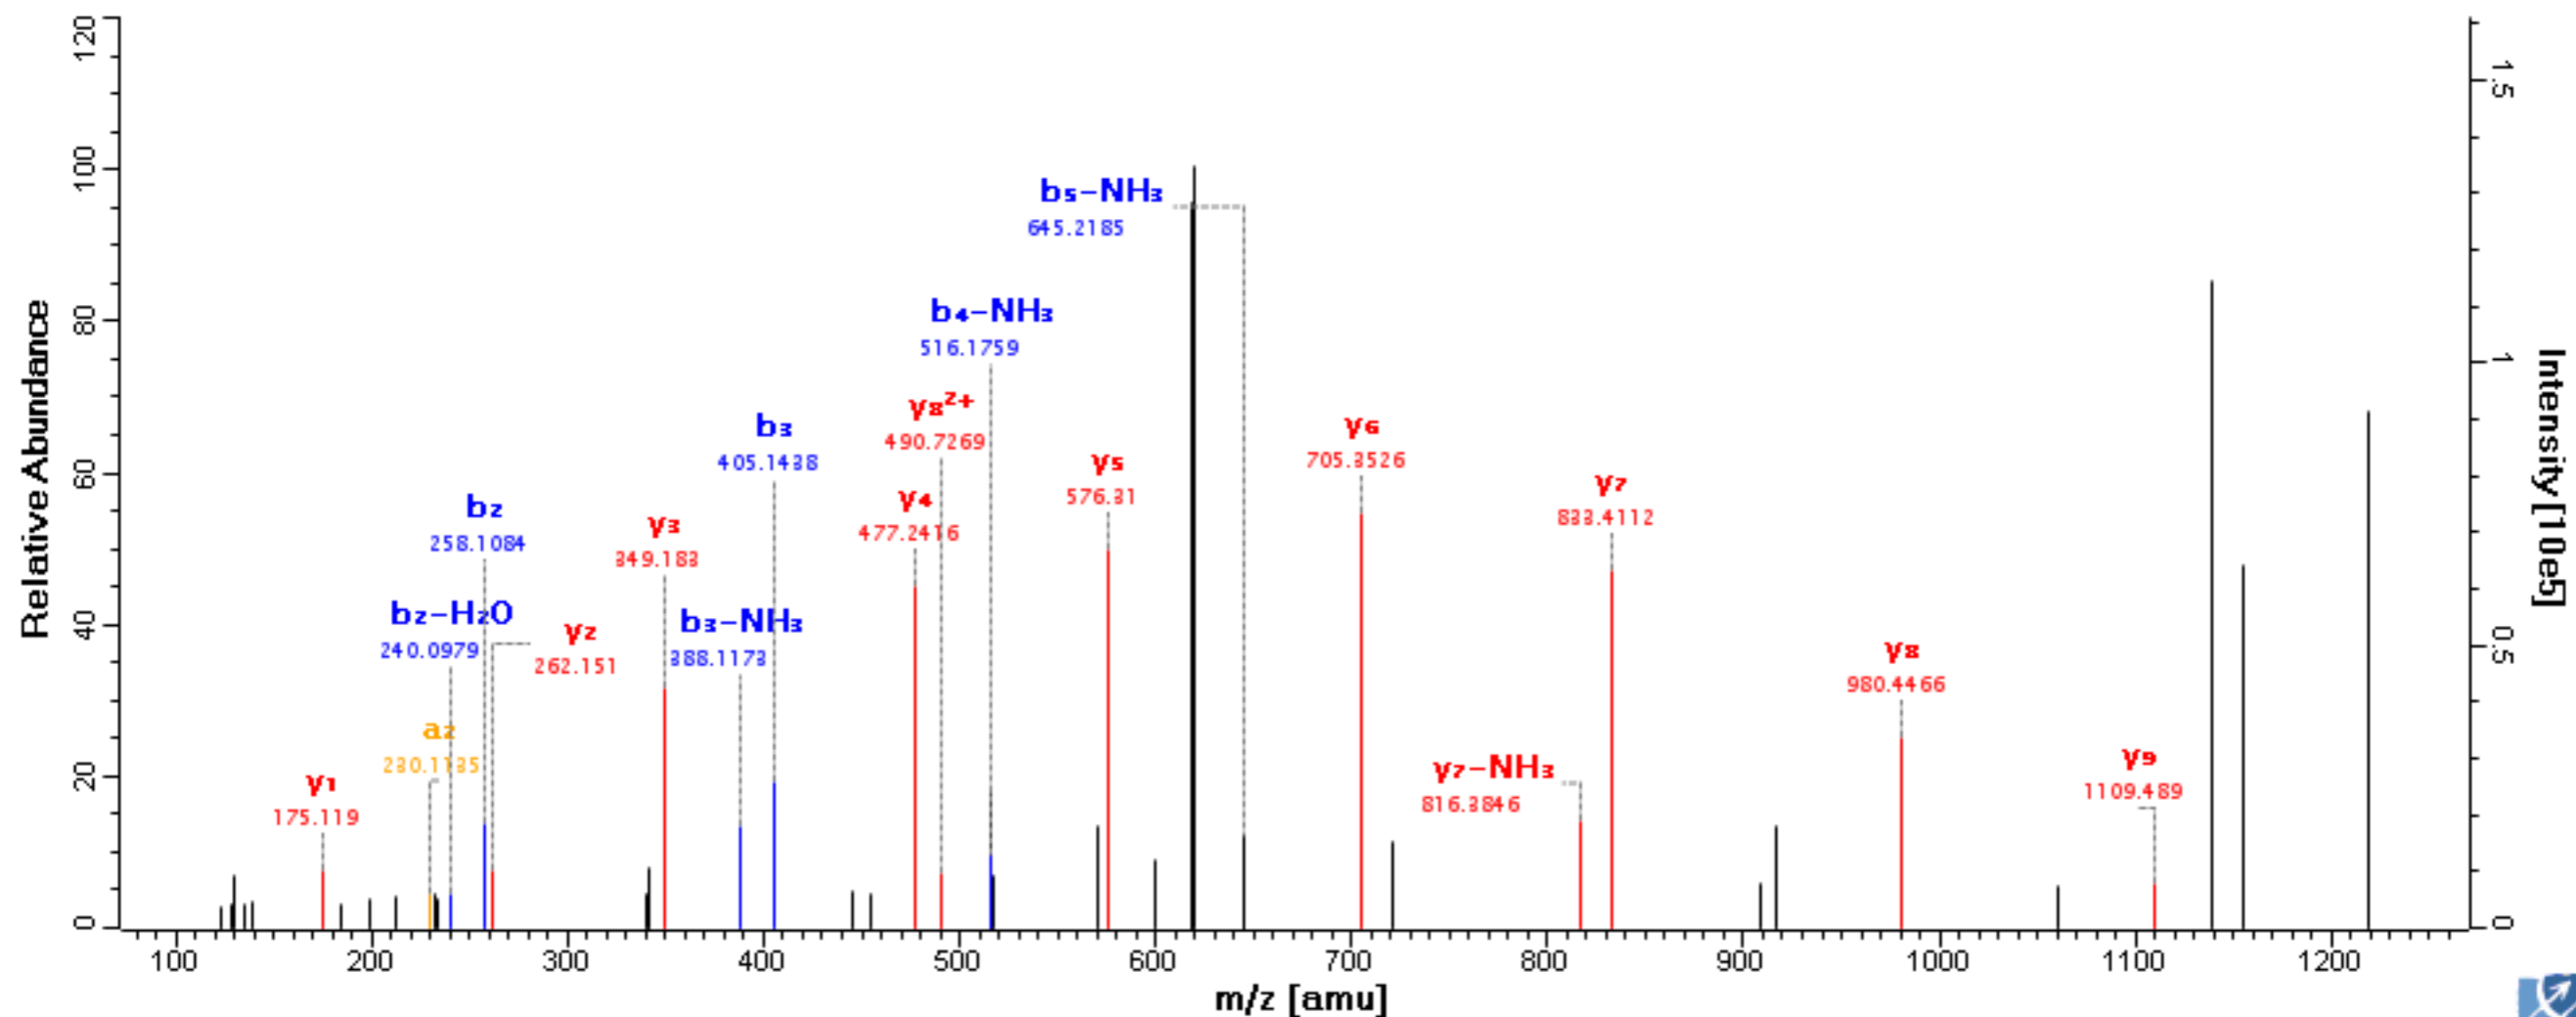

Source: Bibo\_20130531\_RM\_MSC07626\_1\_3  
 Scannumber: 3496  
 Protein: COL1A1; hCG\_29609; P02452; D3DTX7; Q14042; Q6LAN8; Q9UMA6; B7Z4S2  
 Peptide Score: 133.55  
 Method: FTMS; HCD; 1

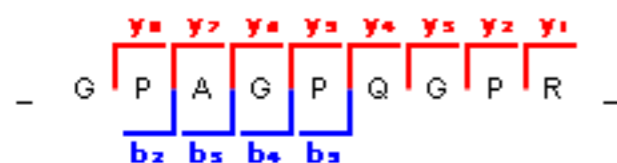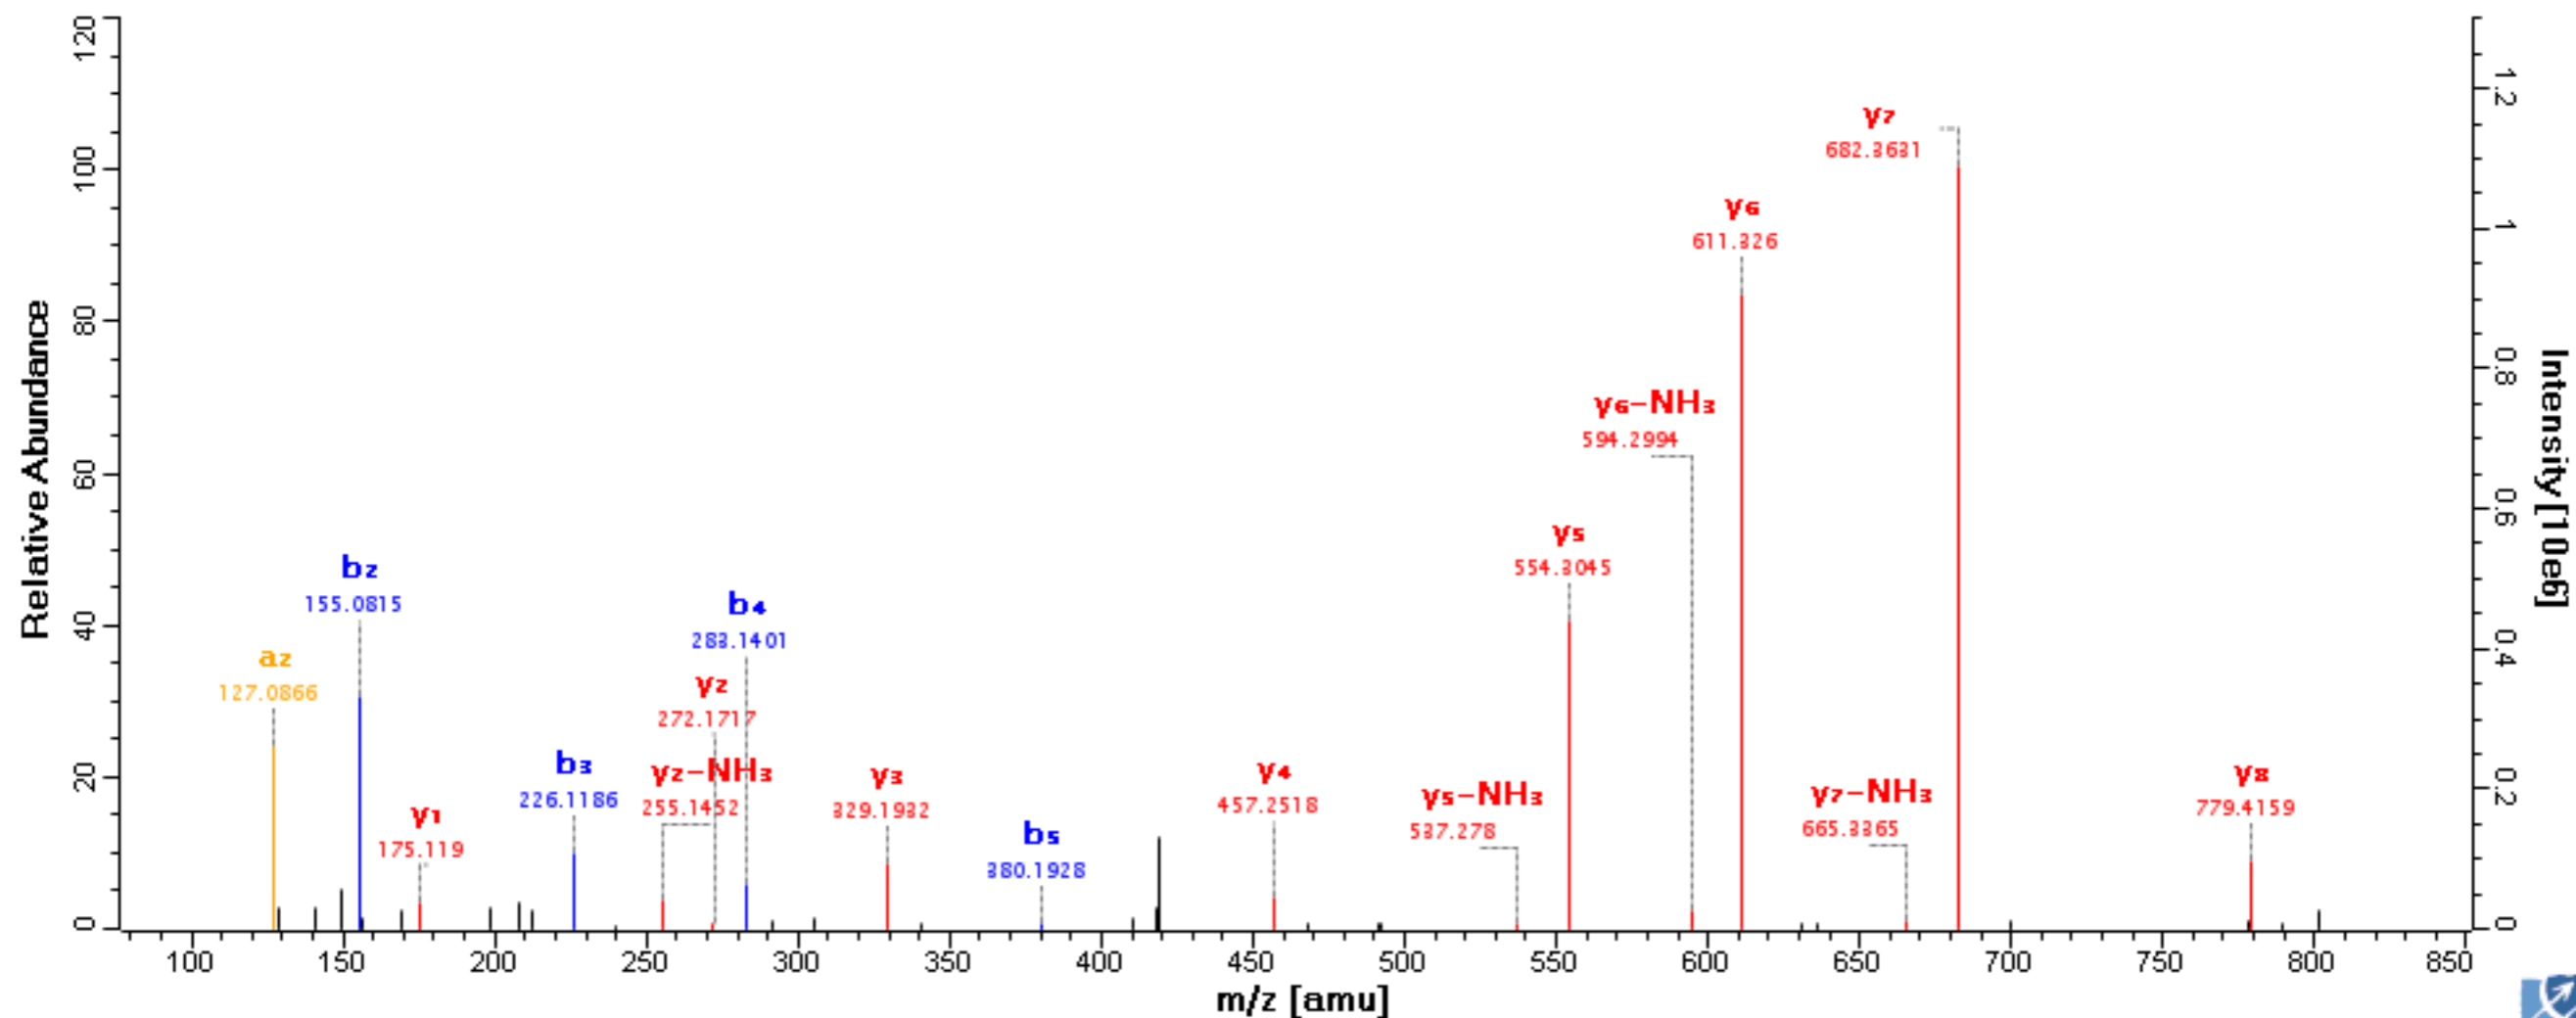

Source: Bibo\_20130531\_RM\_MSC07626\_1\_3

Scannumber: 13680

Protein: KIAA1835; RANGAP1; SD; RANGAP1; RP4-756G23.7-007; RANGAP1; RP4-756G23.7-009; RANGAP1; RP4-756G23.7-008; P46060; BOQYT3; B4DY16; B4E0U0; Q8WUS7; Q9BSK3; BOQYT4; E

Peptide Score: 123.8

Method: FTMS; HCD; 1

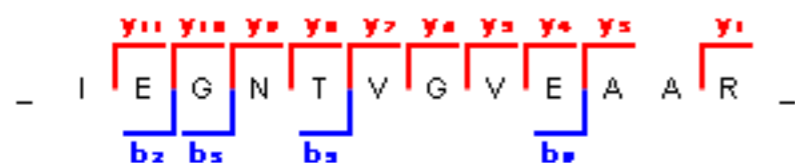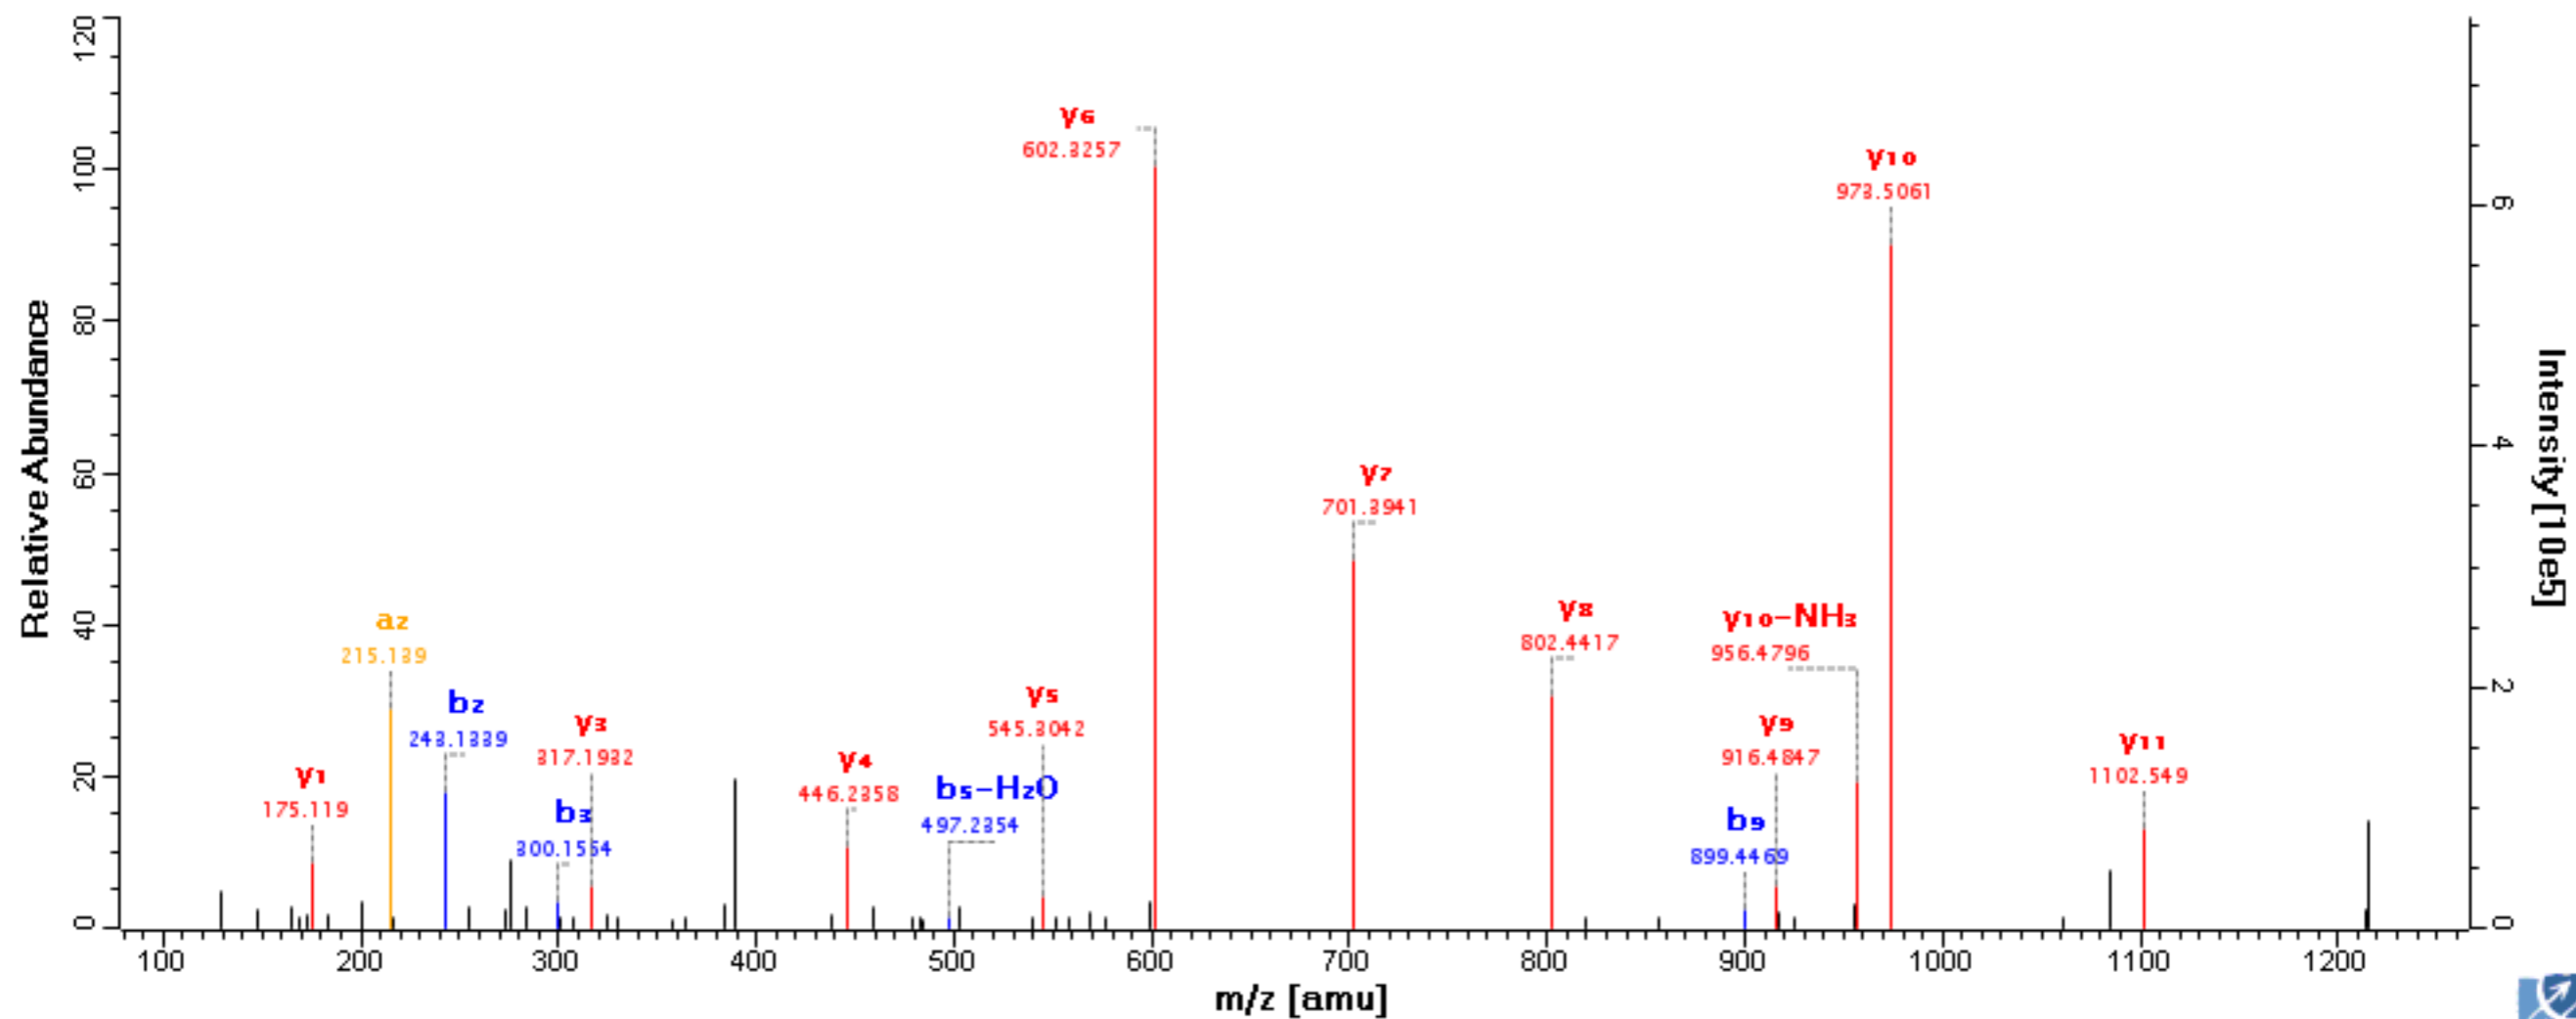

Source: Bibo\_20130531\_RM\_MSC07626\_1\_3

Scannumber: 16439

Protein: EPN1; EPN3; EPN1; EPN3; Q9Y6I3-1; Q9Y6I3; Q9H201-1; Q9H201; B4DUG9; Q9Y6I3-2; Q9Y6I3; Q9Y6I3-3; Q9Y6I3; D6REL6; Q9H201-2; Q9H201; D6RFG3; D6RBR6; D6RBI9; D6R907

Peptide Score: 140.31

Method: FTMS; HCD; 1

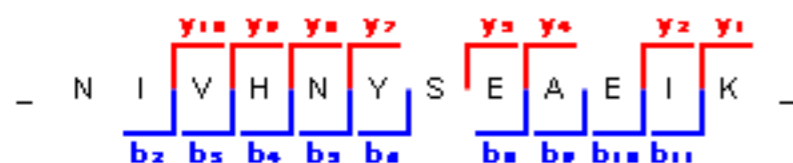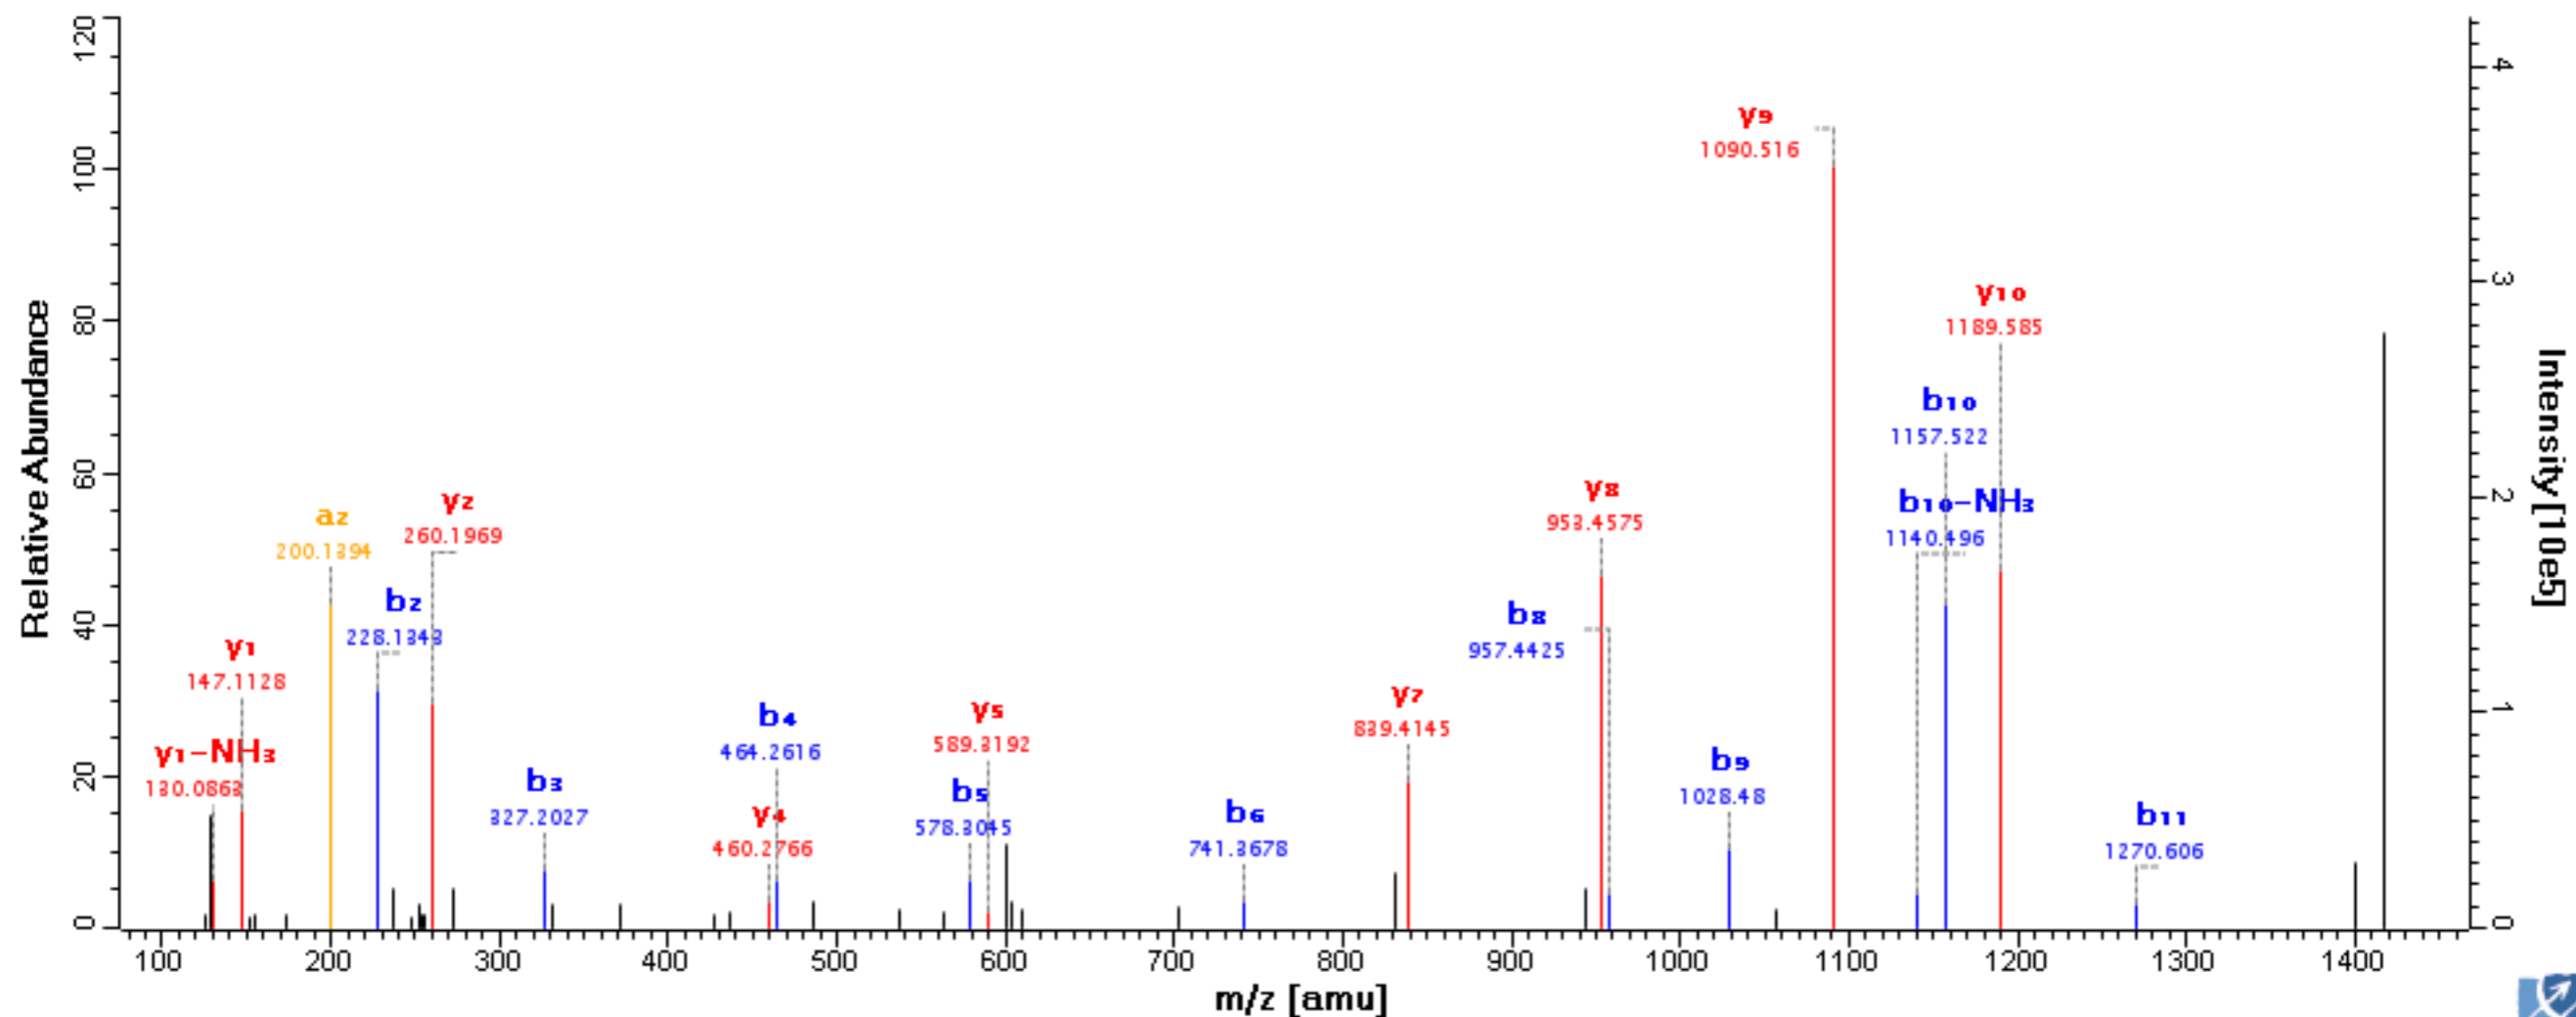

Source: Bibo\_20130531\_RM\_MSC07626\_1\_3  
 Scannumber: 16903  
 Protein: E5RG04  
 Peptide Score: 88.19  
 Method: FTMS; HCD; 1

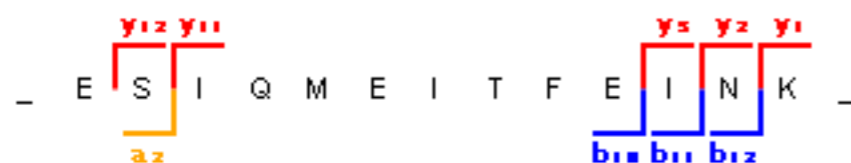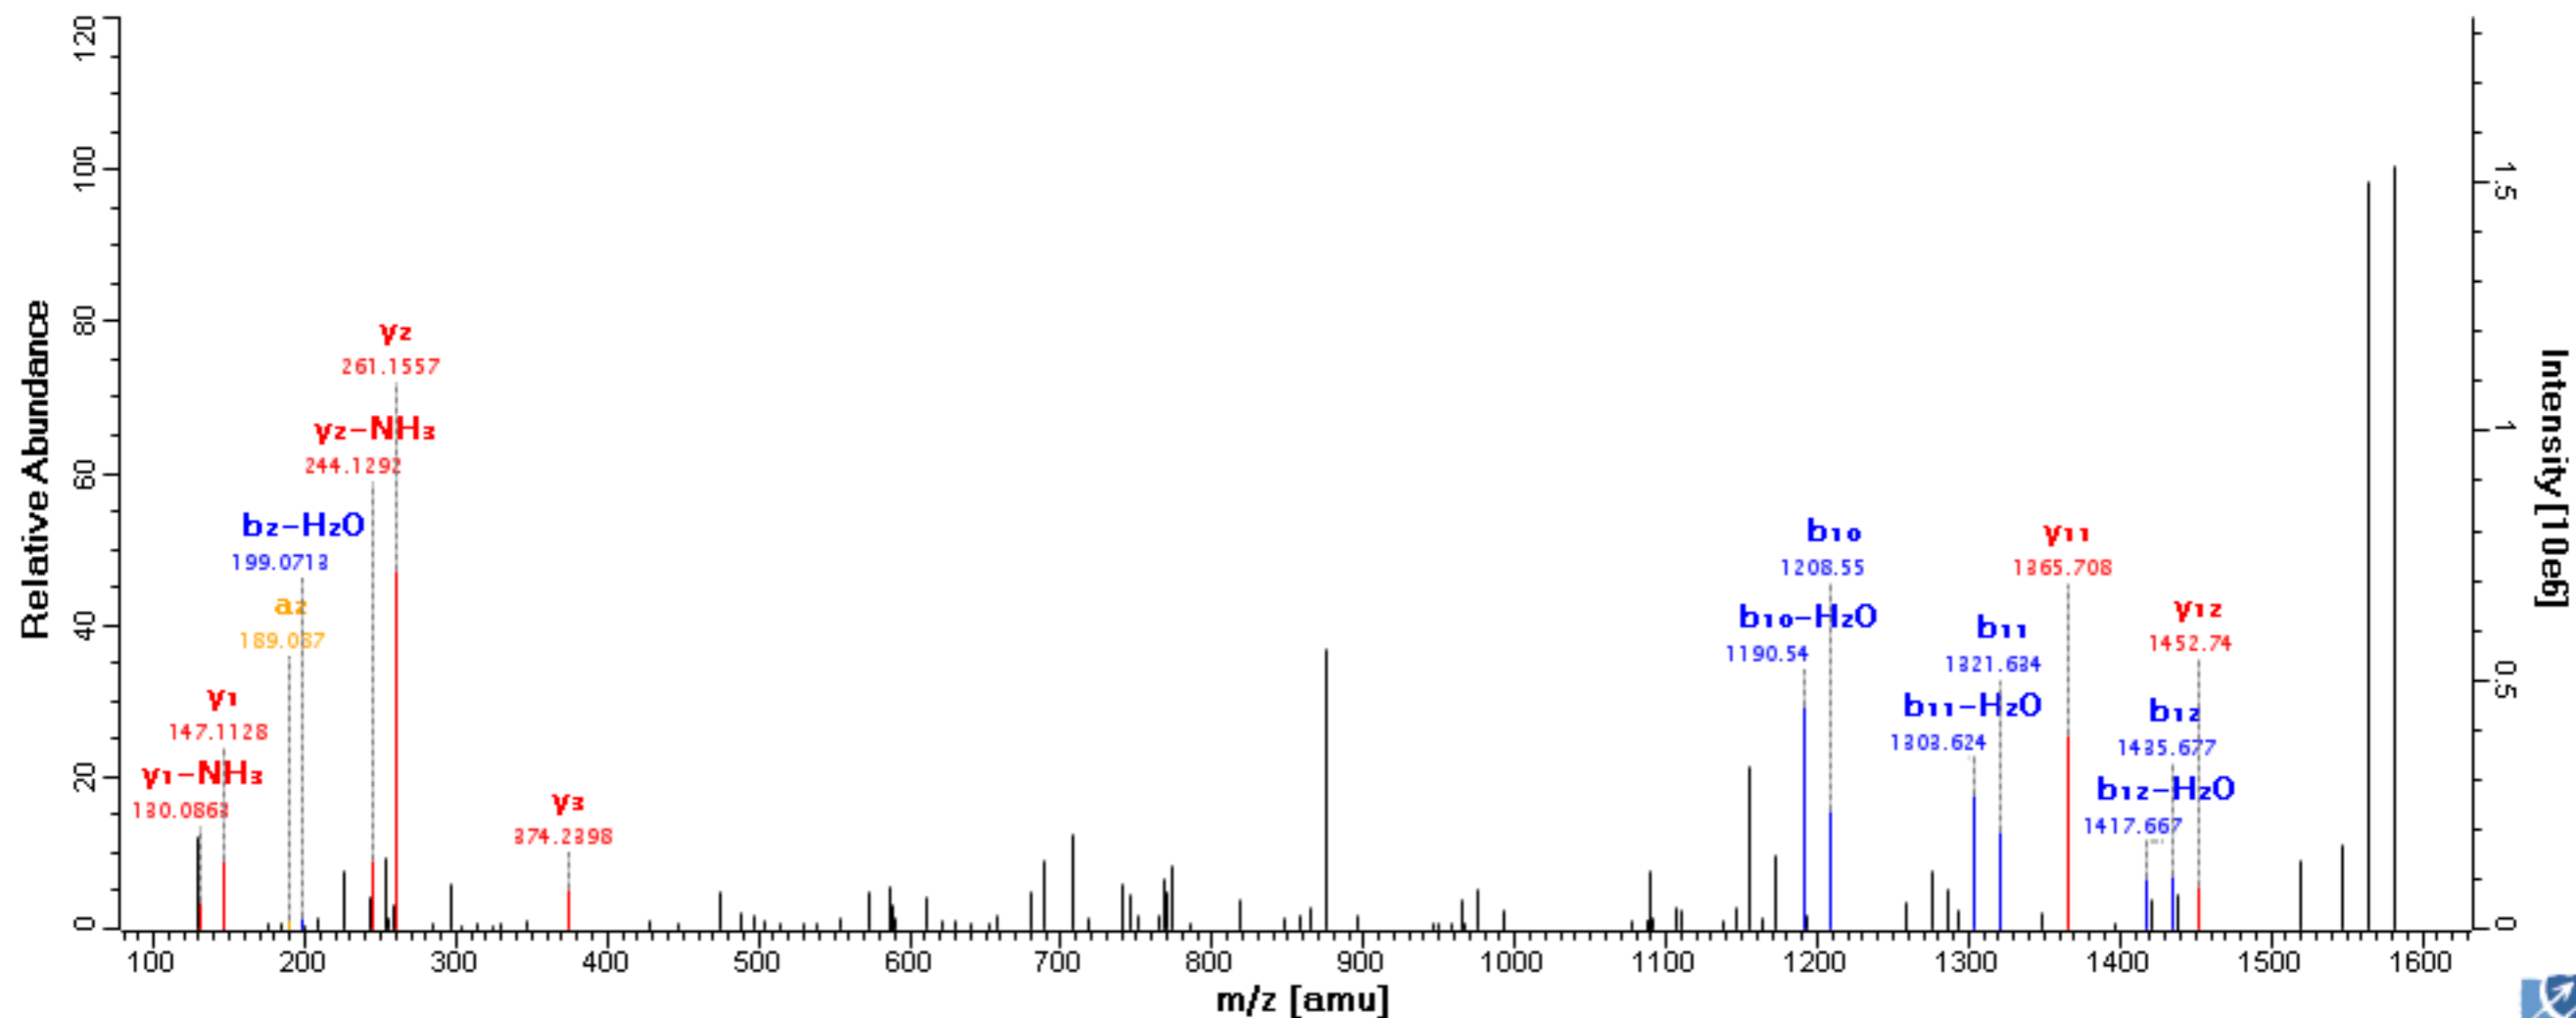

Source: Bibo\_20130531\_RM\_MSC07626\_1\_3  
 Scannumber: 17048  
 Protein: CTTNBP2NL; KIAA1433; DKFZp547A023; CTTNBP2NL; RP4-671 G15.1-002; Q9P2B4; B3KM55; Q9NPX3; B1AMN7  
 Peptide Score: 97.46  
 Method: FTMS; HCD; 1

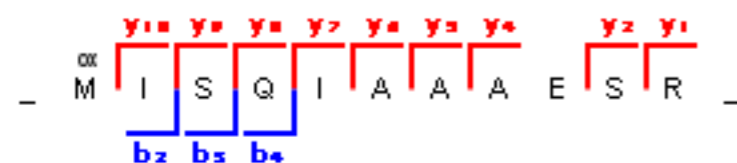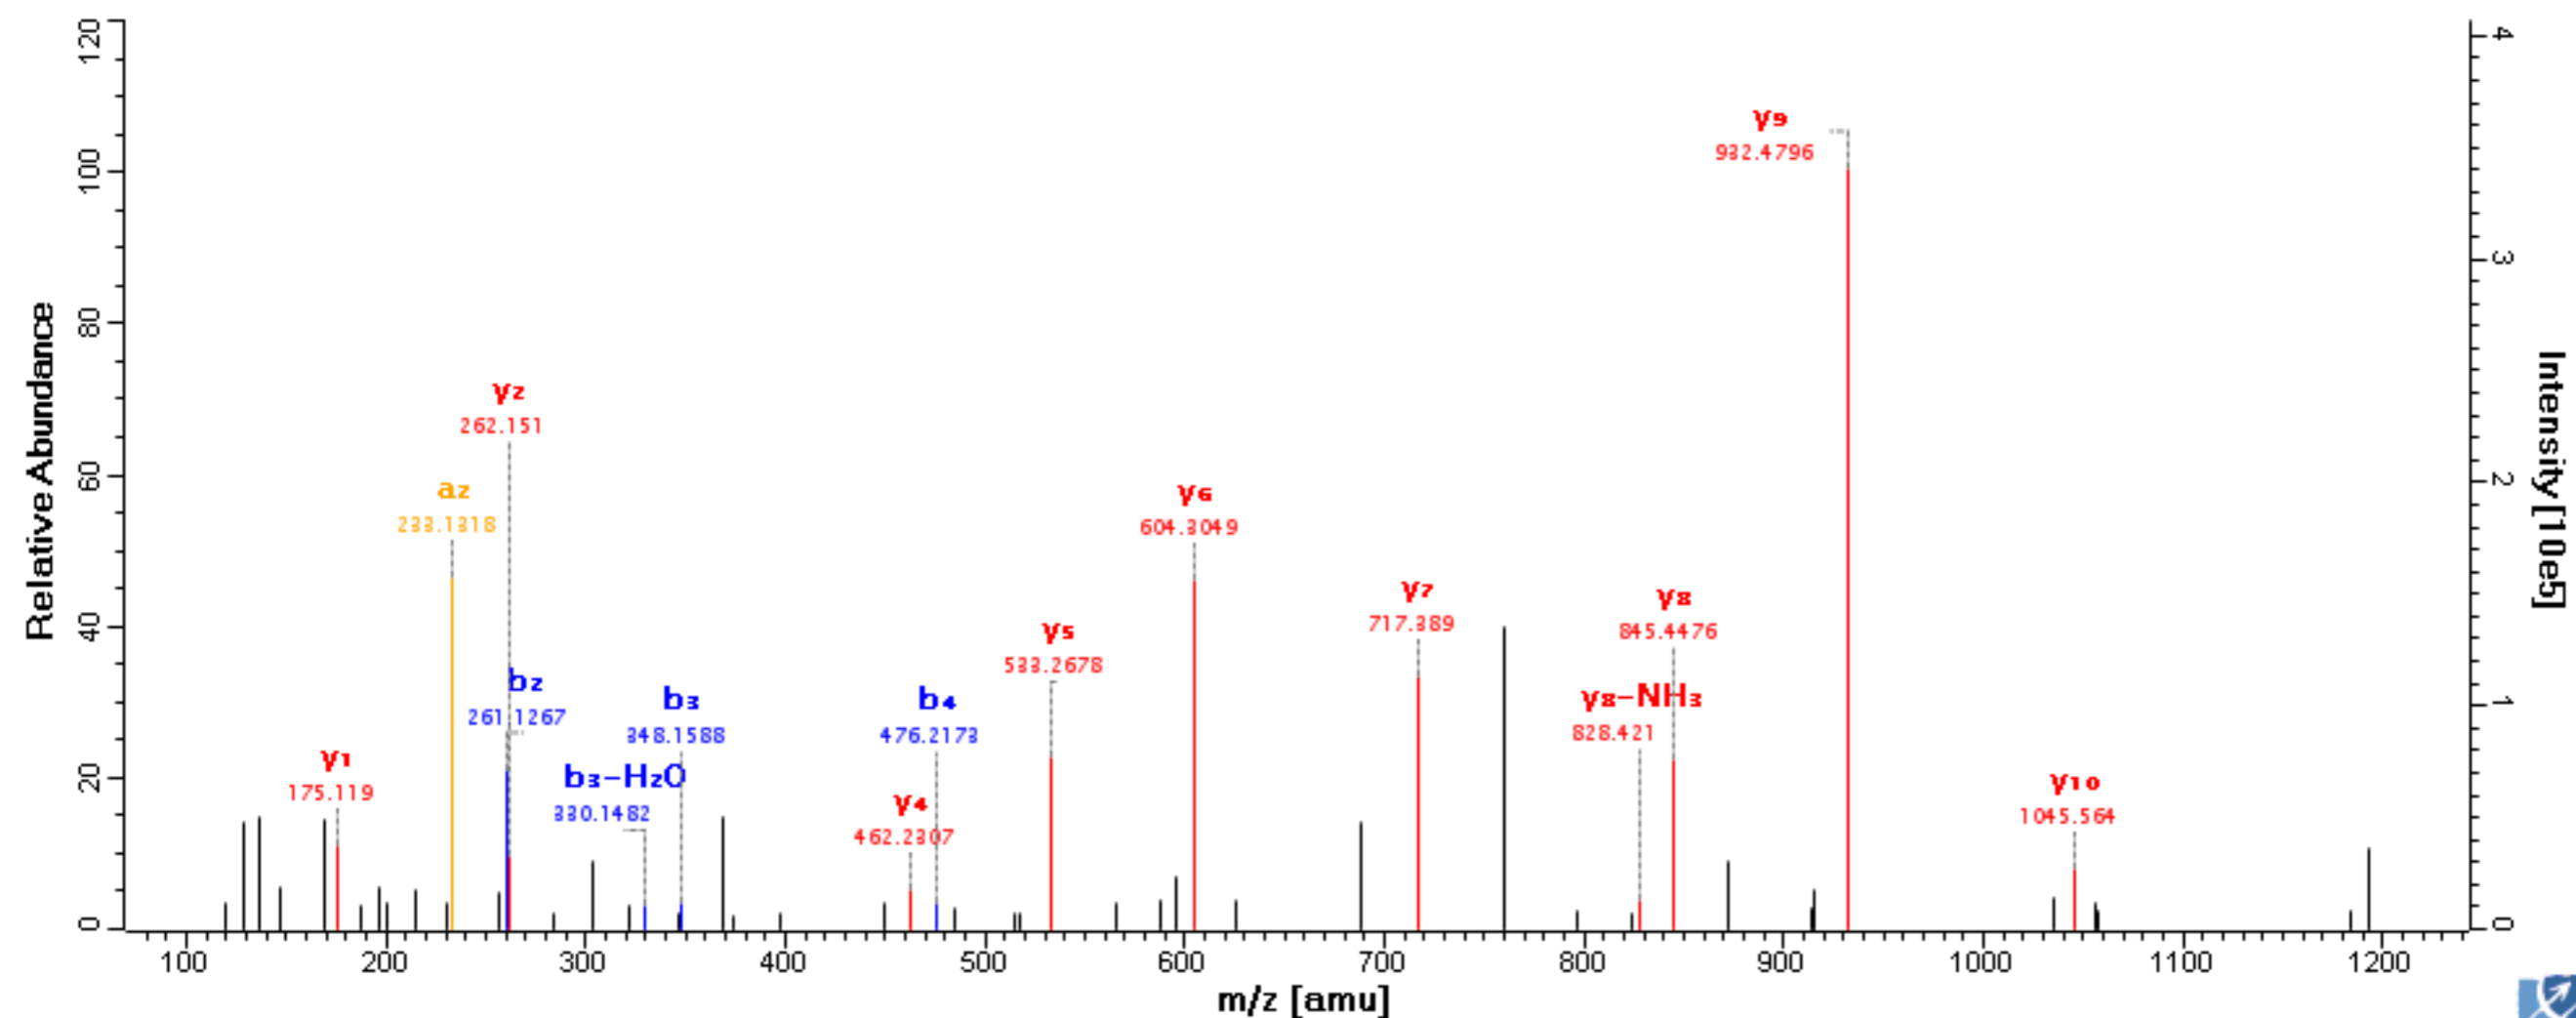

Source: Bibo\_20130531\_RM\_MSC07626\_1\_3  
 Scannumber: 17527  
 Protein: GNB2L1; HLC7; PIG21; D6REE5; P63244; E9KL35; D6R9L0; D6RAC2; D6R9Z1; D6RHH4; D6RDF4; B4DVD2; D6RFZ9; D6RFX4; B4DWC6; D6RBD0; B4E0C3; E9PD14; D6RAU2; D6R909; D6RGK  
 Peptide Score: 102.61  
 Method: FTMS; HCD; 1

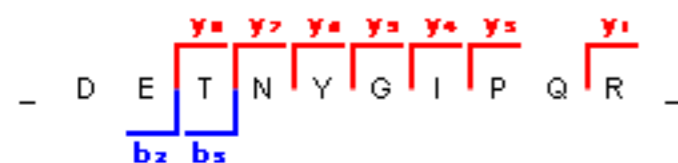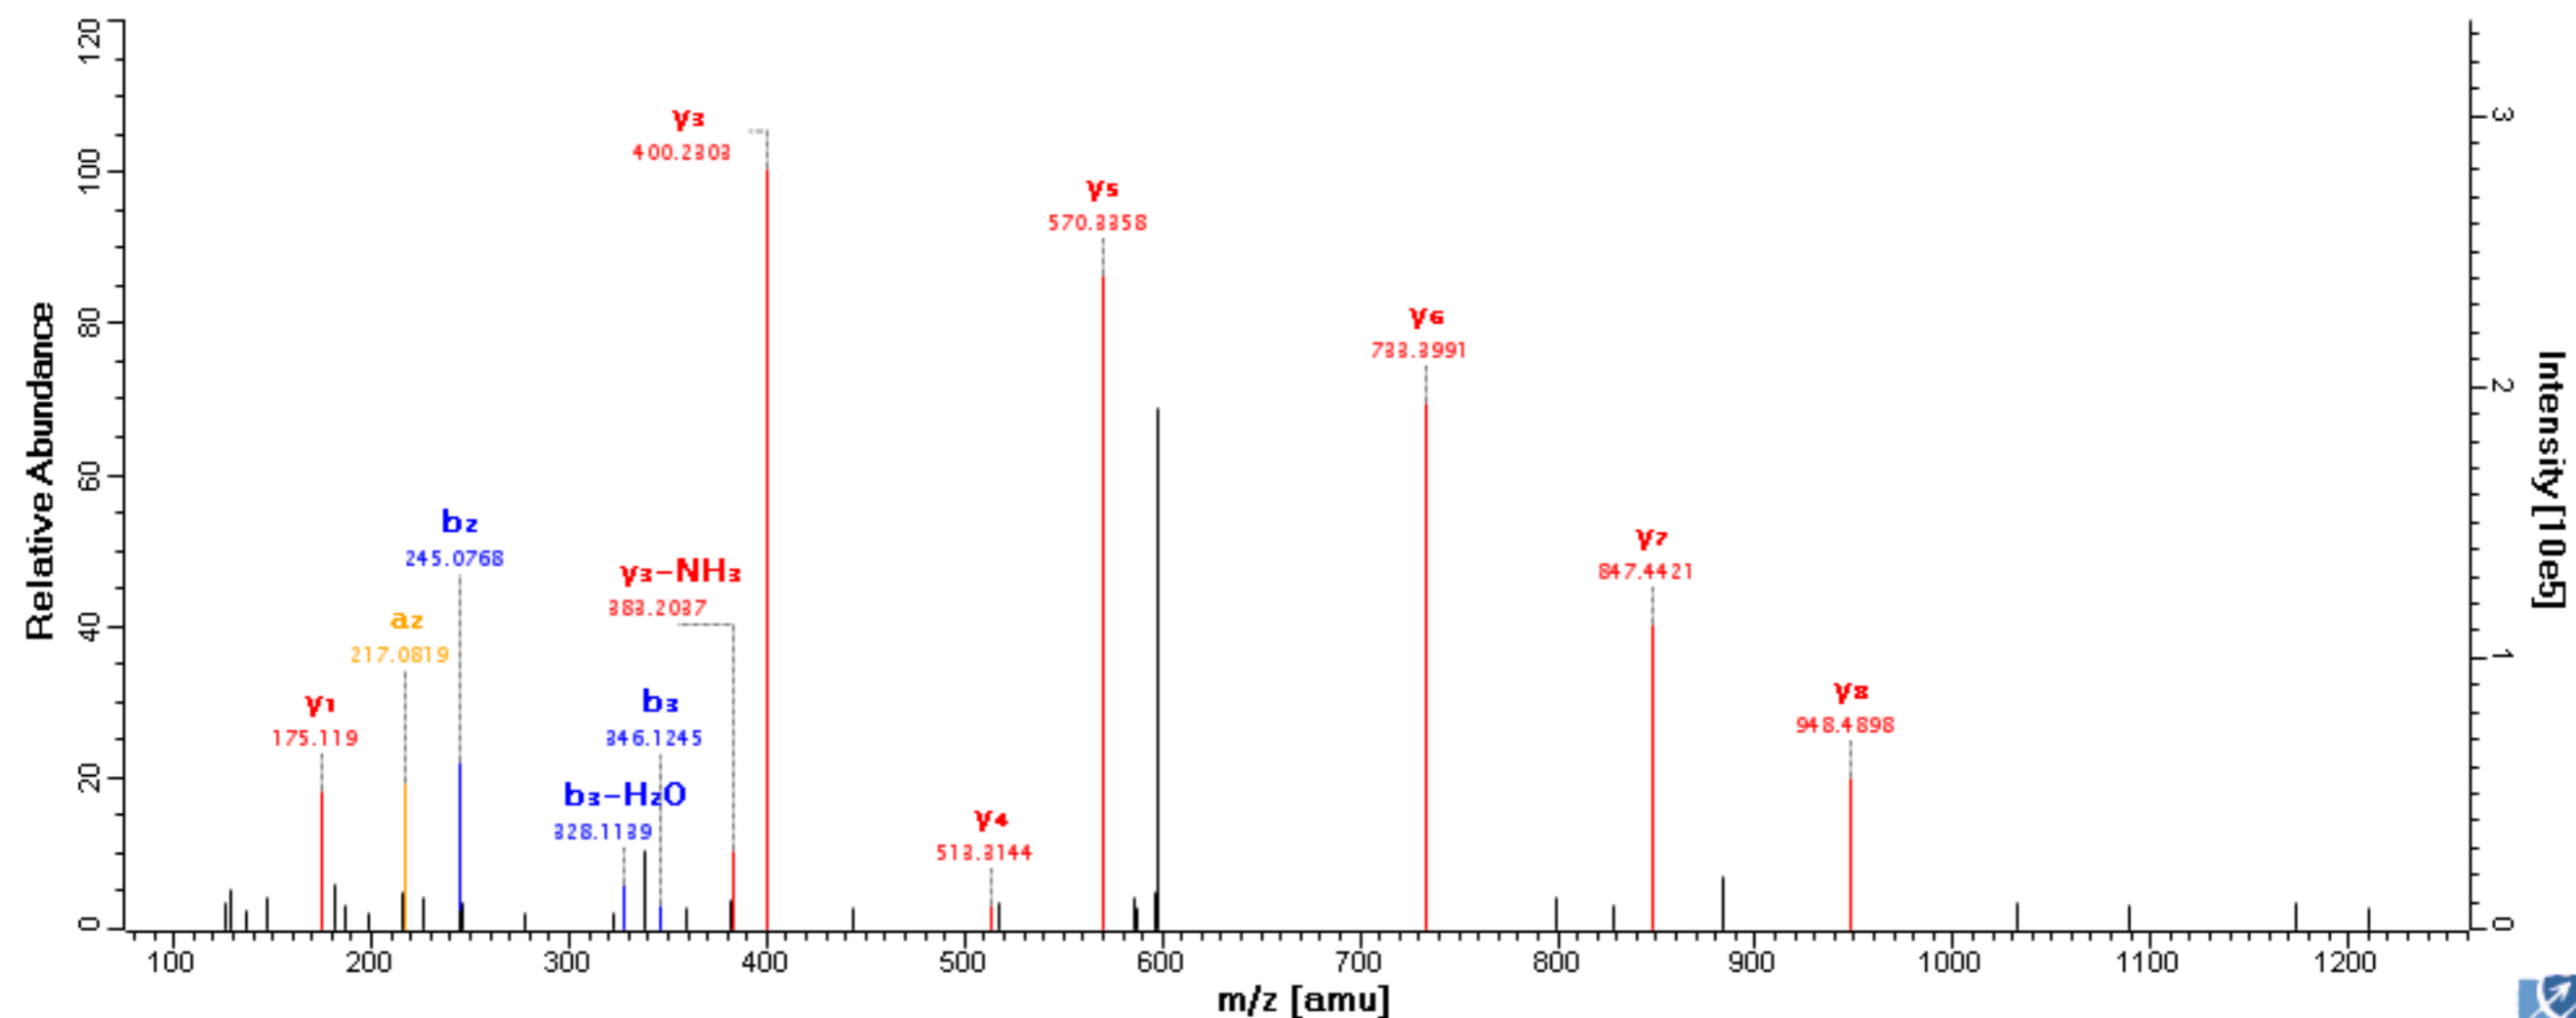

Source: Bibo\_20130531\_RM\_MSC07626\_1\_3  
 Scannumber: 21453  
 Protein: EPN2; KIAA1065; EPN2; KIAA1065; hCG\_1811979; EPN2; KIAA1065; EPN2; O95208-1; O95208; B3KMB3; O95208-2; O95208; B7ZKM5; E9PBC2; Q52LD0; O95208-3; O95208; E7EMC3; B7  
 Peptide Score: 81.31  
 Method: FTMS; HCD; 1

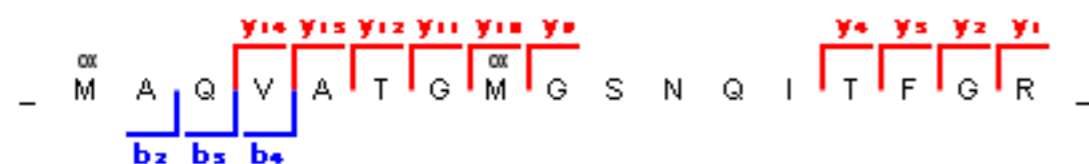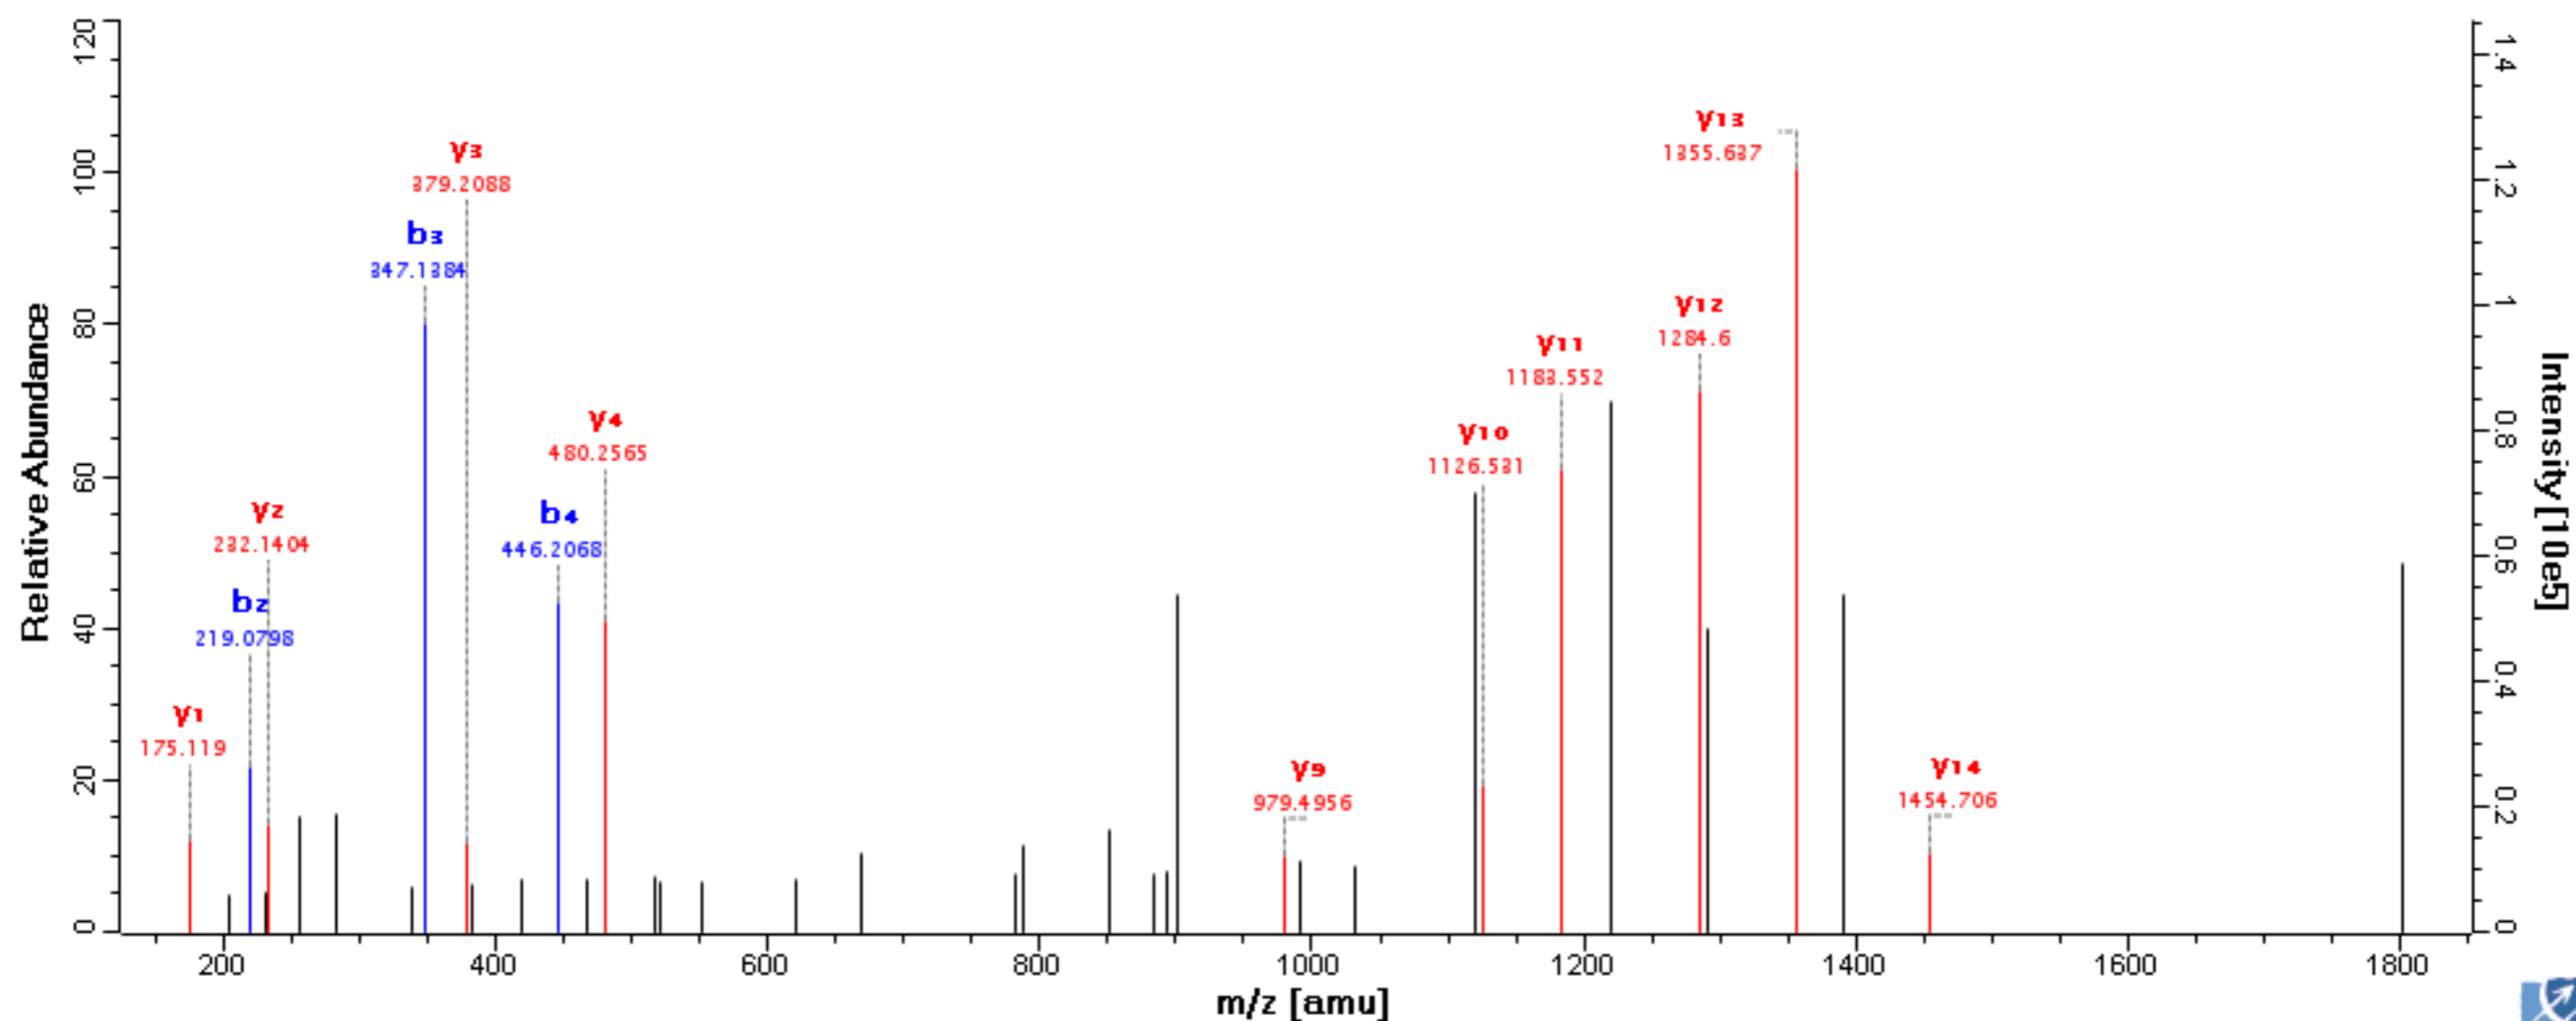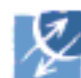

Source: Bibo\_20130531\_RM\_MSC07626\_1\_3  
 Scannumber: 22122  
 Protein: COPB; COPB1; MSTP026; P53618  
 Peptide Score: 66.3  
 Method: FTMS; HCD; 1

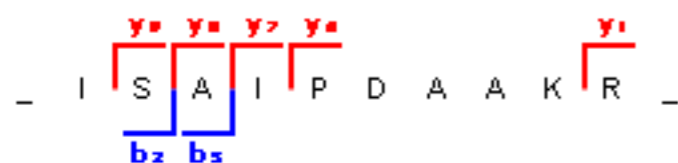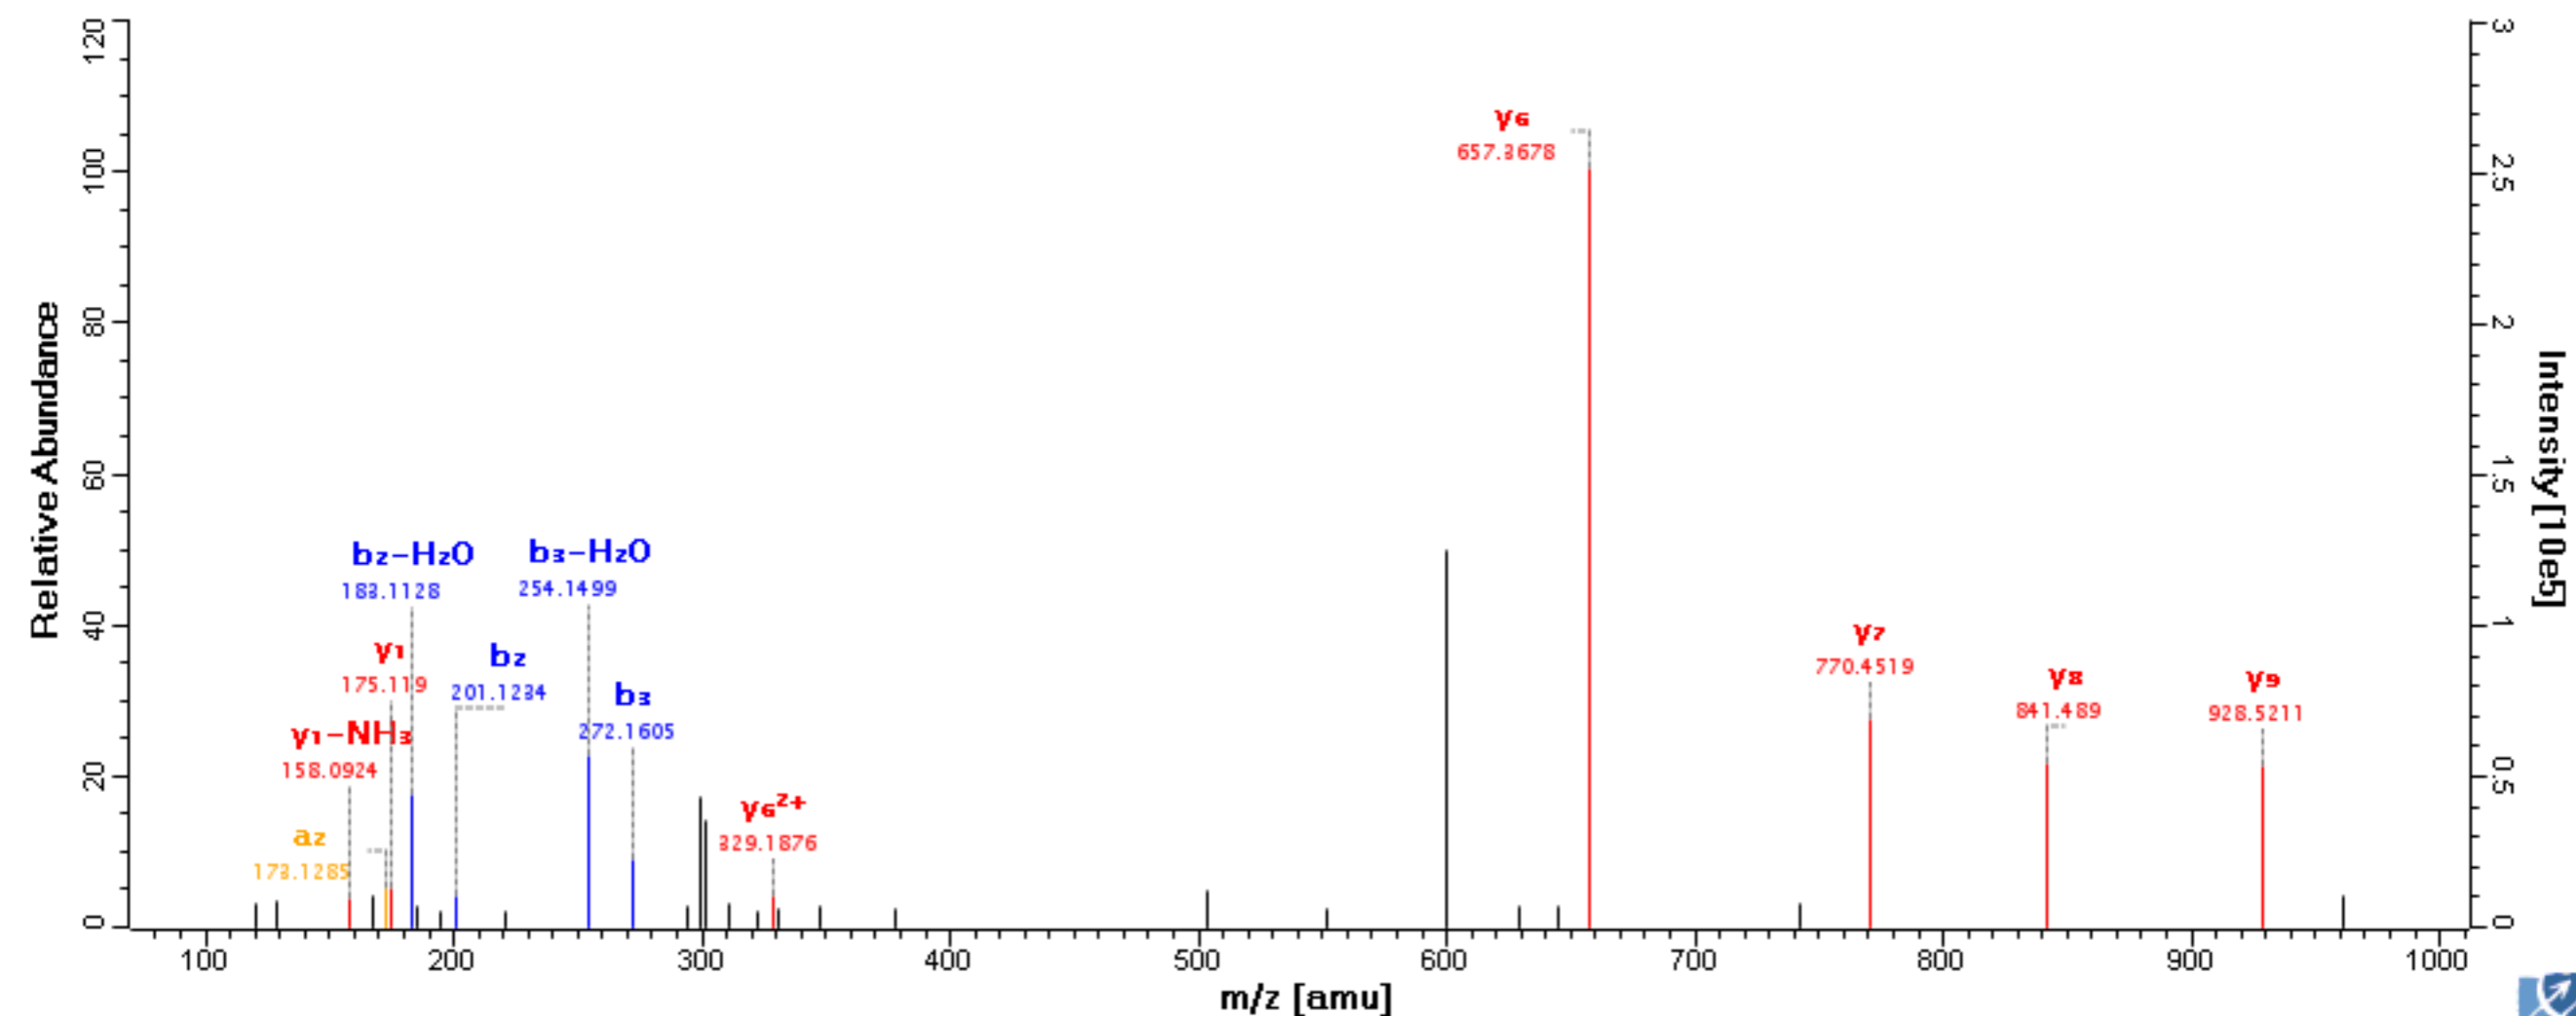

Source: Bibo\_20130531\_RM\_MSC07626\_1\_3  
 Scannumber: 22374  
 Protein: COPB; COPB1; MSTP026; P53618  
 Peptide Score: 97.43  
 Method: FTMS; HCD; 1

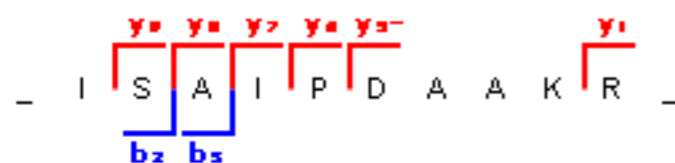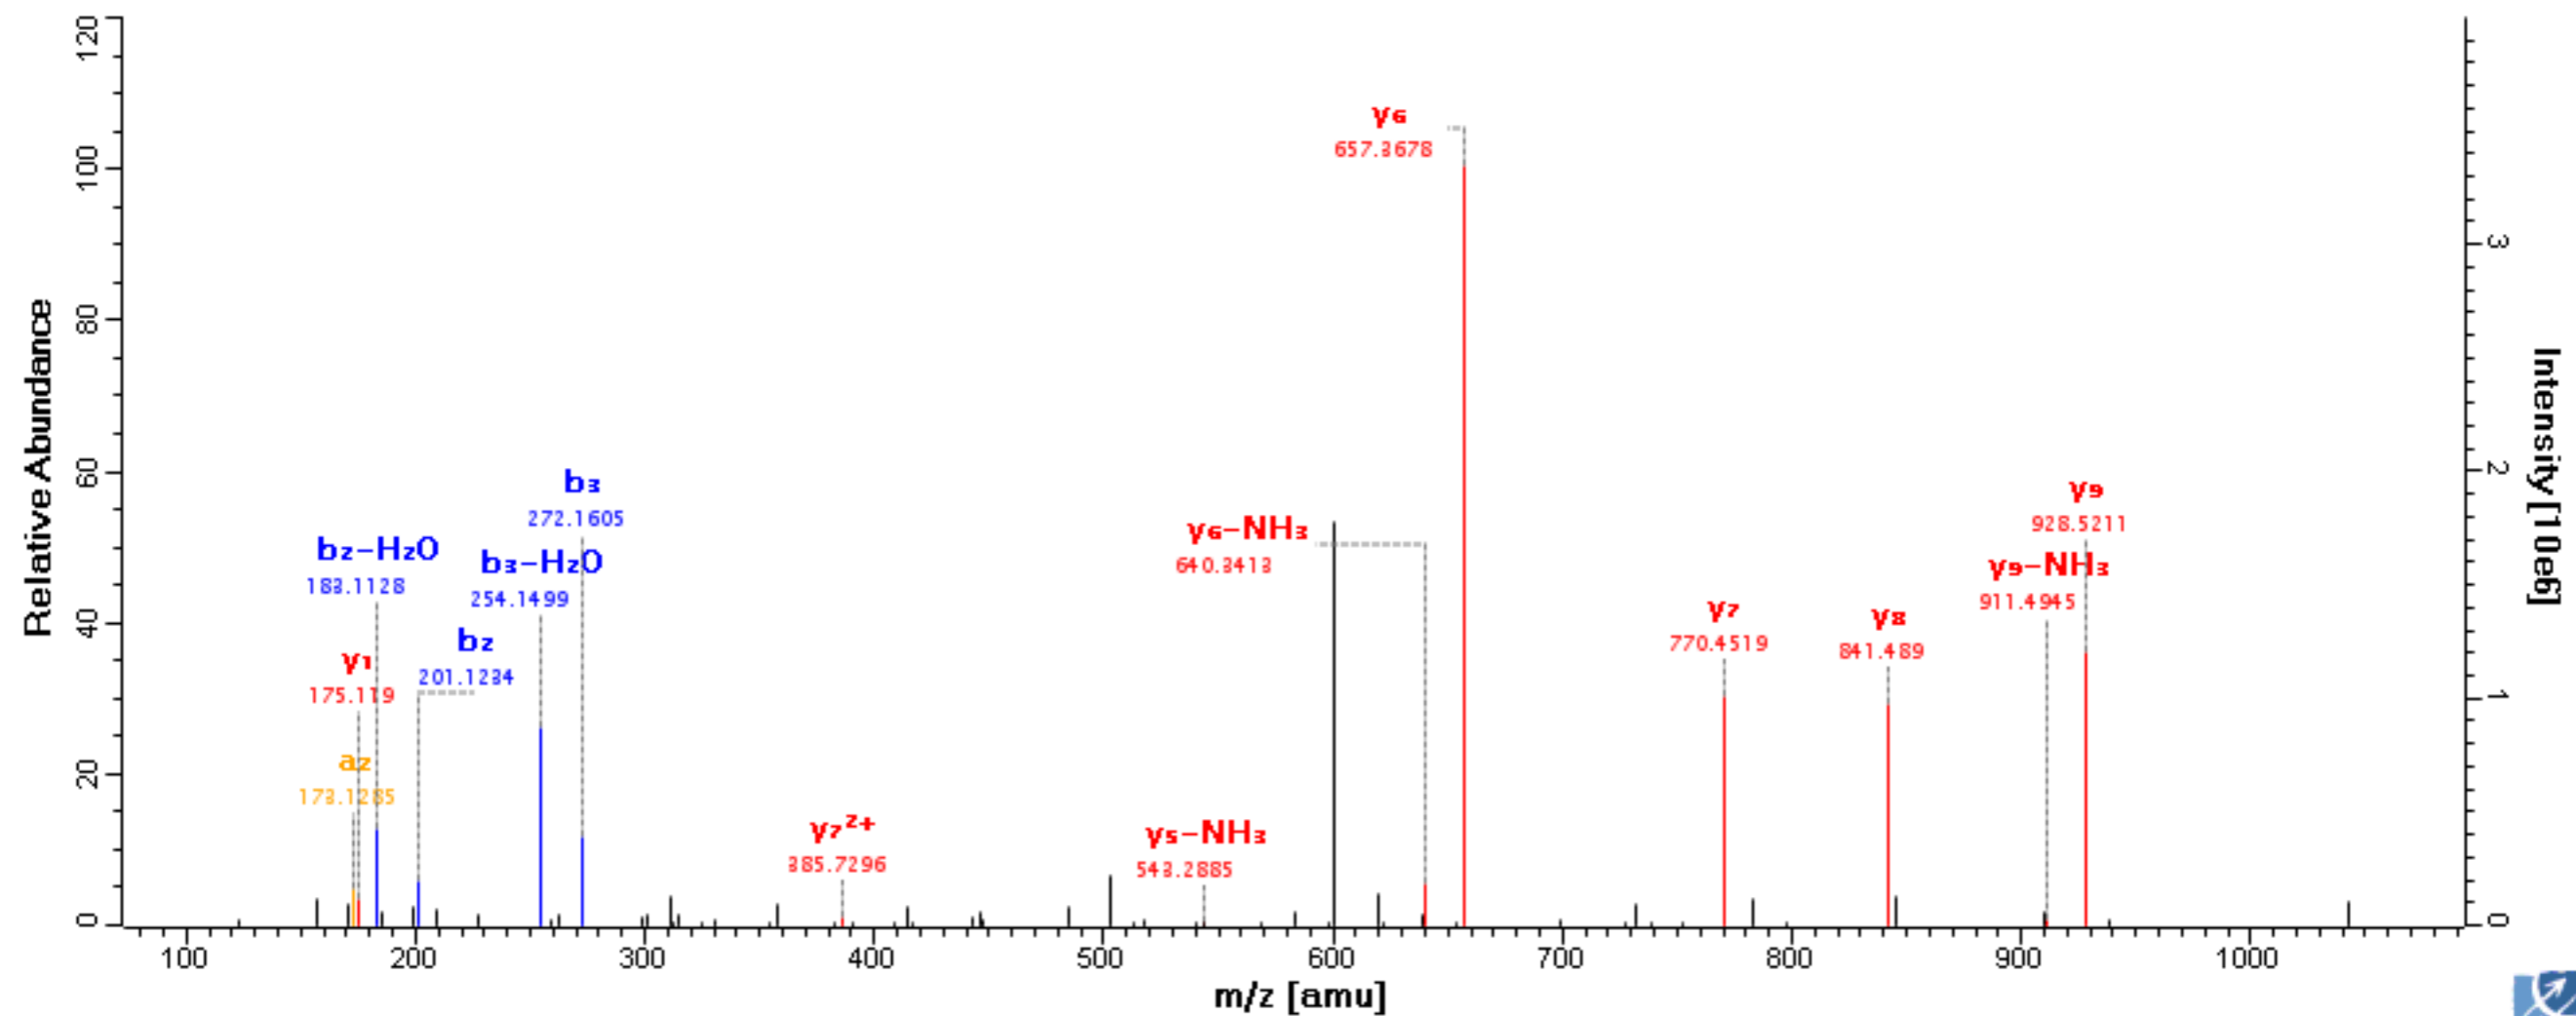

Source: Bibo\_20130531\_RM\_MSC07626\_1\_3  
 Scannumber: 23052  
 Protein: BAM; BMH; CSPG6; SMC3; SMC3L1; Q9UQE7; B0AZQ4; Q86VX4  
 Peptide Score: 130.96  
 Method: FTMS; HCD; 1

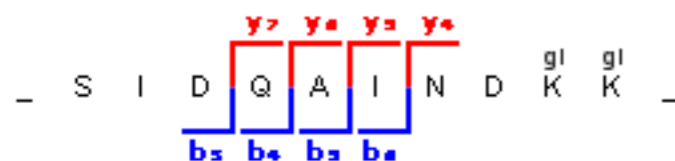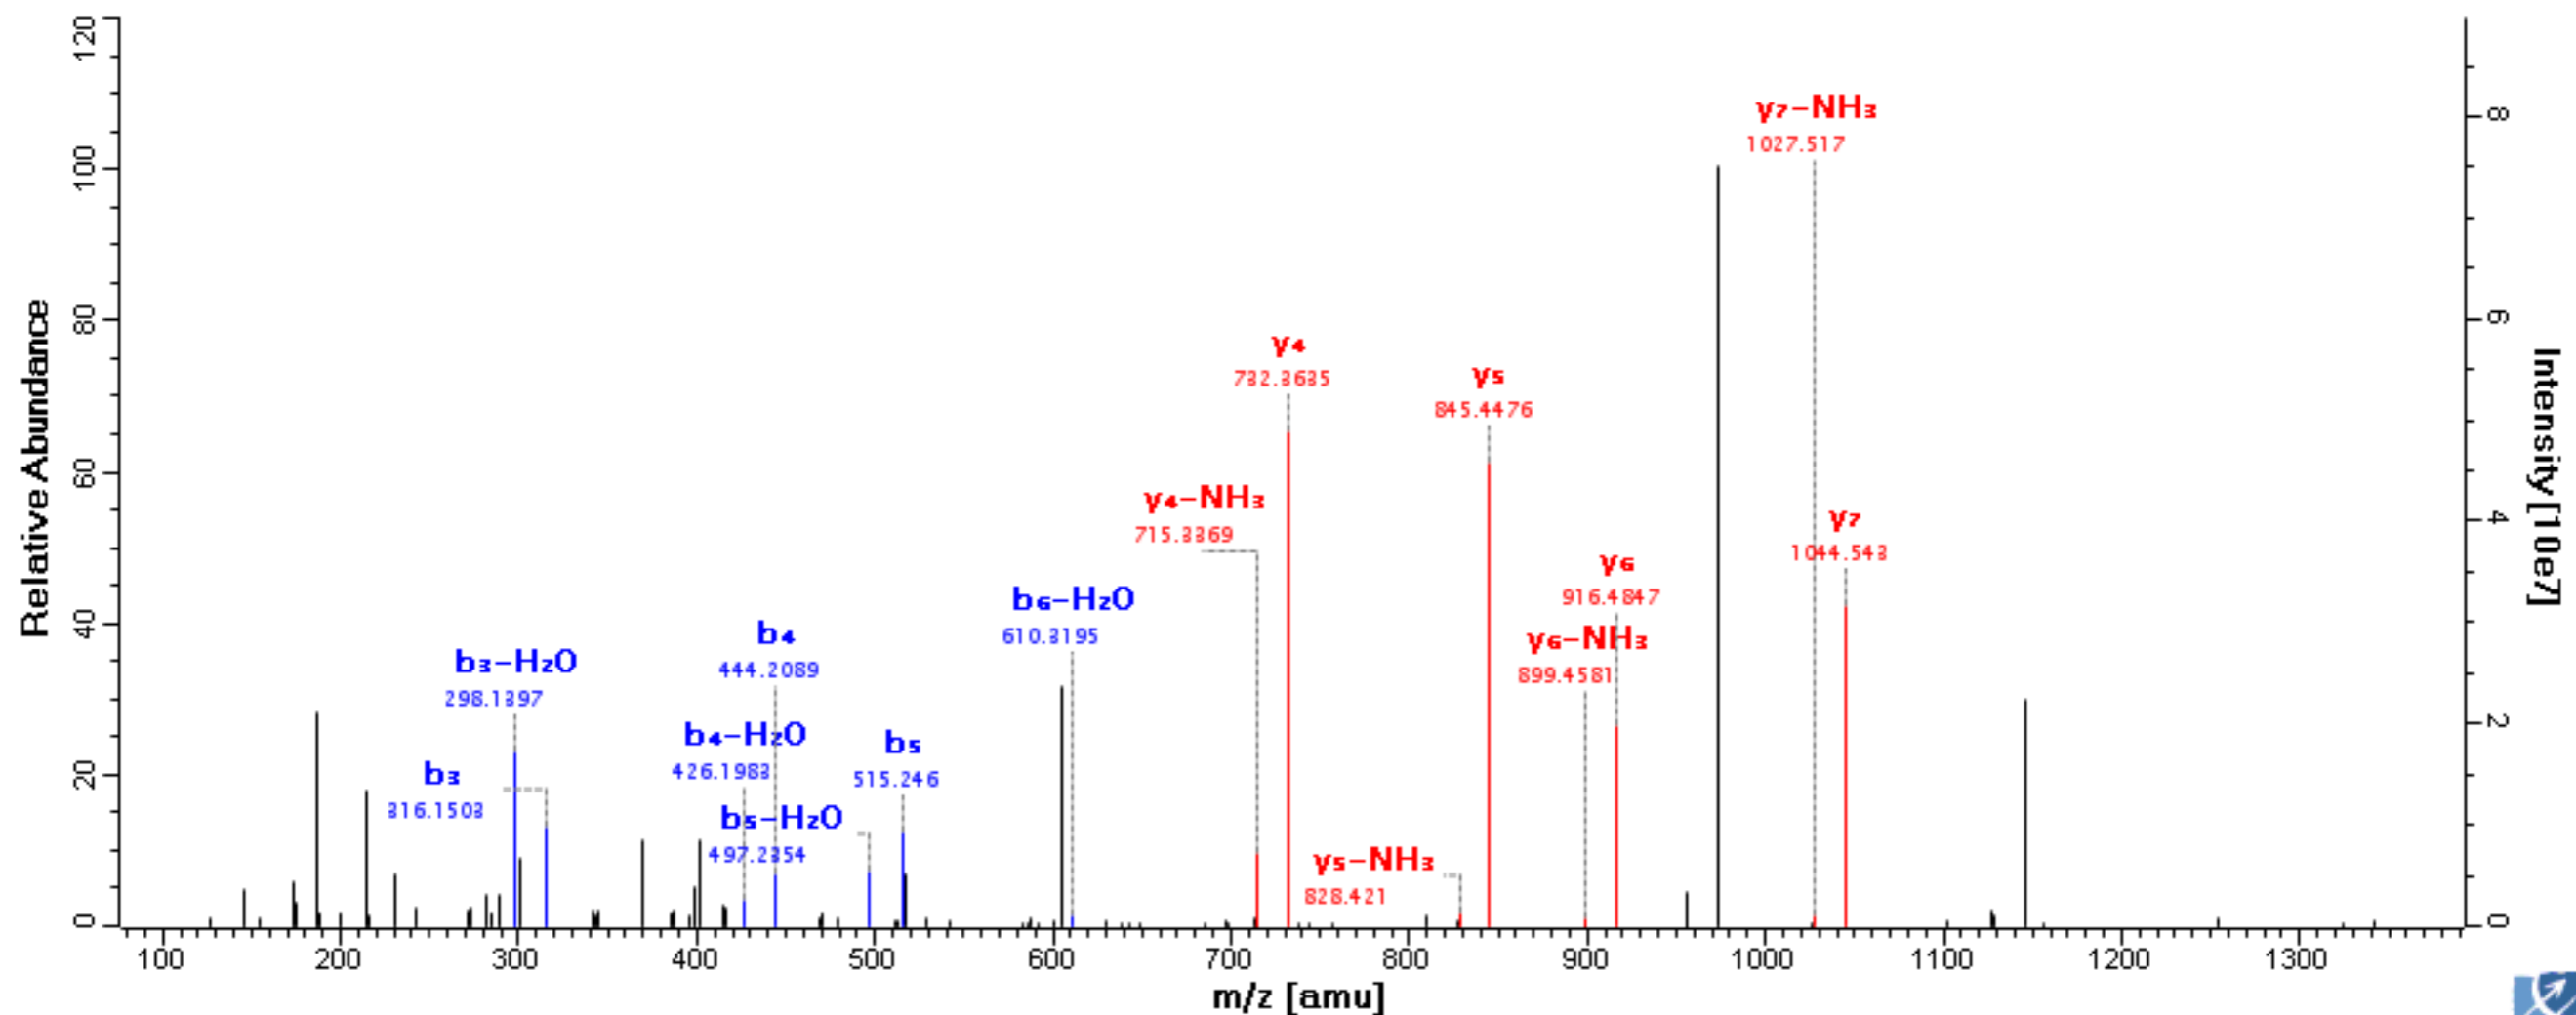

Source: Bibo\_20130531\_RM\_MSC07626\_1\_3  
 Scannumber: 24822  
 Protein: KIAA0886; MyO43; NOGO; RTN4; SP1507; Nbla10545; KIAA0886; MyO43; NOGO; RTN4; SP1507; KIAA0886; MyO43; NOGO; RTN4; SP1507; hCG\_1784307; RTN4; Q9NQC3-1; Q9NQC3; B4  
 Peptide Score: 110.84  
 Method: FTMS; HCD; 1

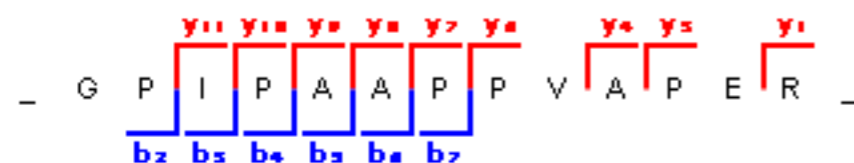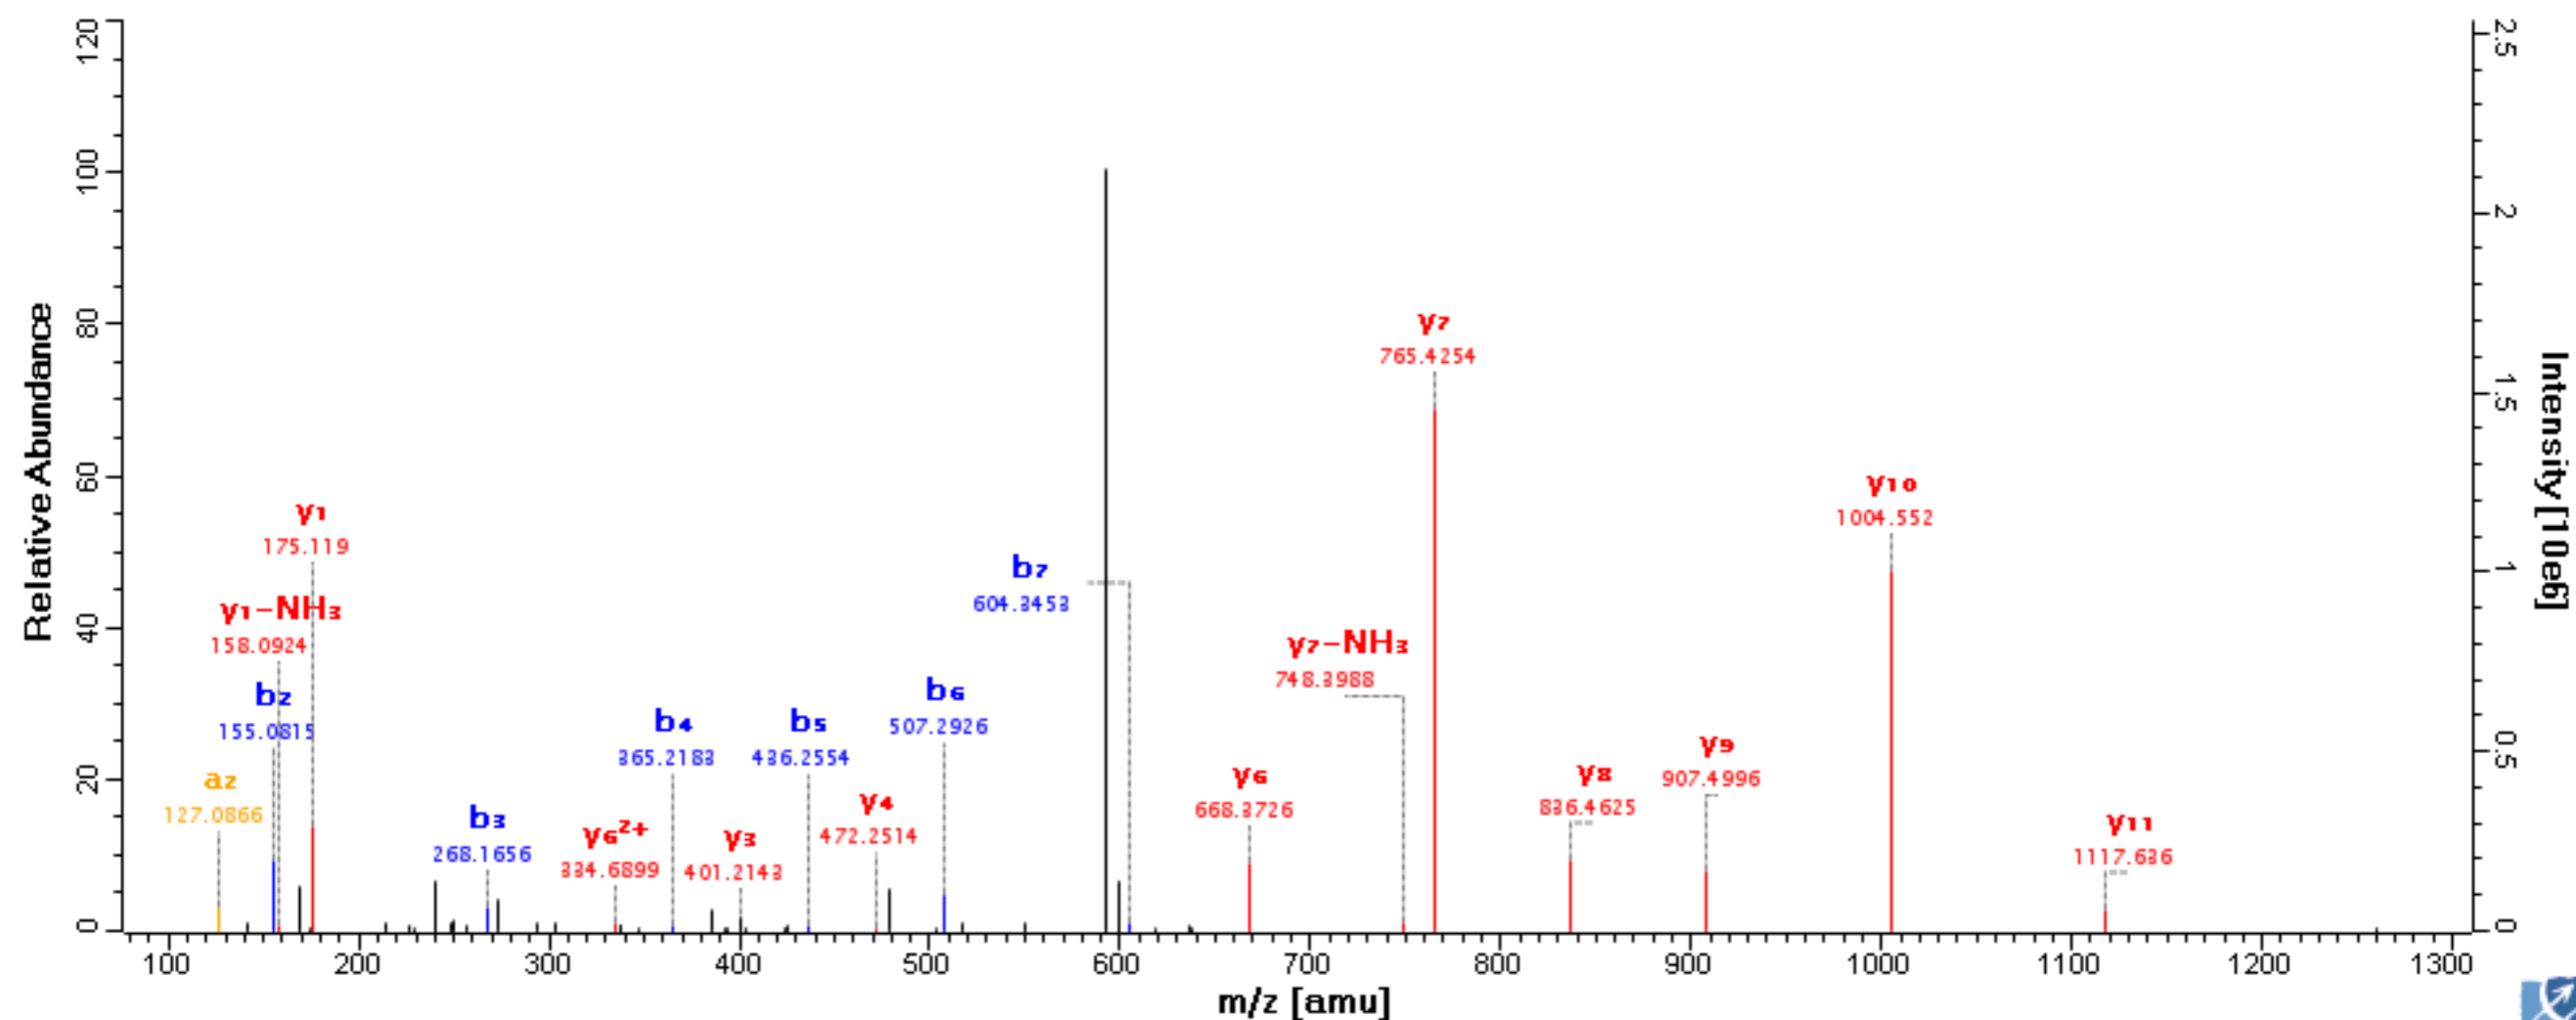

Source: Bibo\_20130531\_RM\_MSC07626\_1\_3  
 Scannumber: 26945  
 Protein: MCAM; MUC18; P43121-1; P43121; A8K6A6; B2R642; B3KXZ9  
 Peptide Score: 98.53  
 Method: FTMS; HCD; 1

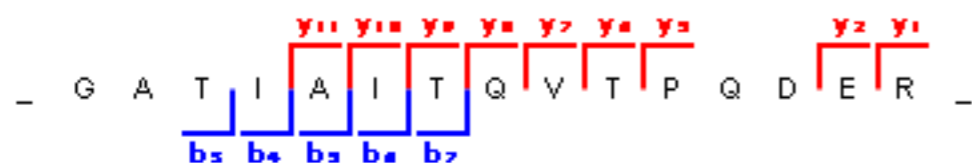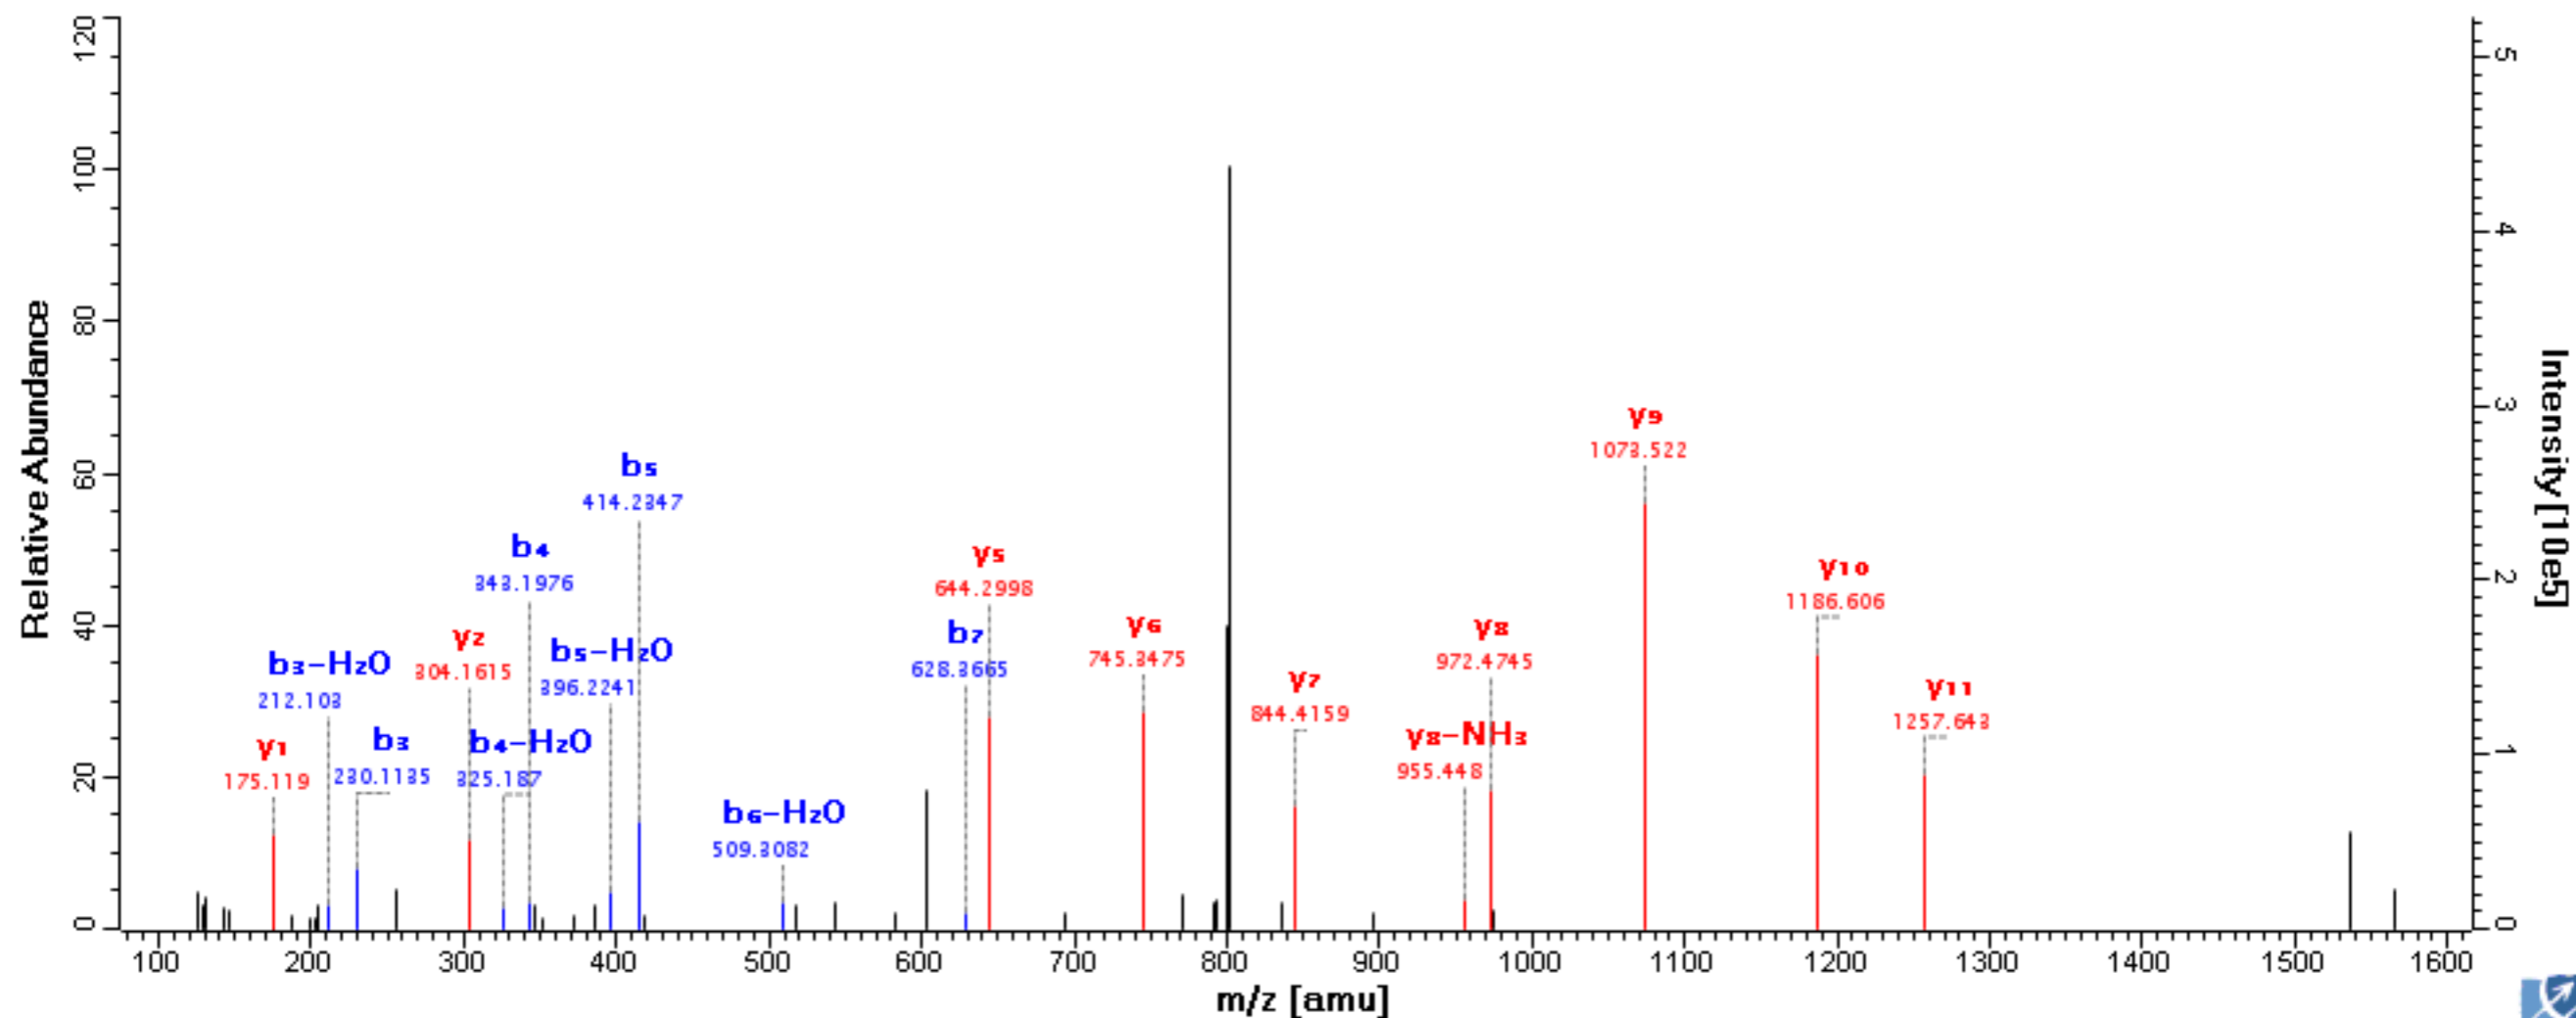

Source: Bibo\_20130531\_RM\_MSC07626\_1\_3  
Scannumber: 28759  
Protein: B4E0D5; E9PDK6  
Peptide Score: 8.12  
Method: FTMS; HCD; 1

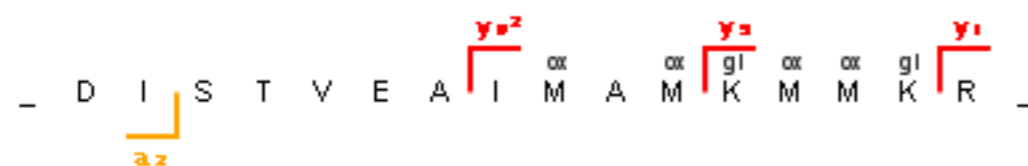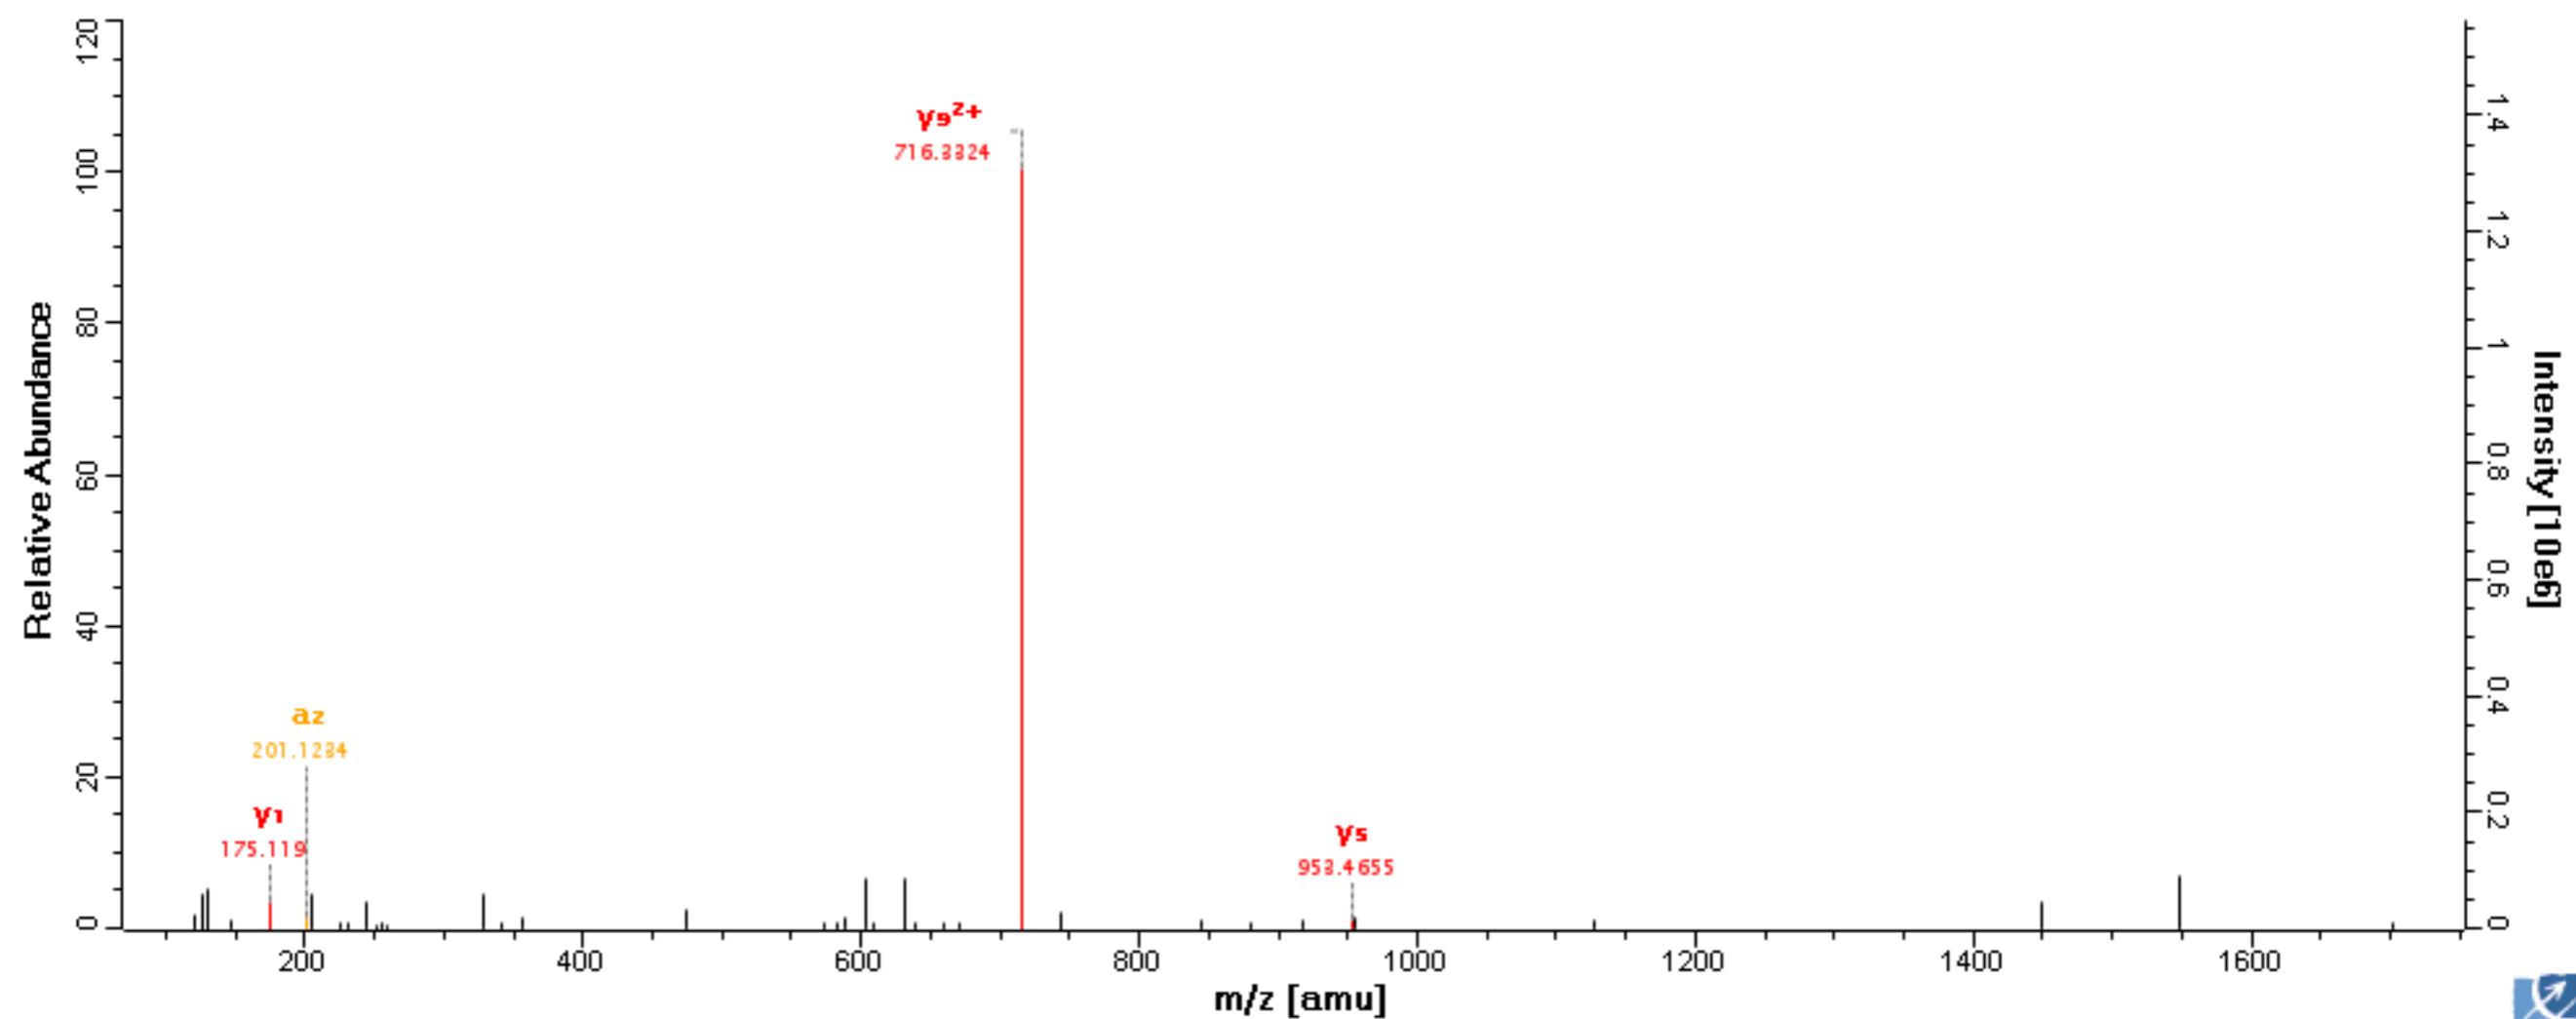

Source: Bibo\_20130531\_RM\_MSC07626\_1\_3  
 Scannumber: 29060  
 Protein: AMS2; MAT2A; MATA2; hCG\_34602; P31153; B4DEX8; B4DN45  
 Peptide Score: 71.55  
 Method: FTMS; HCD; 1

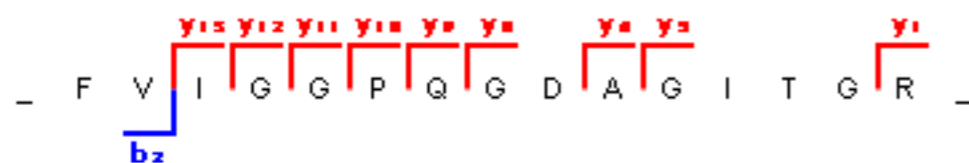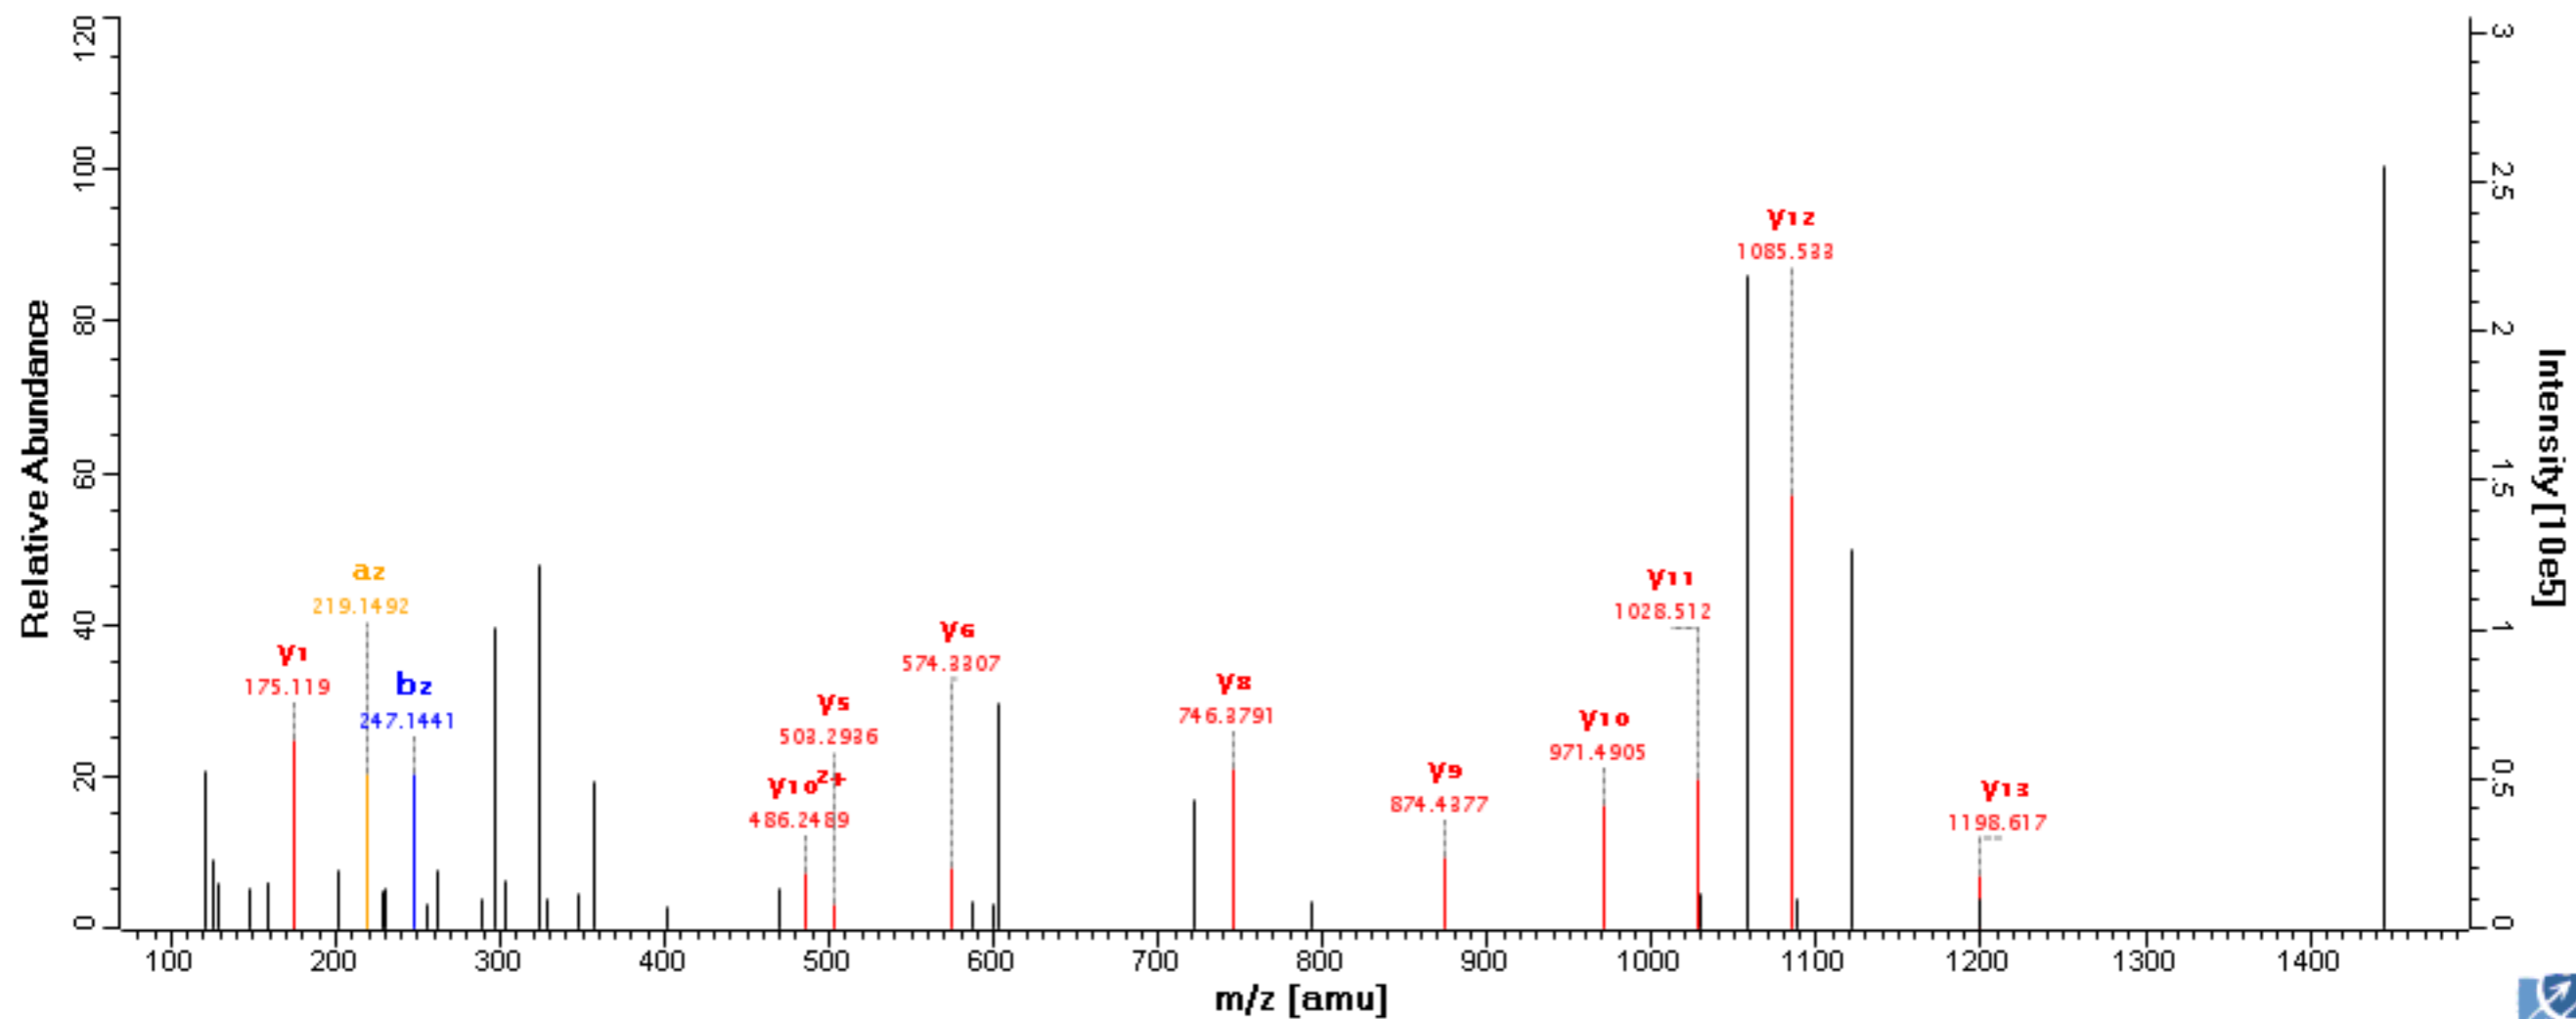

Source: Bibo\_20130531\_RM\_MSC07626\_1\_3  
Scannumber: 34388  
Protein: SUSD3; UNQ9387/PRO34275; Q96L08-3; Q96L08  
Peptide Score: 5.66  
Method: FTMS; HCD; 1

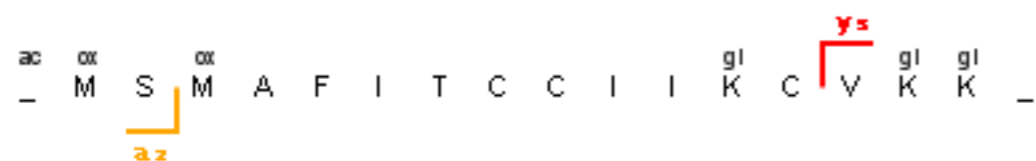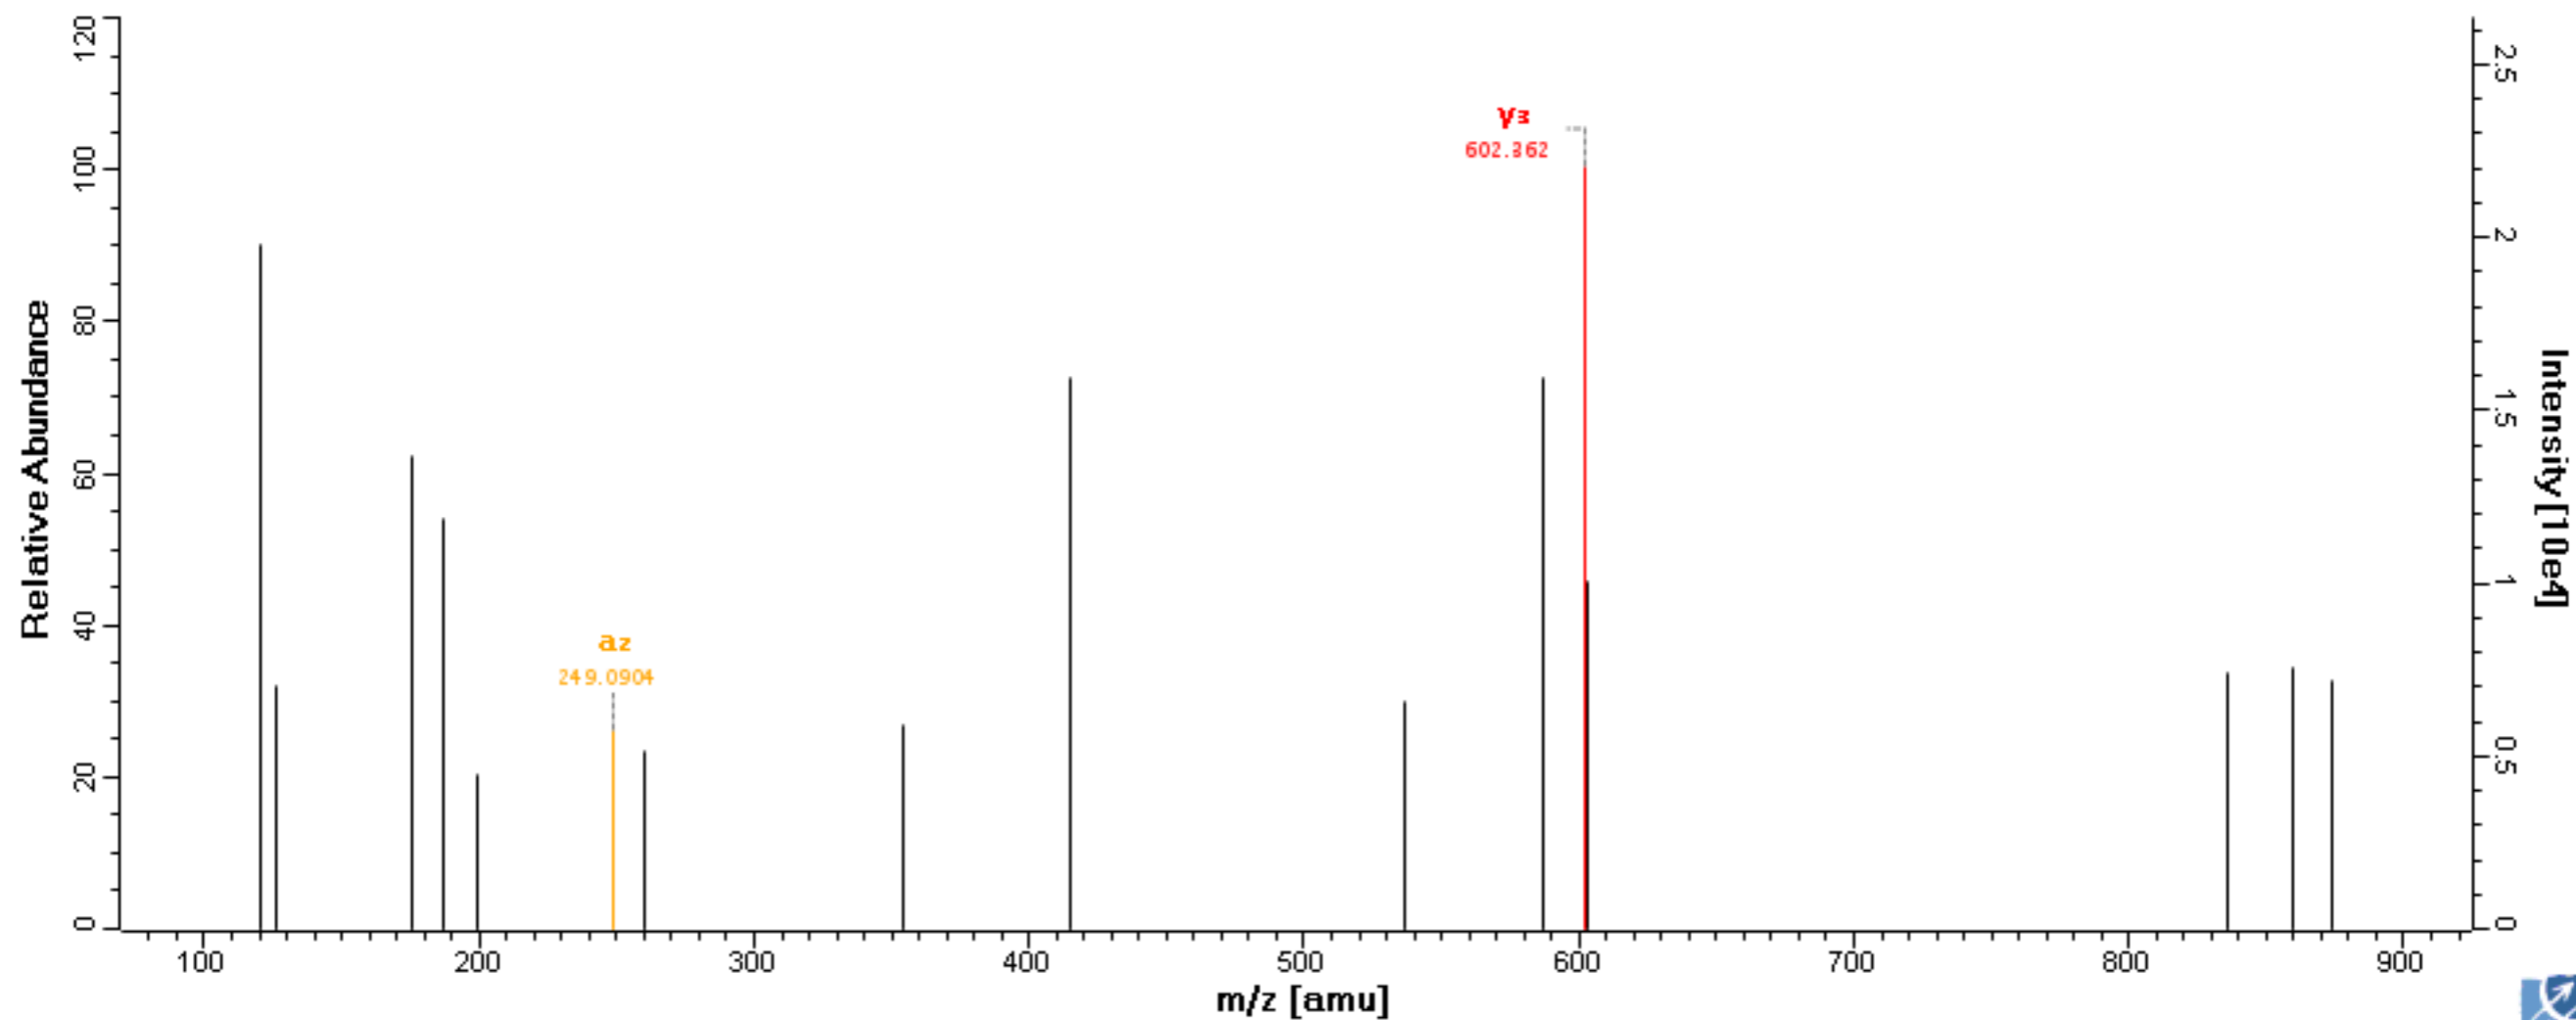

Source: Bibo\_20130531\_RM\_MSC07626\_1\_3  
Scannumber: 34792  
Protein: RAL; RALA; P11233  
Peptide Score: 130.06  
Method: FTMS; HCD; 1

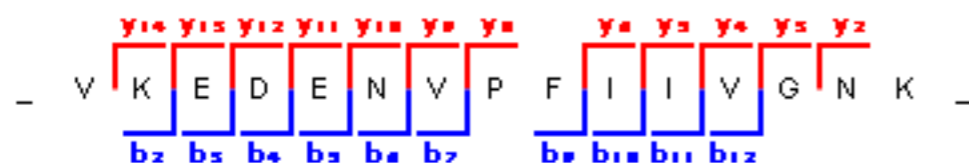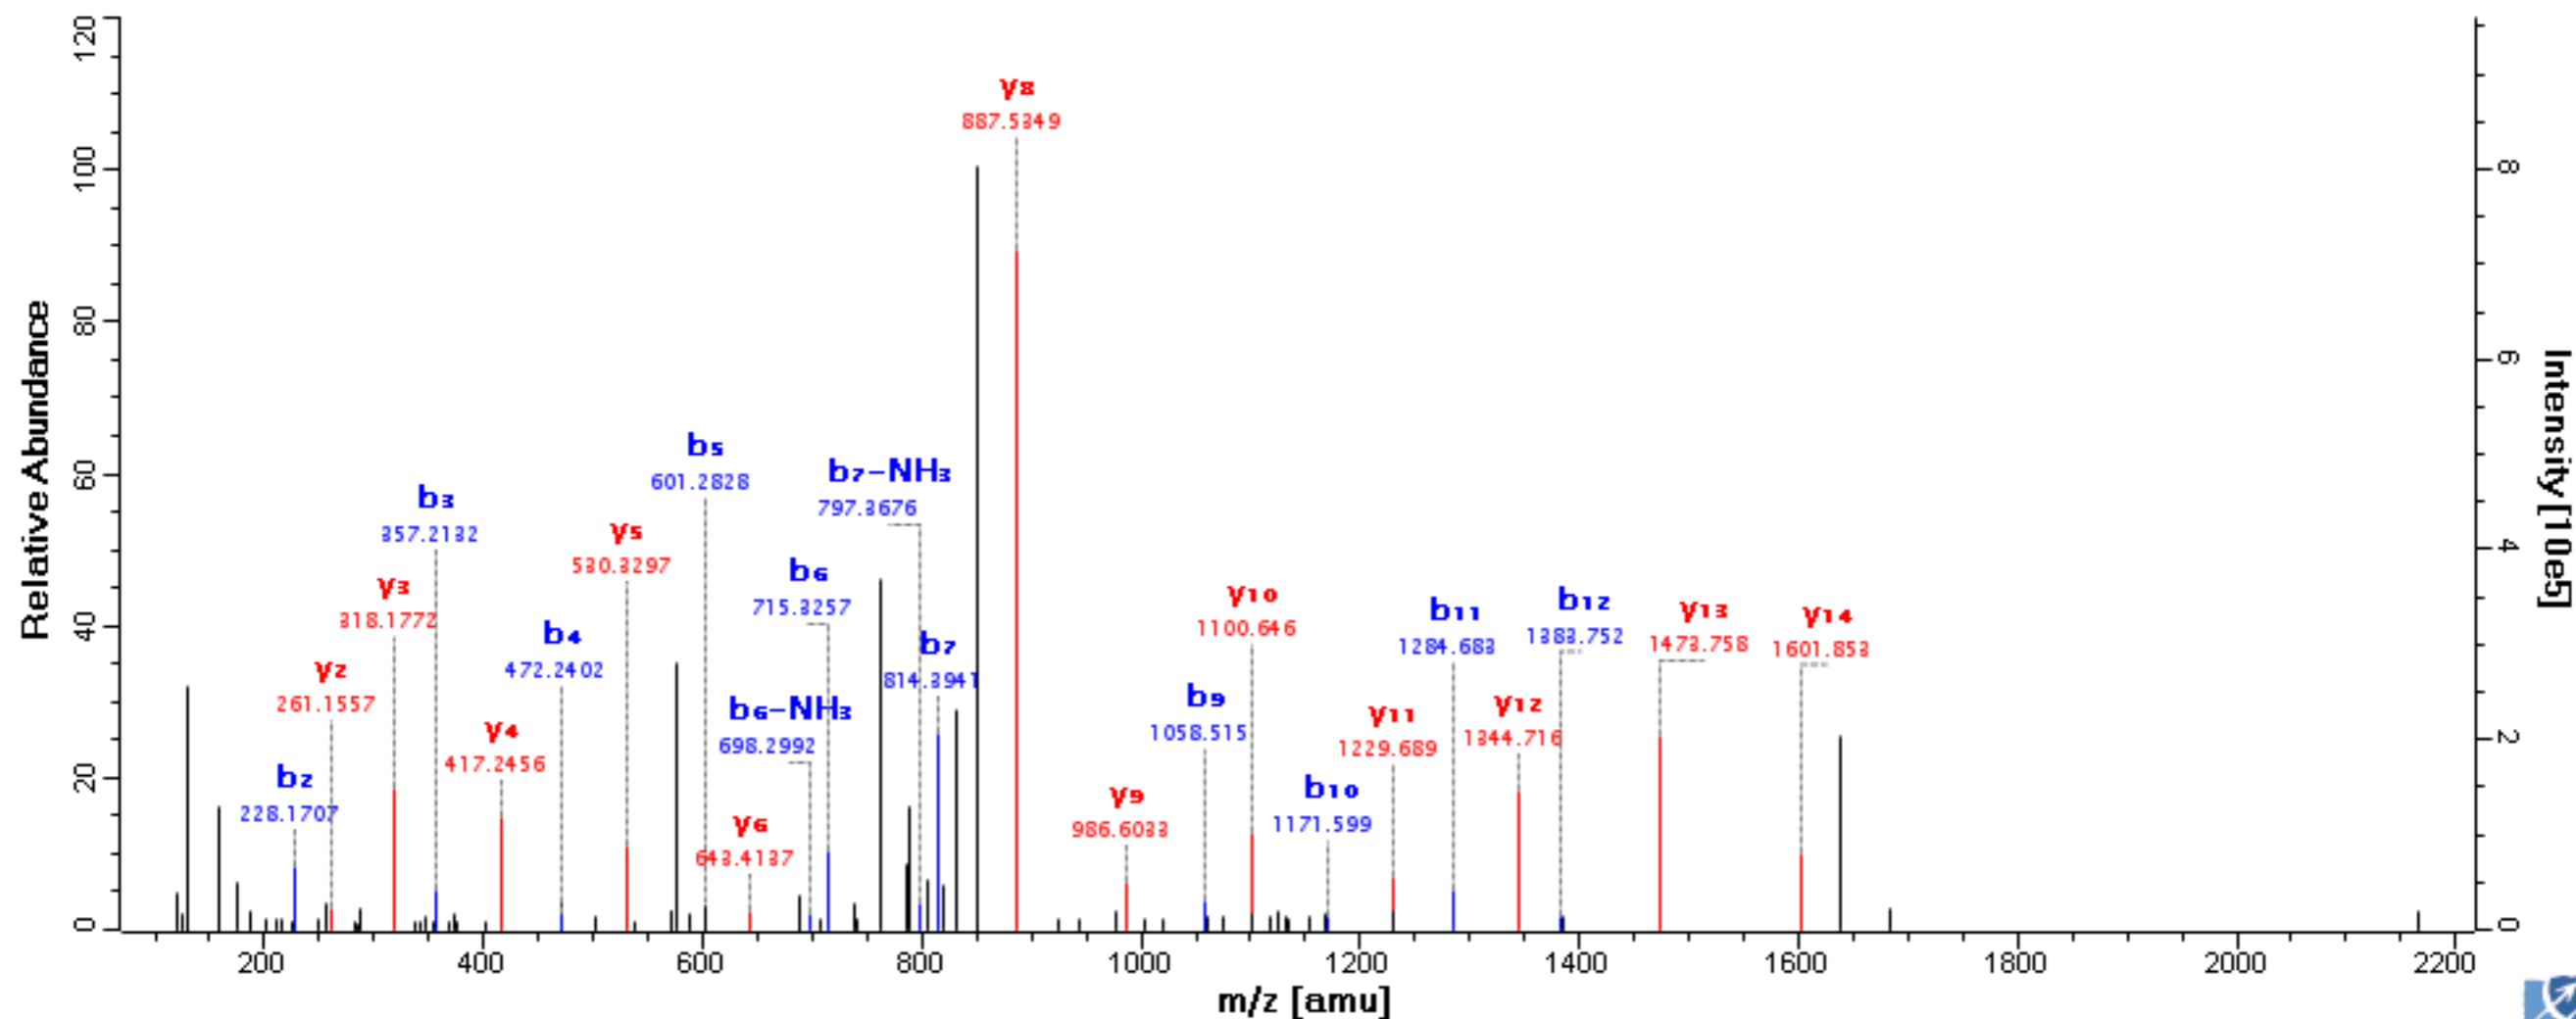

Source: Bibo\_20130531\_RM\_MSC07626\_1\_3  
 Scannumber: 35927  
 Protein: PRSS1; TRP1; TRY1; TRYP1; PRSS3; PRSS2; TRY2; TRYP2; PRSS1; hCG\_1770551; tcag7.1285; TRY8; trypsinogen 8; PRSS1; TRP1; TRY1; TRYP1; T6; TRY6; PRSS1; E7EQ64; Q7Z5F3; P07477;  
 Peptide Score: 70.96  
 Method: FTMS; HCD; 1

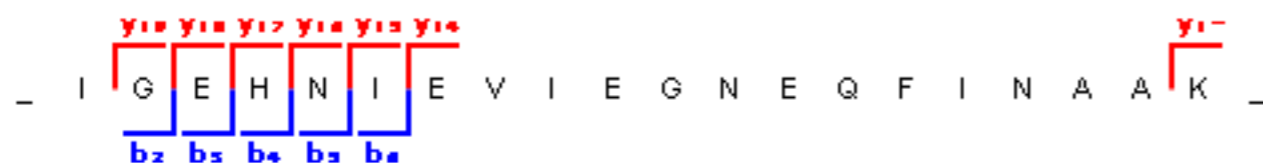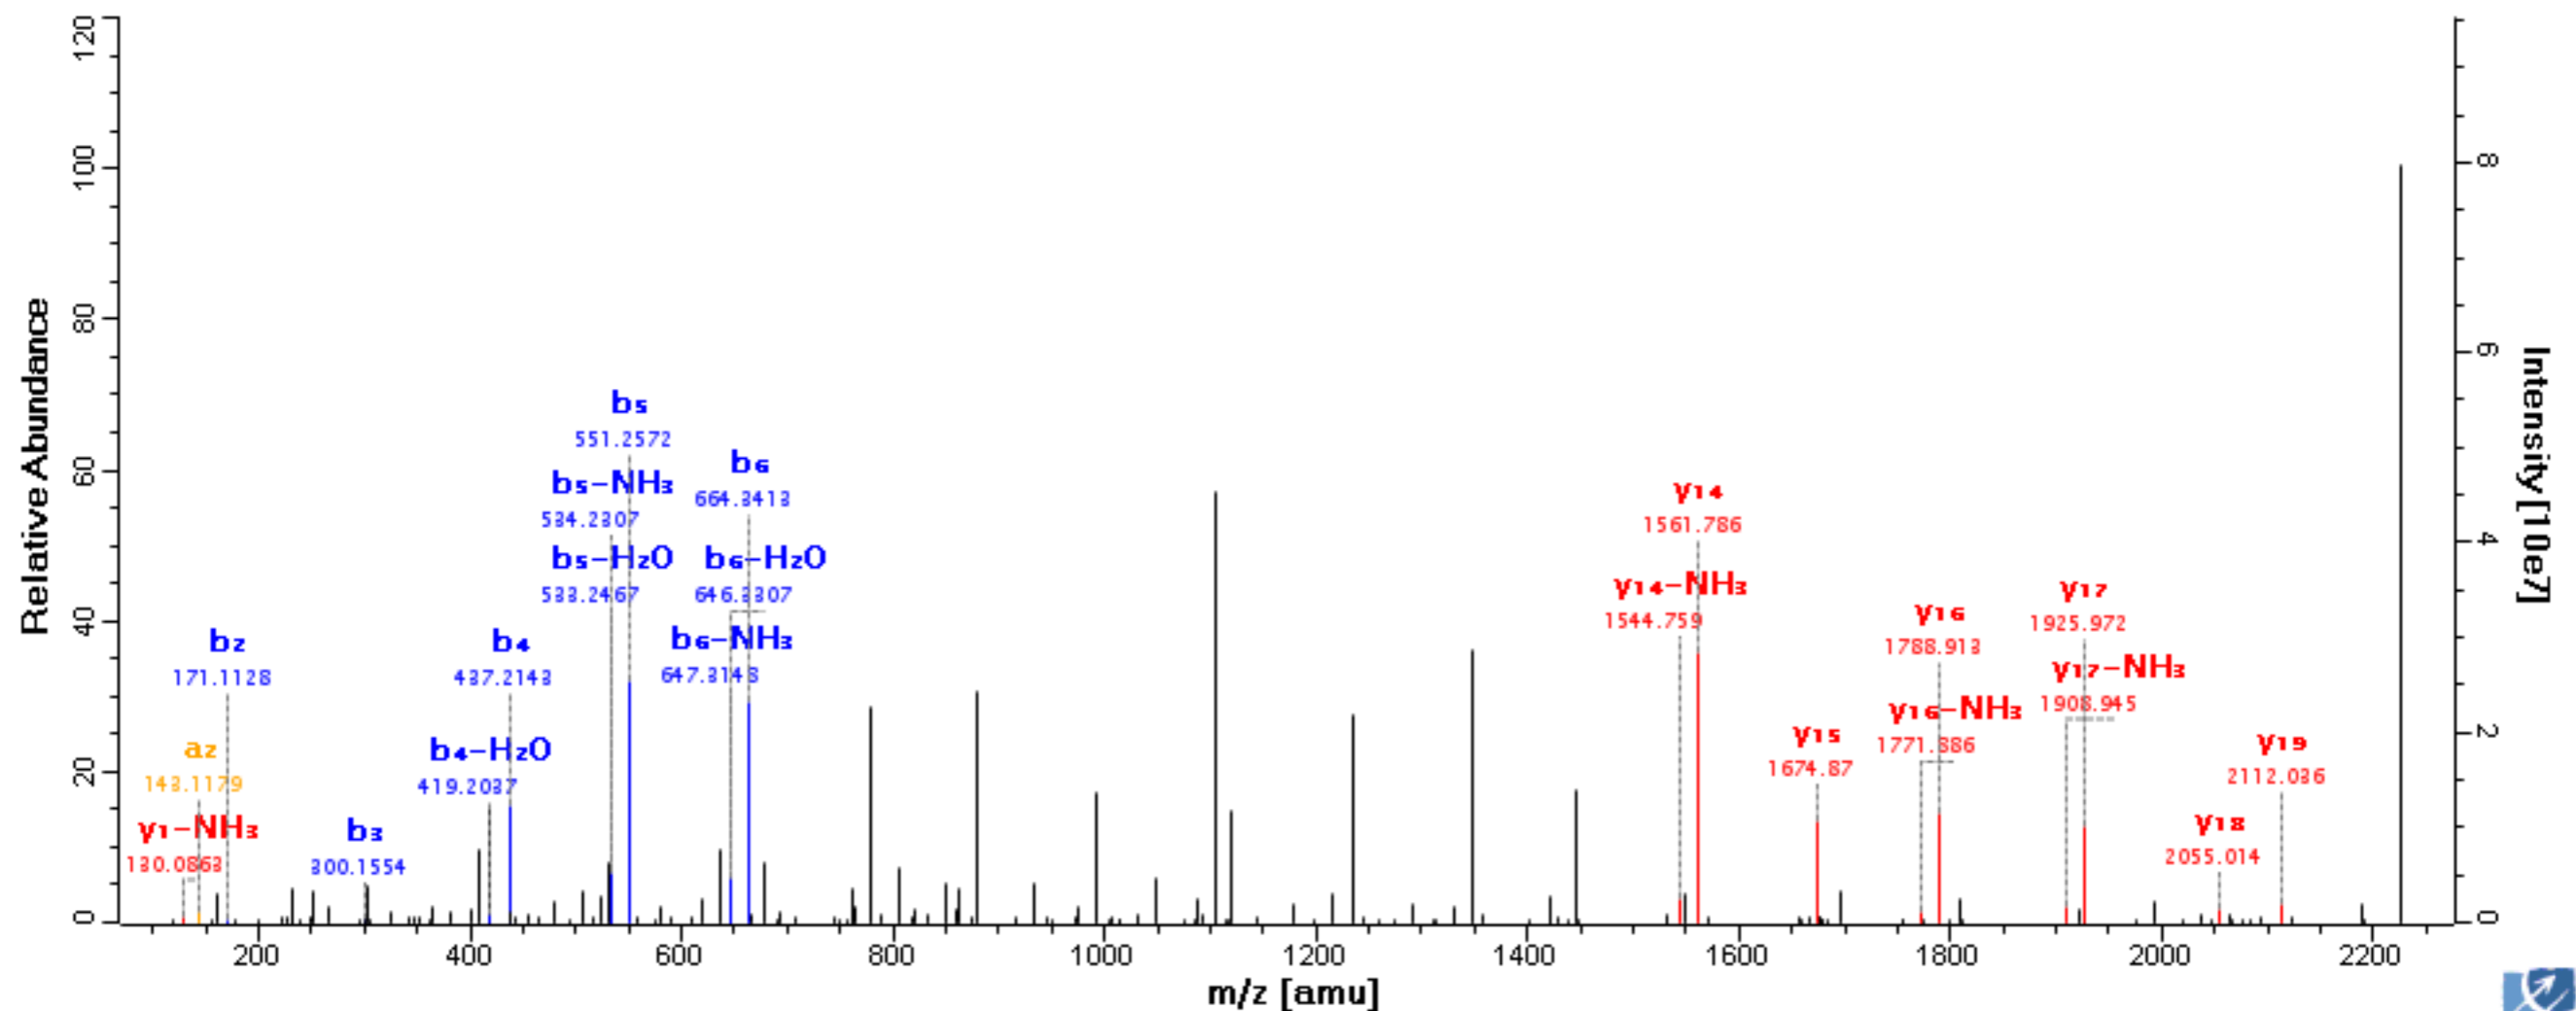

Source: Bibo\_20130531\_RM\_MSC07626\_1\_3

Scannumber: 36181

Protein: PRSS1; TRP1; TRY1; TRYP1; PRSS3; PRSS2; TRY2; TRYP2; PRSS1; hCG\_1770551; tcag7.1285; TRY8; trypsinogen 8; PRSS1; TRP1; TRY1; TRYP1; T6; TRY6; PRSS1; E7EQ64; Q7Z5F3; P07477;

Peptide Score: 72.82

Method: FTMS; HCD; 1

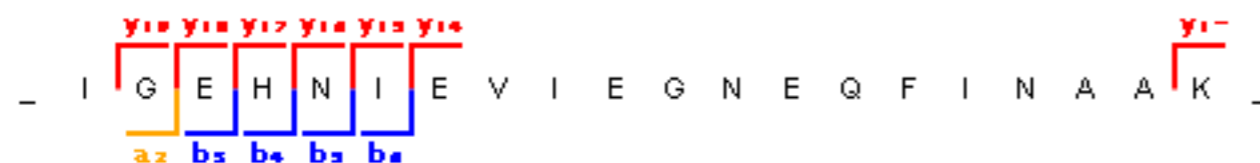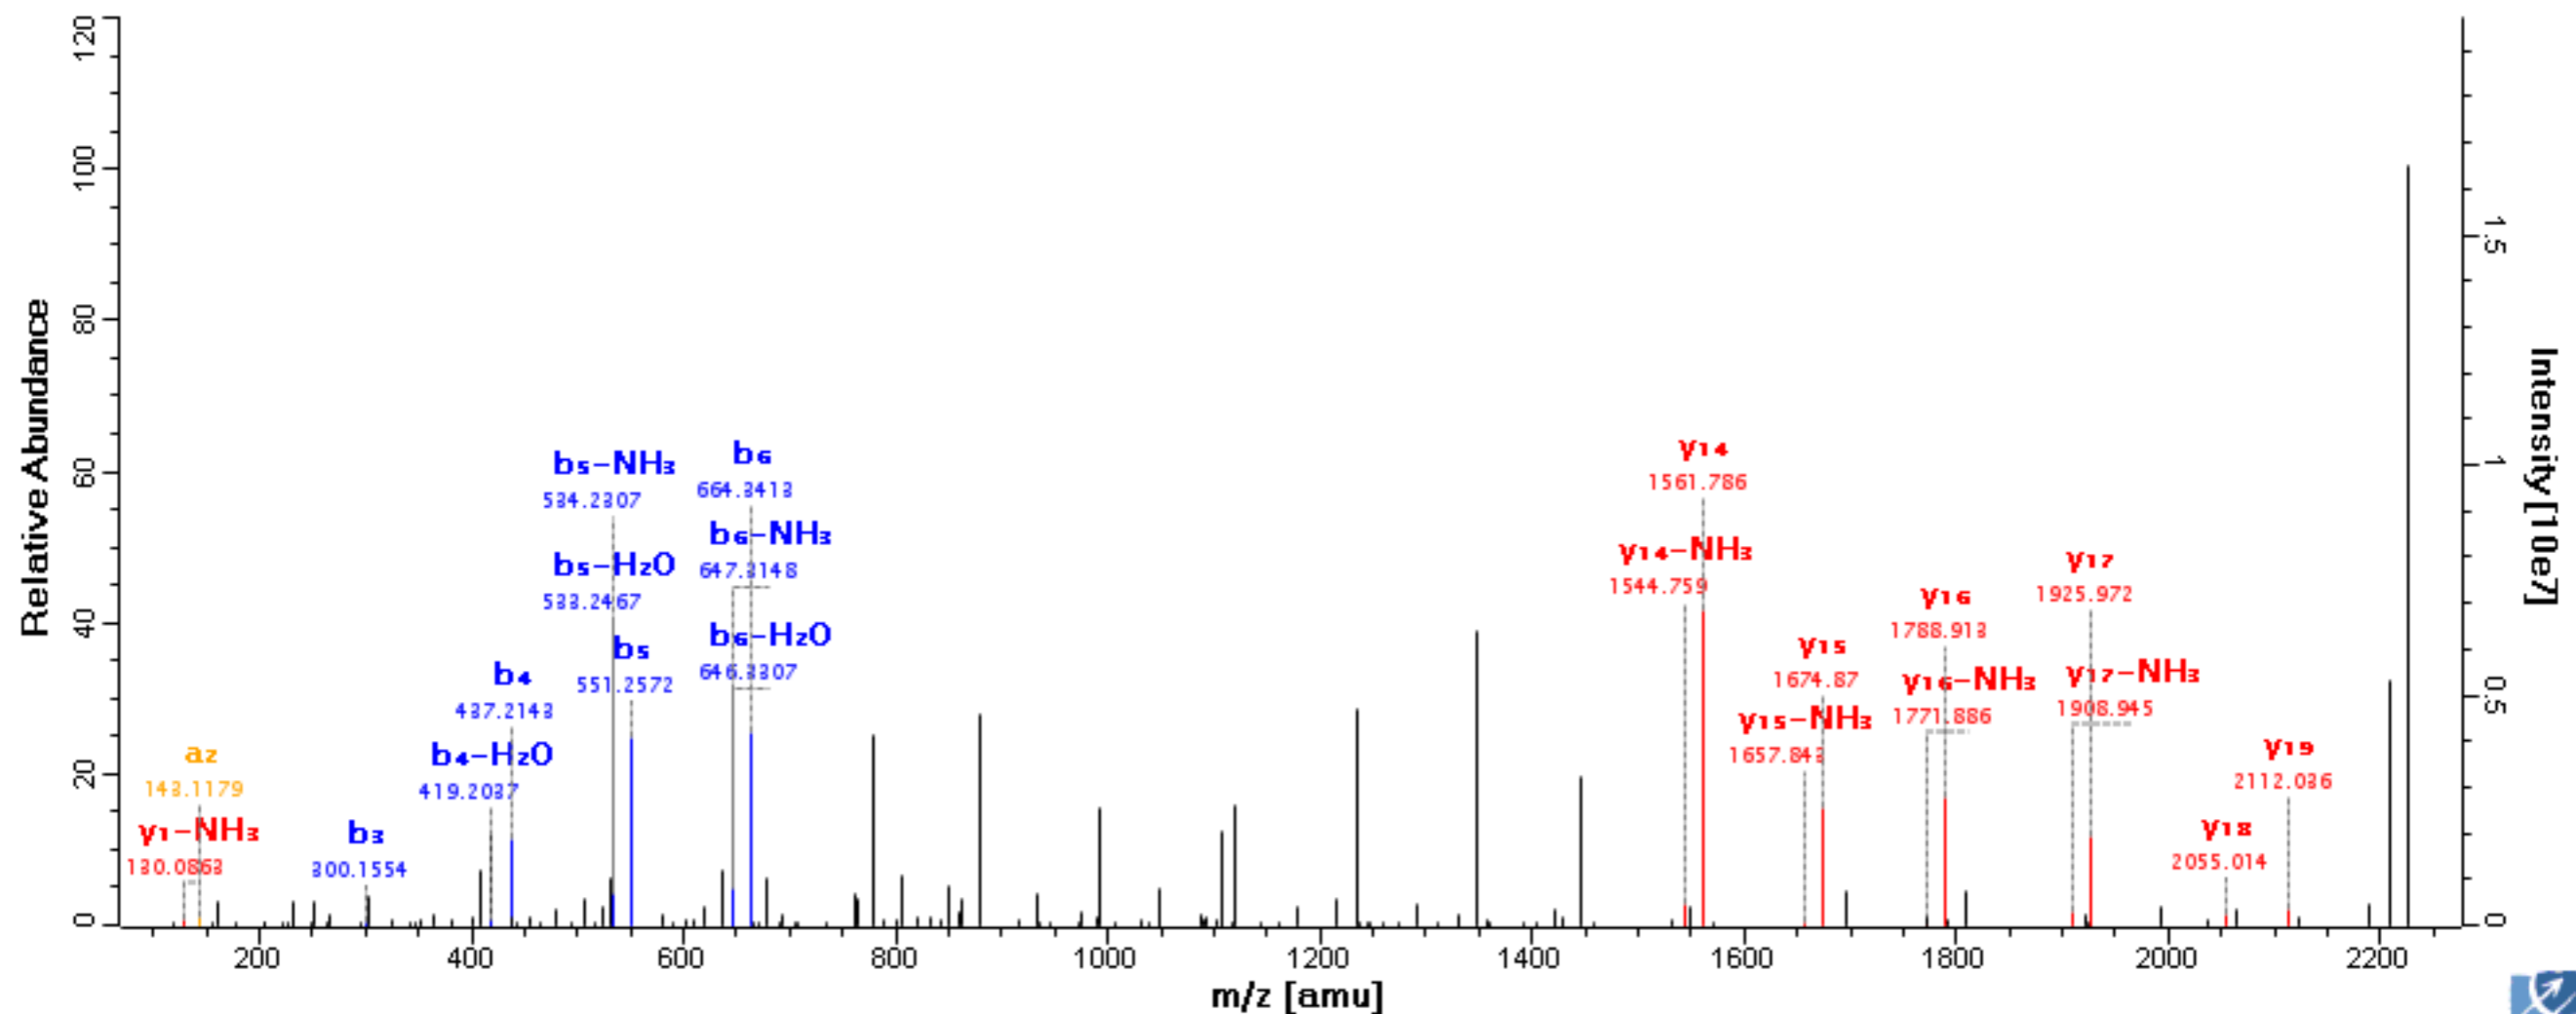

Source: Bibo\_20130531\_RM\_MSC07626\_1\_3  
 Scannumber: 36899  
 Protein: CBX; CBX1; hCG\_2000655; CBX3; CCDC32; hCG\_1745364; hCG\_1999239; tcag7.173; CBX1; P83916; E9PCS5; Q6IBN6; Q13185; A4D177; B5MD17  
 Peptide Score: 117.92  
 Method: FTMS; HCD; 1

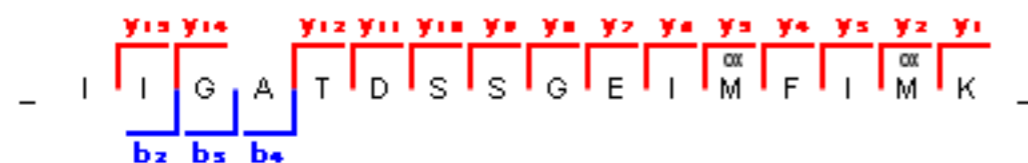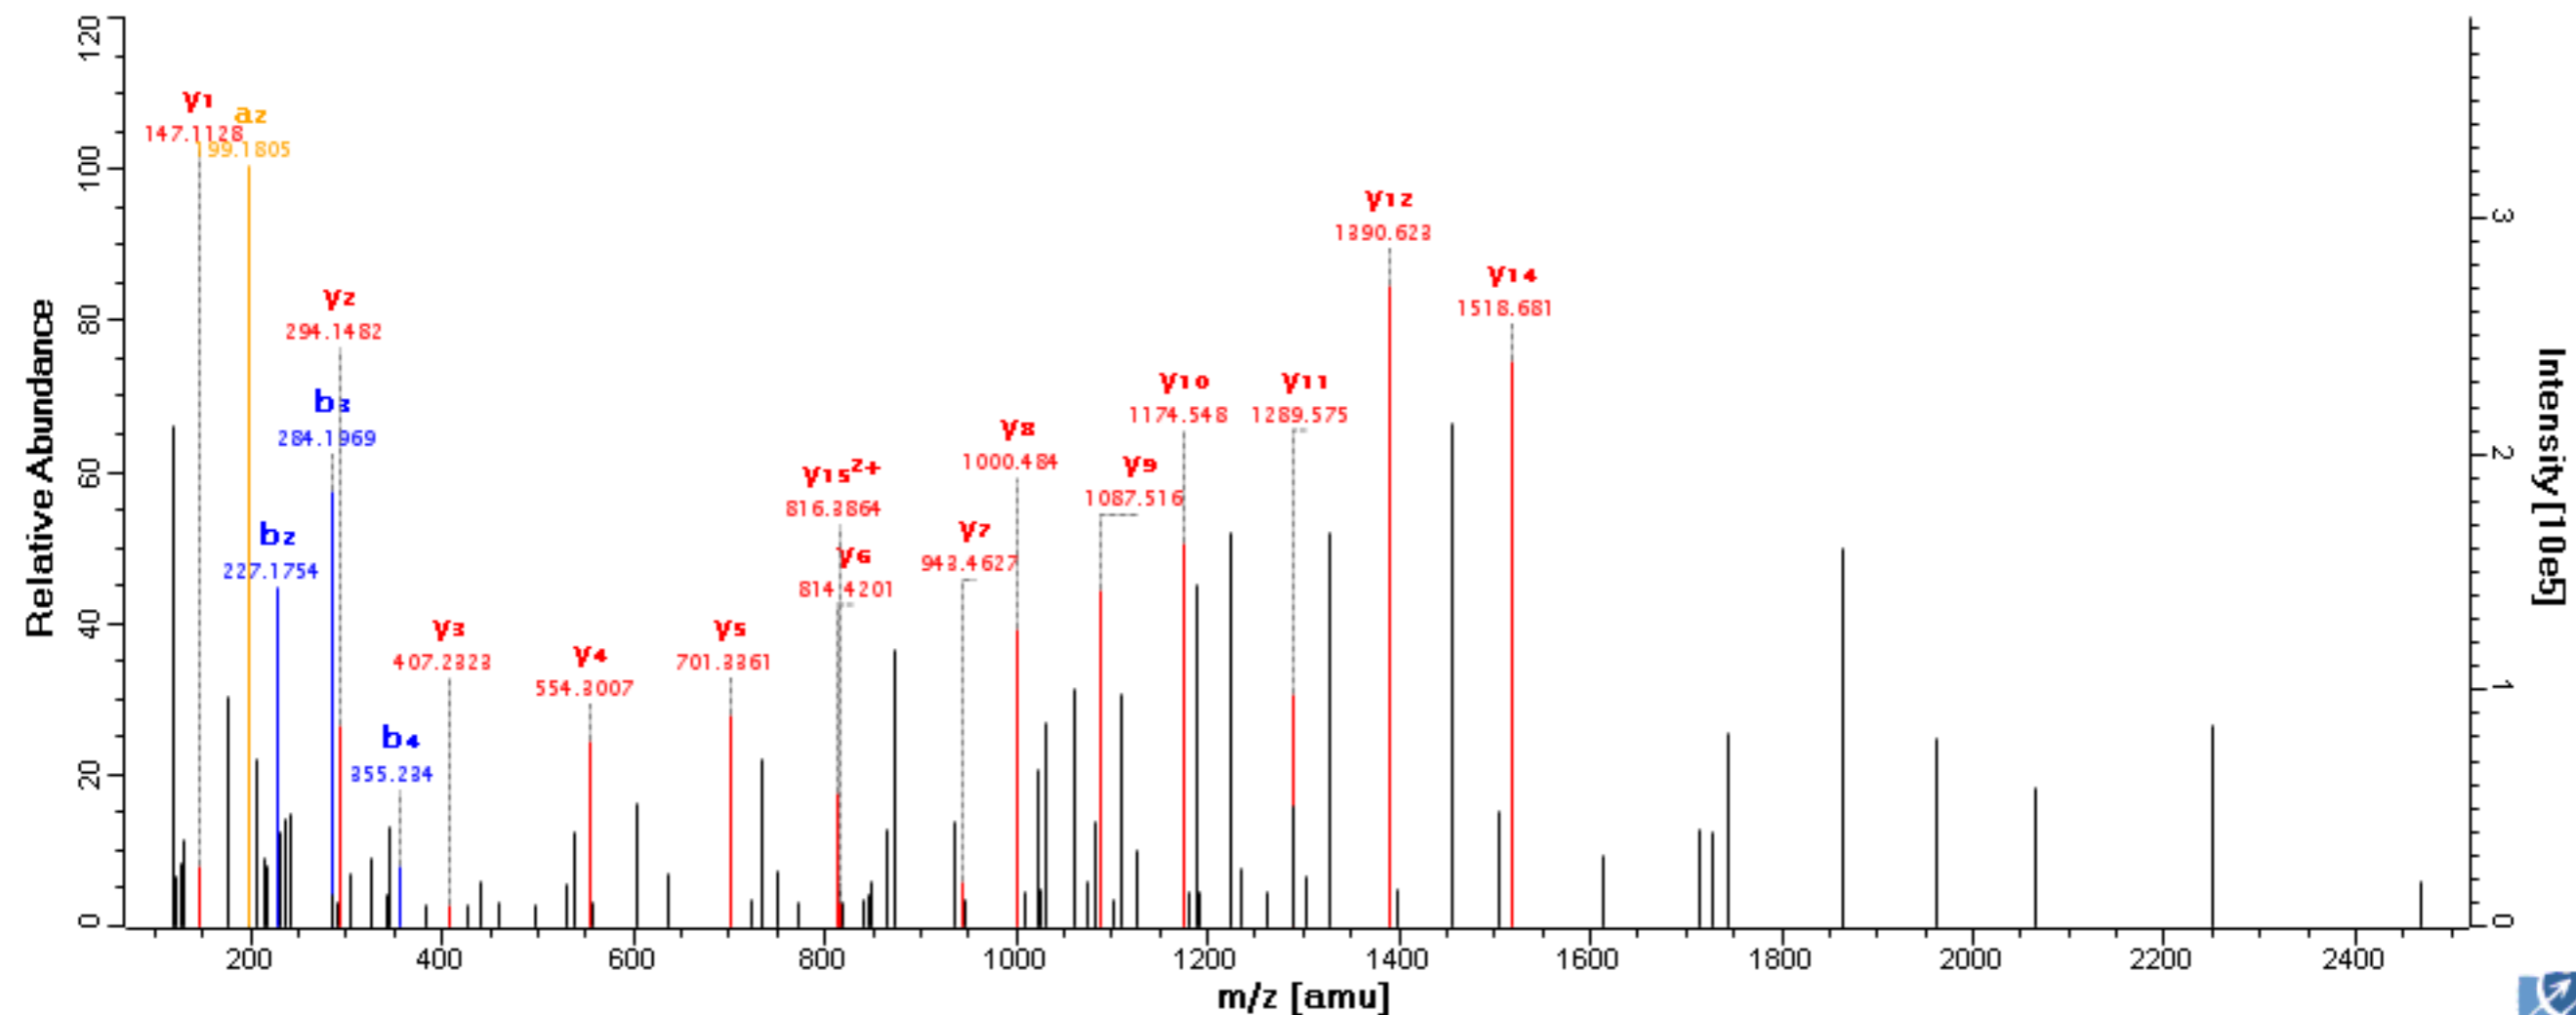

Source: Bibo\_20130531\_RM\_MSC07626\_1\_3  
 Scannumber: 40493  
 Protein: CDV3; hCG\_14782; CDV3; H41; CDV3; H41; CDV3; H41; D3DND1; Q9UKY7-1; Q9UKY7; Q9UKY7-2; Q9UKY7; D6R9V8; Q9UKY7-3; Q9UKY7; D6RFH2; D6RAVD  
 Peptide Score: 34.57  
 Method: FTMS; HCD; 1

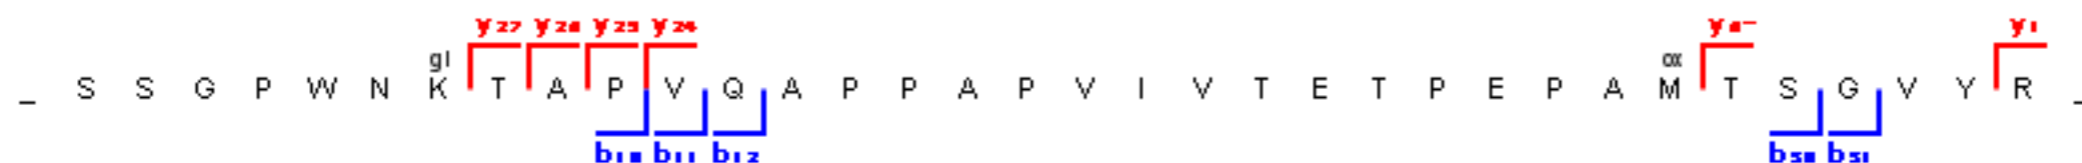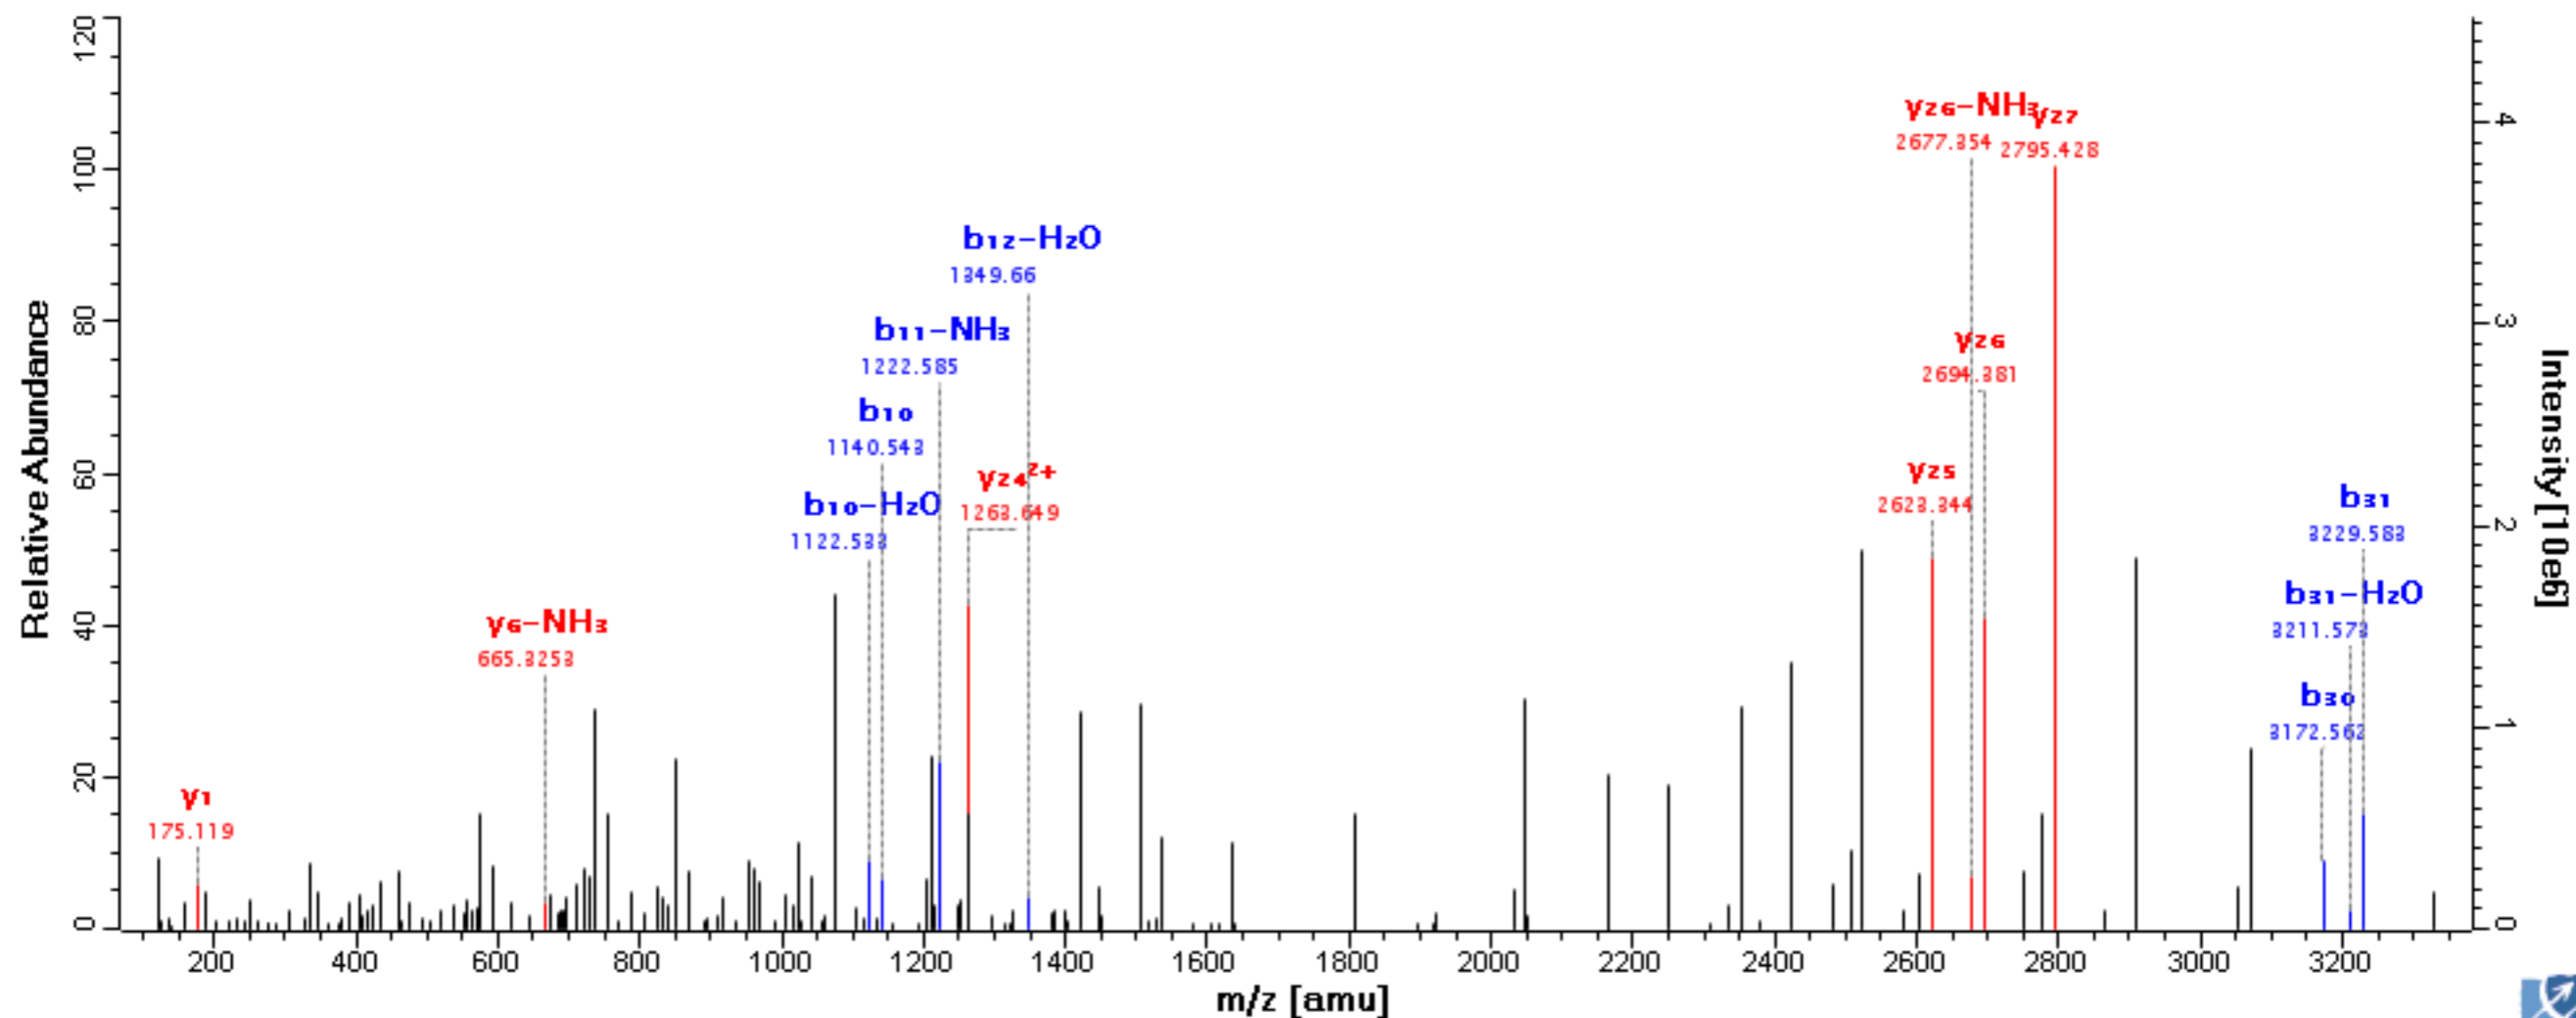

Source: Bibo\_20130531\_RM\_MSC07626\_1\_3  
 Scannumber: 45293  
 Protein: GCP16; GOLGA7; HDCKB03P; HSPC041; Q7Z5G4  
 Peptide Score: 79.87  
 Method: FTMS; HCD; 1

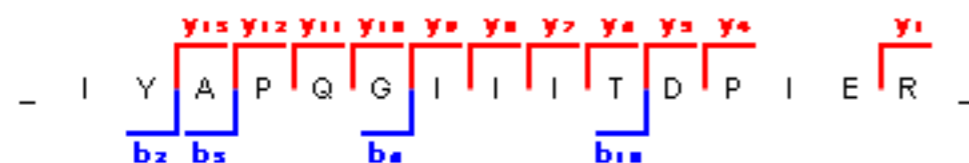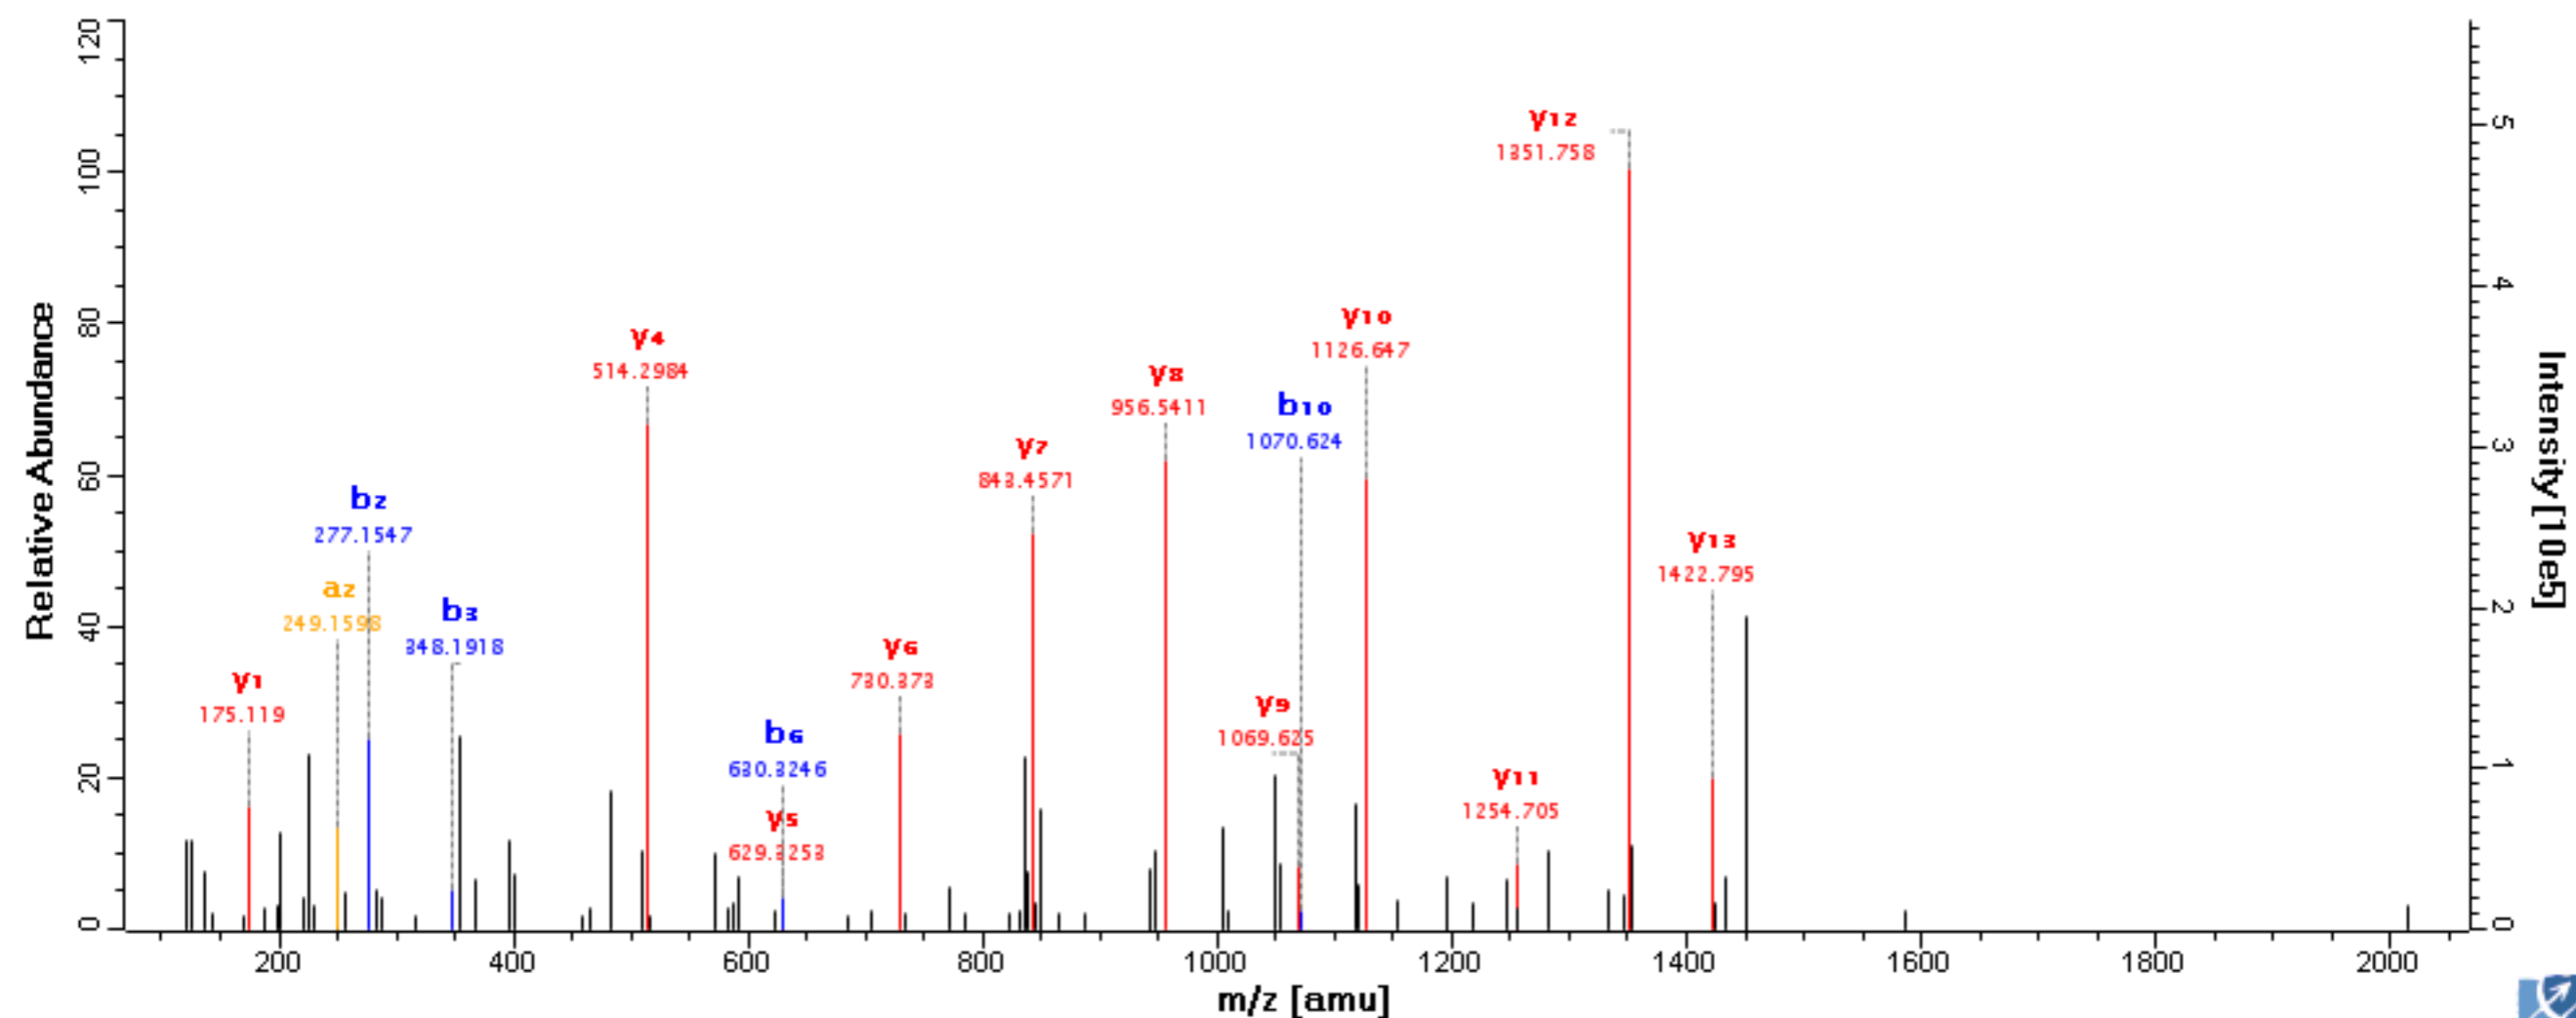

Source: Bibo\_20130531\_RM\_MSC07626\_1\_3  
Scannumber: 45305  
Protein: hCG\_2005638; BAT1; XXbac-BPG296P20.6-019; DASS-161H22.1-019; XXbac-BCX270M2.2-019; DAQB-72H16.1-019; DAMA-25N12.12-019; DADB-26I14.7-019; DAMA-BMC190B12.8-019  
Peptide Score: 2.63  
Method: FTMS; HCD; 1

ac ox ox ox  
\_ M W T M S S W T M K M M R \_

y<sub>1</sub>

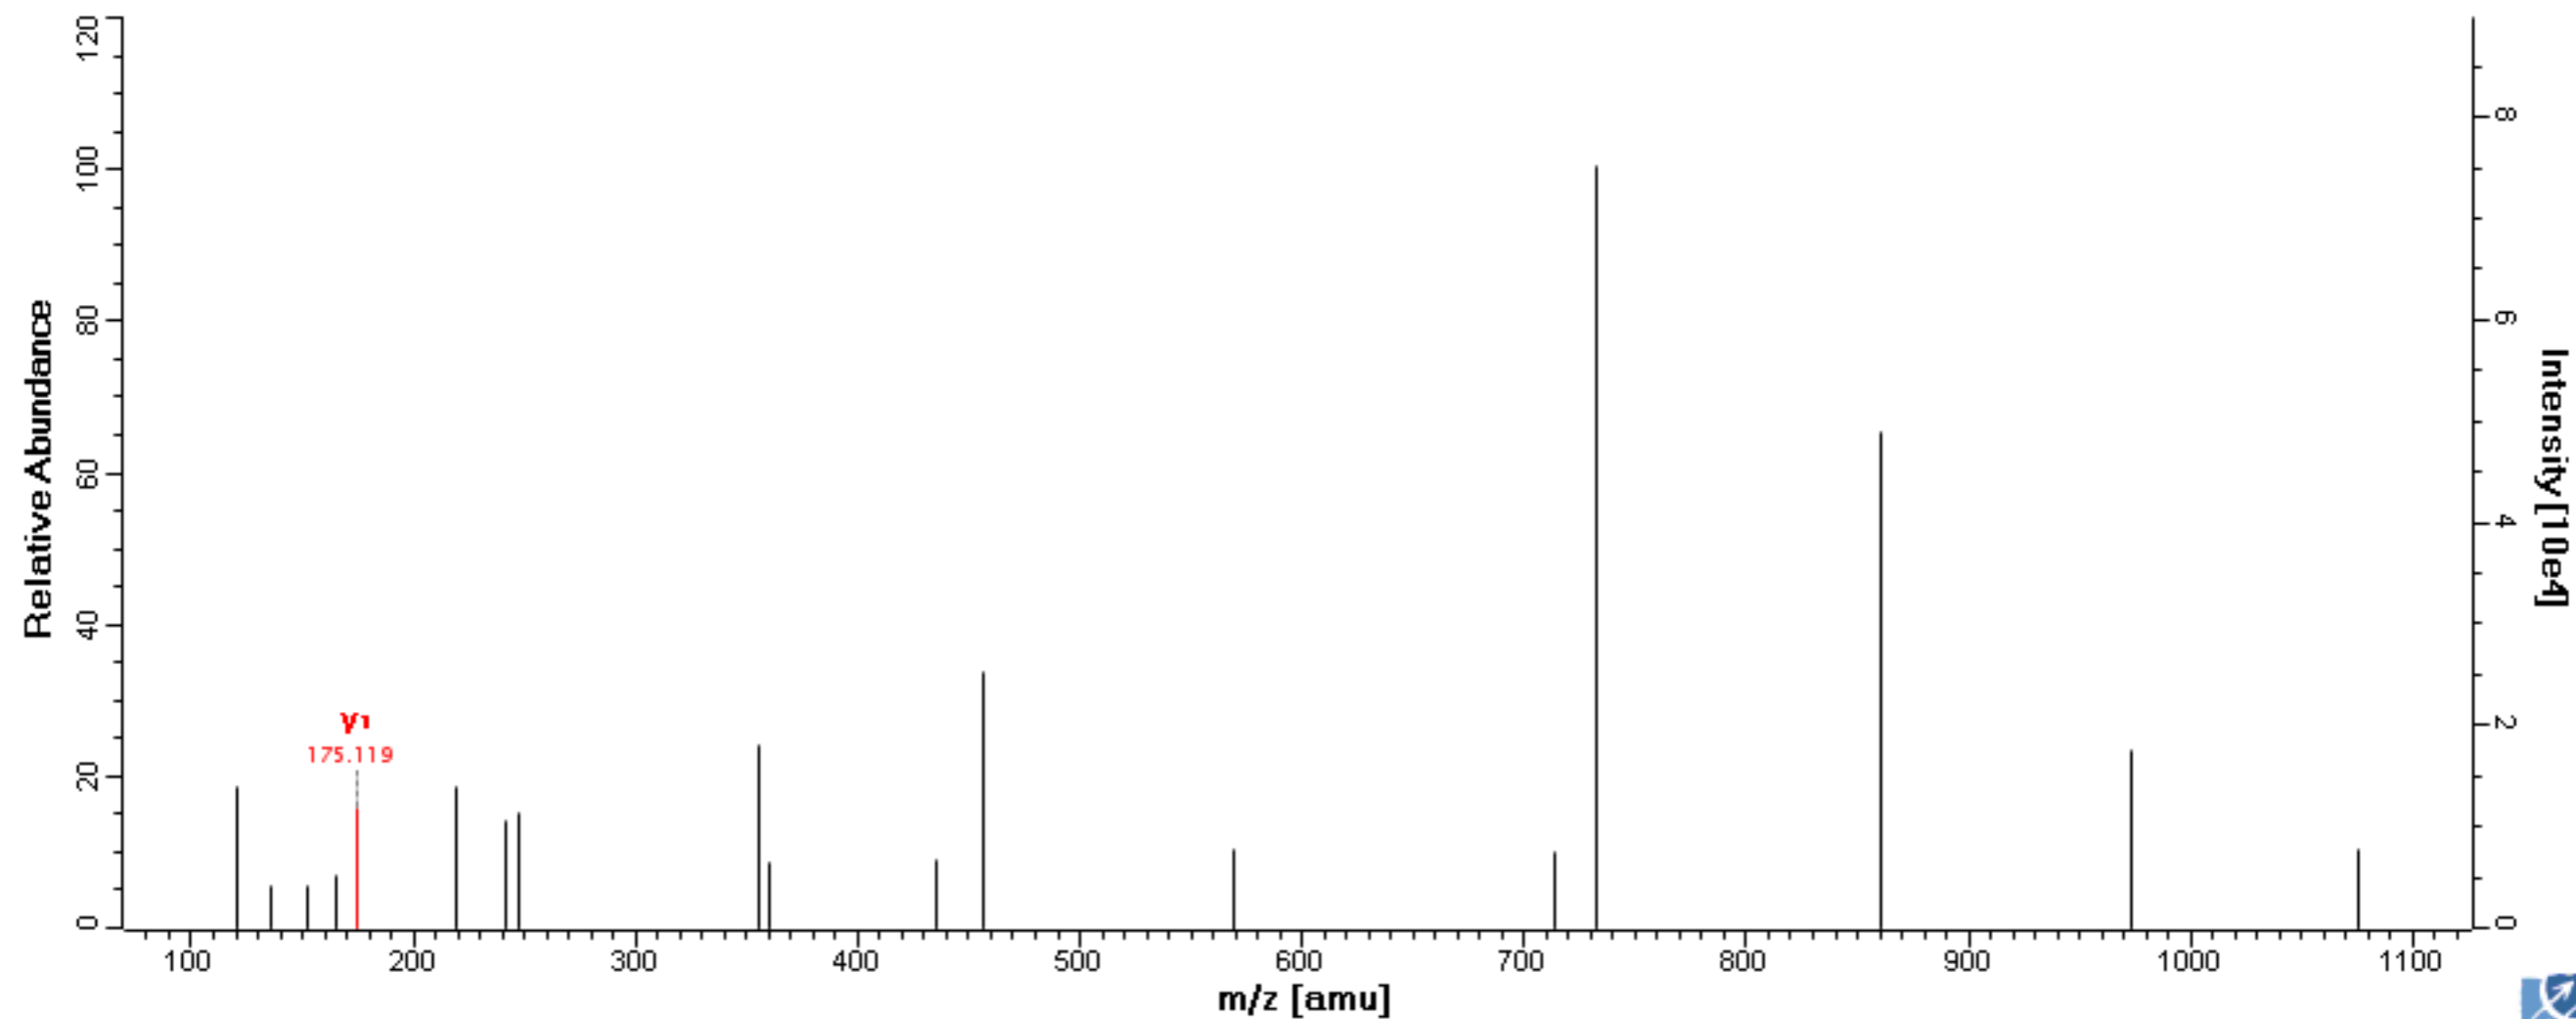

Source: Bibo\_20130531\_RM\_MSC07626\_1\_3  
 Scannumber: 45349  
 Protein: CAGB; CFAG; MRP14; S100A9; P06702; B2R4M6  
 Peptide Score: 97.55  
 Method: FTMS; HCD; 1

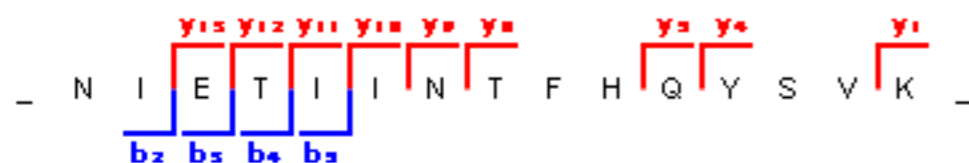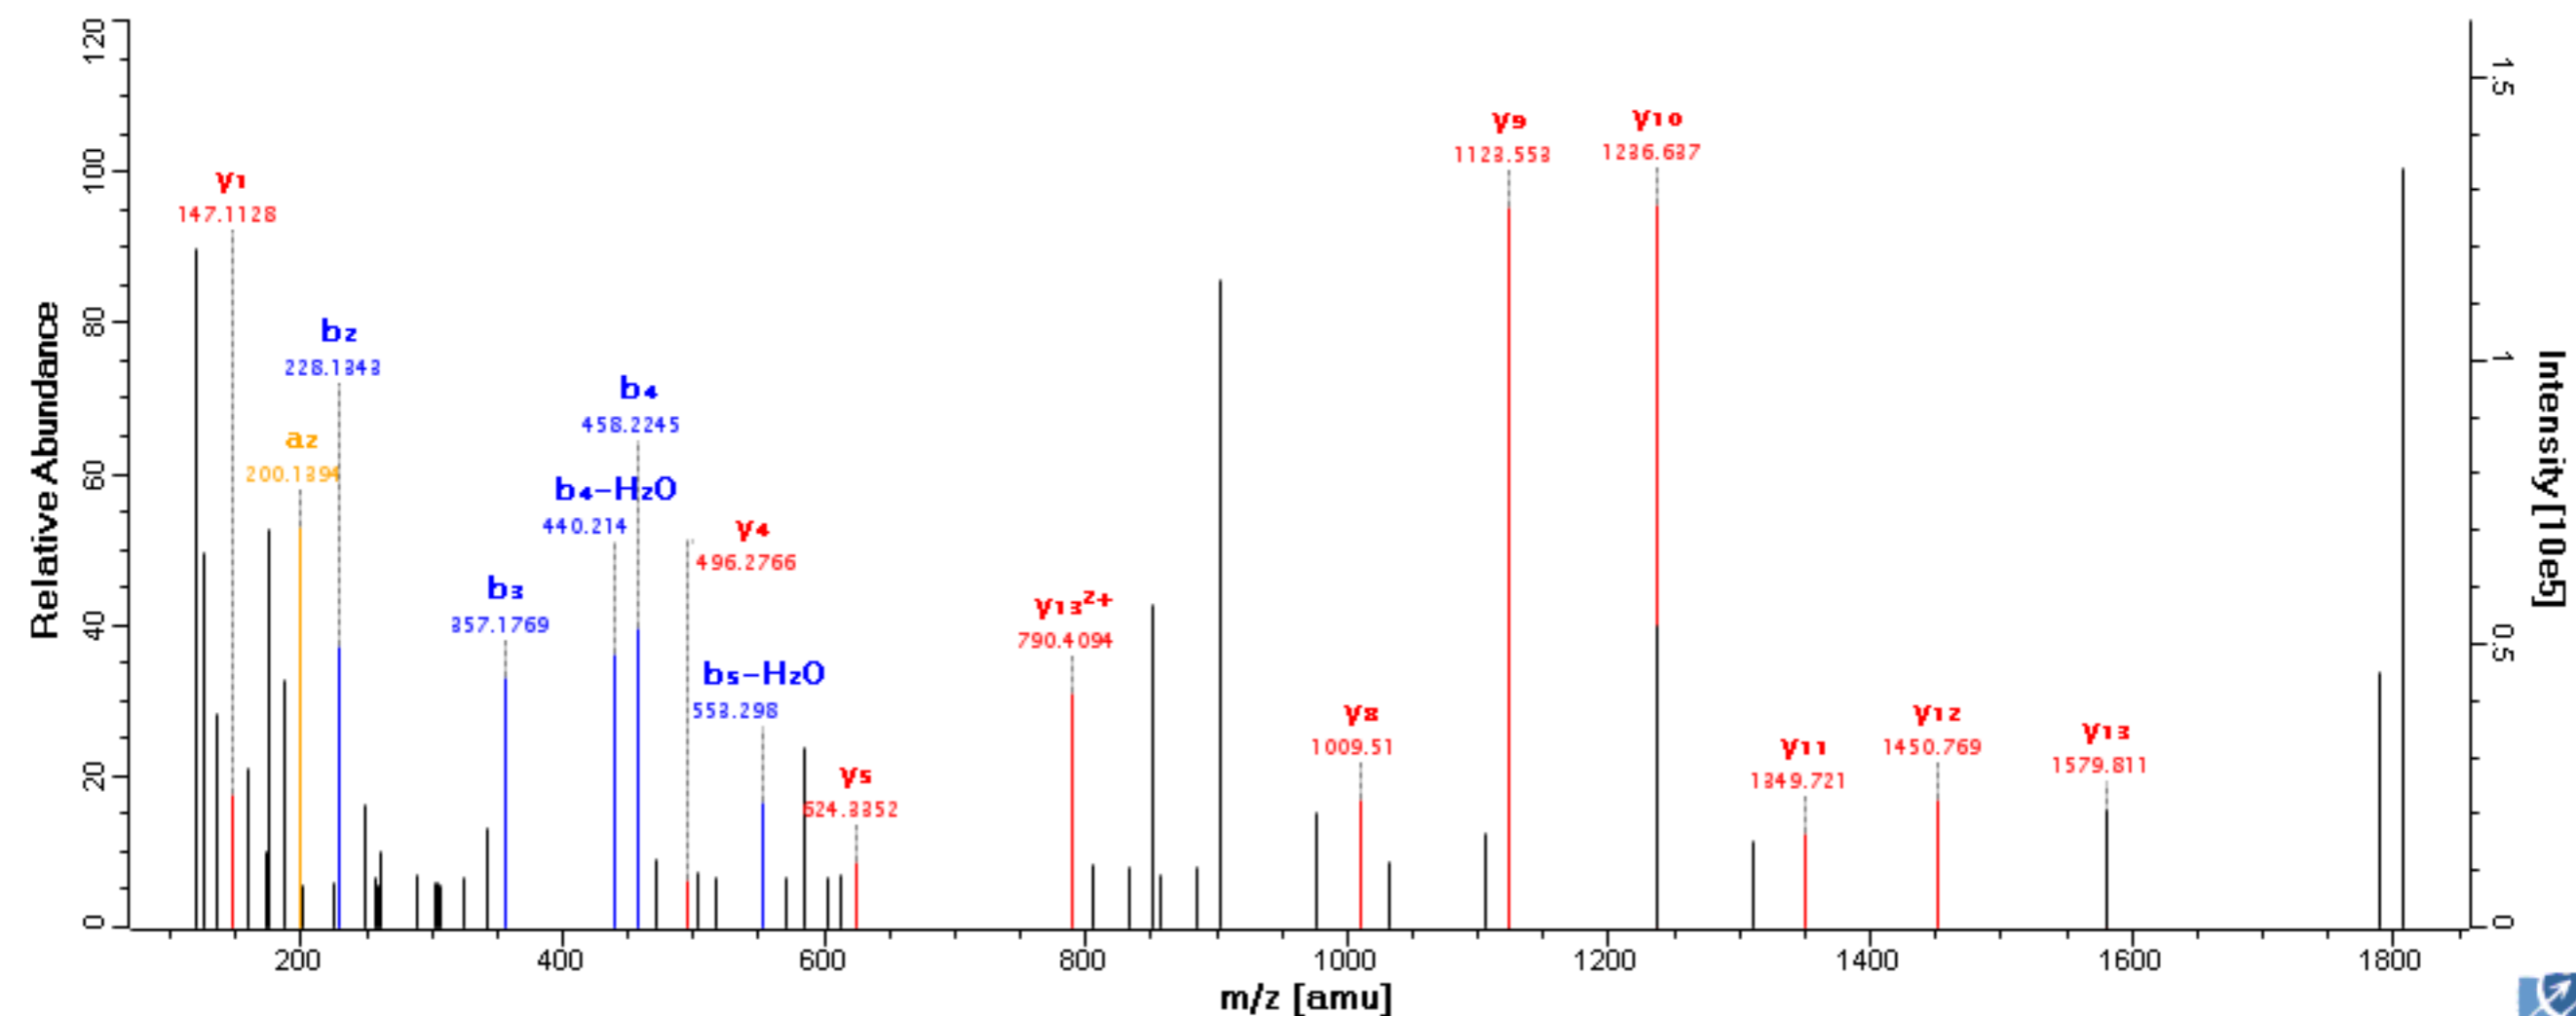

Source: Bibo\_20130531\_RM\_MSC07626\_1\_3

Scannumber: 46311

Protein: STX3; STX3A; hCG\_40920; DKFZp686L1857; hCG\_40920; STX3A; STX3; STX3A; Q13277-1; Q13277; Q53YE2; Q7Z338; B4DME0; E9PN33; Q13277-2; Q13277

Peptide Score: 95.4

Method: FTMS; HCD; 1

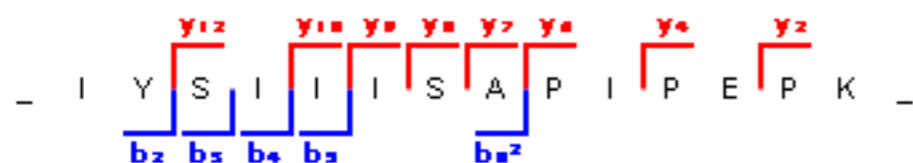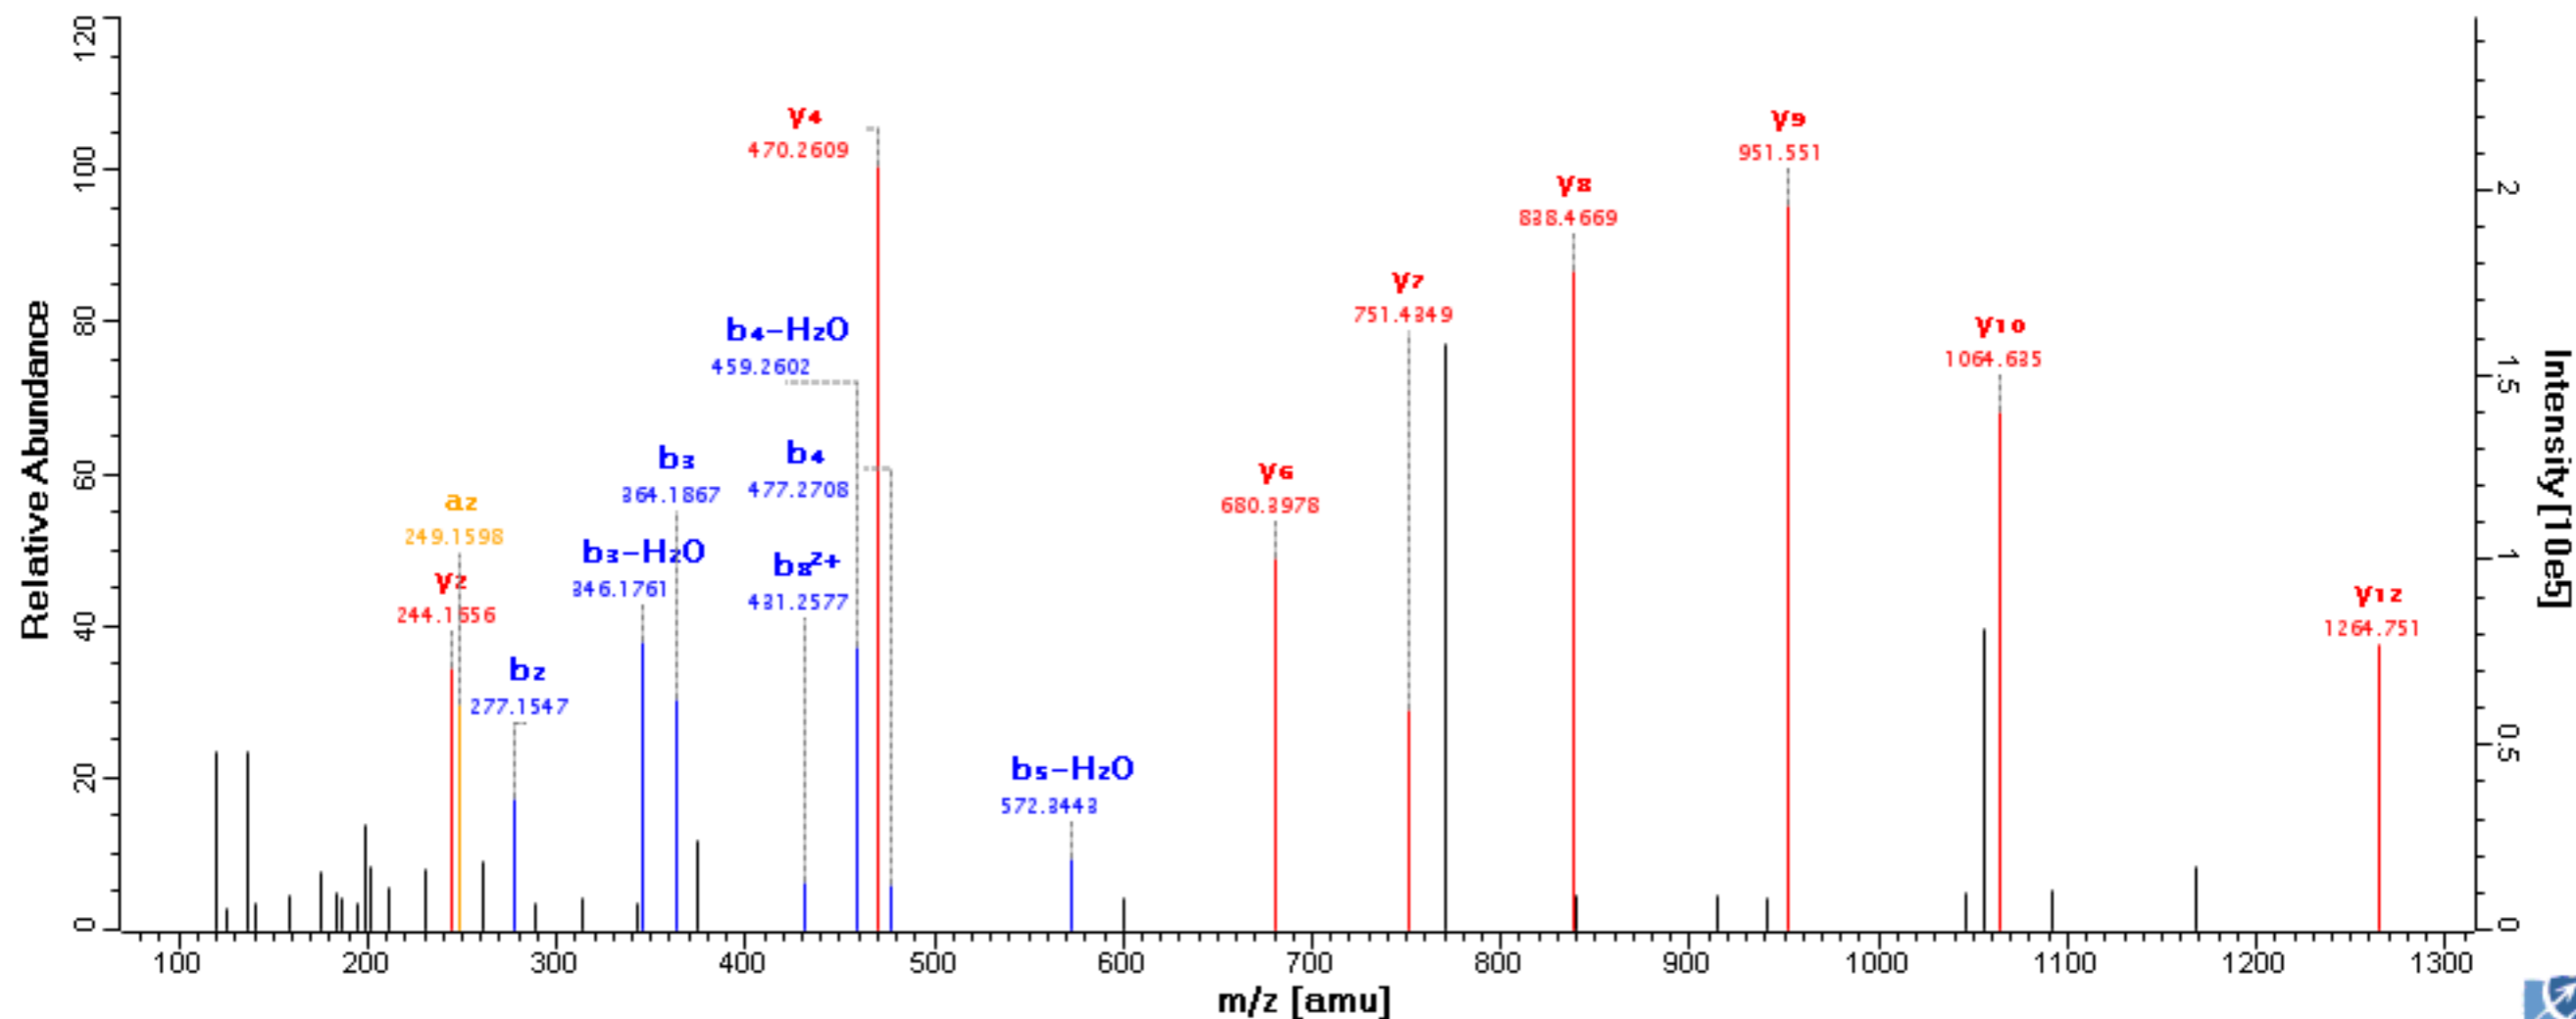

Source: Bibo\_20130531\_RM\_MSC07626\_1\_3

Scannumber: 48327

Protein: SAKS1; UBXN1; SAKS1; UBXN1; hCG\_1818009; LOC51035; UBXN1; Q04323-2; Q04323; Q04323-1; Q04323; E9PRQ7; B4DNC6; E9PJ81; Q05BV2; B4EOP8

Peptide Score: 150.59

Method: FTMS; HCD; 1

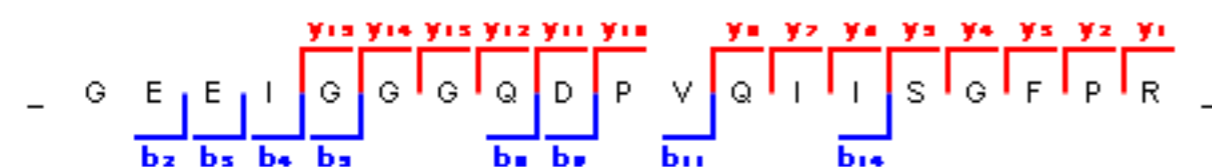

Source: Bibo\_20130531\_RM\_MSC07626\_1\_3  
 Scannumber: 49550  
 Protein: GCDFP15; GPI4; PIP; P12273  
 Peptide Score: 96.59  
 Method: FTMS; HCD; 1

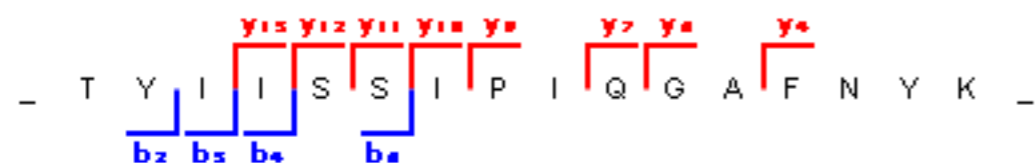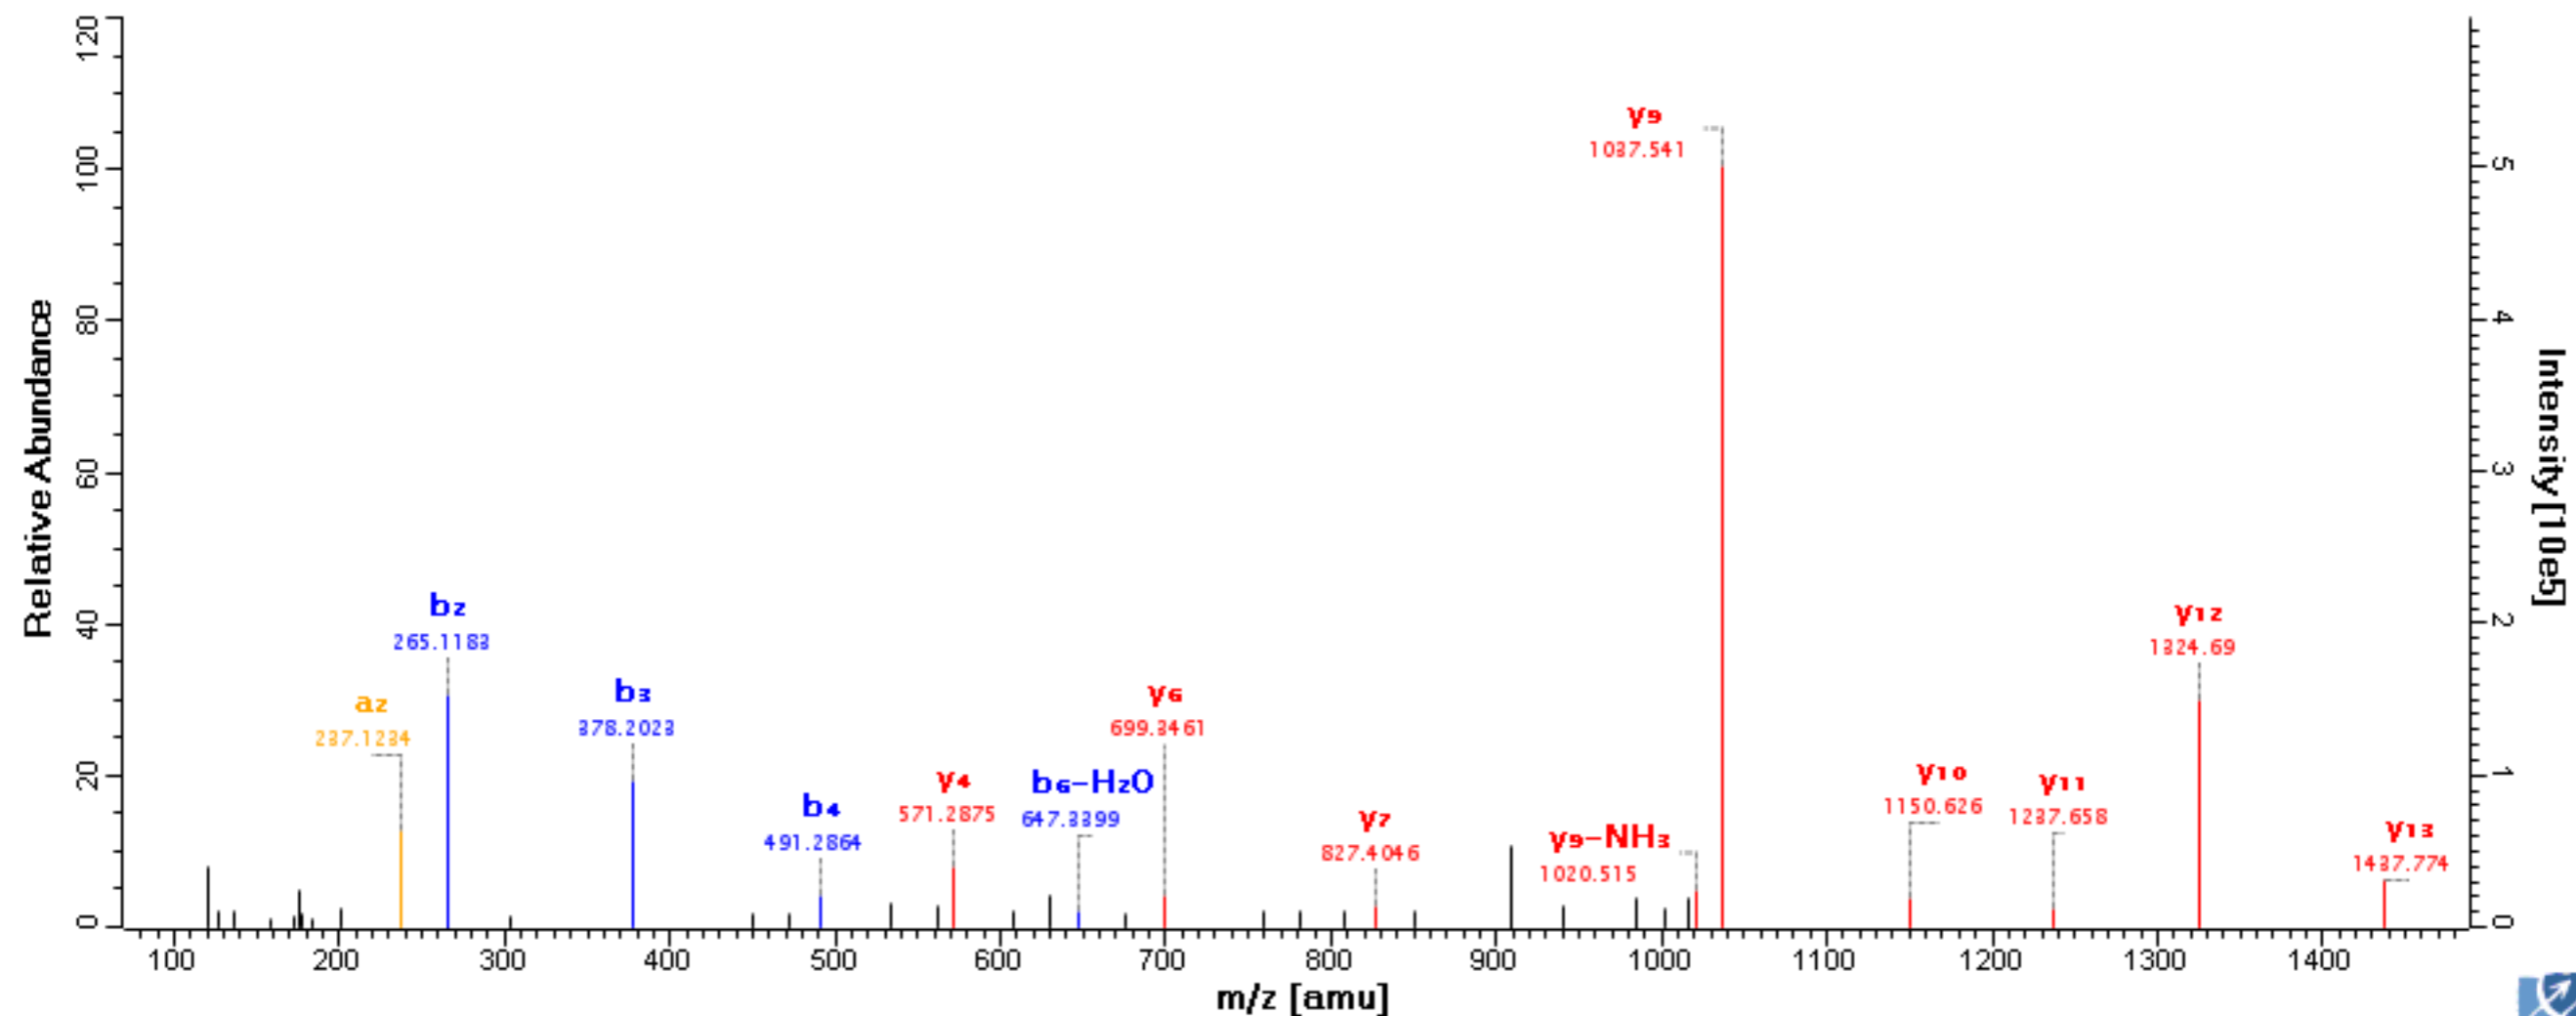

Source: Bibo\_20130531\_RM\_MSC07626\_1\_3  
 Scannumber: 52330  
 Protein: CAPR; CTNNA2; CAPR; CTNNA2; CAPR; CTNNA2; CAPR; CTNNA2; CTNNA2; P26232-1; P26232; P26232-5; P26232; P26232-2; P26232; Q49AD3; P26232-3; P26232; C9IZ88; C9IJ144  
 Peptide Score: 78.29  
 Method: FTMS; HCD; 1

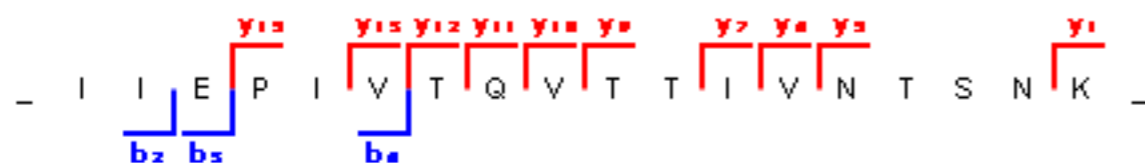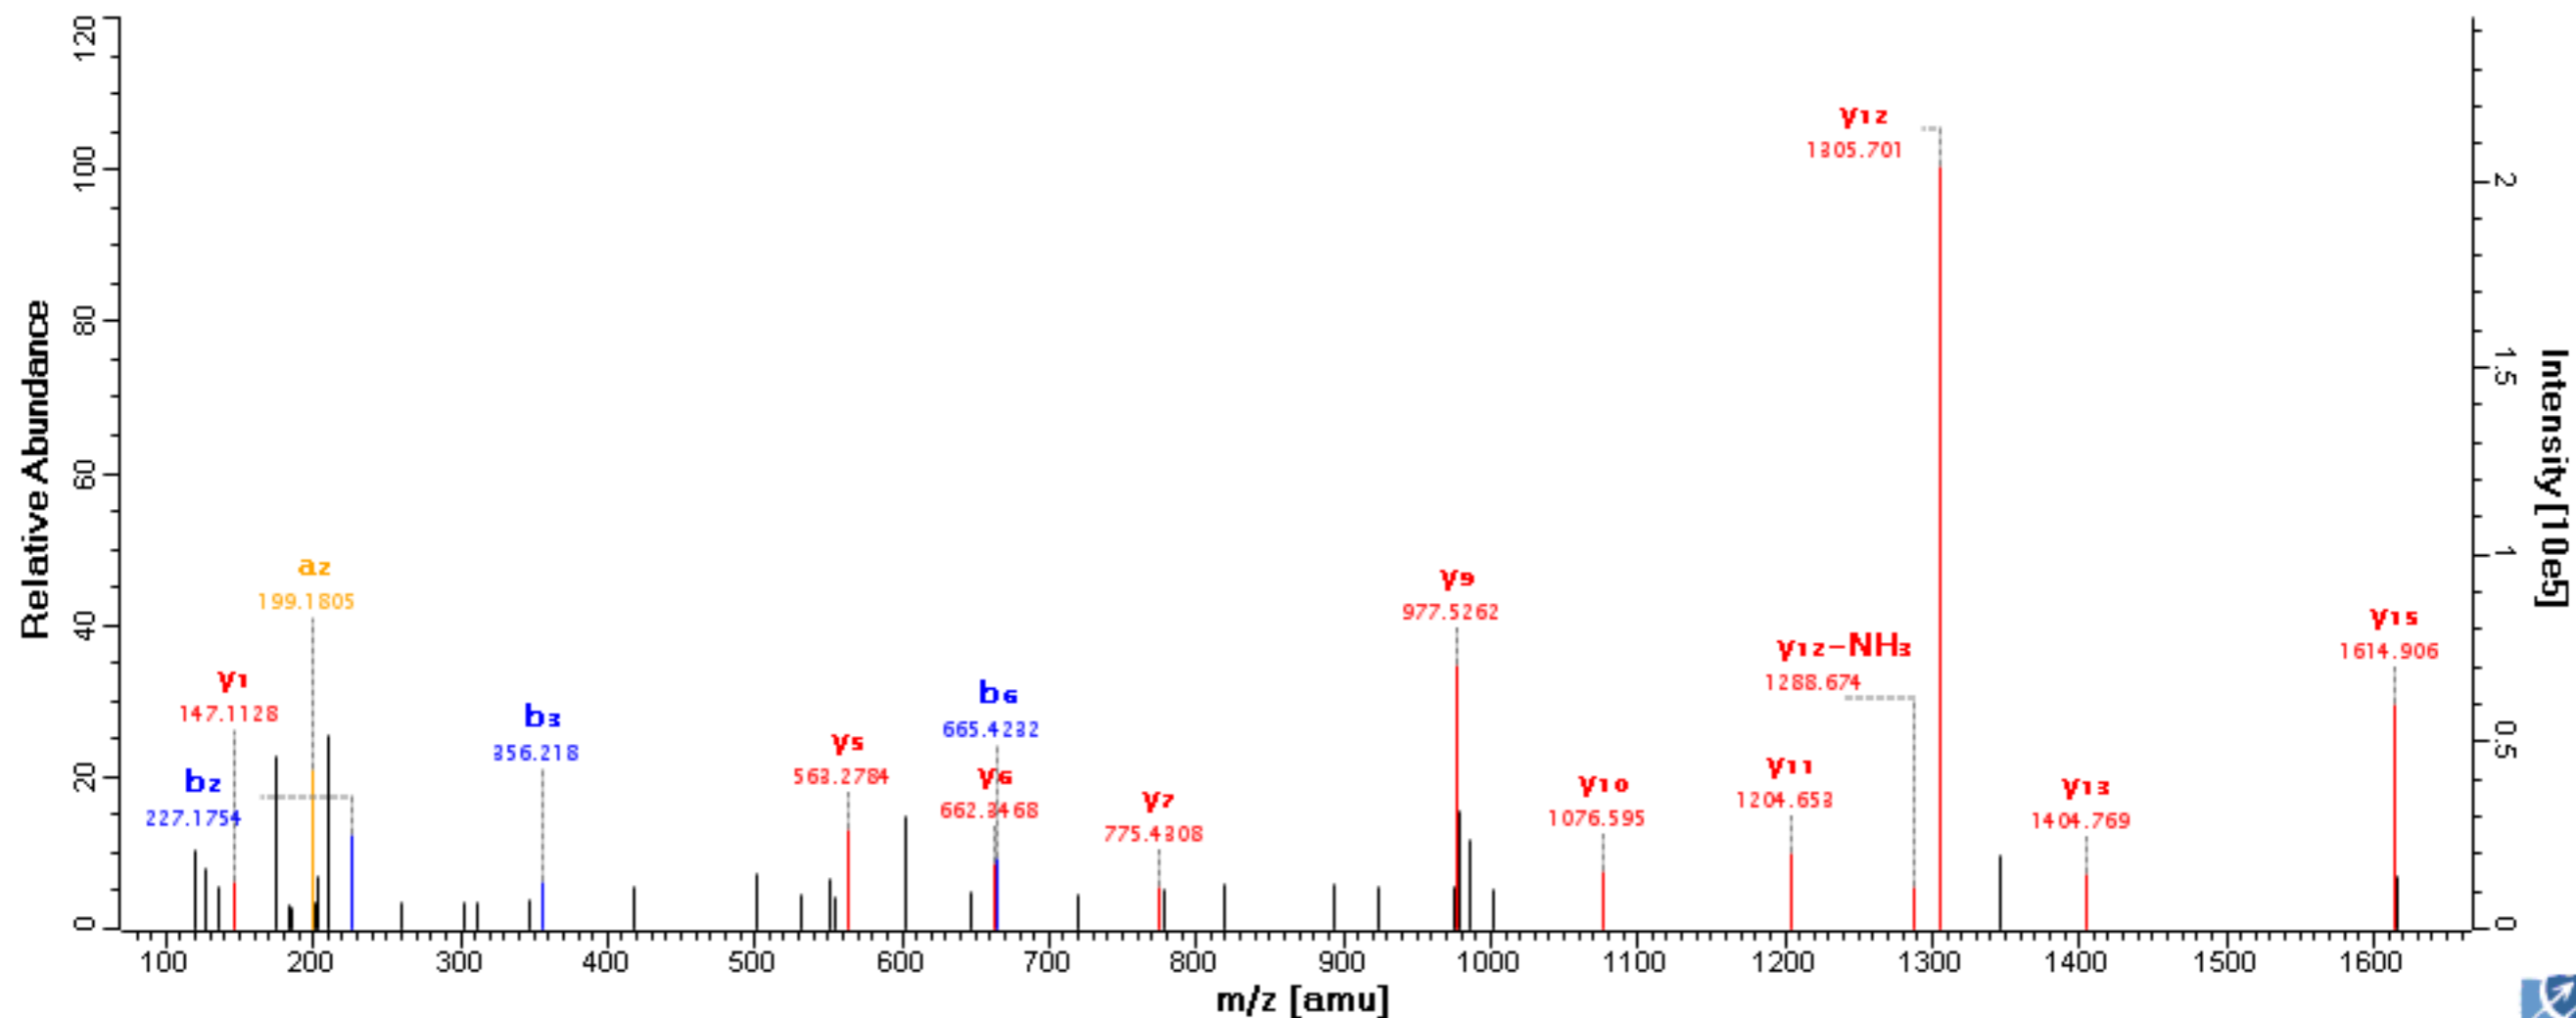

Source: Bibo\_20130531\_RM\_MSC07626\_1\_3  
Scannumber: 53661  
Protein: EAAT2; GLT1; SLC1A2; EAAT2; GLT1; SLC1A2; AL133330.2-002; hCG\_26509; P43004-1; P43004; B4DQE9; Q59FL6; P43004-2; P43004; A2A2U1  
Peptide Score: 2.15  
Method: FTMS; HCD; 1

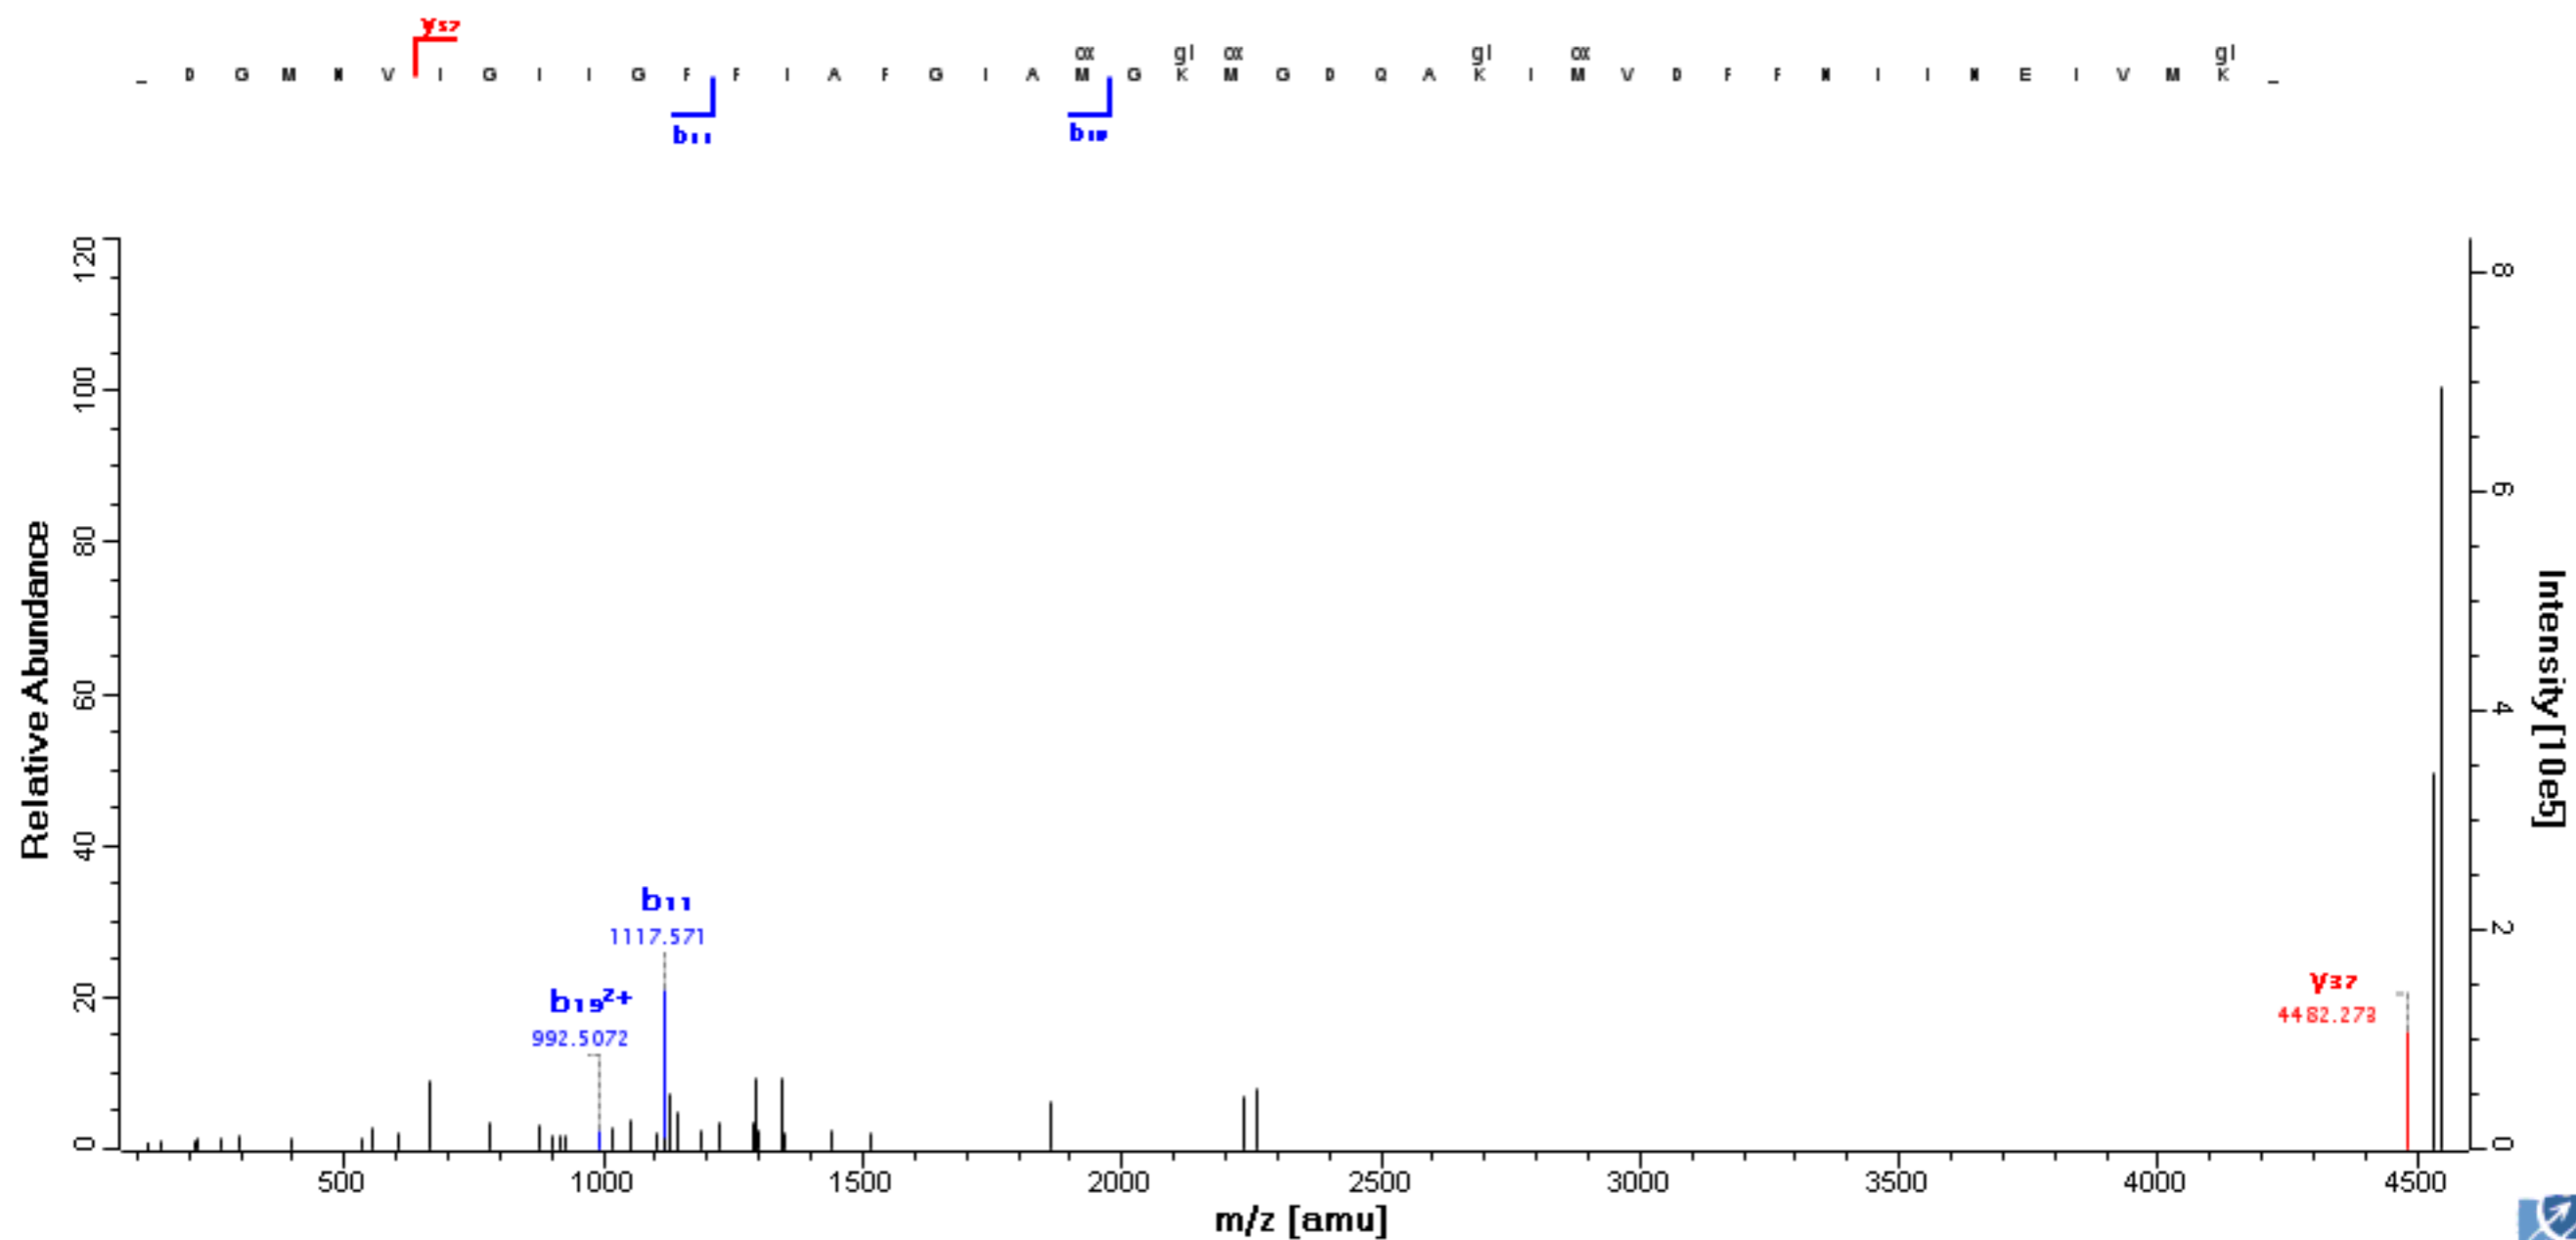

Source: Bibo\_20130531\_RM\_MSC07626\_1\_3  
 Scannumber: 53724  
 Protein: NPM; NPM1; NPM1; NPM1; P06748-1; P06748; A4ZU86; Q9BT19; P06748-2; P06748; Q9BYG9; Q9NX34; E5RI98  
 Peptide Score: 124.26  
 Method: FTMS; HCD; 1

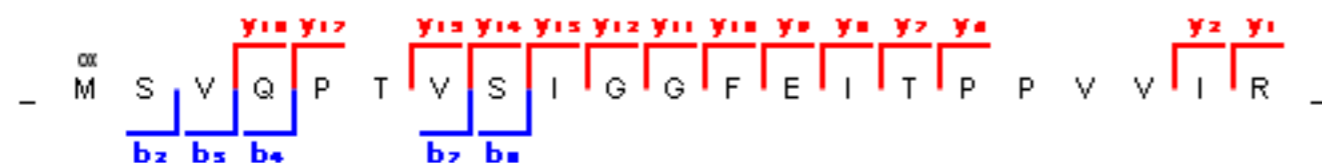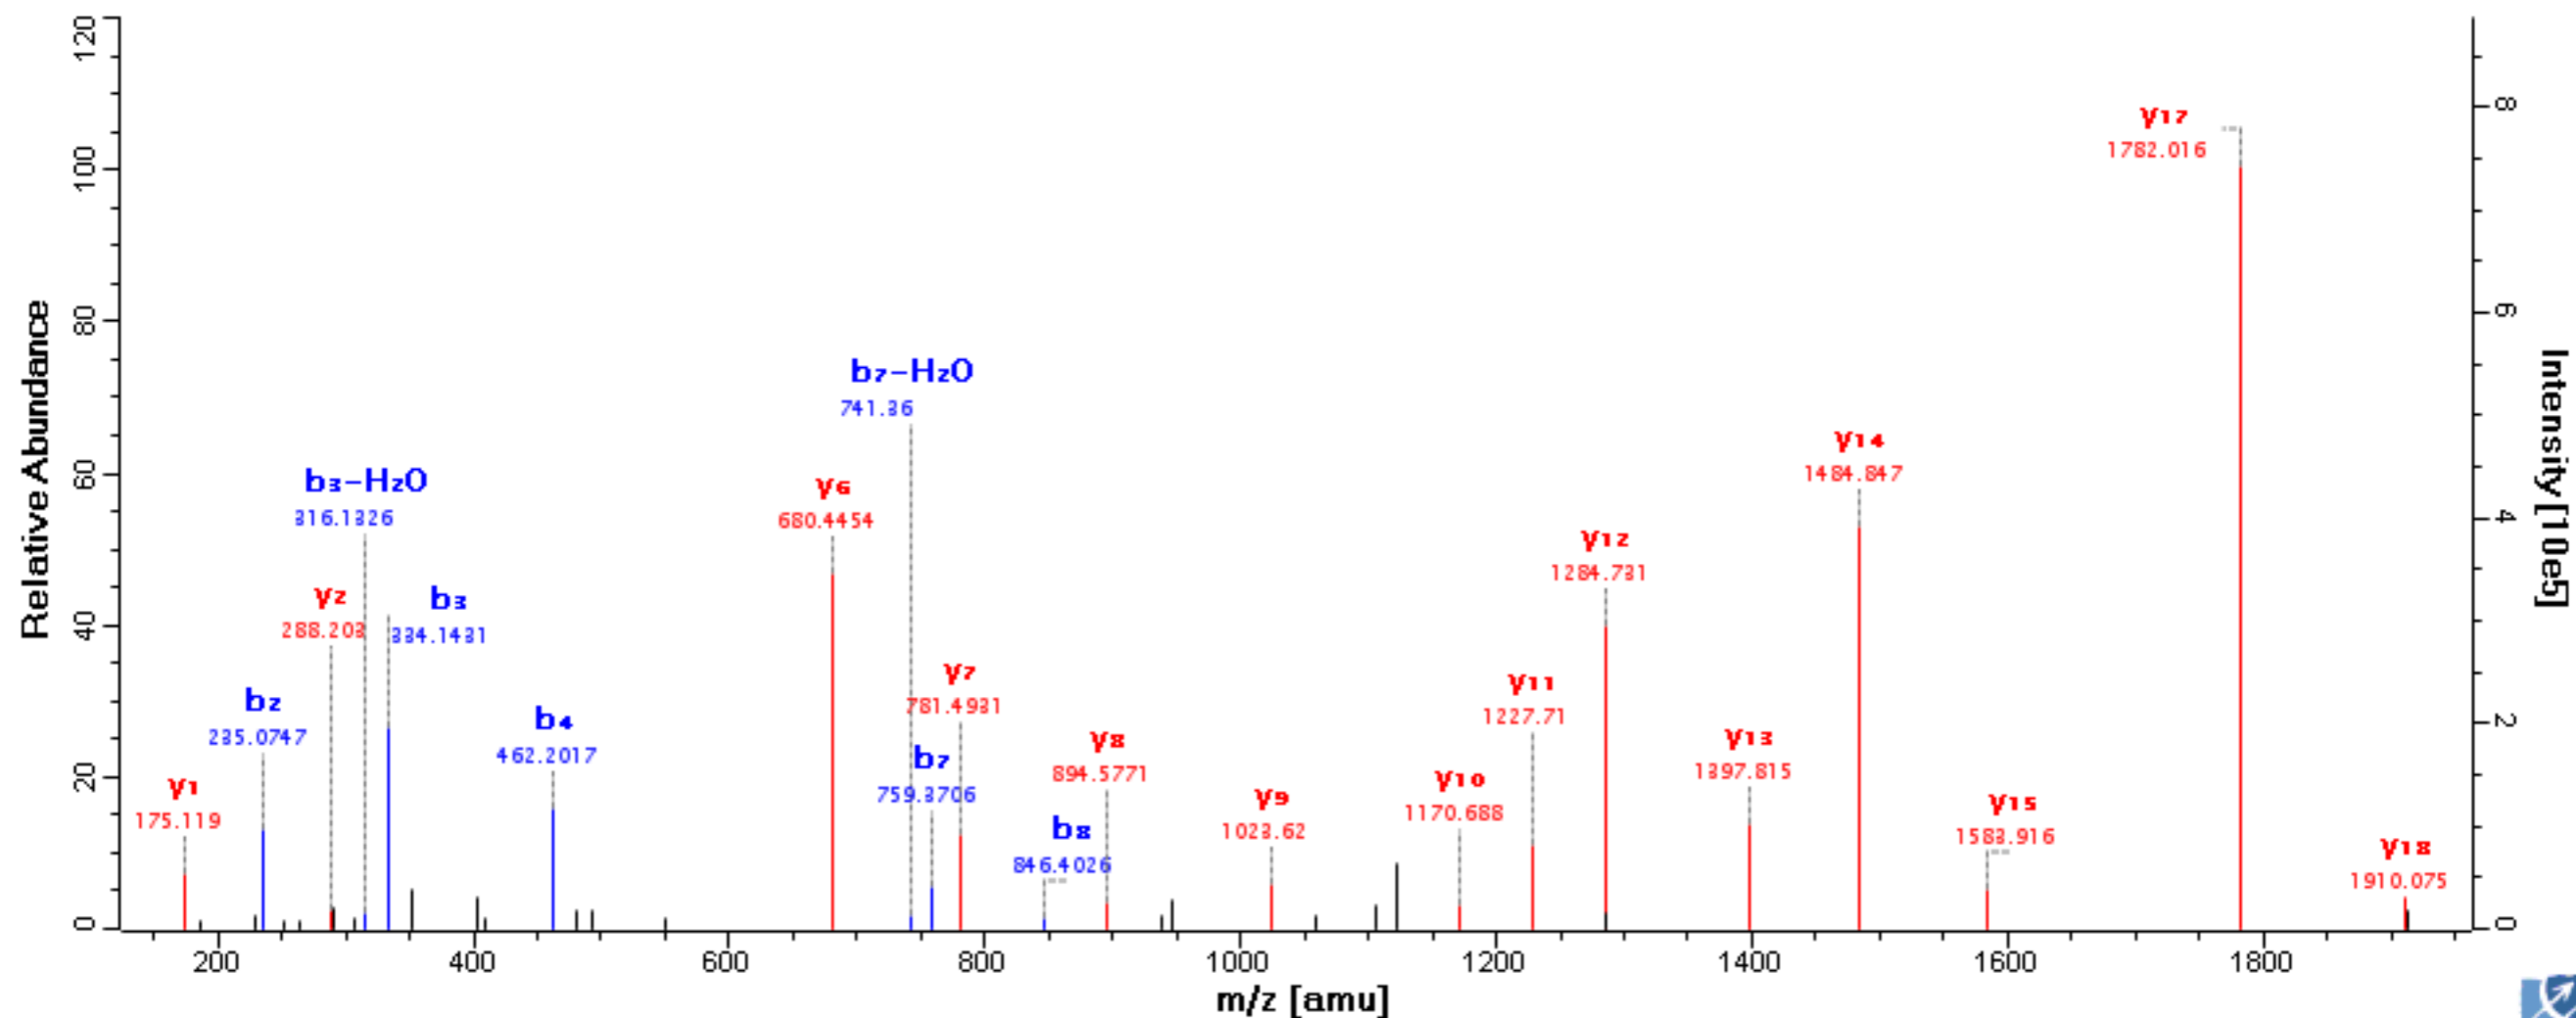

Source: Bibo\_20130531\_RM\_MSC07626\_1\_3  
 Scannumber: 54798  
 Protein: P02666  
 Peptide Score: 70.24  
 Method: FTMS; HCD; 1

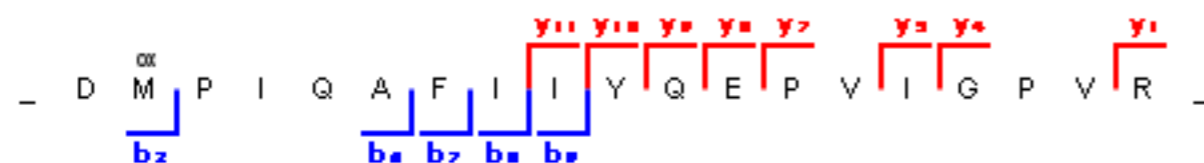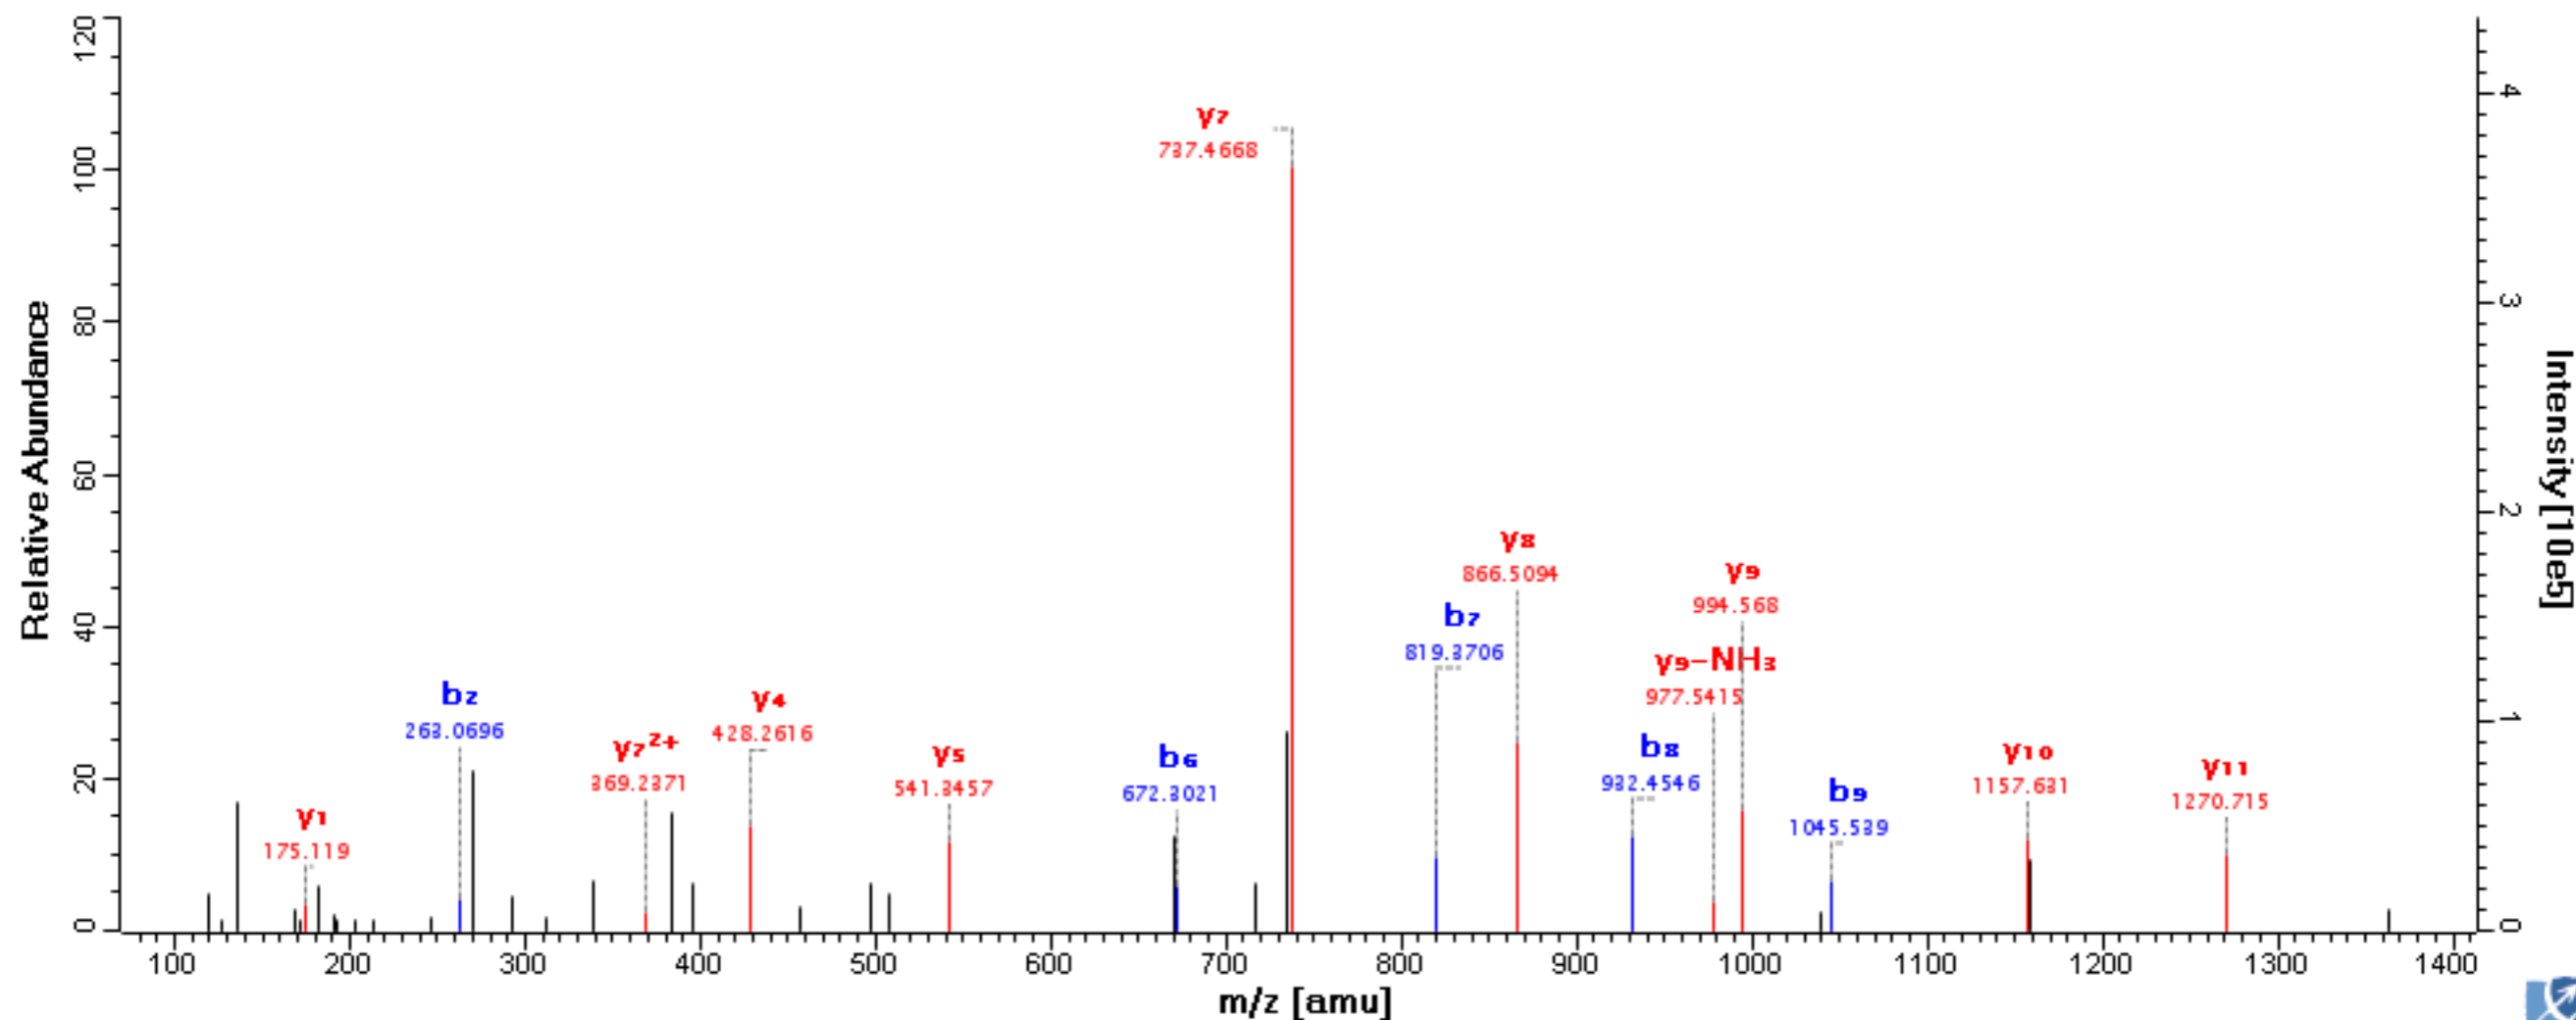

Source: Bibo\_20130531\_RM\_MSC07626\_1\_3  
 Scannumber: 54799  
 Protein: P02666  
 Peptide Score: 119.4  
 Method: FTMS; HCD; 1

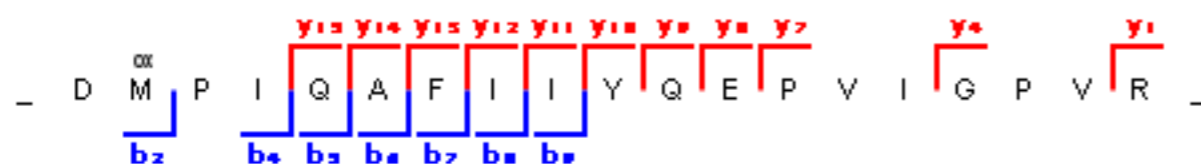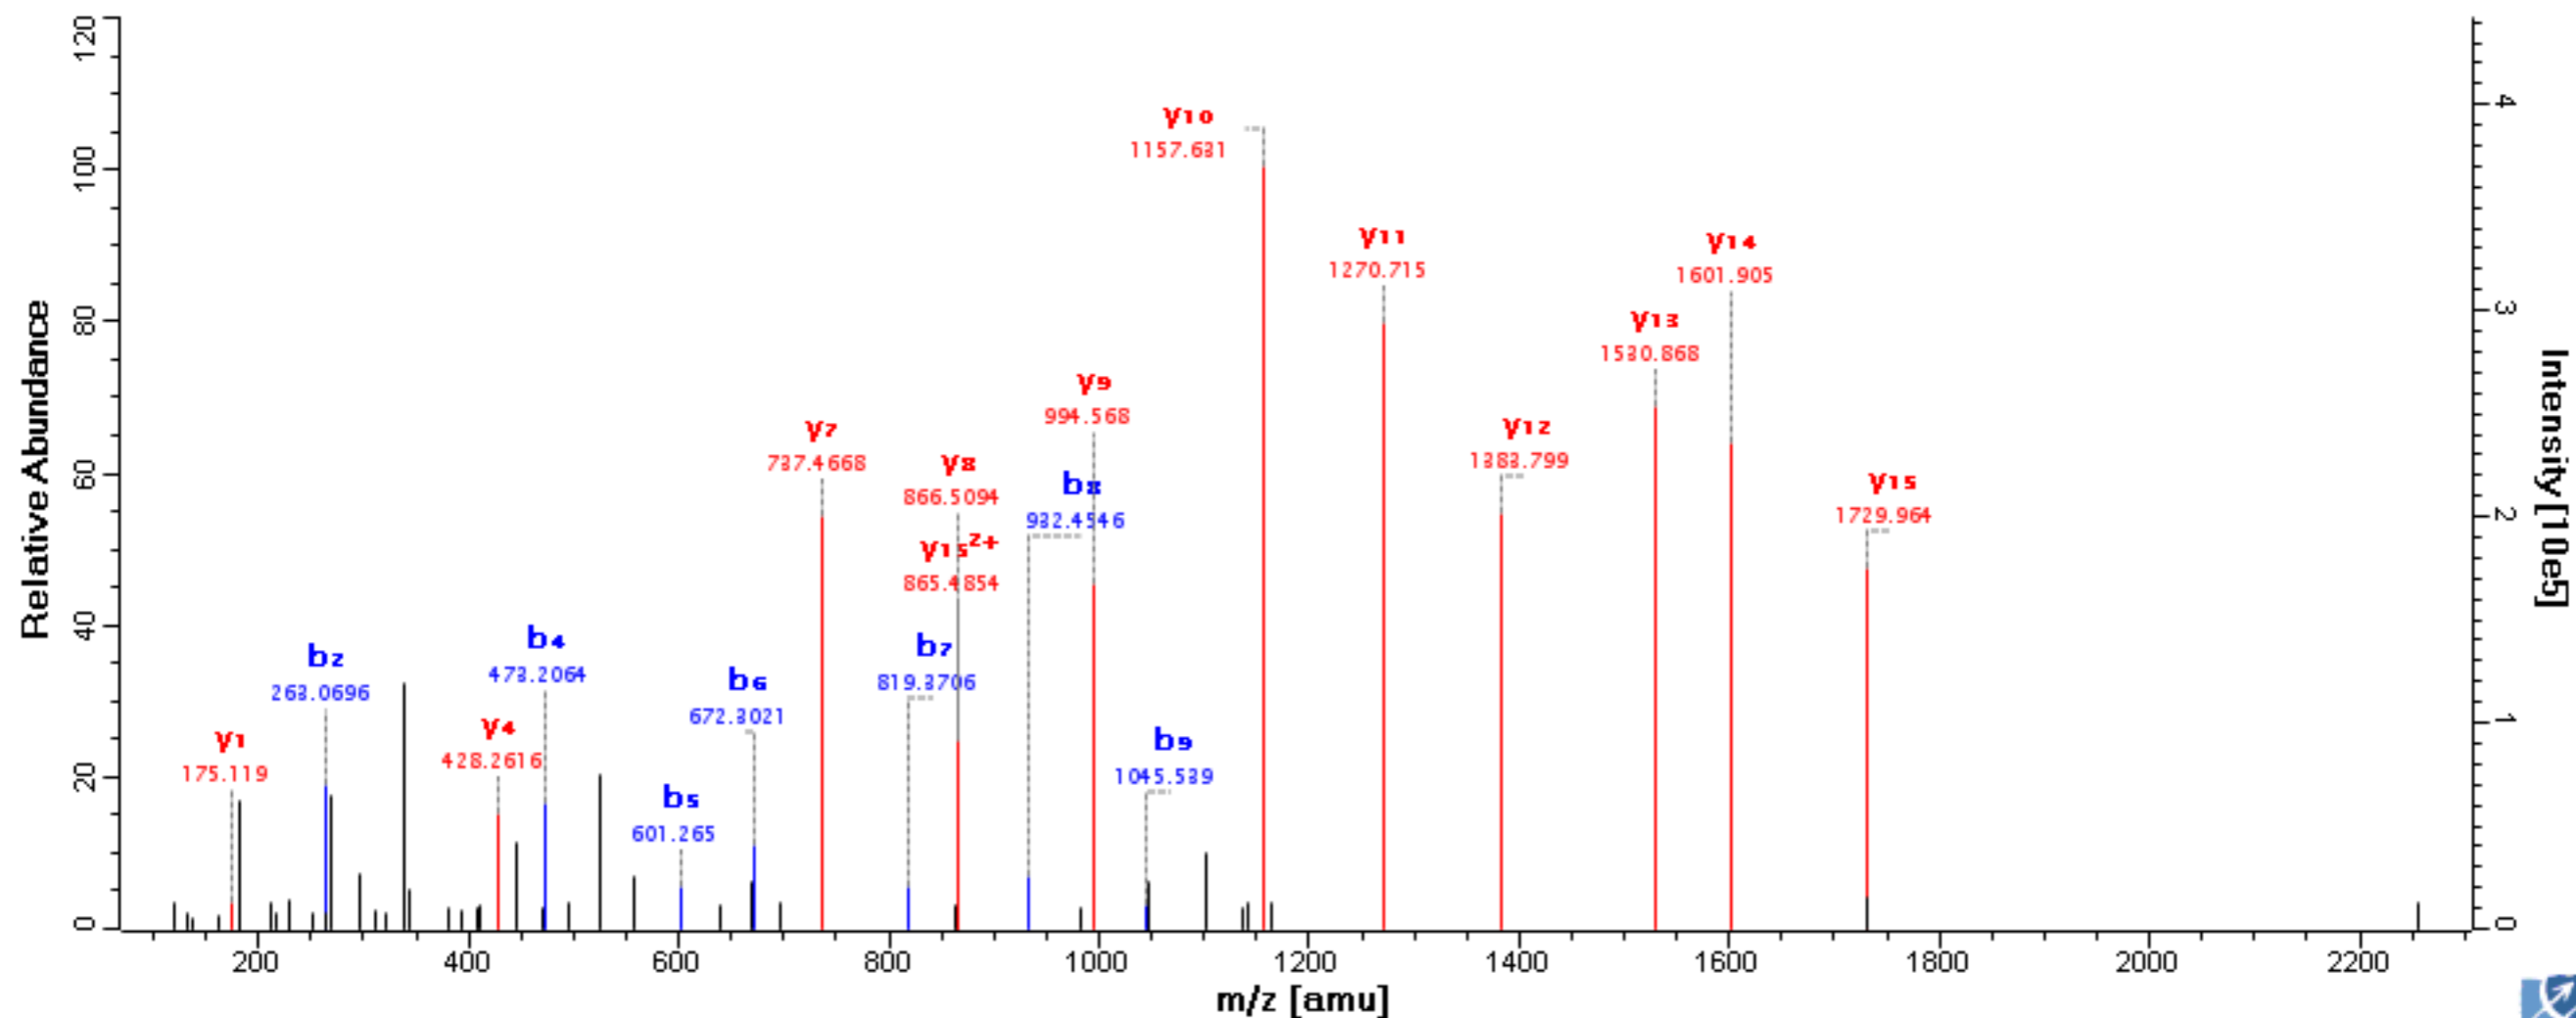

Source: Bibo\_20130531\_RM\_MSC07626\_4  
 Scannumber: 3343  
 Protein: E9PBV3  
 Peptide Score: 92.58  
 Method: FTMS; HCD; 1

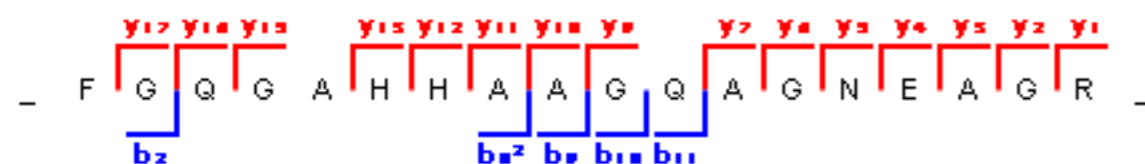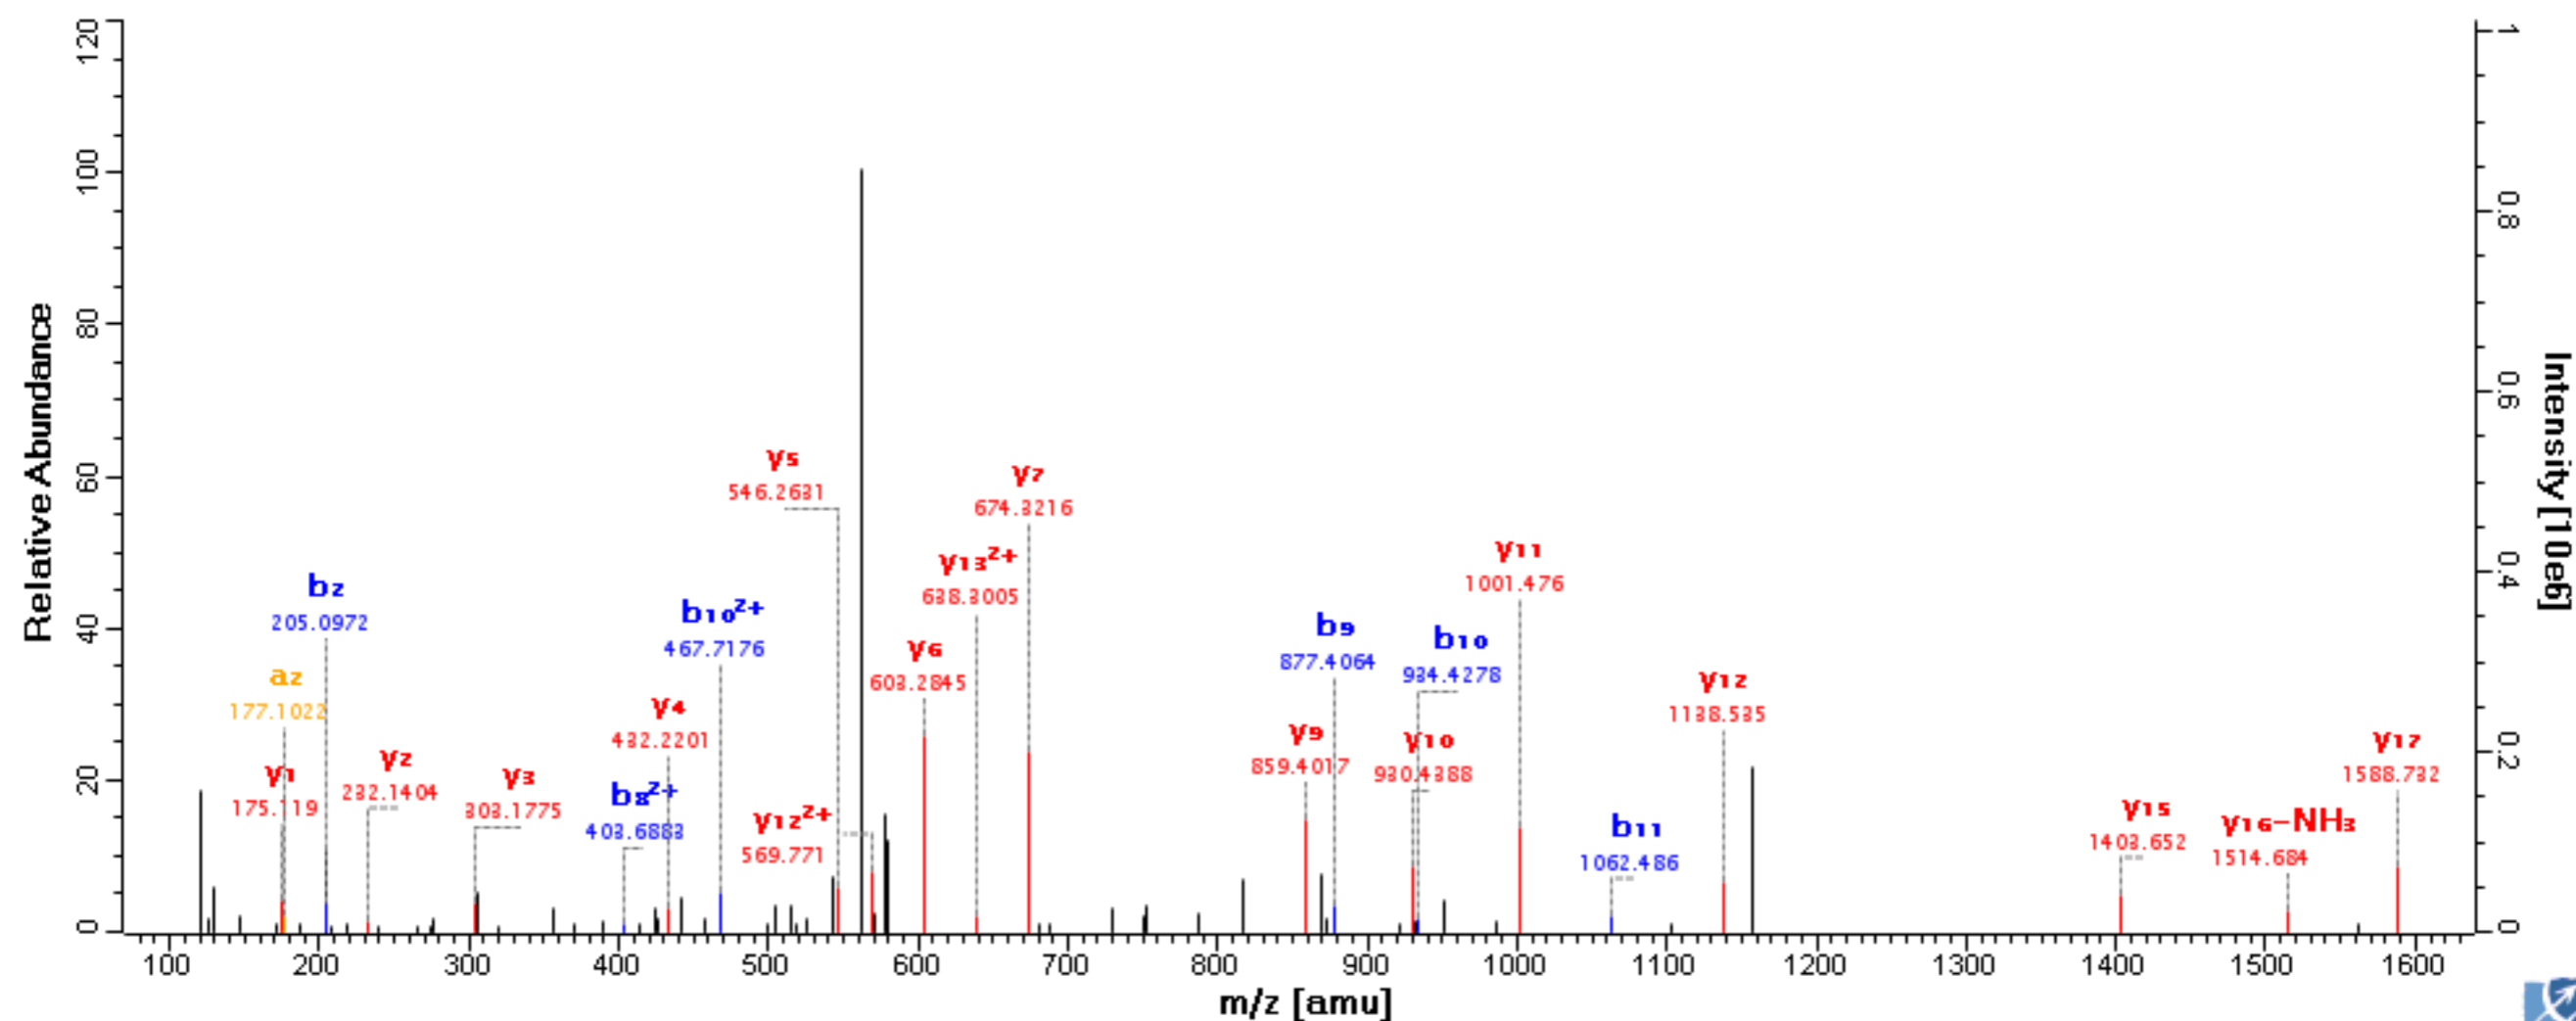

Source: Bibo\_20130531\_RM\_MSC07626\_4  
 Scannumber: 11789  
 Protein: CRYBG3; CRYBG3; Q68DQ2-1; Q68DQ2; Q68DQ2-2; Q68DQ2; C9J5N2; C9J659  
 Peptide Score: 89.54  
 Method: FTMS; HCD; 1

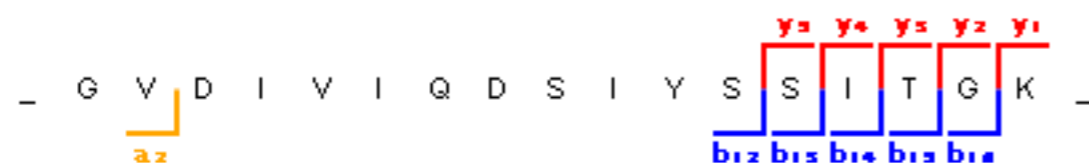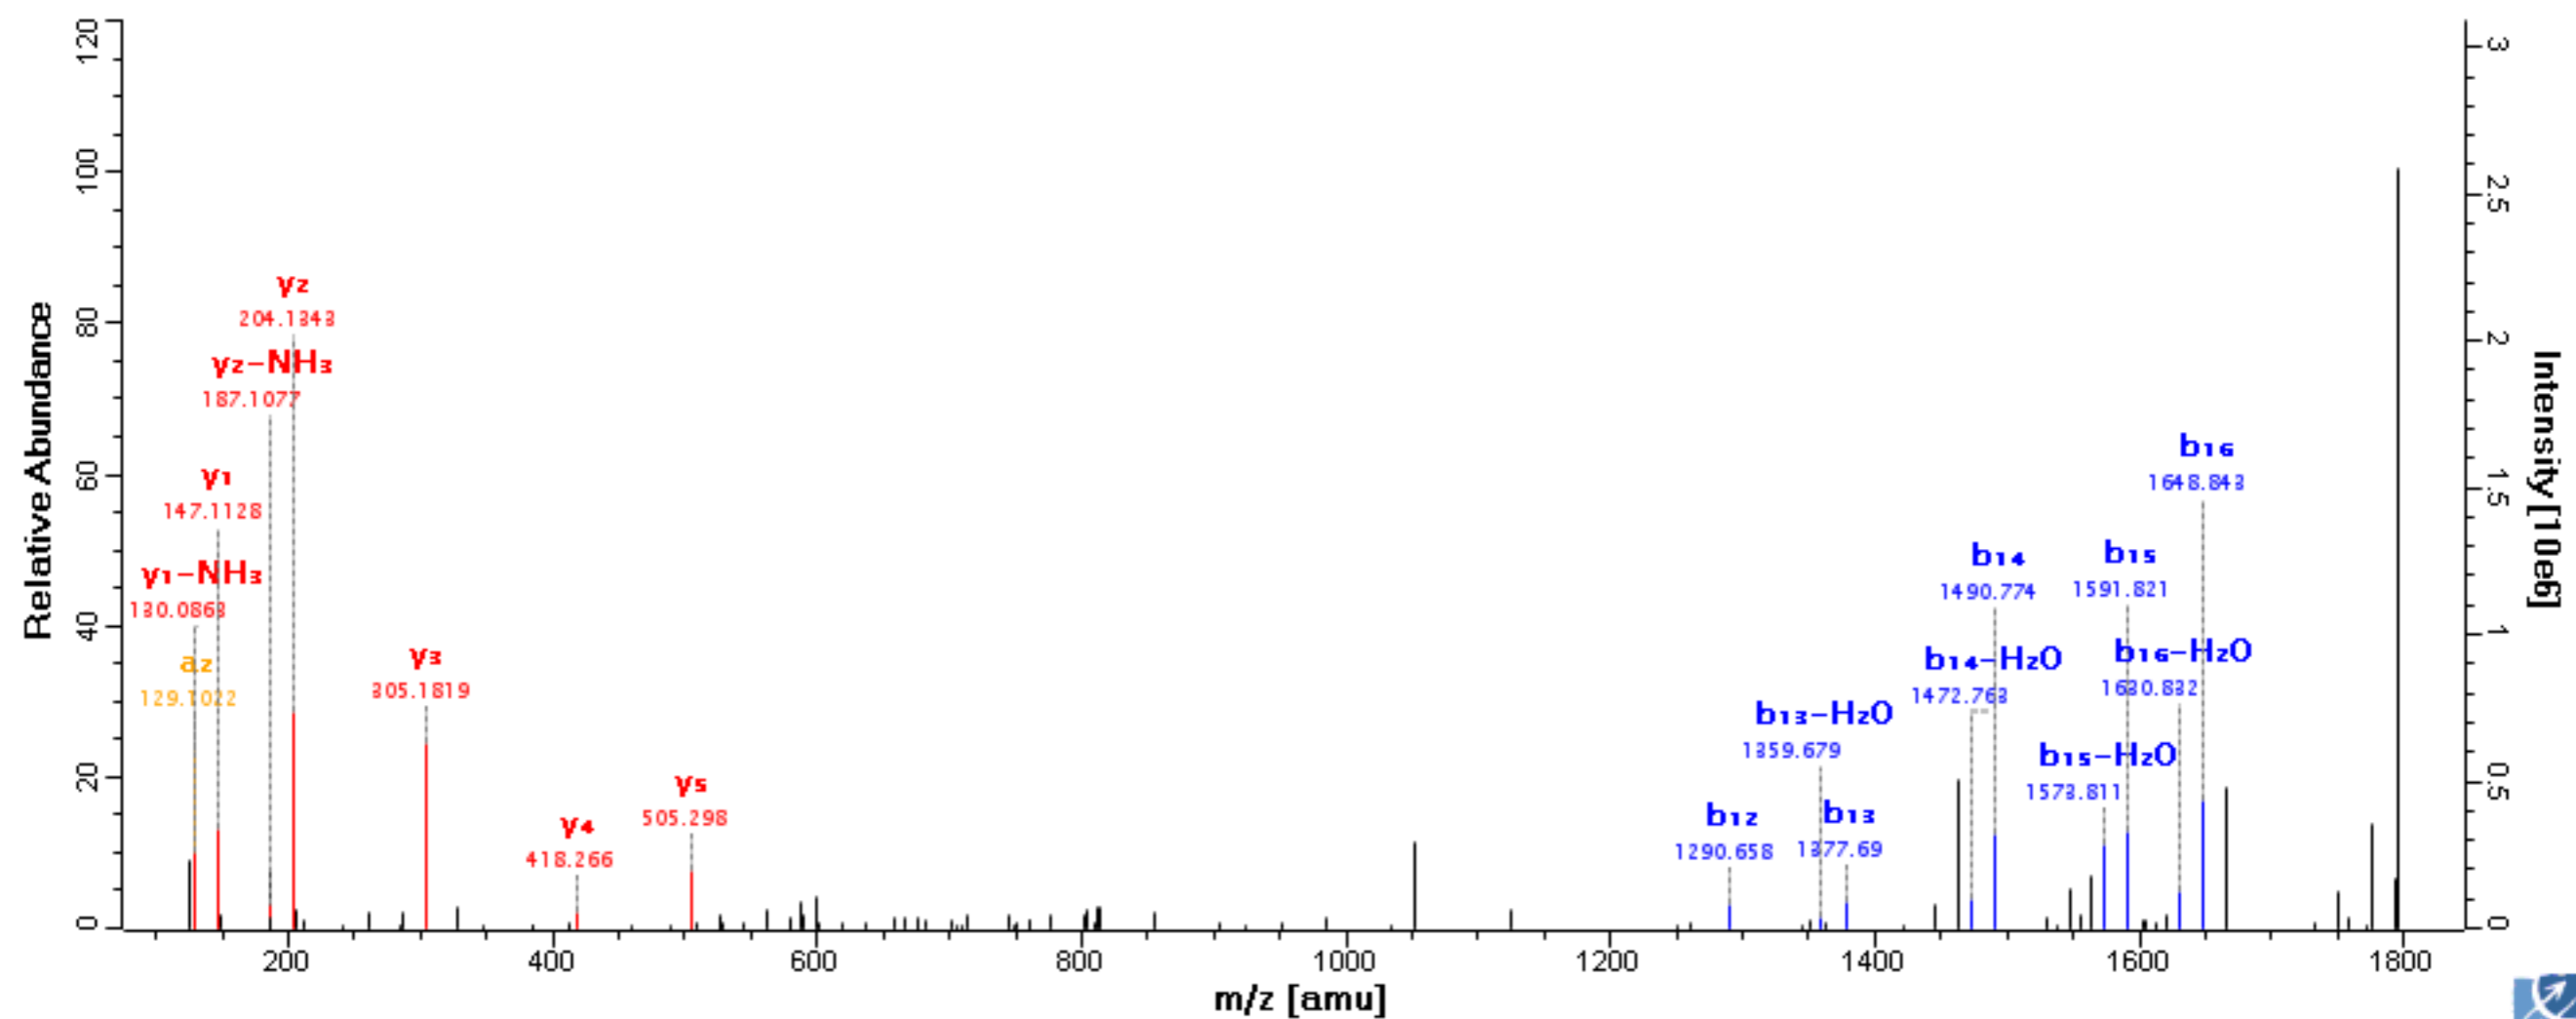

Source: Bibo\_20130531\_RM\_MSC07626\_4  
 Scannumber: 14578  
 Protein: E5RG04  
 Peptide Score: 99.75  
 Method: FTMS; HCD; 1

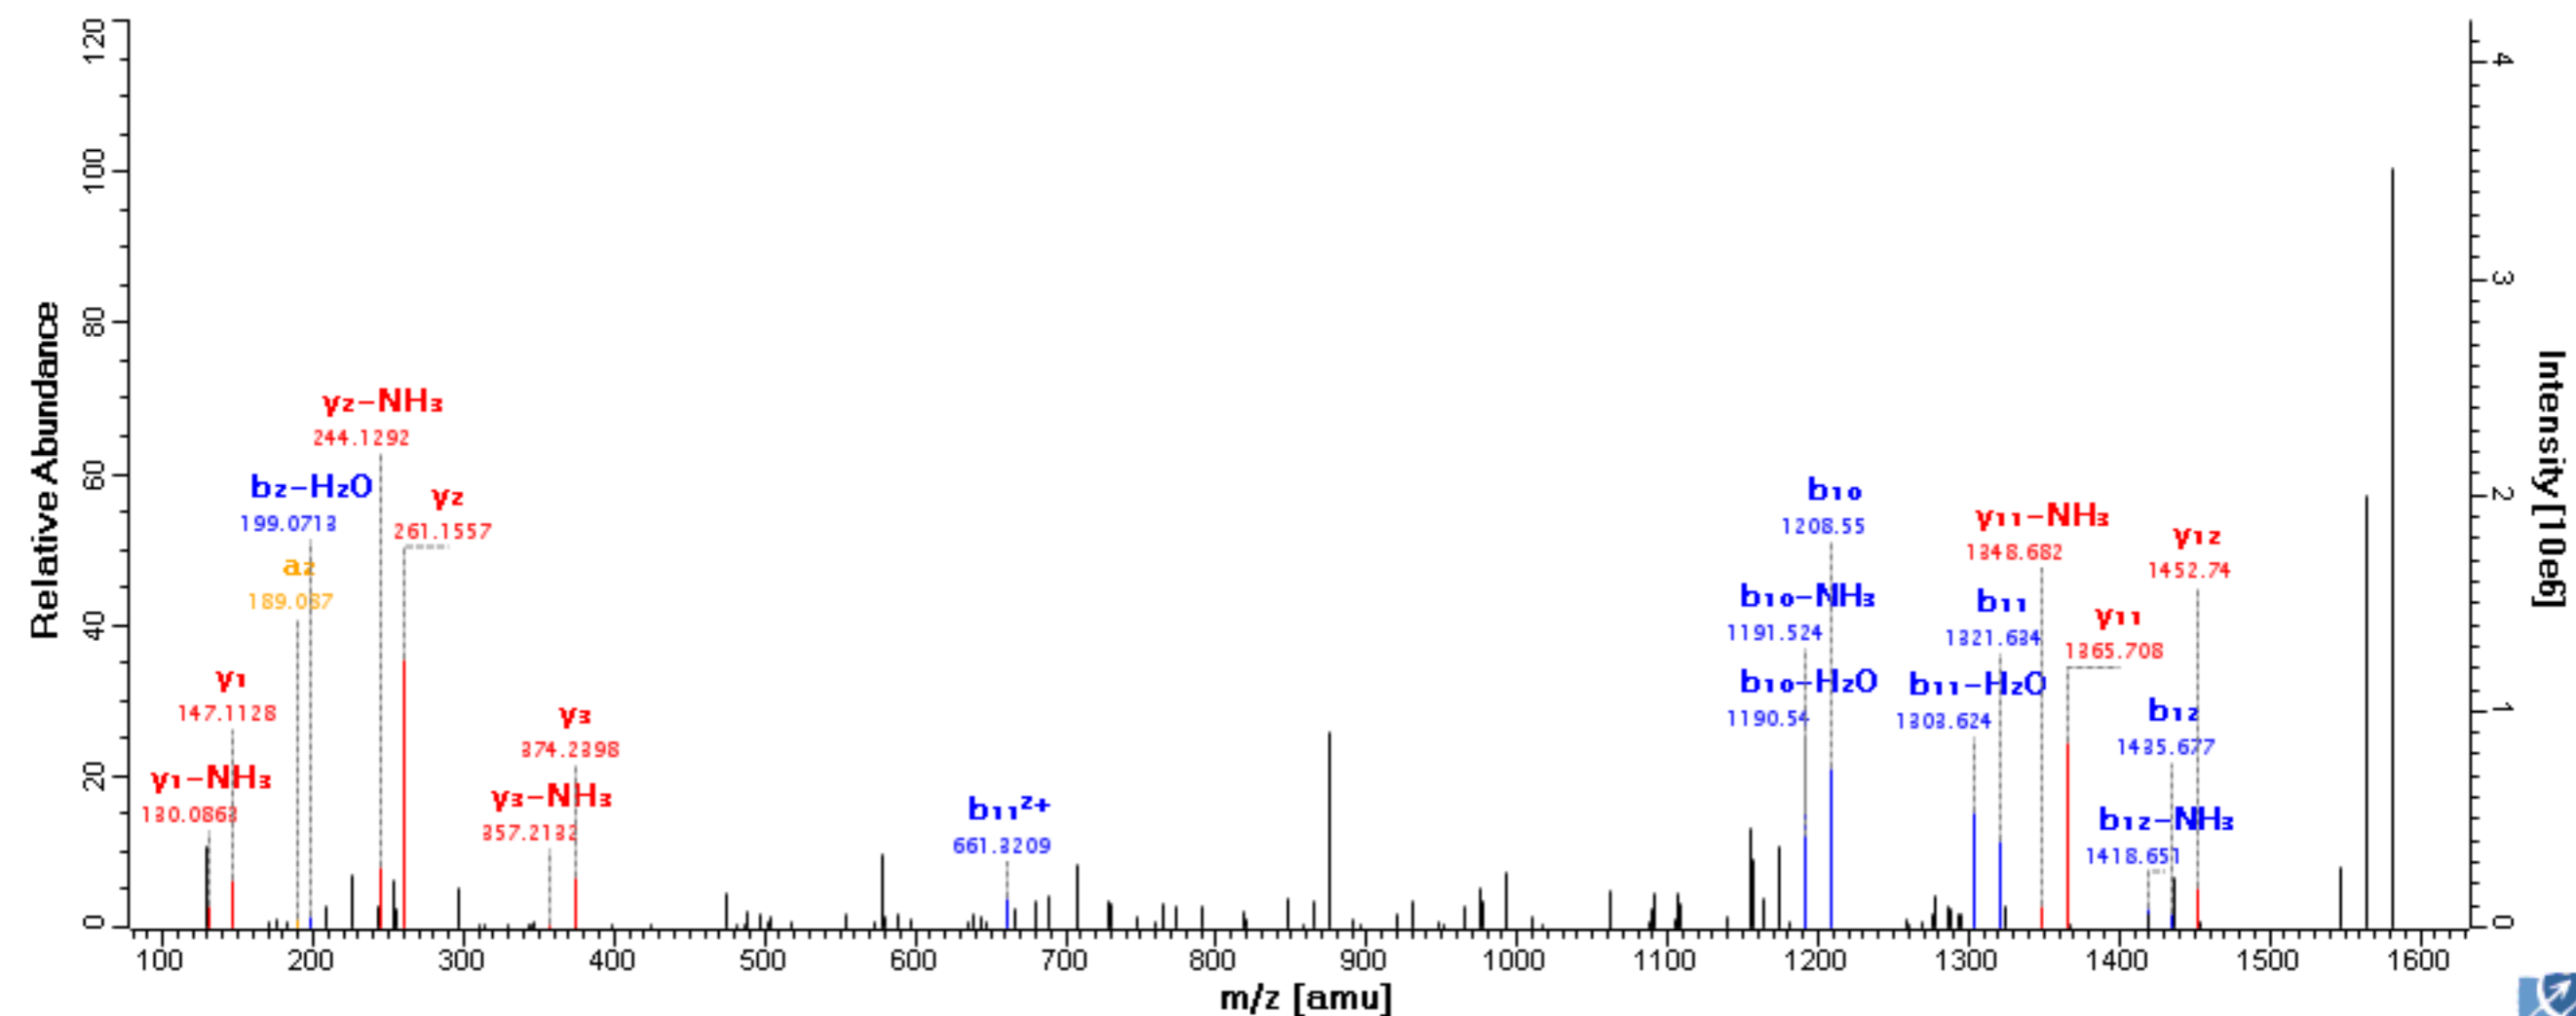

Source: Bibo\_20130531\_RM\_MSC07626\_4  
 Scannumber: 15180  
 Protein: E5RG04  
 Peptide Score: 99.54  
 Method: FTMS; HCD; 1

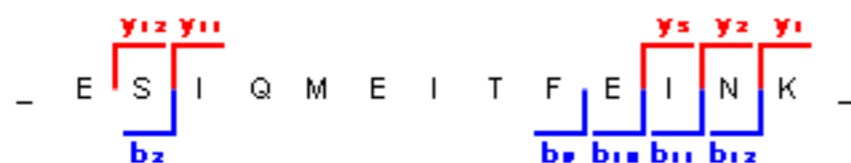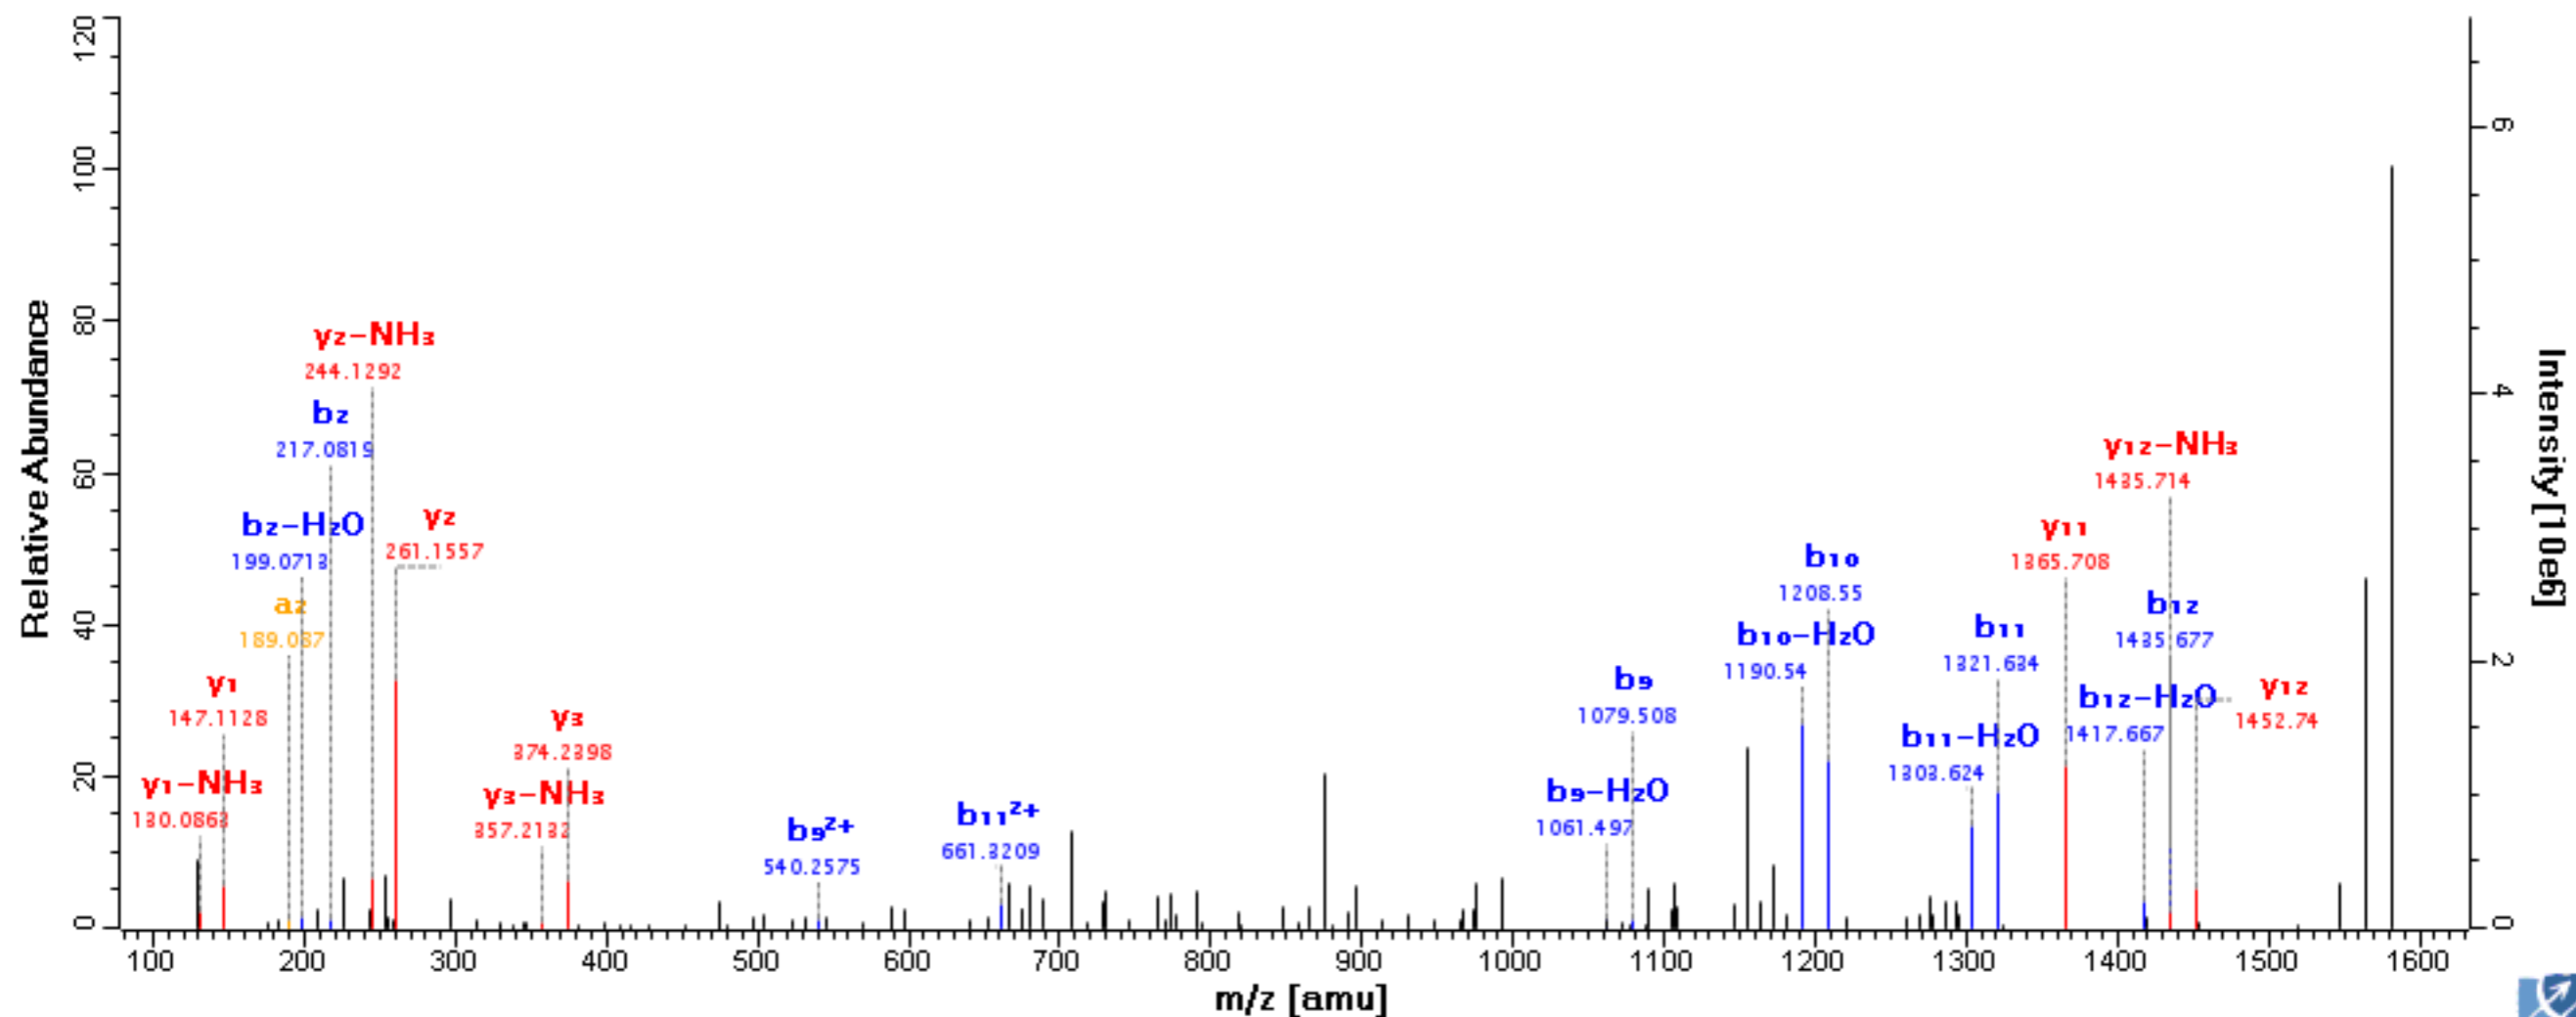

Source: Bibo\_20130531\_RM\_MSC07626\_4

Scannumber: 15412

Protein: UBCH5C; UBE2D3; UBCH5C; UBE2D3; P61077-2; P61077; P61077-1; P61077; D6RA11; D6RI23; D6R980; D6RGD0; D6R933; D6R9F6

Peptide Score: 123.75

Method: FTMS; HCD; 1

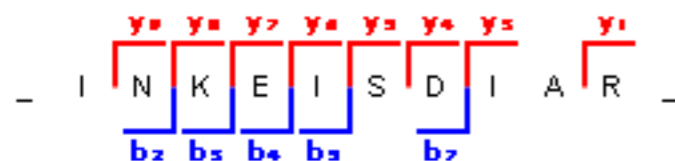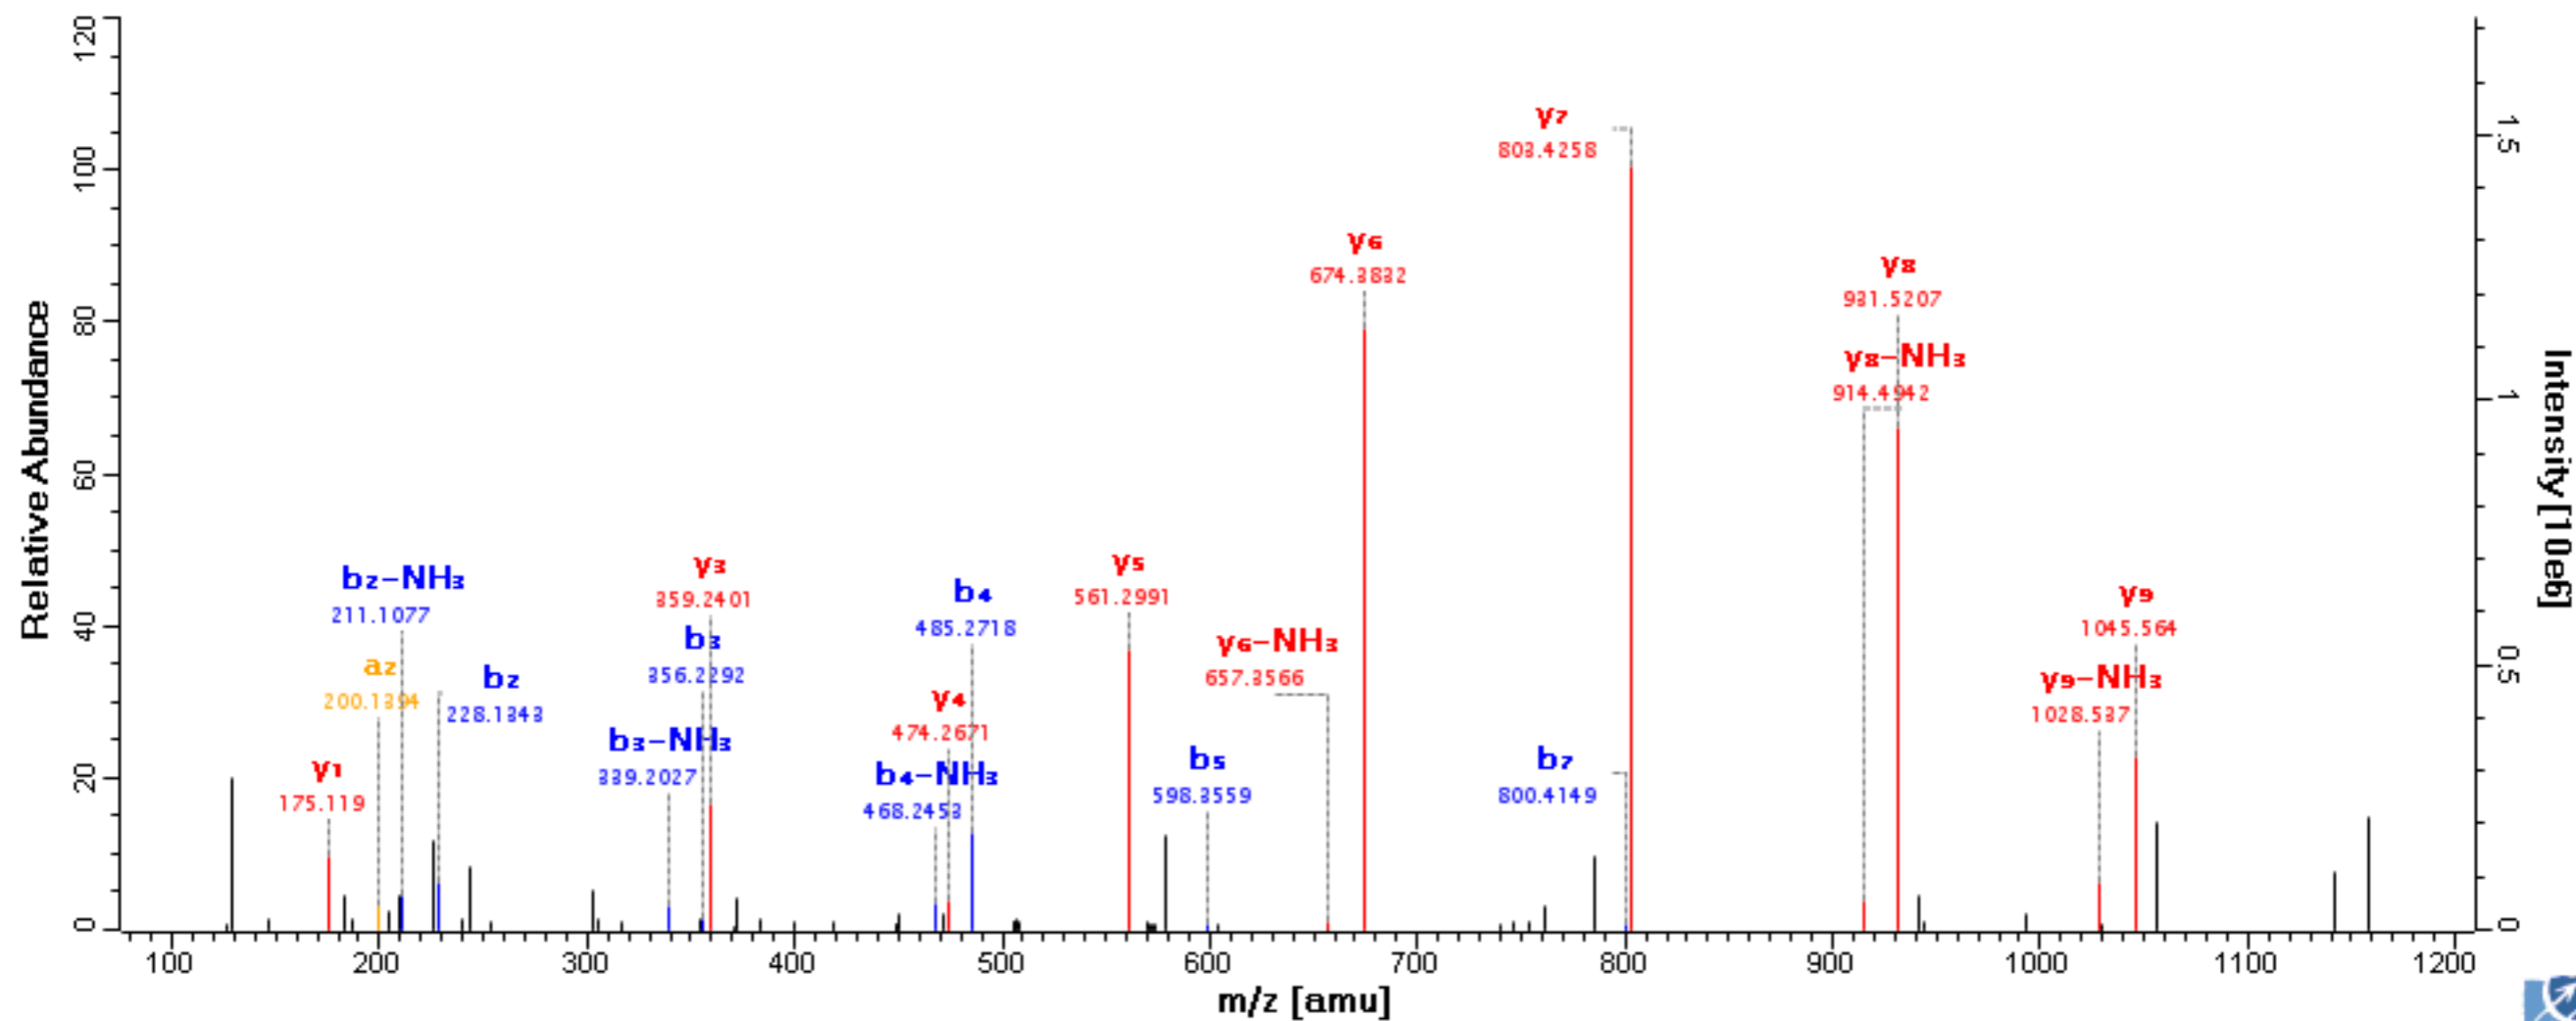

Source: Bibo\_20130531\_RM\_MSC07626\_4  
Scannumber: 16709  
Protein: P61578  
Peptide Score: 5.71  
Method: FTMS; HCD; 1

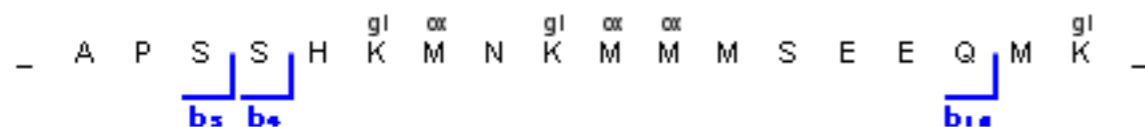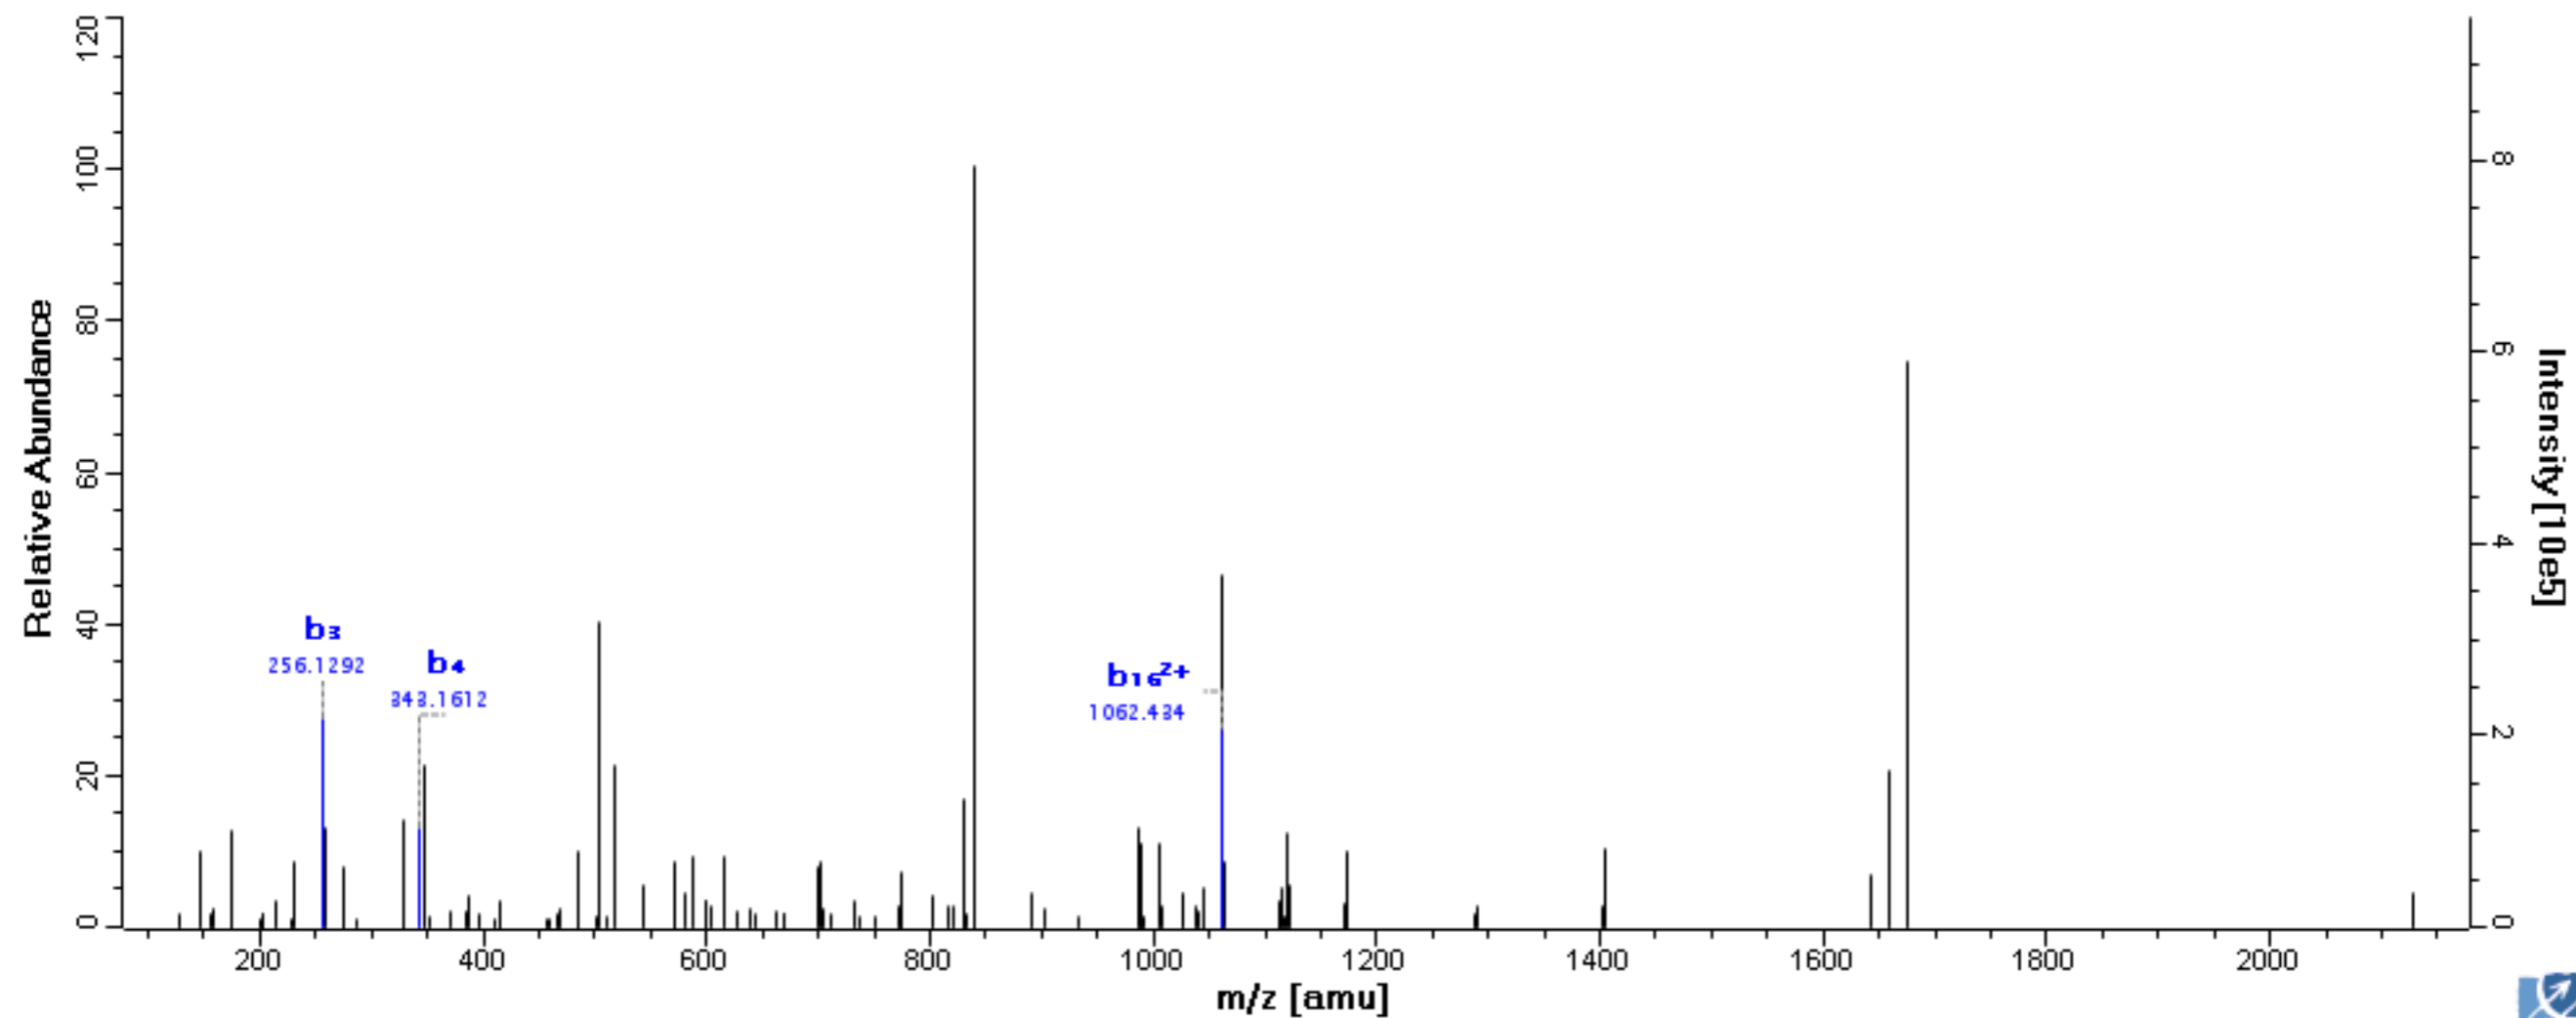

Source: Bibo\_20130531\_RM\_MSC07626\_4  
Scannumber: 16890  
Protein: IPI00982881  
Peptide Score: 1.78  
Method: FTMS; HCD; 1

ac ox ox gl gl  
\_ M C M C V C V C M Y T H F K N T K \_  
b<sub>7</sub>

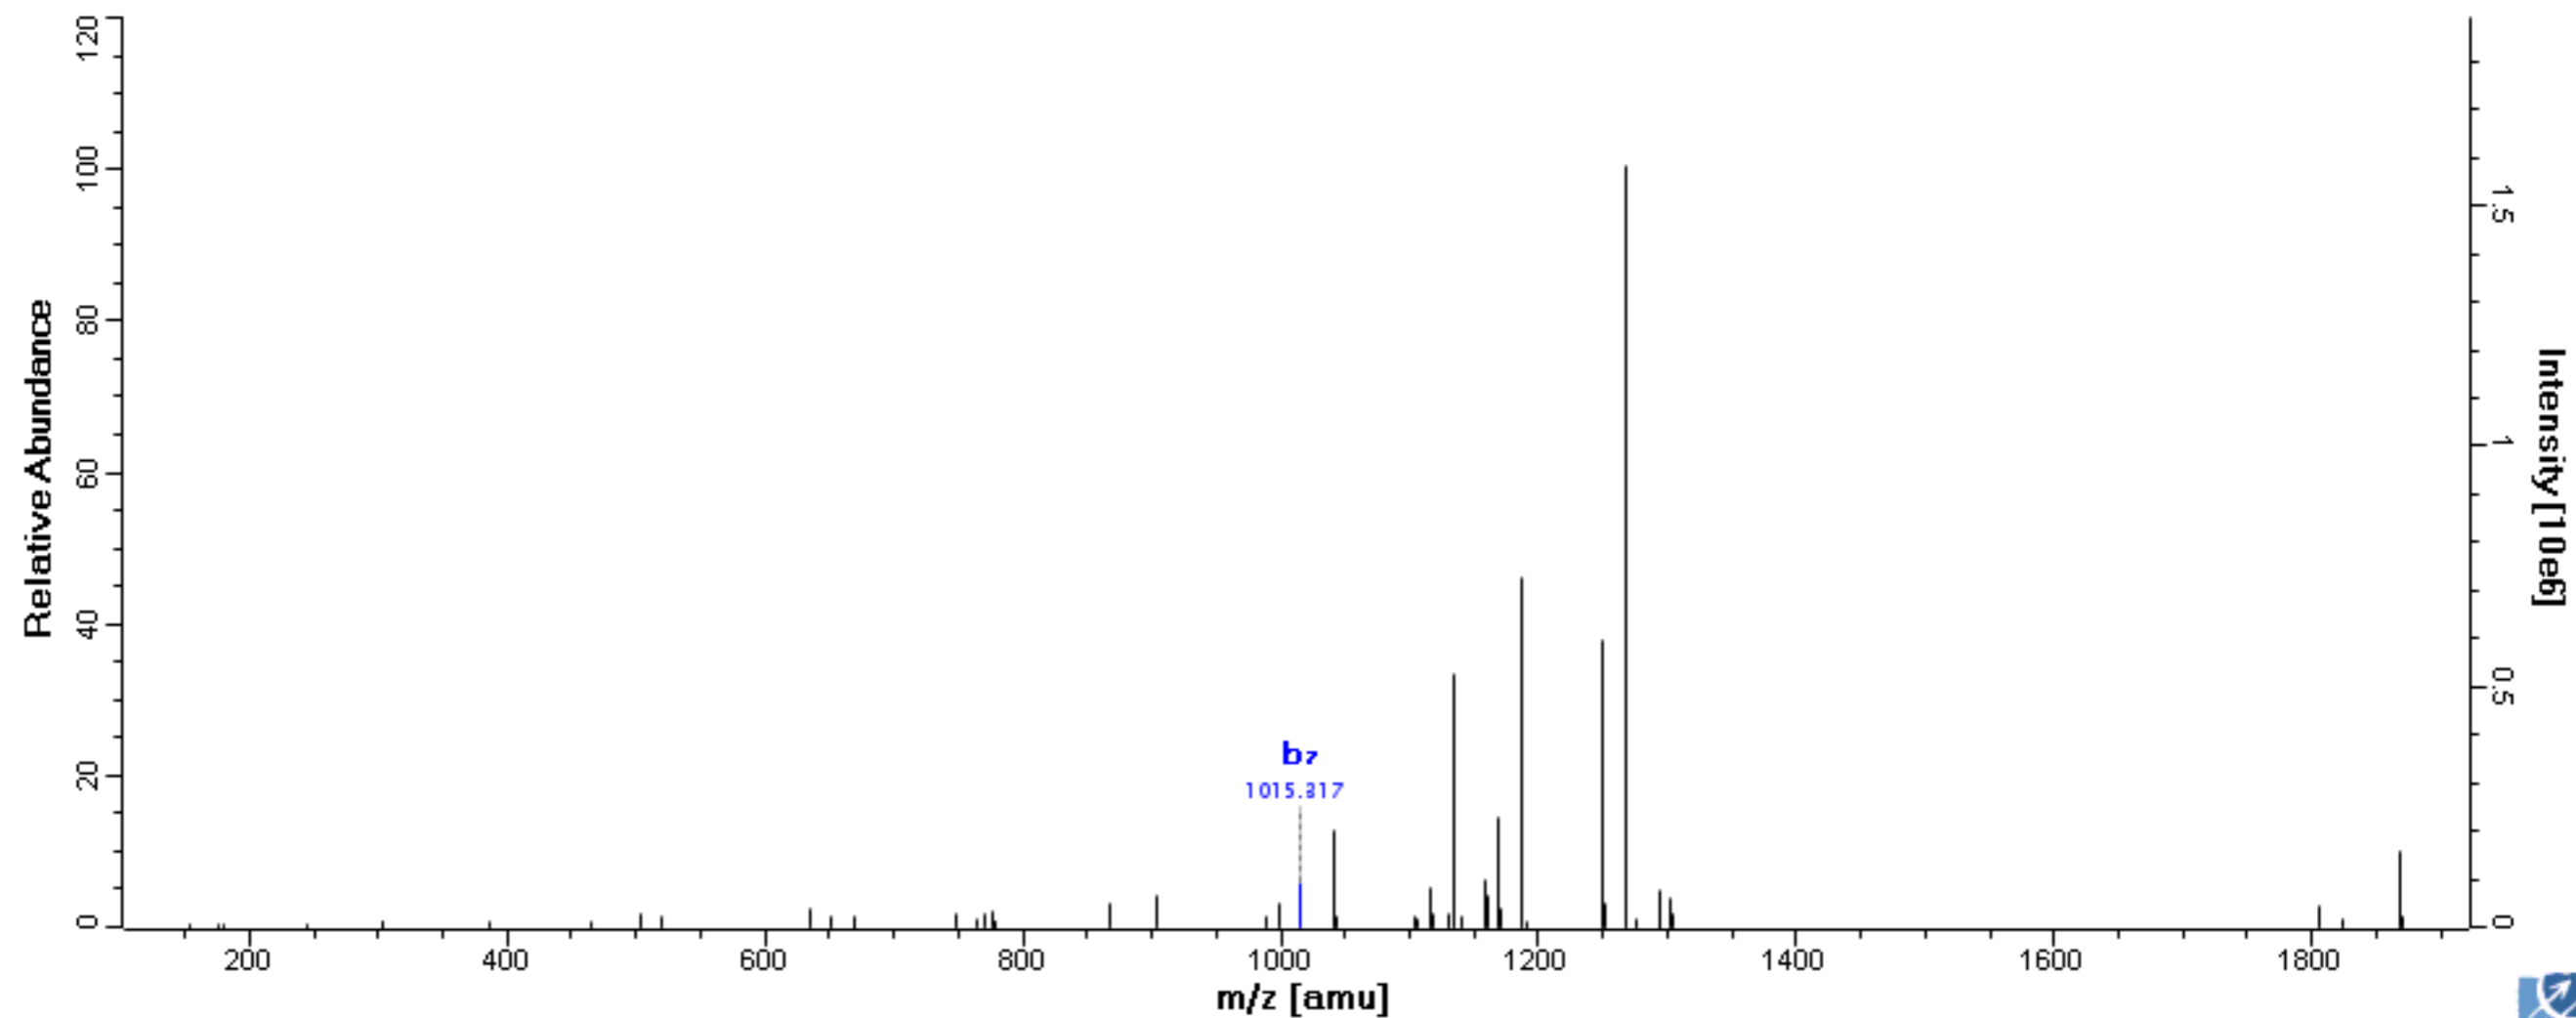

Source: Bibo\_20130531\_RM\_MSC07626\_4  
 Scannumber: 17069  
 Protein: ELP3; ELP3; Q9H9T3-1; Q9H9T3; Q9H9T3-2; Q9H9T3; E2QR15; E5RHR2; E5RIT2; E5RIZ7; E5RICO; E5RHY2; E5RG26  
 Peptide Score: 71.03  
 Method: FTMS; HCD; 1

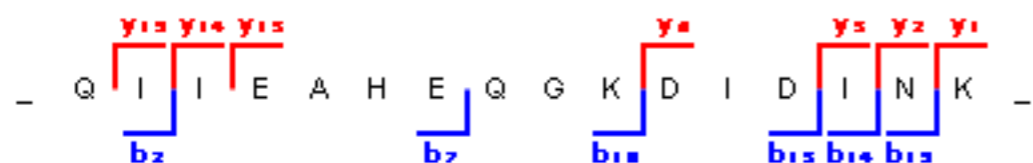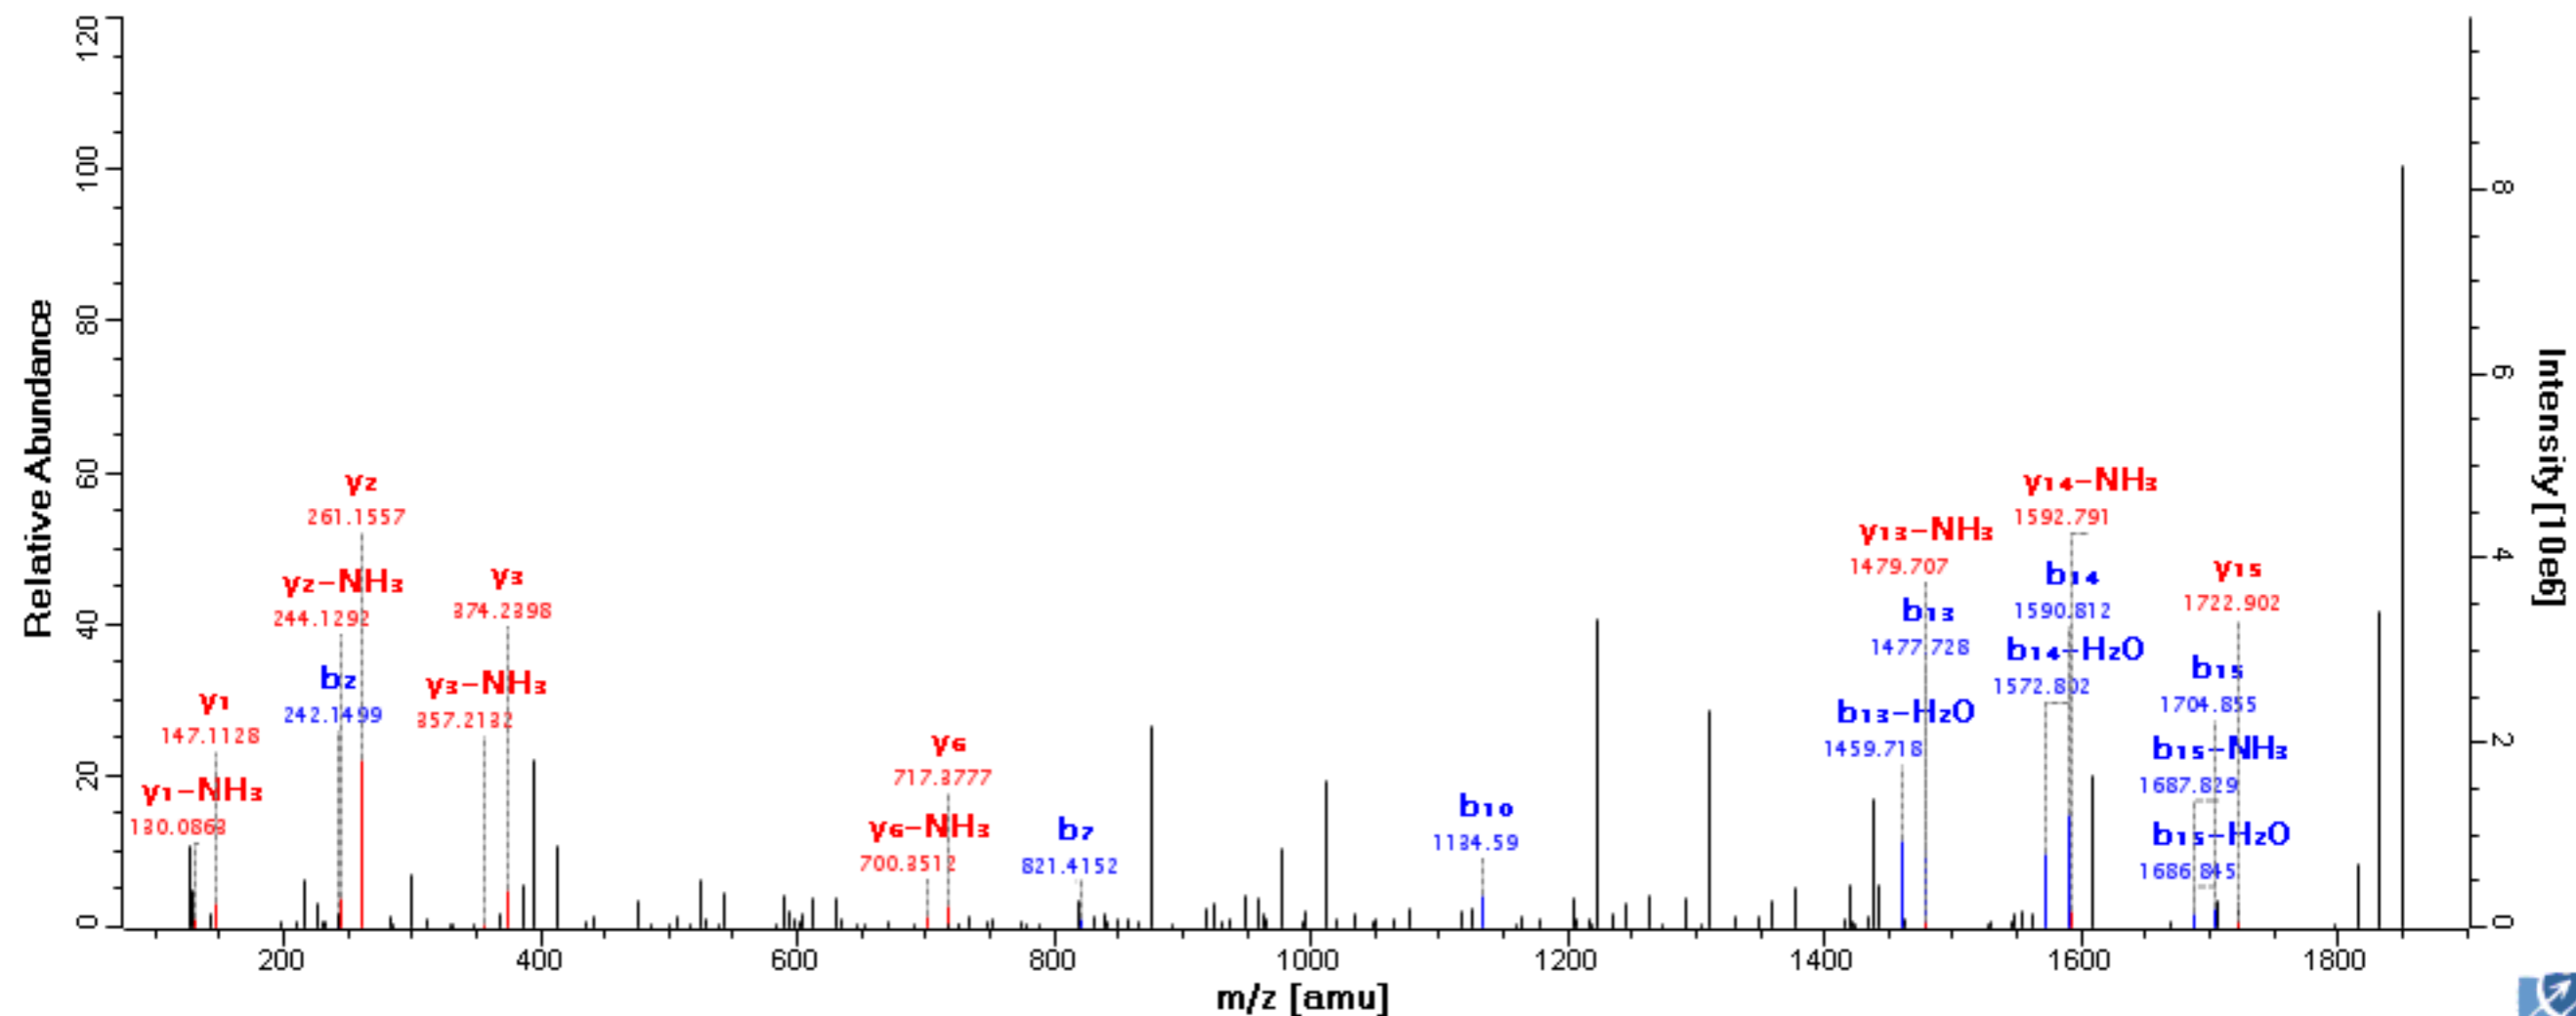

Source: Bibo\_20130531\_RM\_MSC07626\_4

Scannumber: 35384

Protein: PRSS1; TRP1; TRY1; TRYP1; PRSS3; PRSS2; TRY2; TRYP2; PRSS1; hCG\_1770551; tcag7.1285; TRY8; trypsinogen 8; PRSS1; TRP1; TRY1; TRYP1; T6; TRY6; PRSS1; E7EQ64; Q7Z5F3; P07477;

Peptide Score: 71.6

Method: FTMS; HCD; 1

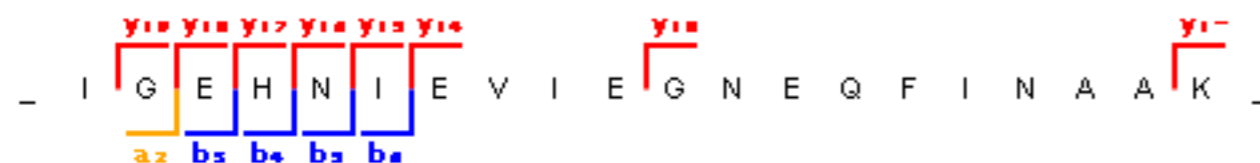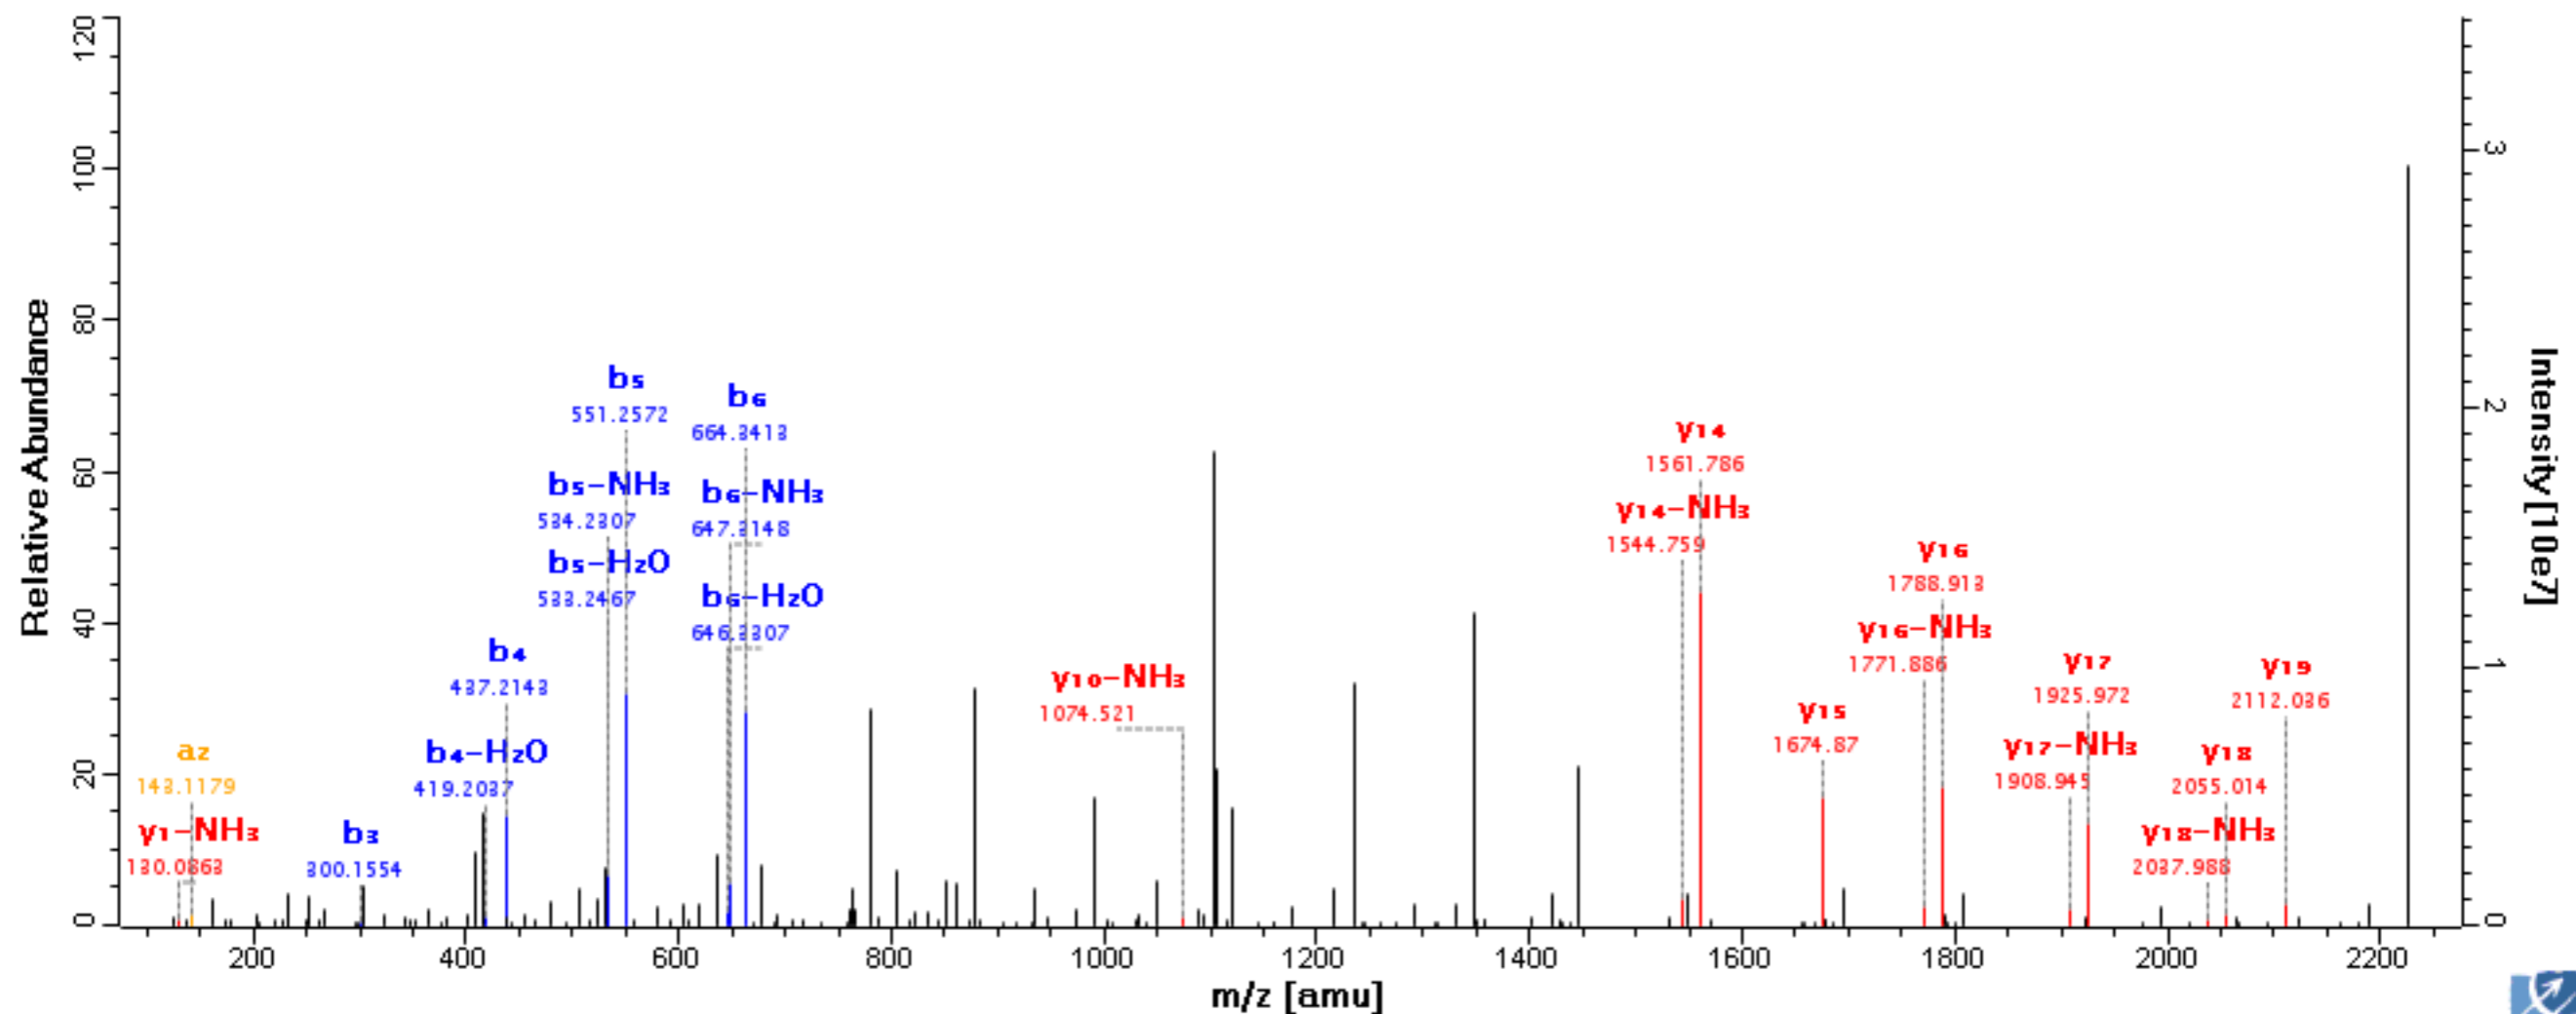

Source: Bibo\_20130531\_RM\_MSC07626\_4

Scannumber: 36896

Protein: KIAA0881; MAP3K17; PSK; PSK1; TAOK2; UNQ2971/PRO7431; TAOK2; KIAA0881; MAP3K17; PSK; PSK1; TAOK2; UNQ2971/PRO7431; TAOK2; Q9UL54-1; Q9UL54; Q86V37; B7ZM88; Q9UL

Peptide Score: 109.11

Method: FTMS; HCD; 1

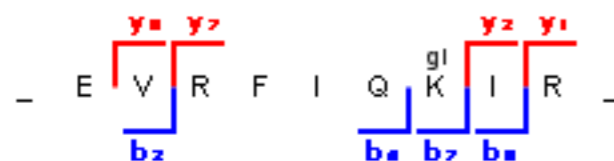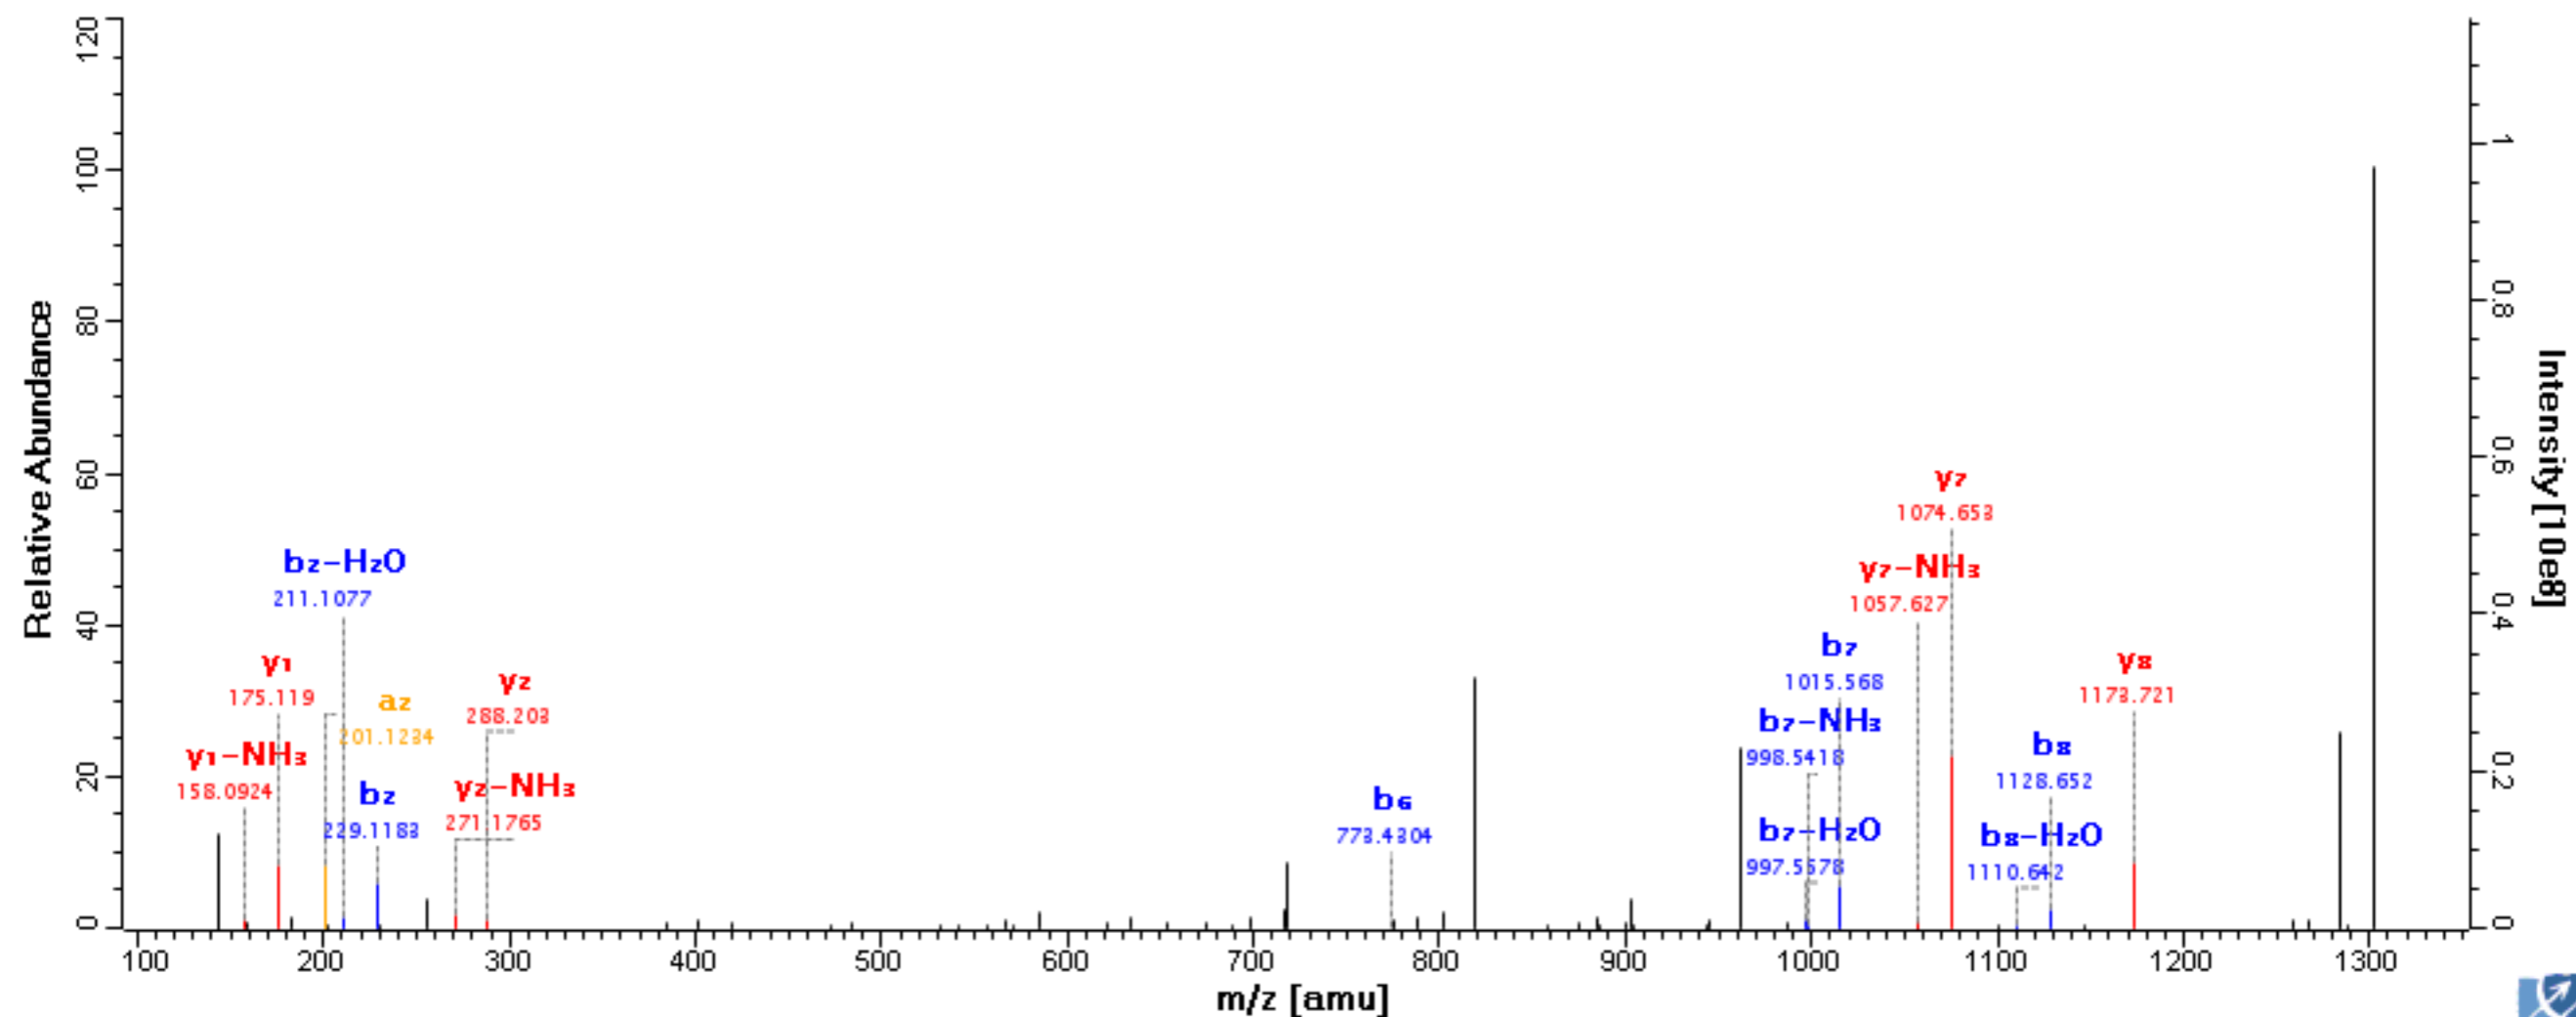

Source: Bibo\_20130531\_RM\_MSC07626\_4  
Scannumber: 47872  
Protein: CCHL; HCCS; DKFZp779I1858; P53701; Q68D50  
Peptide Score: 10.28  
Method: FTMS; HCD; 1

W V Y P S E Q M F W N A M I K K

$\gamma_1$   
 $\alpha$   
 $\gamma_2$   
 $\gamma_3$

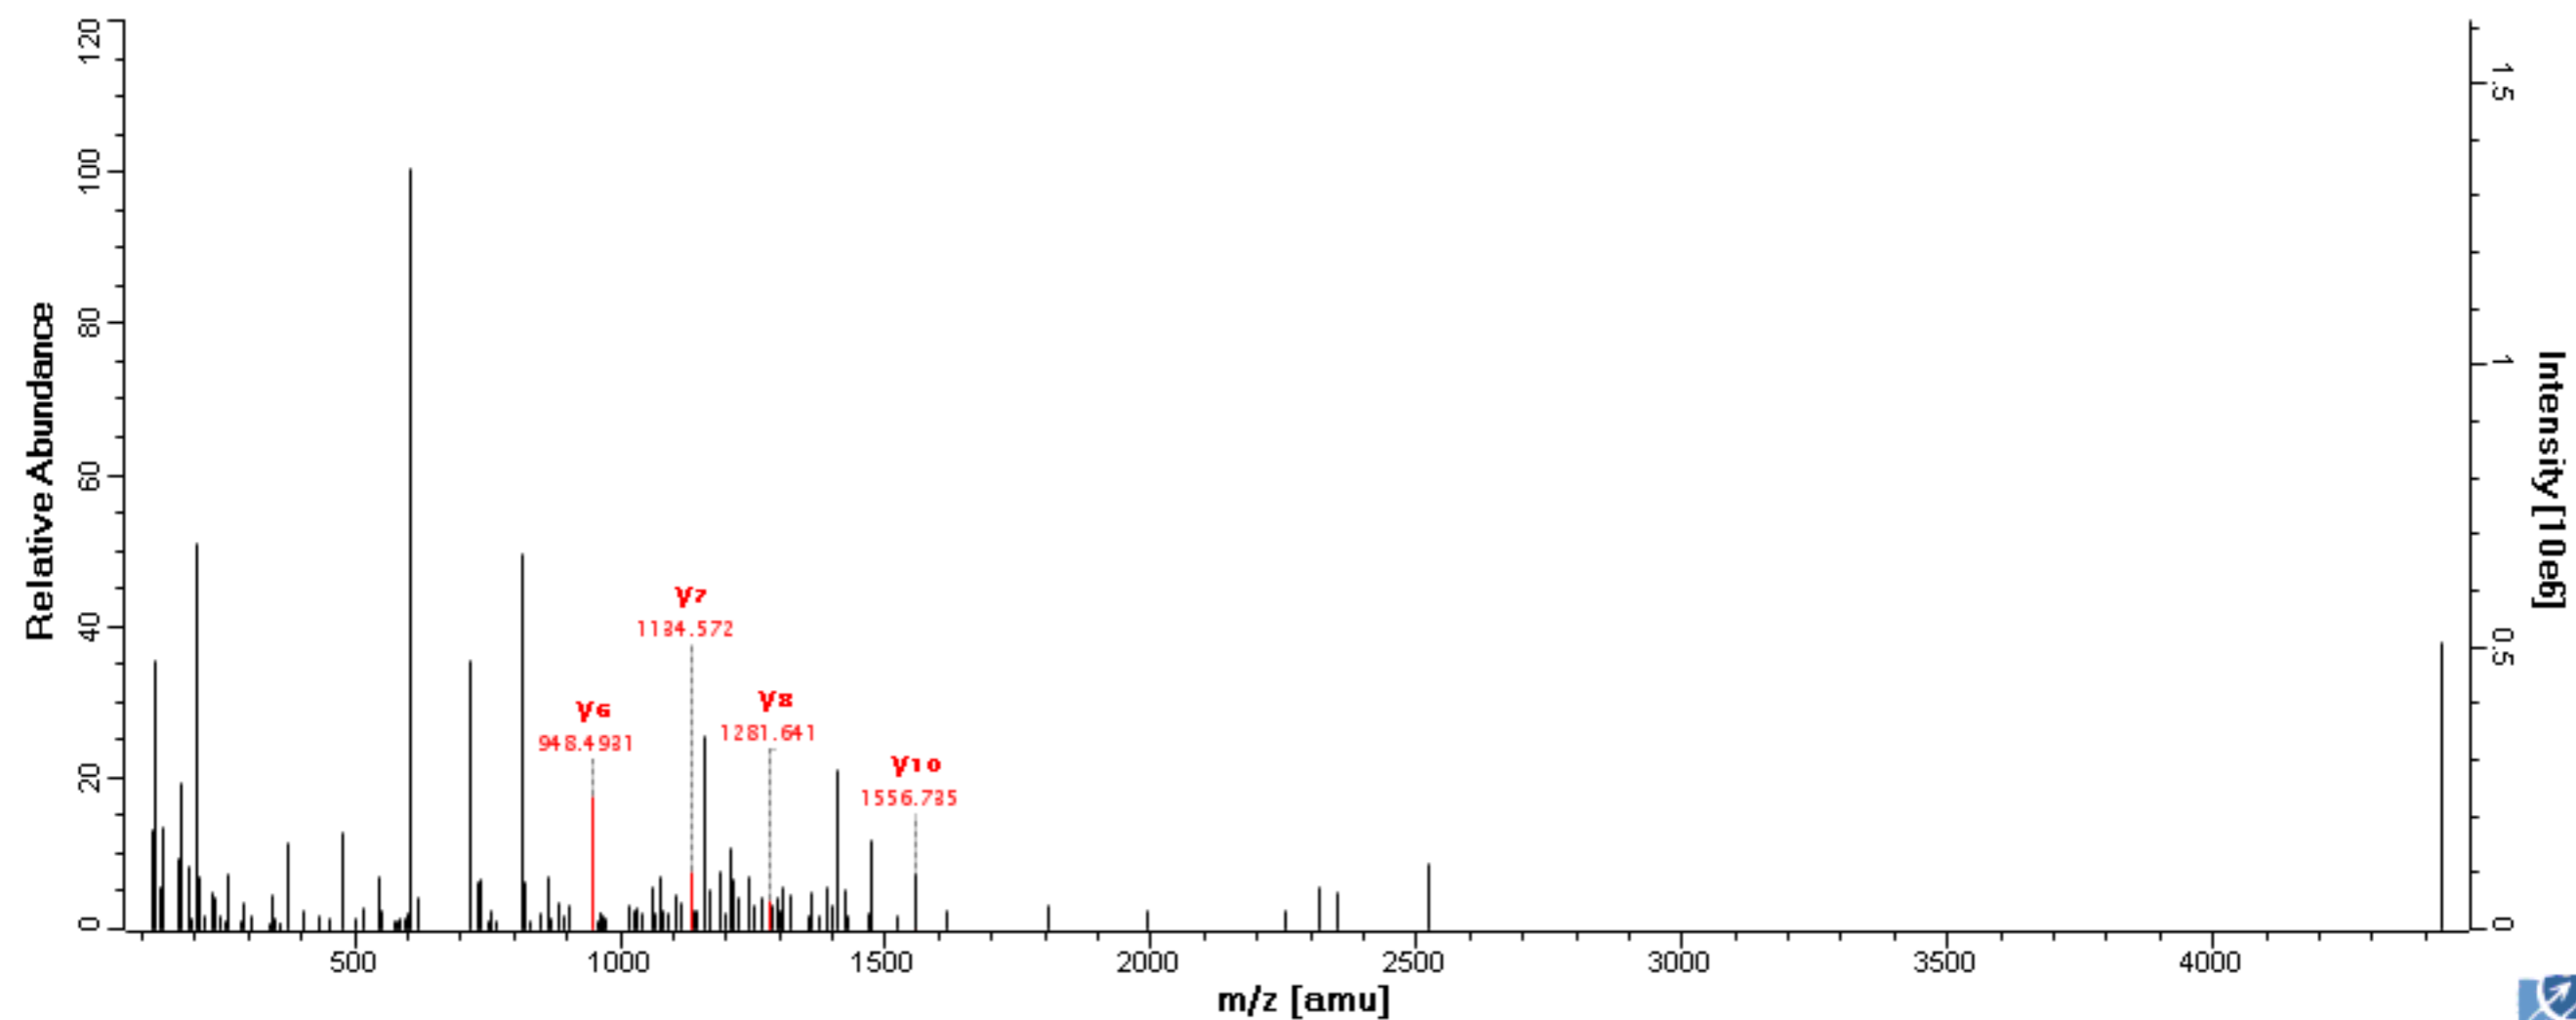

Source: Bibo\_20130531\_RM\_MSC07626\_4  
 Scannumber: 51724  
 Protein: FLJ44955; Q0VFX3  
 Peptide Score: 10.59  
 Method: FTMS; HCD; 1

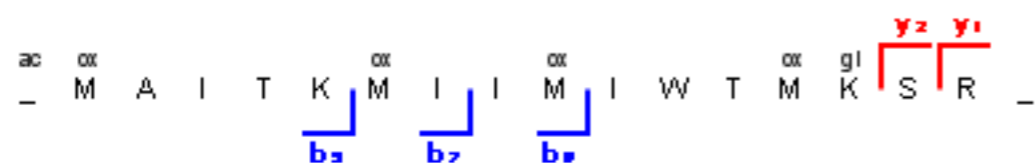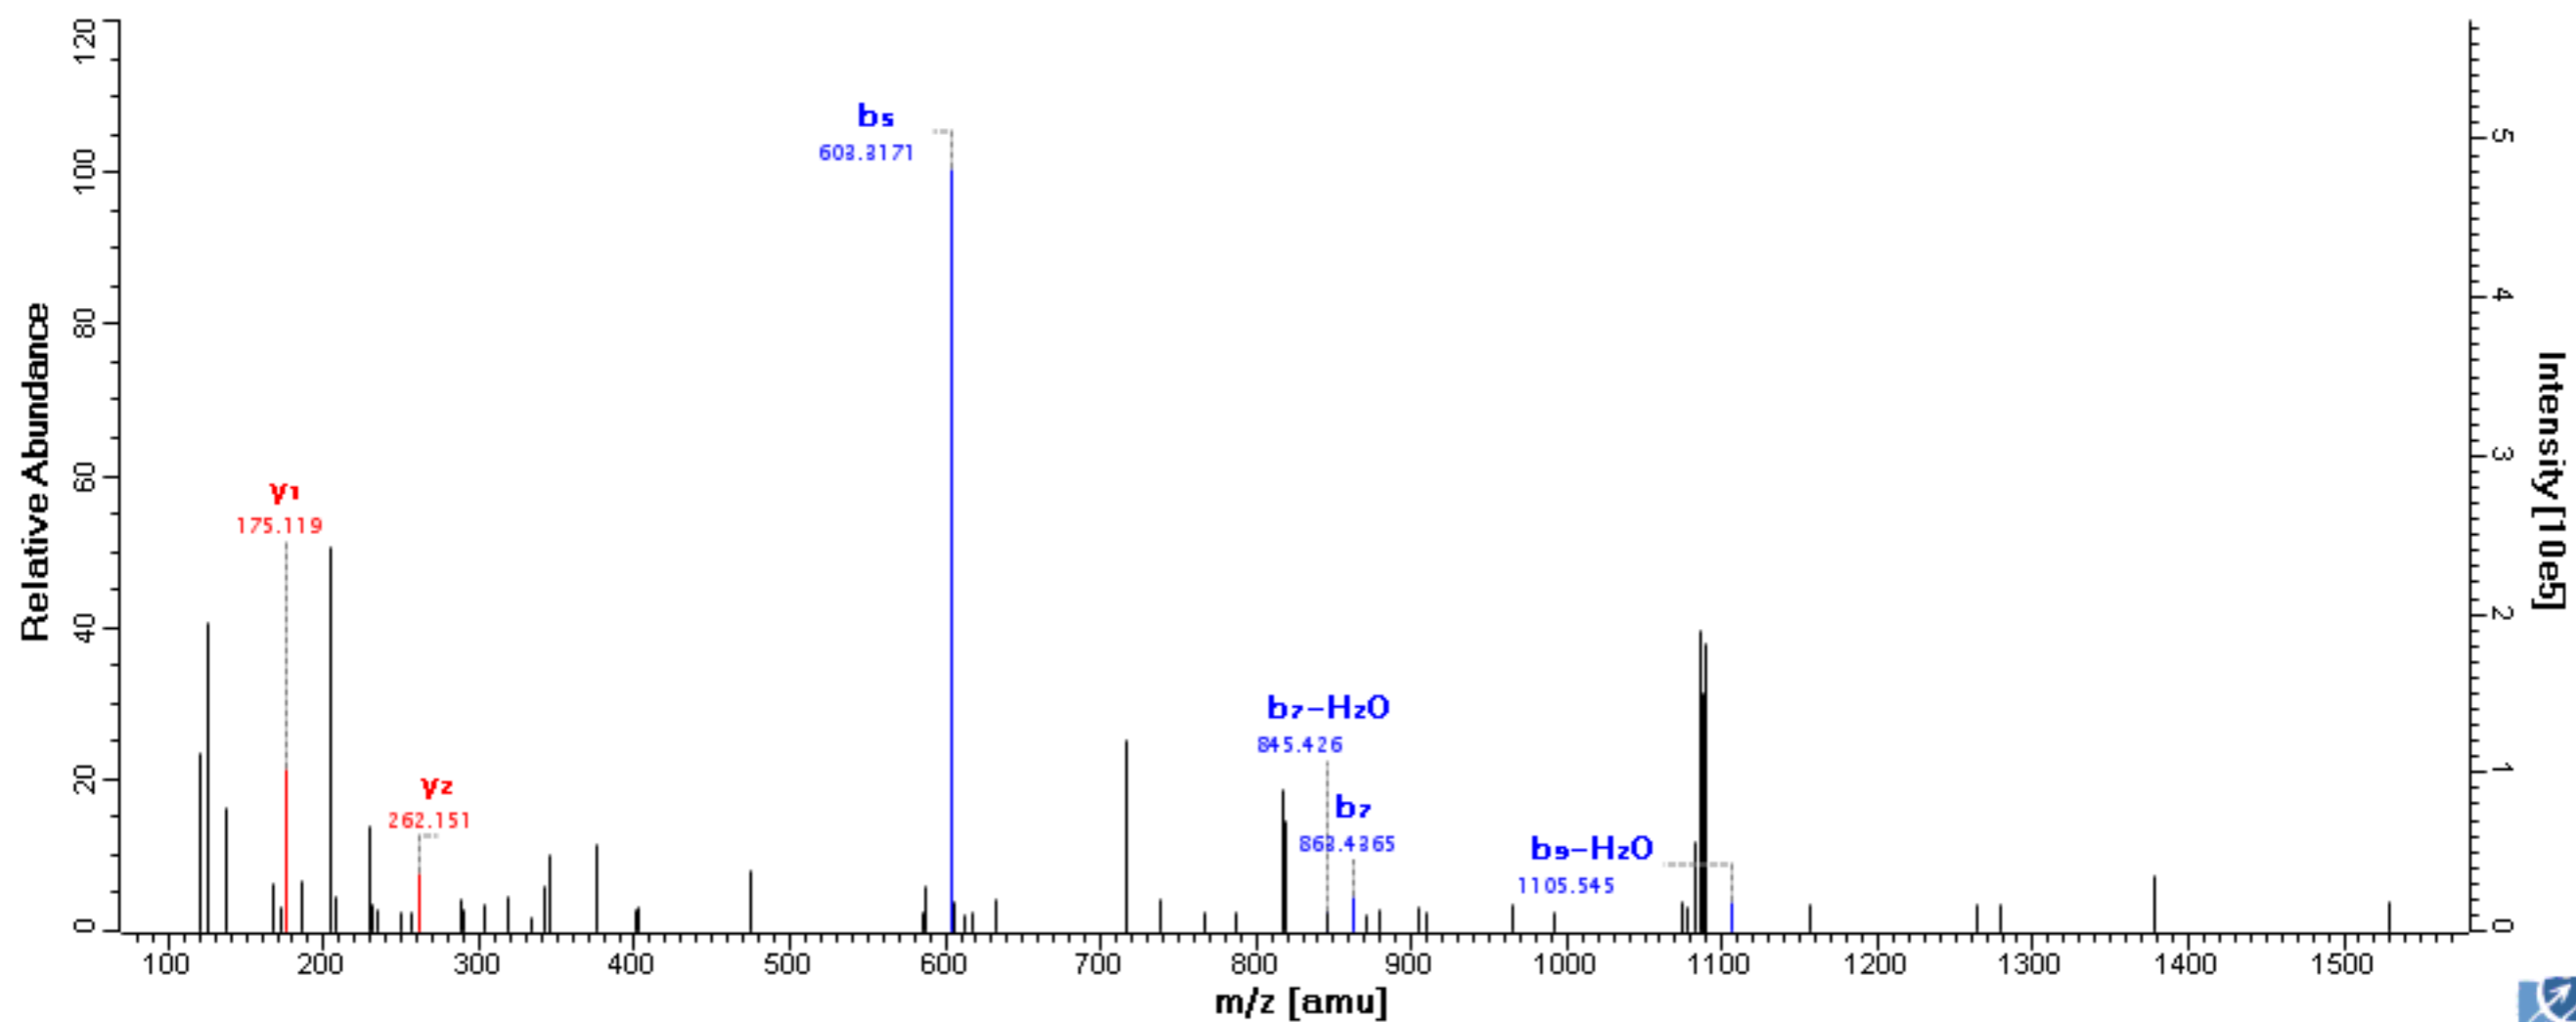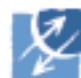

Source: Bibo\_20130531\_RM\_MSC07626\_4  
 Scannumber: 55250  
 Protein: IPI00978164; IPI00983555  
 Peptide Score: 61.82  
 Method: FTMS; HCD; 1

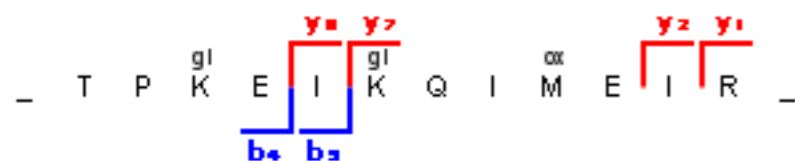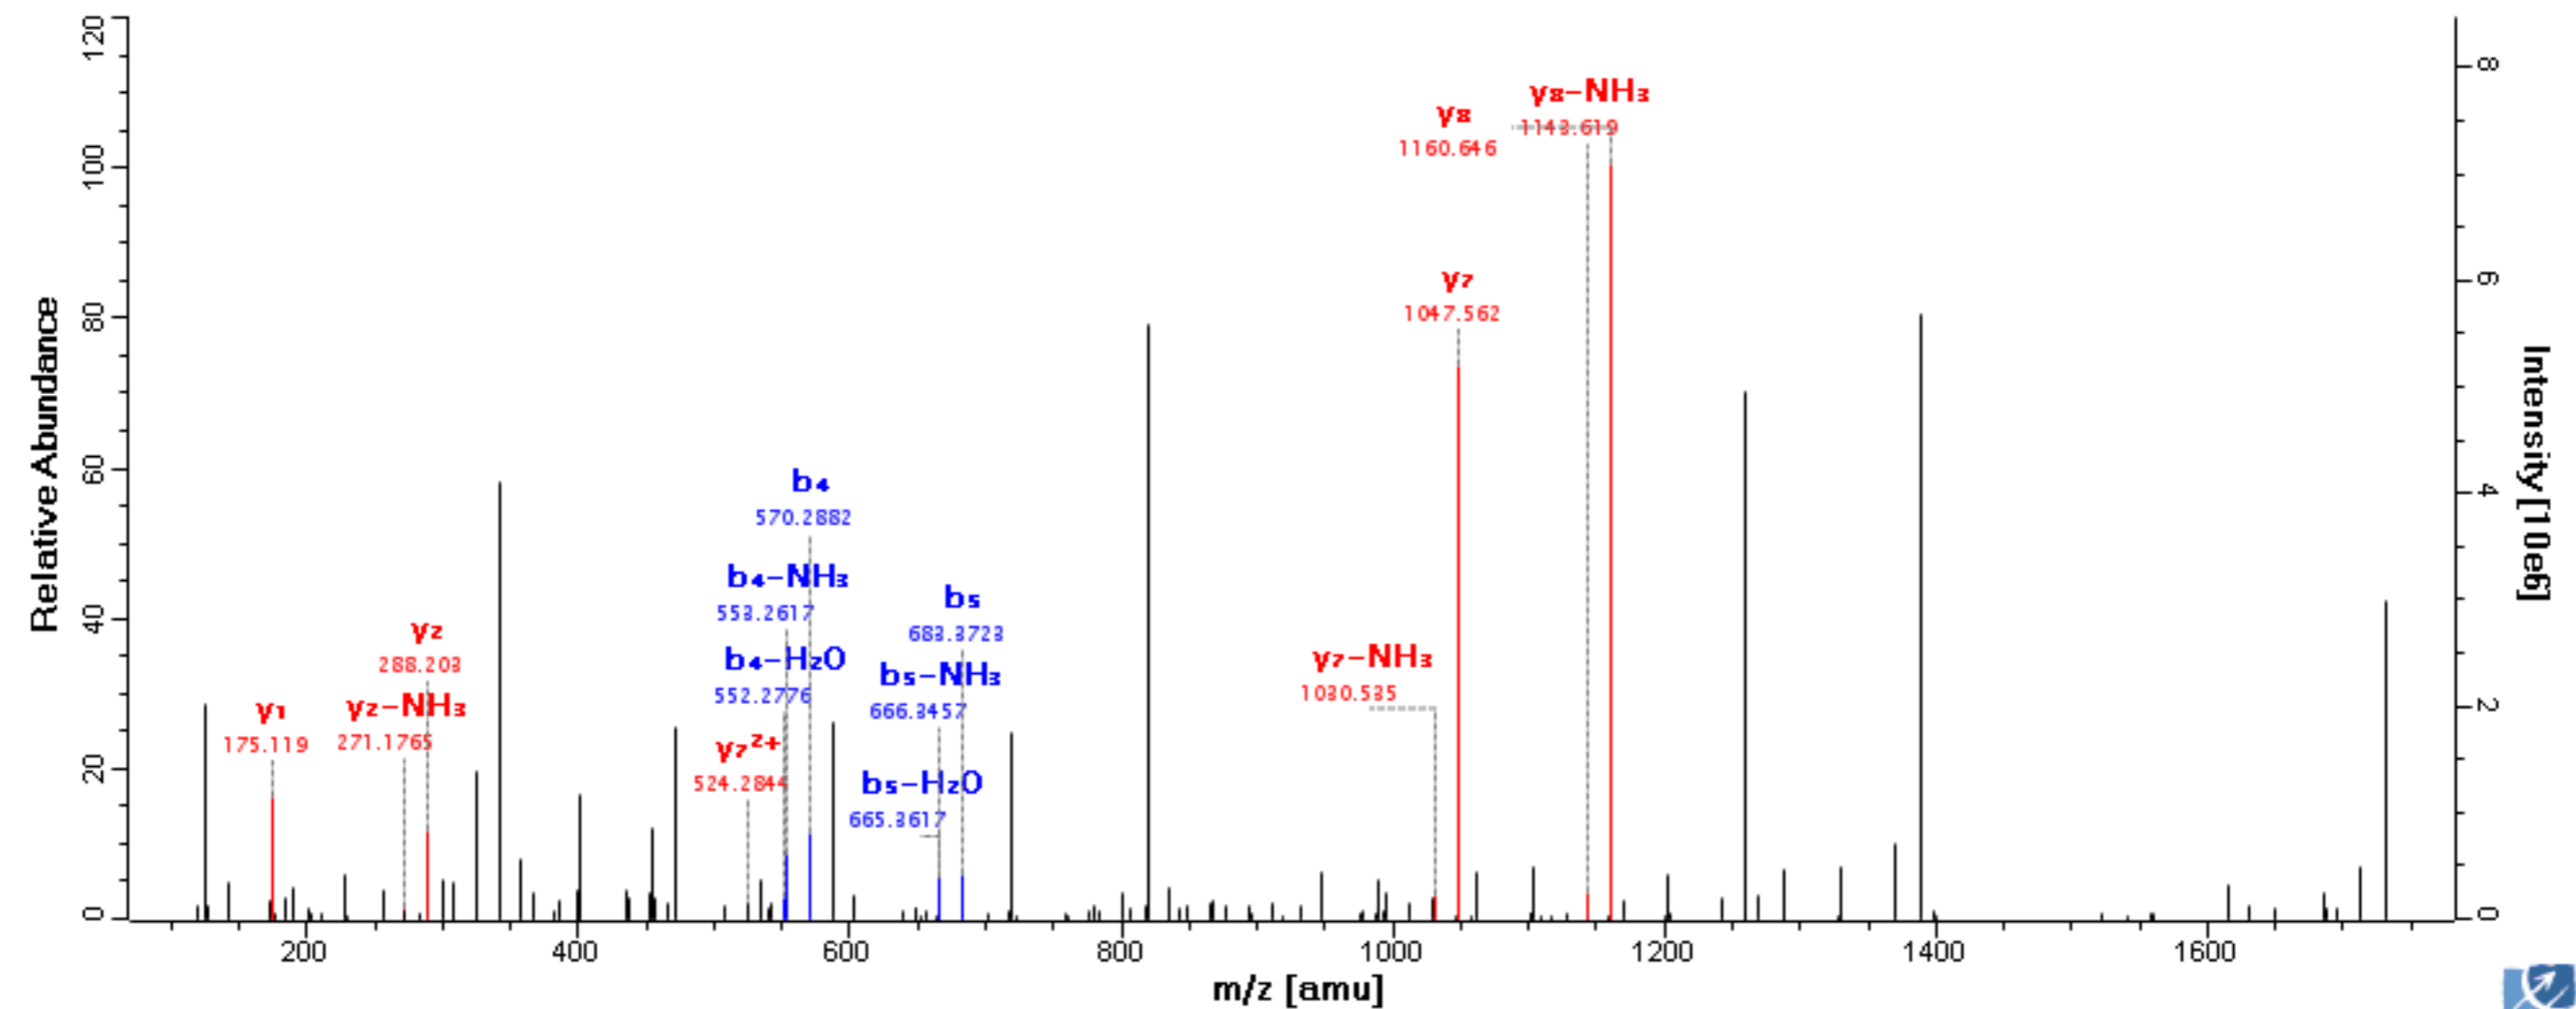

Source: Bibo\_20130531\_RM\_MSC07627\_1\_3  
 Scannumber: 2714  
 Protein: HNRNPA2B1; HNRPA2B1; HNRNPA2B1; HNRPA2B1; HNRNPA2B1; P22626-1; P22626; P22626-2; P22626; B8ZZ37  
 Peptide Score: 111.65  
 Method: FTMS; HCD; 1

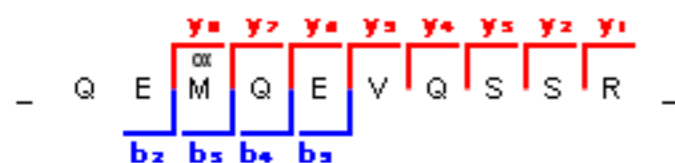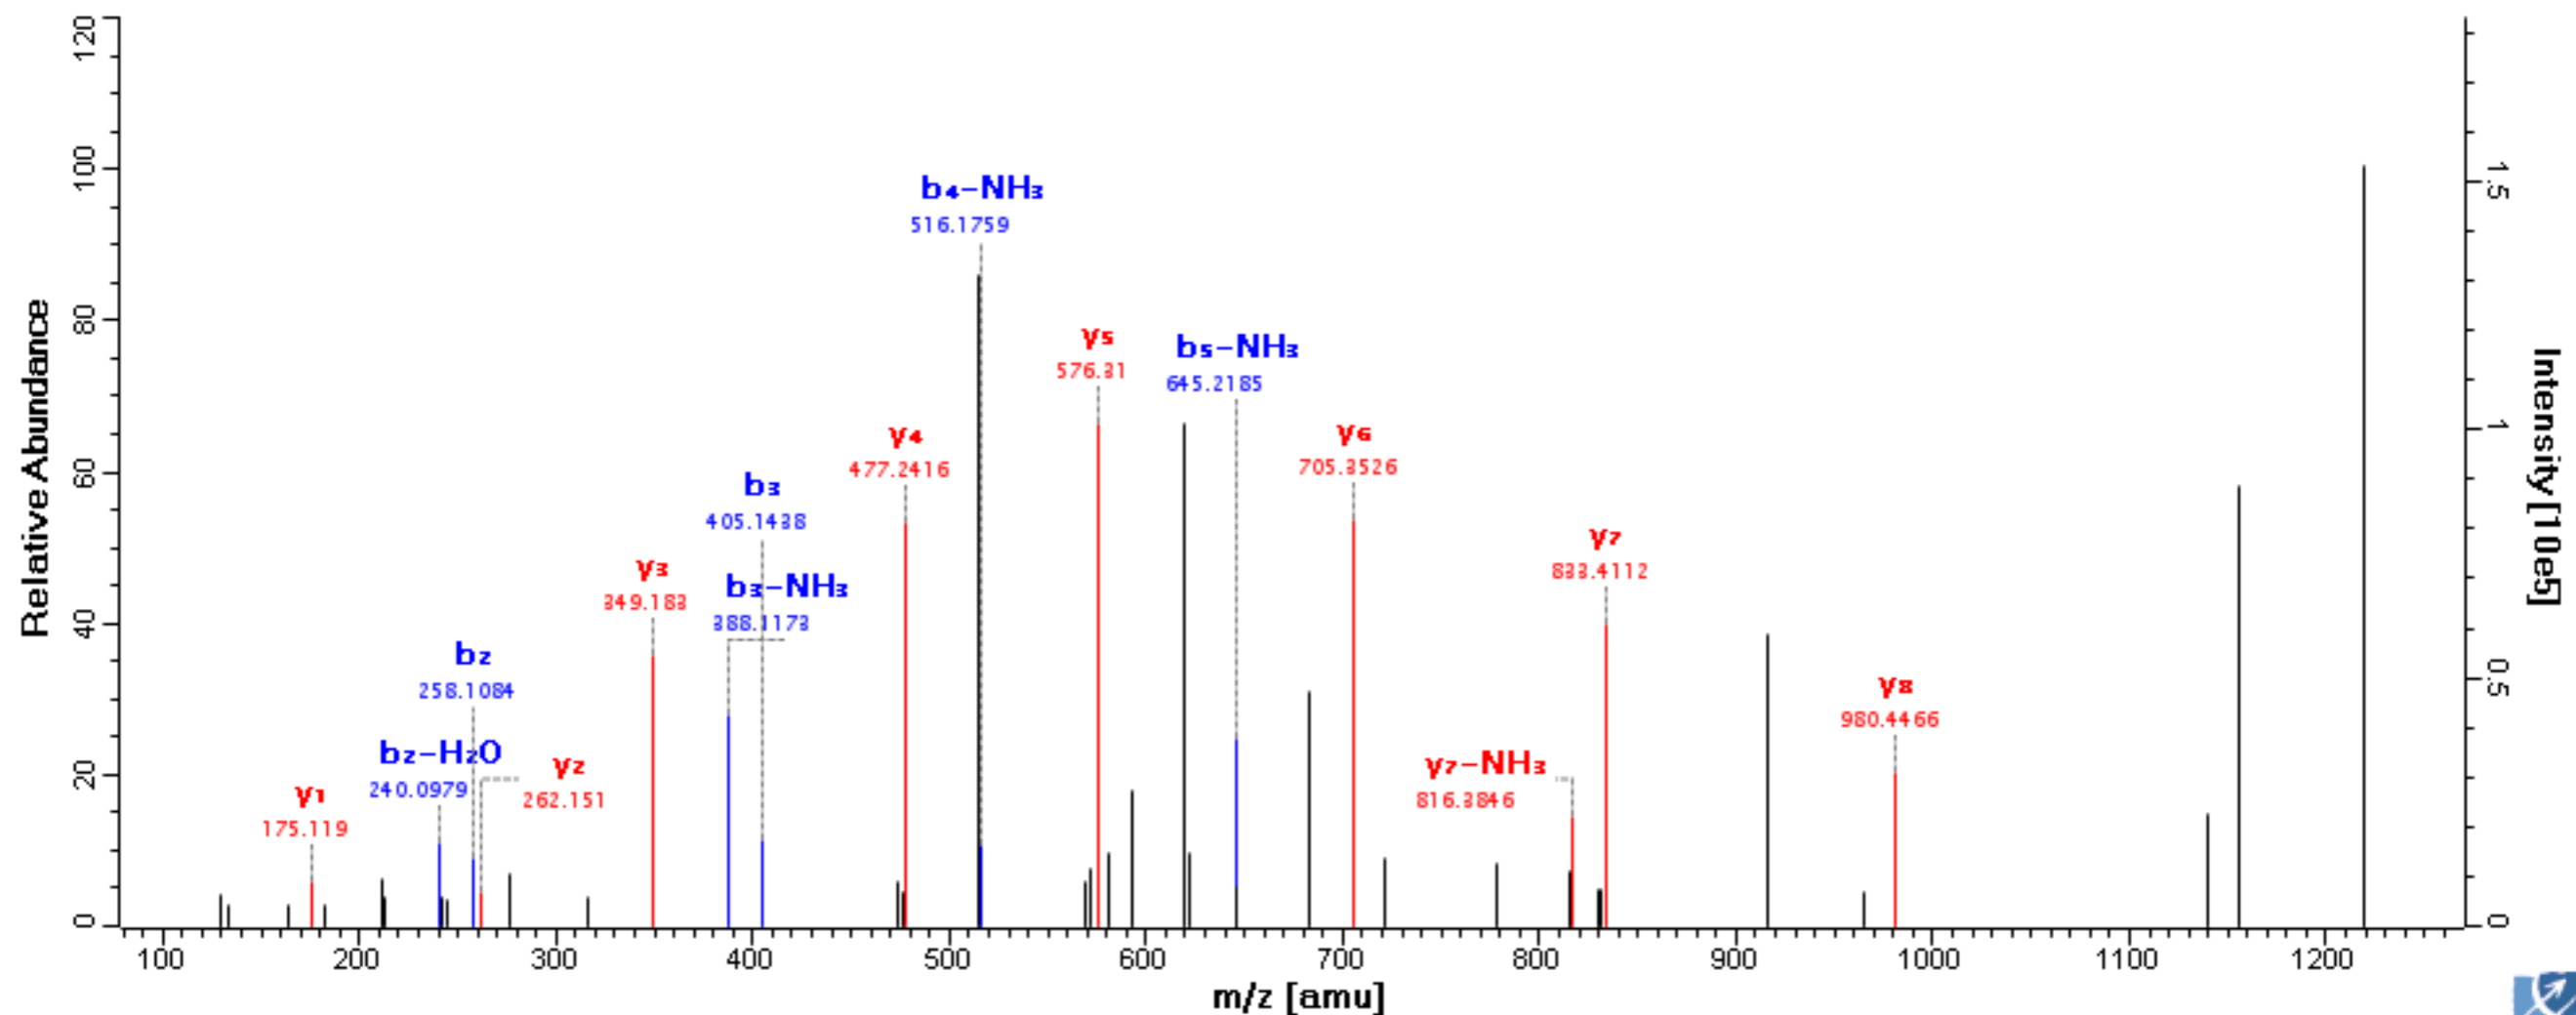

Source: Bibo\_20130531\_RM\_MSC07627\_1\_3  
 Scannumber: 3409  
 Protein: COL1A1; hCG\_29609; P02452; D3DTX7; Q14042; Q6LAN8; Q9UMA6; B7Z4S2  
 Peptide Score: 136.16  
 Method: FTMS; HCD; 1

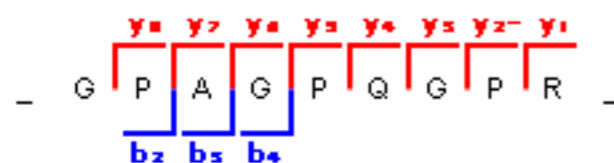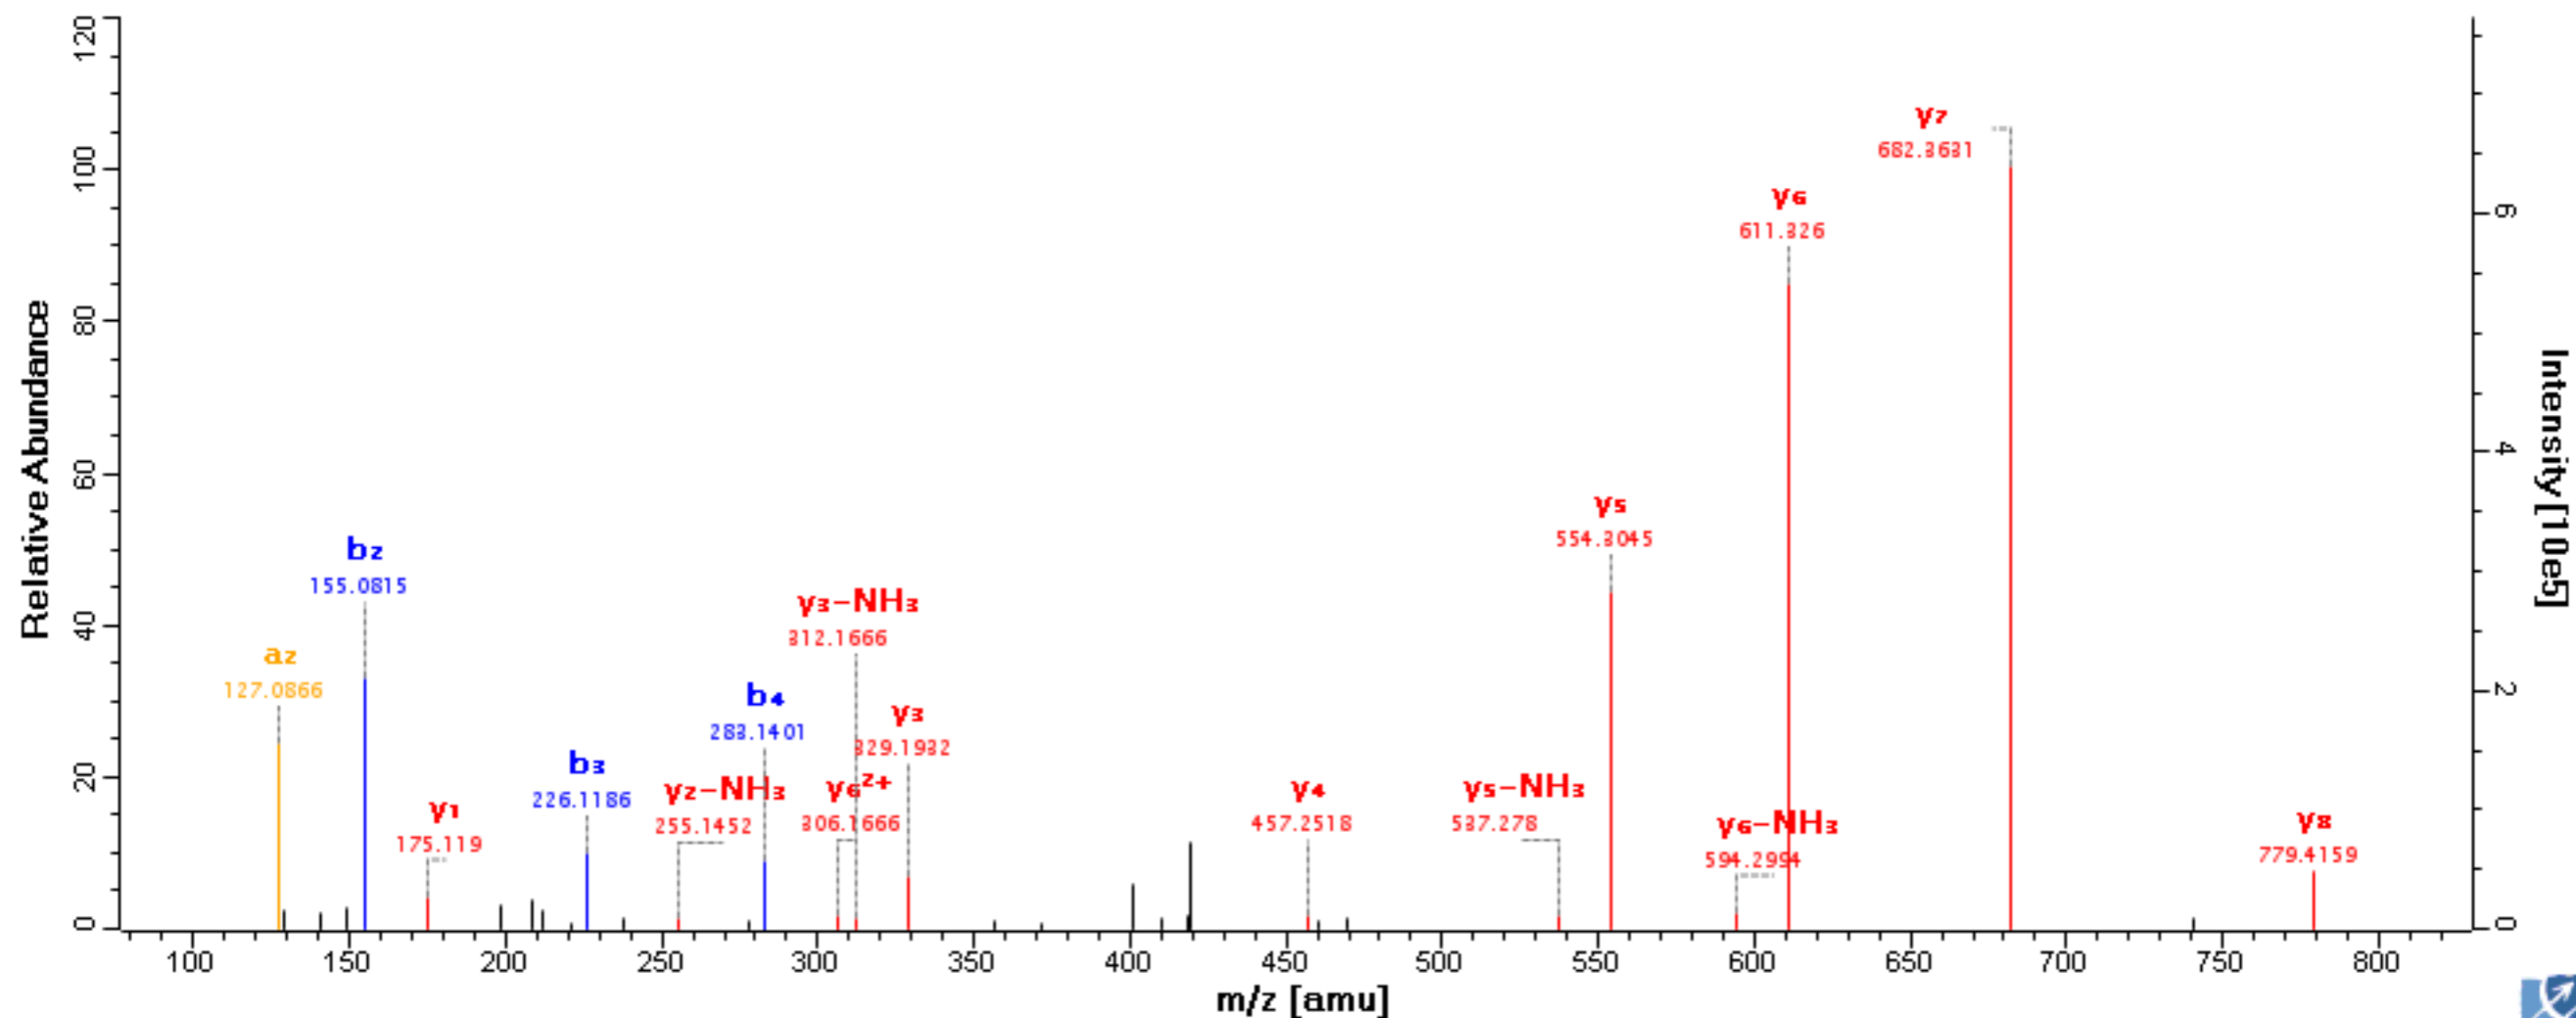

Source: Bibo\_20130531\_RM\_MSC07627\_1\_3  
 Scannumber: 7060  
 Protein: CCDC123; TMC1; CCDC123; TEX9; ETFB; FP585; hCG\_40112; TEX9; ETFB; FP585; BTN3A3; Q96ST8-1; Q96ST8; Q8TDI8; Q96ST8-2; Q96ST8; Q8N6V9; P38117-2; P38117; B4DH73; P3811  
 Peptide Score: 170.96  
 Method: FTMS; HCD; 1

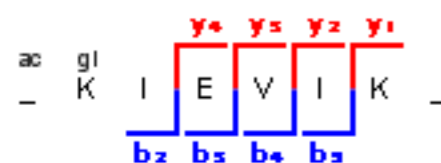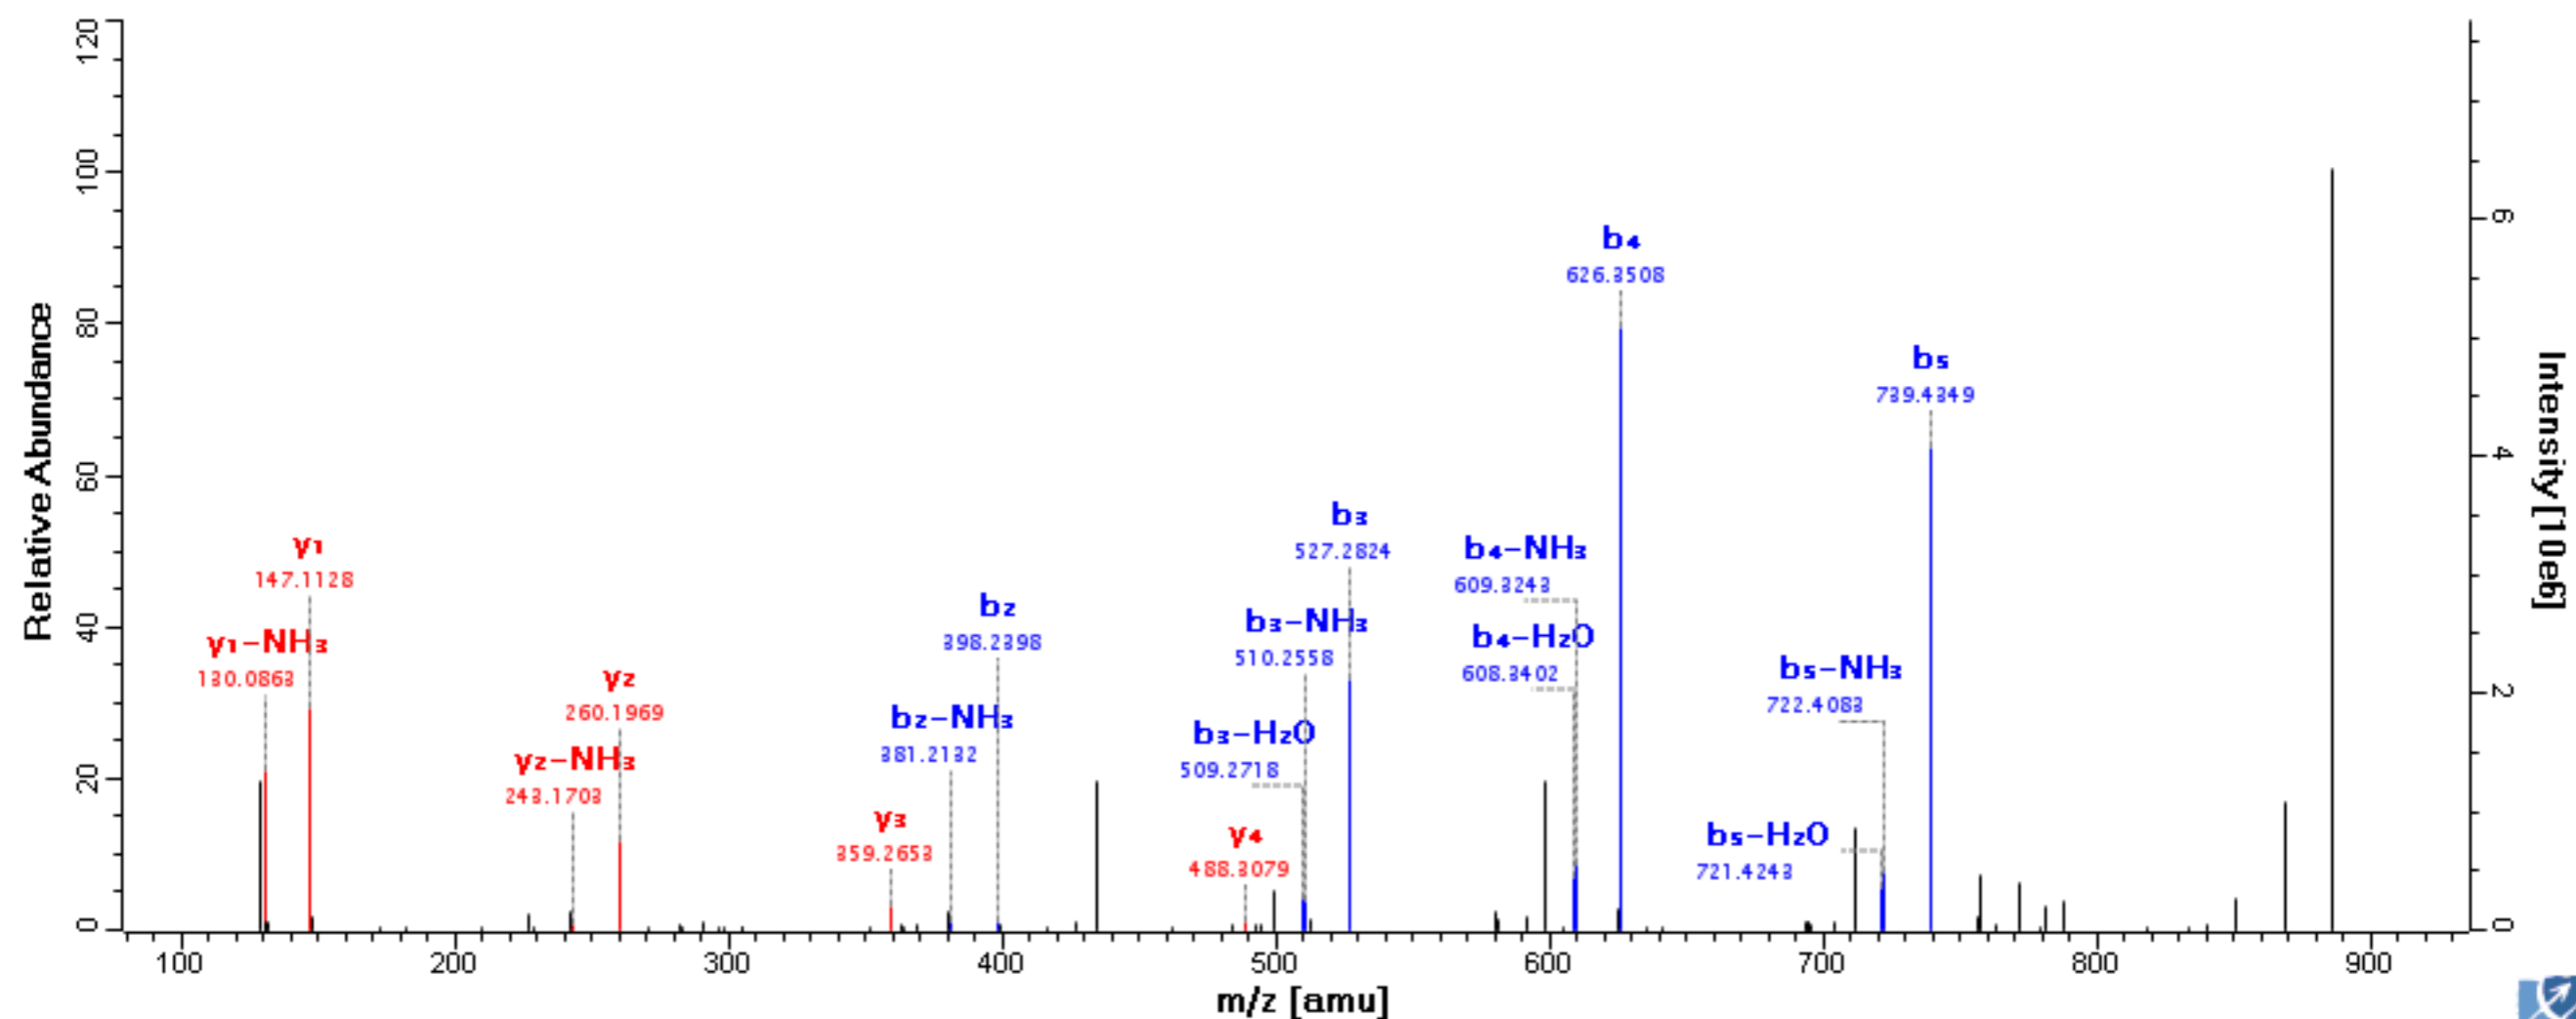

Source: Bibo\_20130531\_RM\_MSC07627\_1\_3  
 Scannumber: 7652  
 Protein: RPLP0; RPLP0; P05388; A8K4Z4; B4E3D5; Q3MHV2; Q53HK9; Q53HW2; Q8NHW5; Q3B7A4; Q6NSF2  
 Peptide Score: 104.52  
 Method: FTMS; HCD; 1

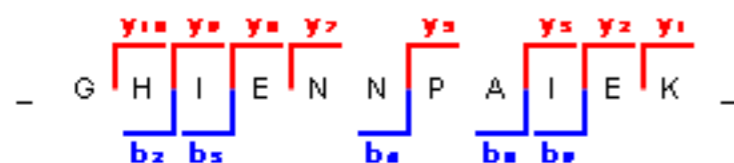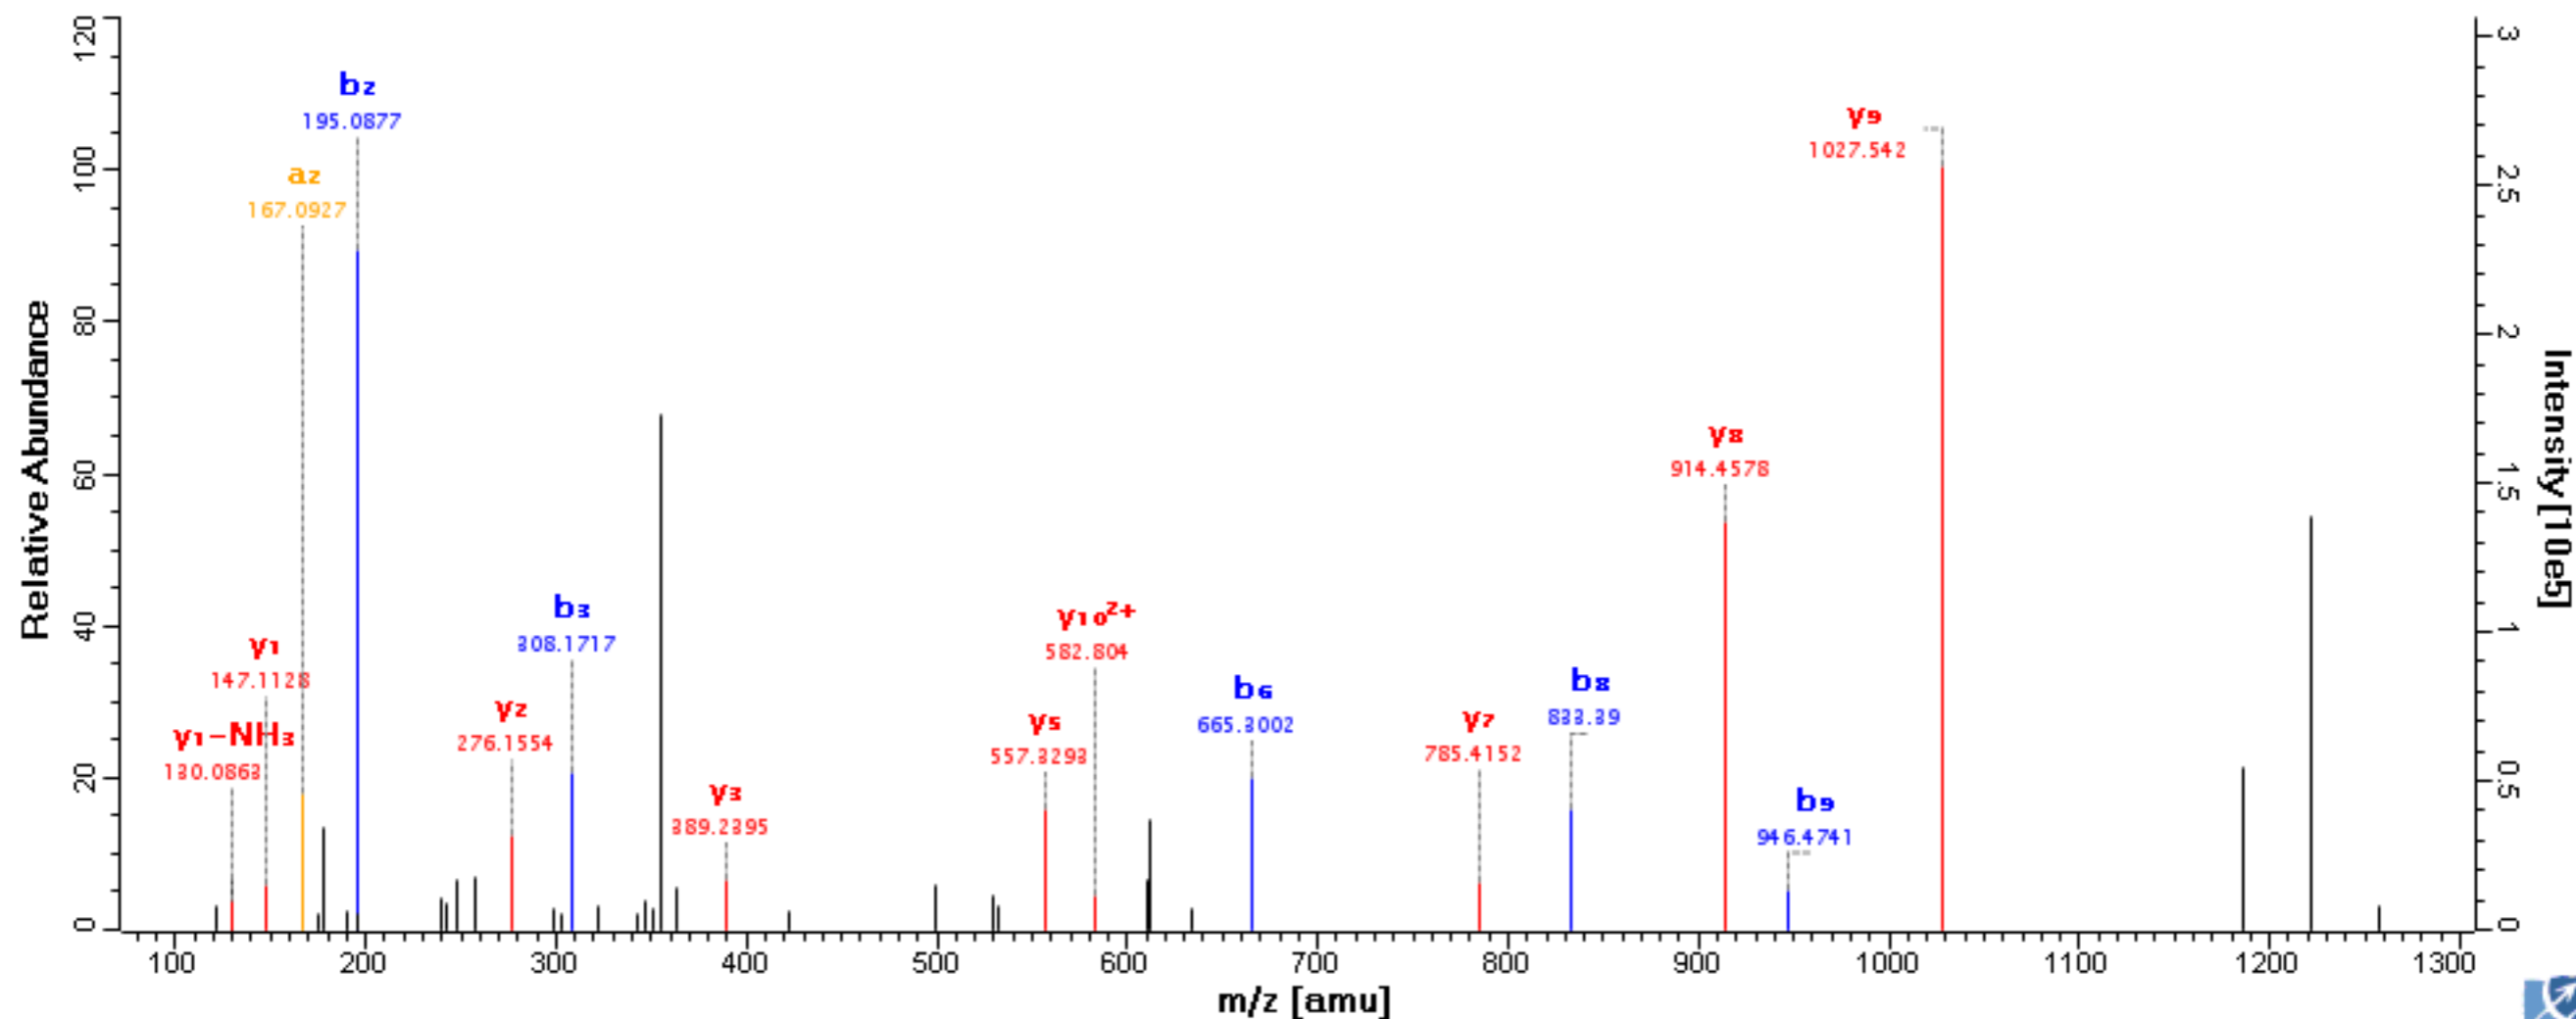

Source: Bibo\_20130531\_RM\_MSC07627\_1\_3  
 Scannumber: 8597  
 Protein: KIAA0794; UBXD7; UBXN7; O94888; B4E126  
 Peptide Score: 150.09  
 Method: FTMS; HCD; 1

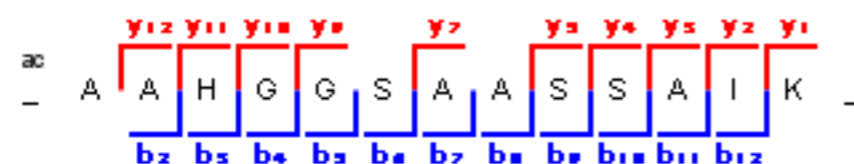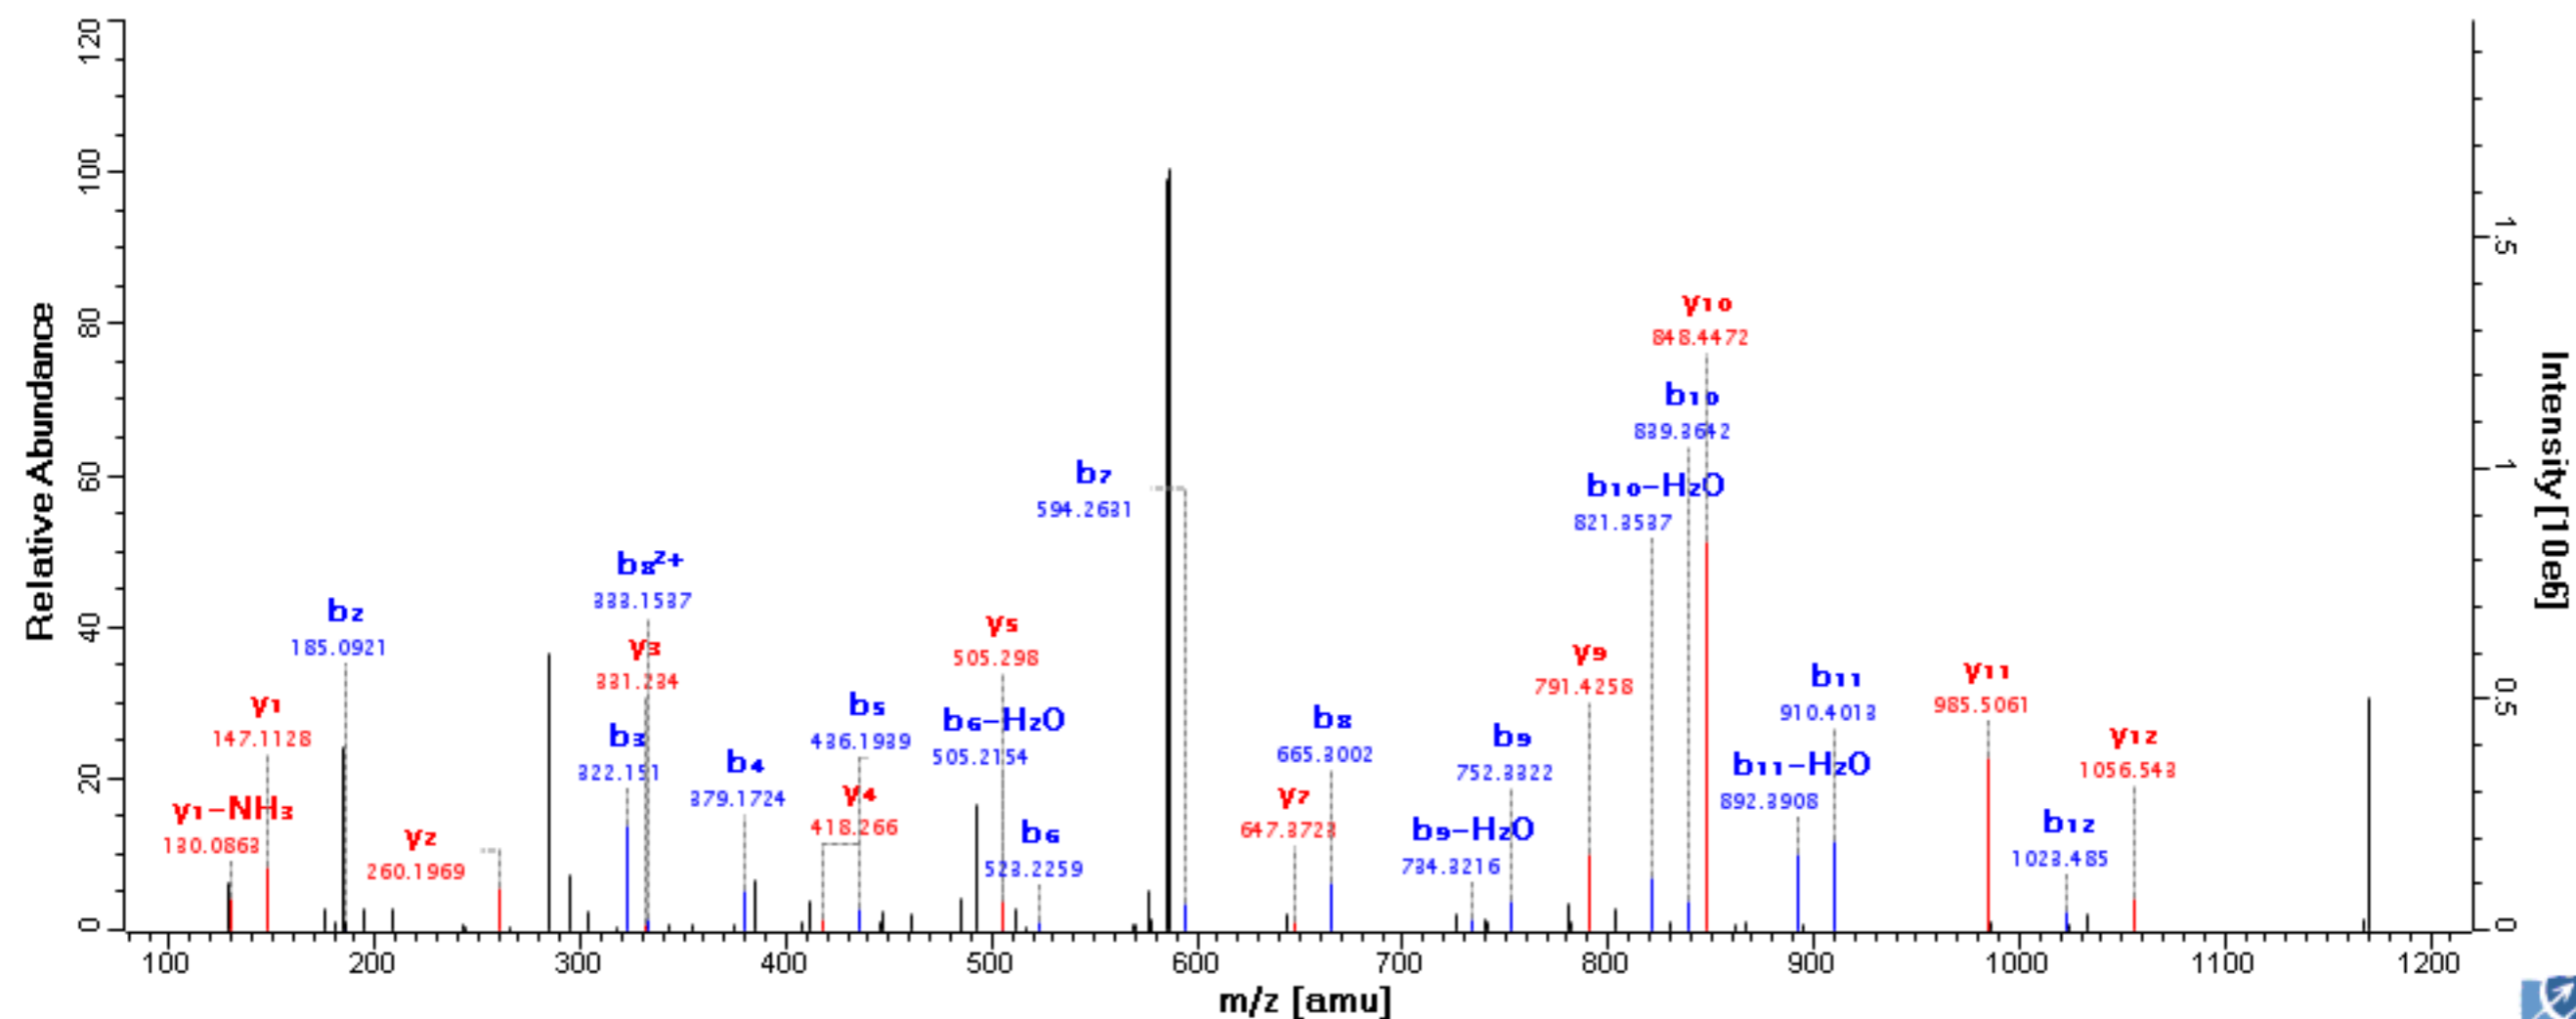

Source: Bibo\_20130531\_RM\_MSC07627\_1\_3  
 Scannumber: 8982  
 Protein: PCM1; hCG\_28254; PCM1; PCM1; PCM1; PCM1; Q15154-1; Q15154; A6NNN6; B9EI55; D3DSQ0; E7ETA6; Q15154-2; Q15154; A2RUU9; C9JGS5; E7EV56; Q15154-3; Q15154; E7EV93; C9JB  
 Peptide Score: 131.06  
 Method: FTMS; HCD; 1

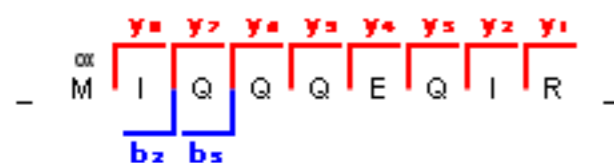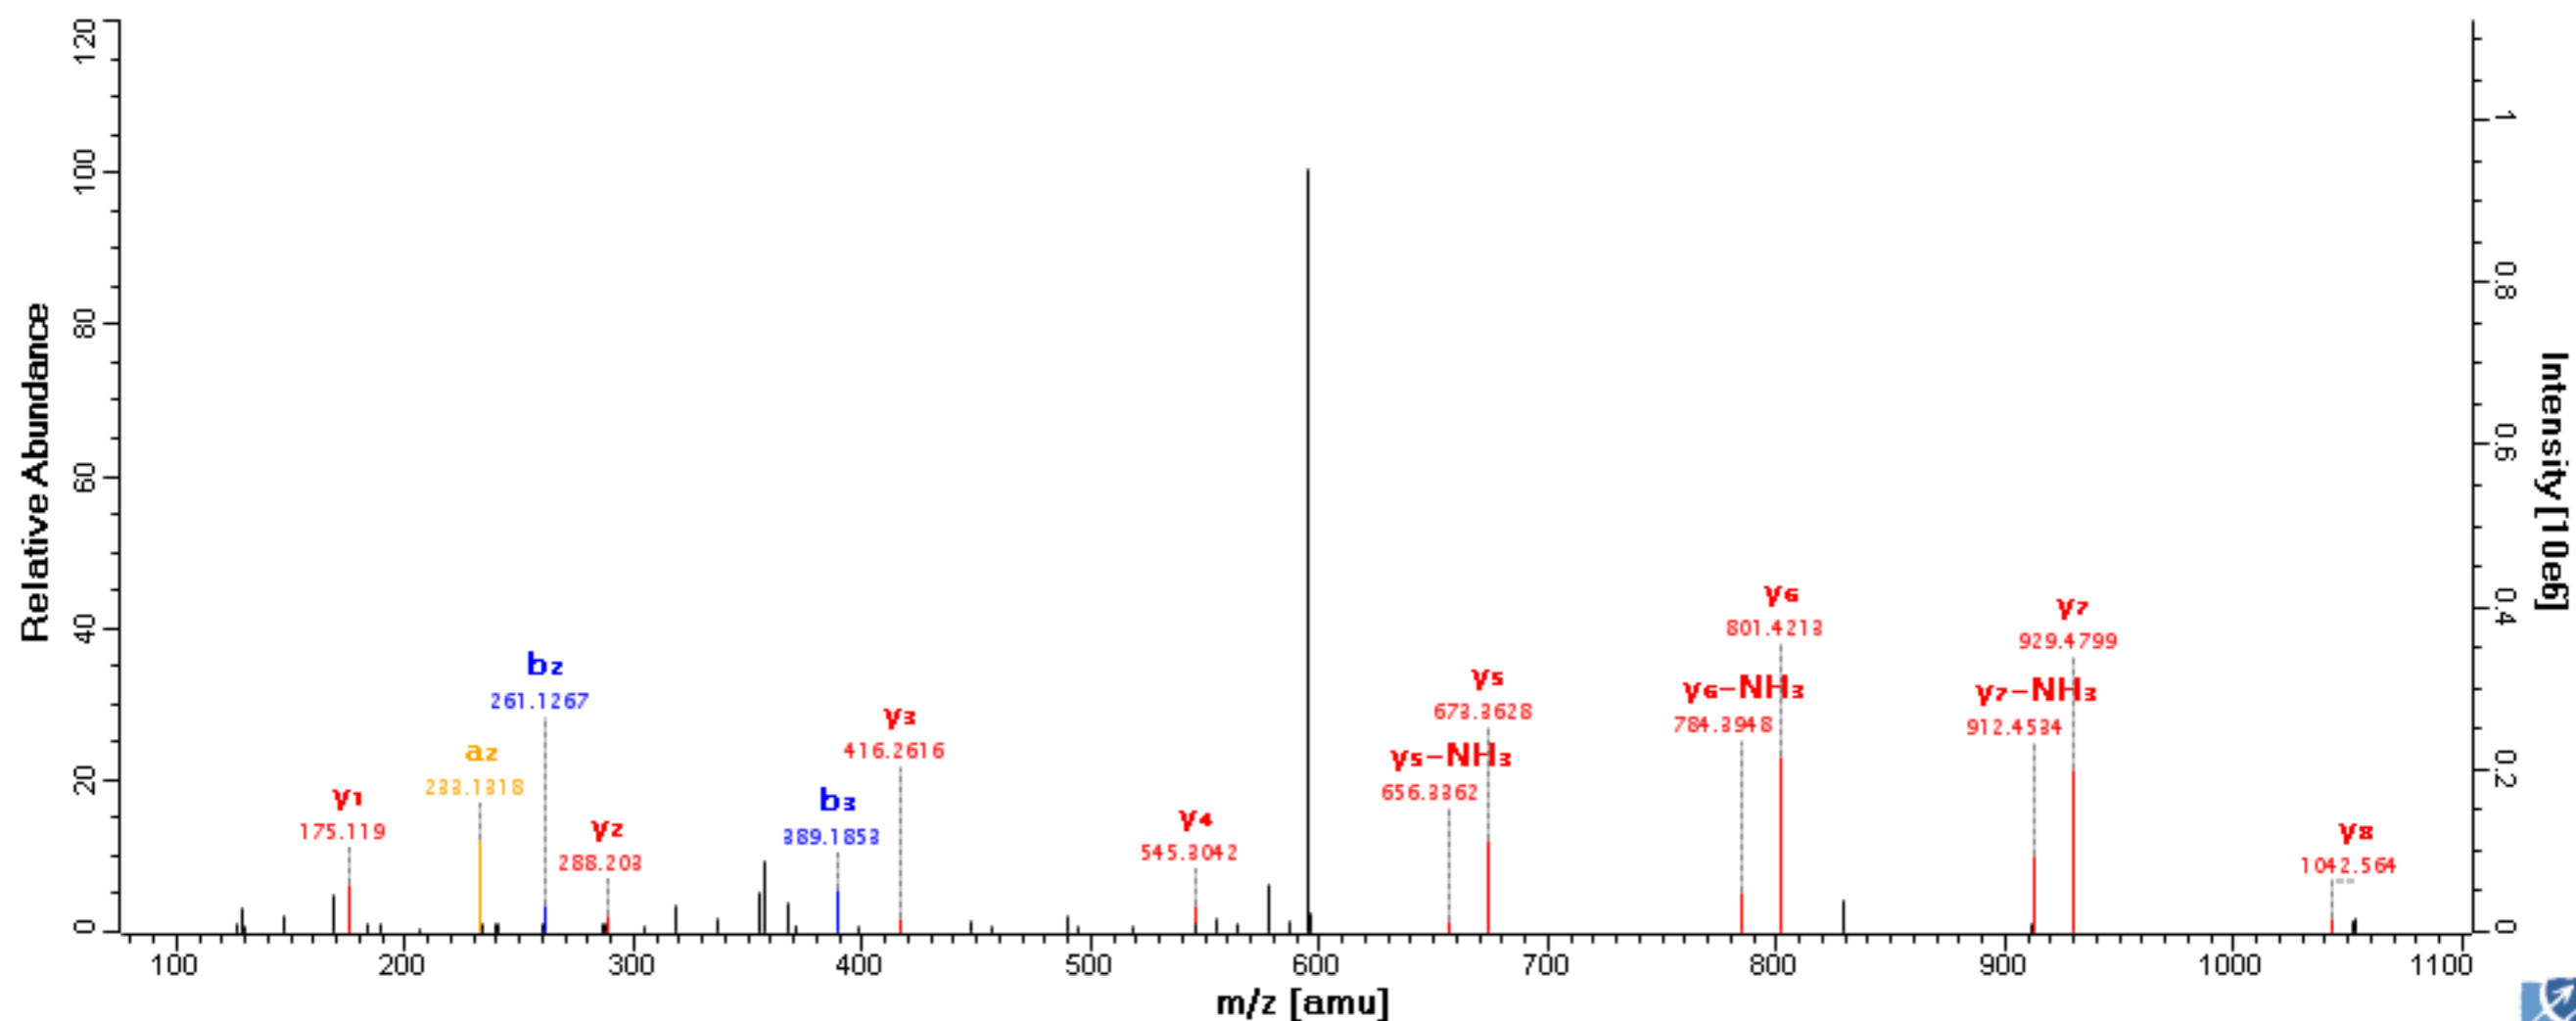

Source: Bibo\_20130531\_RM\_MSC07627\_1\_3  
 Scannumber: 11397  
 Protein: SEC22B; SEC22L1; O75396  
 Peptide Score: 94.69  
 Method: FTMS; HCD; 1

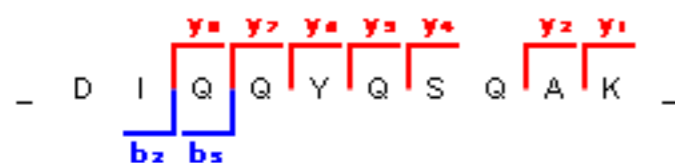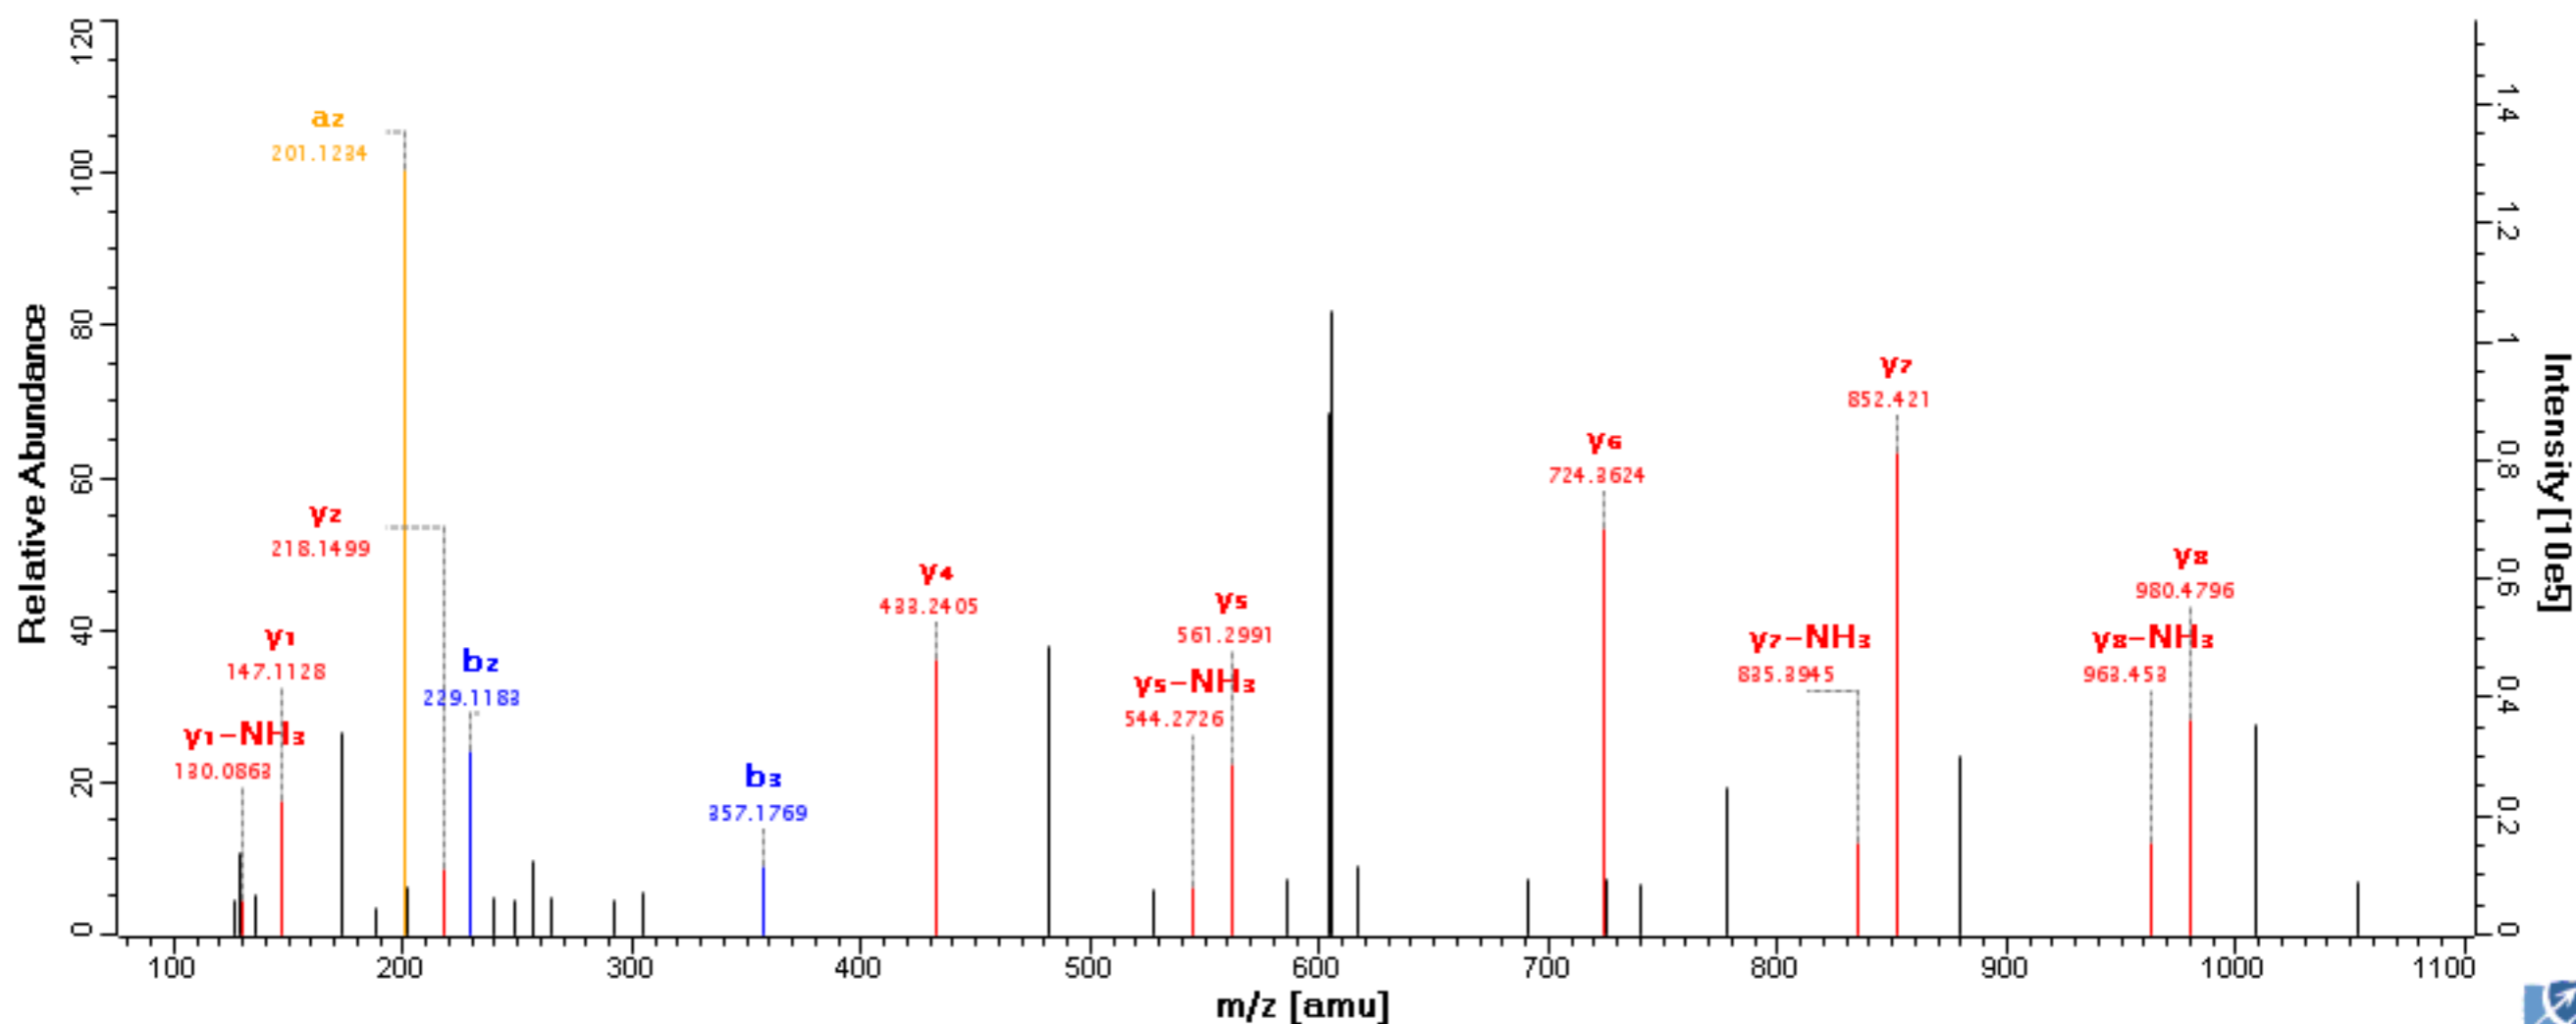

Source: Bibo\_20130531\_RM\_MSC07627\_1\_3  
 Scannumber: 12892  
 Protein: OTUD5; OTUD5; OTUD5; Q96G74-1; Q96G74; Q96G74-3; Q96G74; Q96G74-2; Q96G74; B4DGG7  
 Peptide Score: 100.55  
 Method: FTMS; HCD; 1

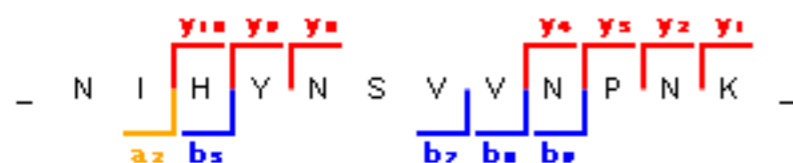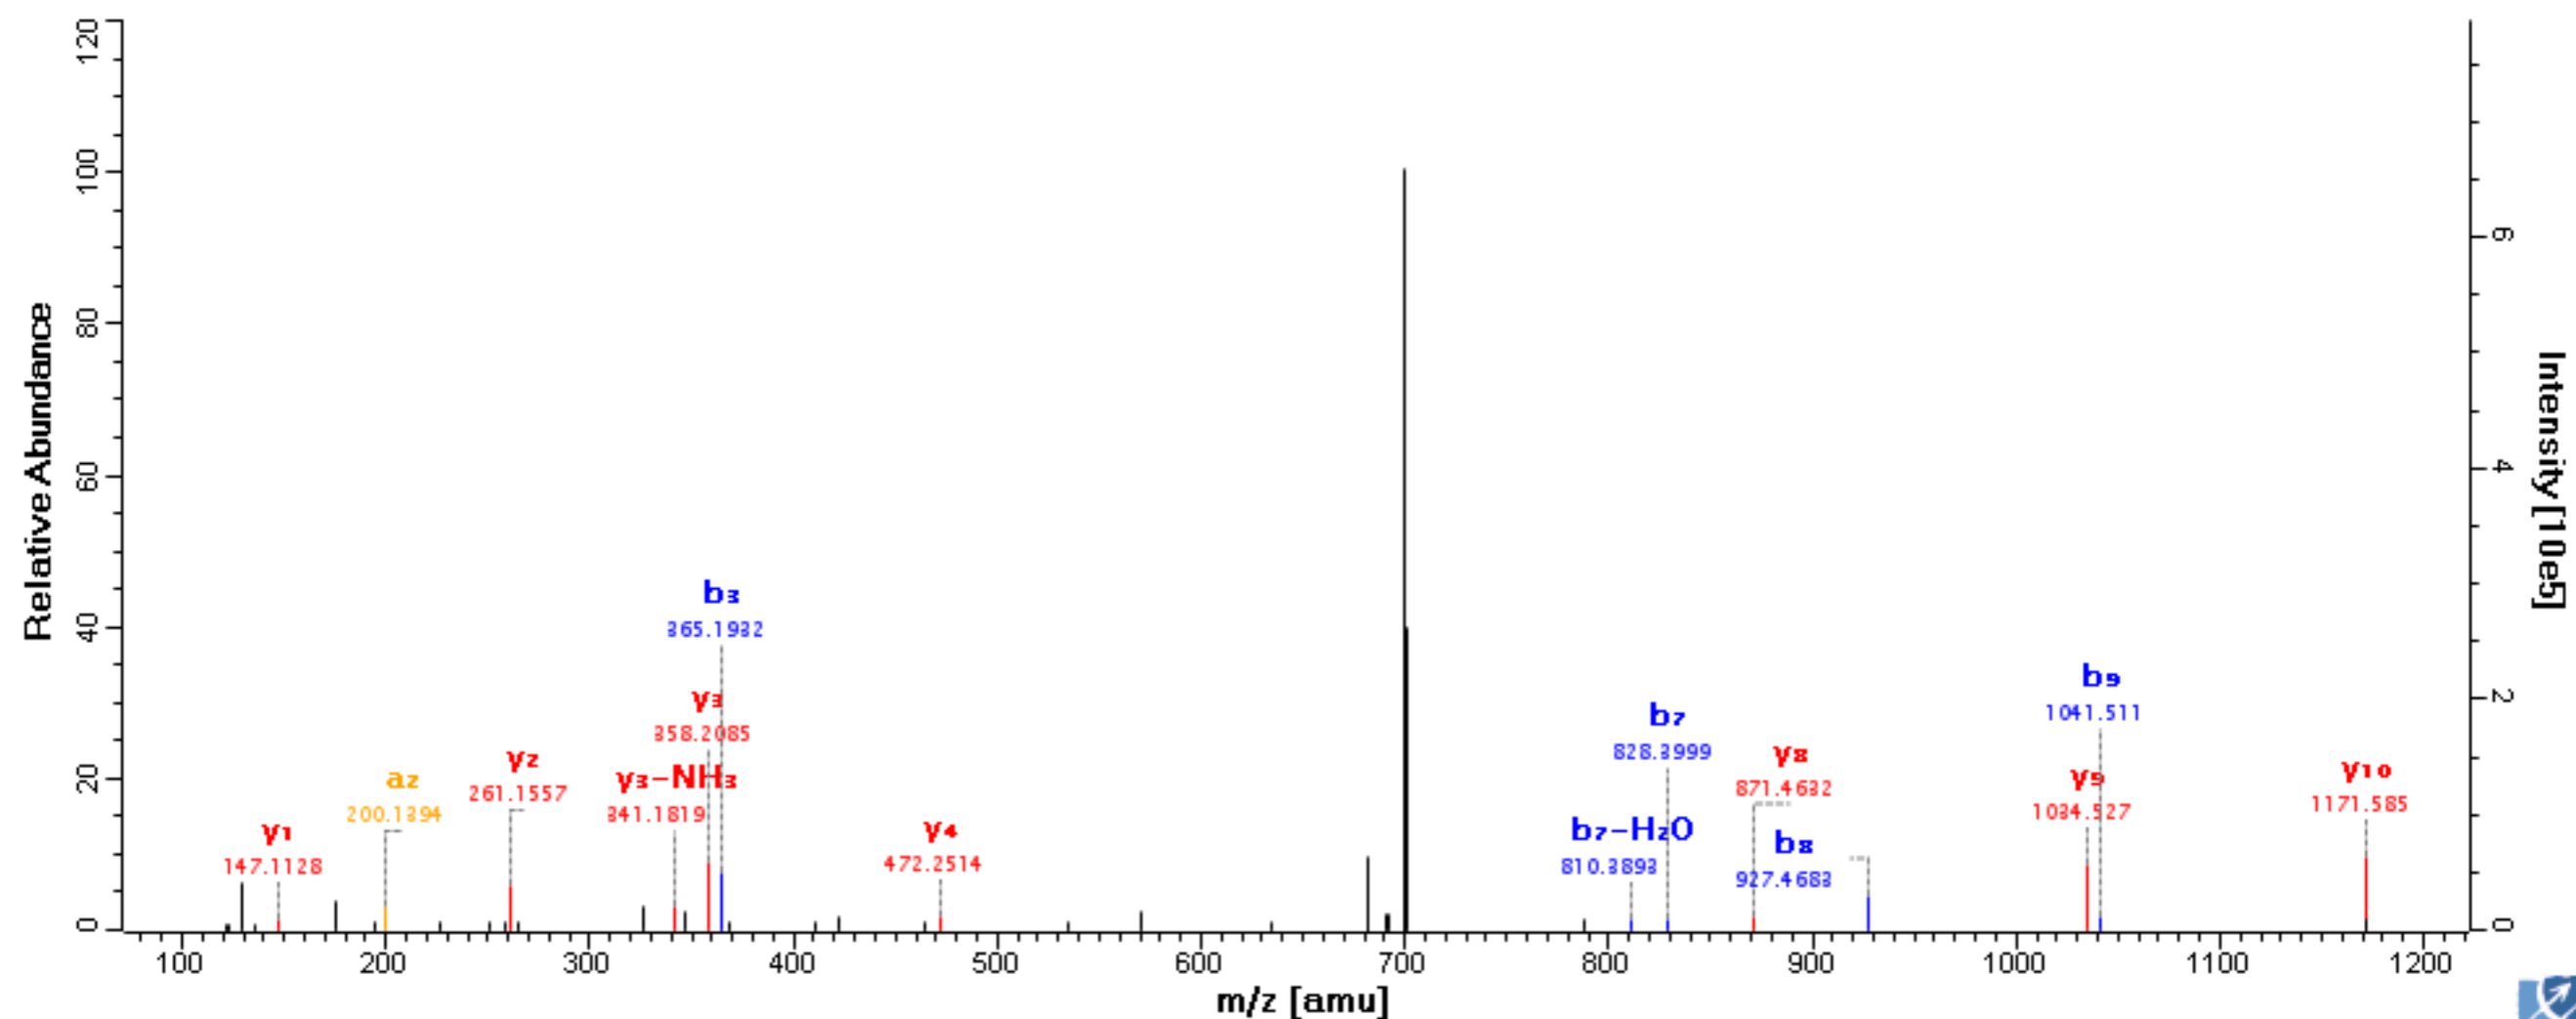

Source: Bibo\_20130531\_RM\_MSC07627\_1\_3

Scannumber: 12902

Protein: SPTB2; SPTBN1; hCG\_17370; SPTB2; SPTBN1; SPTB2; SPTBN1; Q01082-1; Q01082; B2ZZ89; B4DIF8; D6W5C0; Q01082-2; Q01082; Q01082-3; Q01082; Q8WYB3

Peptide Score: 103.7

Method: FTMS; HCD; 1

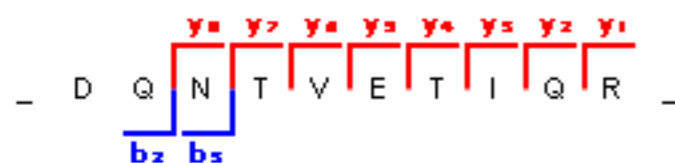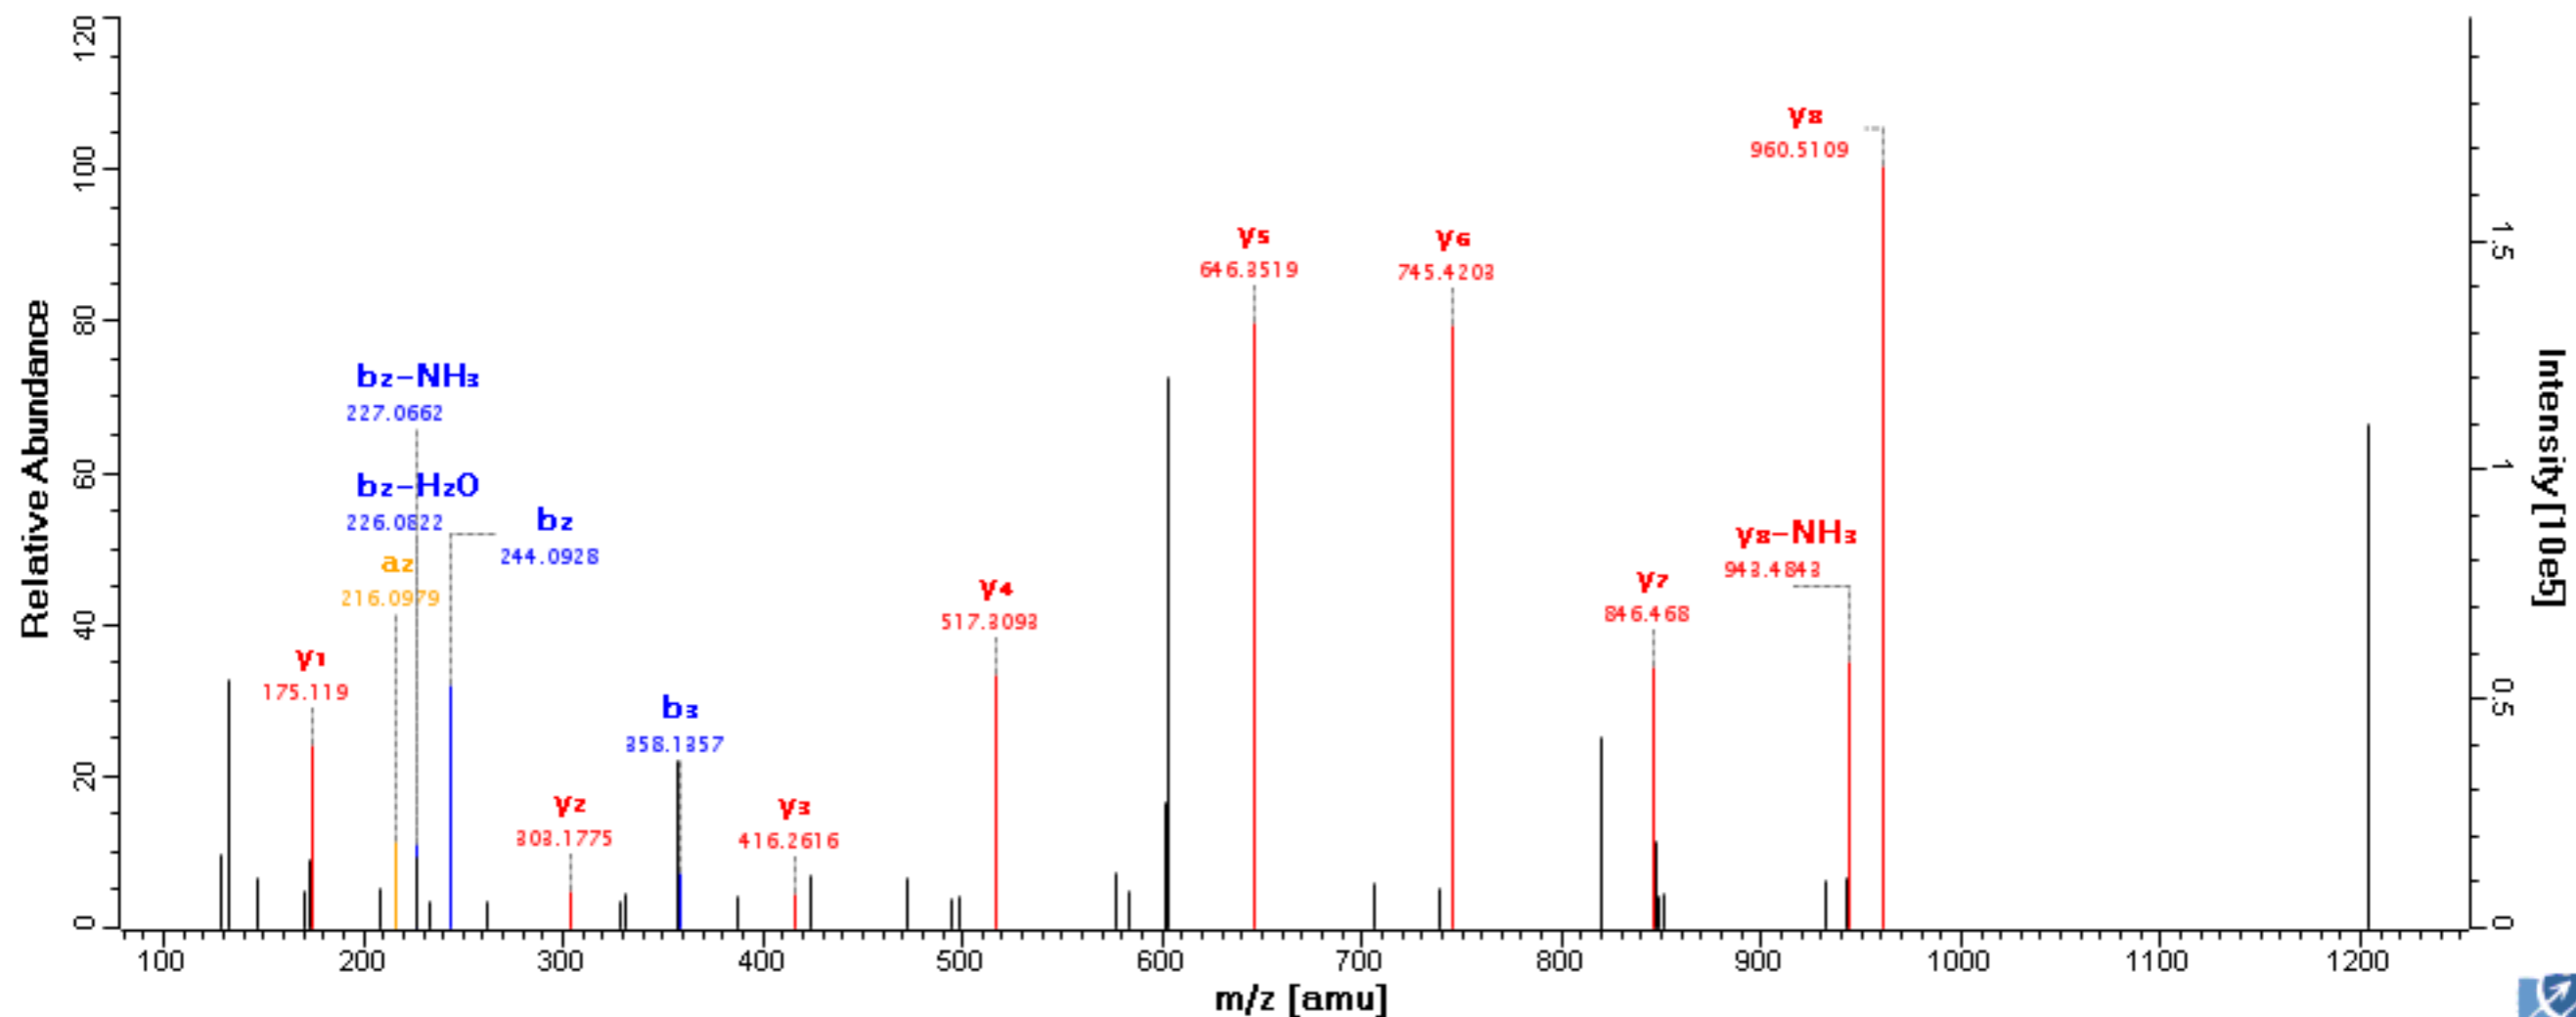

Source: Bibo\_20130531\_RM\_MSC07627\_1\_3

Scannumber: 13365

Protein: KIAA1835; RANGAP1; SD; RANGAP1; RP4-756G23.7-007; RANGAP1; RP4-756G23.7-009; RANGAP1; RP4-756G23.7-008; P46060; BOQYT3; B4DY16; B4E0U0; Q8WU57; Q9BSK3; BOQYT4; E

Peptide Score: 112.13

Method: FTMS; HCD; 1

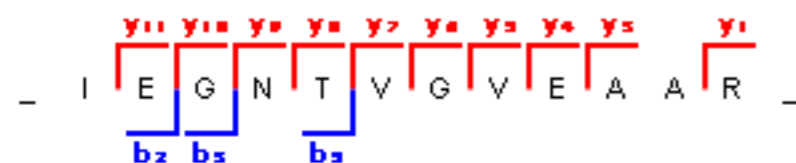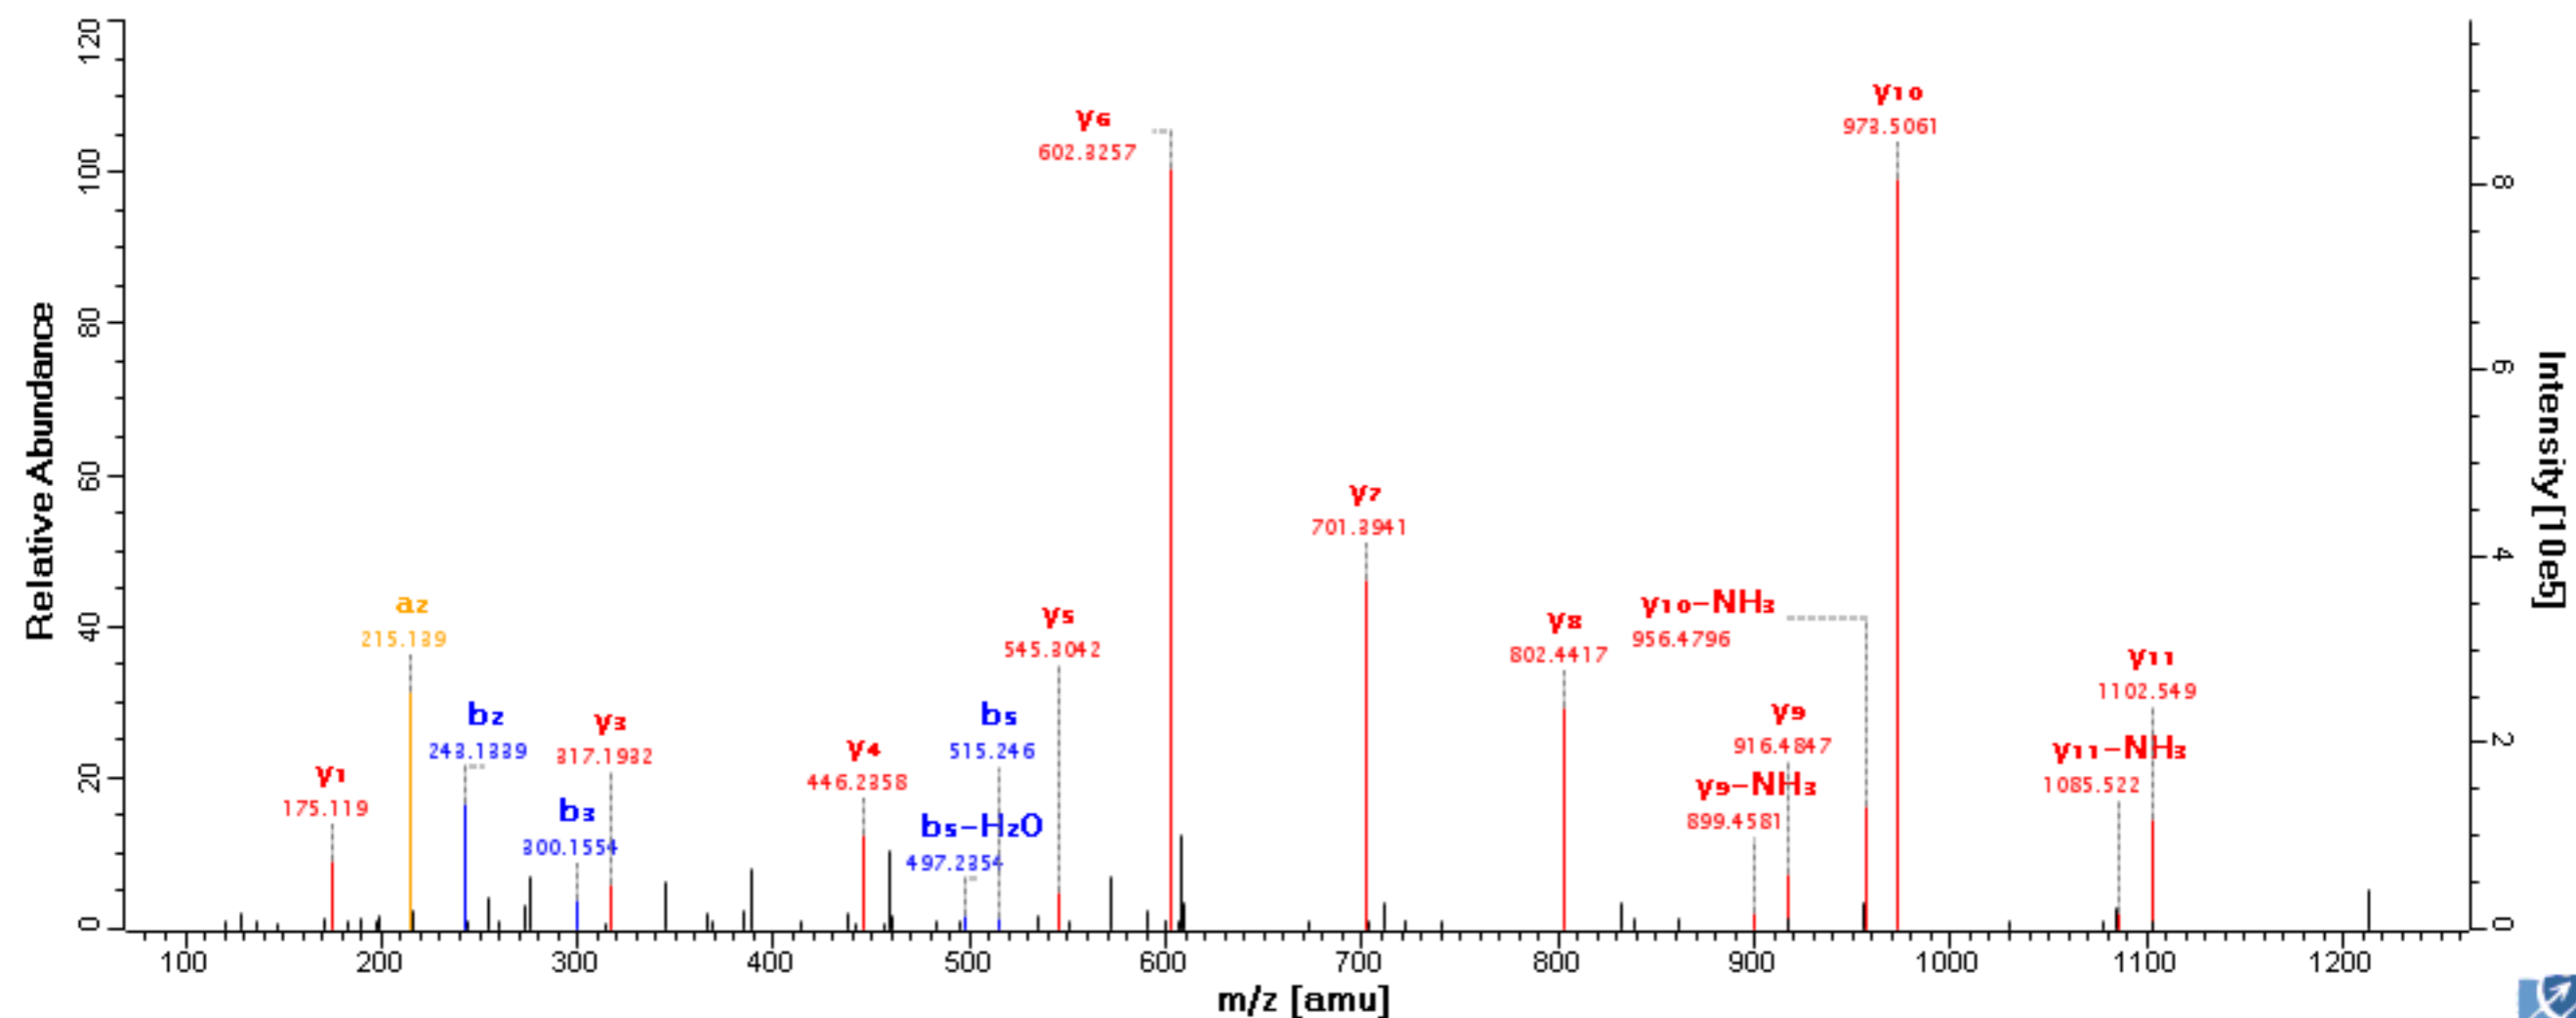

Source: Bibo\_20130531\_RM\_MSC07627\_1\_3  
 Scannumber: 14718  
 Protein: E5RG04  
 Peptide Score: 79.82  
 Method: FTMS; HCD; 1

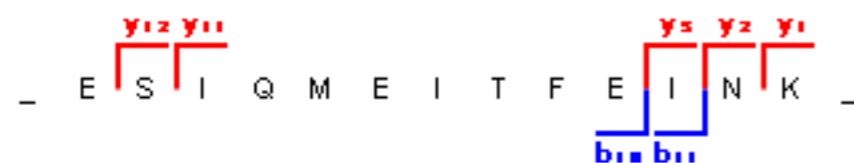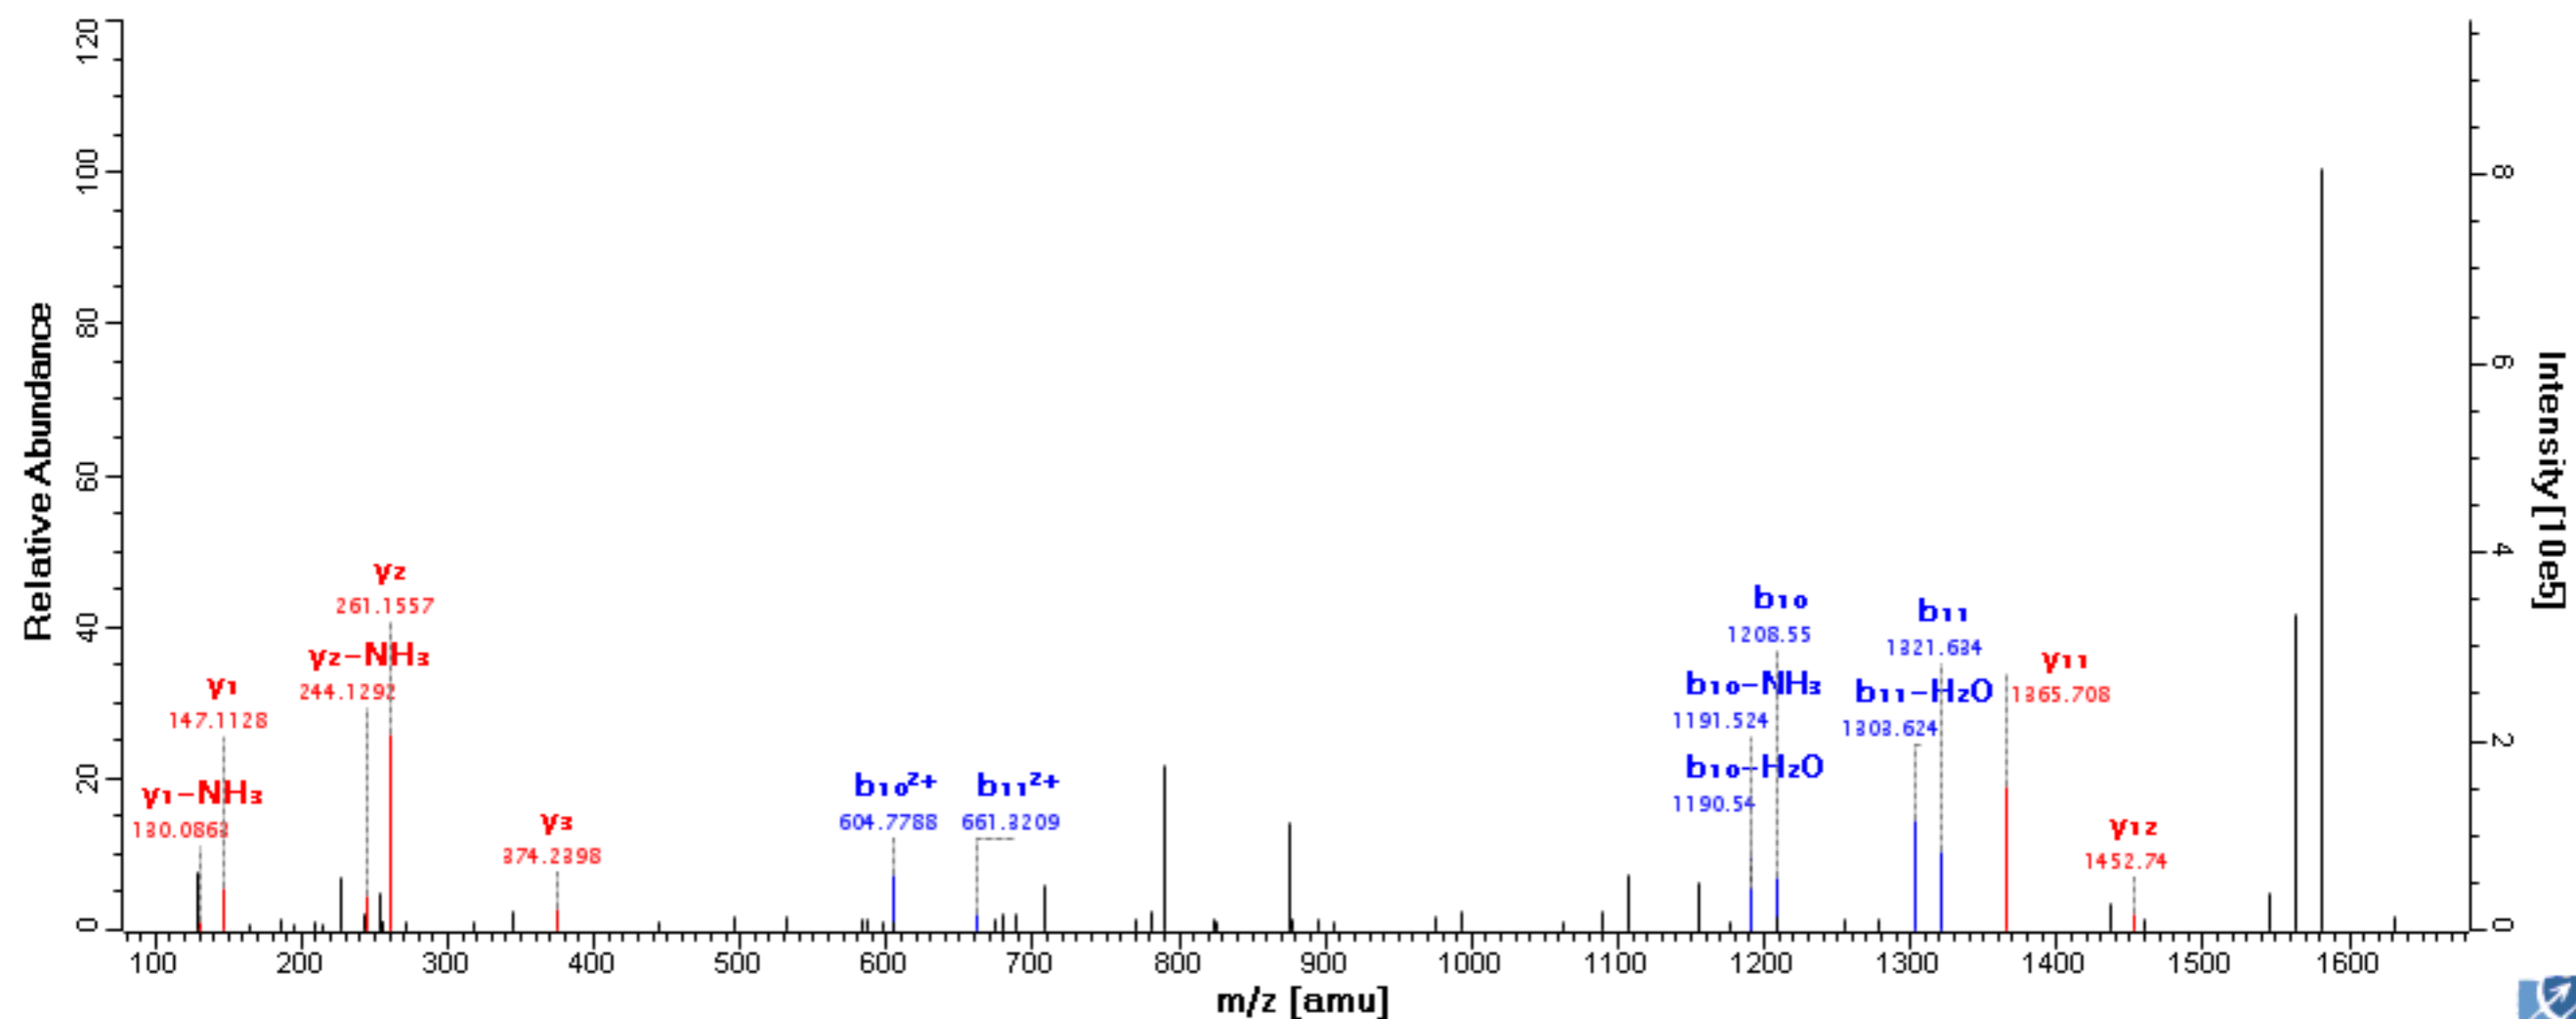

Source: Bibo\_20130531\_RM\_MSC07627\_1\_3  
 Scannumber: 15093  
 Protein: DAL1; EPB41L3; KIAA0987; DAL1; EPB41L3; KIAA0987; Q9Y2J2-1; Q9Y2J2; B7Z4I5; Q9Y2J2-2; Q9Y2J2; B3KY28; A8K968; B2RBO2; B3KT50; E7EUF8; B7Z2D7; B7Z8M8; B7Z2G3  
 Peptide Score: 102.4  
 Method: FTMS; HCD; 1

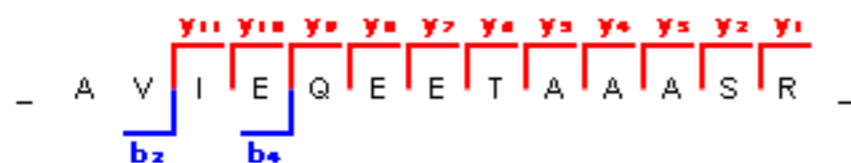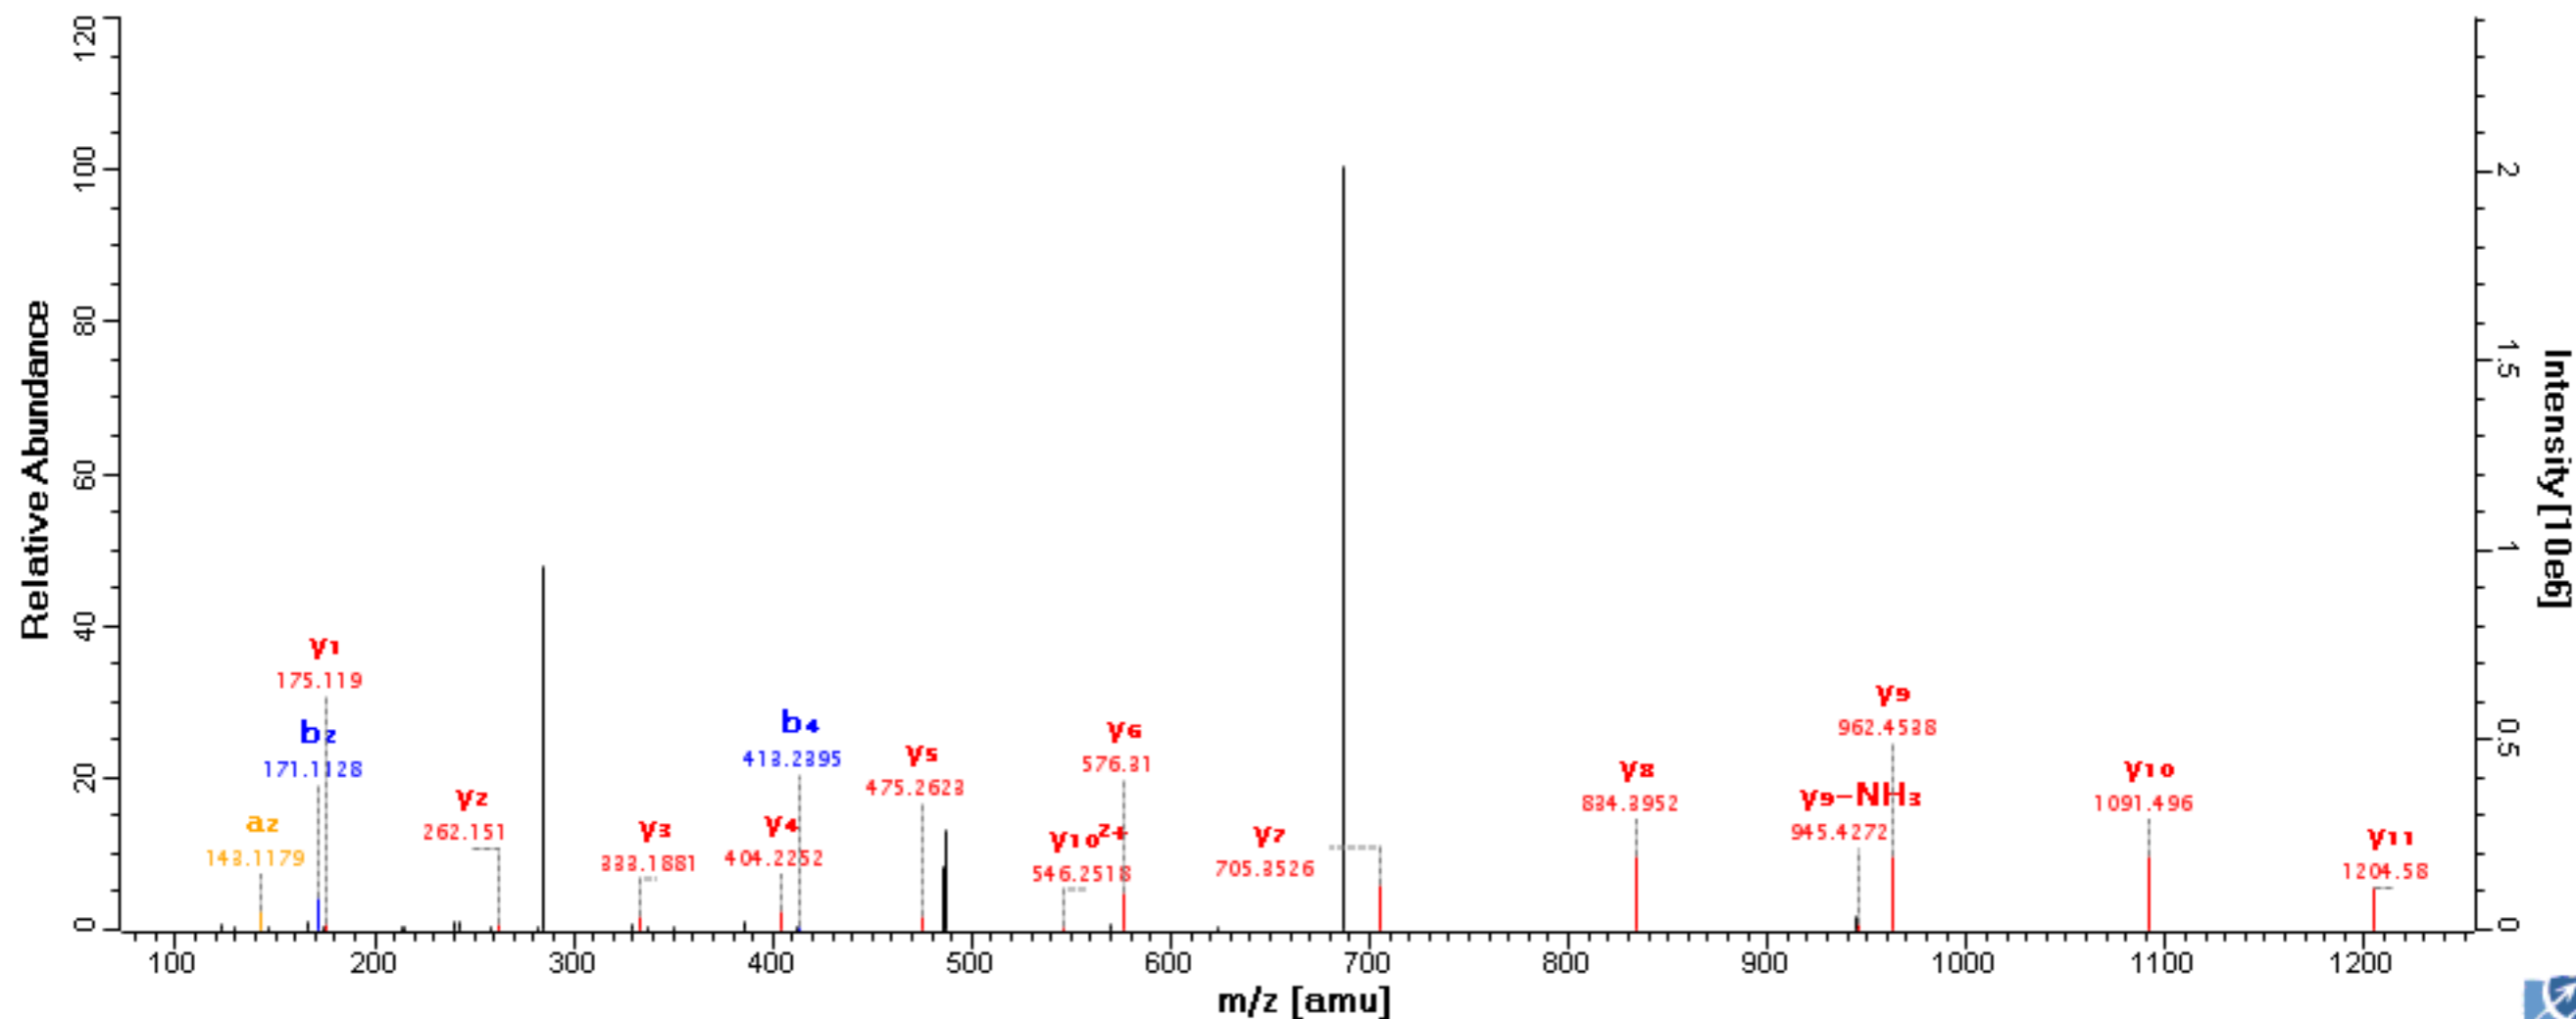

Source: Bibo\_20130531\_RM\_MSC07627\_1\_3  
Scannumber: 15302  
Protein: E5RG04  
Peptide Score: 89.4  
Method: FTMS; HCD; 1

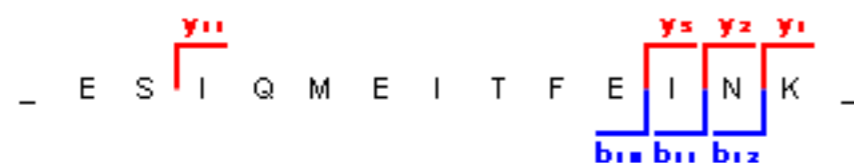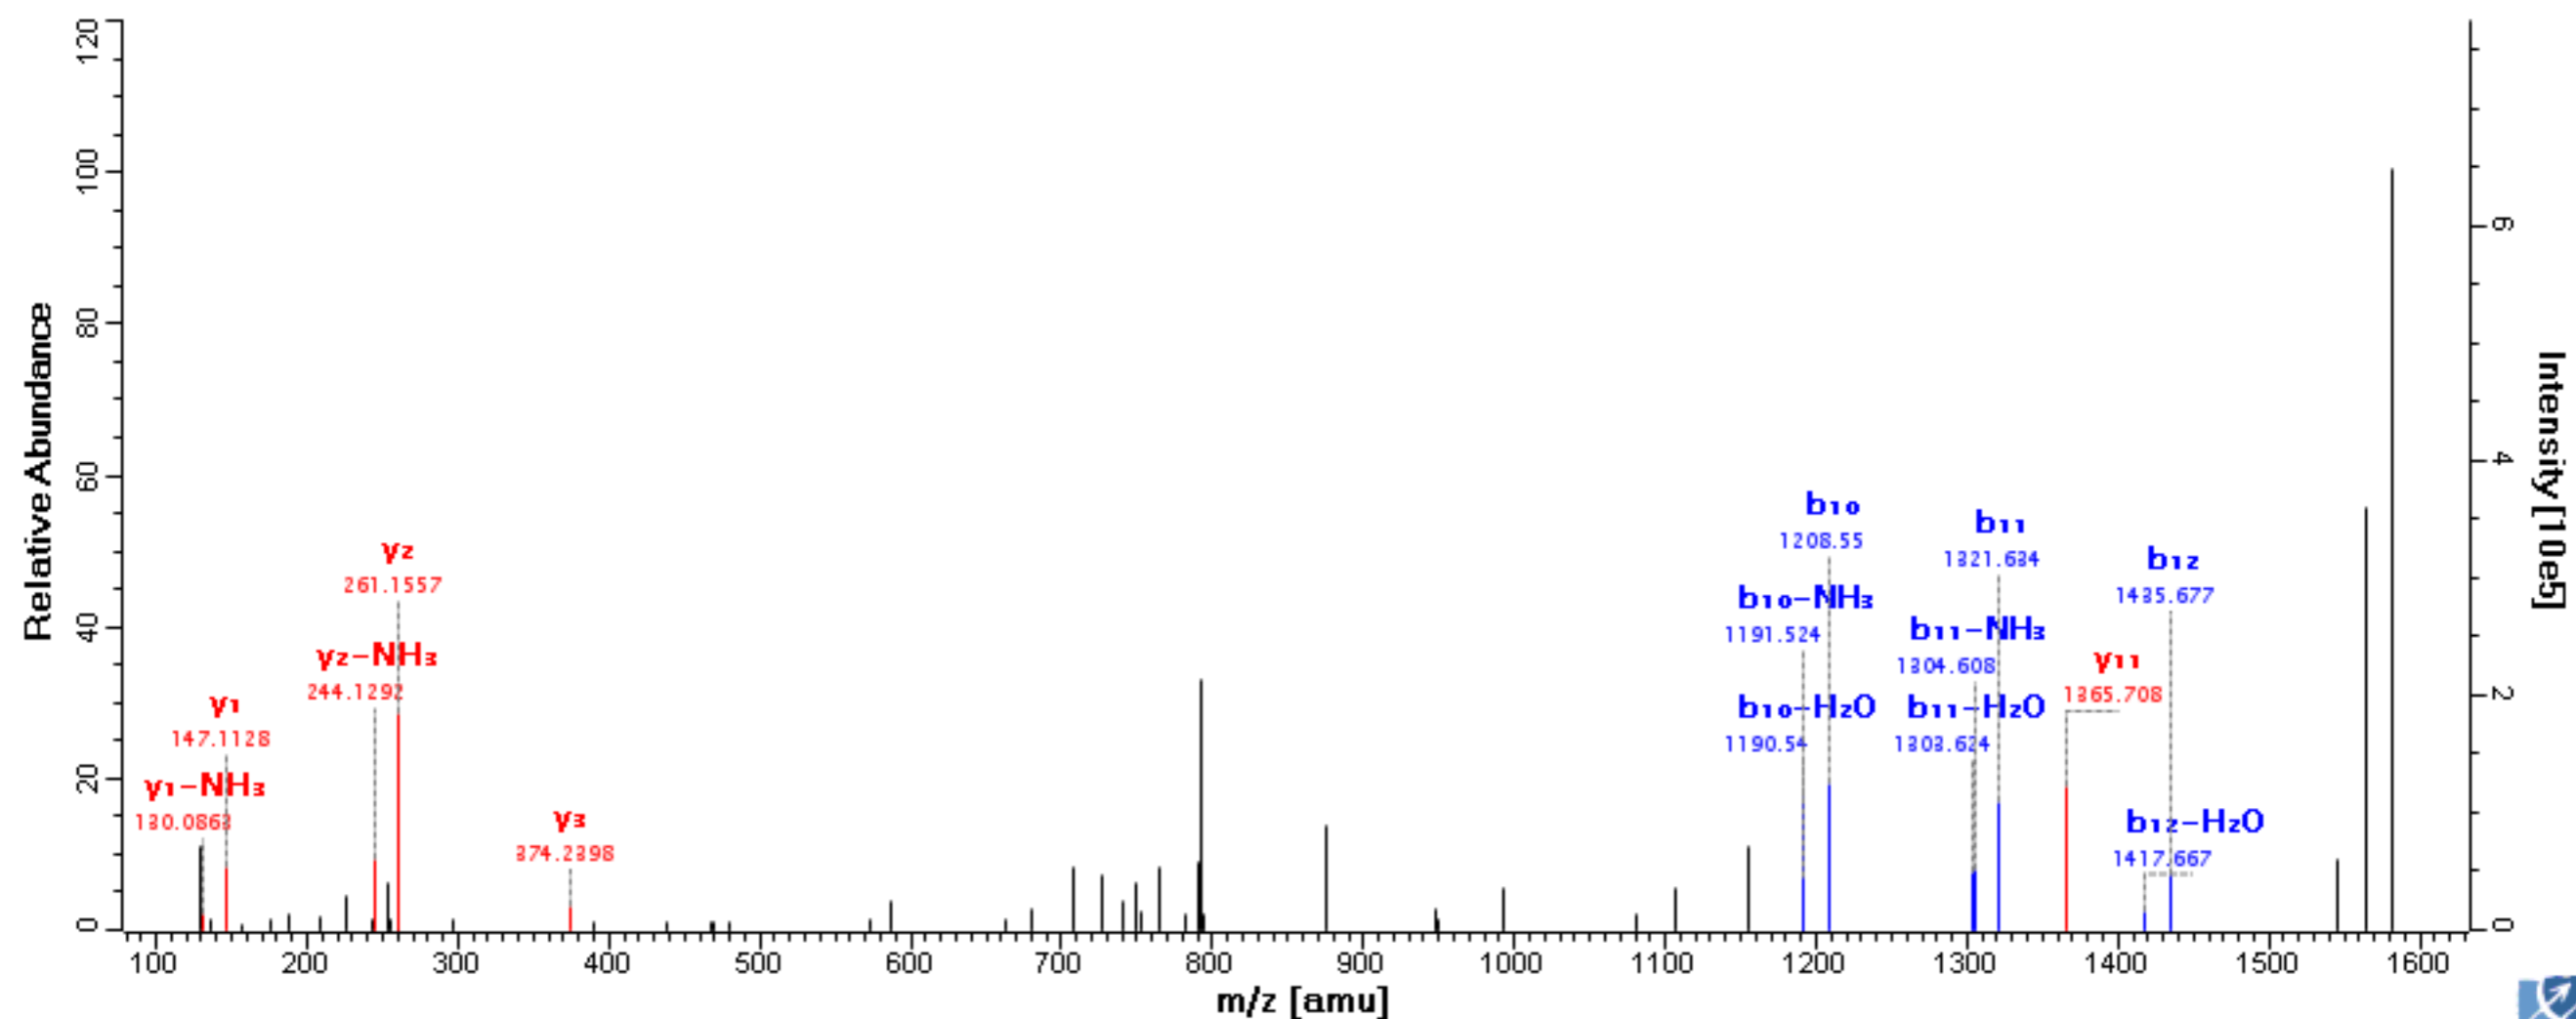

Source: Bibo\_20130531\_RM\_MSC07627\_1\_3  
 Scannumber: 15506  
 Protein: E5RG04  
 Peptide Score: 99.22  
 Method: FTMS; HCD; 1

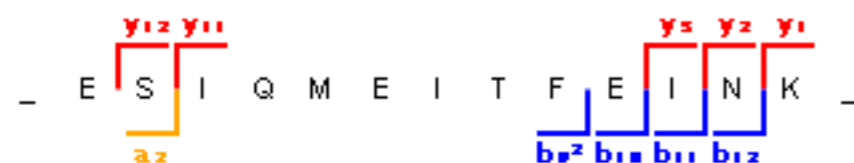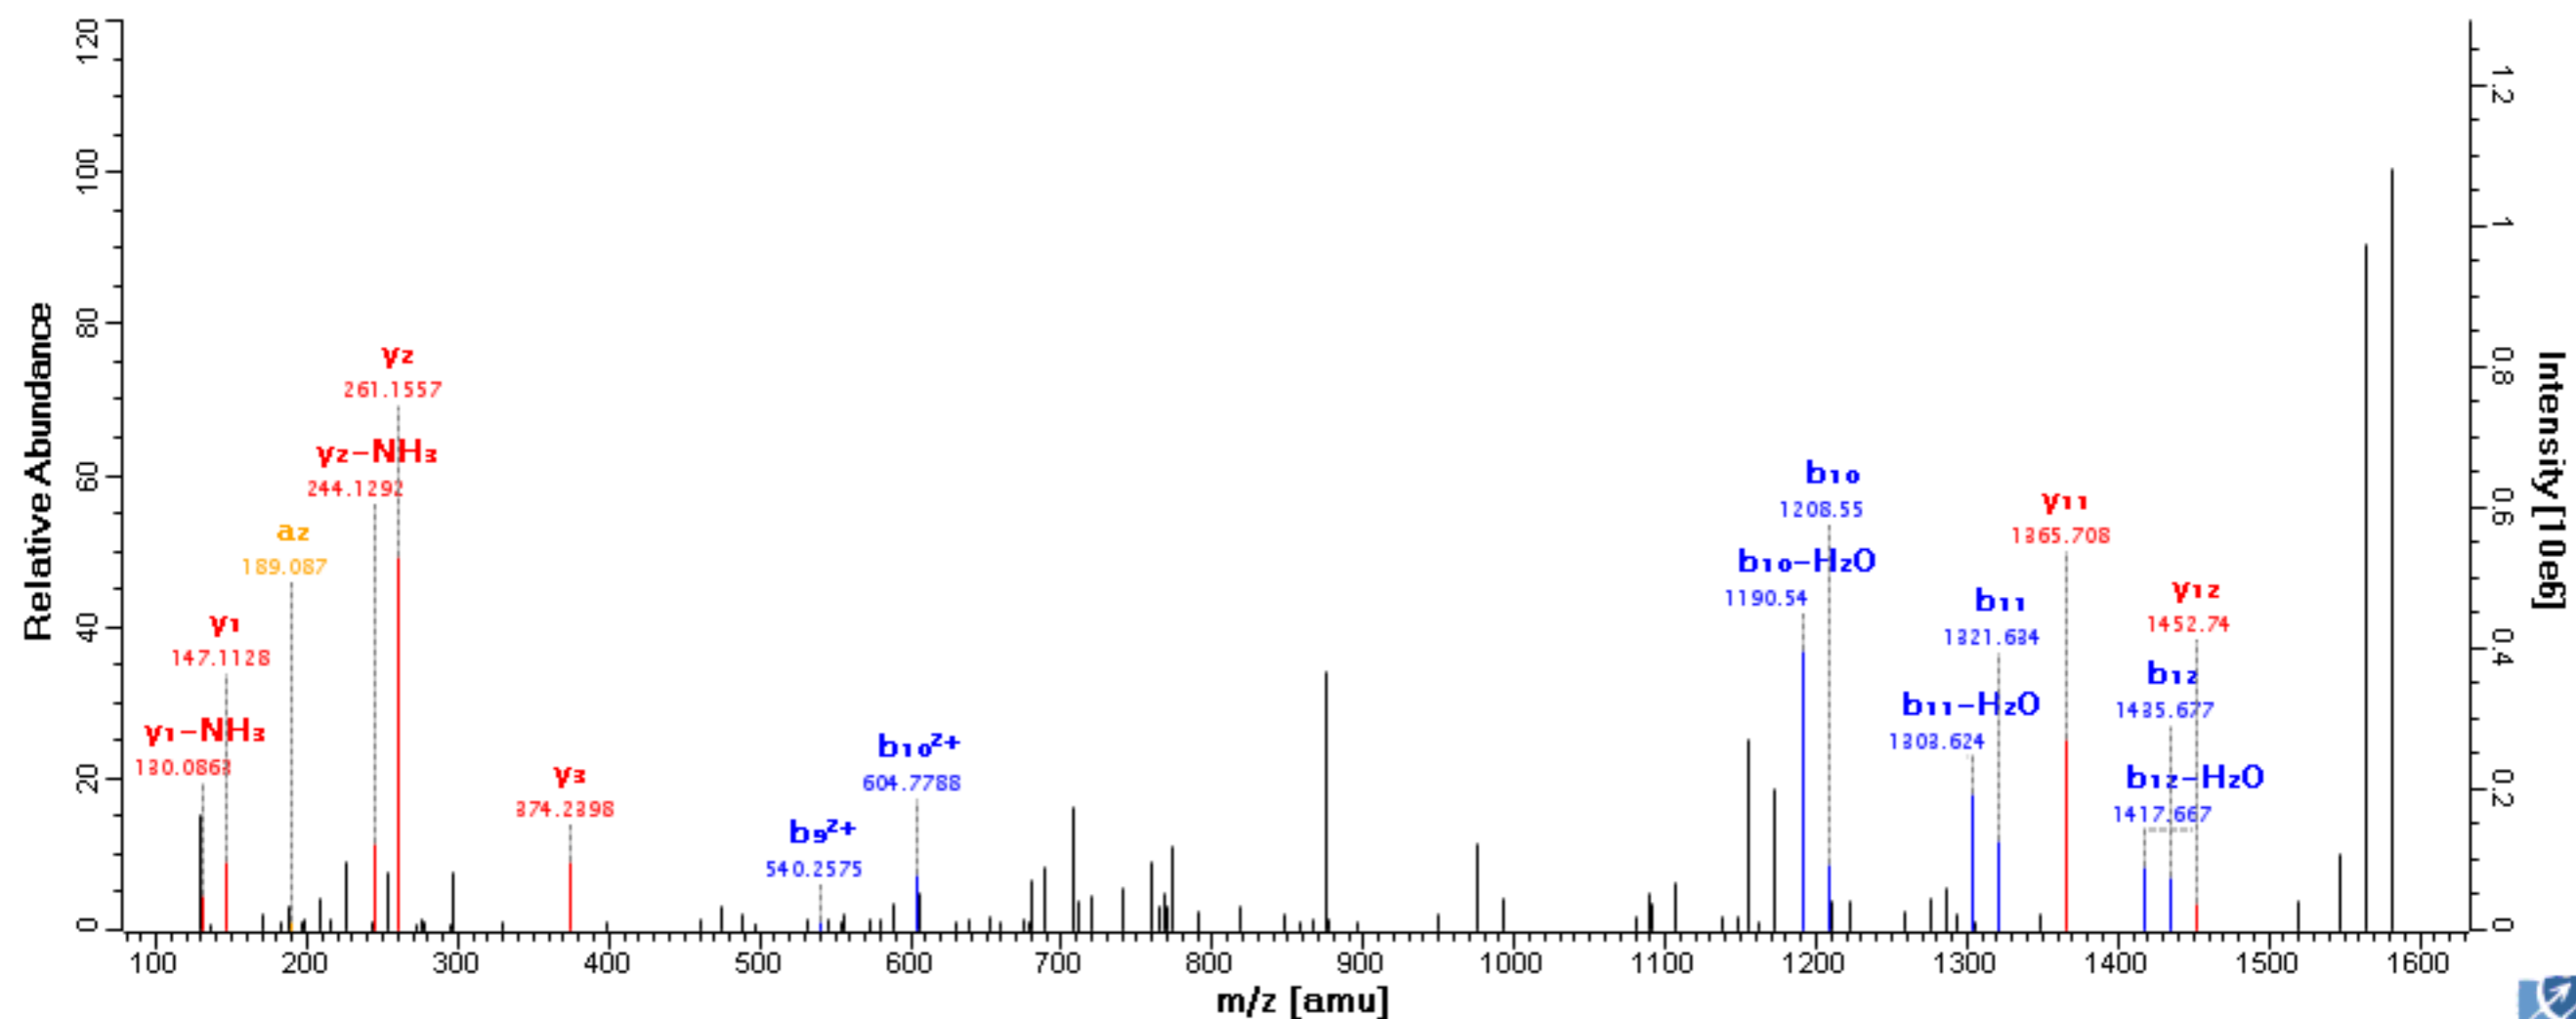

Source: Bibo\_20130531\_RM\_MSC07627\_1\_3  
 Scannumber: 16511  
 Protein: CTTNBP2NL; KIAA1433; DKFZp547A023; CTTNBP2NL; RP4-671 G15.1-002; Q9P2B4; B3KM55; Q9NPX3; B1AMN7  
 Peptide Score: 132.78  
 Method: FTMS; HCD; 1

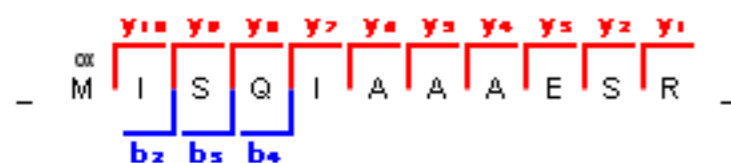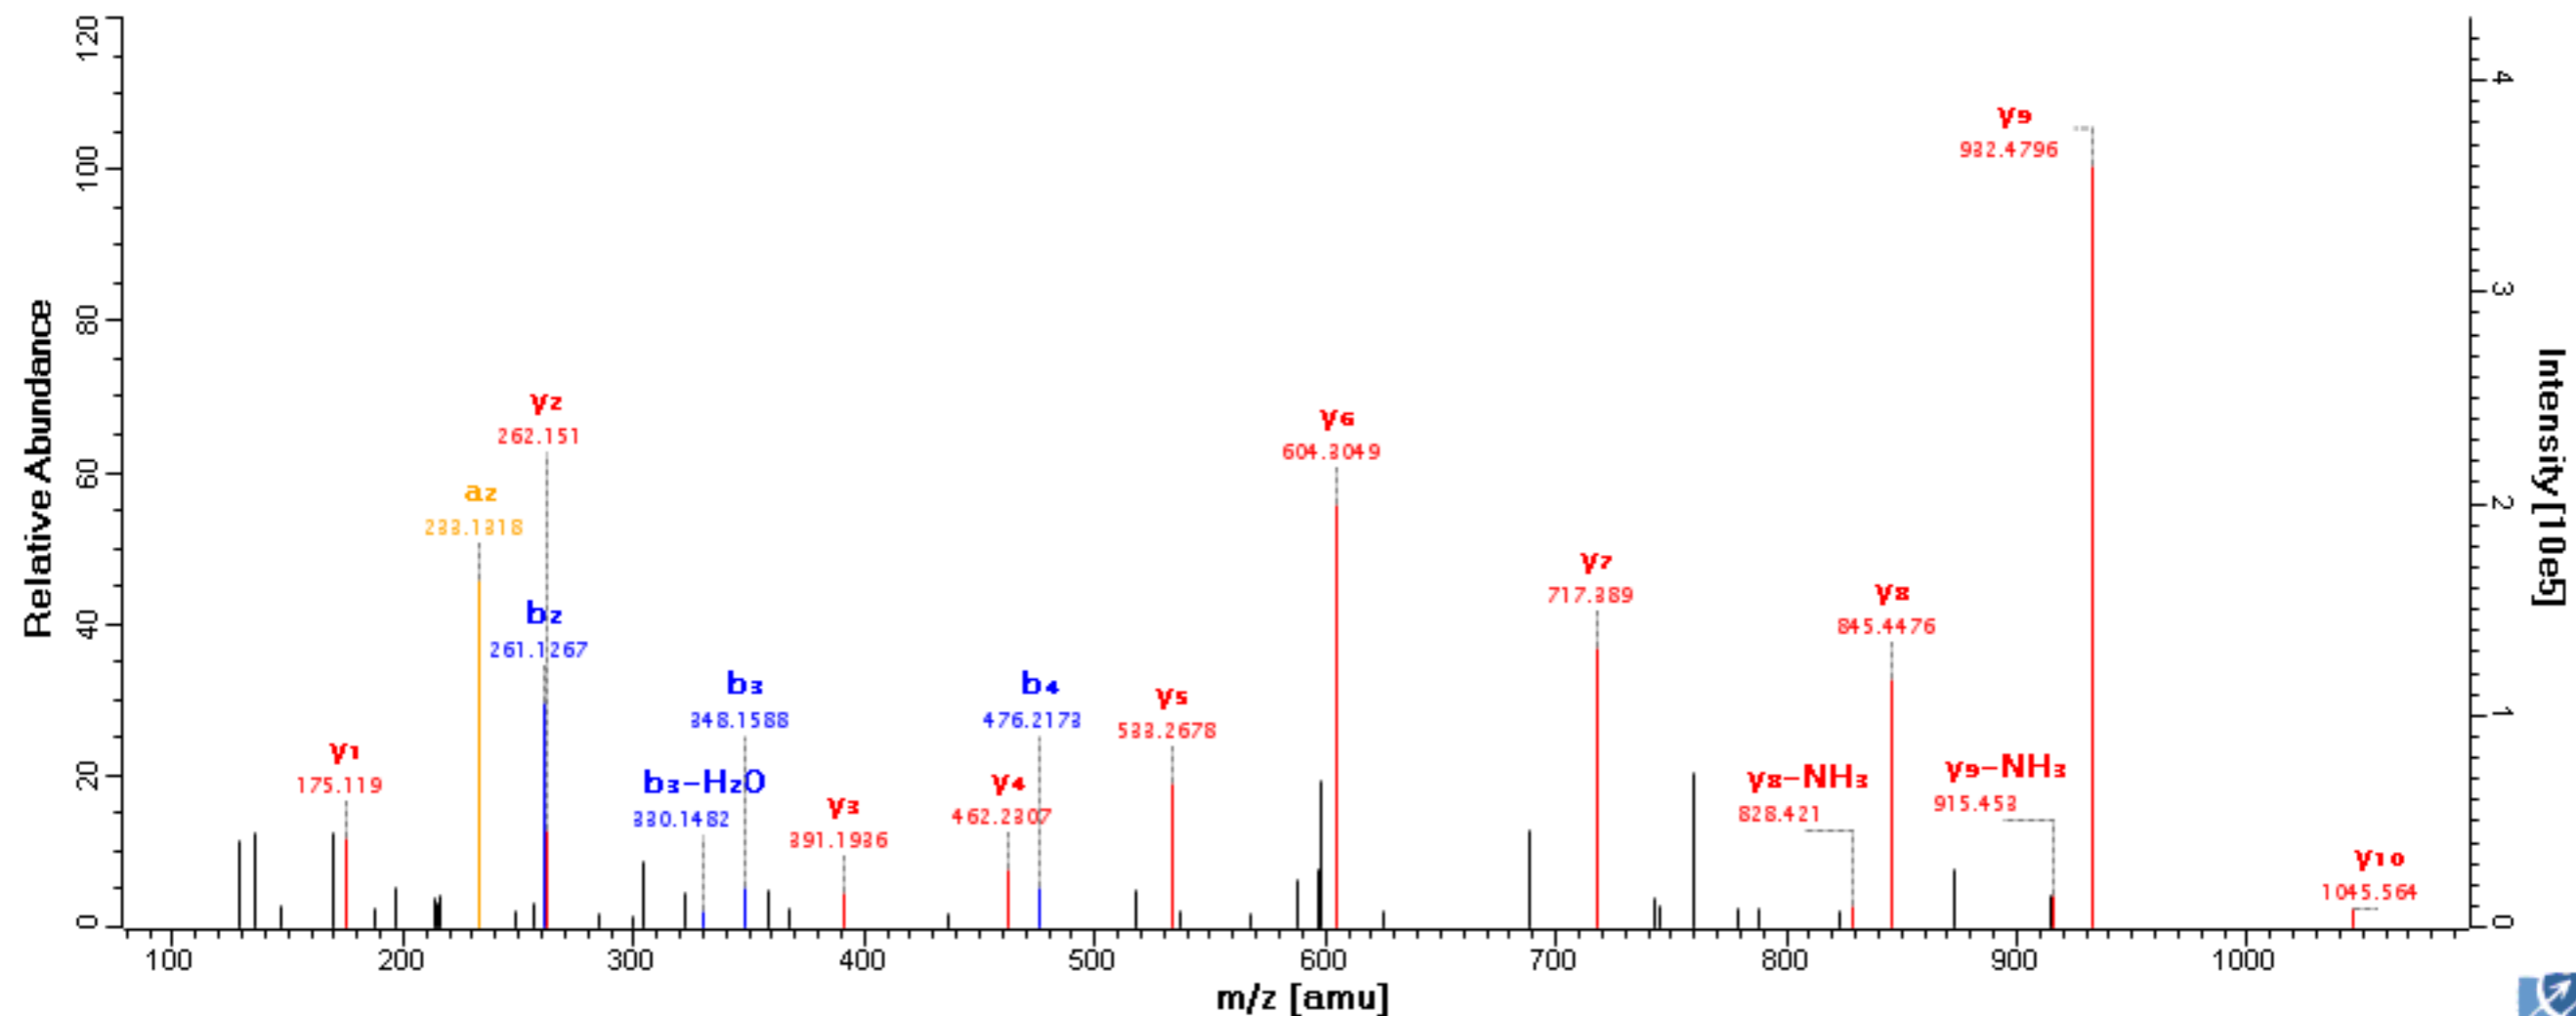

Source: Bibo\_20130531\_RM\_MS07627\_1\_3  
Scannumber: 16590  
Protein: ESRG04  
Peptide Score: 88.19  
Method: FTMS: HCD: 1

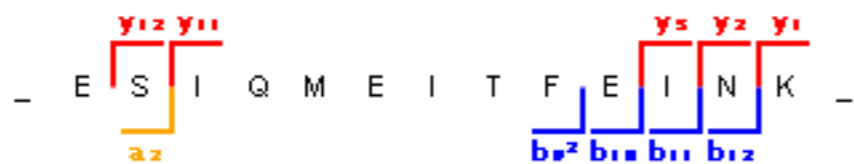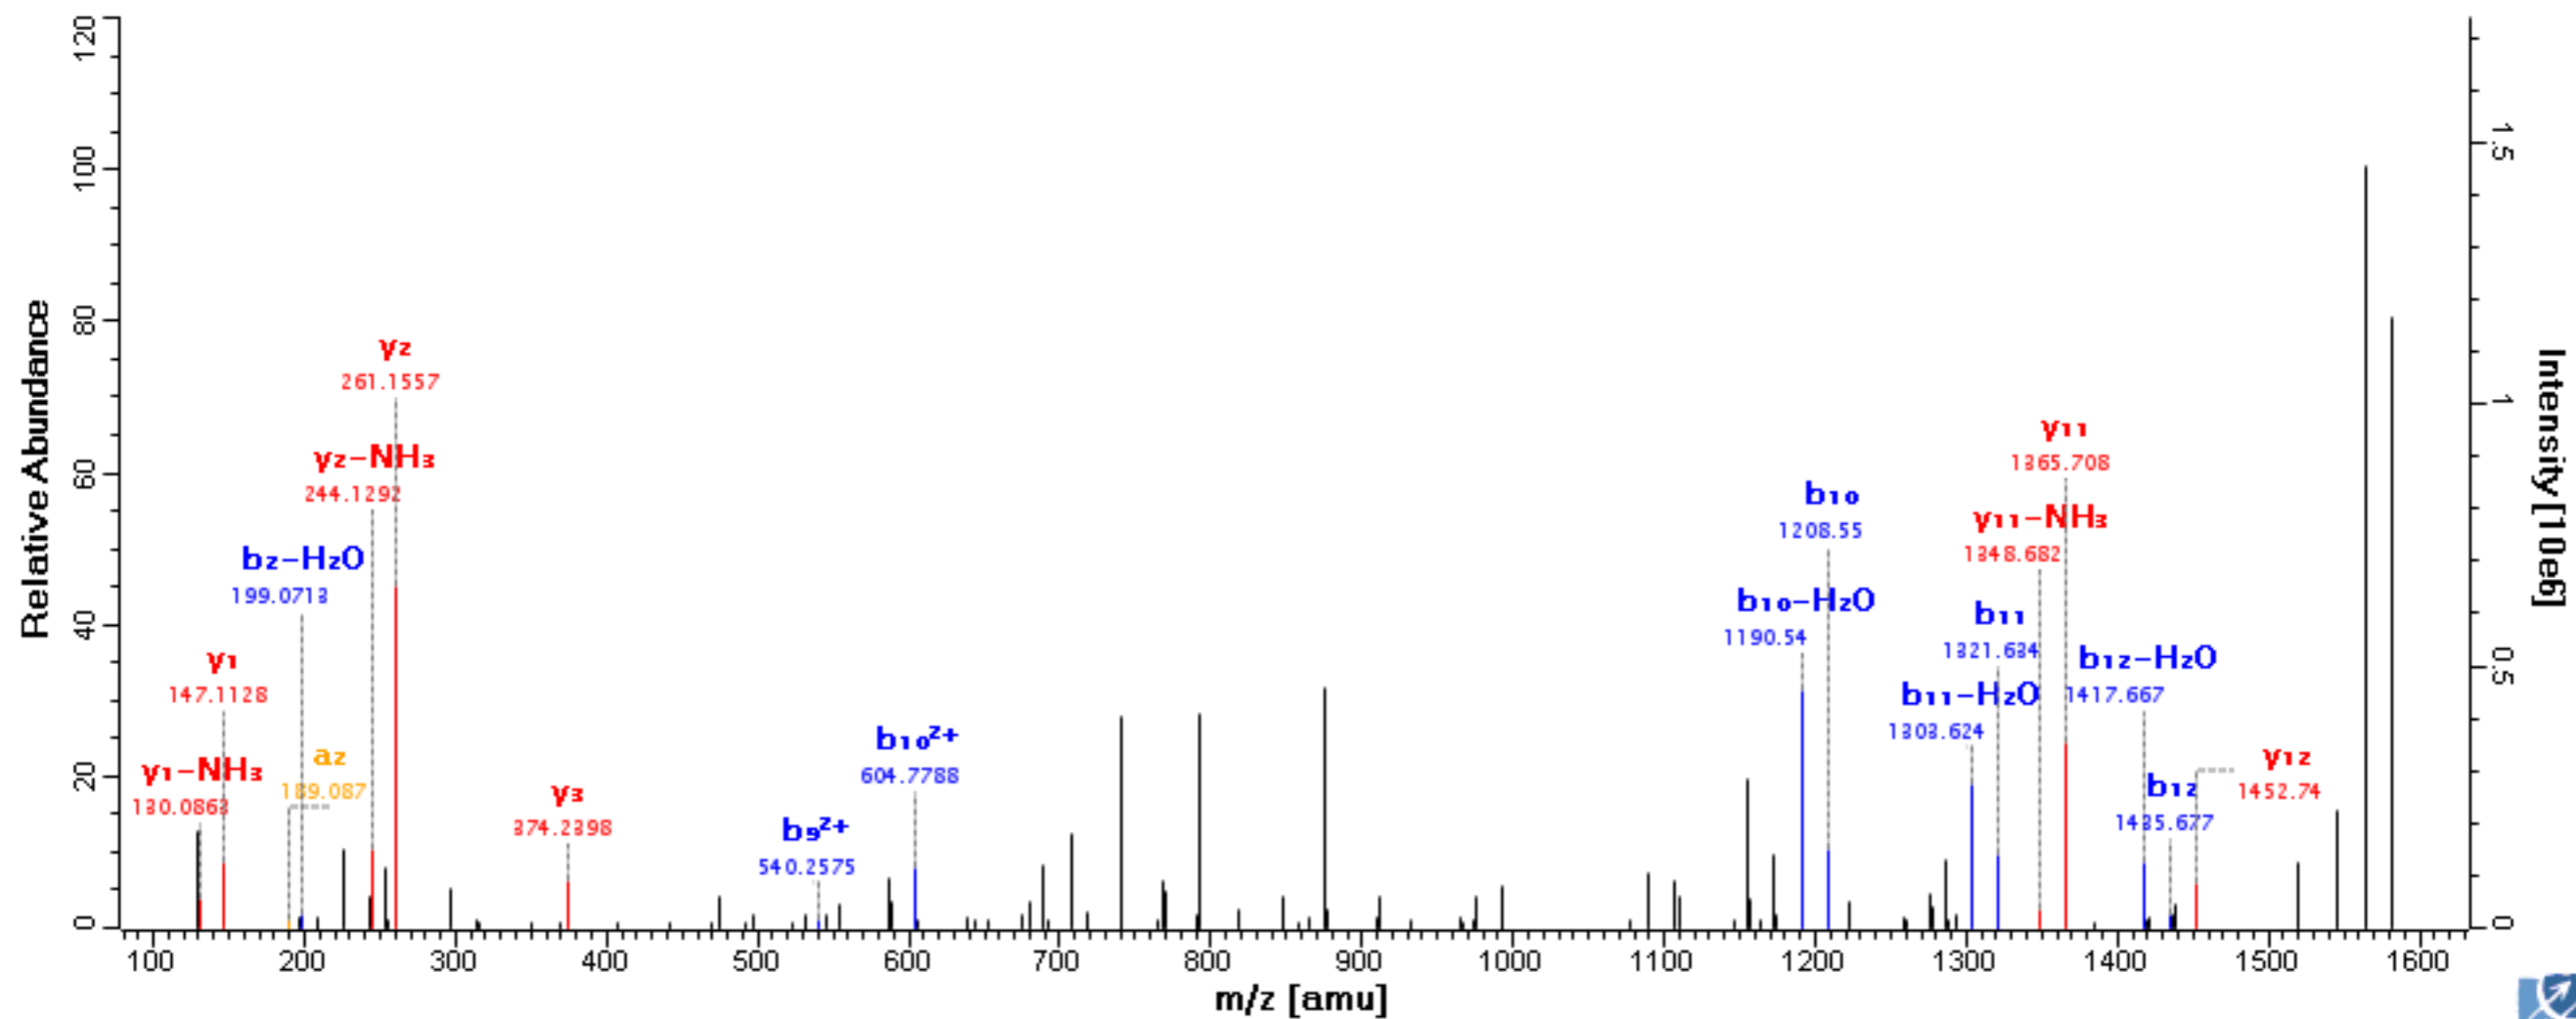

Source: Bibo\_20130531\_RM\_MSC07627\_1\_3  
 Scannumber: 17133  
 Protein: GNB2L1; HLC7; PIG21; D6REE5; P63244; E9KL35; D6R9L0; D6RAC2; D6R9Z1; D6RHH4; D6RDF4; B4DVD2; D6RFZ9; D6RF4; B4DWC6; D6RBD0; B4E0C3; E9PD14; D6RAU2; D6R909; D6RGK  
 Peptide Score: 90.15  
 Method: FTMS; HCD; 1

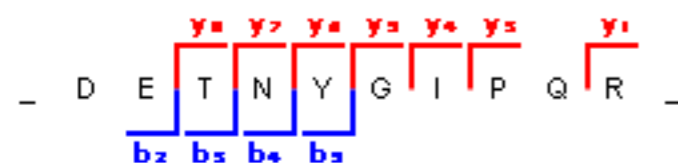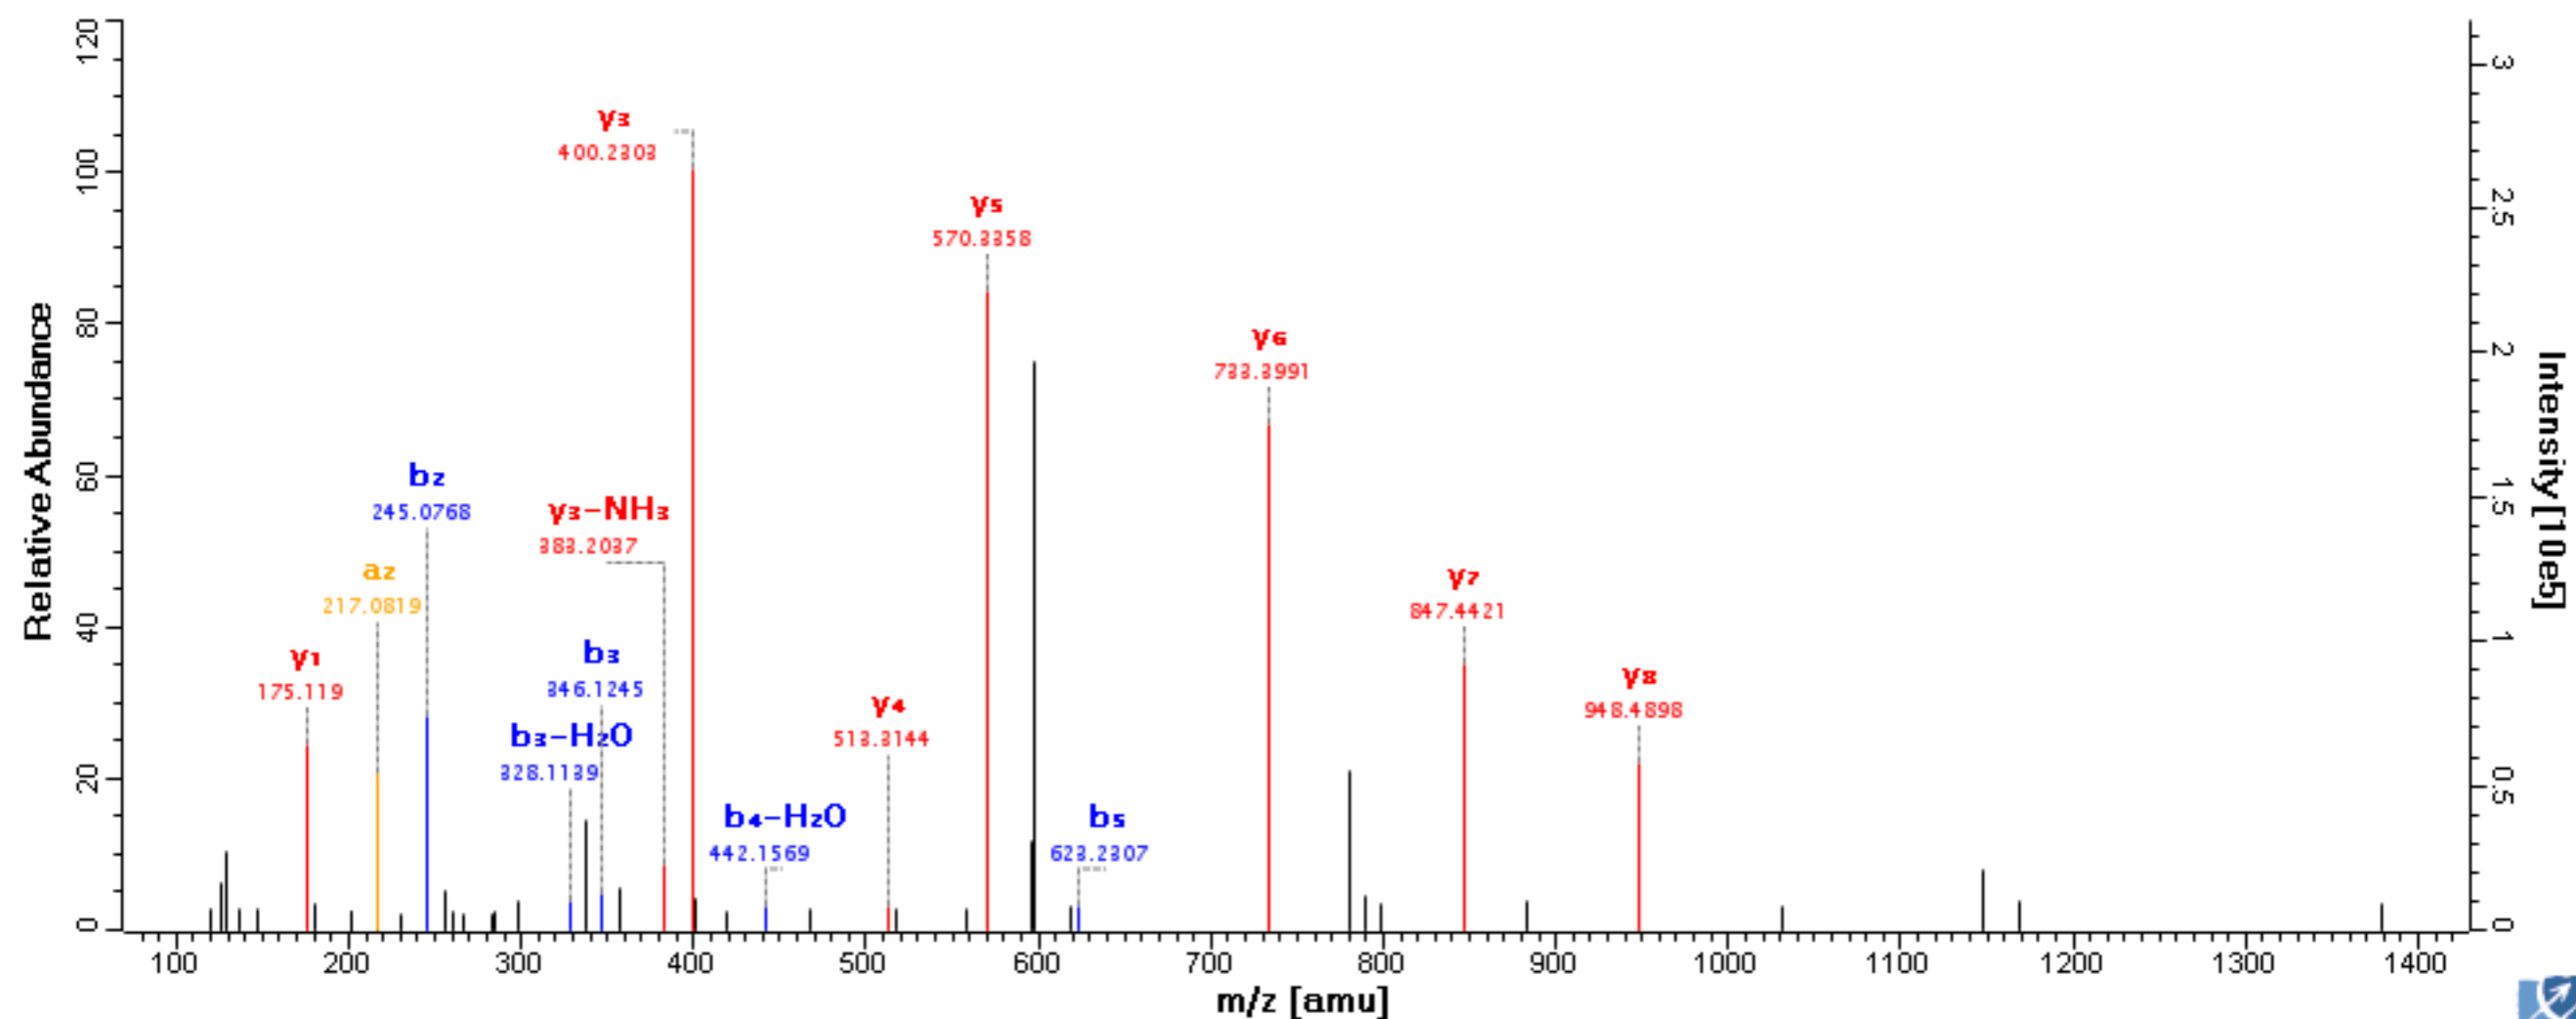

Source: Bibo\_20130531\_RM\_MSC07627\_1\_3  
 Scannumber: 19704  
 Protein: RP11-173B14.3-003; UCHL3; UCHL3; E9P8F1; Q5TBK7; P15374  
 Peptide Score: 66.26  
 Method: FTMS; HCD; 1

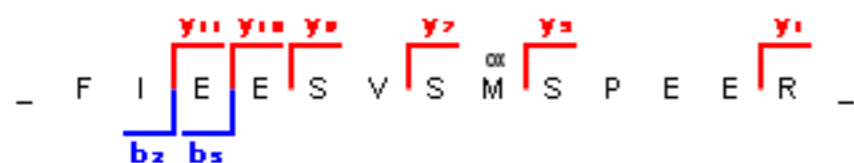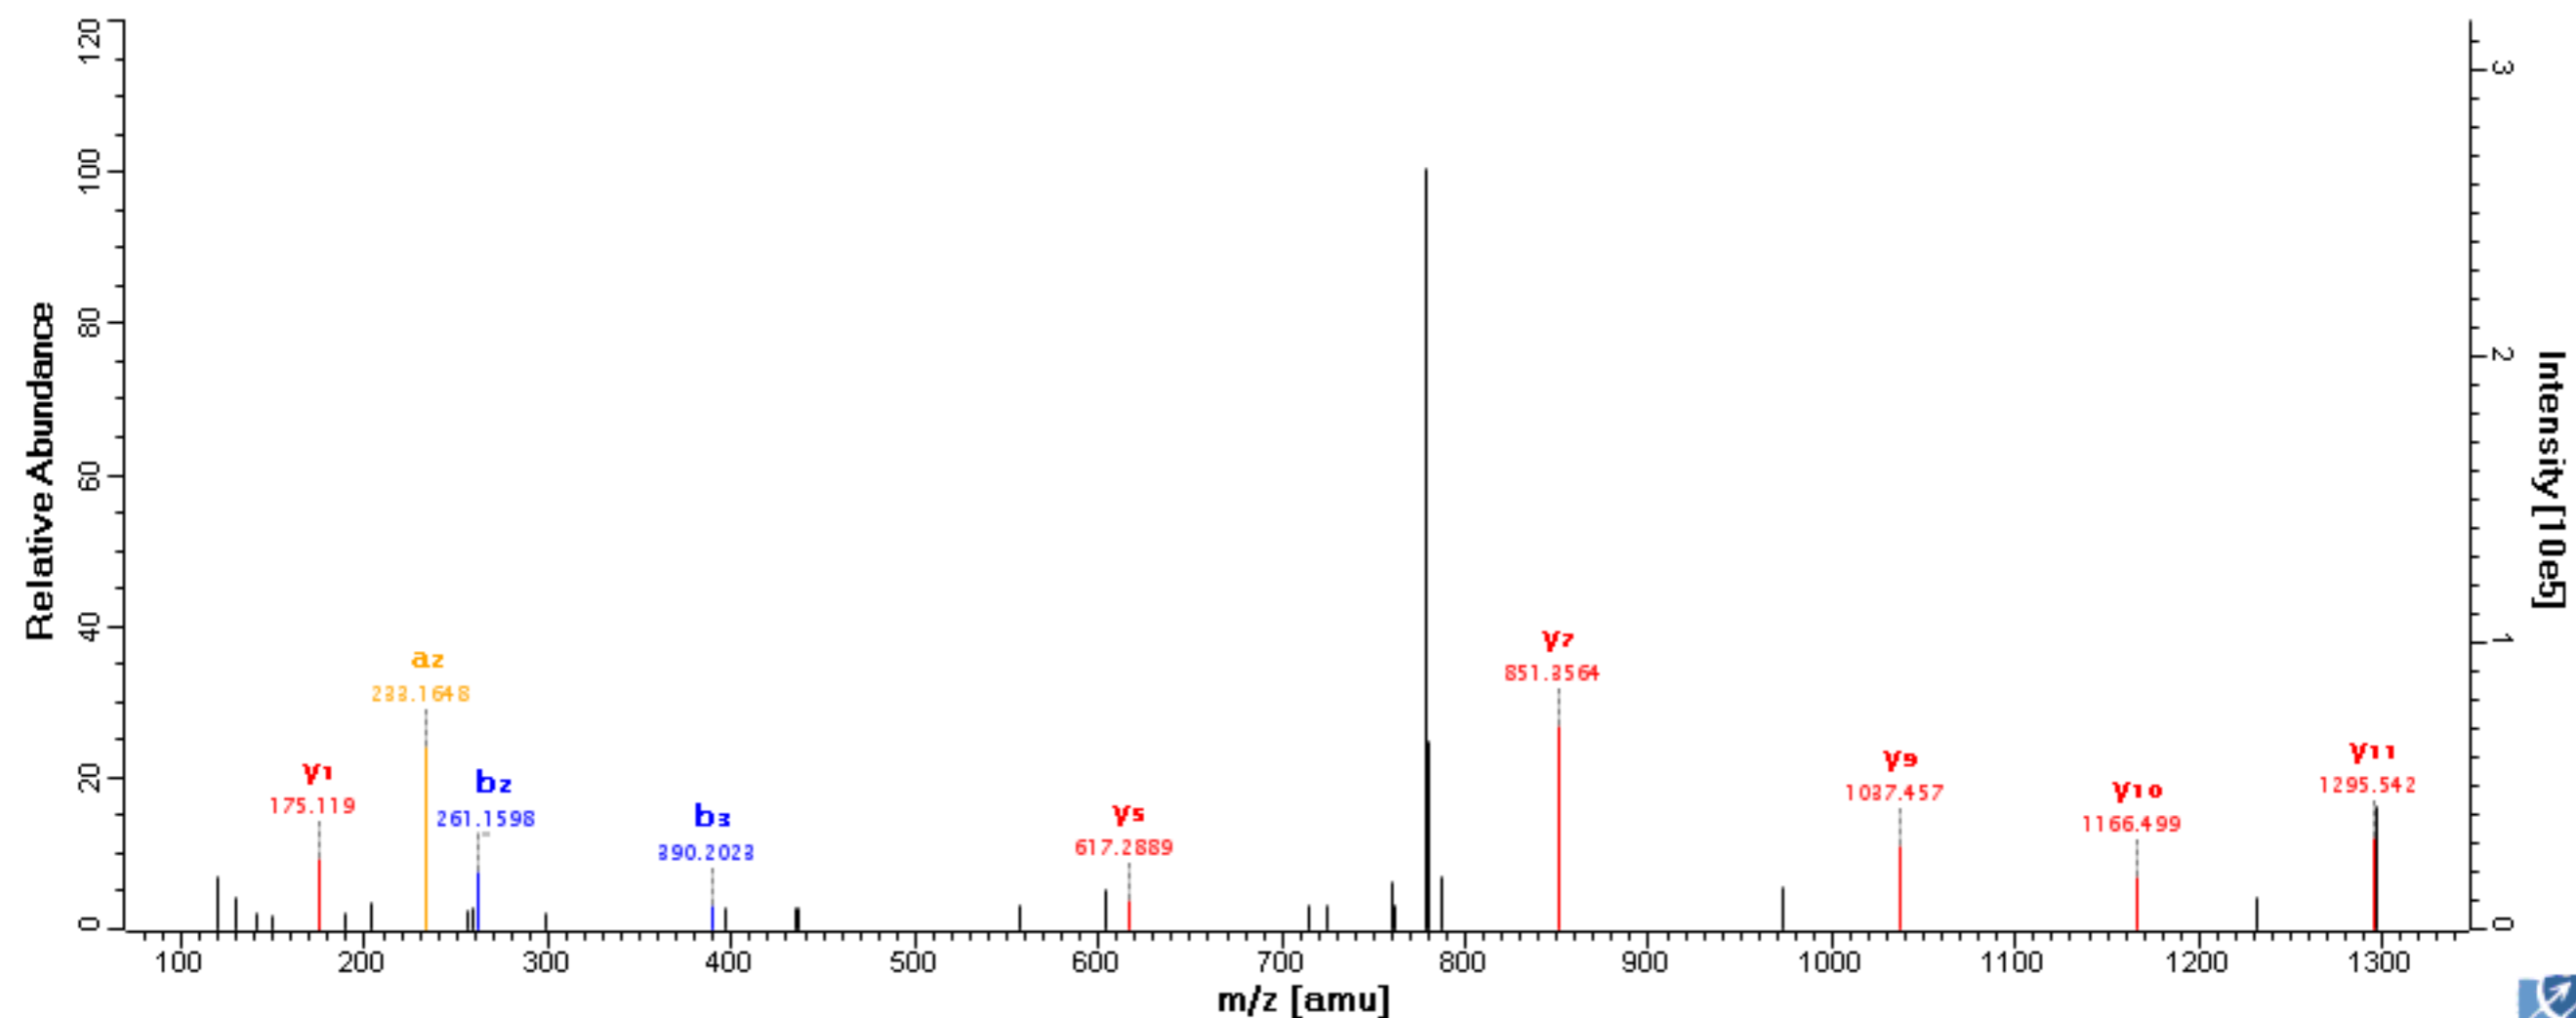

Source: Bibo\_20130531\_RM\_MSC07627\_1\_3  
 Scannumber: 19789  
 Protein: RP11-173B14.3-003; UCHL3; UCHL3; E9P8F1; Q5TBK7; P15374  
 Peptide Score: 74.76  
 Method: FTMS; HCD; 1

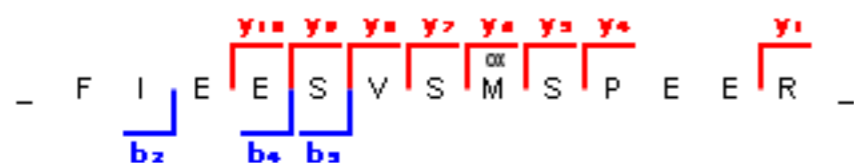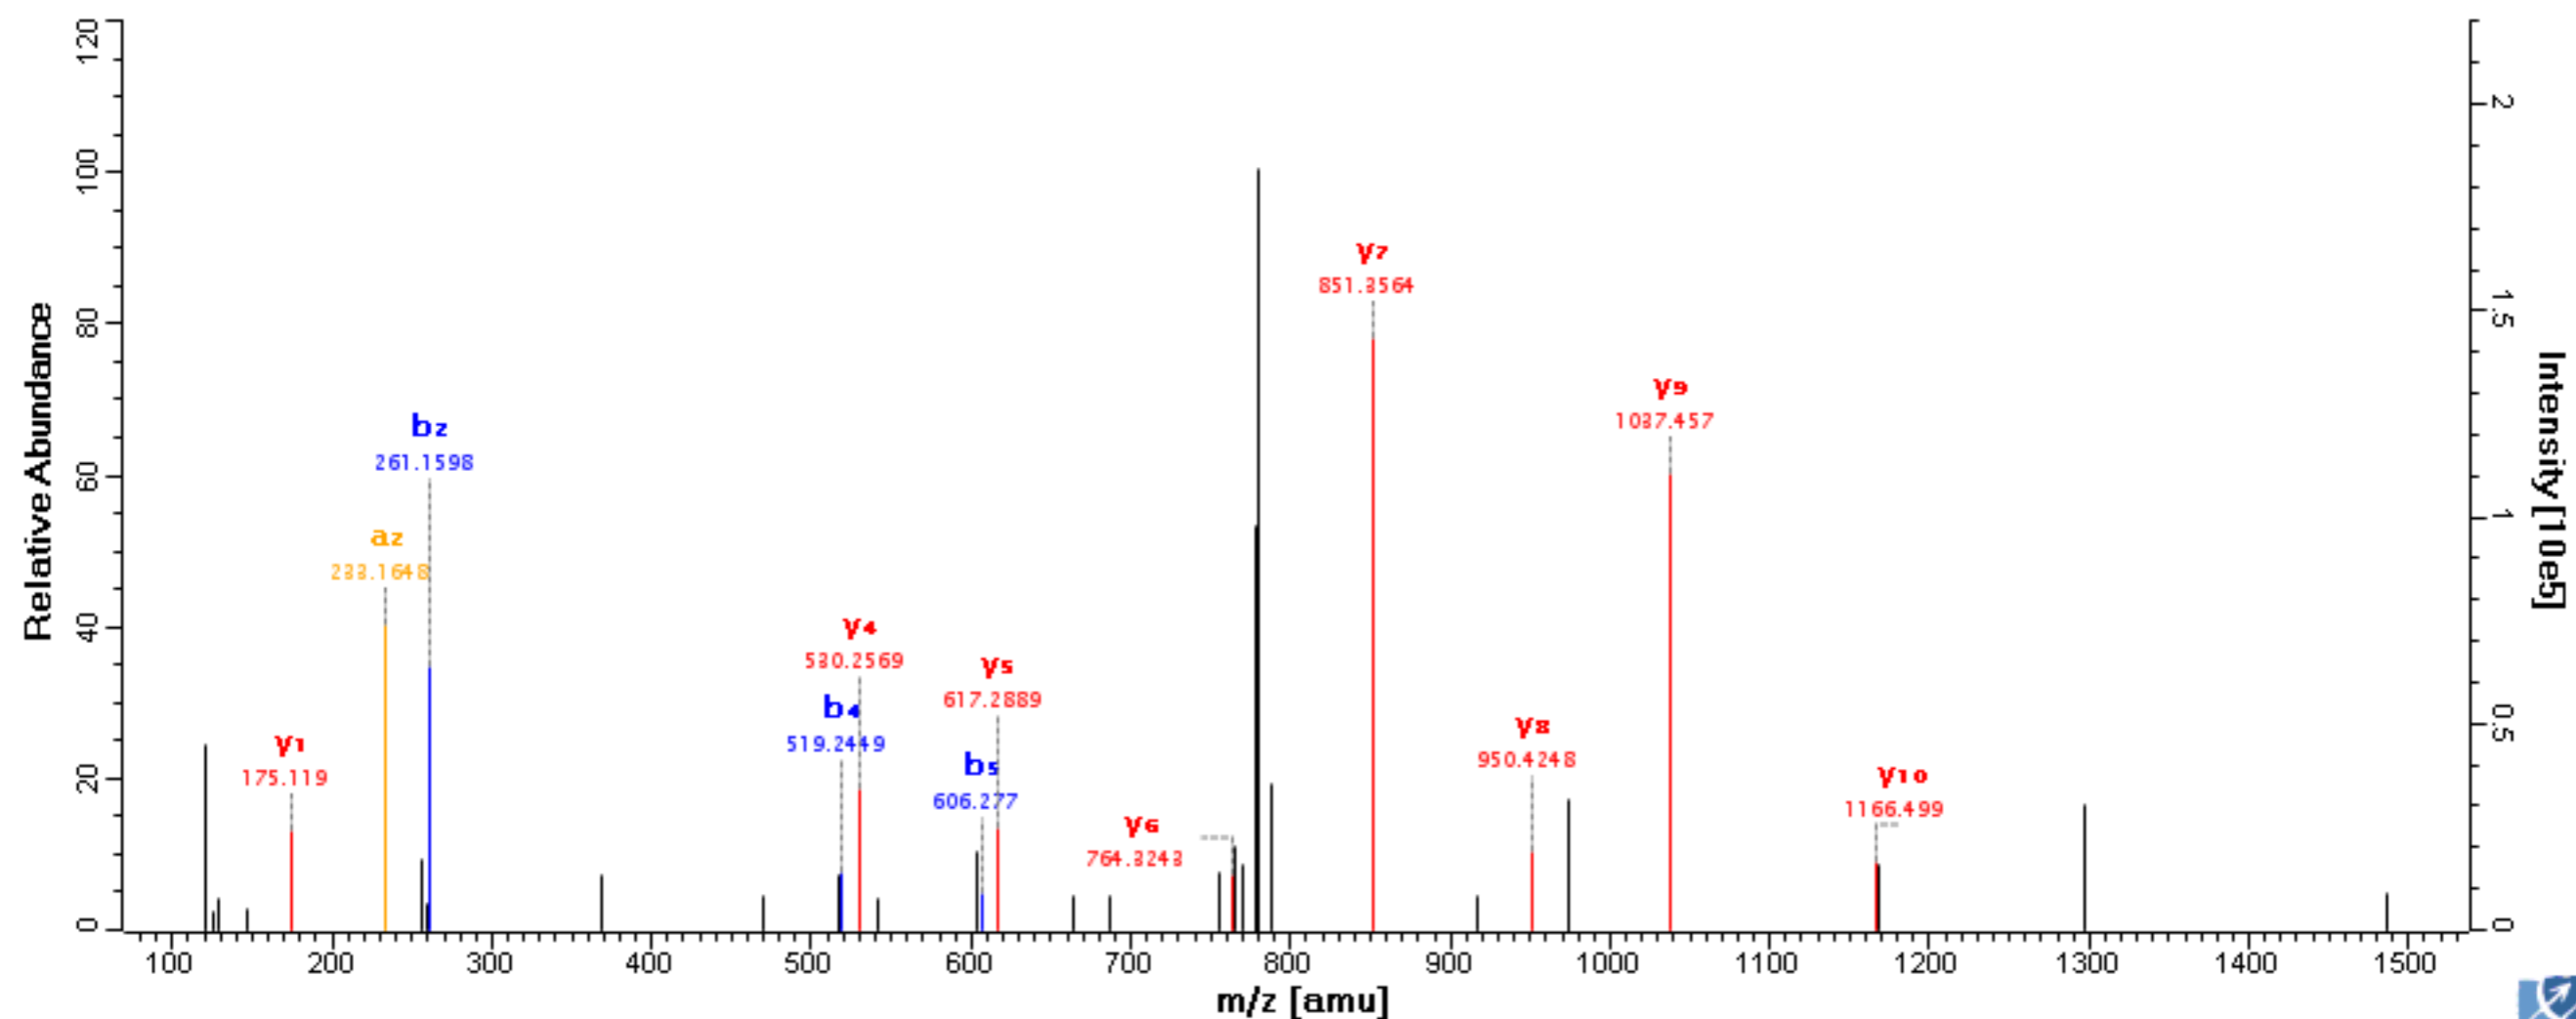

Source: Bibo\_20130531\_RM\_MSC07627\_1\_3

Scannumber: 19943

Protein: NAP1L1; NRP; NAP1L4; NAP1L4b; NAP1L4; NAP2; hCG\_2015037; NAP1L1; NAP1L4; NAP1L4; NAP1L4; P55209; A8CGI3; A8MZ22; B2R6J4; B4DS05; B7ZAC7; B7ZAK9; B7ZB83; B3KNT8; B7Z22

Peptide Score: 107.15

Method: FTMS; HCD; 1

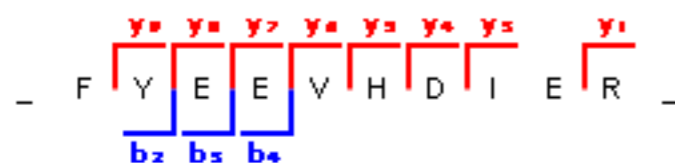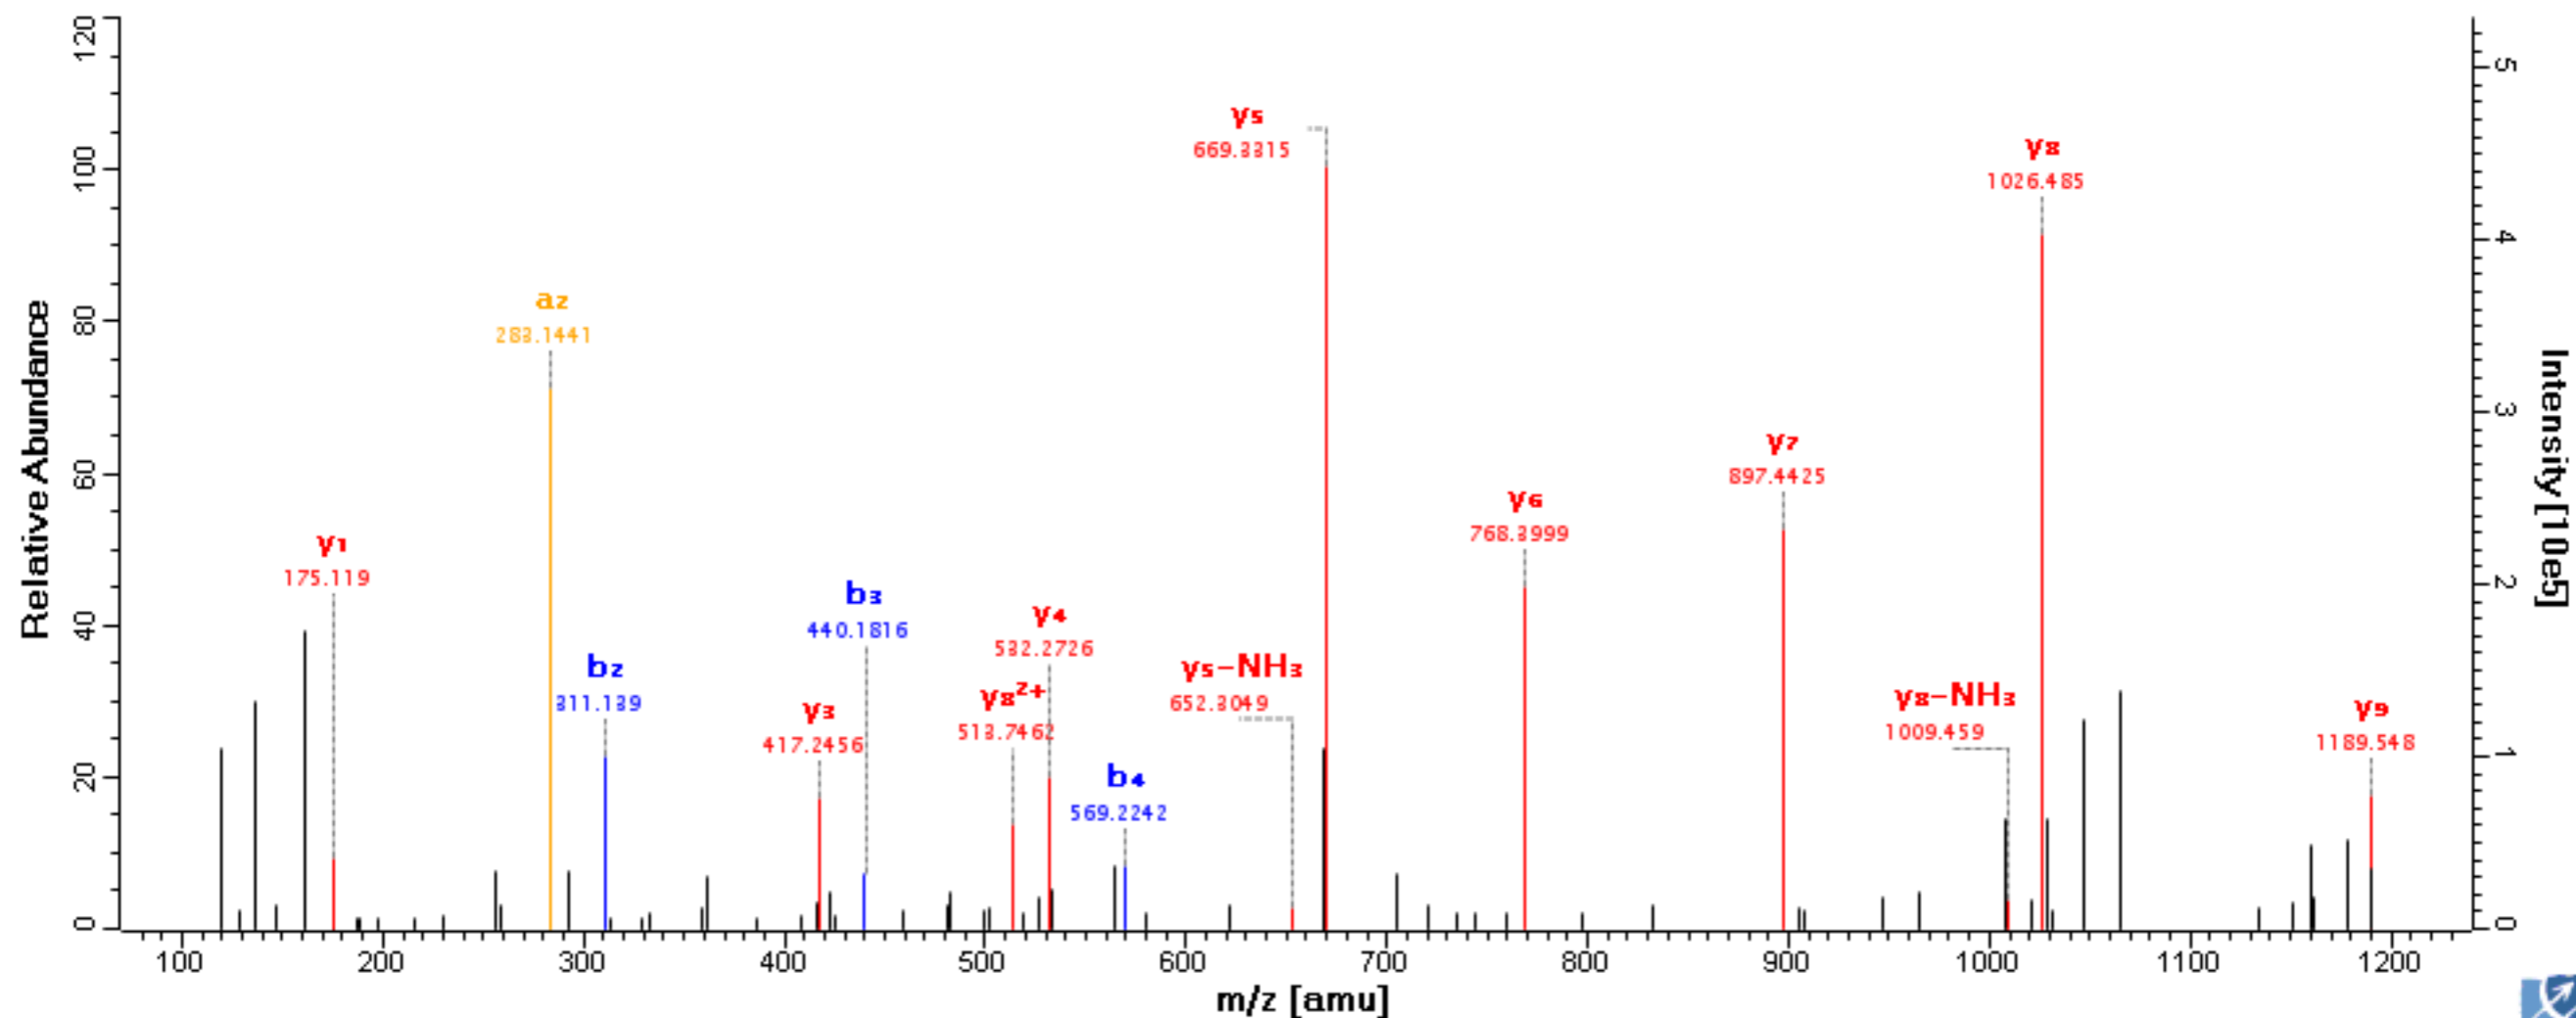

Source: Bibo\_20130531\_RM\_MSC07627\_1\_3  
 Scannumber: 21089  
 Protein: EPN2; KIAA1065; EPN2; KIAA1065; hCG\_1811979; EPN2; KIAA1065; EPN2; O95208-1; O95208; B3KMB3; O95208-2; O95208; B7ZKM5; E9PBC2; Q52LD0; O95208-3; O95208; E7EMC3; B7  
 Peptide Score: 82.1  
 Method: FTMS; HCD; 1

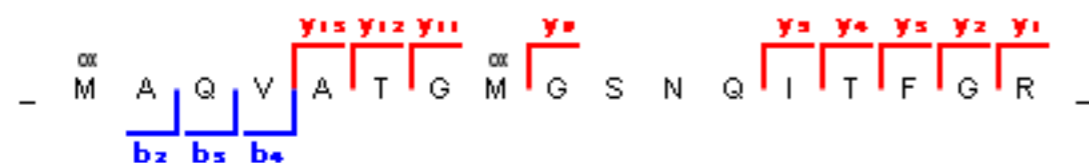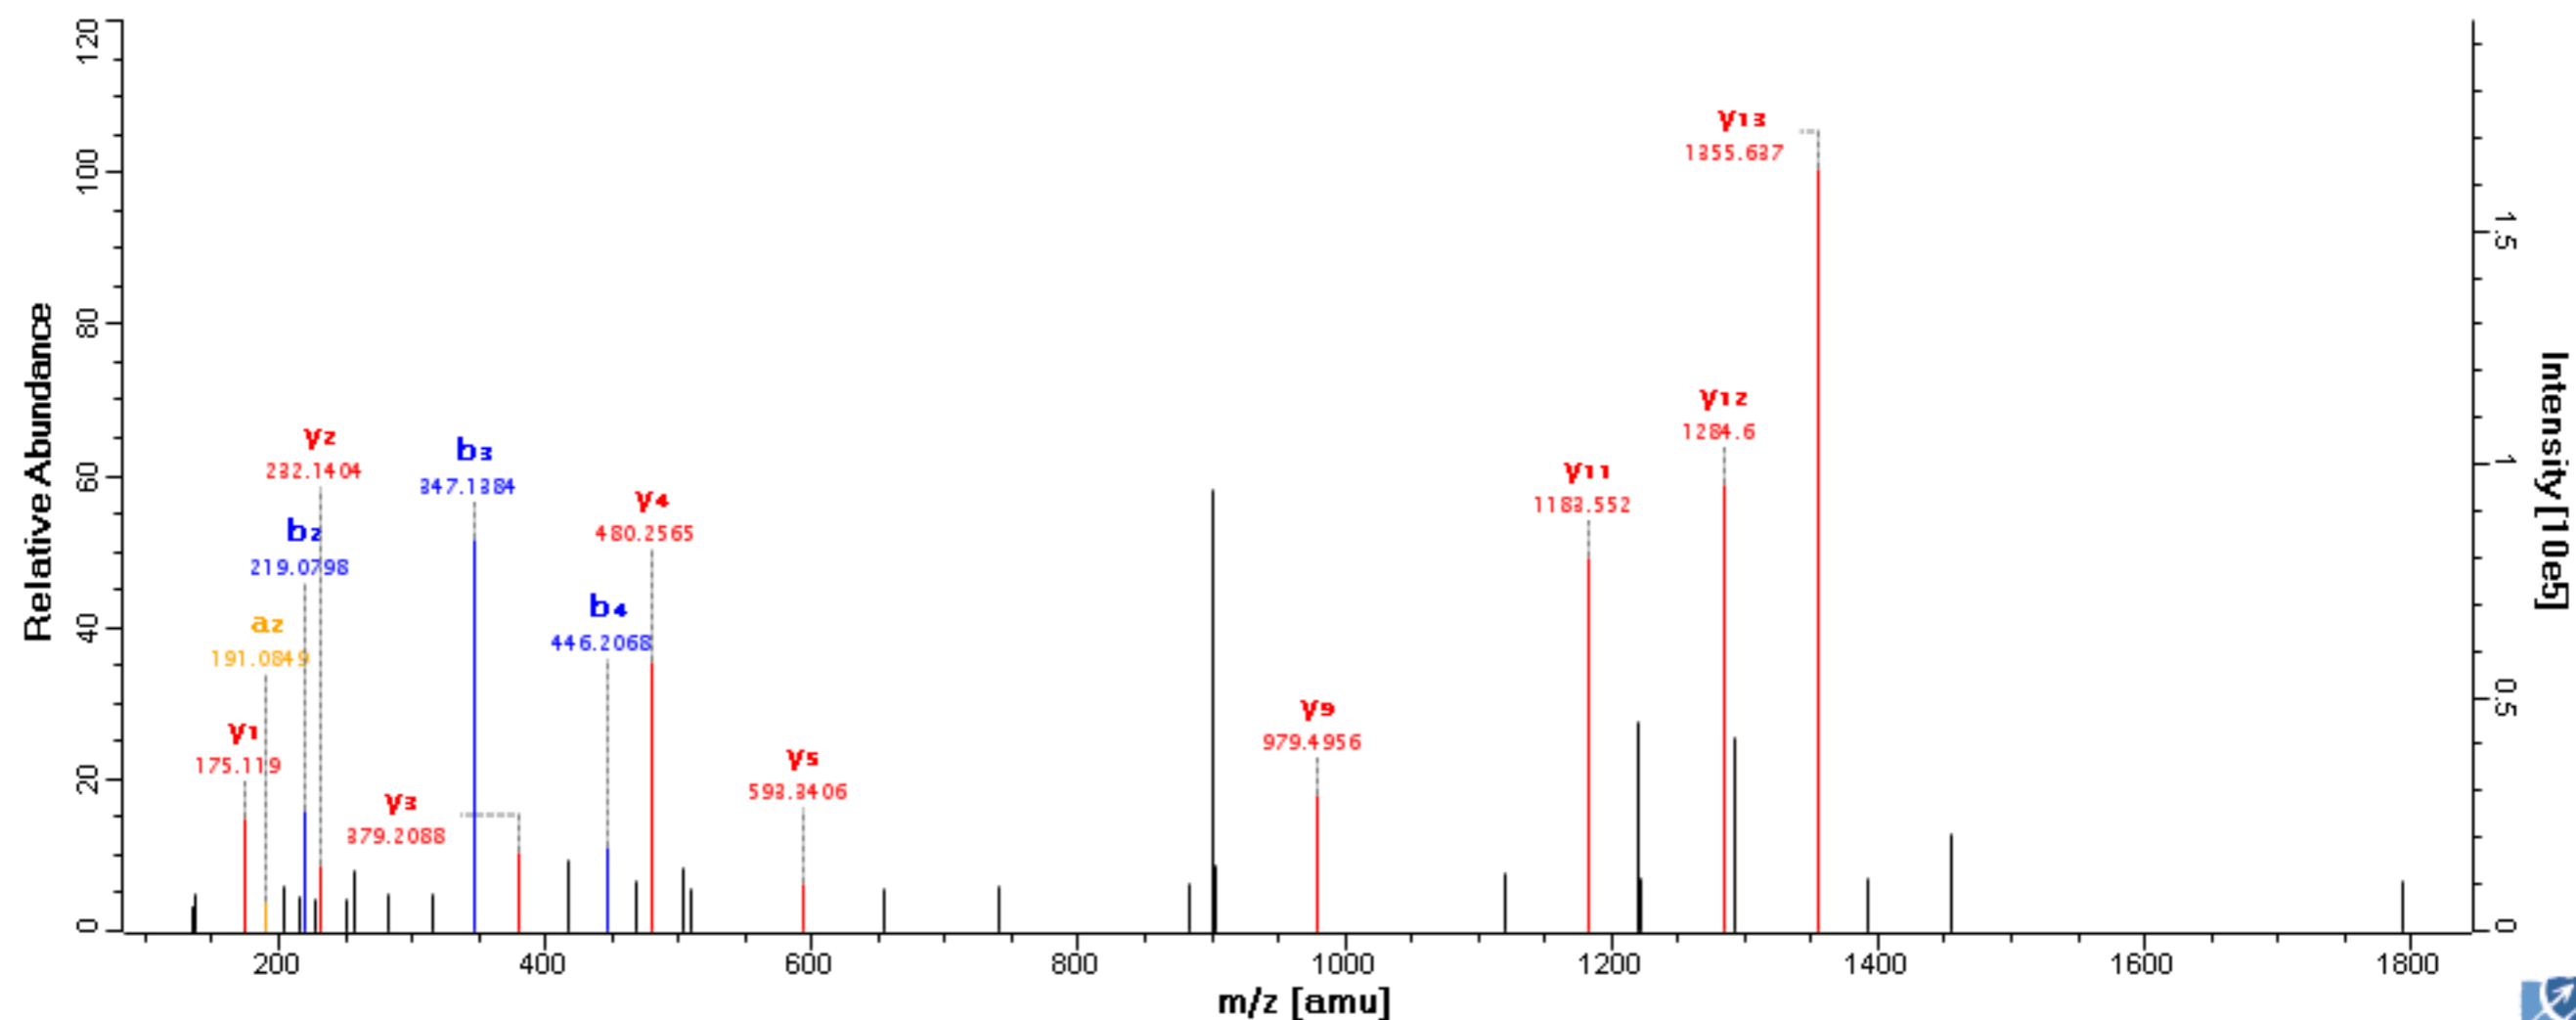

Source: Bibo\_20130531\_RM\_MSC07627\_1\_3  
 Scannumber: 21761  
 Protein: DRIP4; PDCD6IP; AIP1; ALIX; KIAA1375; PDCD6IP; B4DHD2; B7Z5C1; E9PFU1; Q4W4Y1; Q6NUS1; Q8WUM4  
 Peptide Score: 132.76  
 Method: FTMS; HCD; 1

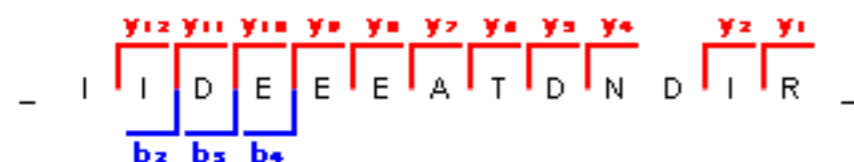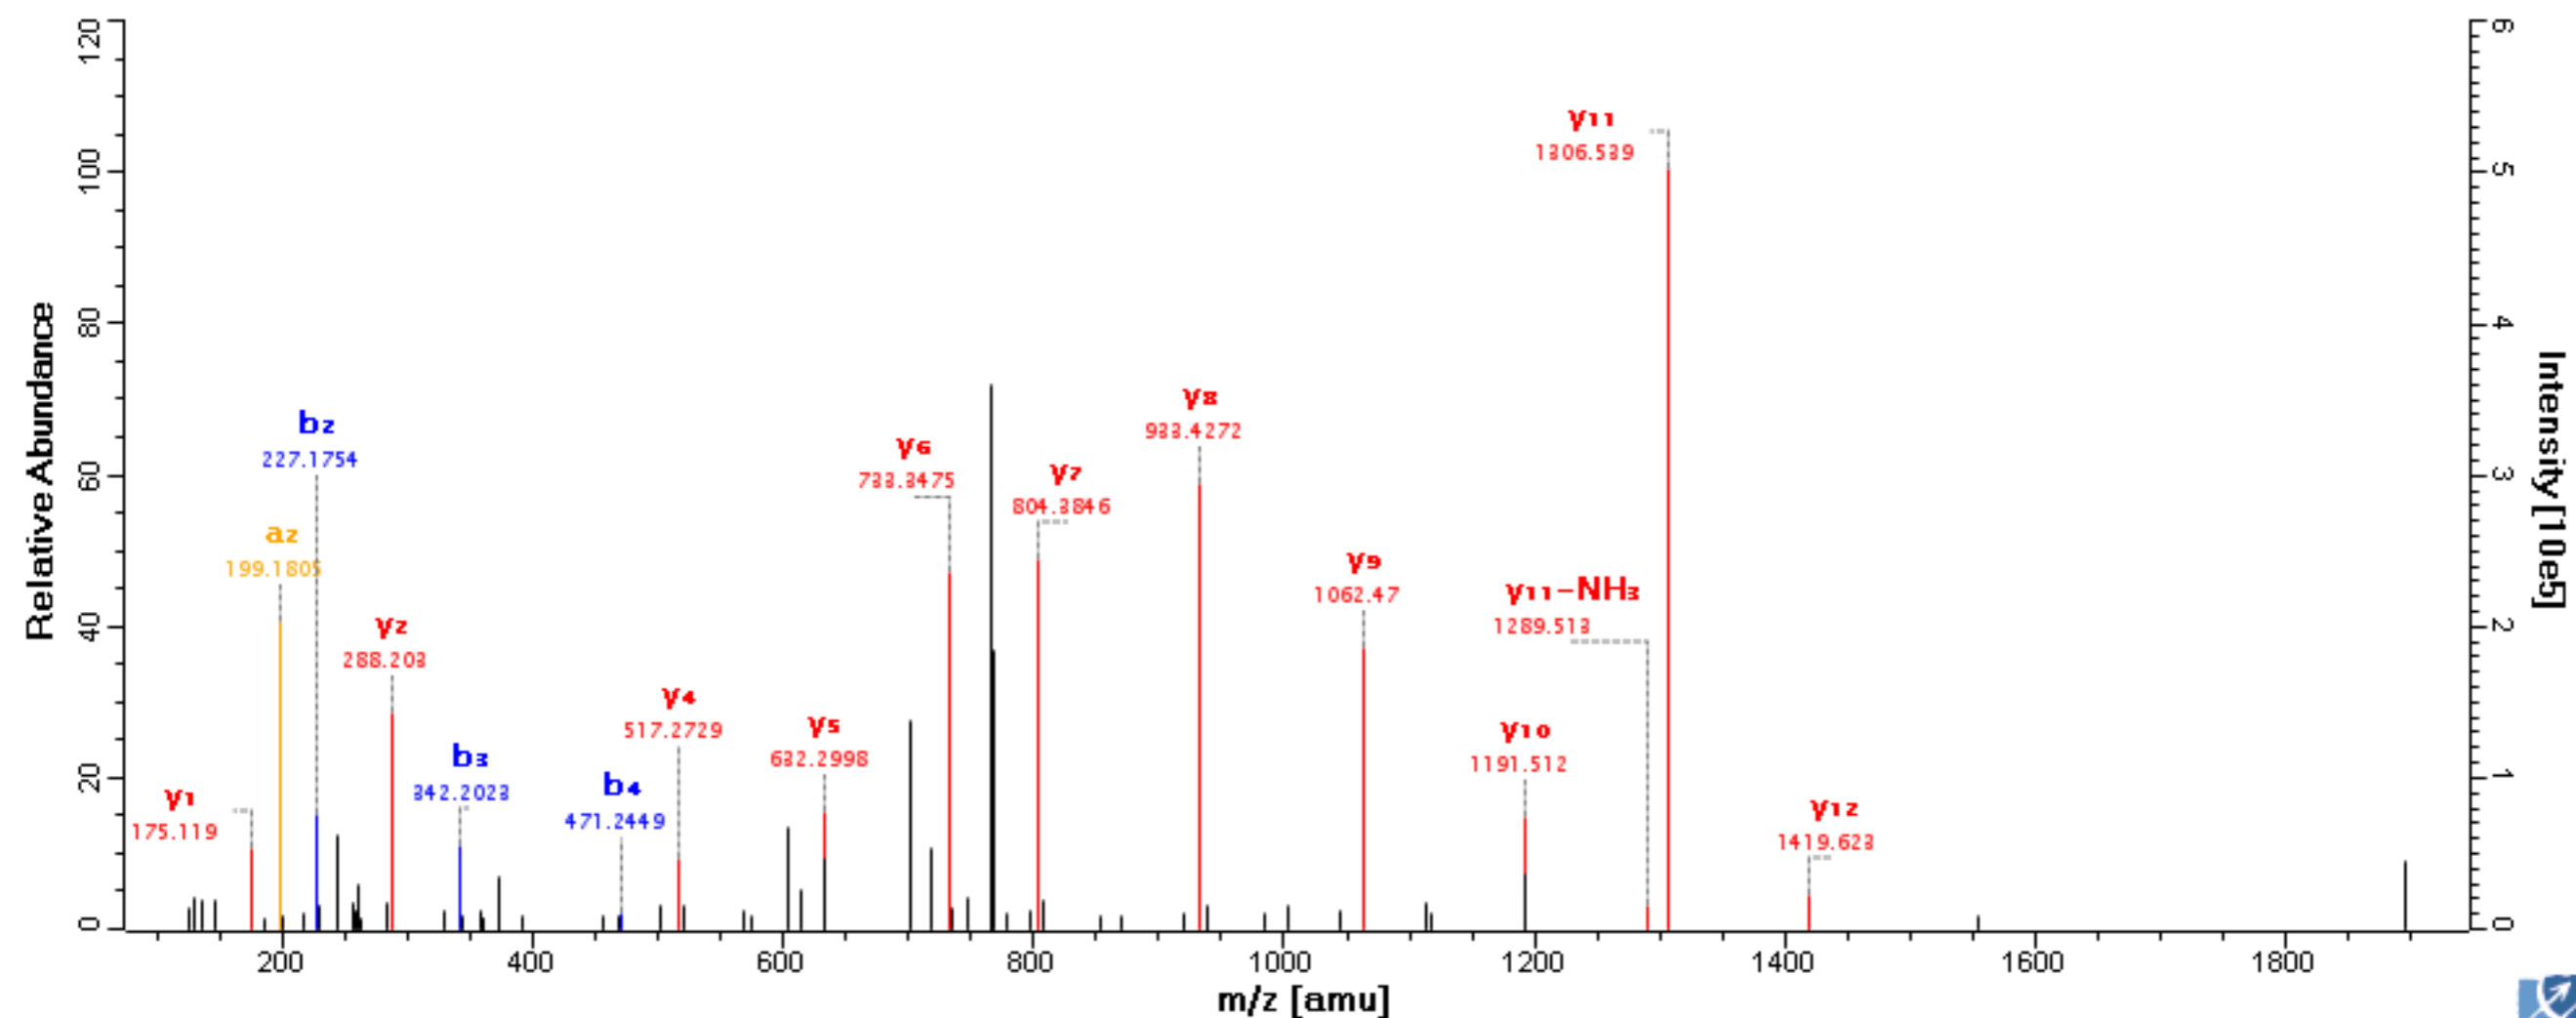

Source: Bibo\_20130531\_RM\_MSC07627\_1\_3

Scannumber: 24344

Protein: KIAA0886; MyO43; NOGO; RTN4; SP1507; Nbla10545; KIAA0886; MyO43; NOGO; RTN4; SP1507; KIAA0886; MyO43; NOGO; RTN4; SP1507; hCG\_1784307; RTN4; Q9NQC3-1; Q9NQC3; B4

Peptide Score: 97.73

Method: FTMS; HCD; 1

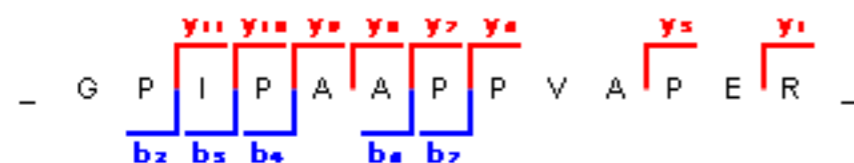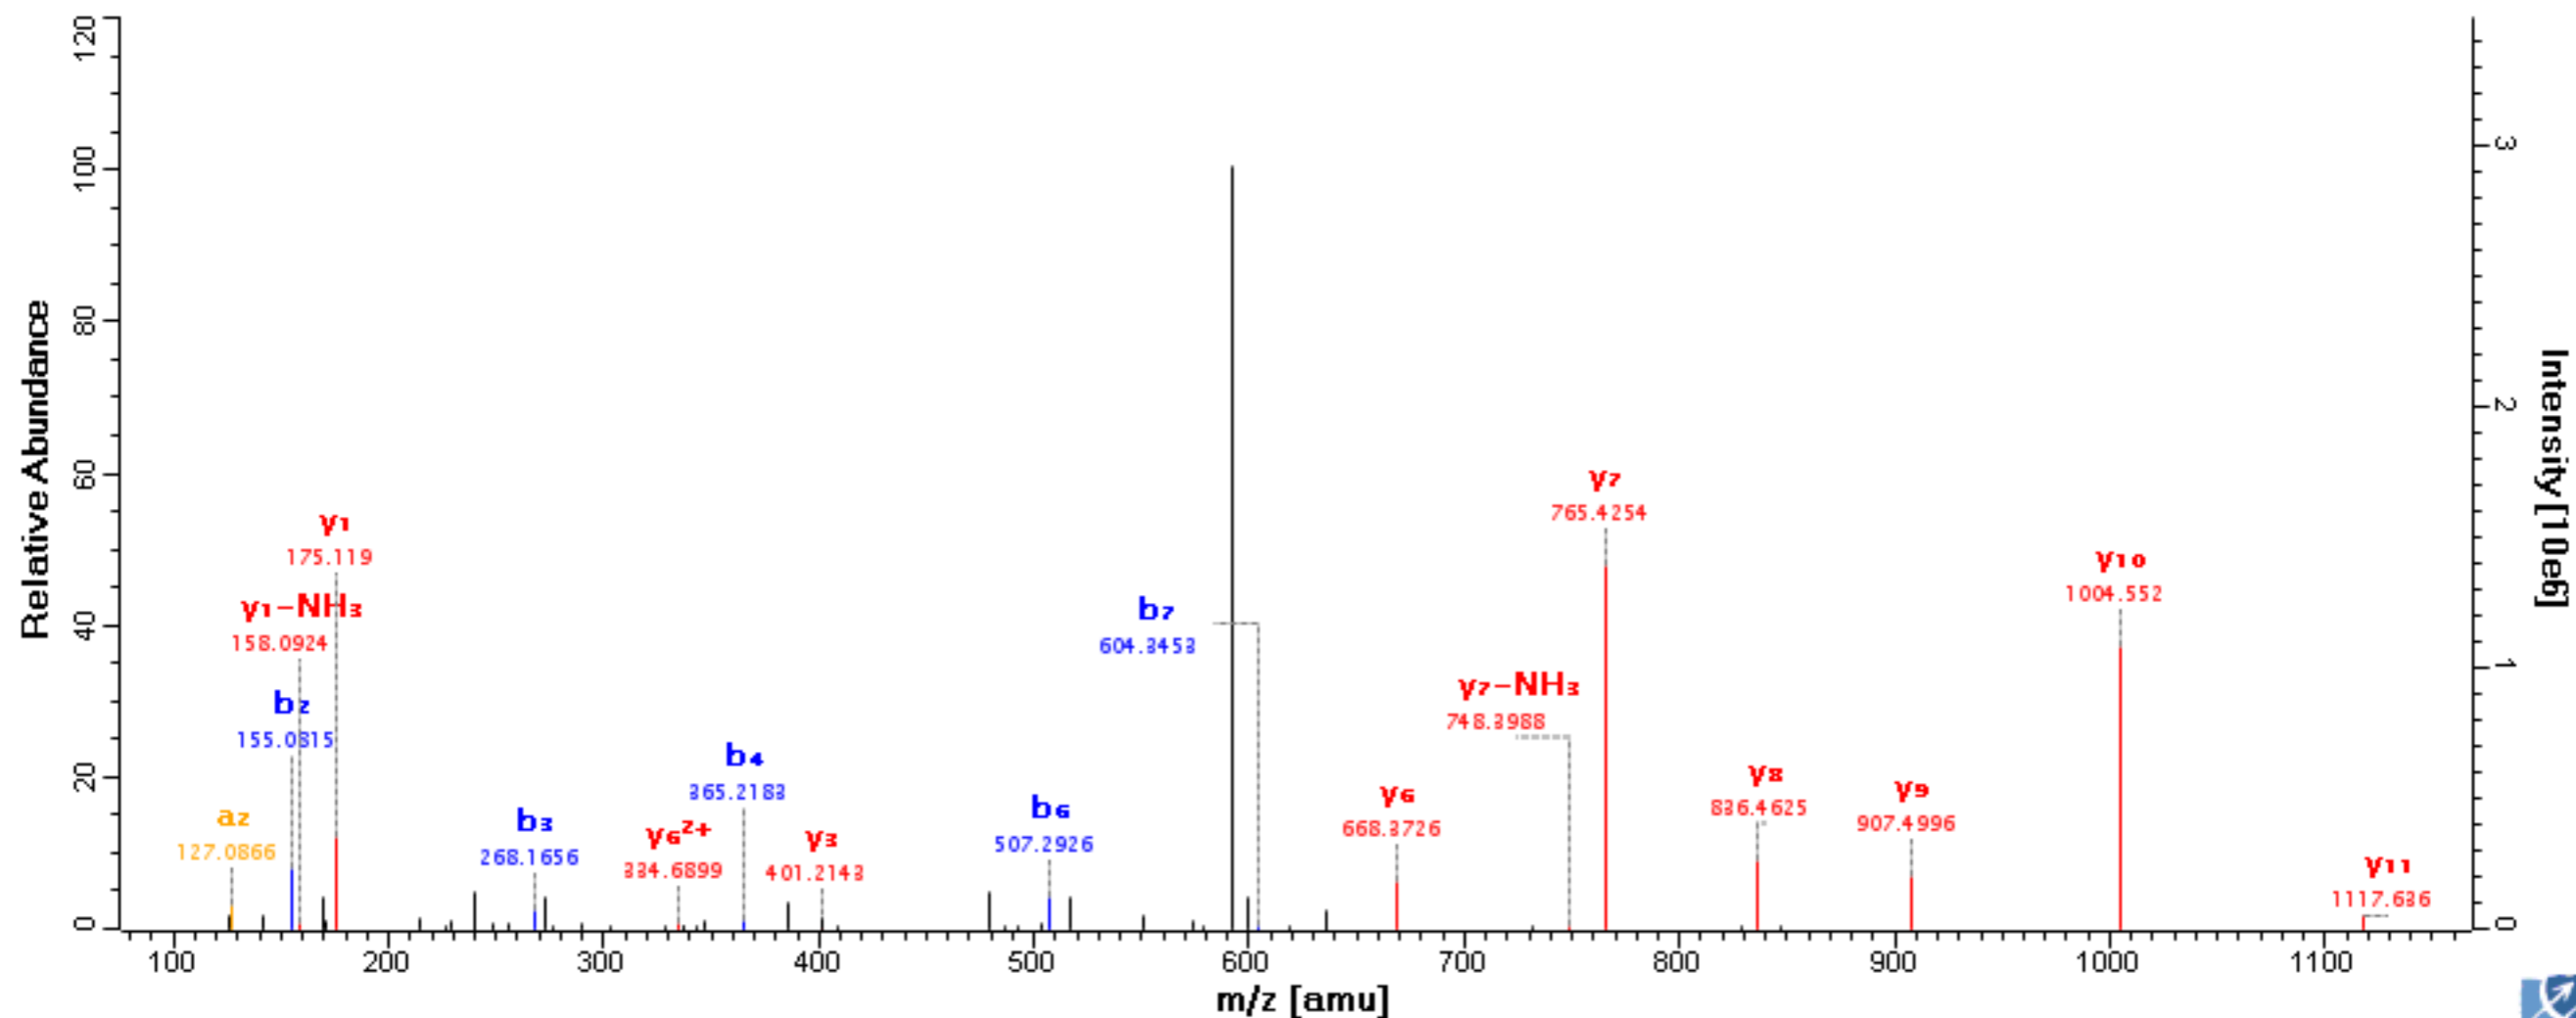

Source: Bibo\_20130531\_RM\_MSC07627\_1\_3  
 Scannumber: 25035  
 Protein: ARI; ARIH1; HUSSY-27; MOP6; UBCH7BP; Q9Y4X5  
 Peptide Score: 89.96  
 Method: FTMS; HCD; 1

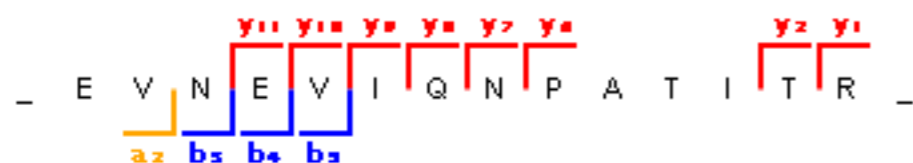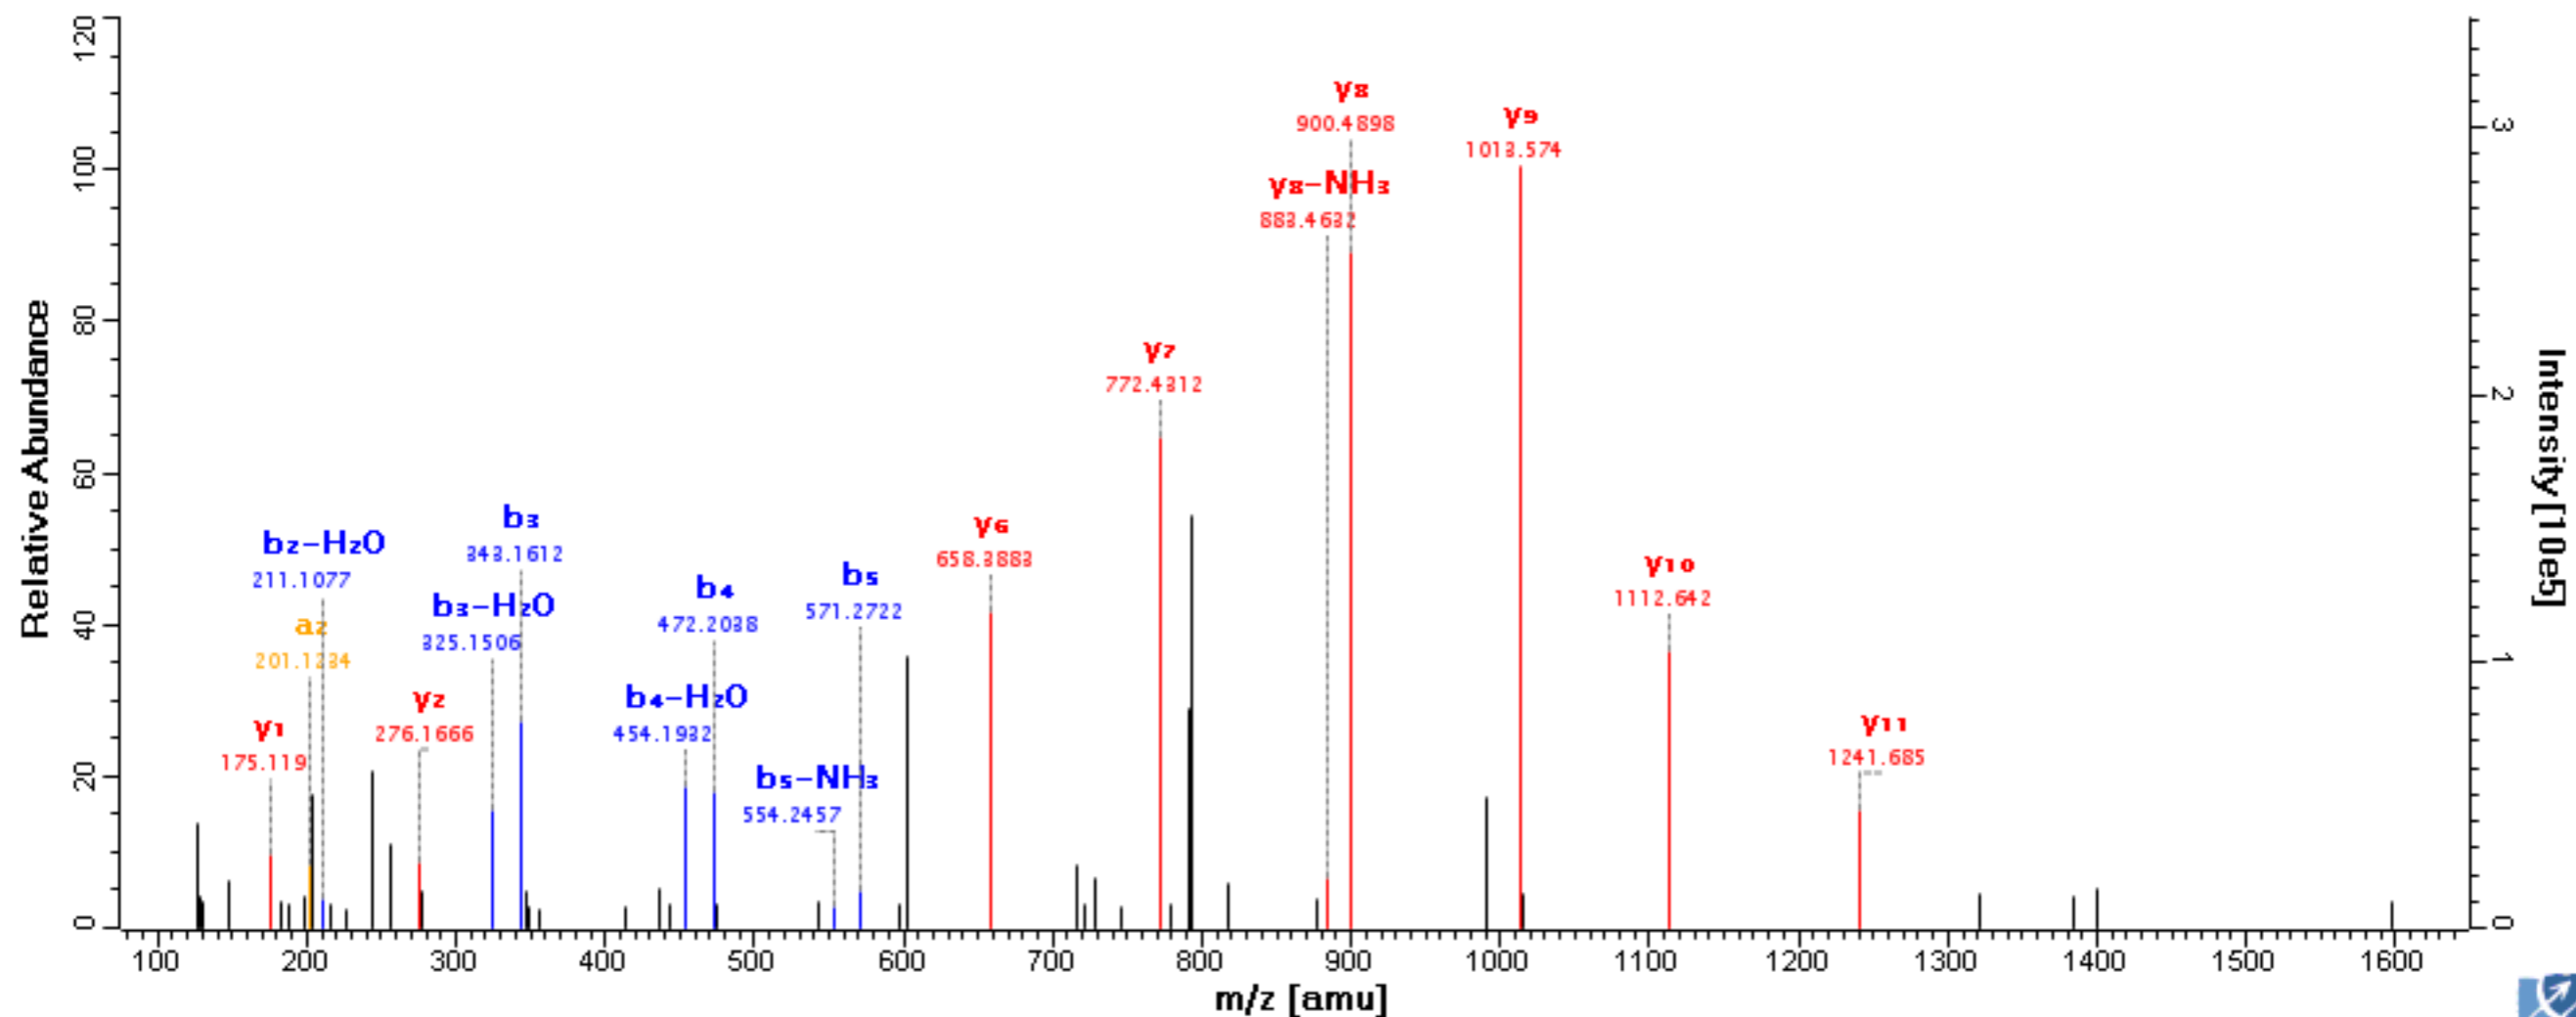

Source: Bibo\_20130531\_RM\_MSC07627\_1\_3  
 Scannumber: 26573  
 Protein: MCAM; MUC18; P43121-1; P43121; A8K6A6; B2R642; B3KXZ9  
 Peptide Score: 122.45  
 Method: FTMS; HCD; 1

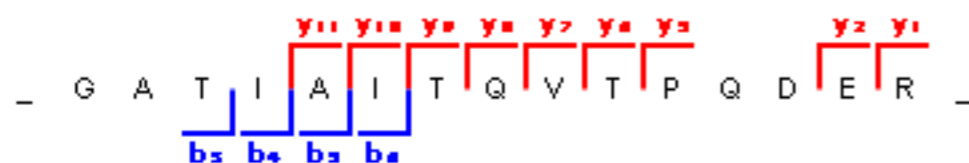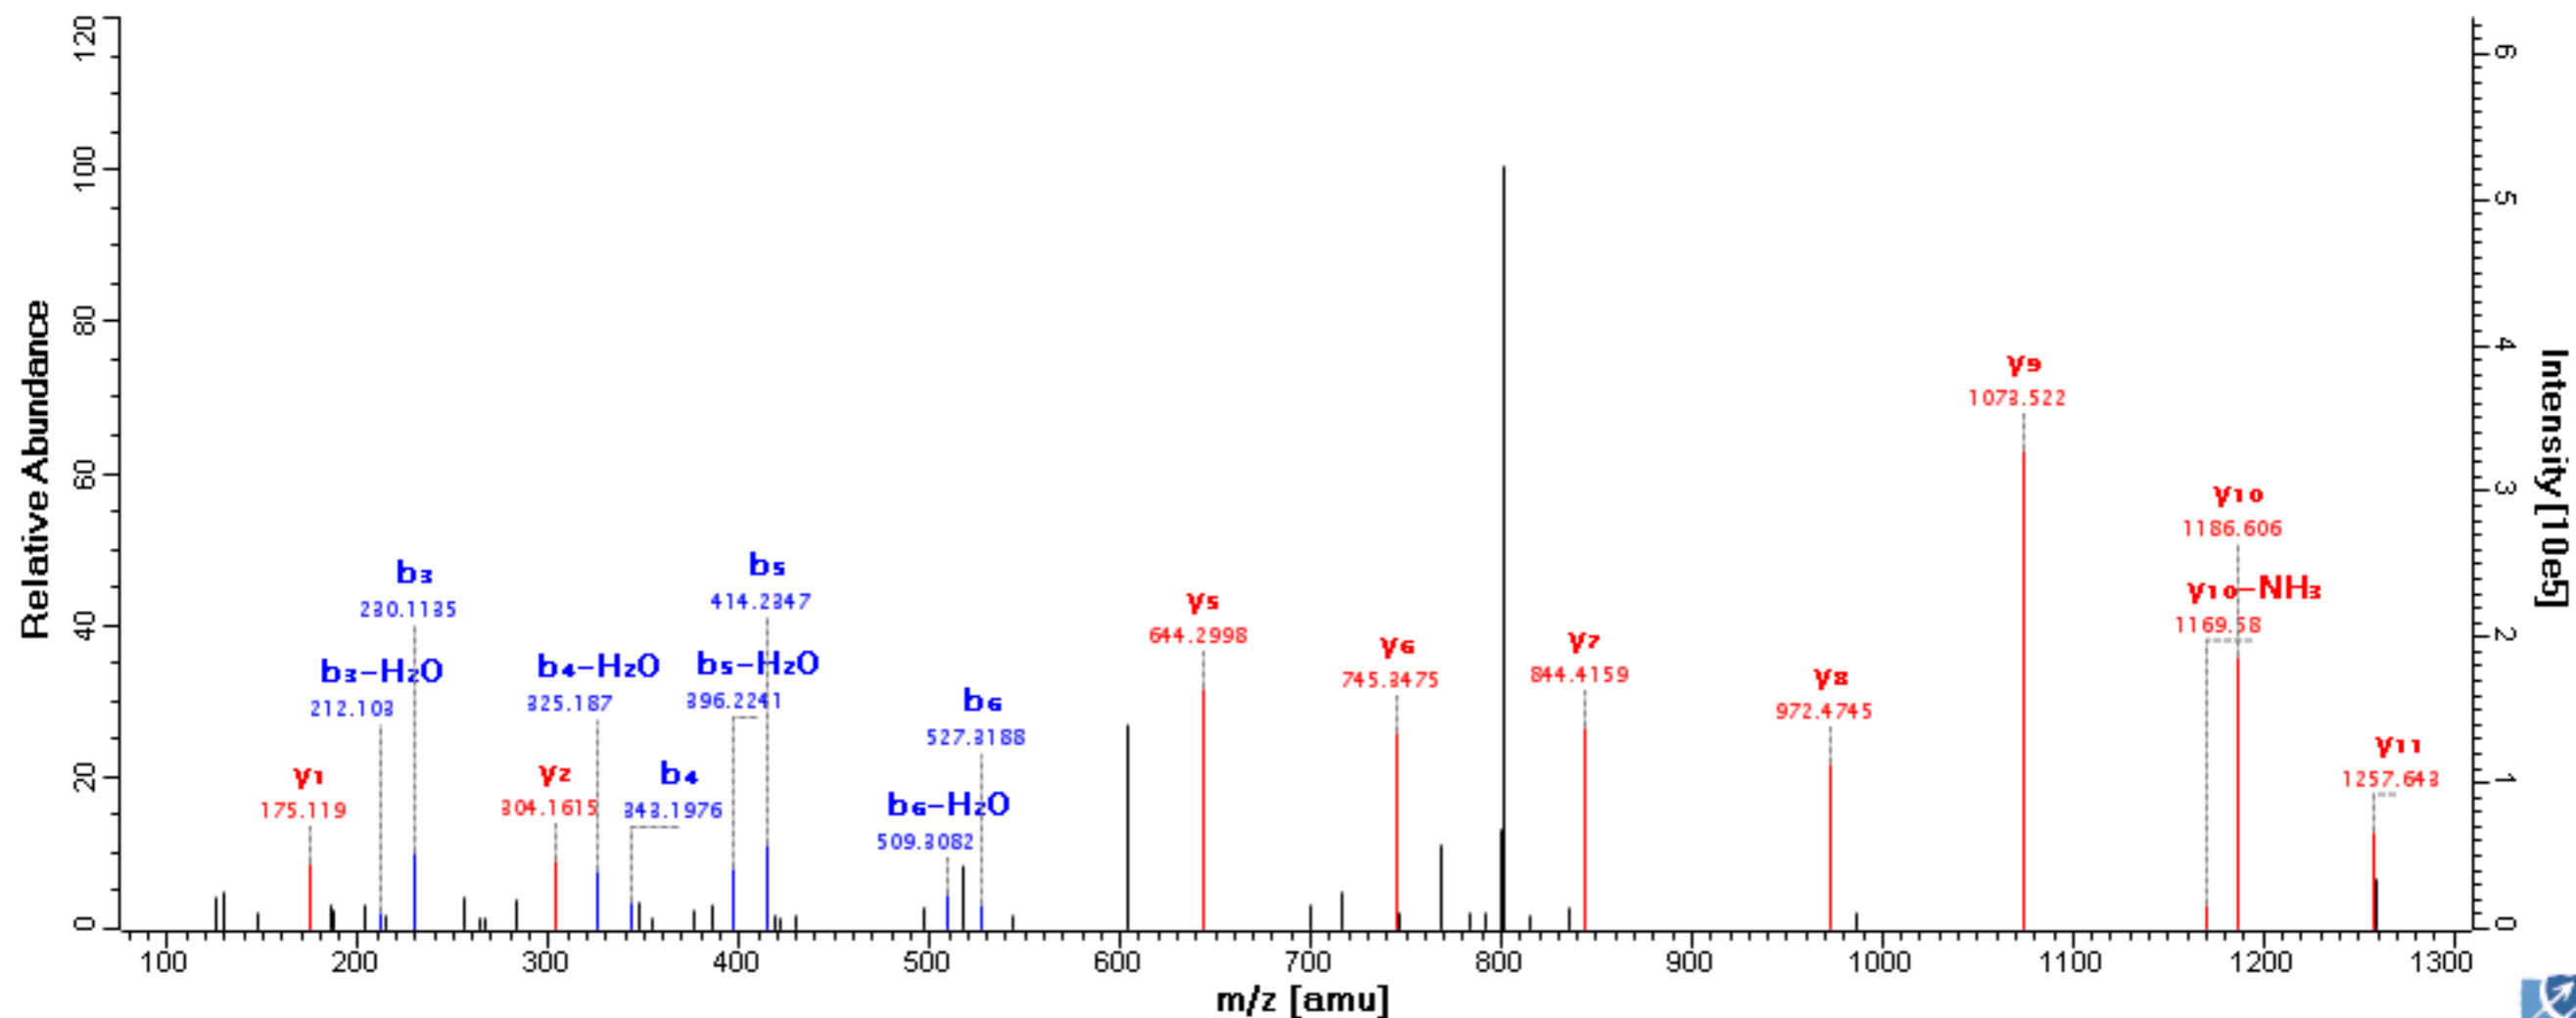

Source: Bibo\_20130531\_RM\_MSC07627\_1\_3  
 Scannumber: 27205  
 Protein: P02663  
 Peptide Score: 112.36  
 Method: FTMS; HCD; 1

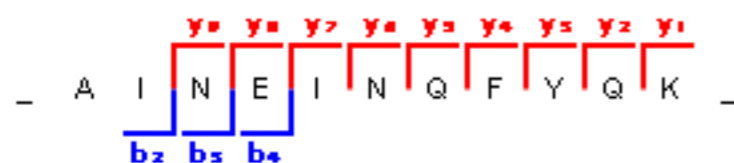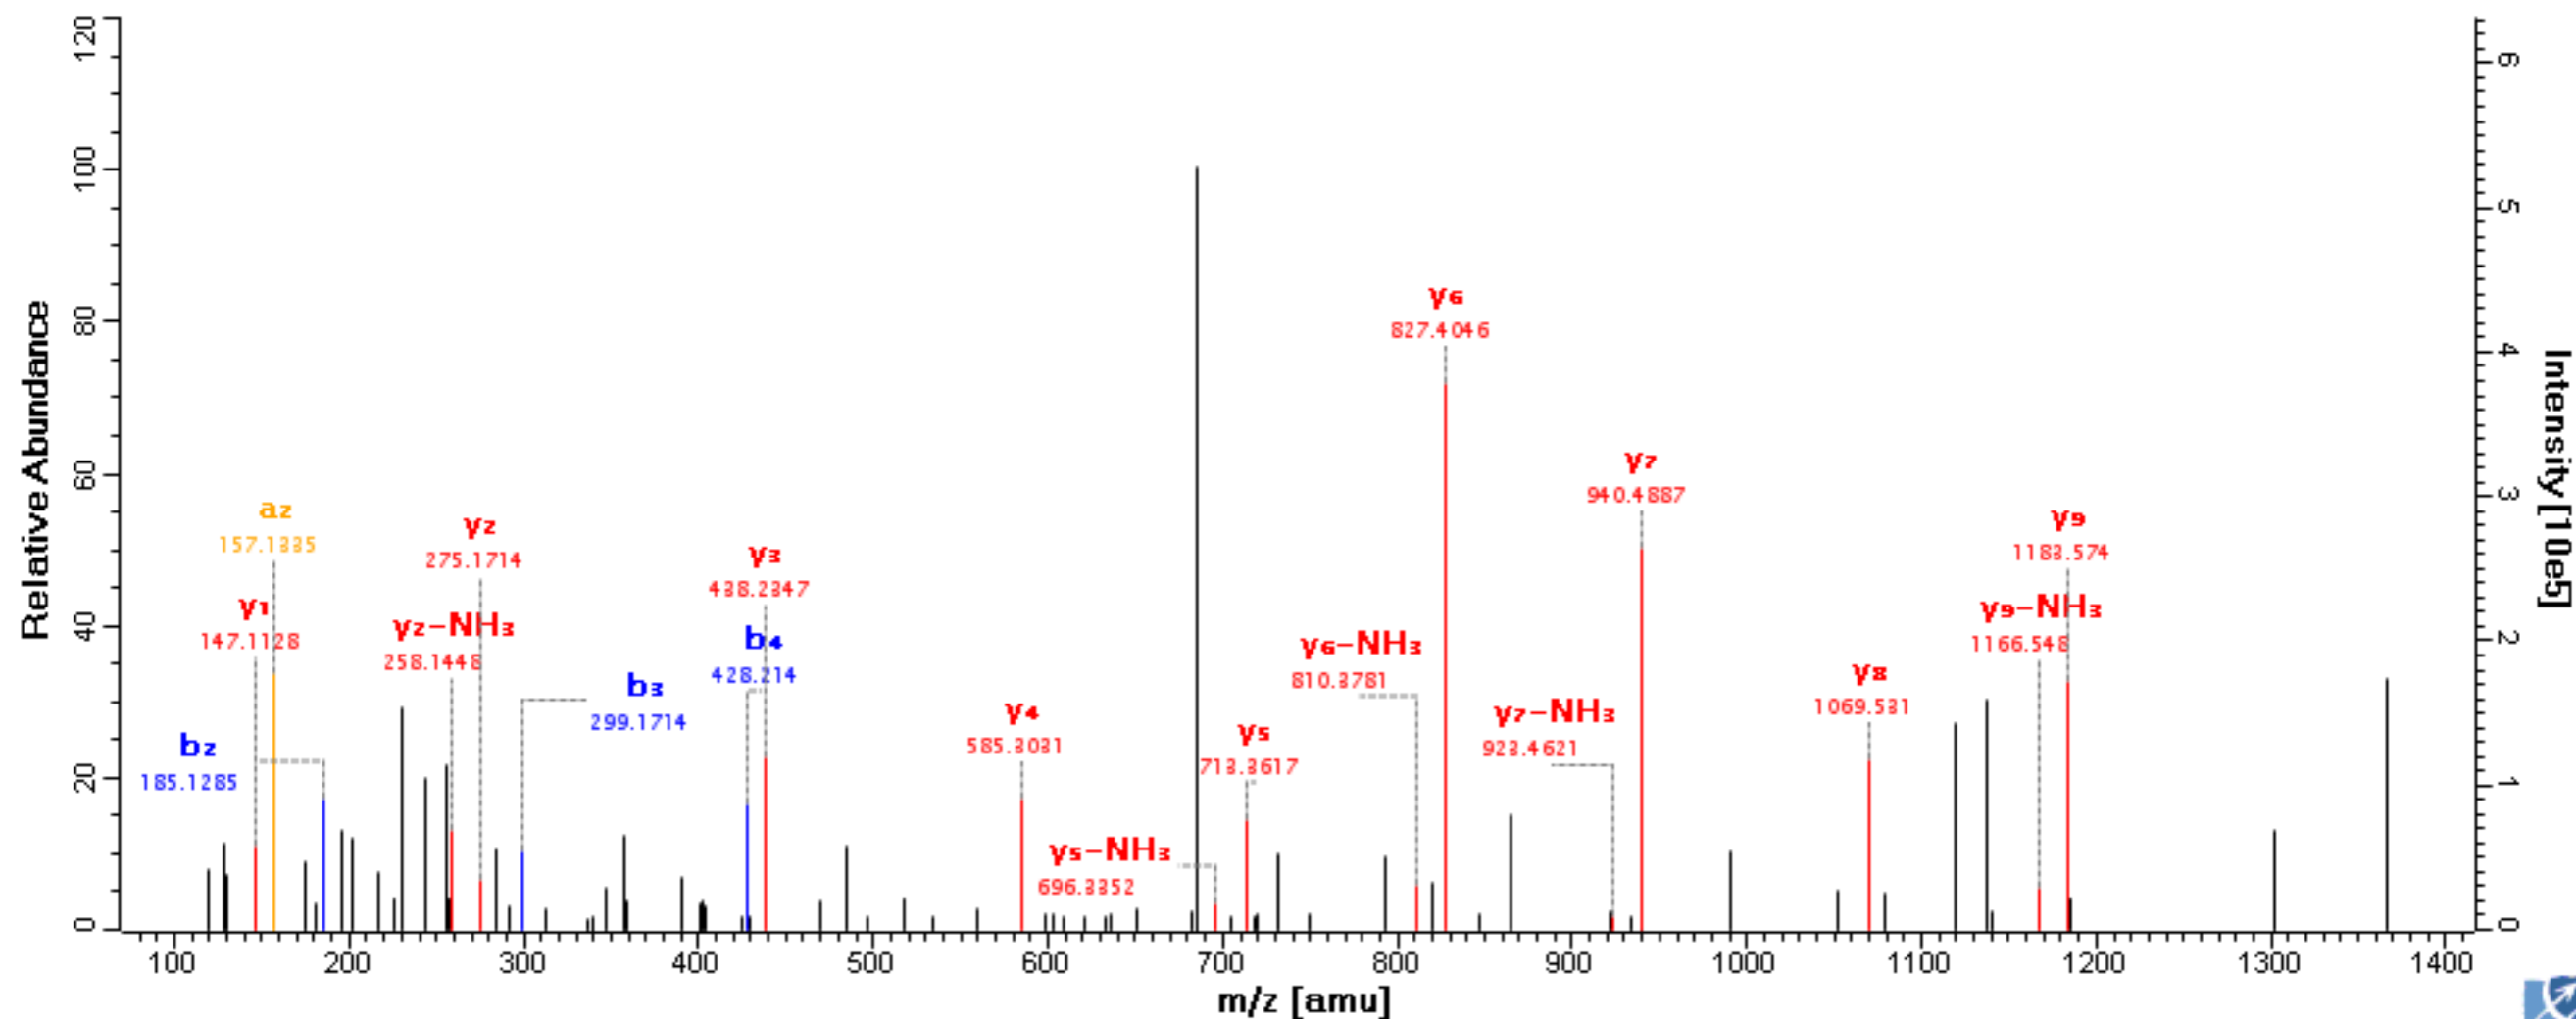

Source: Bibo\_20130531\_RM\_MSC07627\_1\_3  
 Scannumber: 34290  
 Protein: RAL; RALA; P11233  
 Peptide Score: 59.67  
 Method: FTMS; HCD; 1

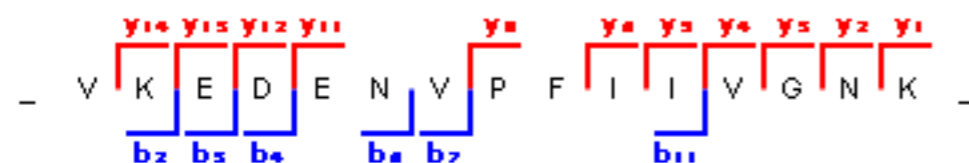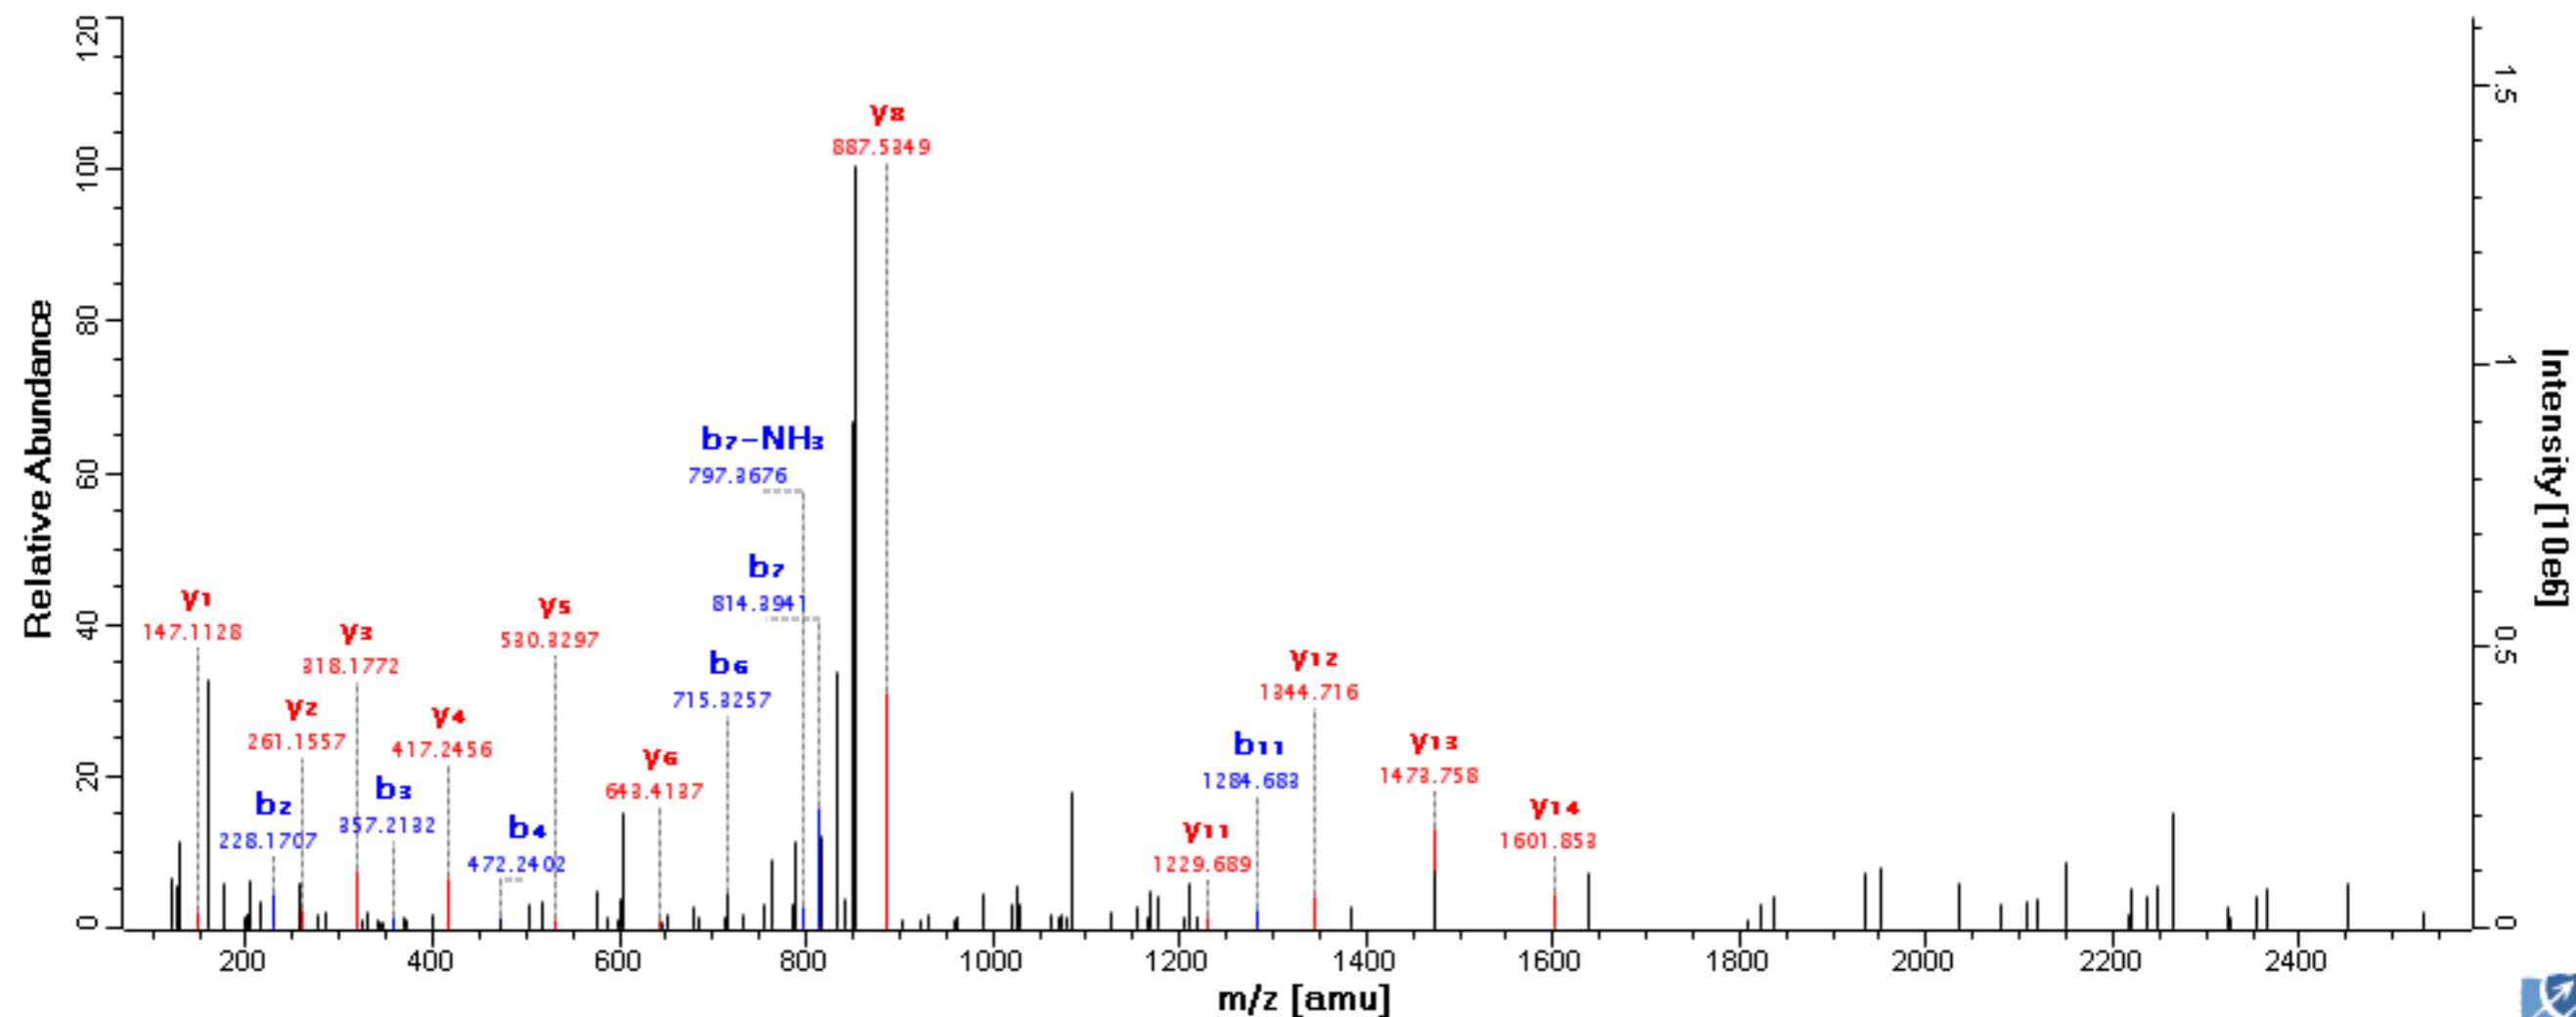

Source: Bibo\_20130531\_RM\_MSC07627\_1\_3

Scannumber: 35359

Protein: PRSS1; TRP1; TRY1; TRYP1; PRSS3; PRSS2; TRY2; TRYP2; PRSS1; hCG\_1770551; tcag7.1285; TRY8; trypsinogen 8; PRSS1; TRP1; TRY1; TRYP1; T6; TRY6; PRSS1; E7EQ64; Q7Z5F3; P07477;

Peptide Score: 72.43

Method: FTMS; HCD; 1

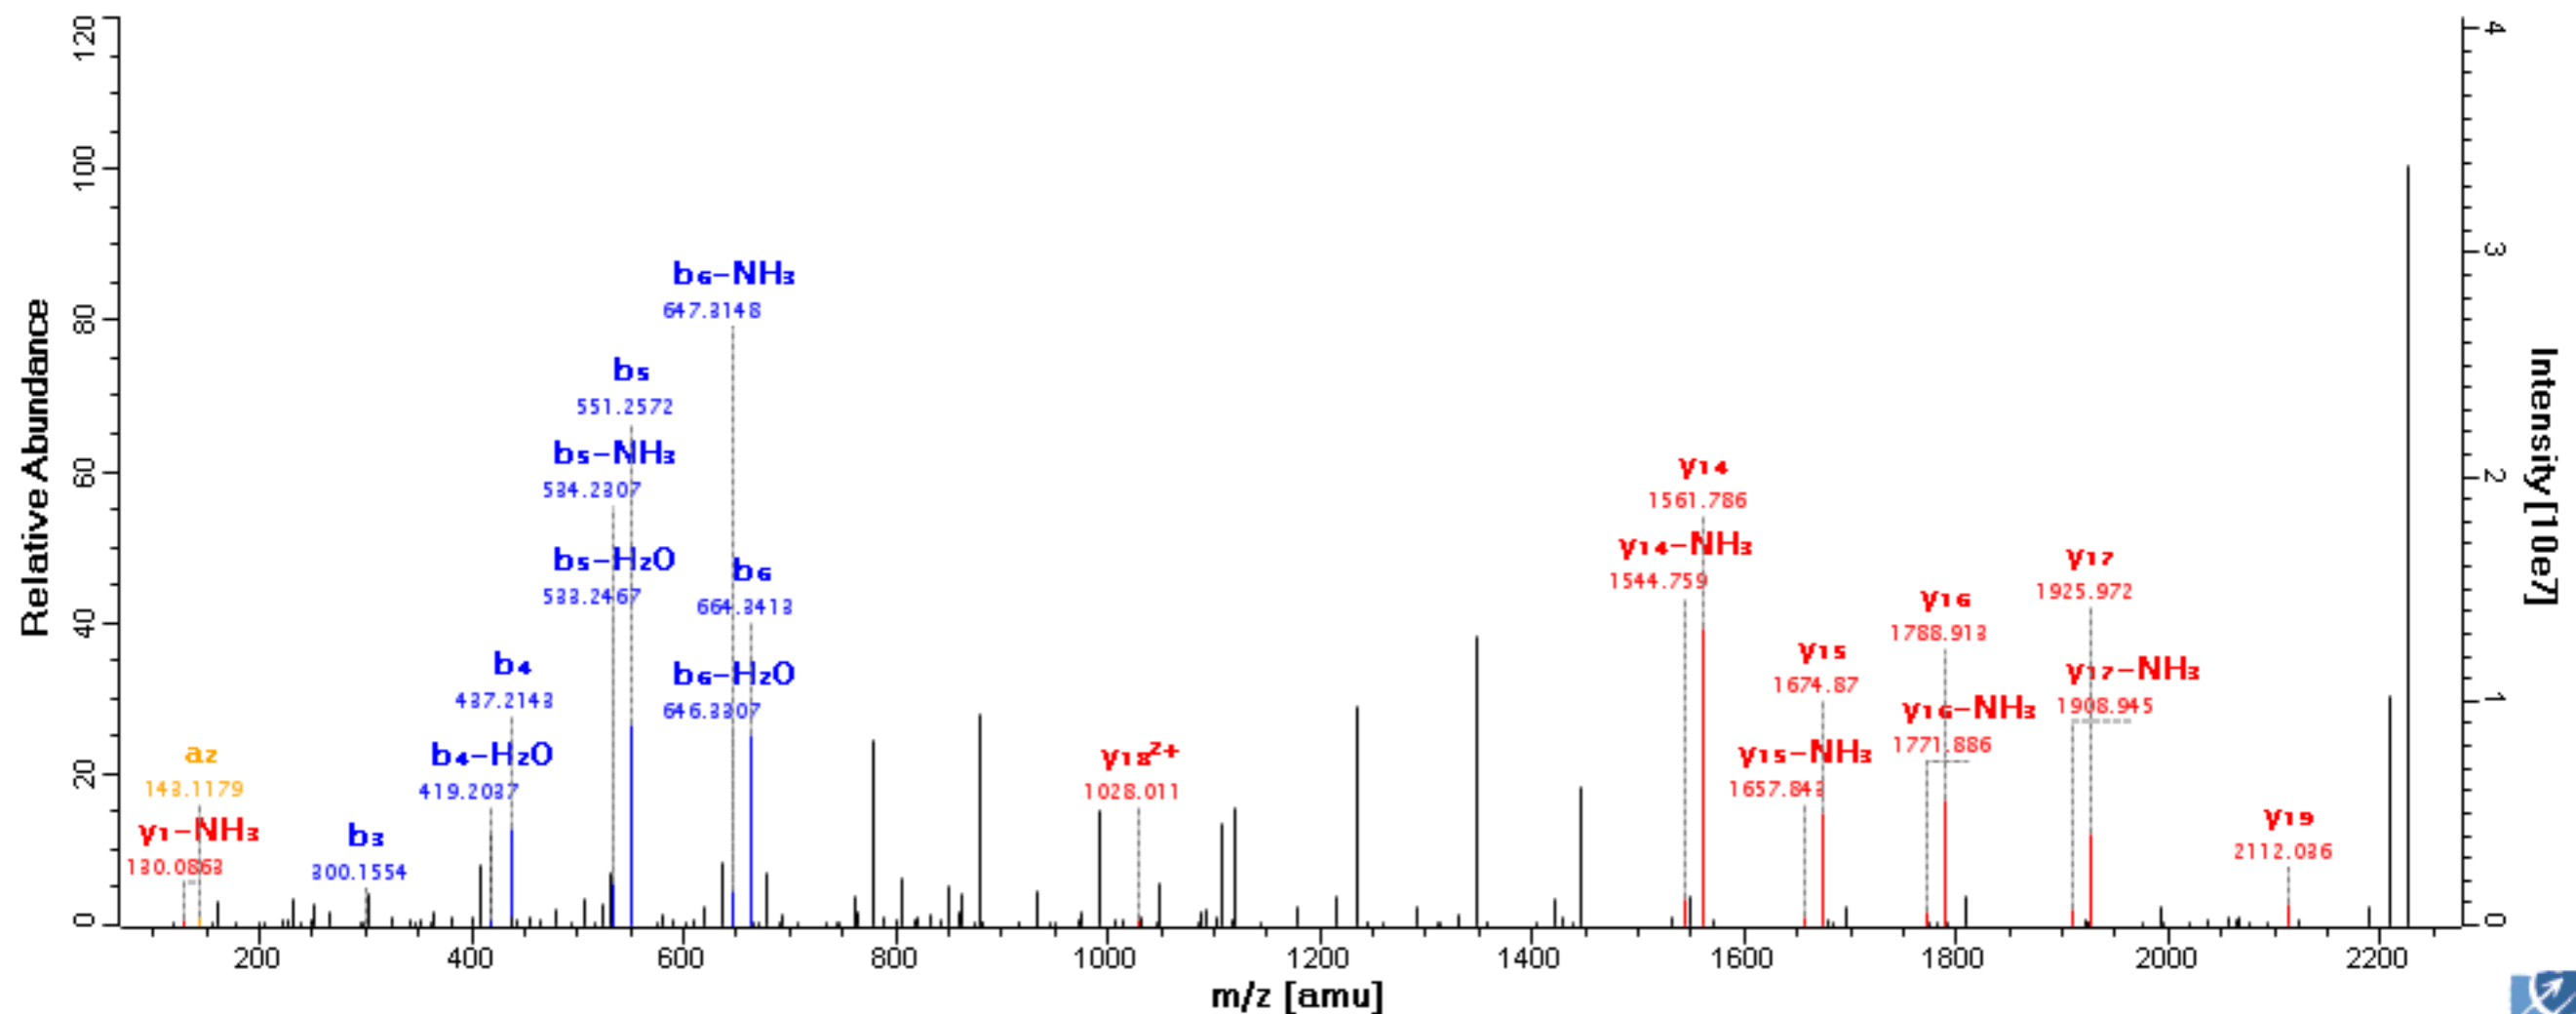

Source: Bibo\_20130531\_RM\_MSC07627\_1\_3  
 Scannumber: 35604  
 Protein: PRSS1; TRP1; TRY1; TRYP1; PRSS3; PRSS2; TRY2; TRYP2; PRSS1; hCG\_1770551; tcag7.1285; TRY8; trypsinogen 8; PRSS1; TRP1; TRY1; TRYP1; T6; TRY6; PRSS1; E7EQ64; Q7Z5F3; P07477;  
 Peptide Score: 80.61  
 Method: FTMS; HCD; 1

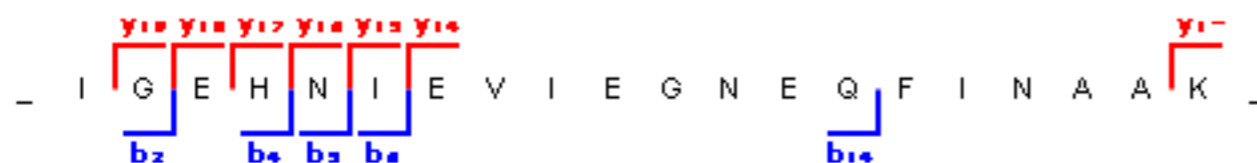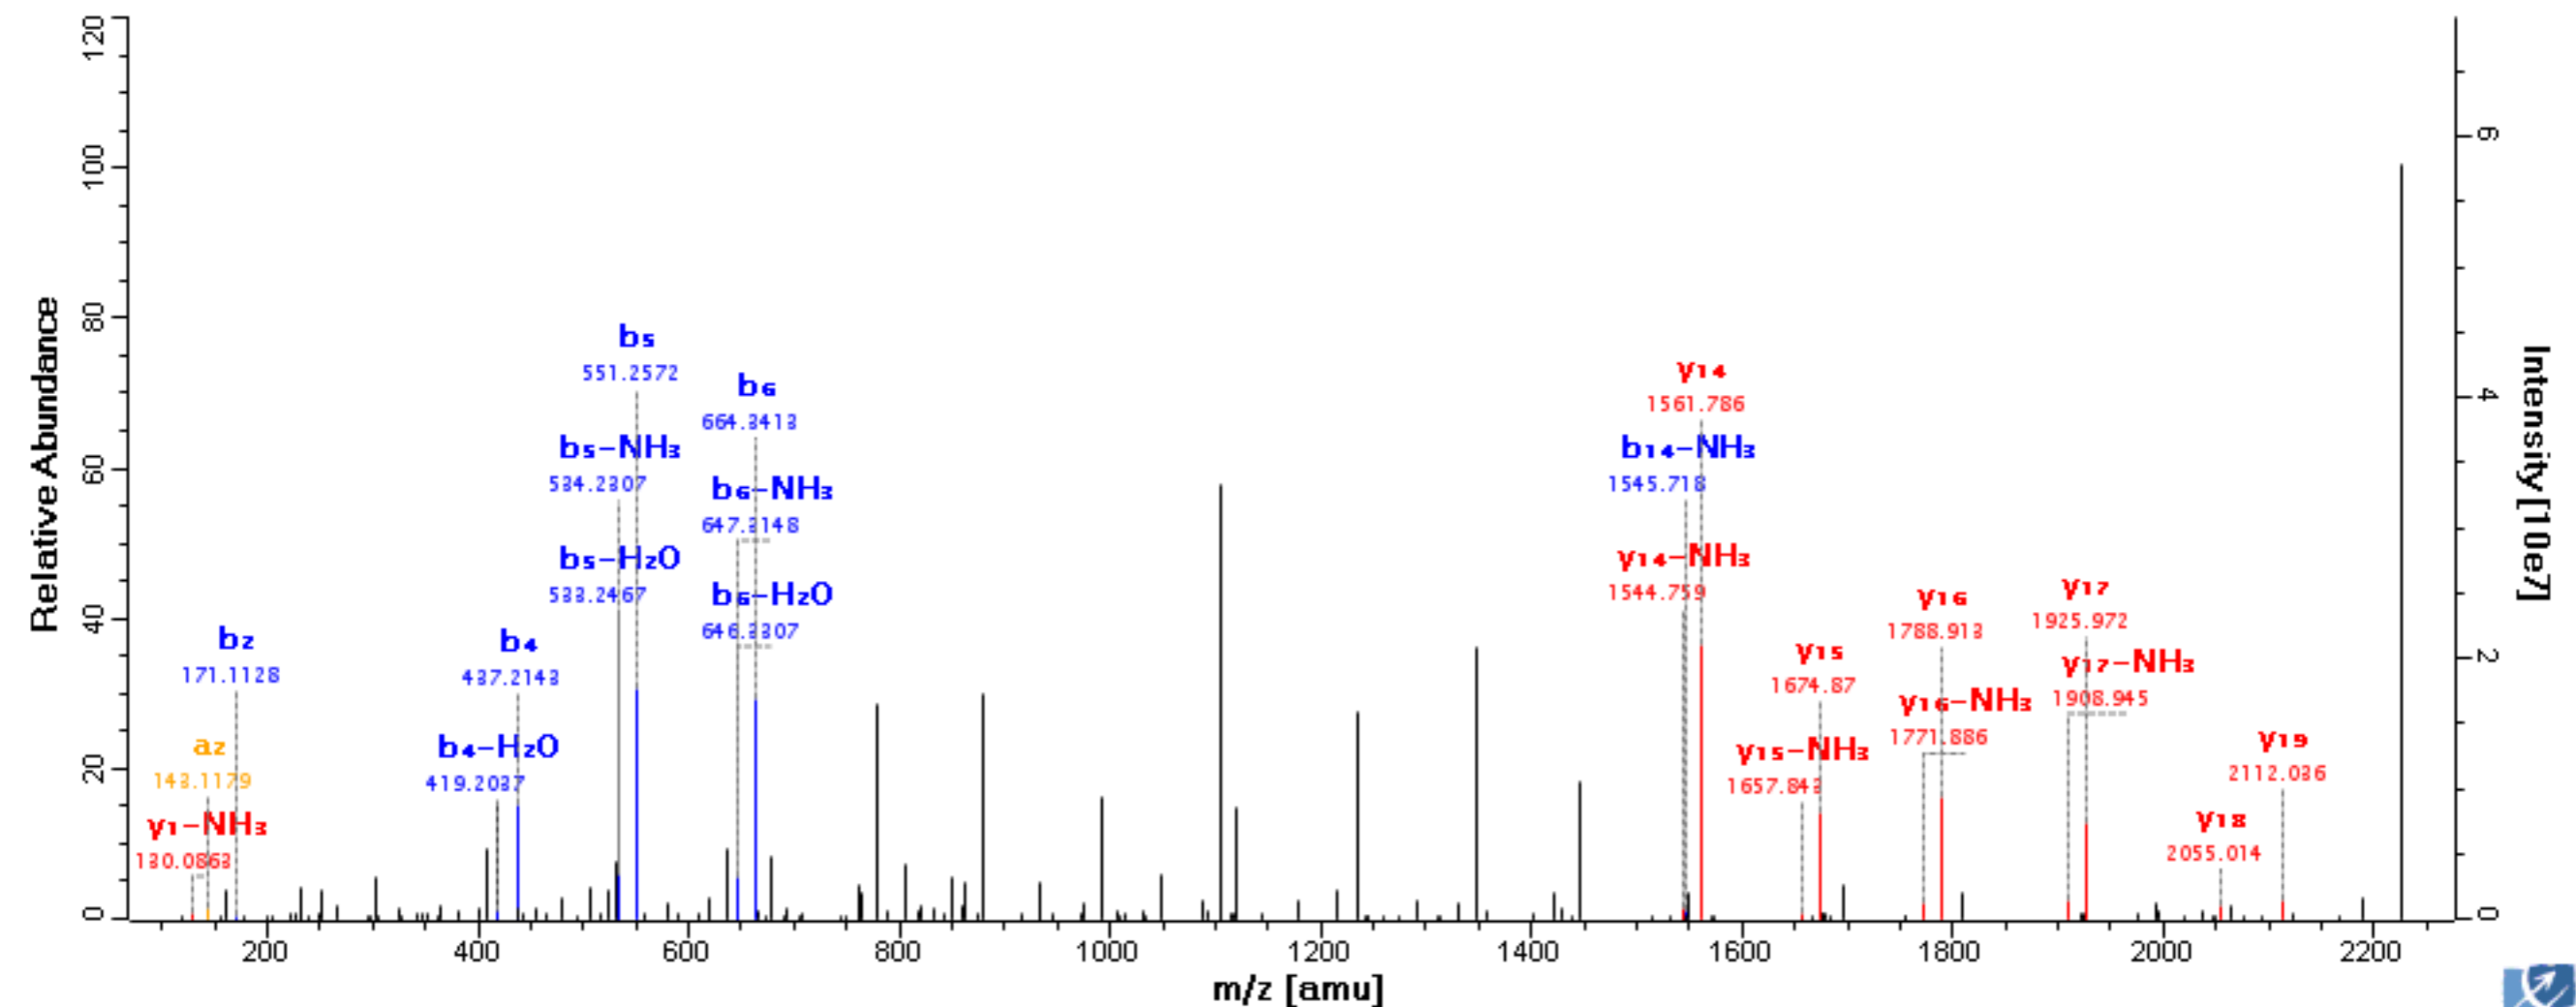

Source: Bibo\_20130531\_RM\_MSC07627\_1\_3  
 Scannumber: 36428  
 Protein: CBX; CBX1; hCG\_2000655; CBX3; CCDC32; hCG\_1745364; hCG\_1999239; tcag7.173; CBX1; P83916; E9PCS5; Q6IBN6; Q13185; A4D177; B5MD17  
 Peptide Score: 105.14  
 Method: FTMS; HCD; 1

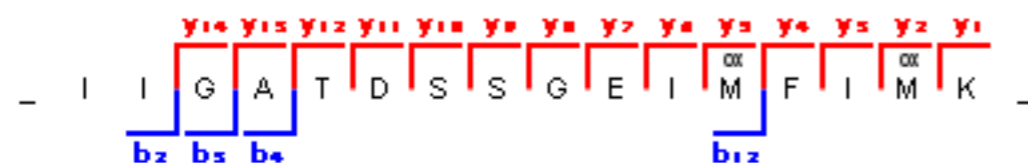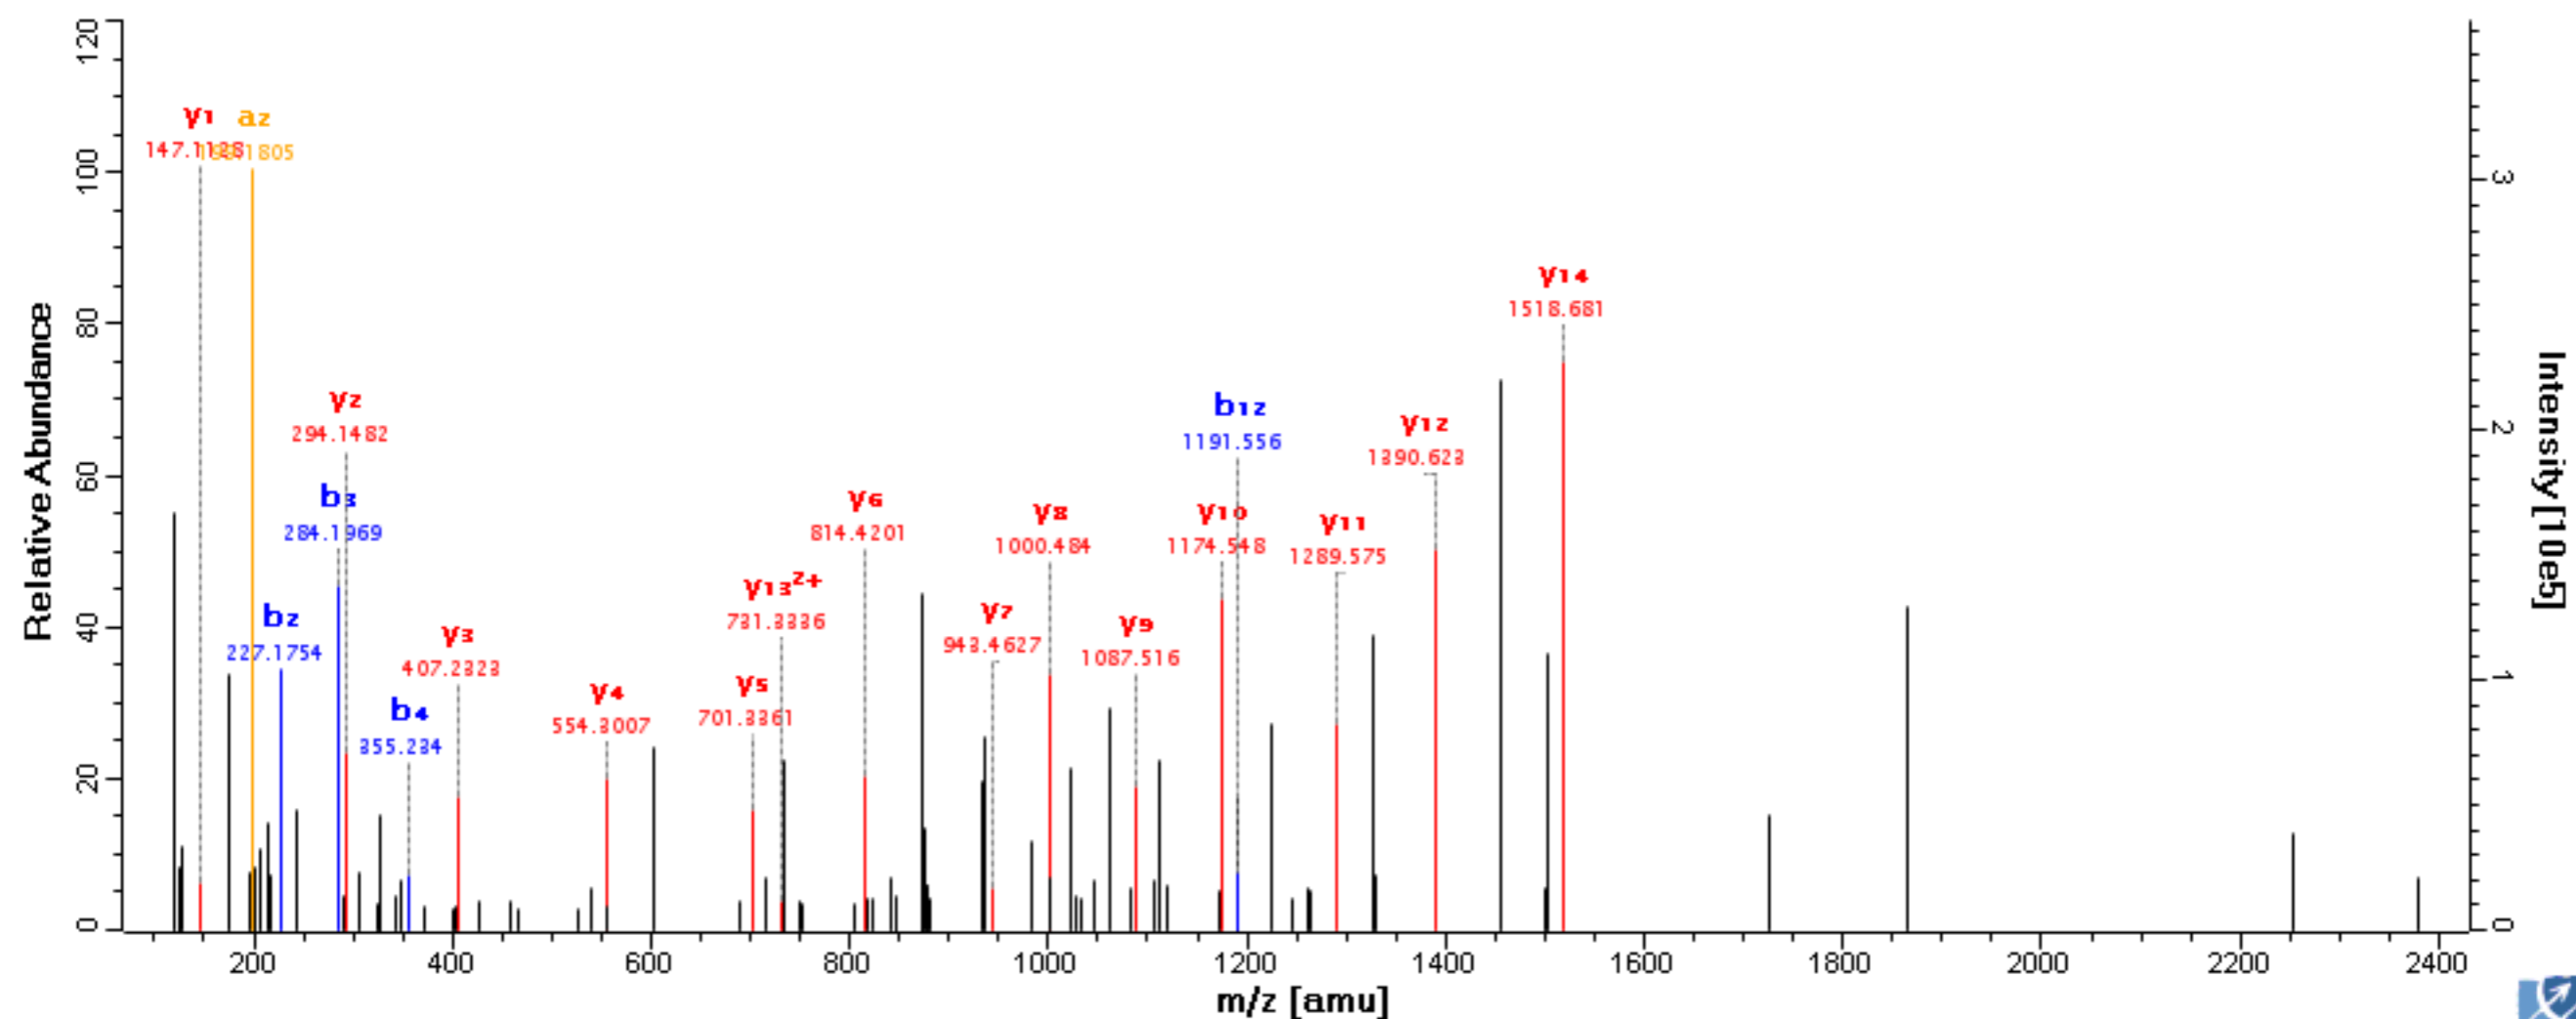

Source: Bibo\_20130531\_RM\_MSC07627\_1\_3  
 Scannumber: 39362  
 Protein: CANX; B4DGP8; P27824; Q16094; D6RDP7; D6RB85; D6RAU8; D6RAQ8; D6RD16; D6RHJ3  
 Peptide Score: 96.59  
 Method: FTMS; HCD; 1

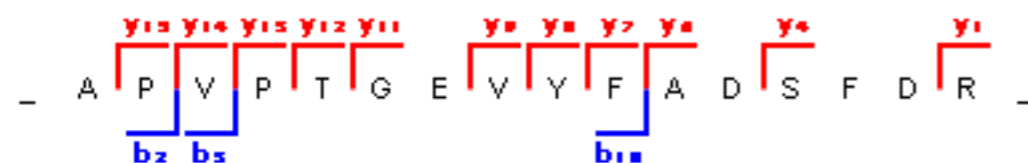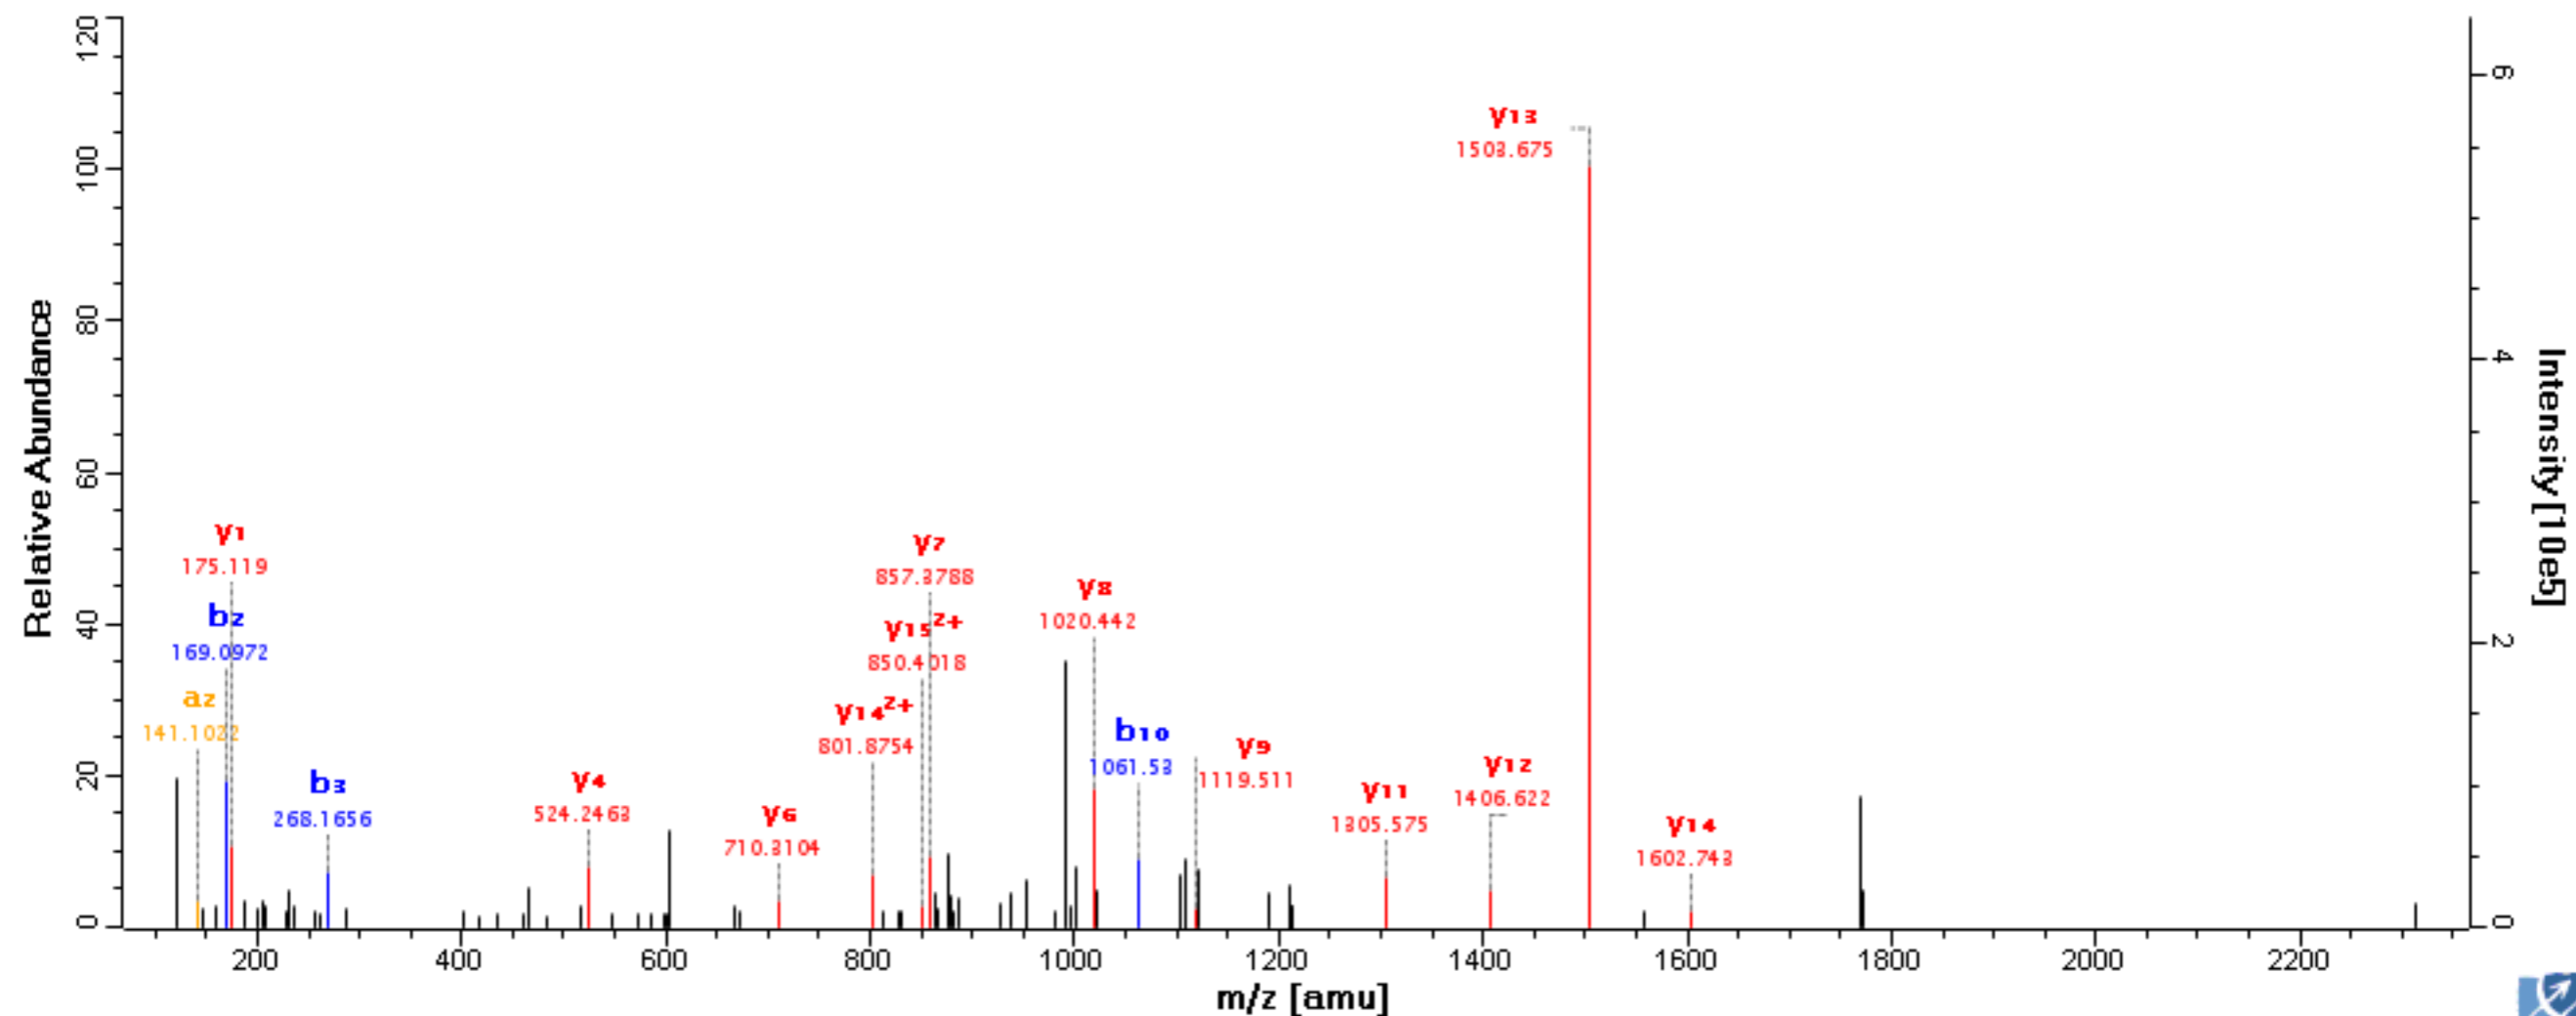

Source: Bibo\_20130531\_RM\_MSC07627\_1\_3  
 Scannumber: 39837  
 Protein: EBNA1BP2; EBP2; hCG\_2031782; RP5-1034F7.2-001; Q99848; Q6IB29; B4DHA6; B4DRX8; E7EW98  
 Peptide Score: 60.03  
 Method: FTMS; HCD; 1

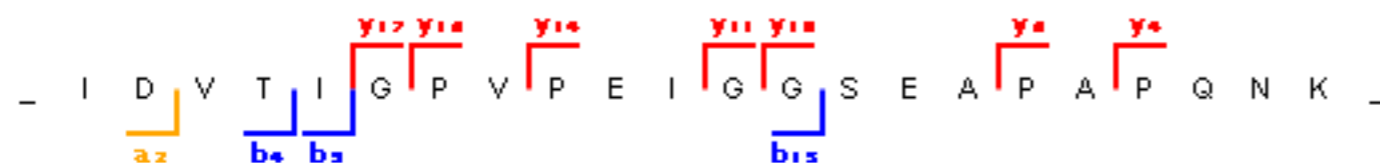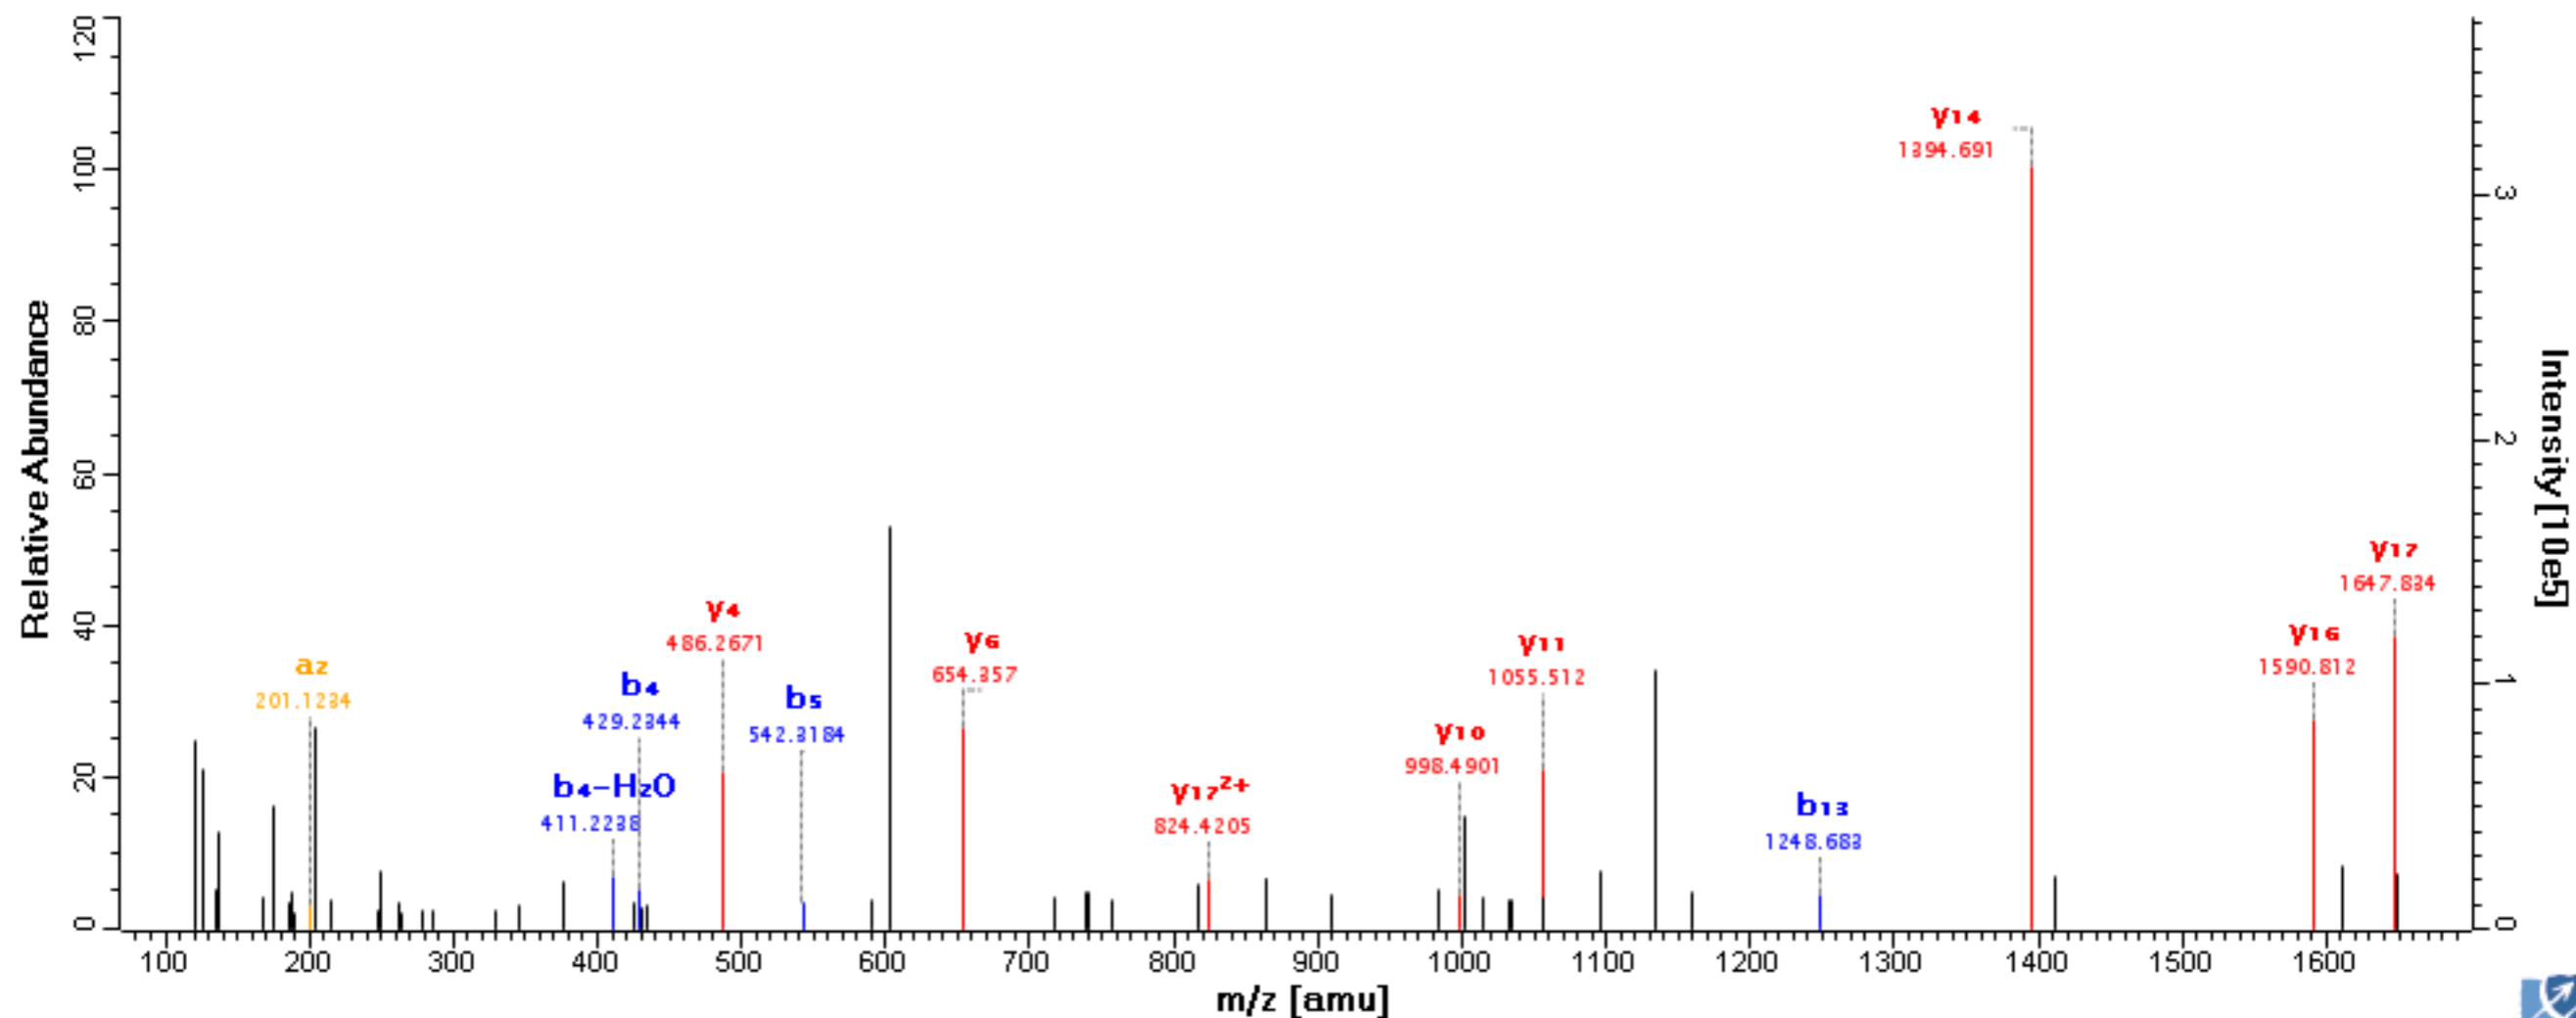

Source: Bibo\_20130531\_RM\_MSC07627\_1\_3  
Scannumber: 42147  
Protein: IPI00984483  
Peptide Score: 0.58  
Method: FTMS; HCD; 1

\_ E W N G M E W N G M E W N A M E W N A M E W N A M E W <sup>y<sub>2</sub></sup>K <sup>y<sub>1</sub></sup>R \_

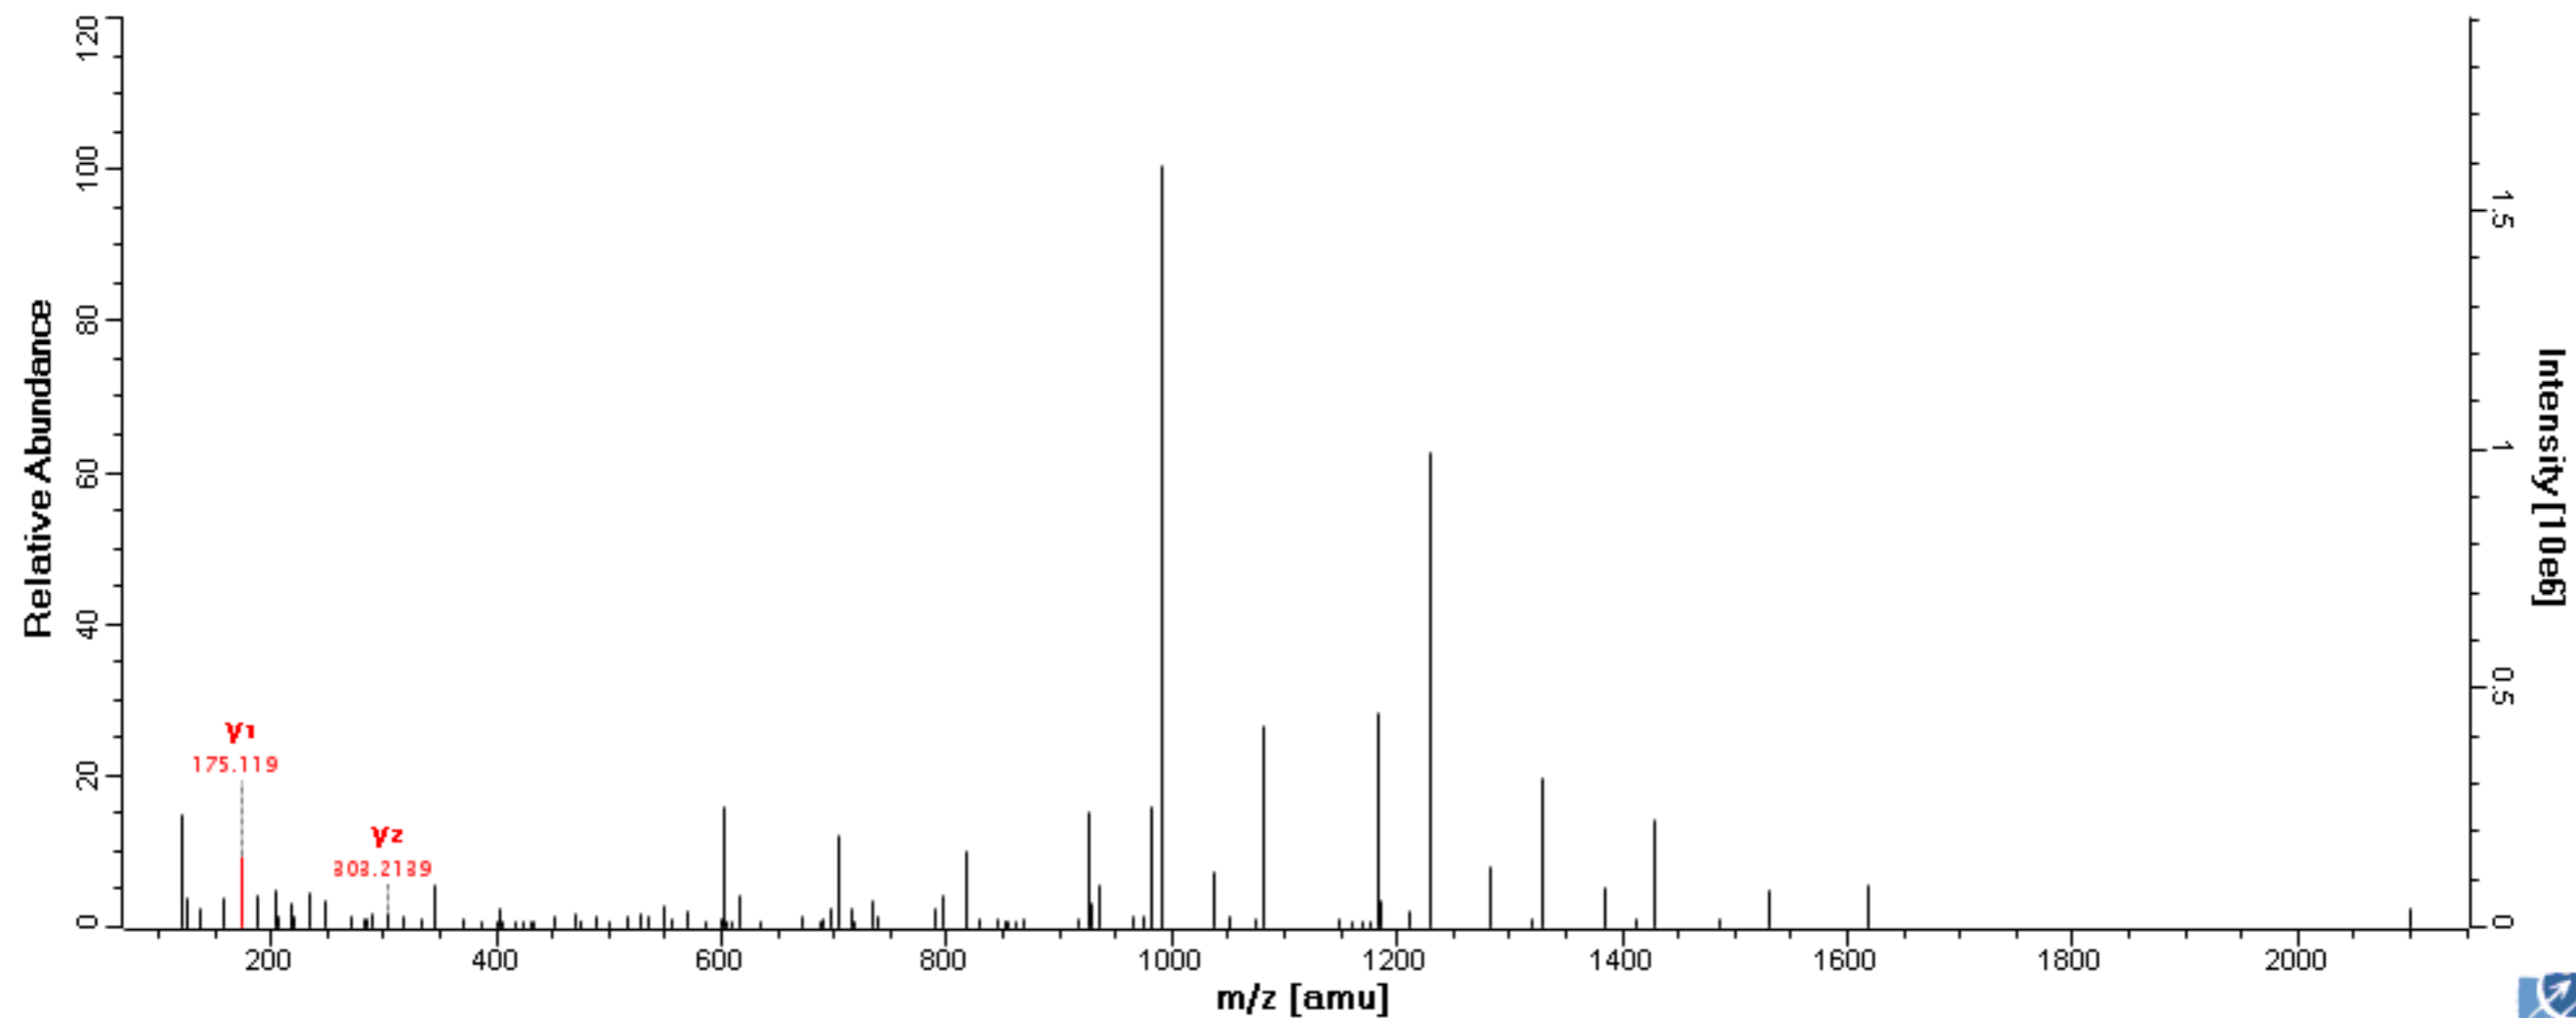

Source: Bibo\_20130531\_RM\_MSC07627\_1\_3  
 Scannumber: 42686  
 Protein: ATP5C; ATP5C1; ATP5CL1; hCG\_25112; RP11-401E9.1-001; ATP5C; ATP5C1; ATP5CL1; P36542-1; P36542; Q6I9V2; Q8TAS0; P36542-2; P36542; B4DFE6; B4DL14  
 Peptide Score: 16.14  
 Method: FTMS; HCD; 1

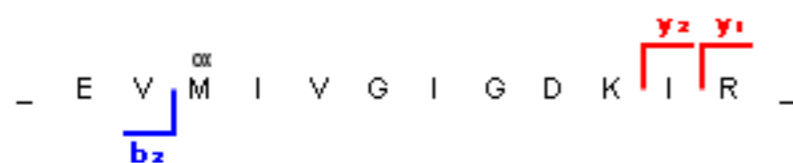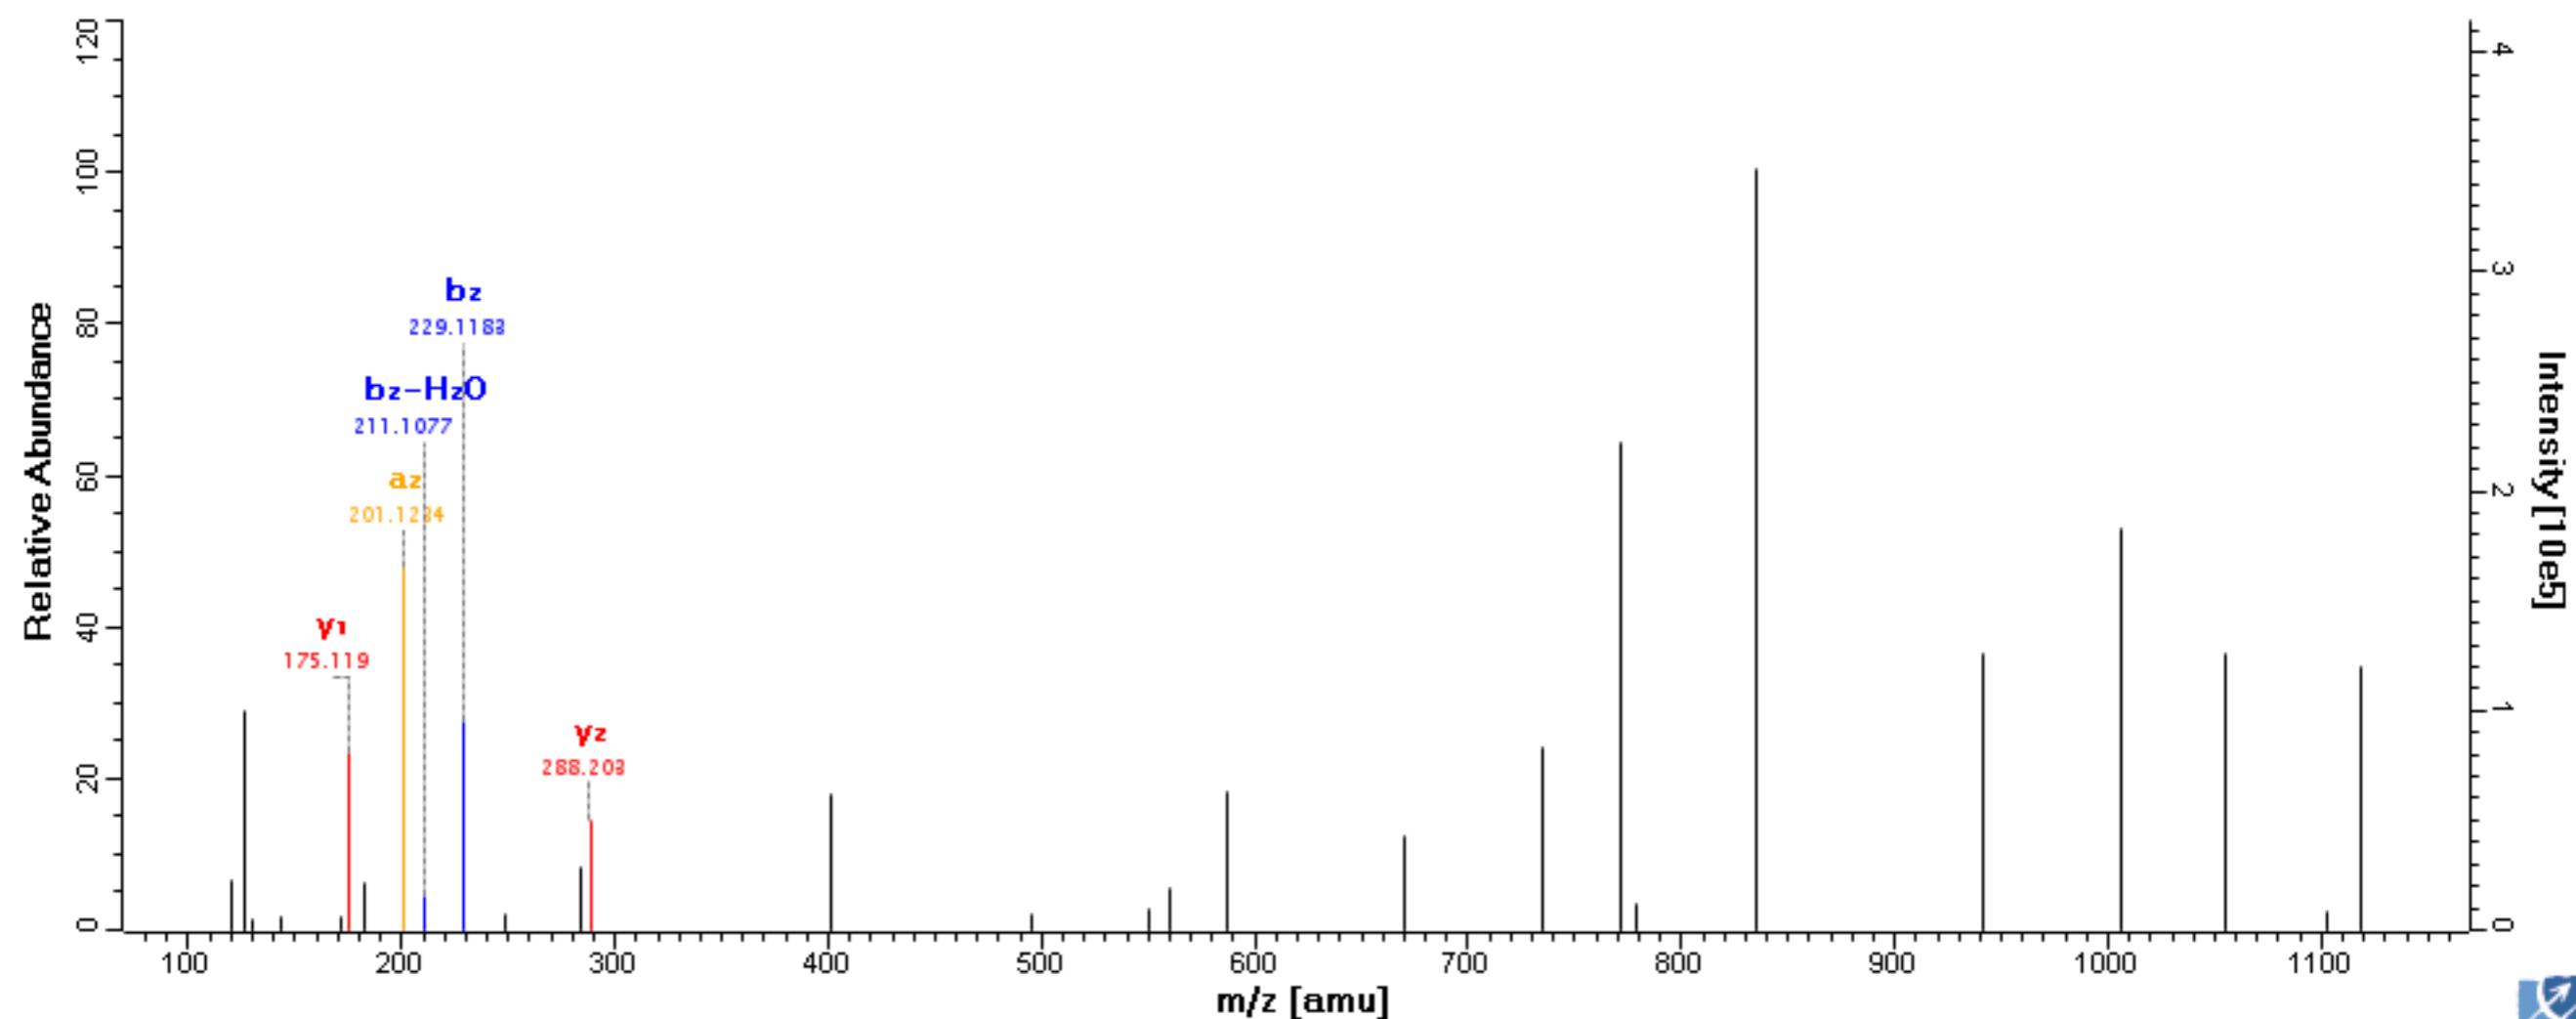

Source: Bibo\_20130531\_RM\_MSC07627\_1\_3  
Scannumber: 43234  
Protein: meis1; B7Z4 T5; E9PDC4; Q9HCQ4  
Peptide Score: 0.75  
Method: FTMS; HCD; 1

ac ox  
- M Q P V H H I N H G P P I H S H Q Y P H T A H T N A M A P S M G S S V N D A I K R -

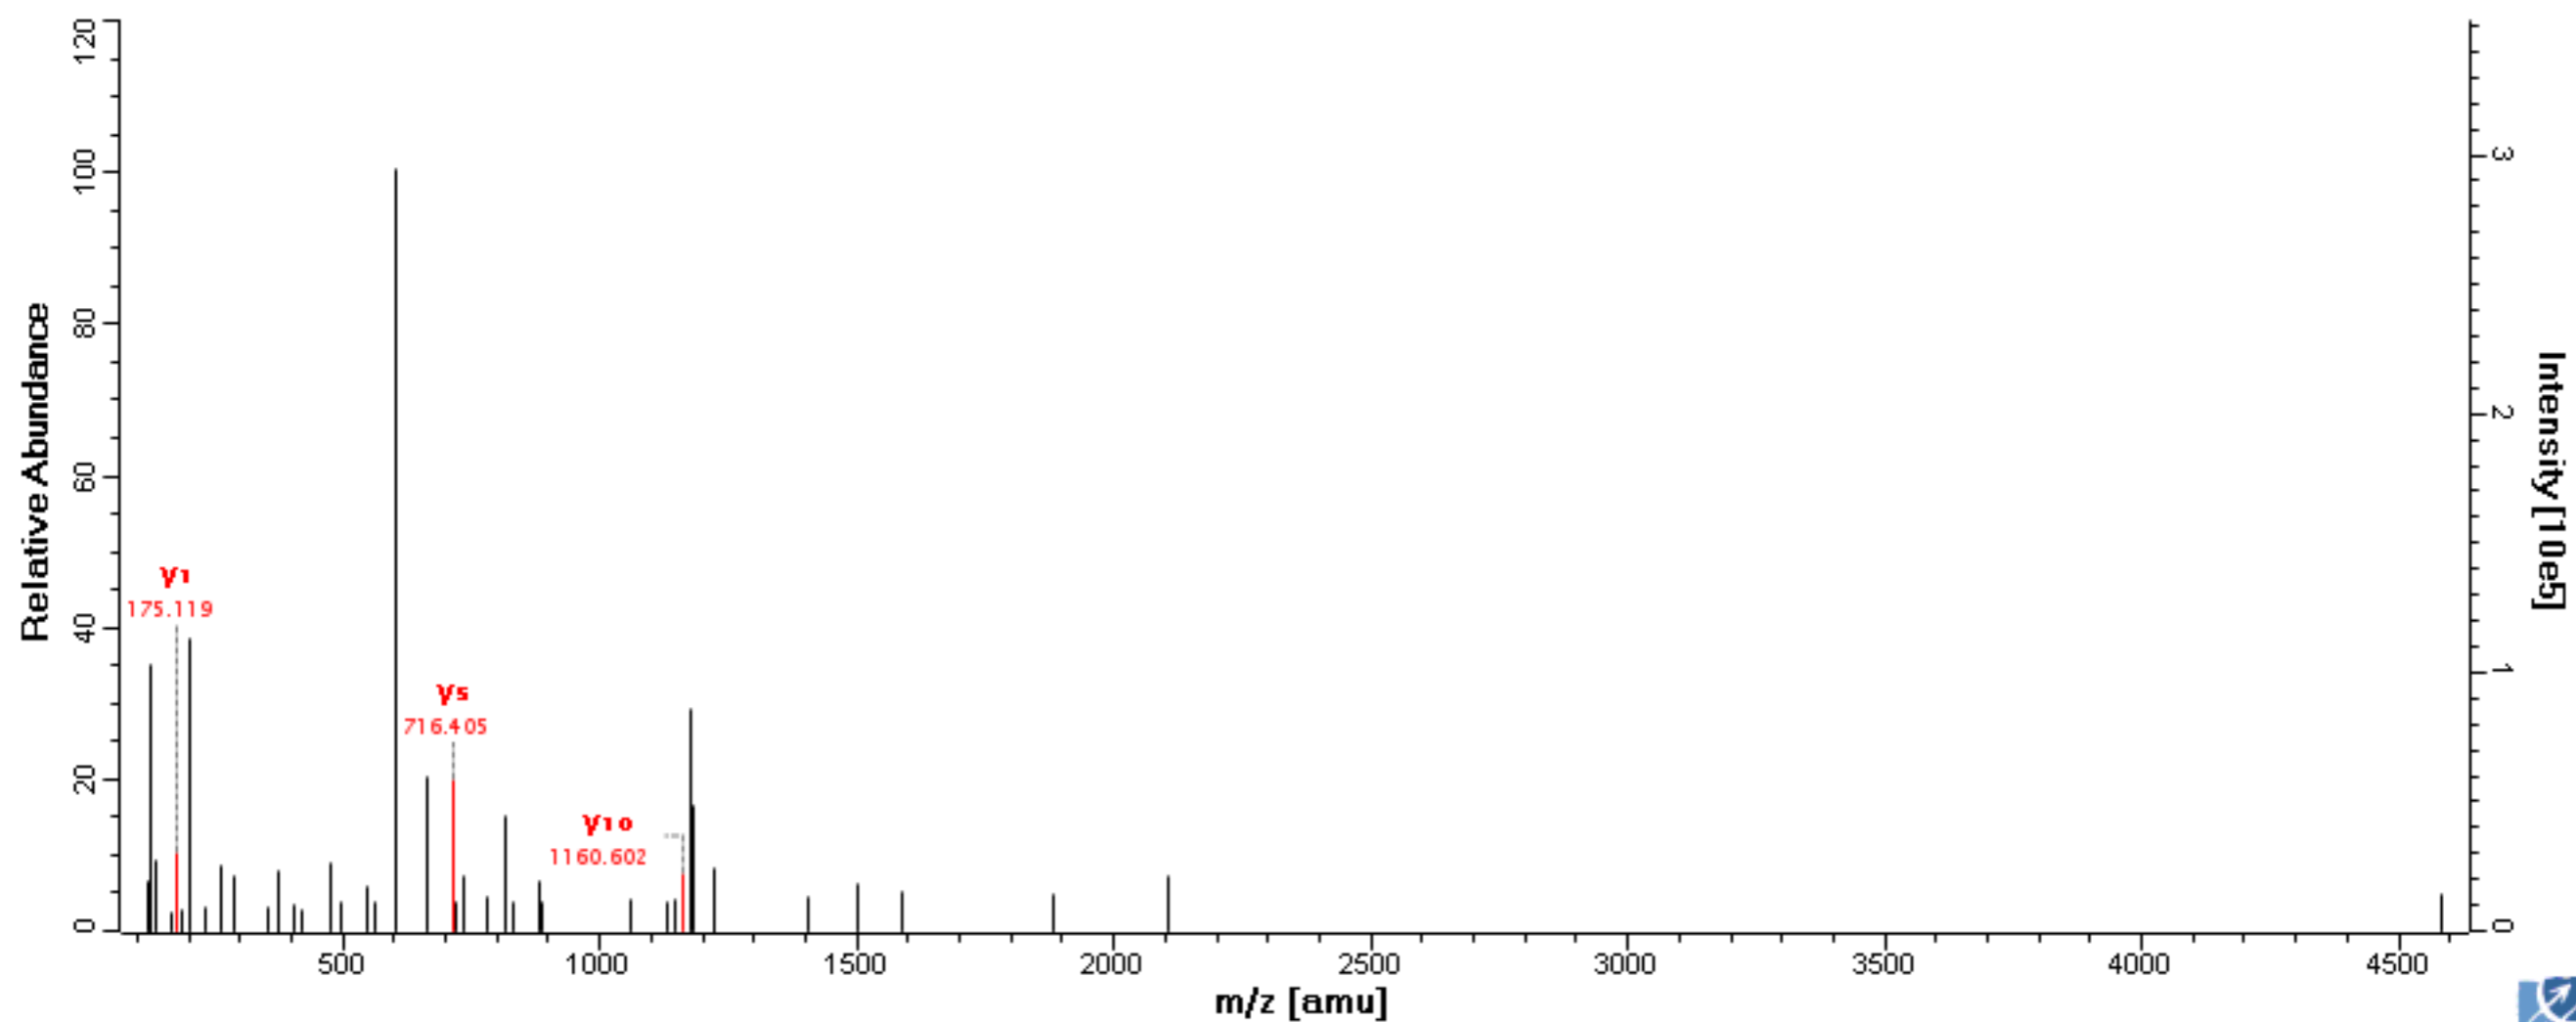

Source: Bibo\_20130531\_RM\_MSC07627\_1\_3  
Scannumber: 43256  
Protein: IPI00984483  
Peptide Score: 0.07  
Method: FTMS; HCD; 1

<sup>ac</sup> \_ E W N G <sup>ox</sup> M E W N G <sup>ox</sup> M E W N A <sup>ox</sup> M E W N A <sup>ox</sup> M E W N A M E W <sup>gl</sup> K <sup>y1</sup> R \_

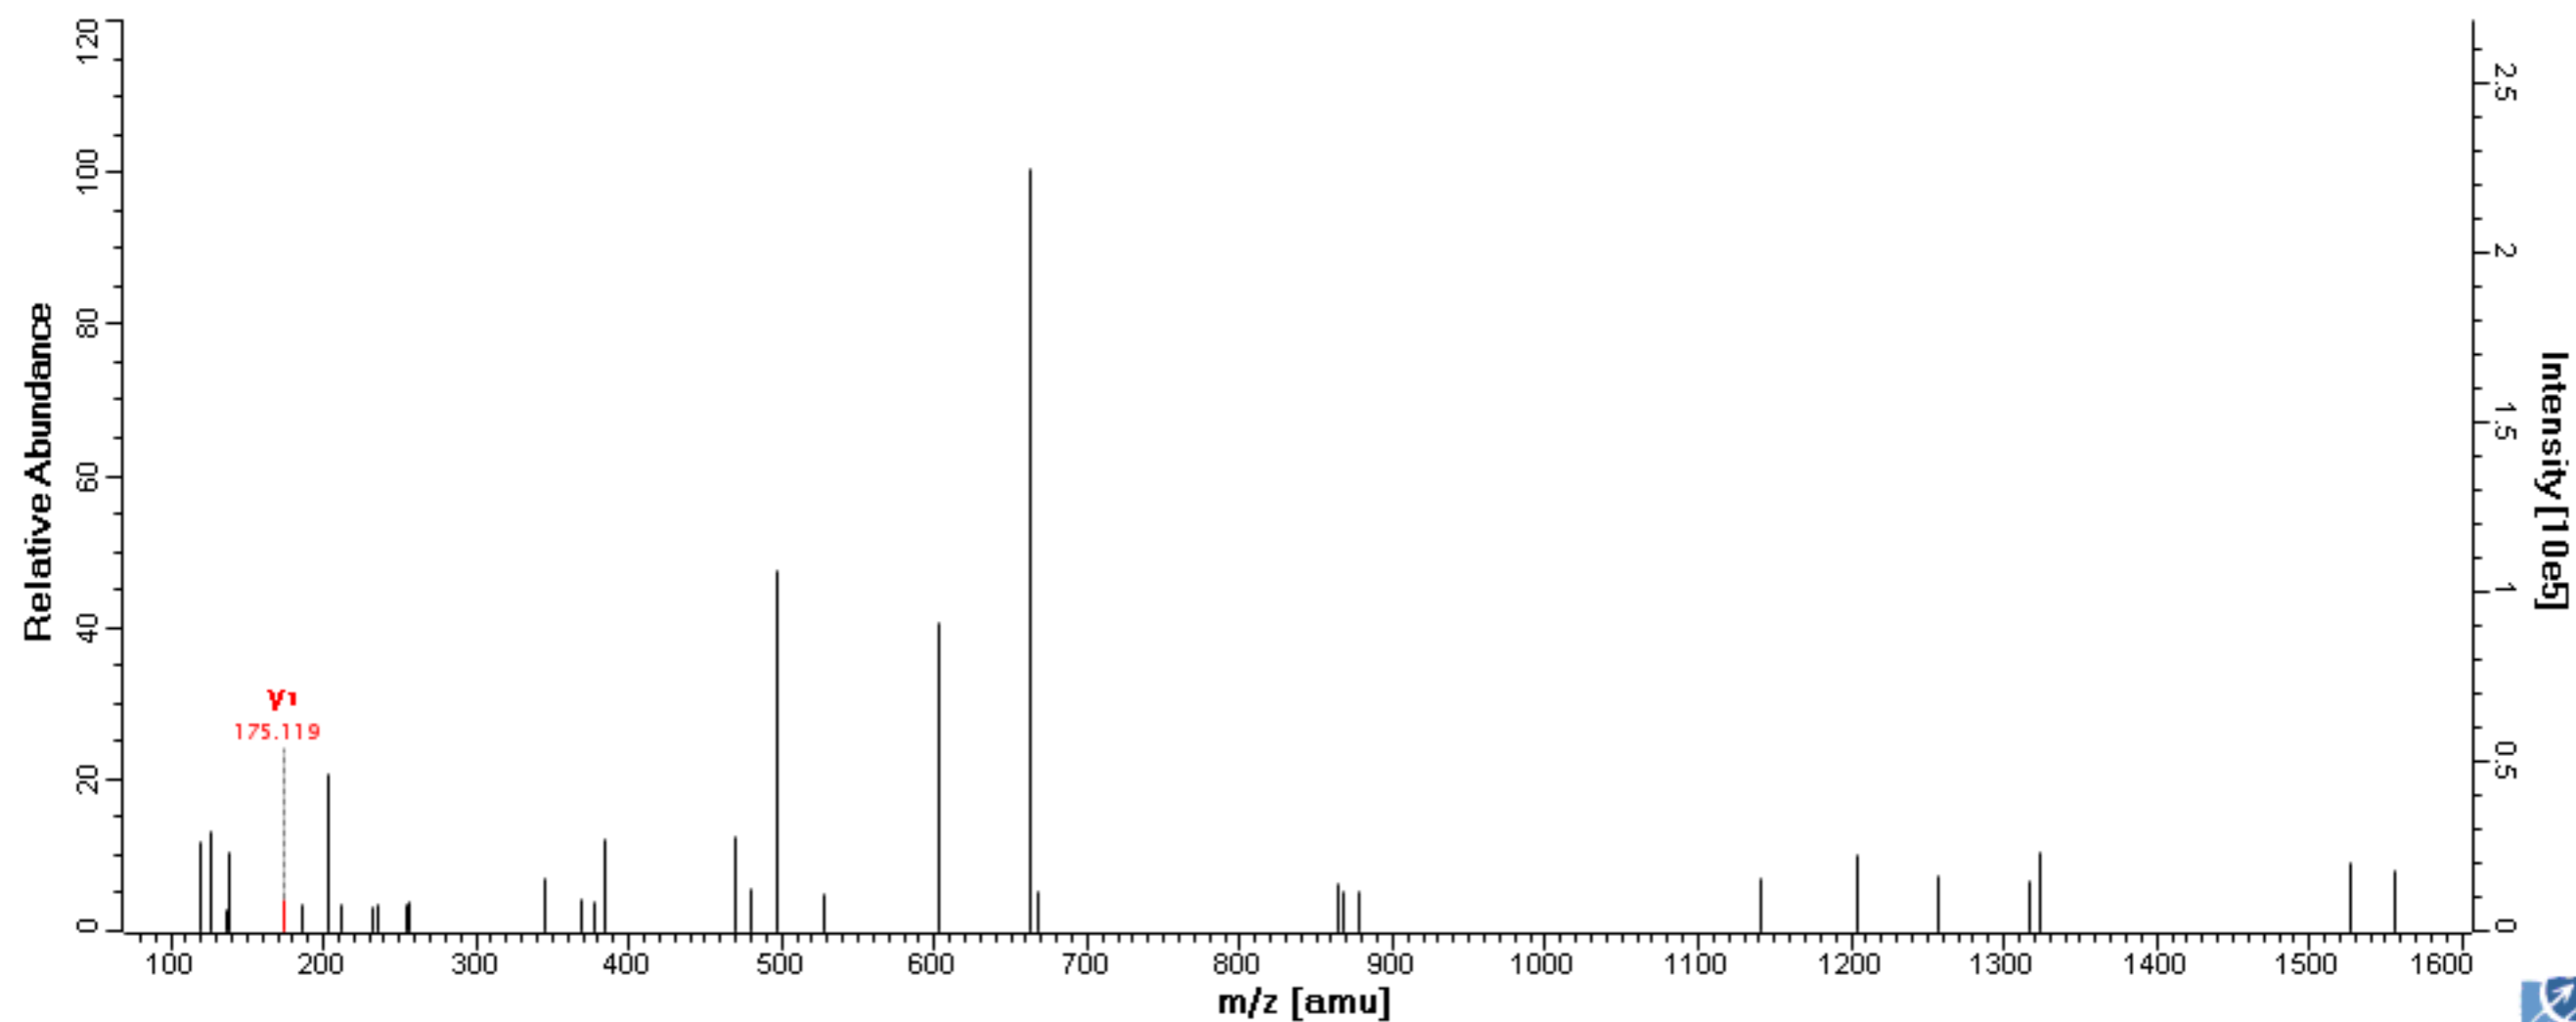

Source: Bibo\_20130531\_RM\_MSC07627\_1\_3  
Scannumber: 43650  
Protein: IPI00984483  
Peptide Score: 0.19  
Method: FTMS; HCD; 1

ac E W N G M E W N G M E W N A M E W N A M E W N A M E W K R

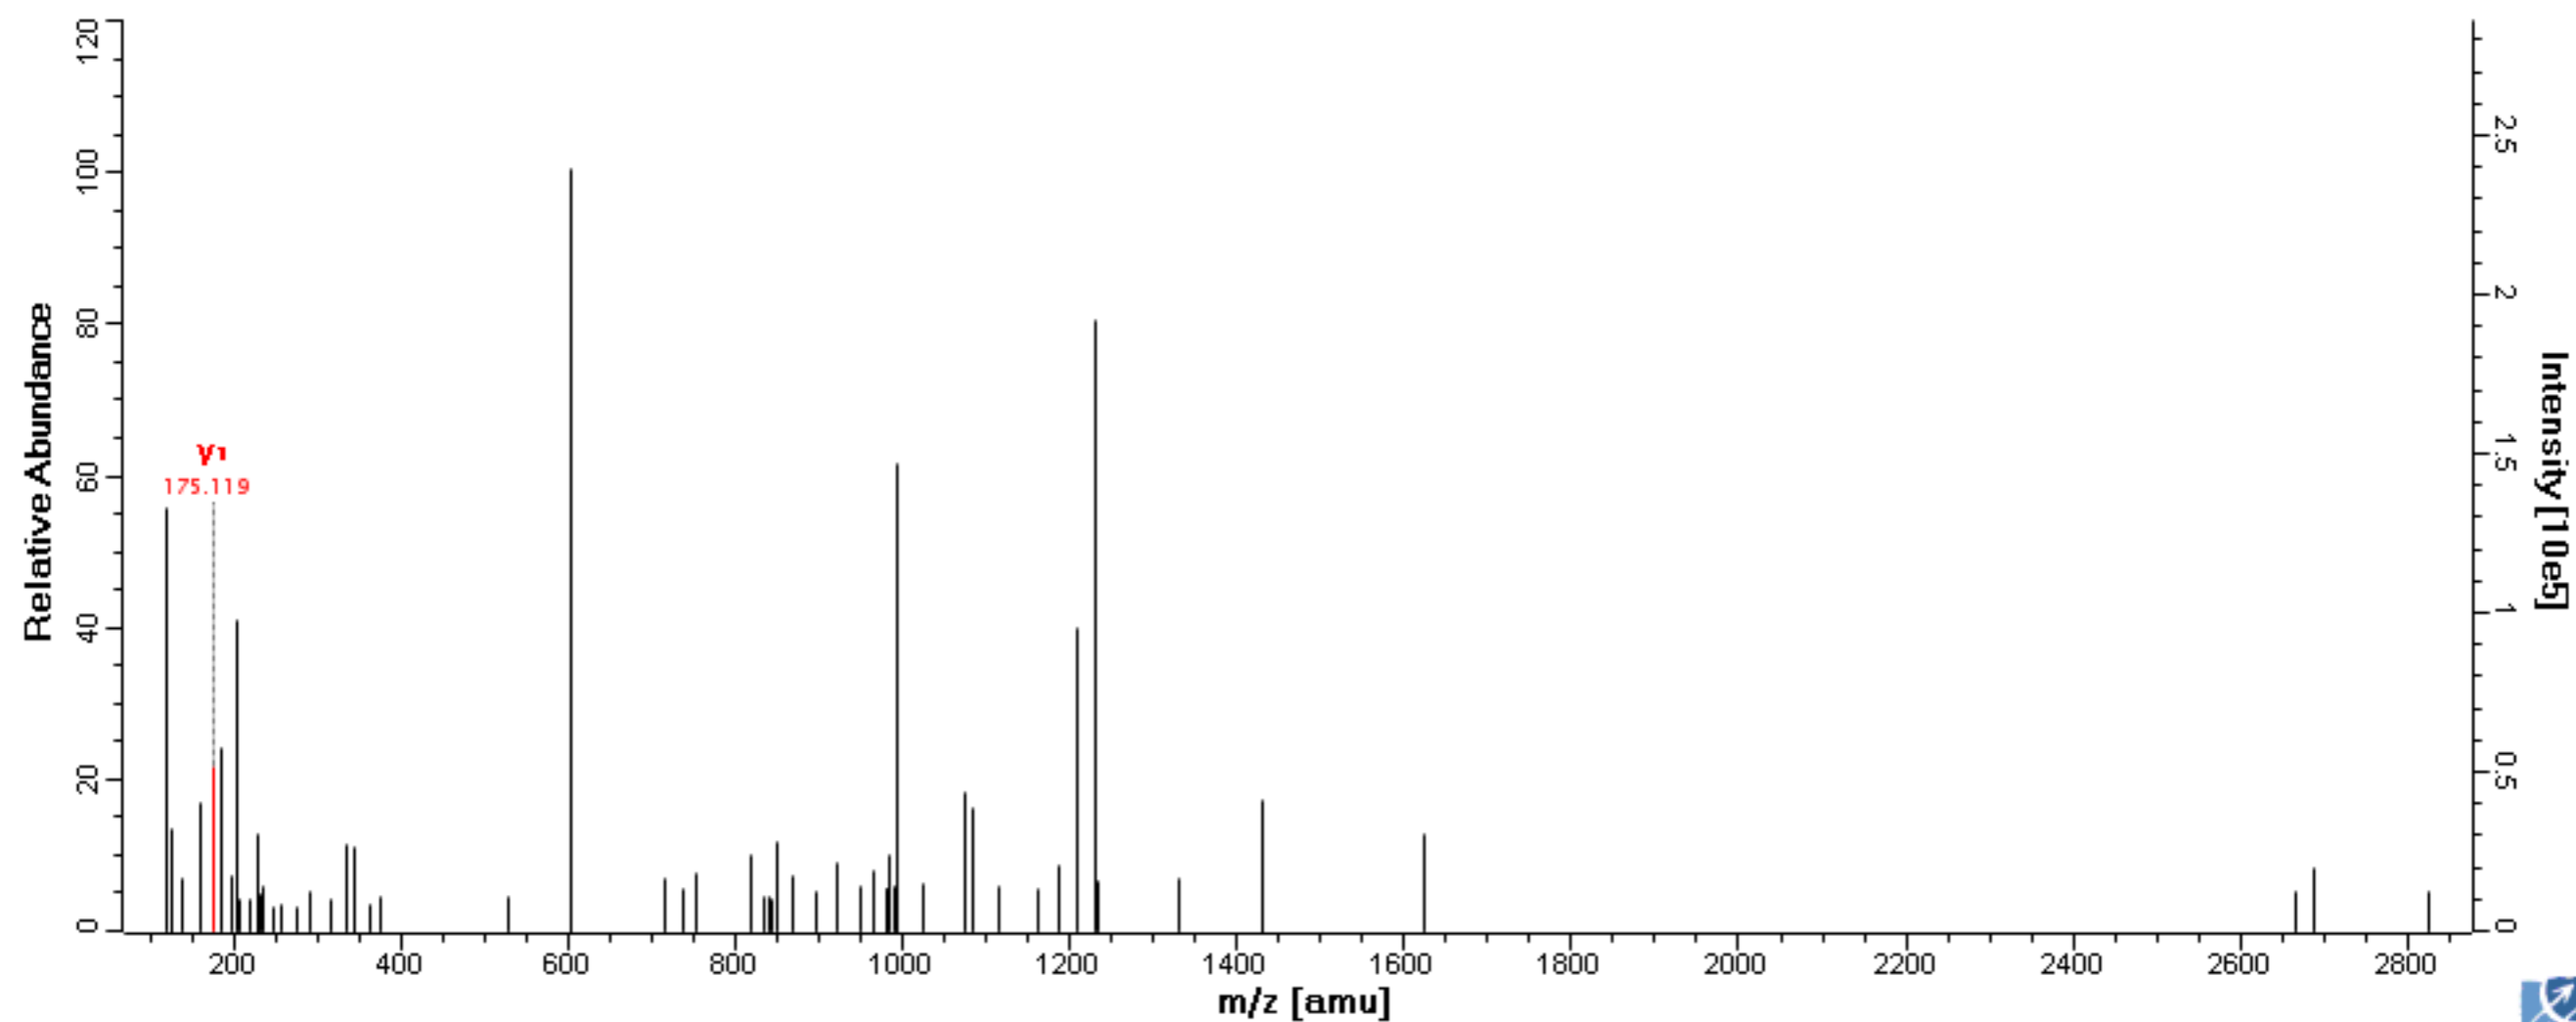

Source: Bibo\_20130531\_RM\_MSC07627\_1\_3  
 Scannumber: 44640  
 Protein: EEF1B; EEF1B2; EF1B; hCG\_19809; LOC392793; tcag7.1190; EEF1B2; P24534; A4D1M6; C9JZW3; F2Z2G2  
 Peptide Score: 113.76  
 Method: FTMS; HCD; 1

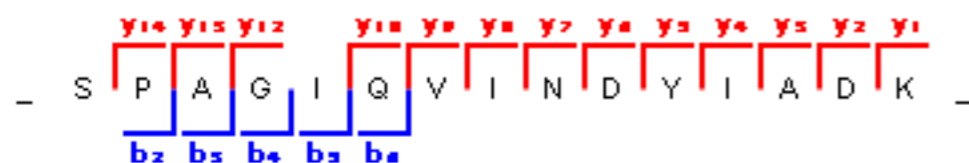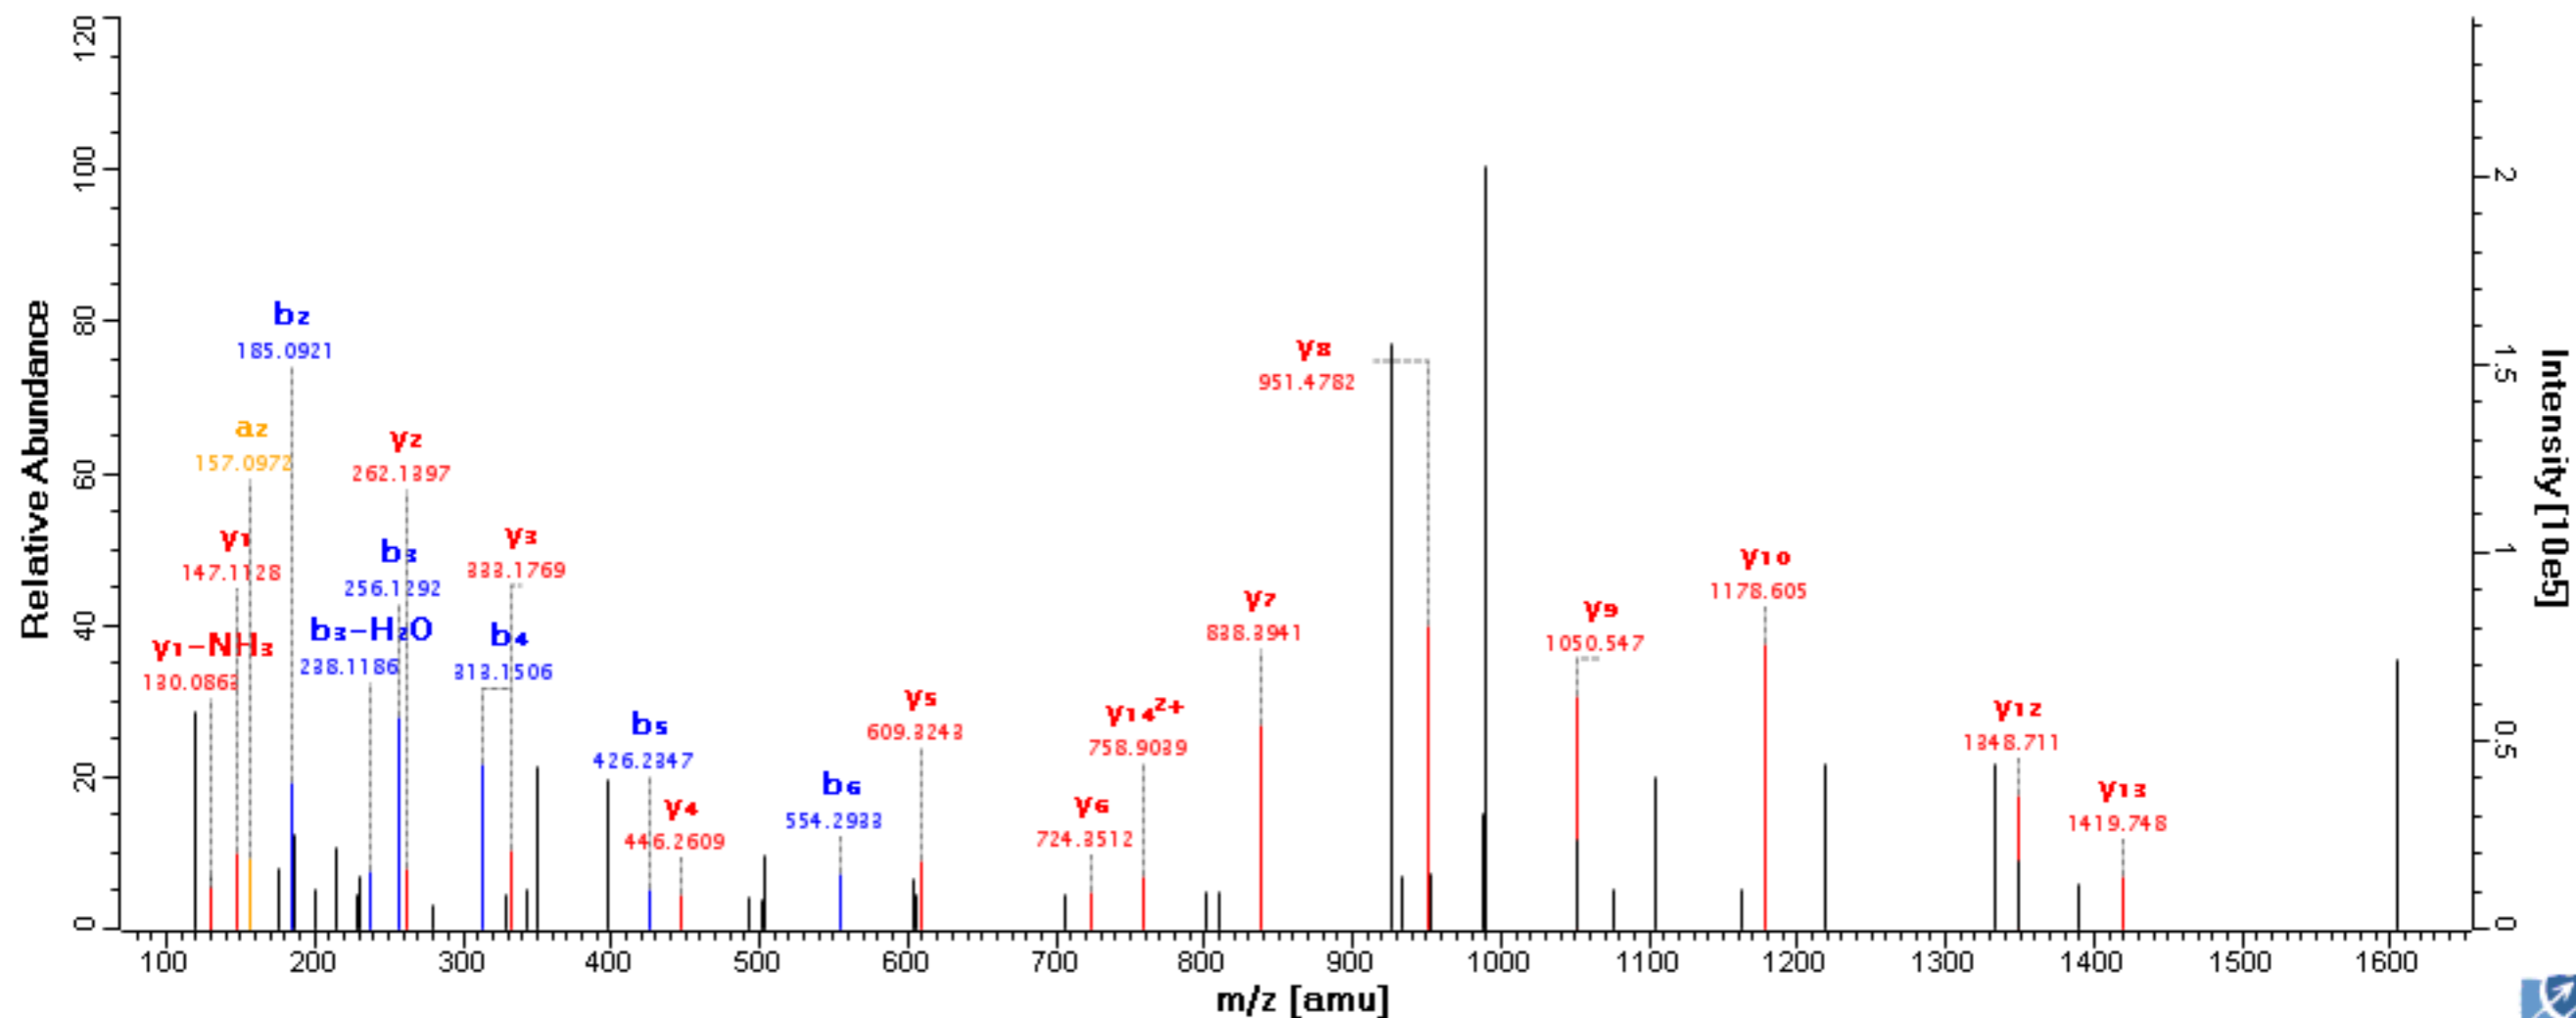

Source: Bibo\_20130531\_RM\_MSC07627\_1\_3  
 Scannumber: 44856  
 Protein: CAGB; CFAG; MRP14; S100A9; P06702; B2R4M6  
 Peptide Score: 68.03  
 Method: FTMS; HCD; 1

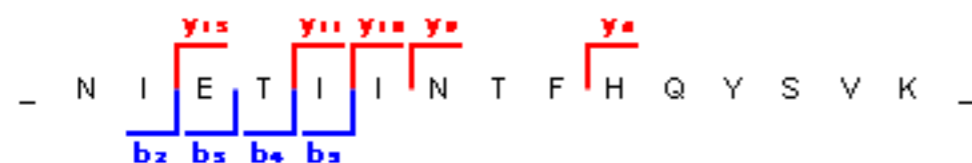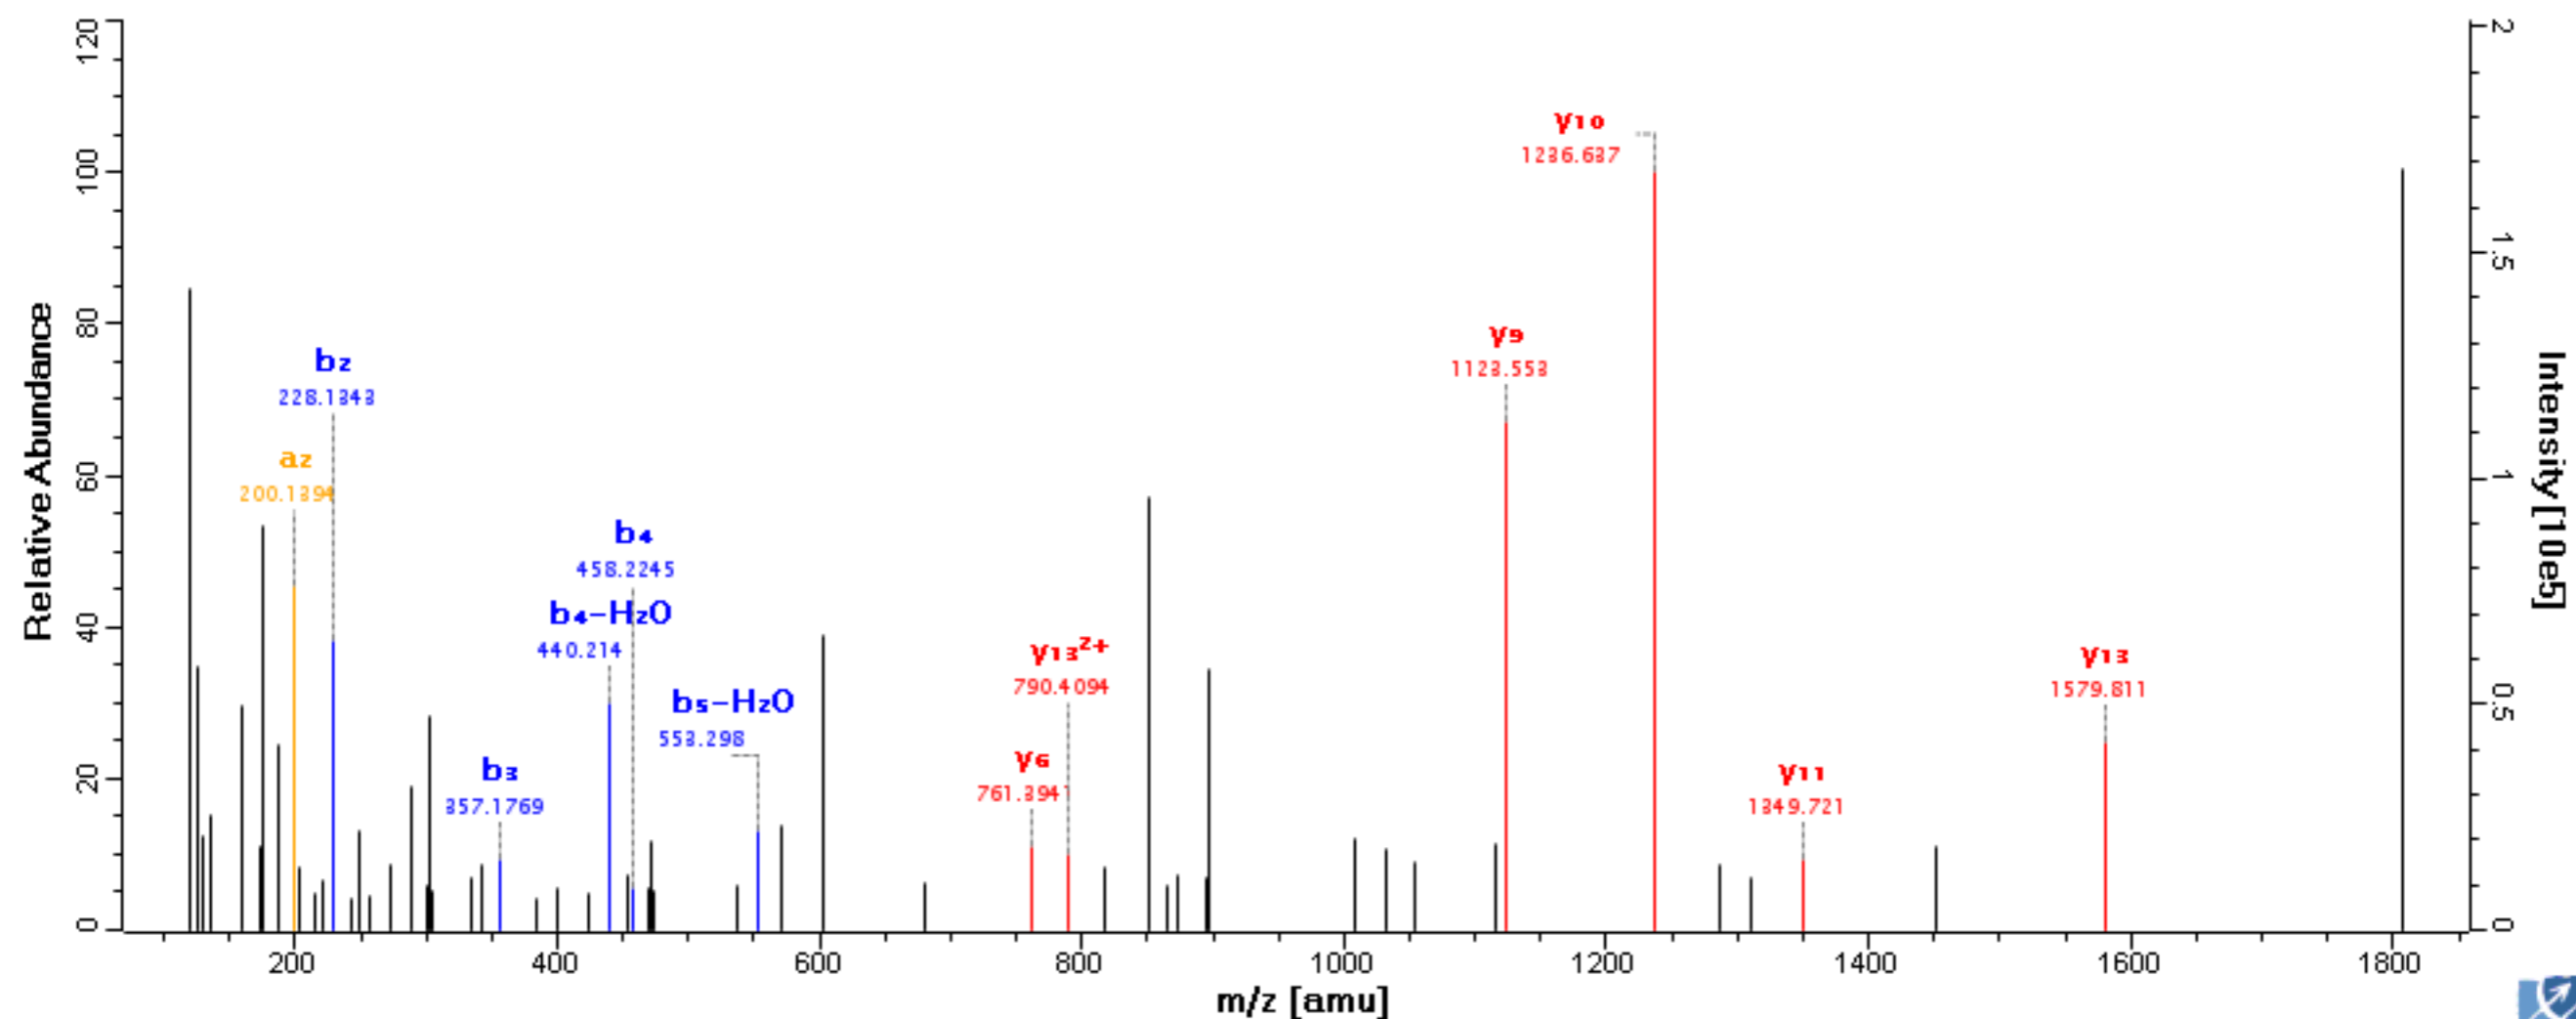

Source: Bibo\_20130531\_RM\_MSC07627\_1\_3  
 Scannumber: 44879  
 Protein: GCP16; GOLGA7; HDCKB03P; HSPC041; Q7Z5G4  
 Peptide Score: 73.93  
 Method: FTMS; HCD; 1

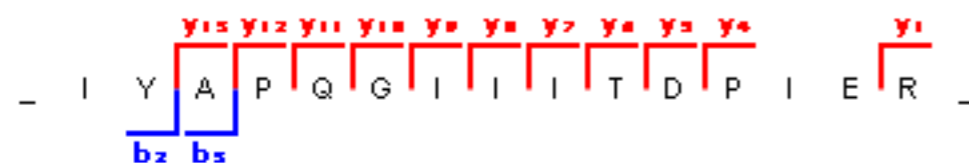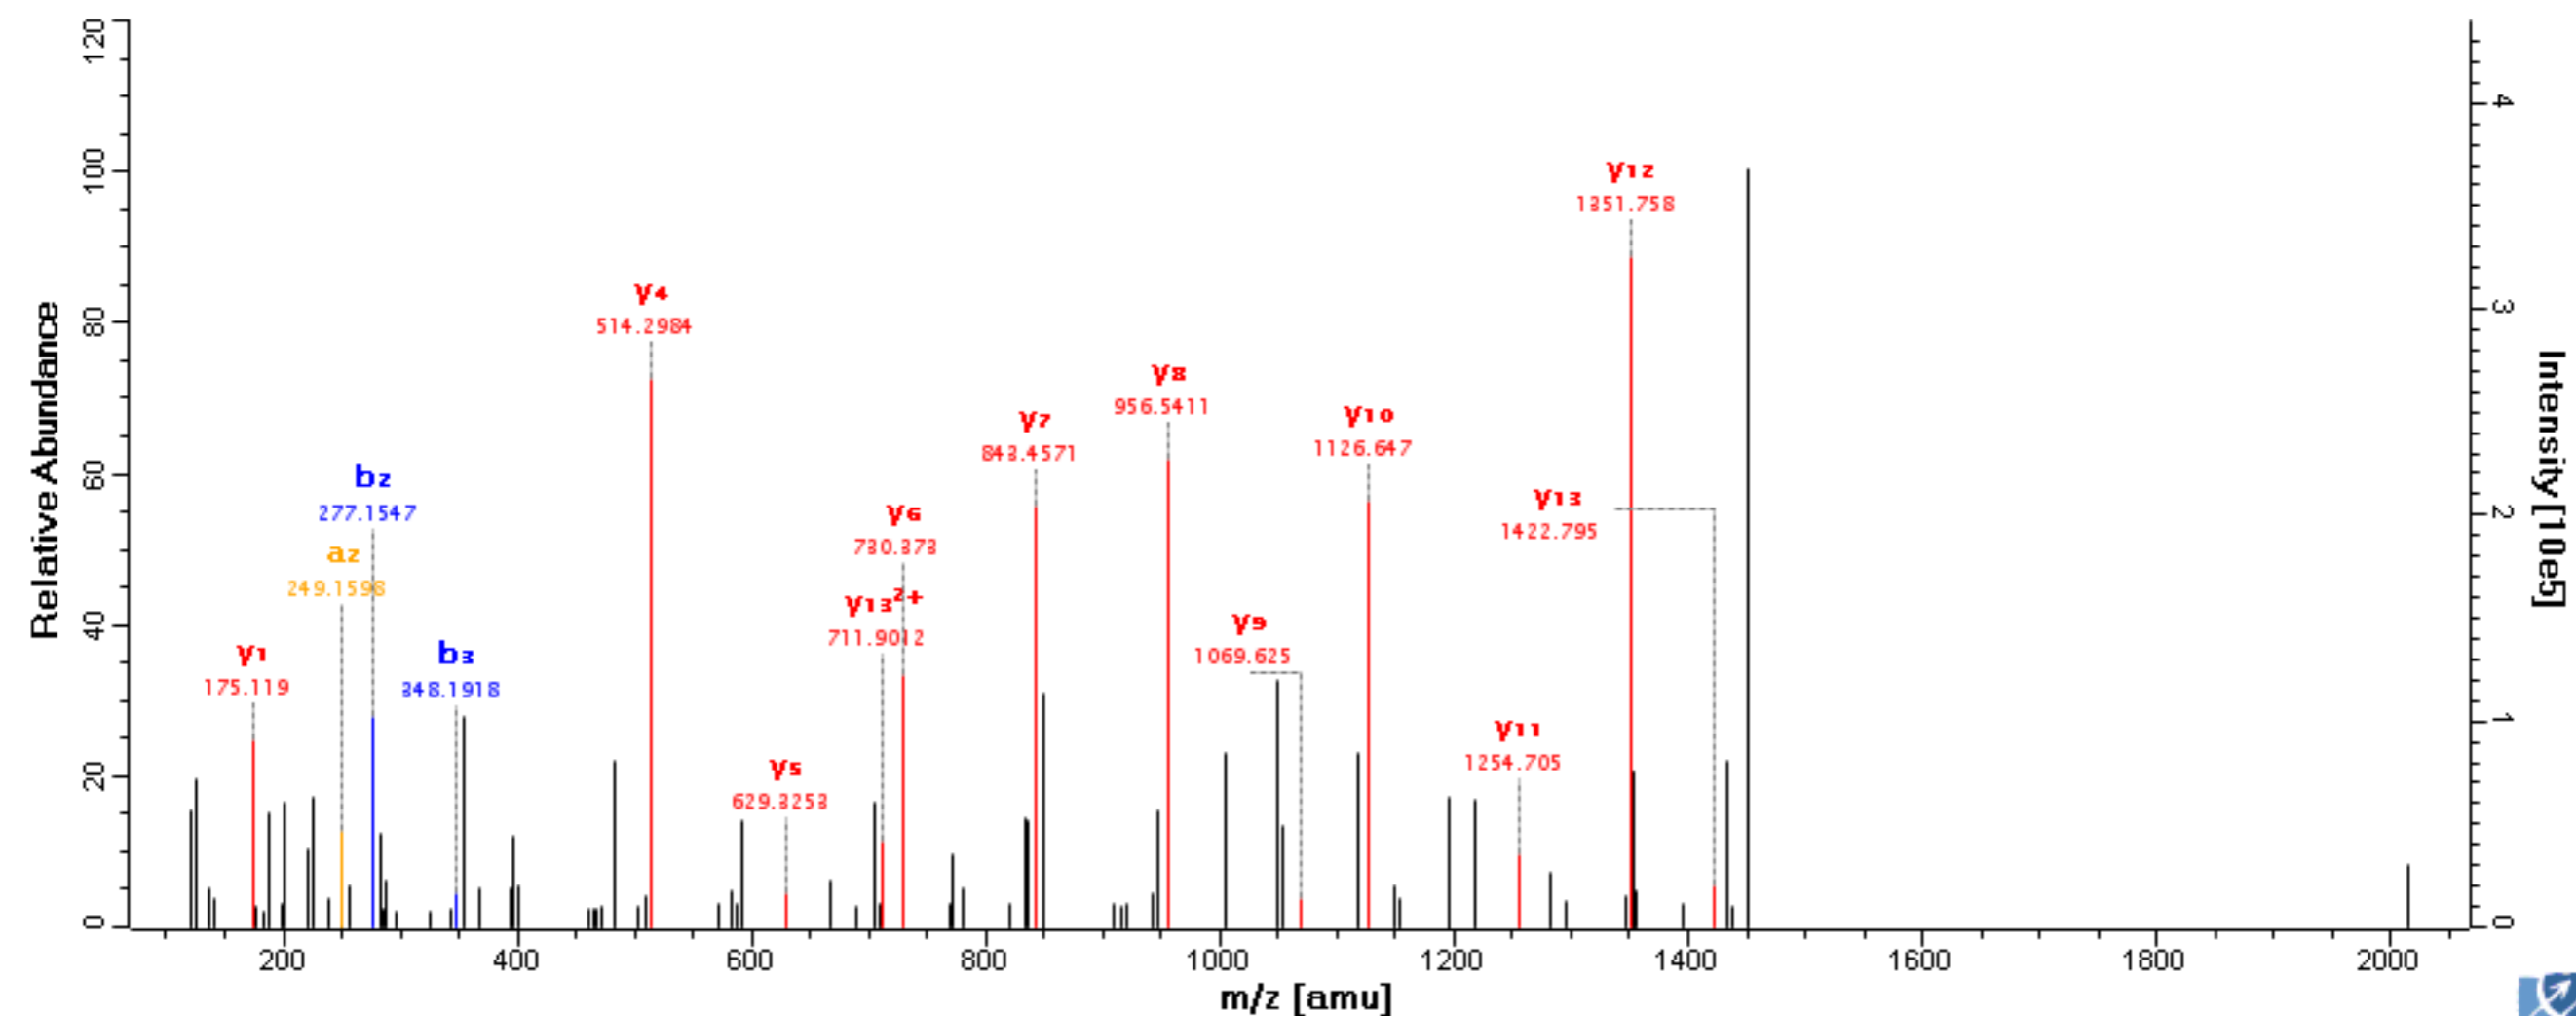

Source: Bibo\_20130531\_RM\_MSC07627\_1\_3  
 Scannumber: 44974  
 Protein: AFG1; LACE1; LACE1; RP3-479019.1-006; LACE1; RP3-479019.1-007; Q8WV93; A6PVM0; A6ZJA2  
 Peptide Score: 5.78  
 Method: FTMS; HCD; 1

\_ K V M<sup>ox</sup> E V<sup>ox</sup> Y<sup>ox</sup> A Y<sup>ox</sup> F M<sup>ox</sup> D M<sup>ox</sup> V M<sup>ox</sup> K<sup>gl</sup> \_  
           b<sub>2</sub> b<sub>3</sub> b<sub>4</sub>

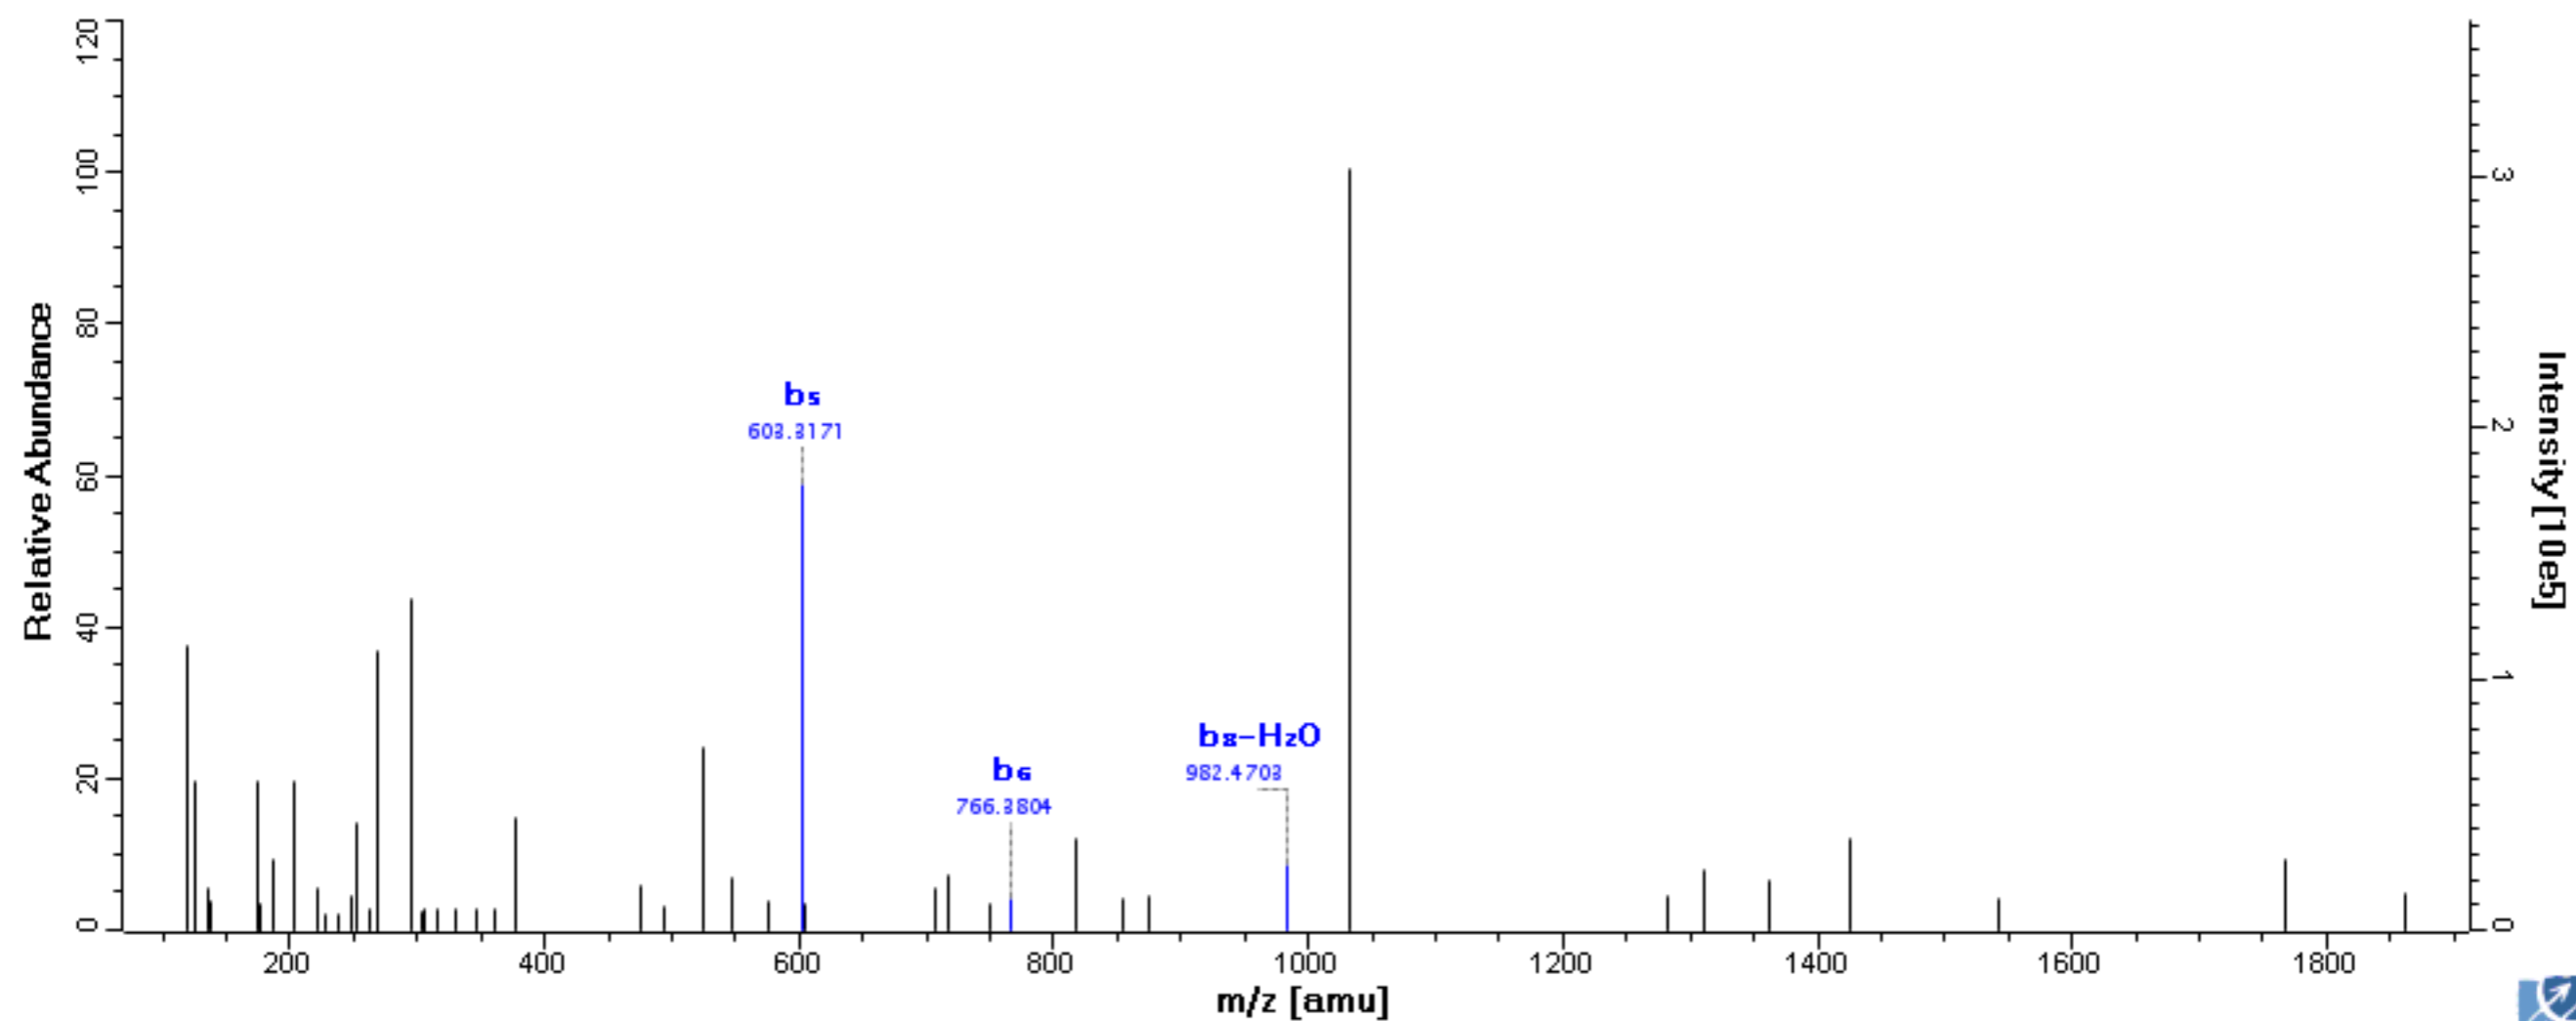

Source: Bibo\_20130531\_RM\_MSC07627\_1\_3  
 Scannumber: 47668  
 Protein: SAKS1; UBXN1; SAKS1; UBXN1; hCG\_1818009; LOC51035; UBXN1; Q04323-2; Q04323; Q04323-1; Q04323; E9PRQ7; B4DNC6; E9PJ81; Q05BV2; B4EOP8  
 Peptide Score: 84.14  
 Method: FTMS; HCD; 1

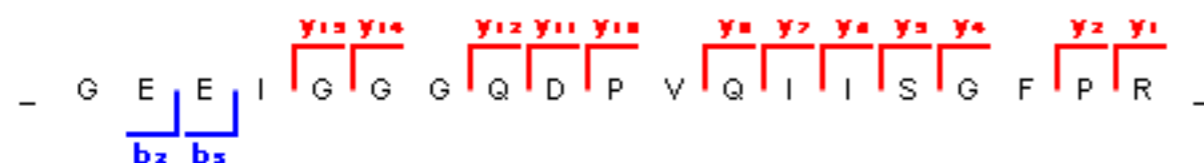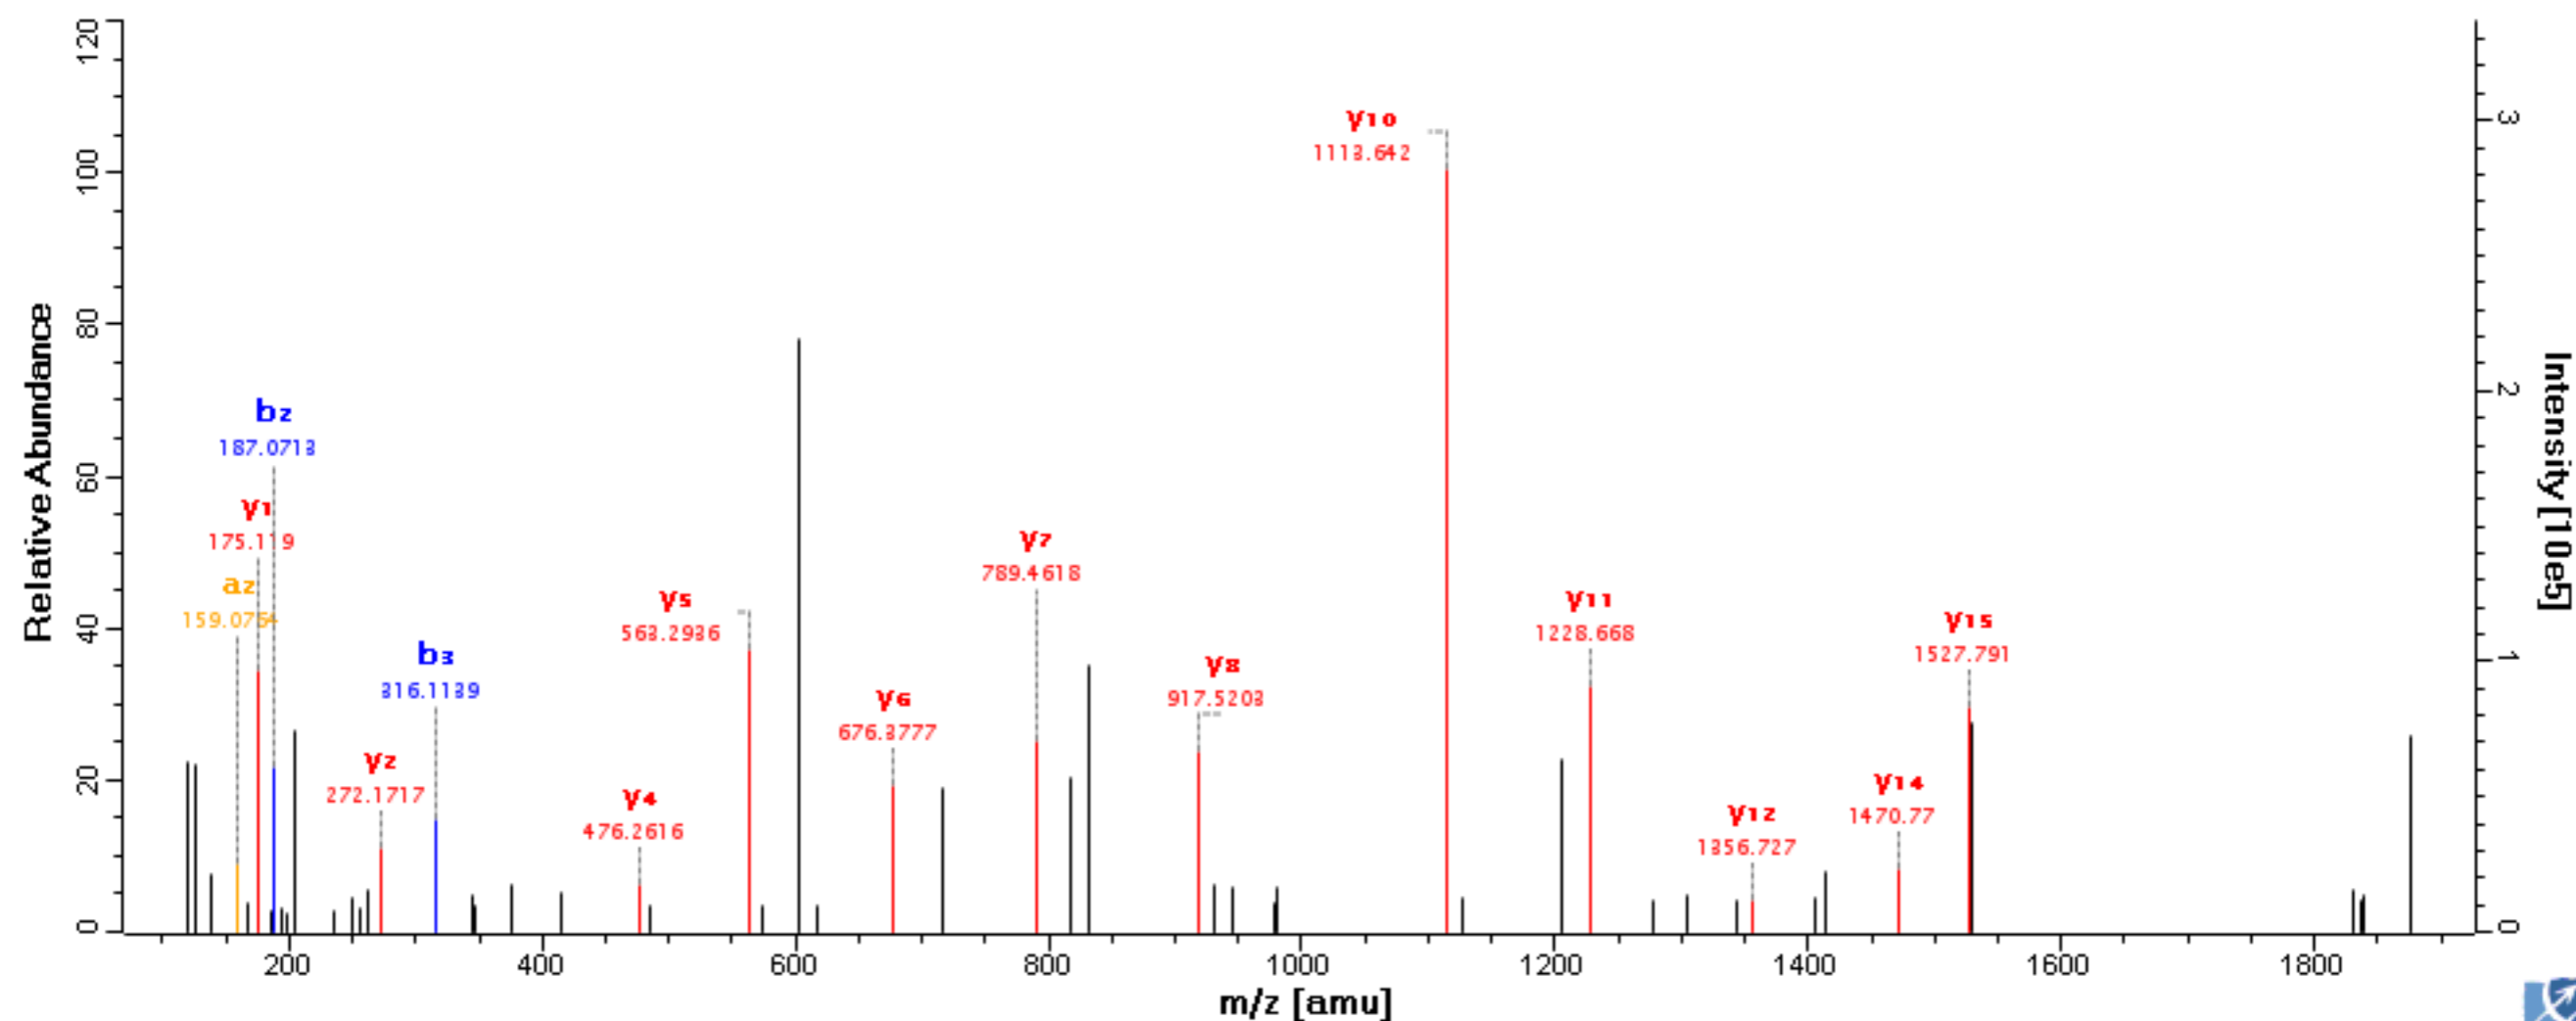

Source: Bibo\_20130531\_RM\_MSC07627\_1\_3  
 Scannumber: 47940  
 Protein: SAKS1; UBXN1; SAKS1; UBXN1; hCG\_1818009; LOC51035; UBXN1; Q04323-2; Q04323; Q04323-1; Q04323; E9PRQ7; B4DNC6; E9PJ81; Q05BV2; B4EOP8  
 Peptide Score: 104.45  
 Method: FTMS; HCD; 1

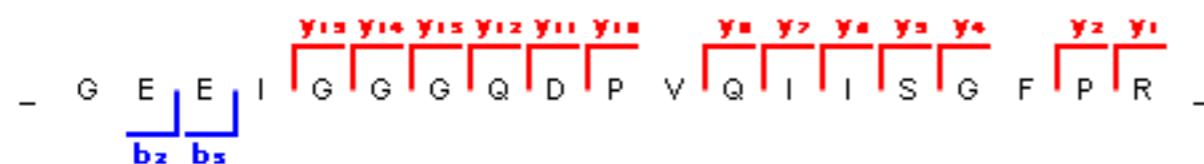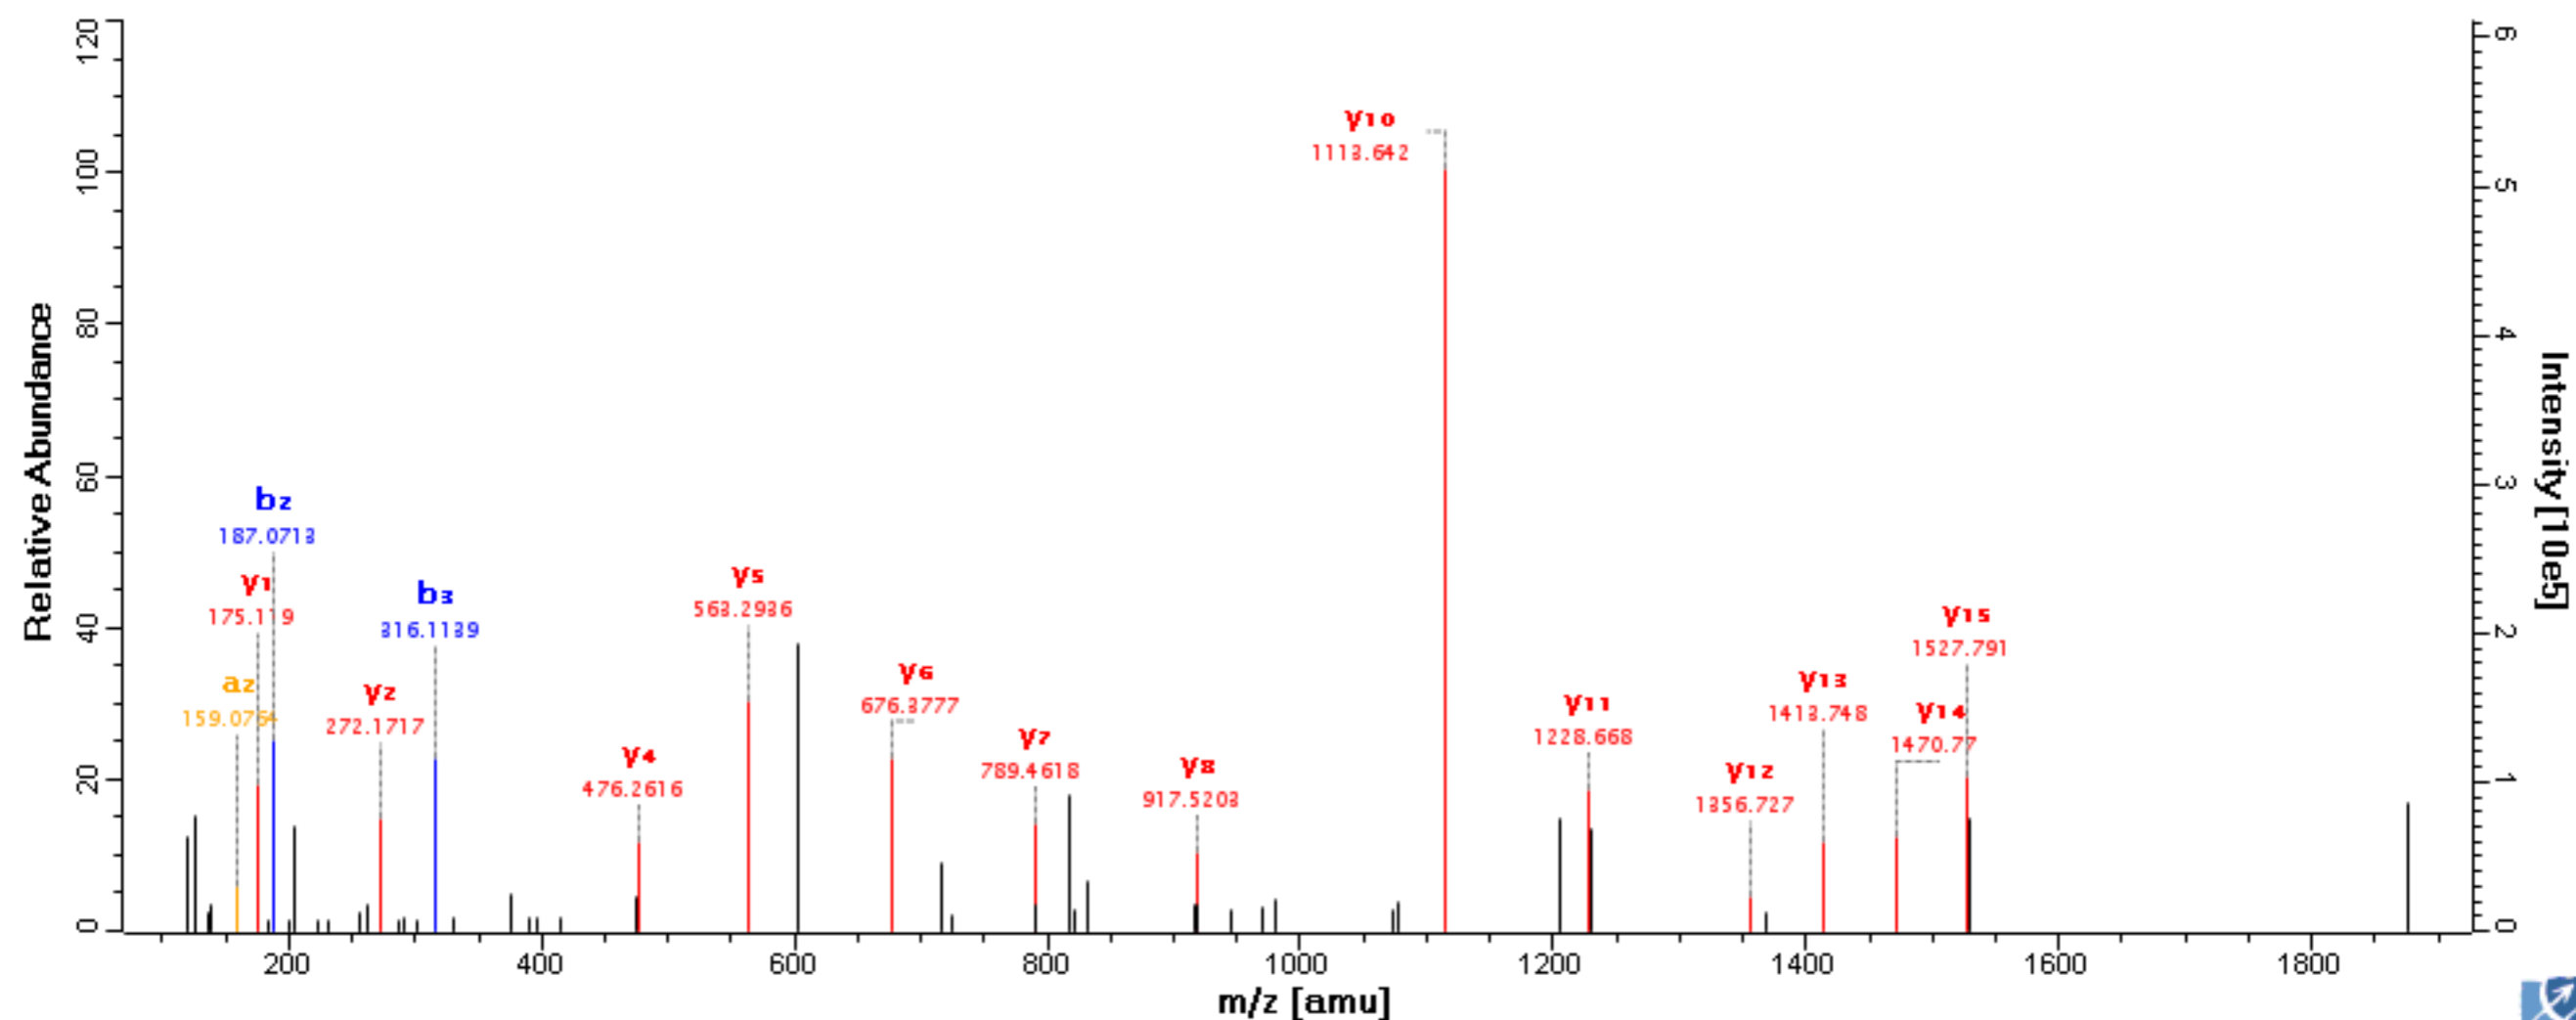

Source: Bibo\_20130531\_RM\_MSC07627\_1\_3  
 Scannumber: 51008  
 Protein: SRP14; P37108  
 Peptide Score: 116.01  
 Method: FTMS; HCD; 1

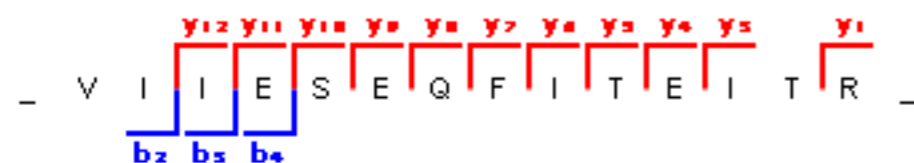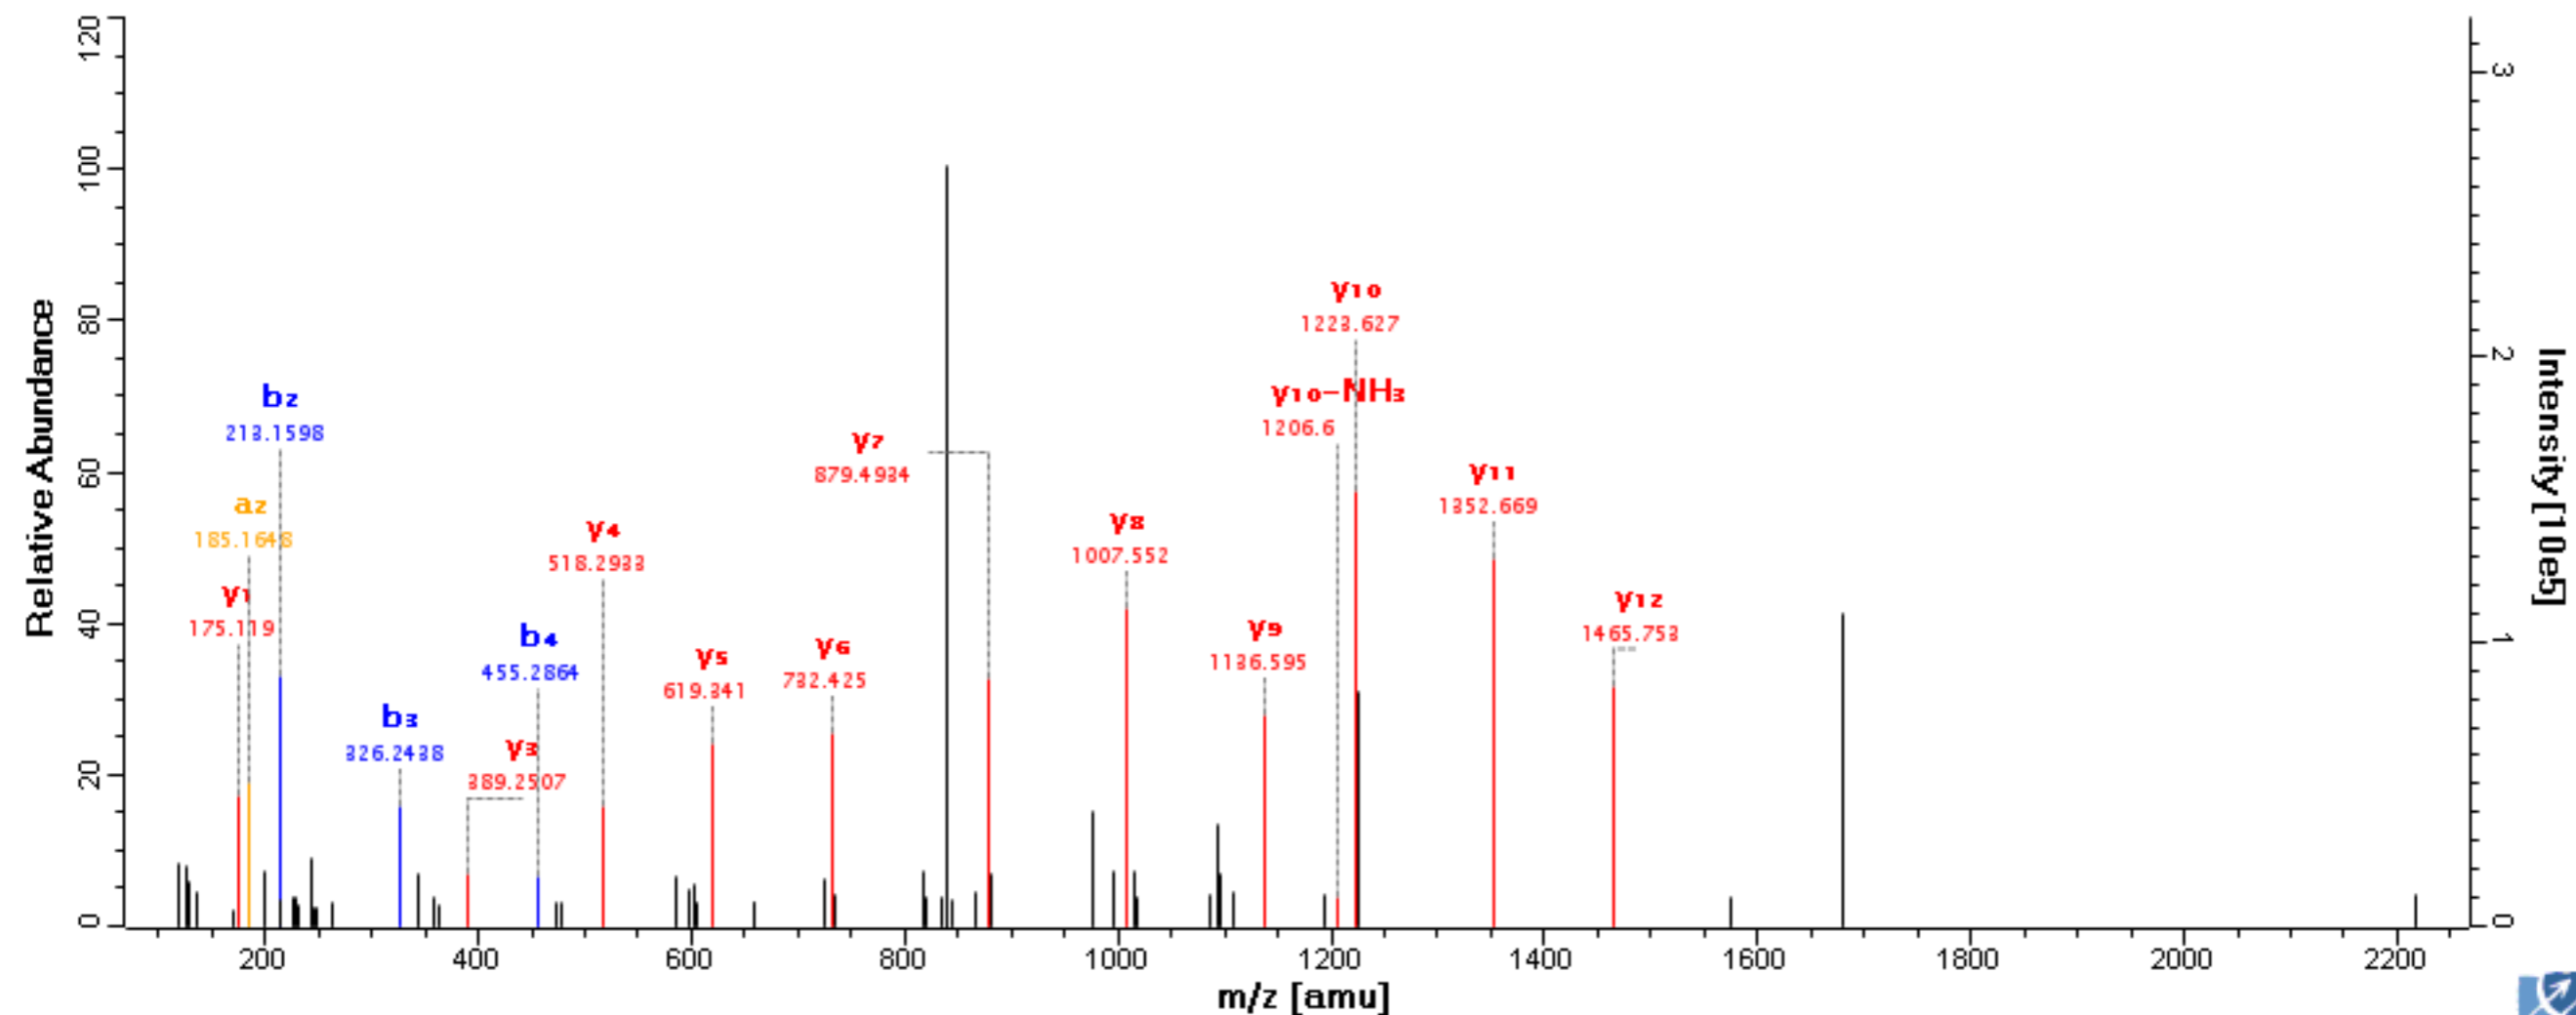

Source: Bibo\_20130531\_RM\_MSC07627\_1\_3  
 Scannumber: 53522  
 Protein: NPM; NPM1; NPM; NPM1; NPM1; P06748-1; P06748; A4ZU86; Q9BT19; P06748-2; P06748; Q9BYG9; Q9NX34; E5RI98  
 Peptide Score: 89.85  
 Method: FTMS; HCD; 1

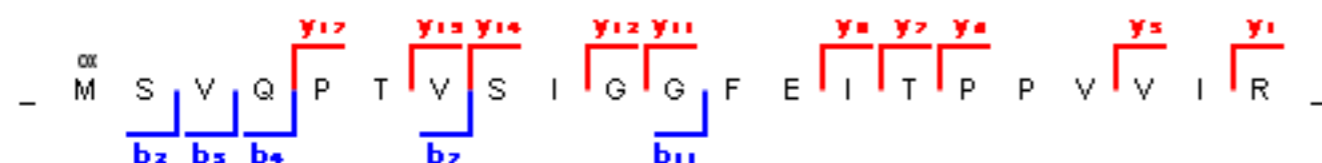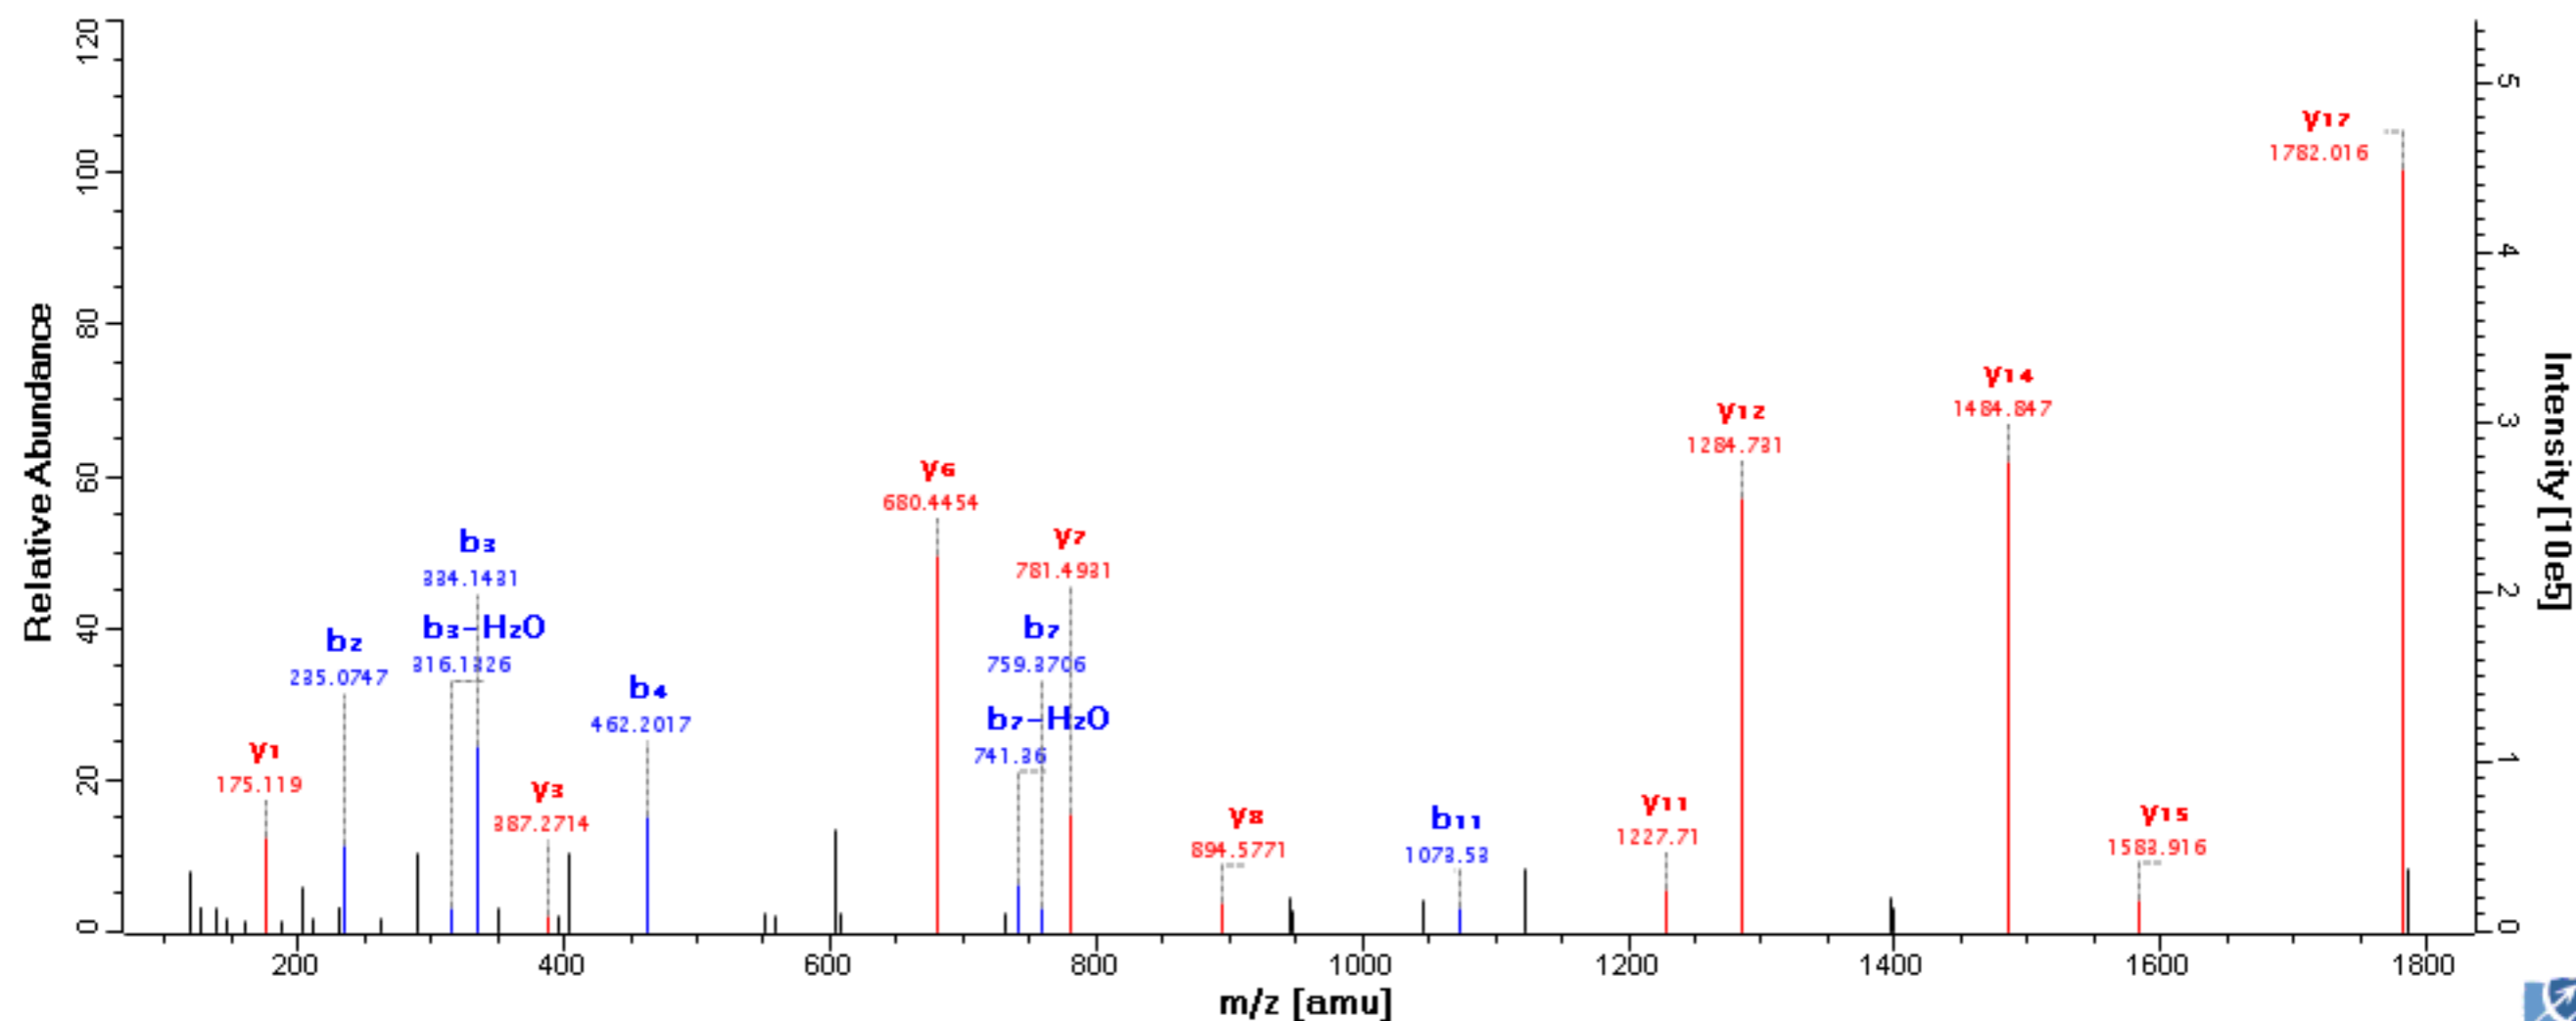

Source: Bibo\_20130531\_RM\_MSC07627\_4  
 Scannumber: 12119  
 Protein: CRYBG3; CRYBG3; Q68DQ2-1; Q68DQ2; Q68DQ2-2; Q68DQ2; C9J5N2; C9J659  
 Peptide Score: 97.42  
 Method: FTMS; HCD; 1

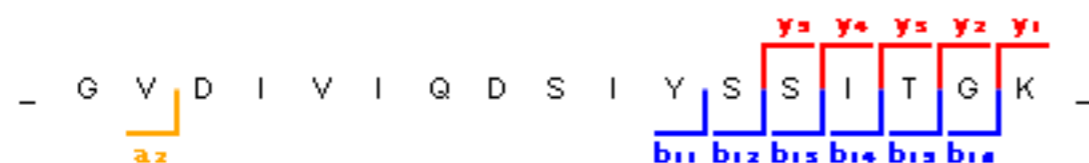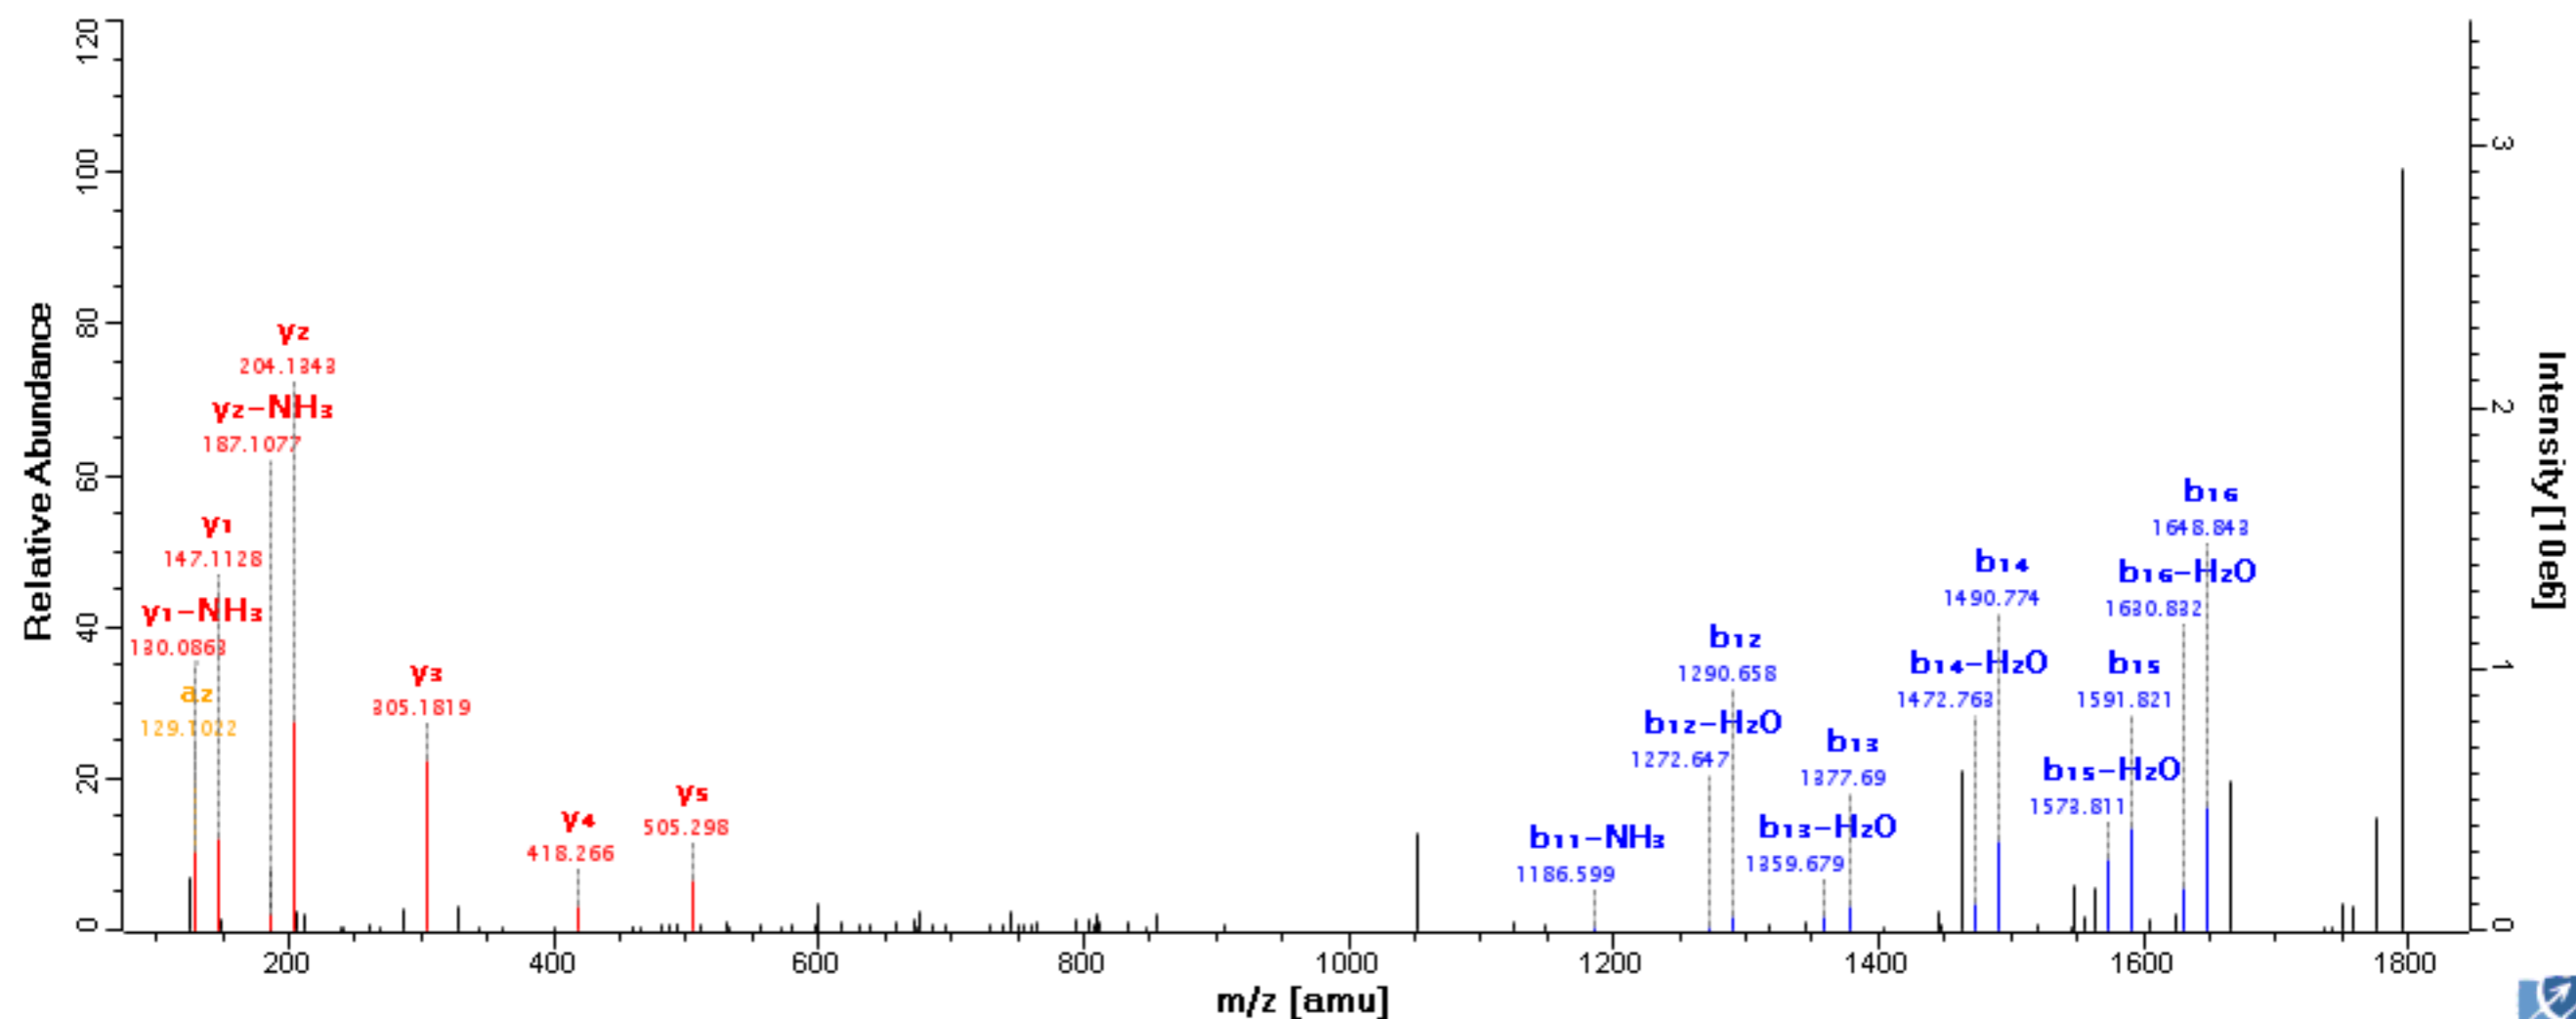

Source: Bibo\_20130531\_RM\_MSC07627\_4  
 Scannumber: 16874  
 Protein: RBM4; RBM4A; Q9BWF3-2; Q9BWF3  
 Peptide Score: 99.8  
 Method: FTMS; HCD; 1

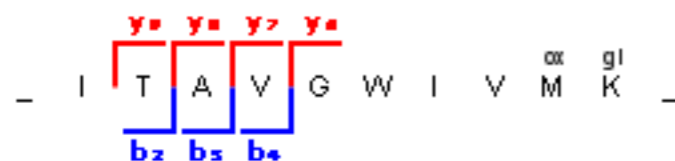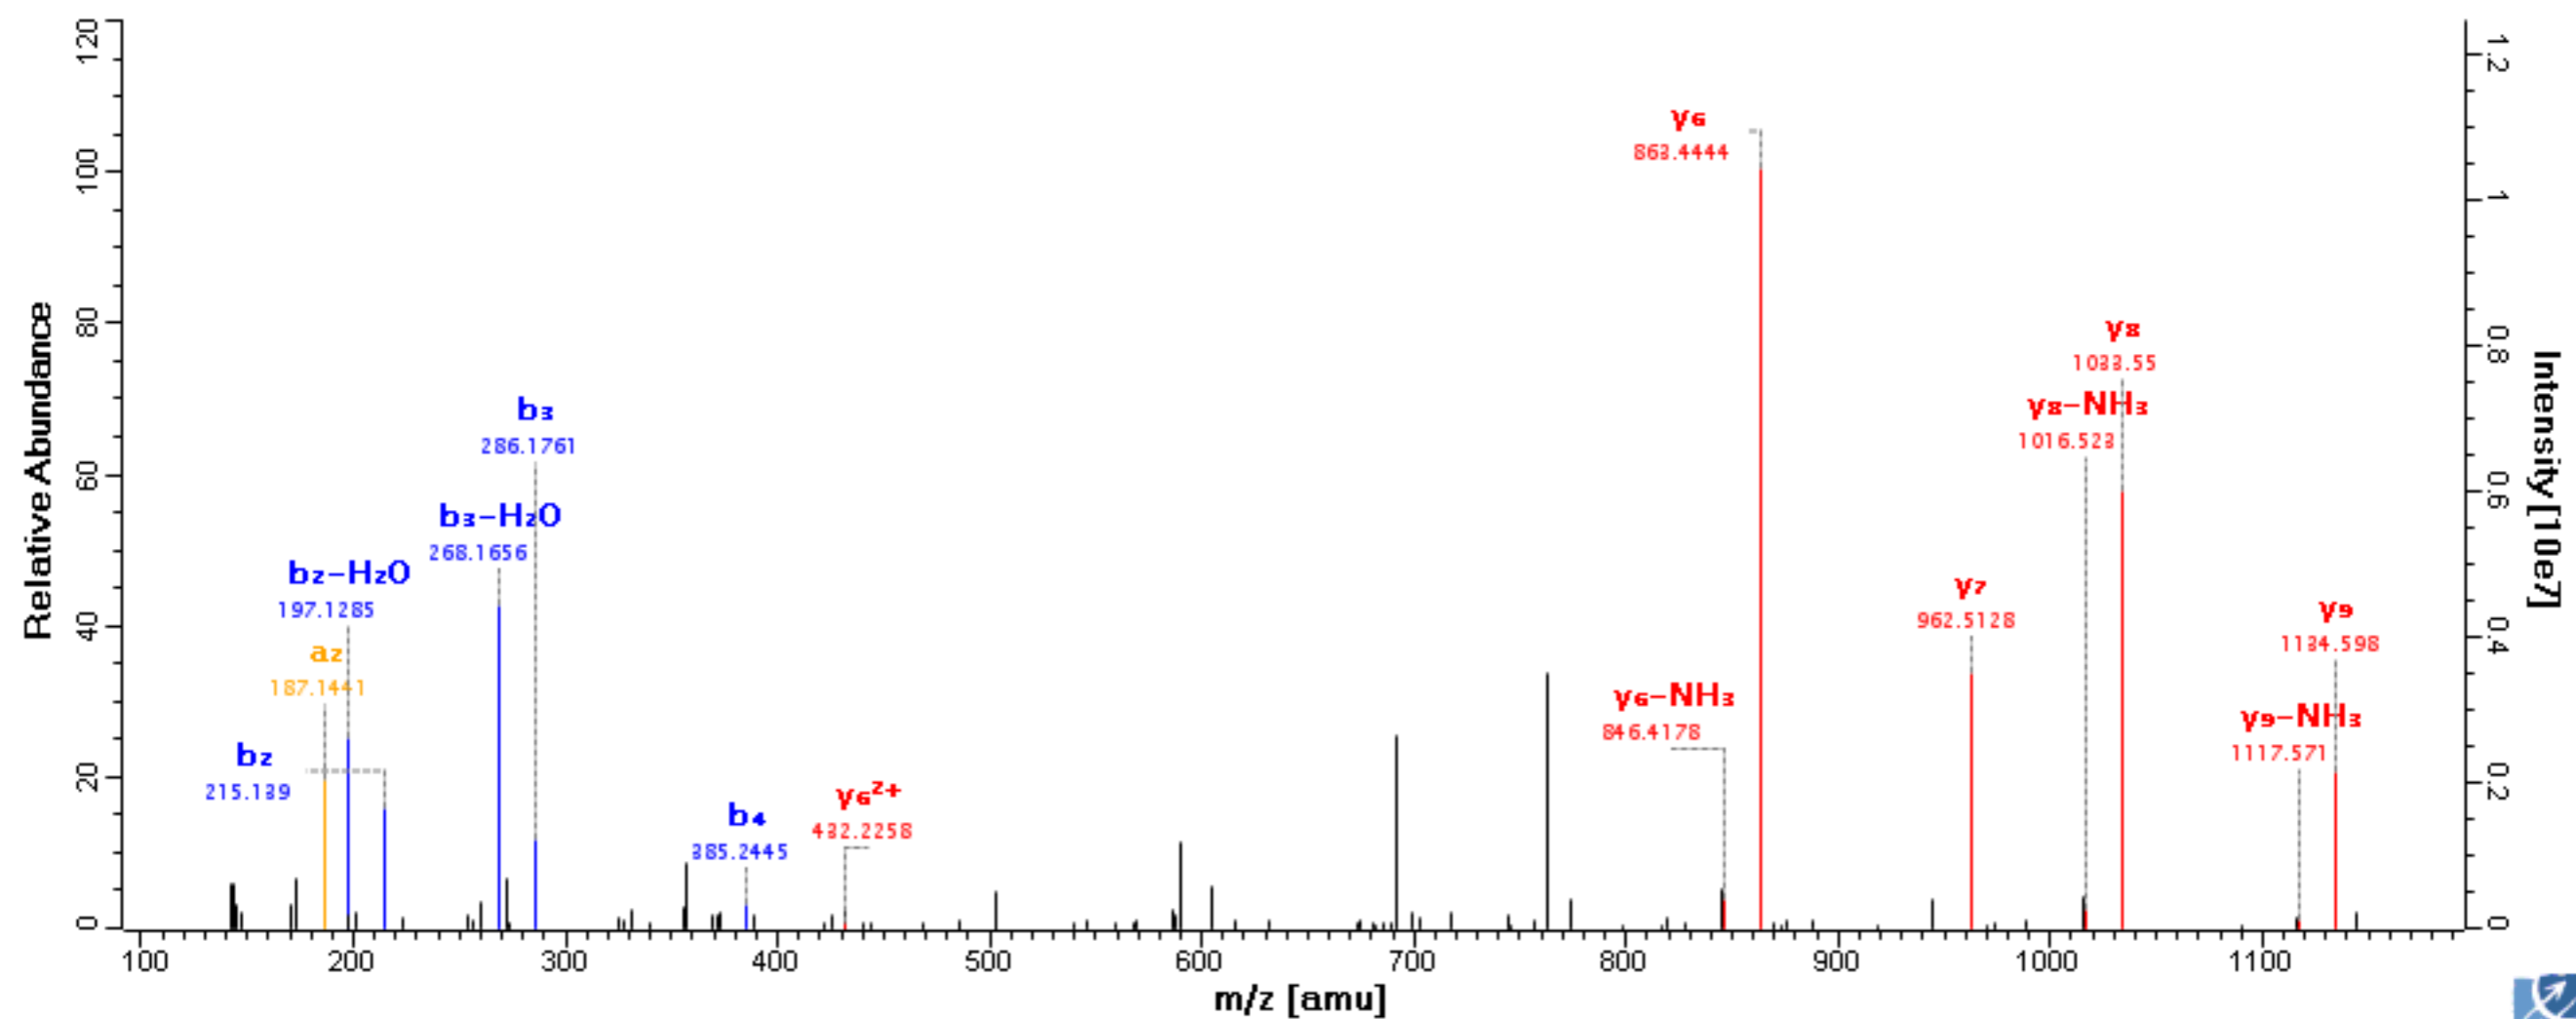

Source: Bibo\_20130531\_RM\_MSC07627\_4

Scannumber: 35218

Protein: PRSS1; TRP1; TRY1; TRYP1; PRSS3; PRSS2; TRY2; TRYP2; PRSS1; hCG\_1770551; tcag7.1285; TRY8; trypsinogen 8; PRSS1; TRP1; TRY1; TRYP1; T6; TRY6; PRSS1; E7EQ64; Q7Z5F3; P07477;

Peptide Score: 79.01

Method: FTMS; HCD; 1

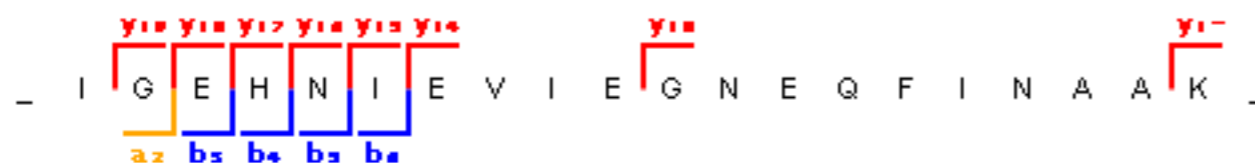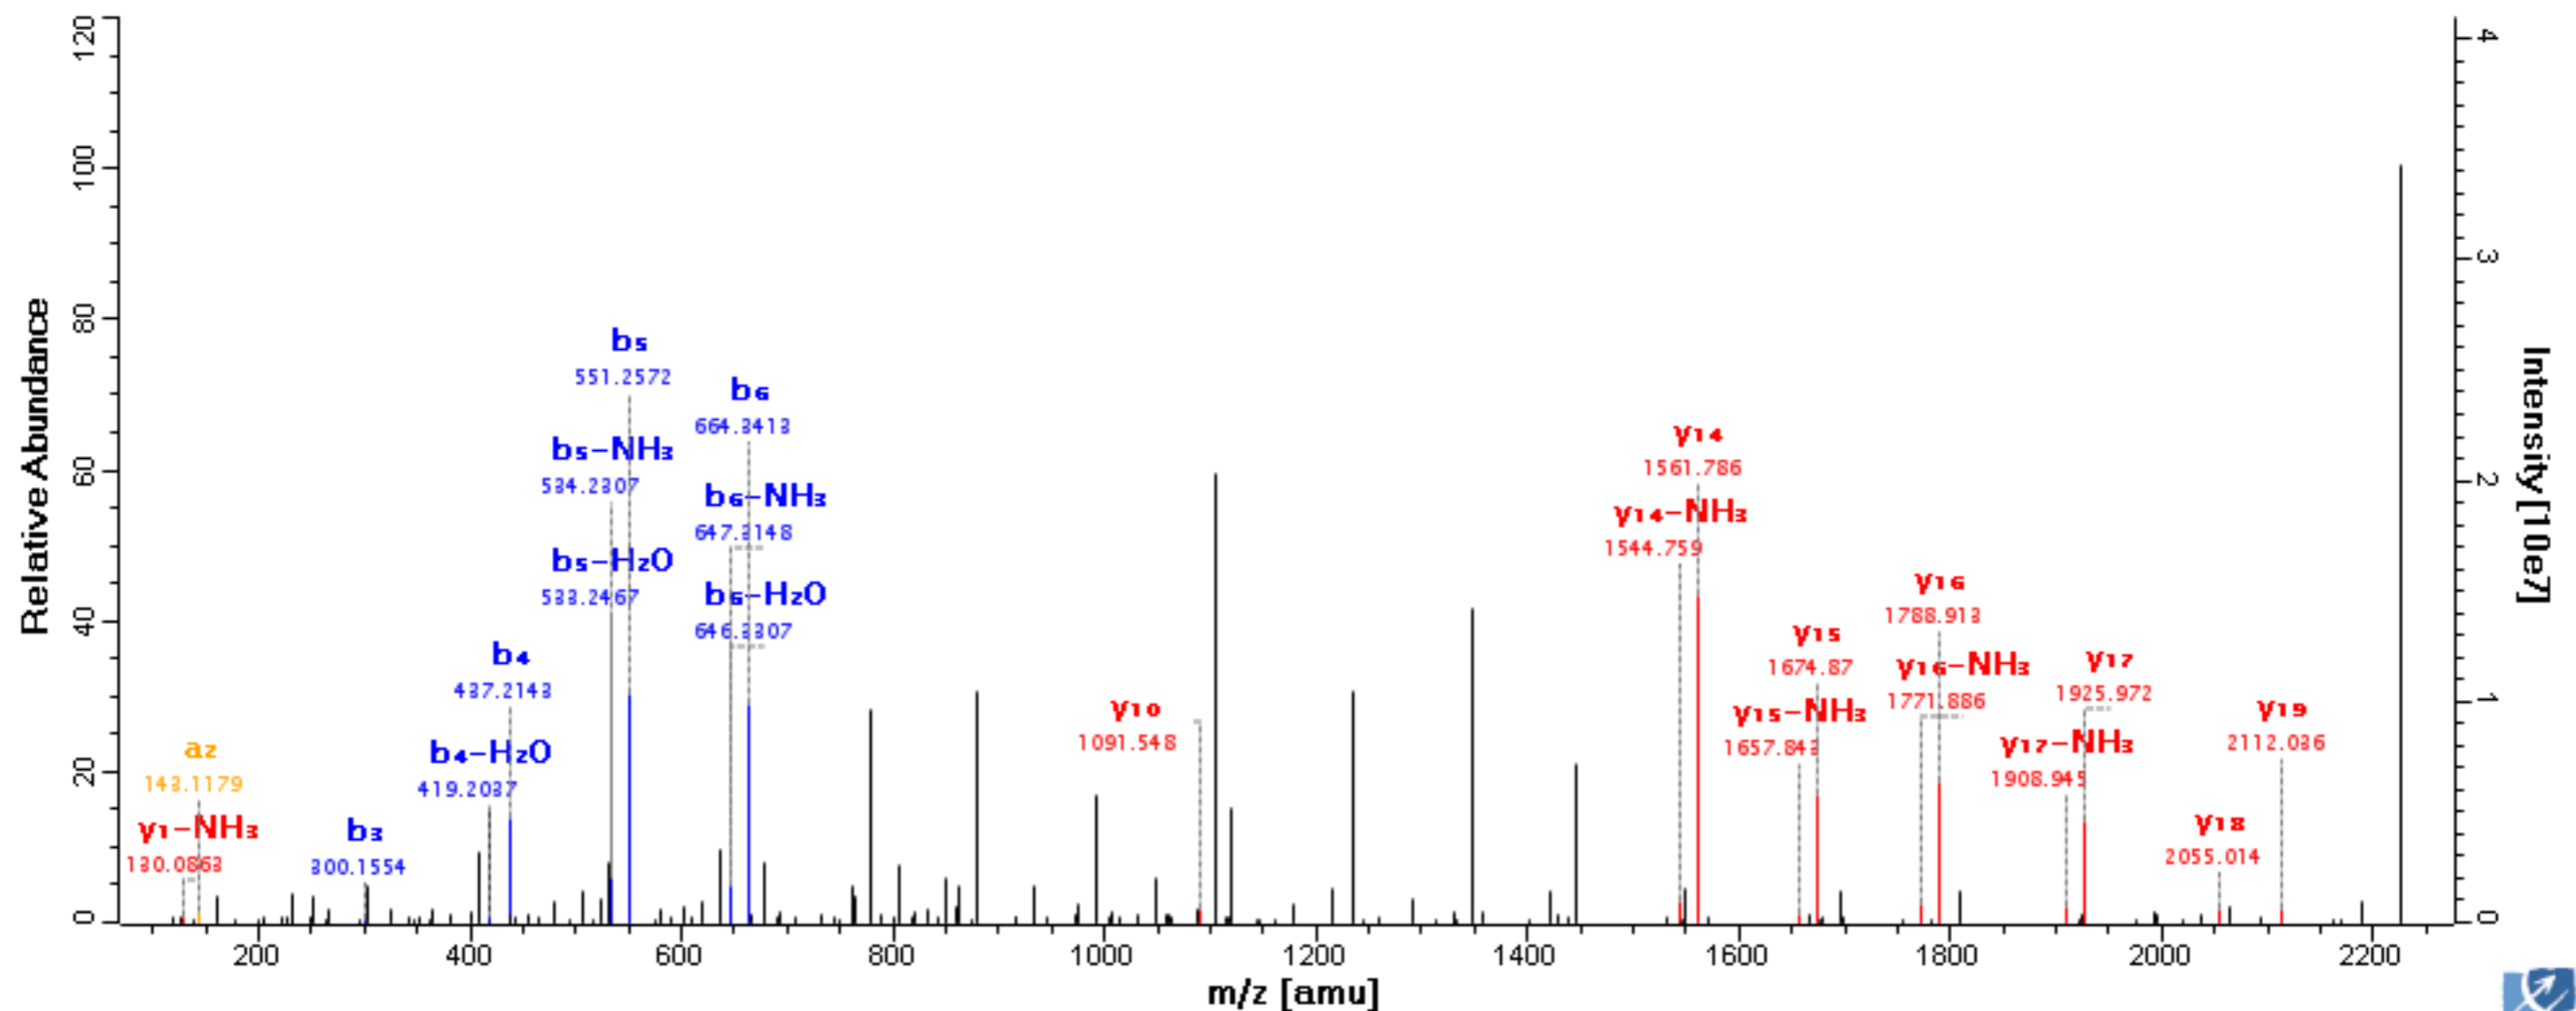

Source: Bibo\_20130531\_RM\_MSC07627\_4  
Scannumber: 58458  
Protein: CEP4L; TSGA10; TSGA10; Q9BZW7; B2R8F9; E7EPC1; B7Z925; B8ZZZ9  
Peptide Score: 4.35  
Method: FTMS; HCD; 1

\_ M E Q M S N M T I M <sup>γ\*</sup><sub>gl</sub>K E T I S <sup>γ\*</sup>T V E K \_

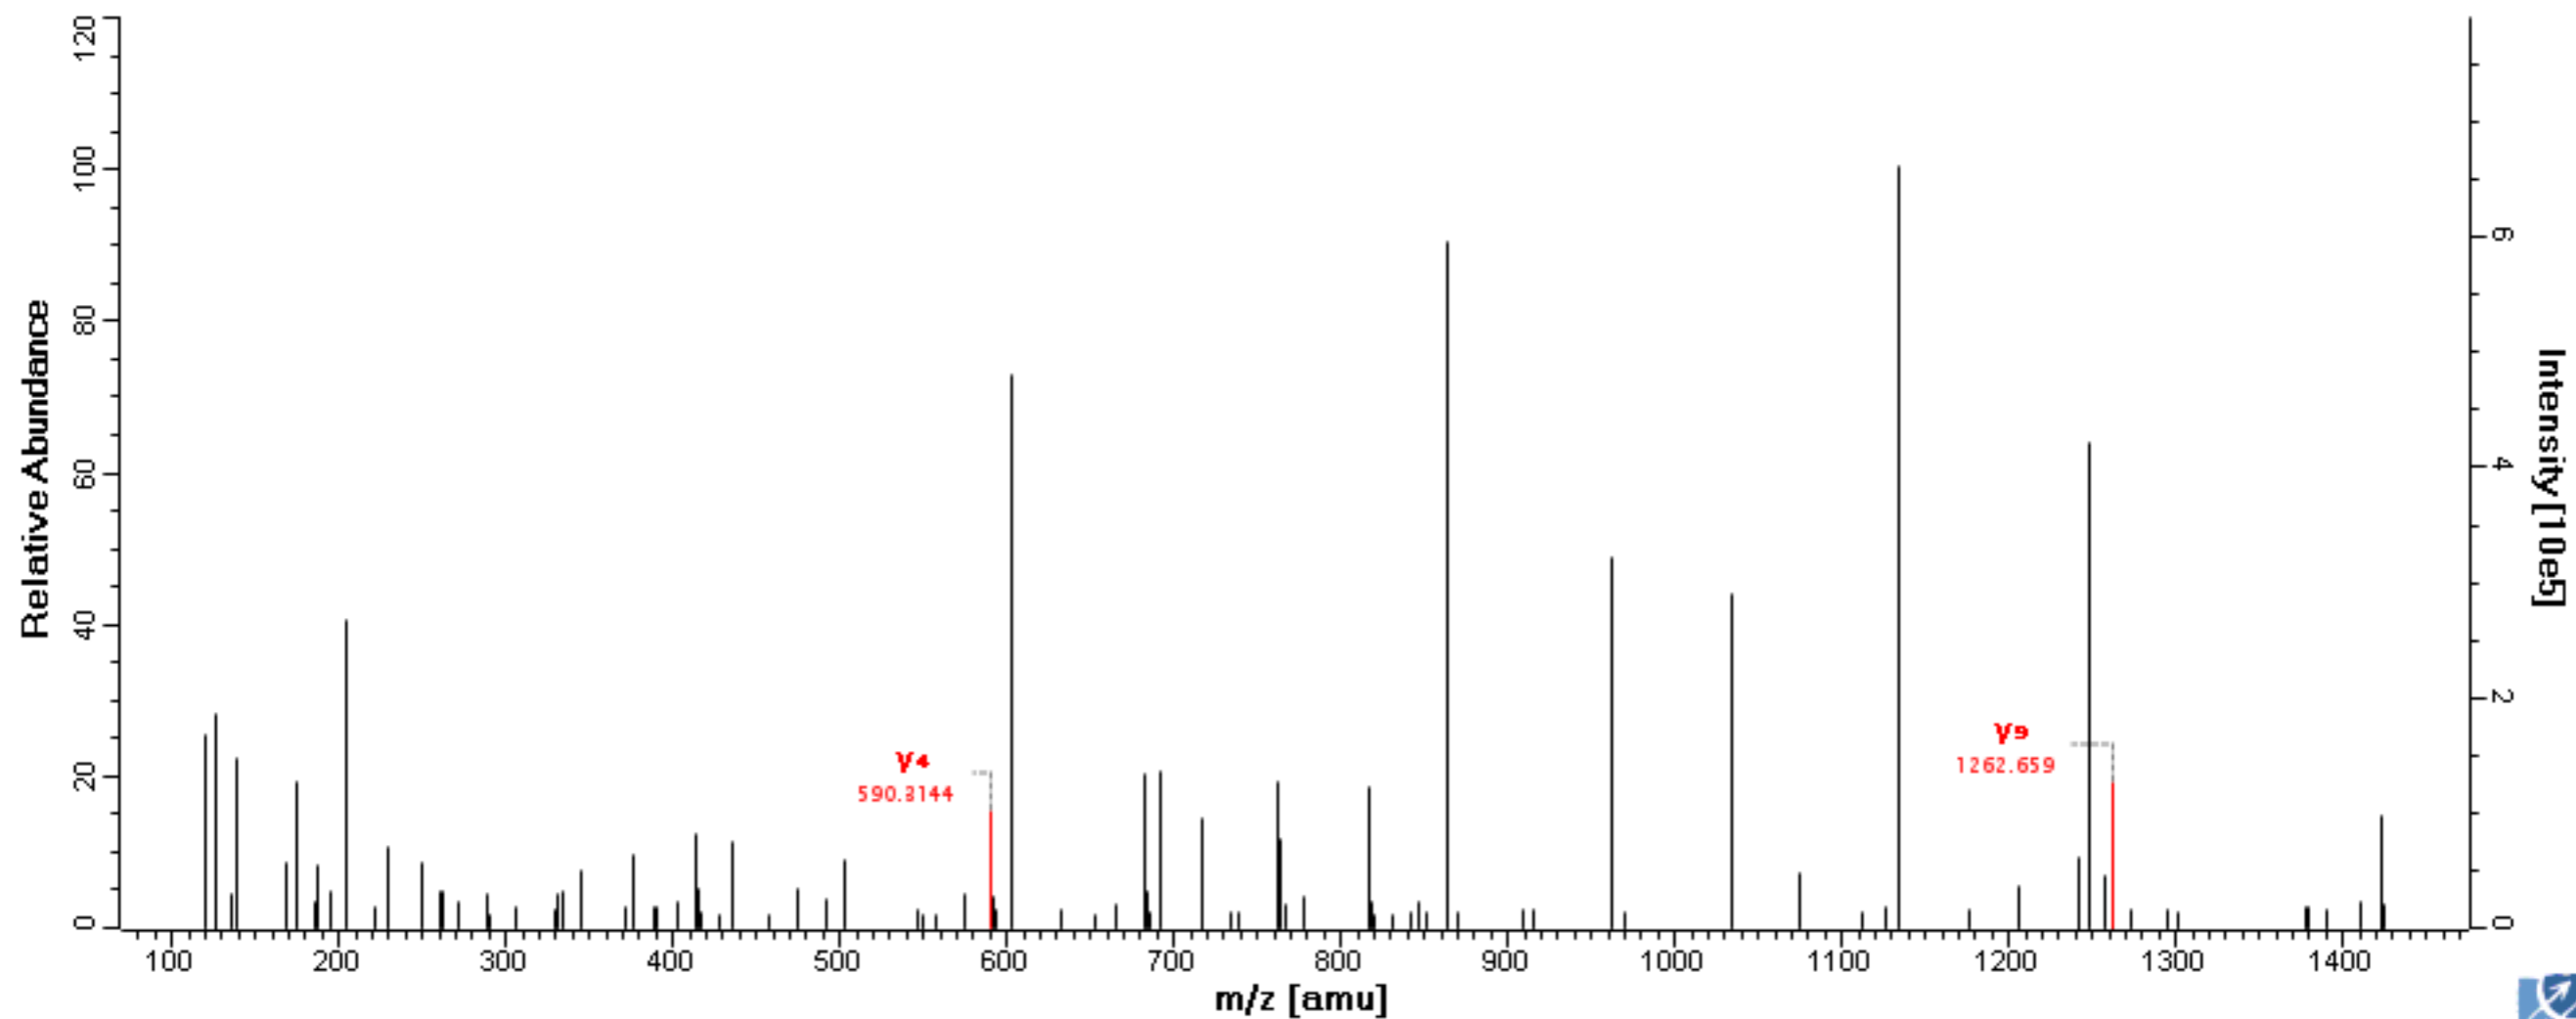

Source: Bibo\_20130531\_RM\_MSC07628\_1\_3  
 Scannumber: 2799  
 Protein: HNRNPA2B1; HNRPA2B1; HNRNPA2B1; HNRPA2B1; HNRNPA2B1; P22626-1; P22626; P22626-2; P22626; B8ZZ37  
 Peptide Score: 111.65  
 Method: FTMS; HCD; 1

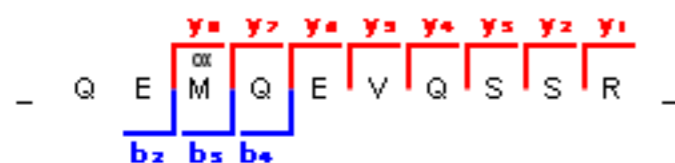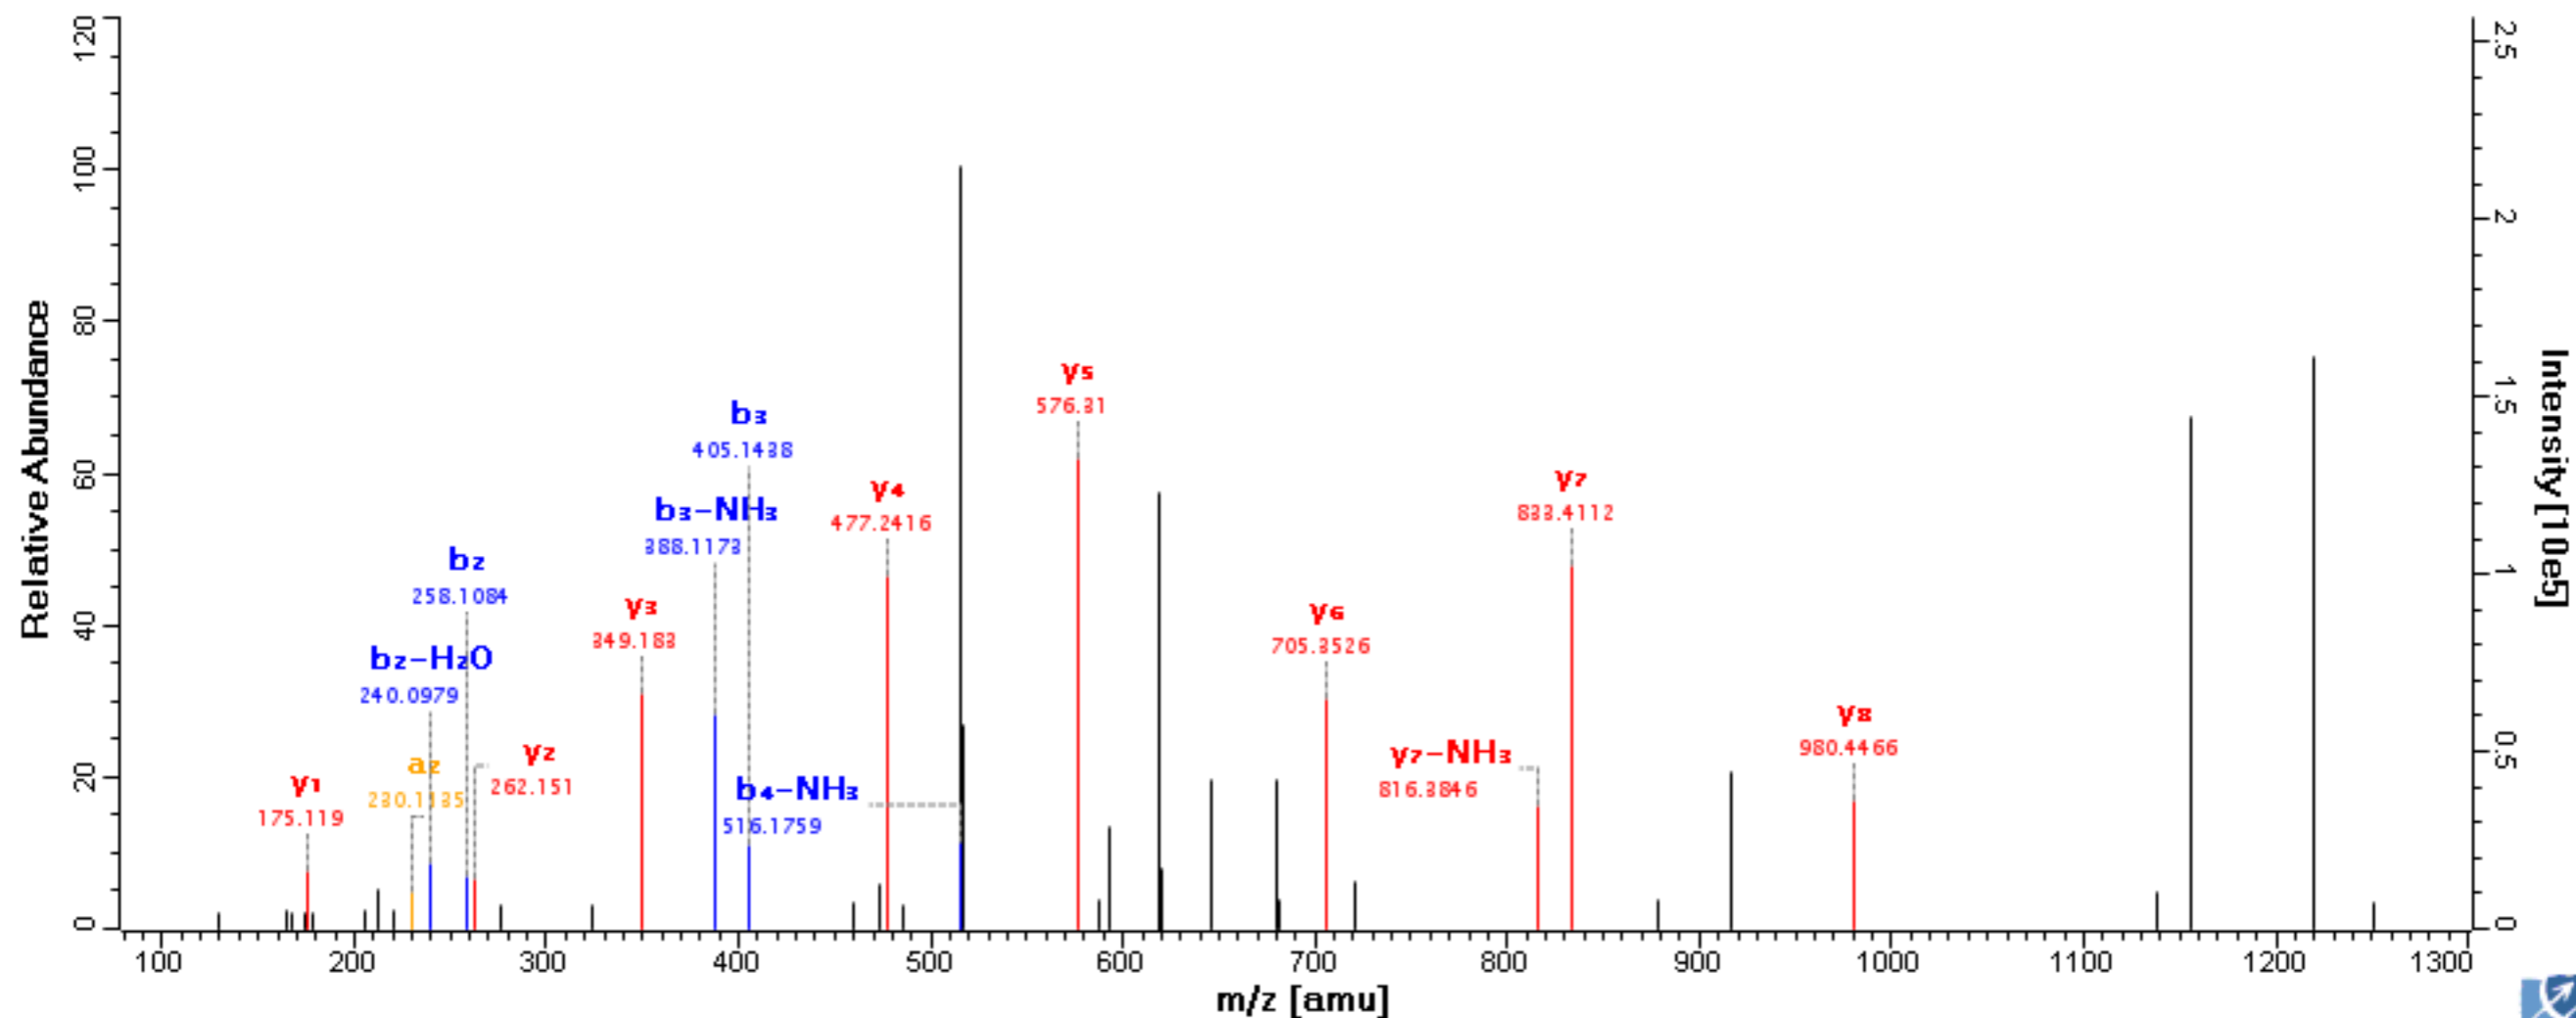

Source: Bibo\_20130531\_RM\_MSC07628\_1\_3  
 Scannumber: 2857  
 Protein: HC8; PSC8; PSMA3; HC8; PSC8; PSMA3; P25788-1; P25788; Q6IB71; P25788-2; P25788  
 Peptide Score: 85.06  
 Method: FTMS; HCD; 1

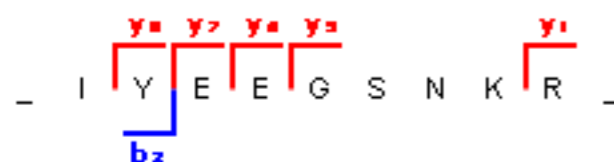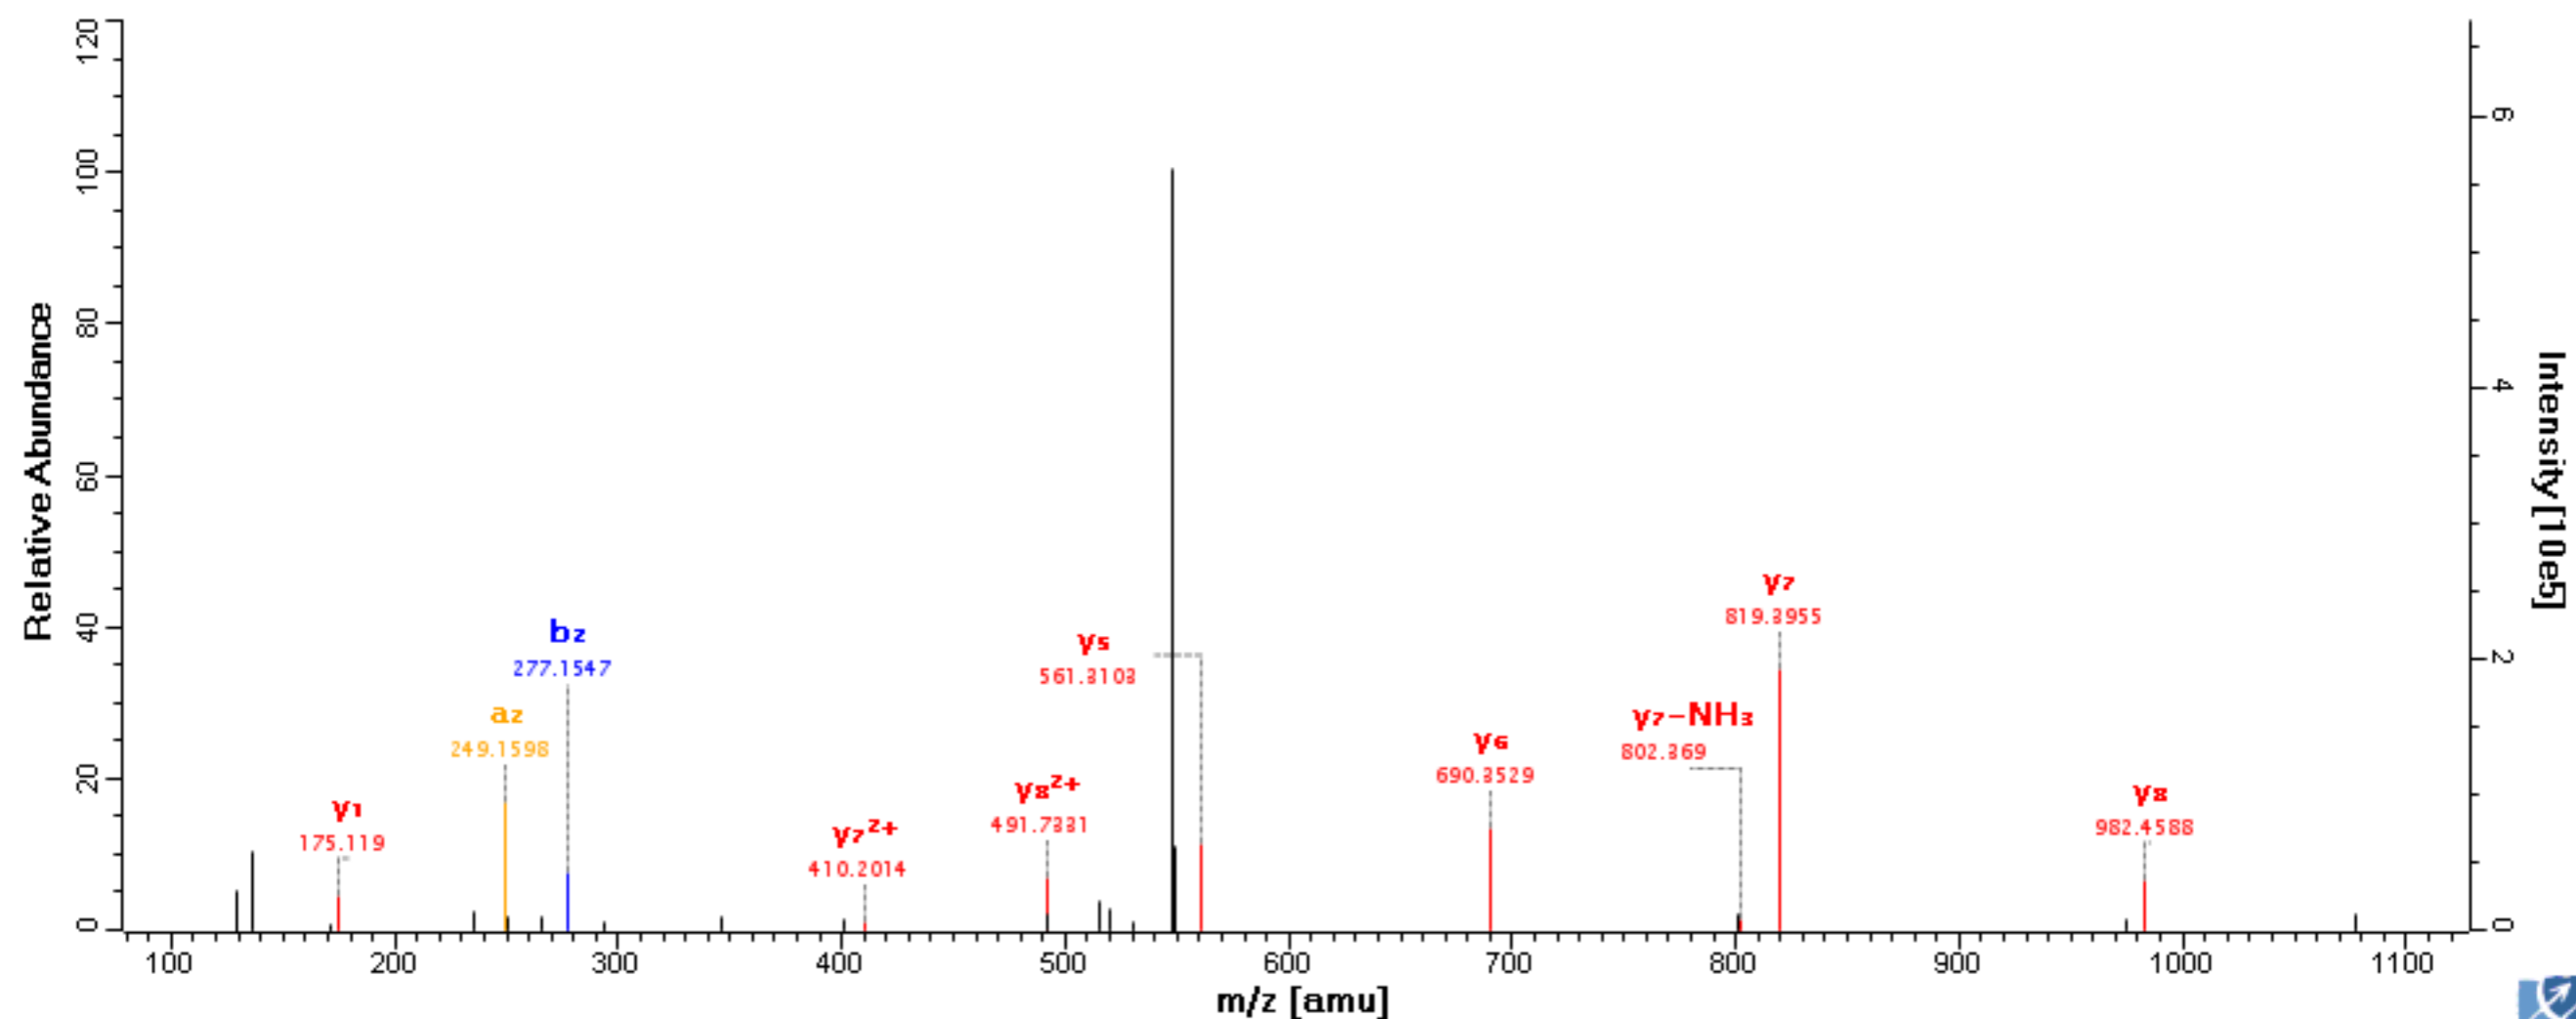

Source: Bibo\_20130531\_RM\_MSC07628\_1\_3  
 Scannumber: 3110  
 Protein: RAP80; RXRIP110; UIMC1; RAP80; RXRIP110; UIMC1; RAP80; RXRIP110; UIMC1; Q96RL1-1; Q96RL1; Q96RL1-2; Q96RL1; C9JR12; F2Z2T8; Q96RL1-3; Q96RL1; D6RCQ3; D6RC40  
 Peptide Score: 123.29  
 Method: FTMS; HCD; 1

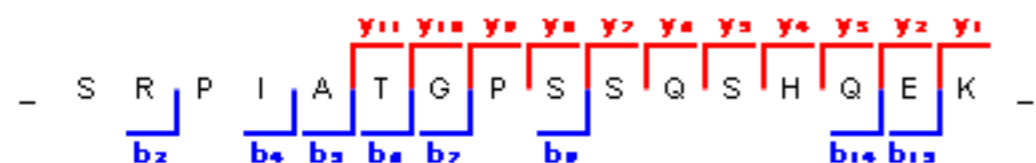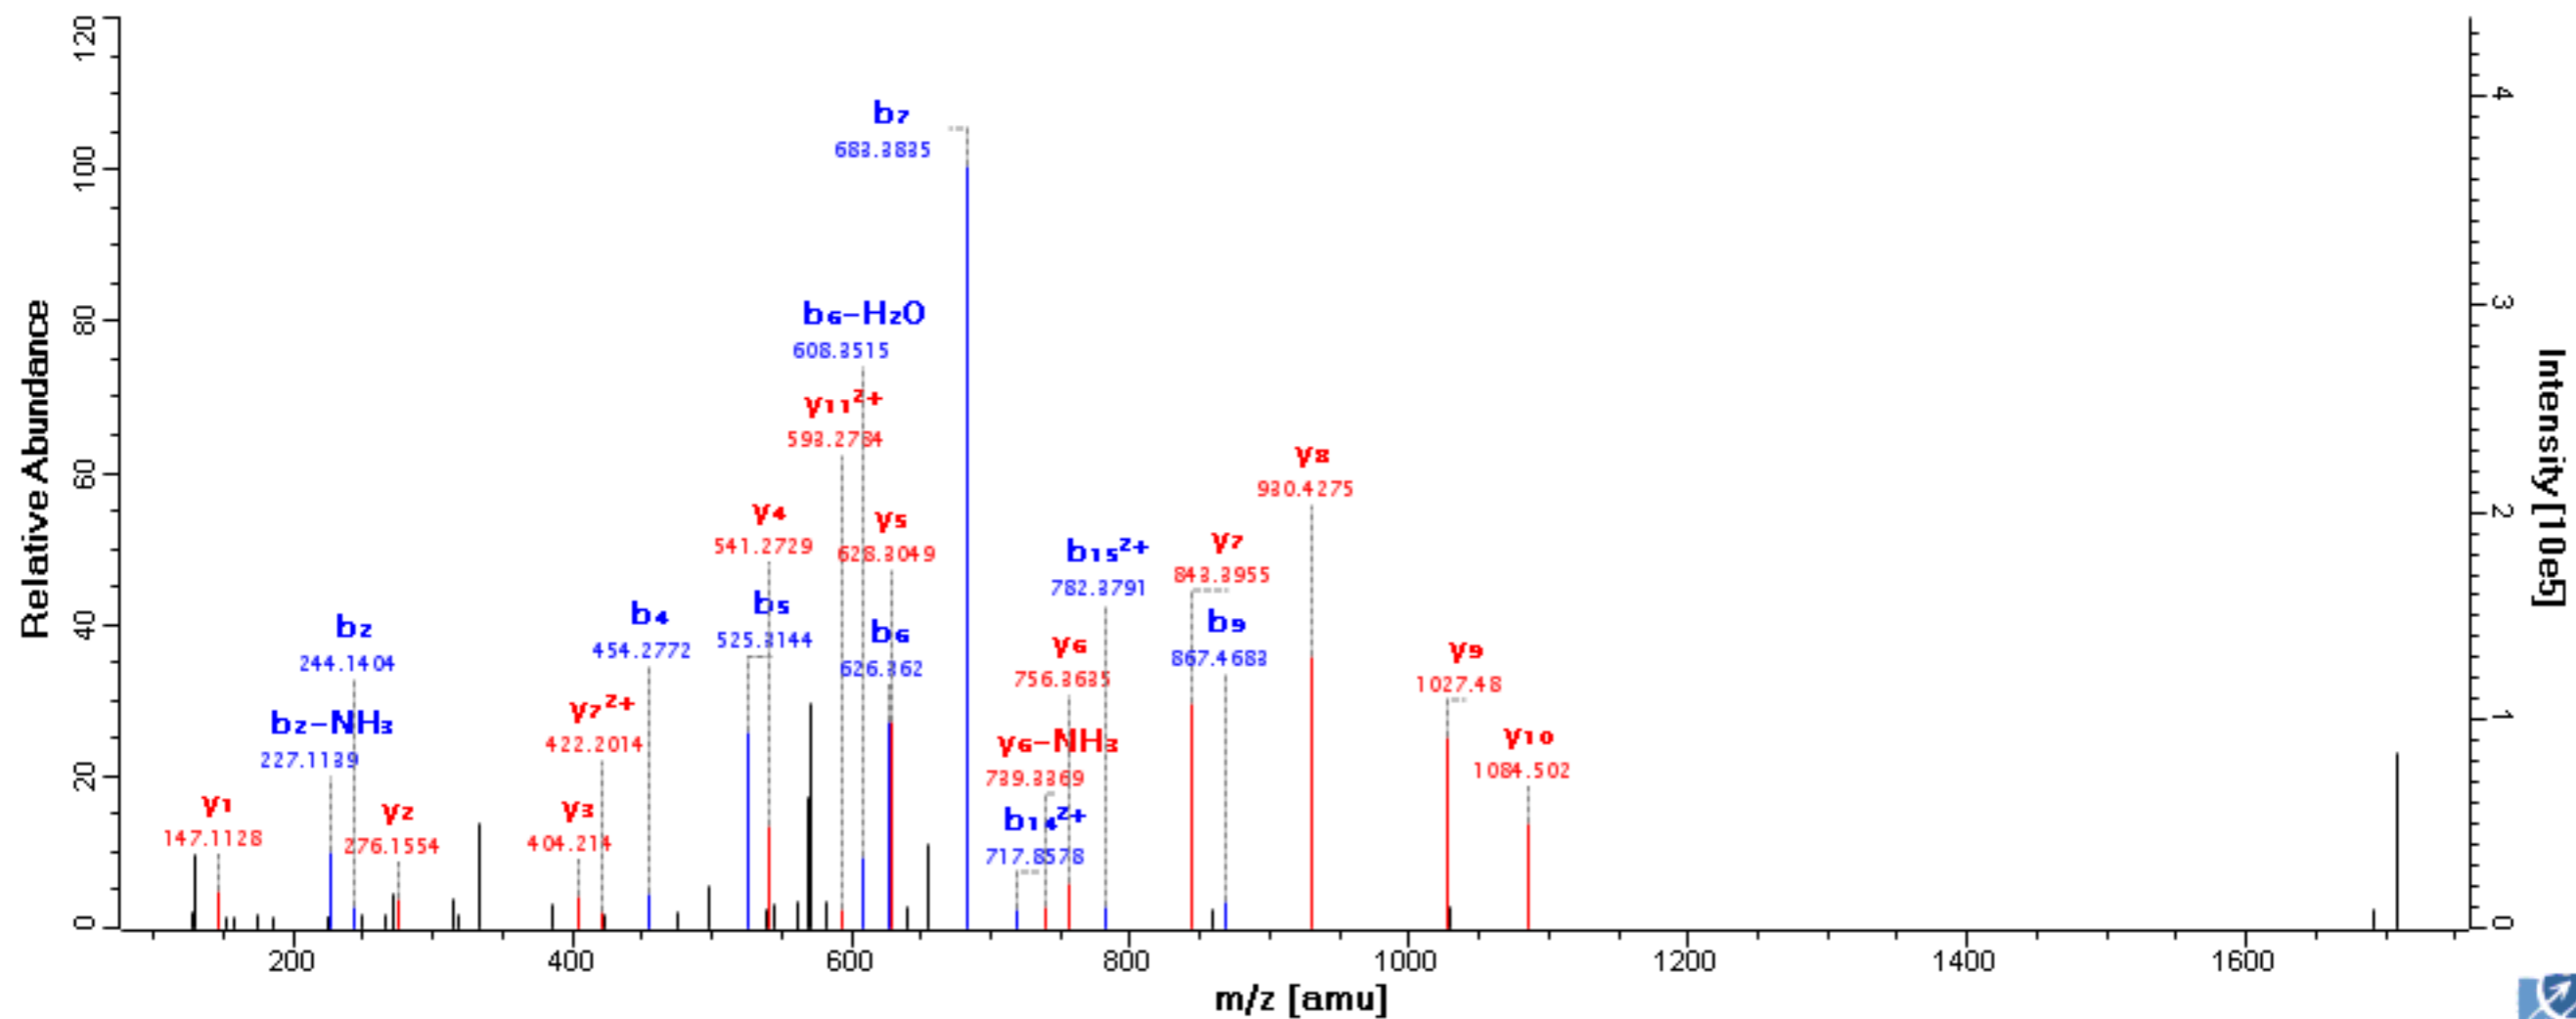

Source: Bibo\_20130531\_RM\_MSC07628\_1\_3  
 Scannumber: 7965  
 Protein: RPLP0; RPLP0; P05388; A8K4Z4; B4E3D5; Q3MHV2; Q53HK9; Q53HW2; Q8NHW5; Q3B7A4; Q6NSF2  
 Peptide Score: 117.52  
 Method: FTMS; HCD; 1

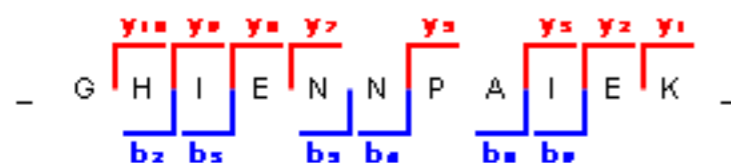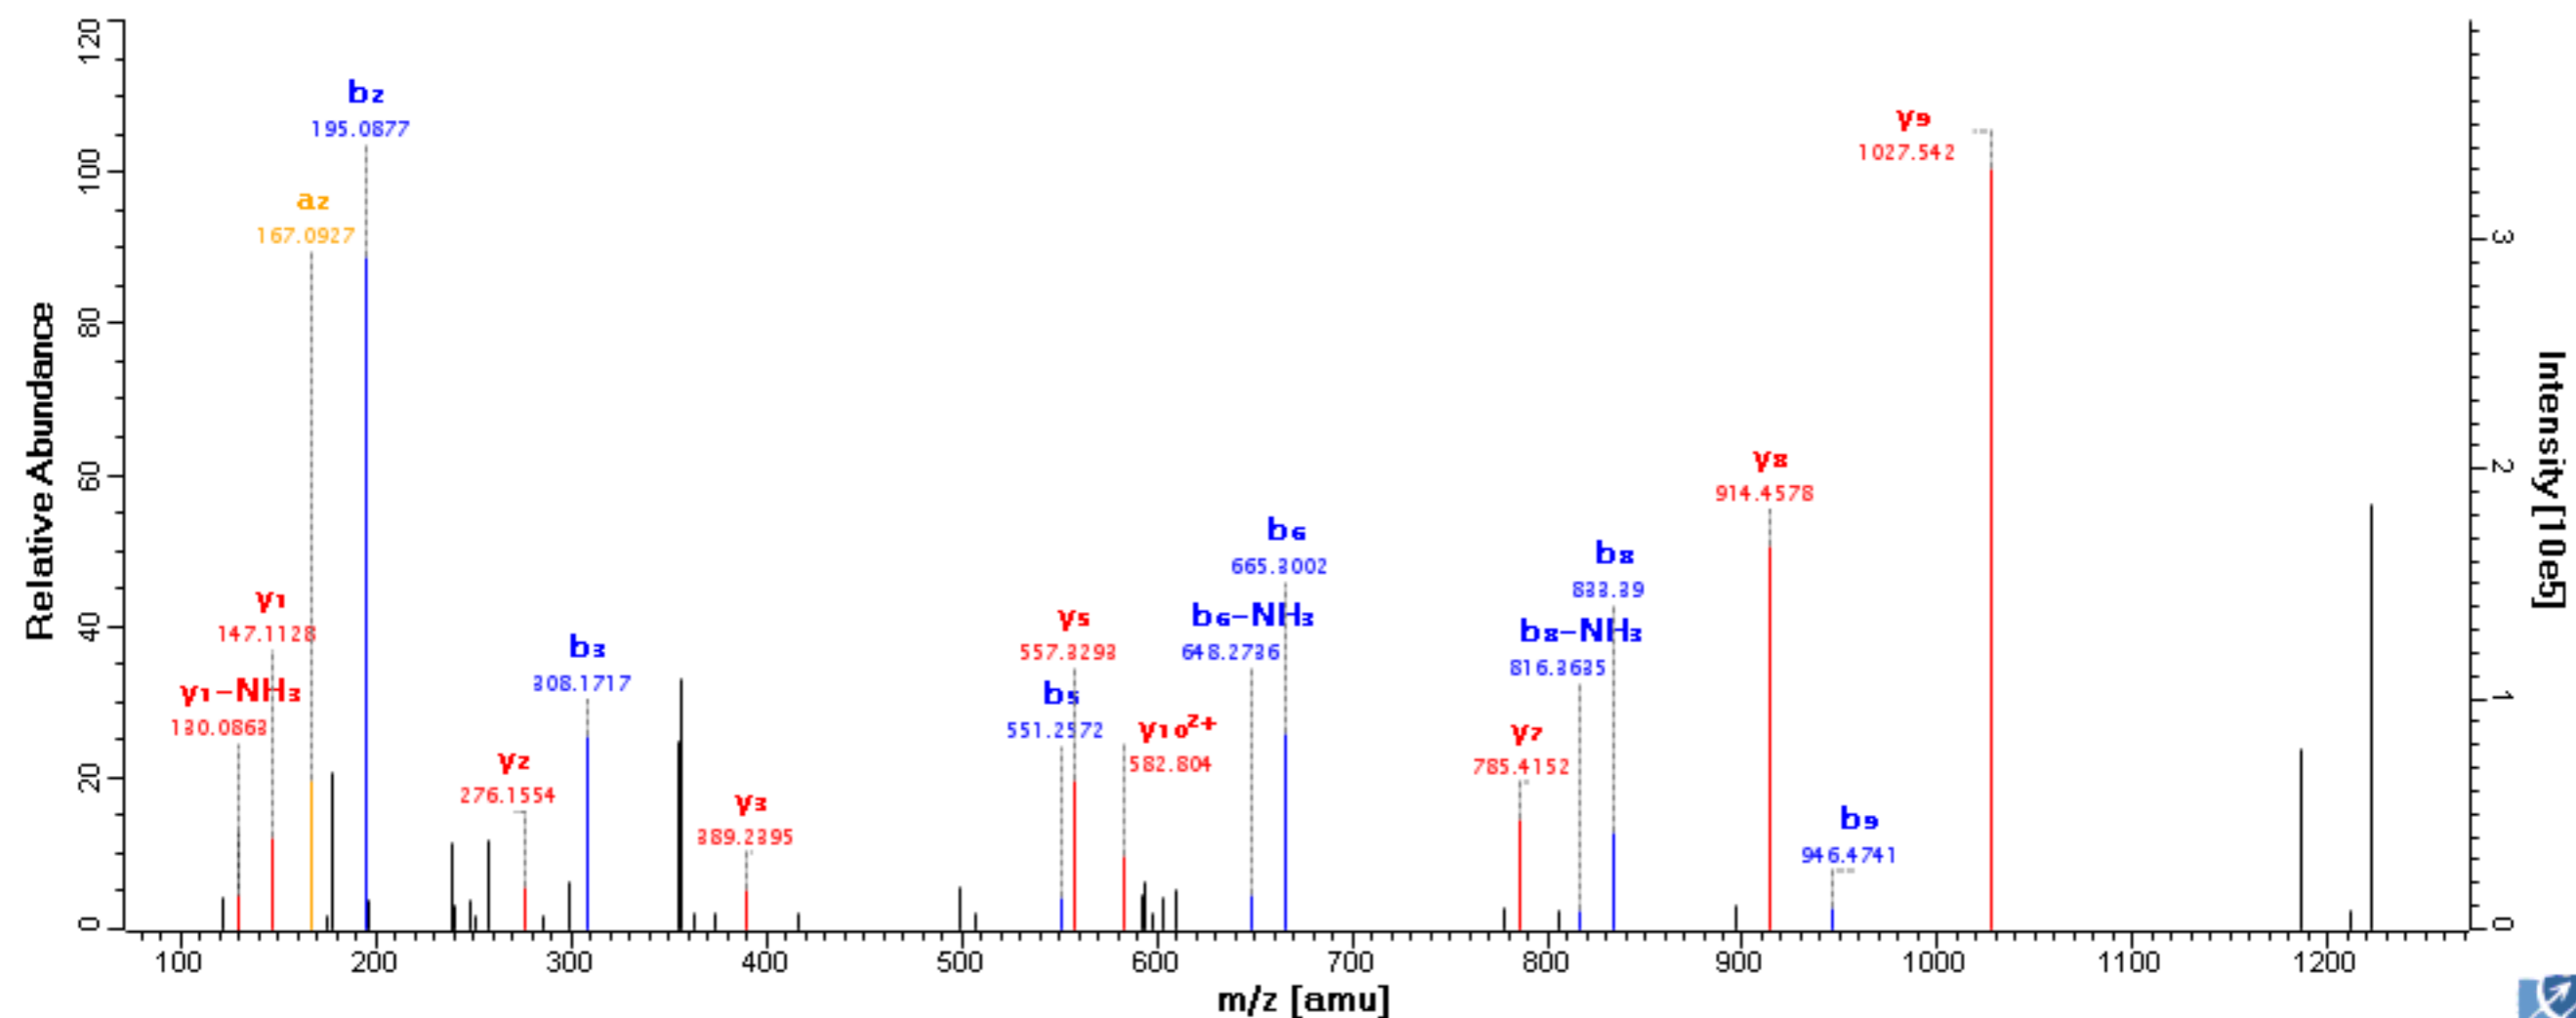

Source: Bibo\_20130531\_RM\_MSC07628\_1\_3  
 Scannumber: 8943  
 Protein: KIAA0794; UBXD7; UBXN7; O94888; B4E126  
 Peptide Score: 140.14  
 Method: FTMS; HCD; 1

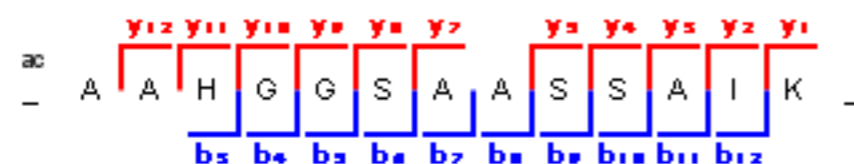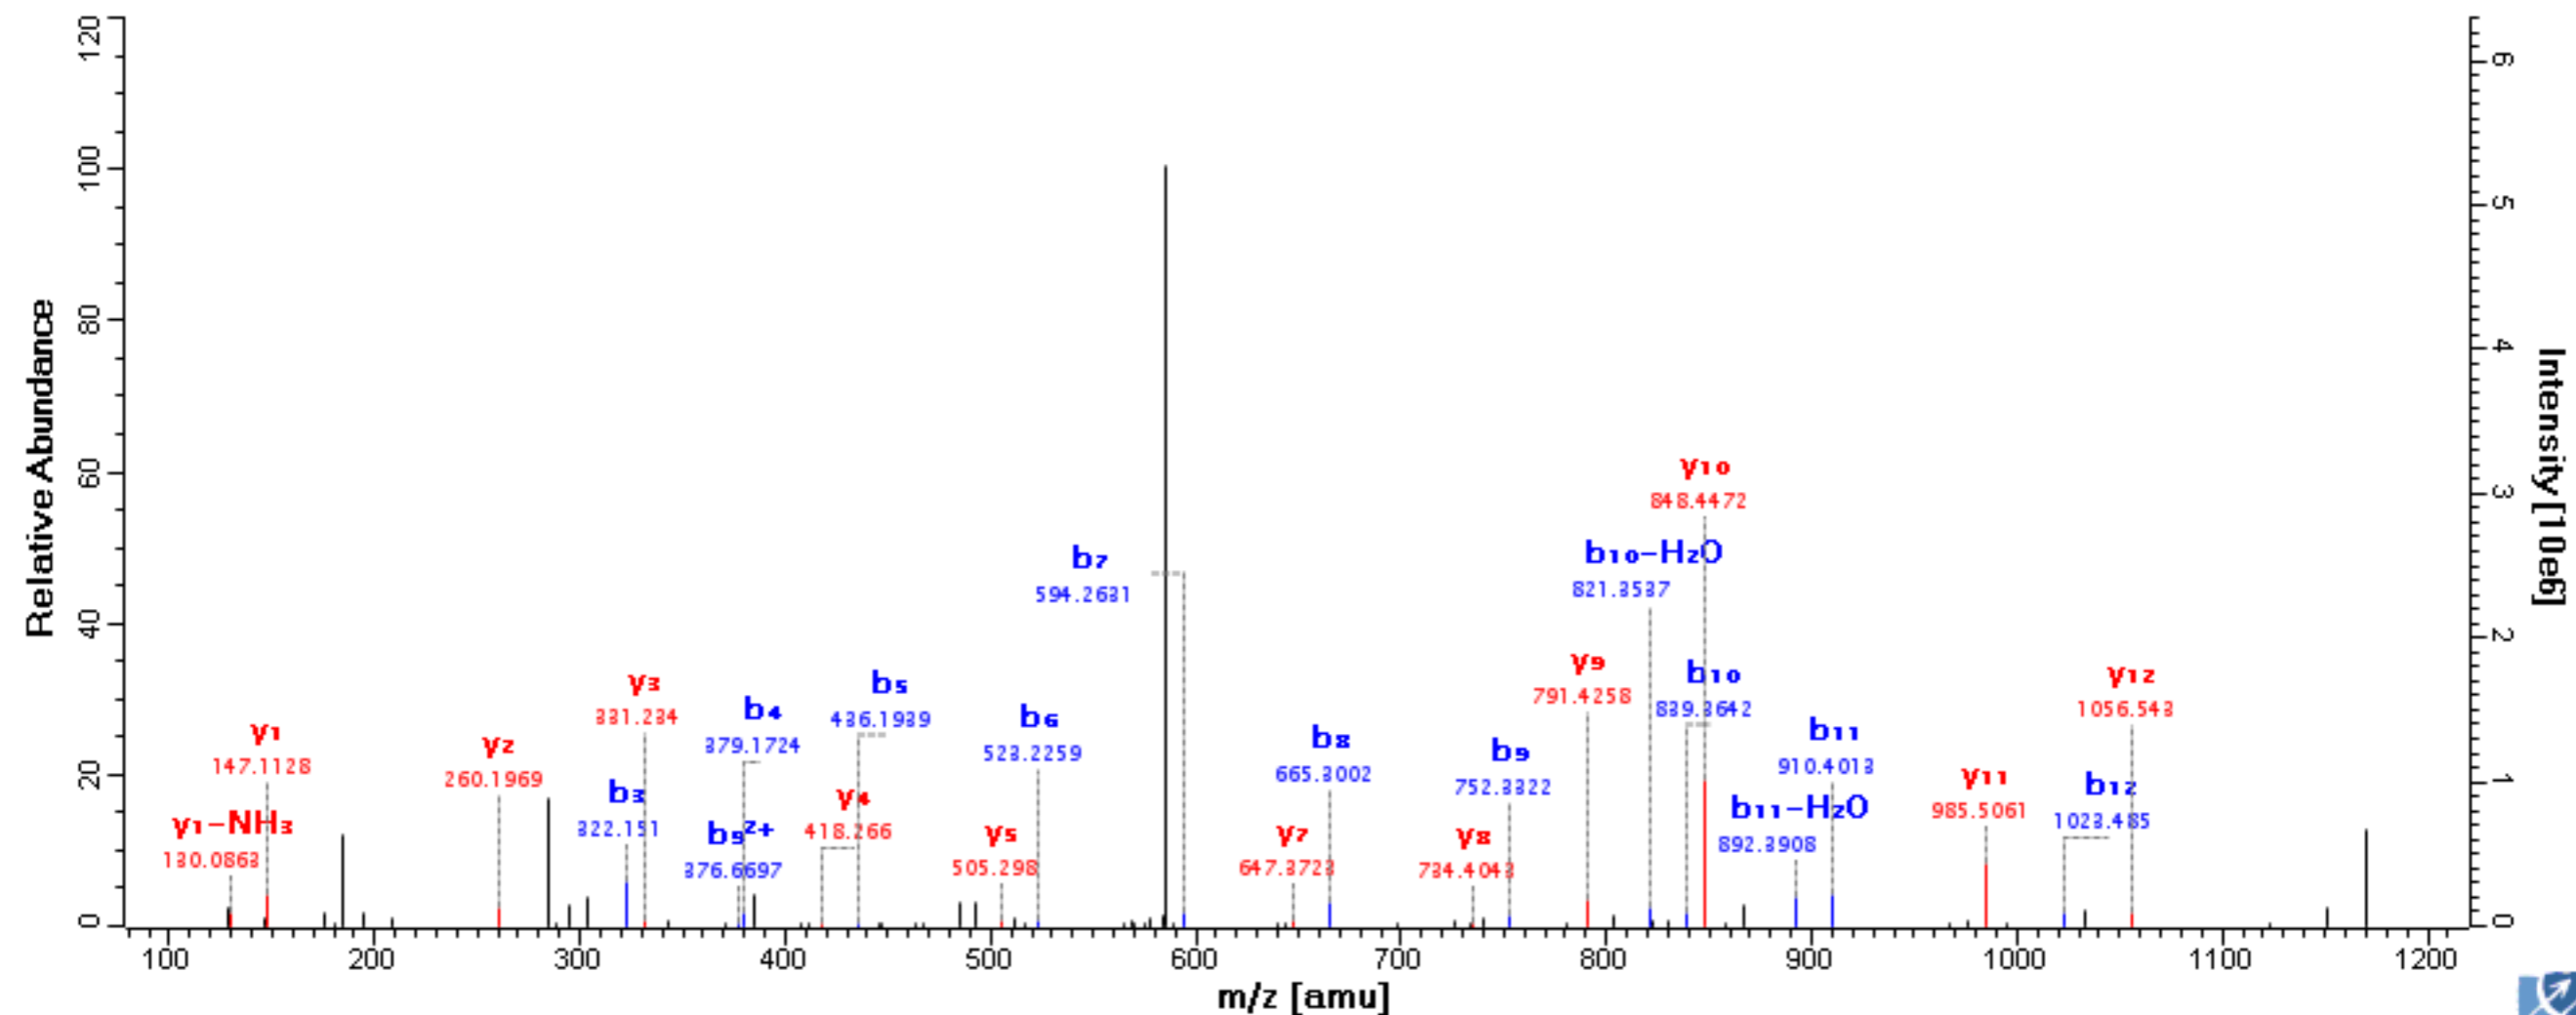

Source: Bibo\_20130531\_RM\_MSC07628\_1\_3

Scannumber: 11671

Protein: ANKT; BM-037; NUSAP1; PRO0310; Q9BXSE

Peptide Score: 99.22

Method: FTMS; HCD; 1

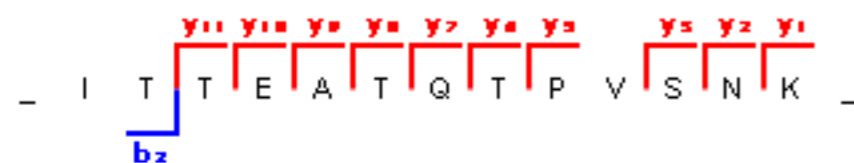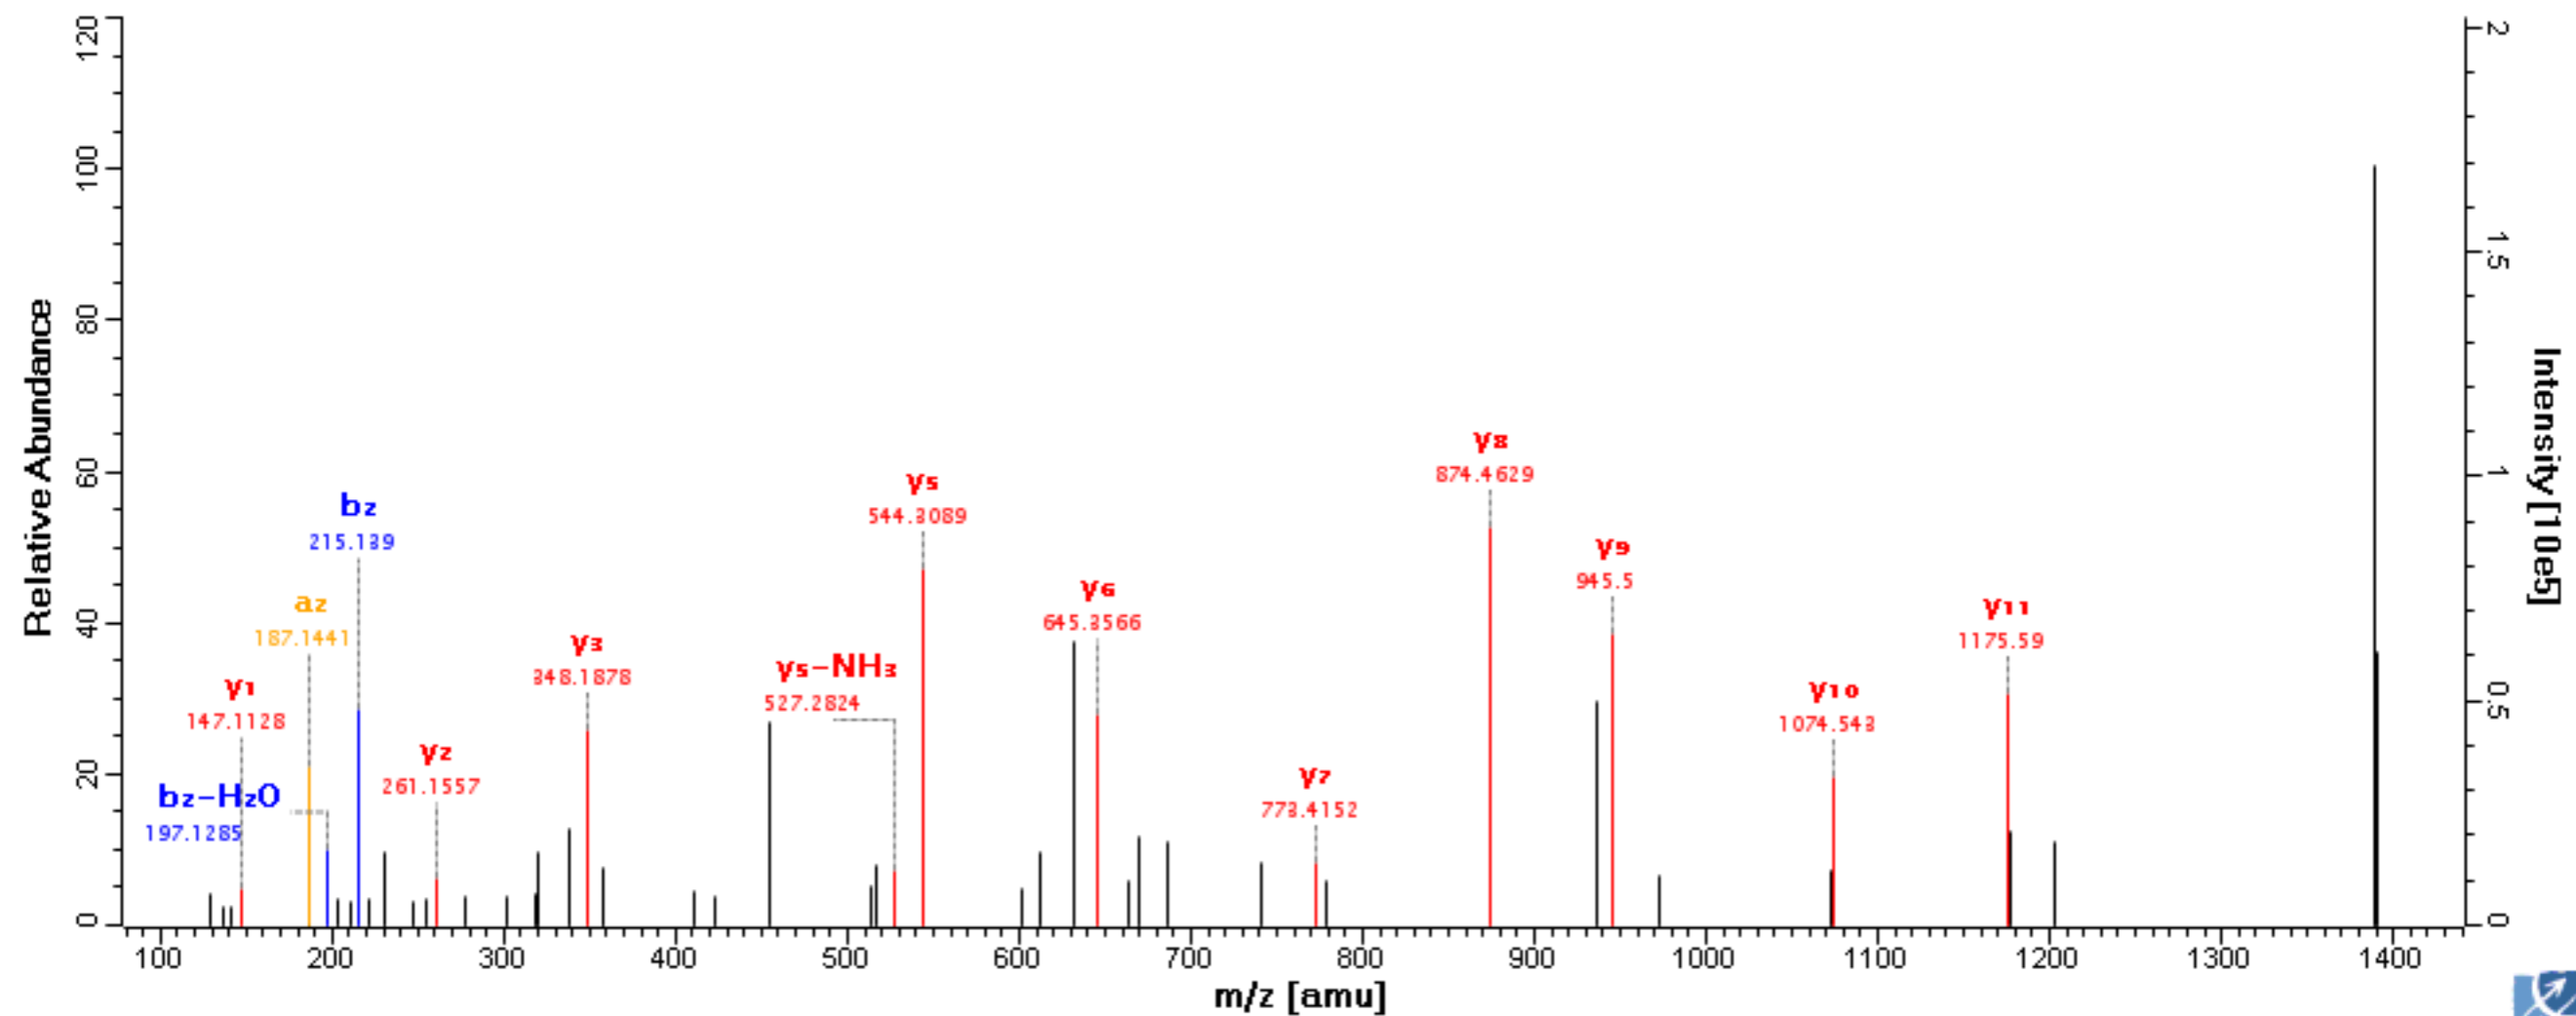

Source: Bibo\_20130531\_RM\_MSC07628\_1\_3  
 Scannumber: 11912  
 Protein: SEC22B; SEC22L1; O75396  
 Peptide Score: 99.82  
 Method: FTMS; HCD; 1

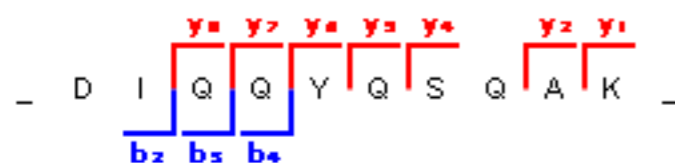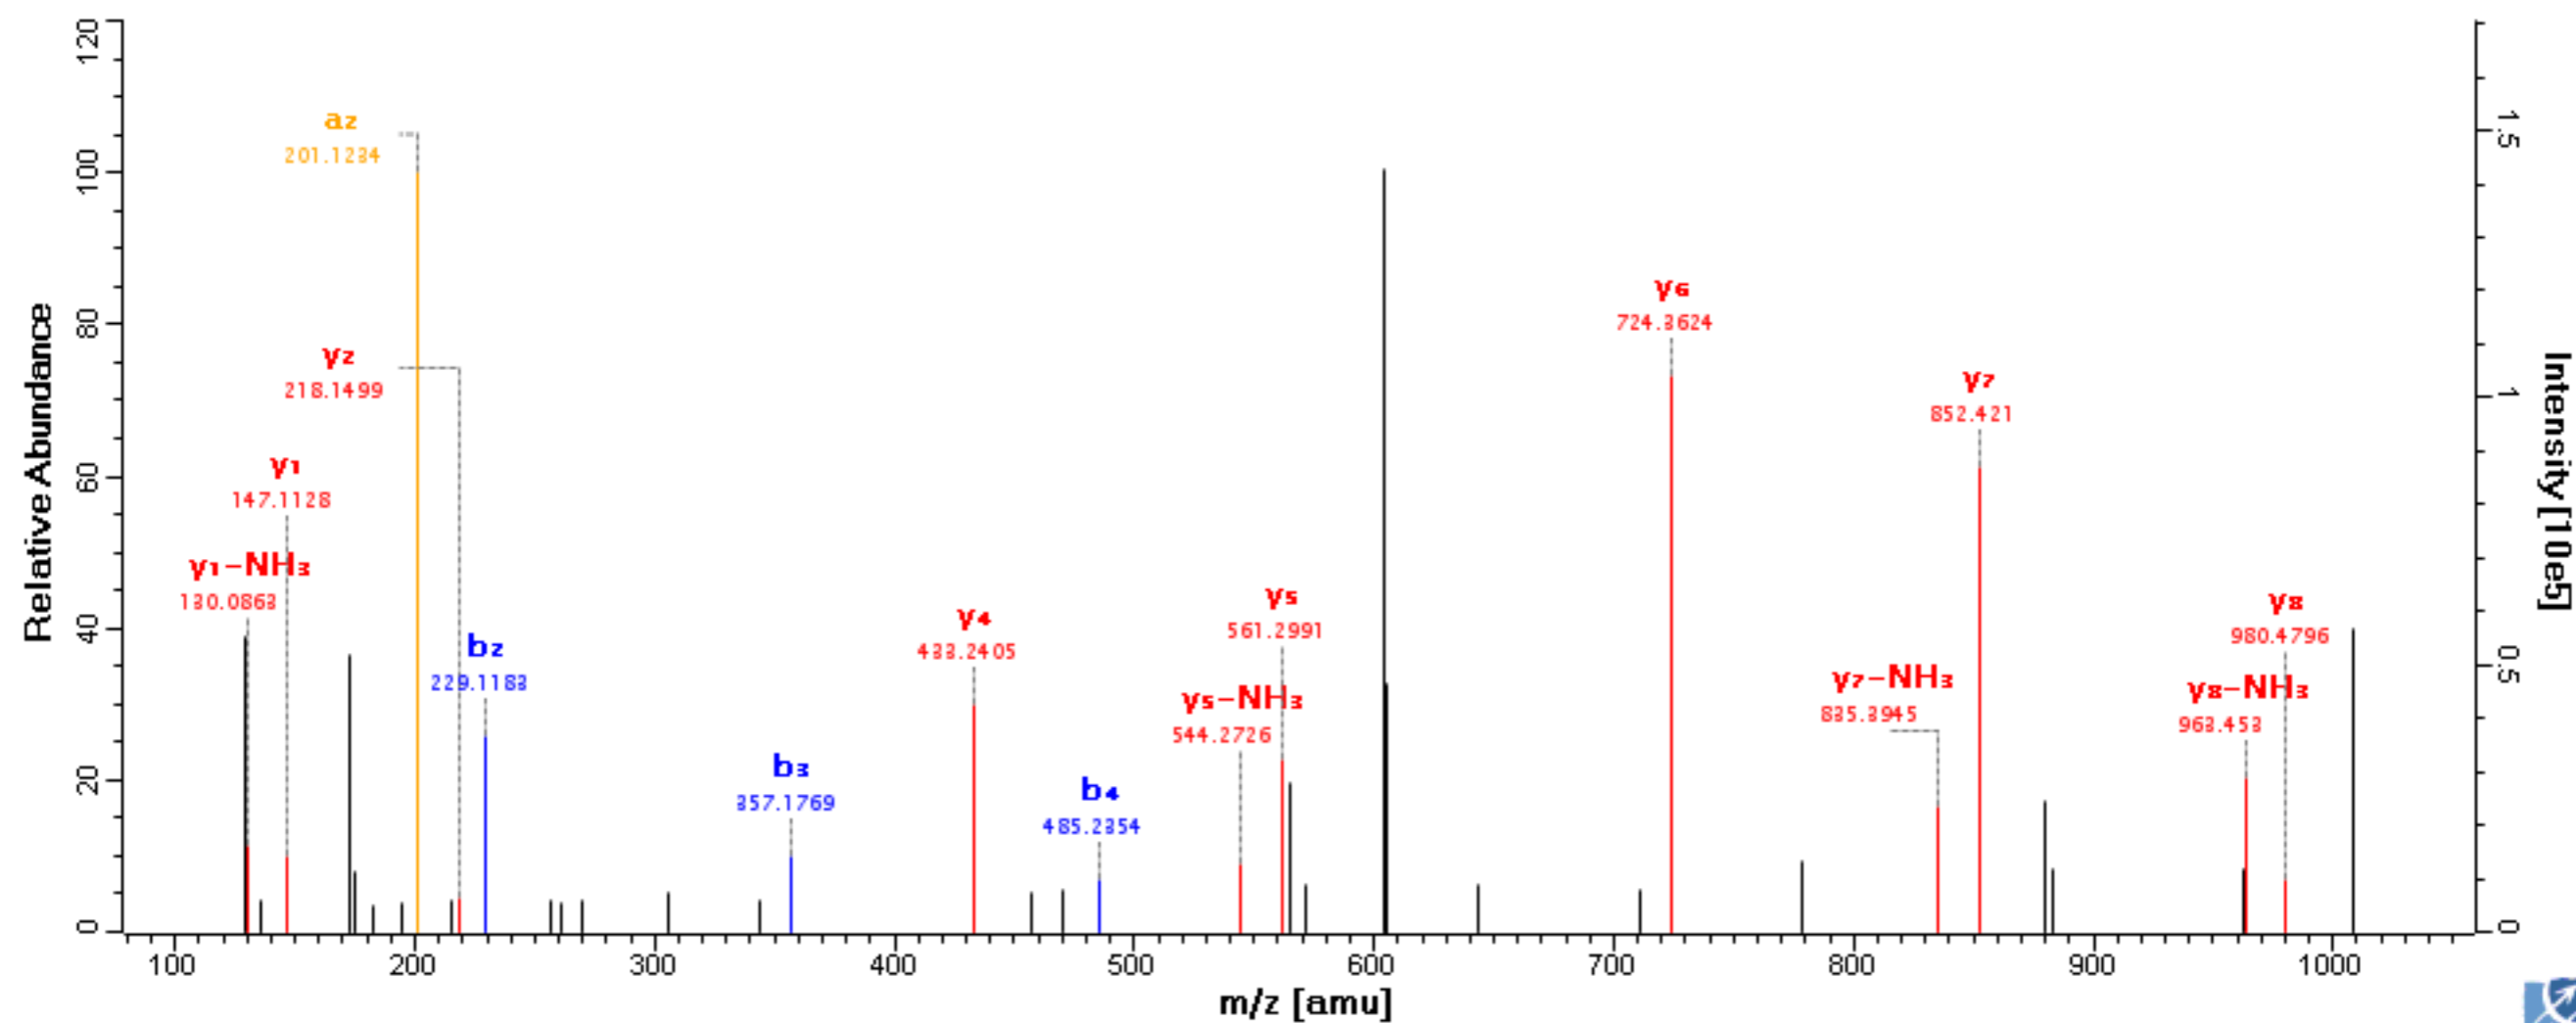

Source: Bibo\_20130531\_RM\_MSC07628\_1\_3  
 Scannumber: 12589  
 Protein: ERIC1; TACC3; Q9Y6A5; B4DYJ1; B4E355; E7EMT0; Q2NKK4  
 Peptide Score: 55.88  
 Method: FTMS; HCD; 1

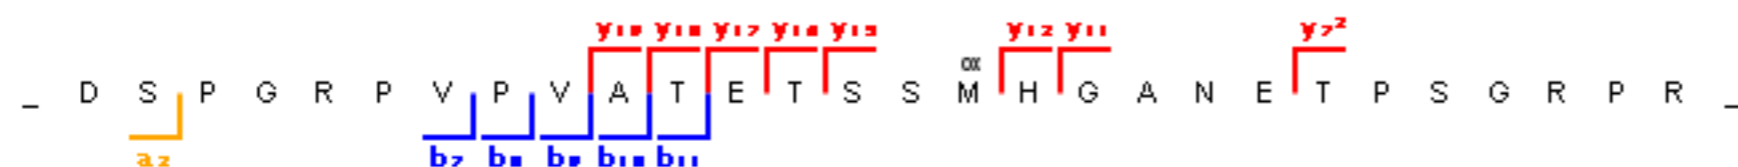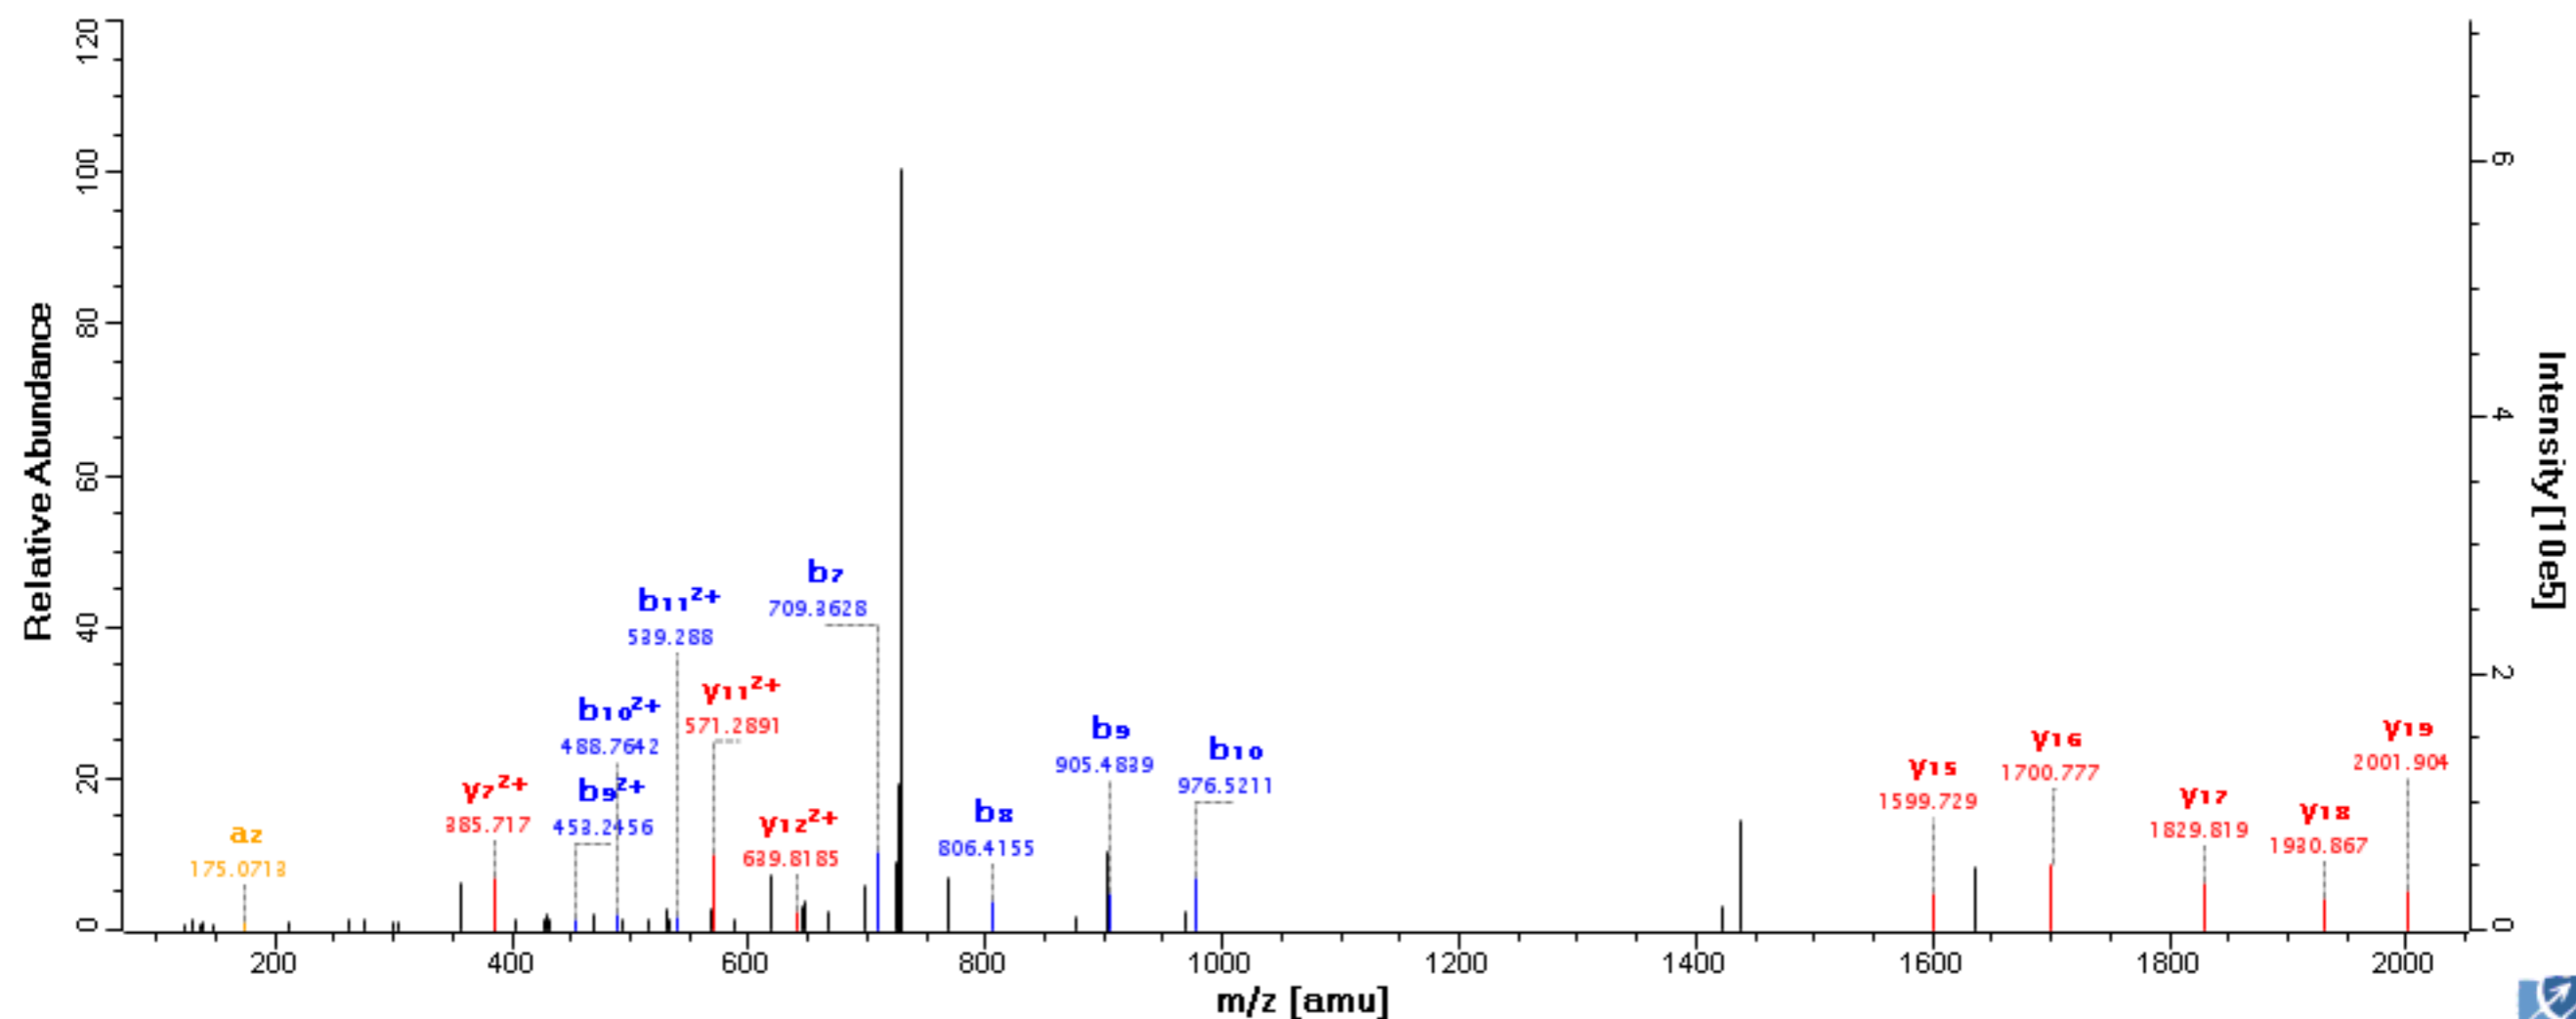

Source: Bibo\_20130531\_RM\_MSC07628\_1\_3  
 Scannumber: 13461  
 Protein: OTUD5; OTUD5; OTUD5; Q96G74-1; Q96G74; Q96G74-3; Q96G74; Q96G74-2; Q96G74; B4DGG7  
 Peptide Score: 120.77  
 Method: FTMS; HCD; 1

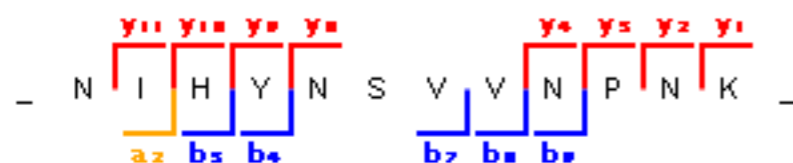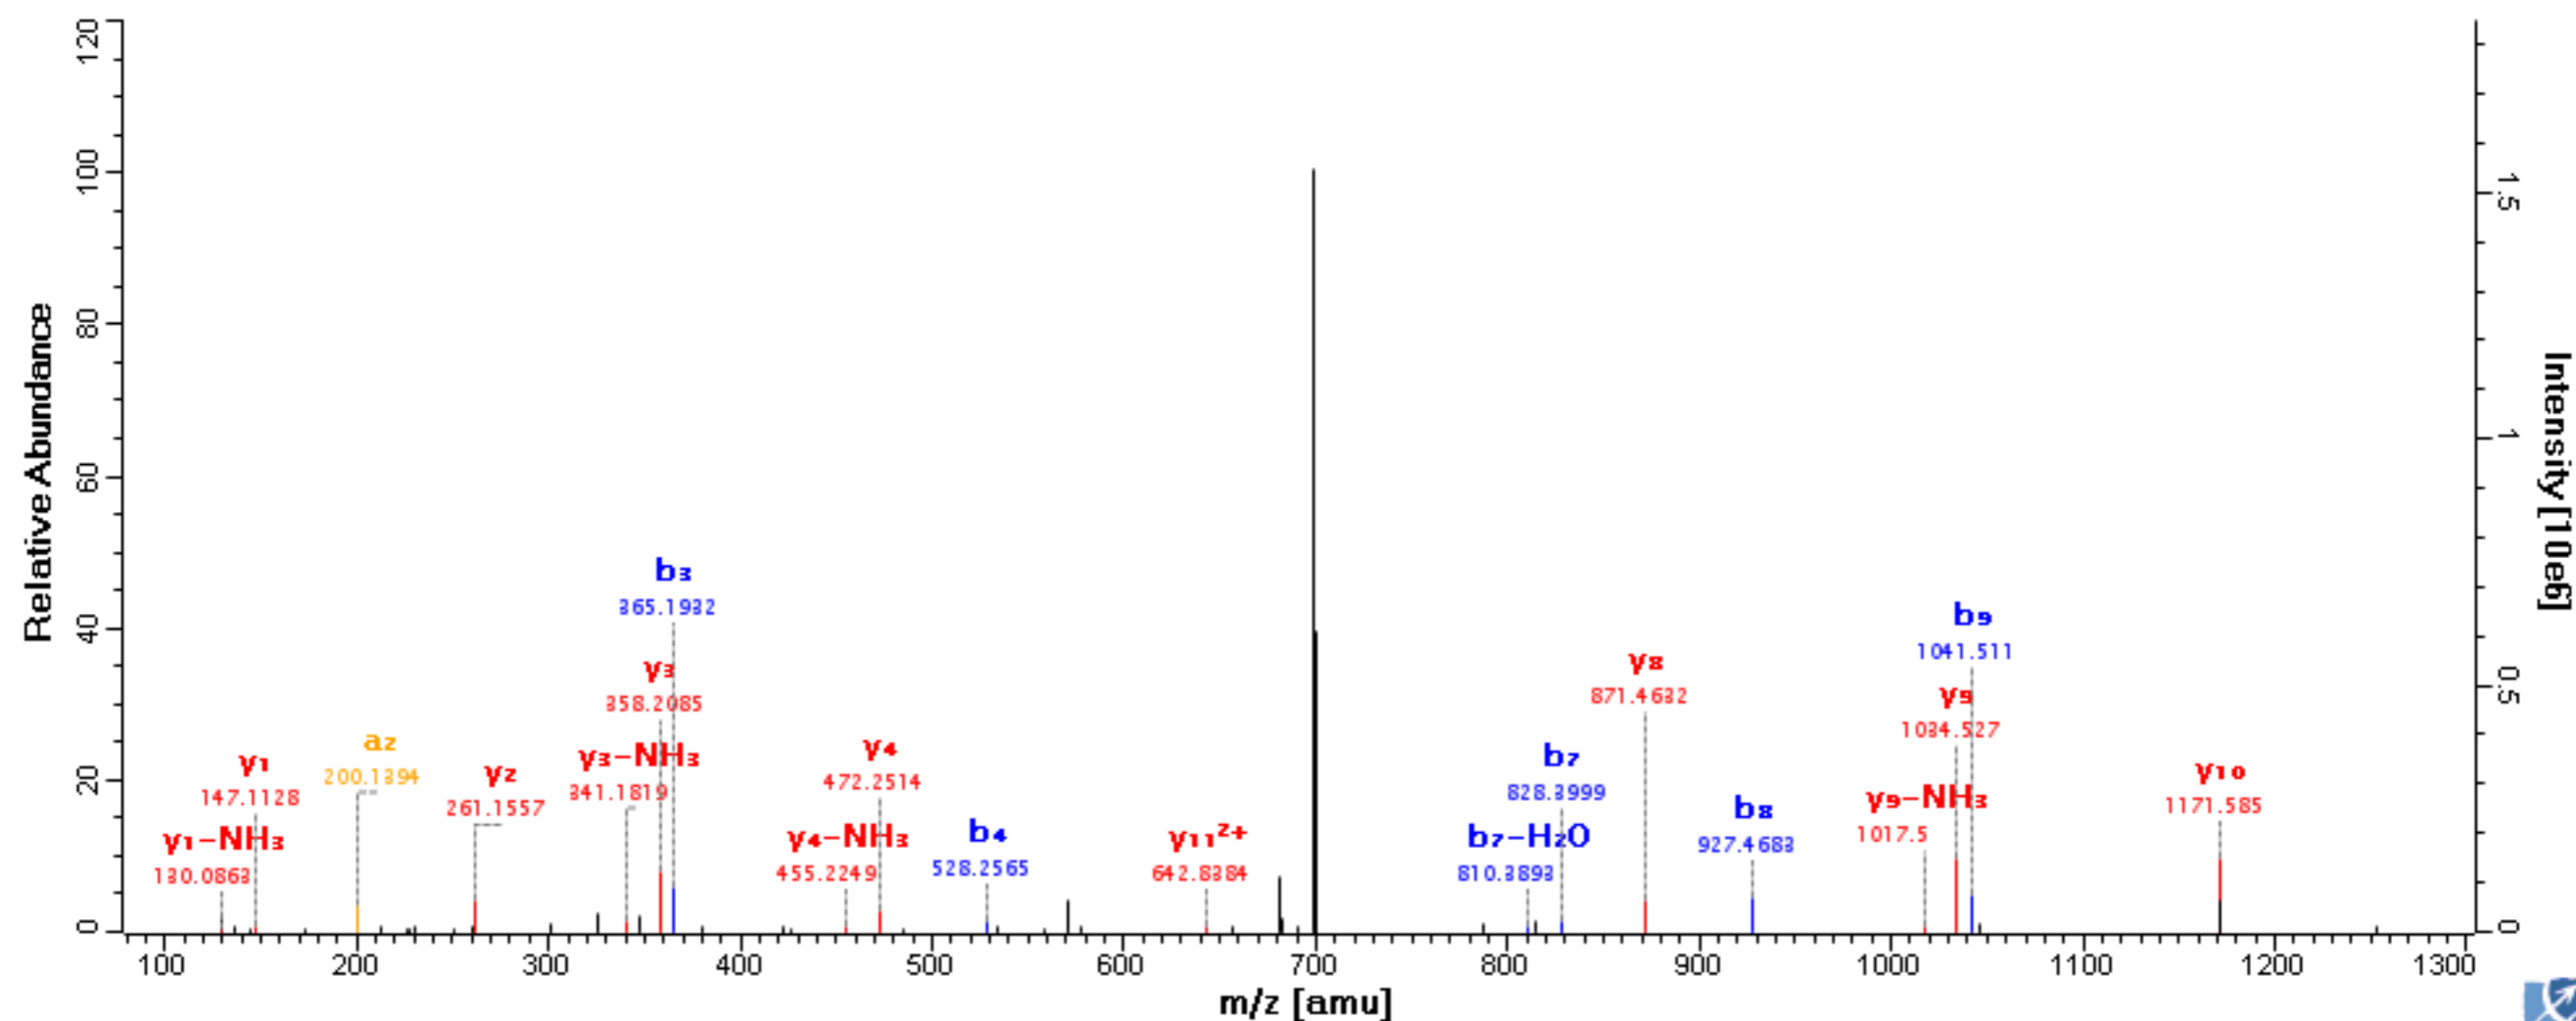

Source: Bibo\_20130531\_RM\_MSC07628\_1\_3

Scannumber: 13879

Protein: KIAA1835; RANGAP1; SD; RANGAP1; RP4-756G23.7-007; RANGAP1; RP4-756G23.7-009; RANGAP1; RP4-756G23.7-008; P46060; BOQYT3; B4DY16; B4E0U0; Q8WU57; Q9BSK3; BOQYT4; E

Peptide Score: 137.17

Method: FTMS; HCD; 1

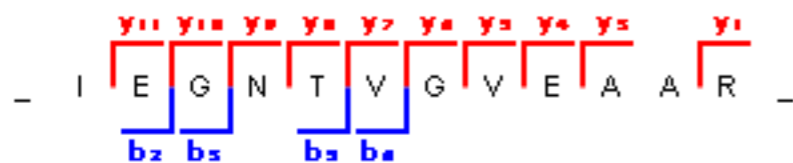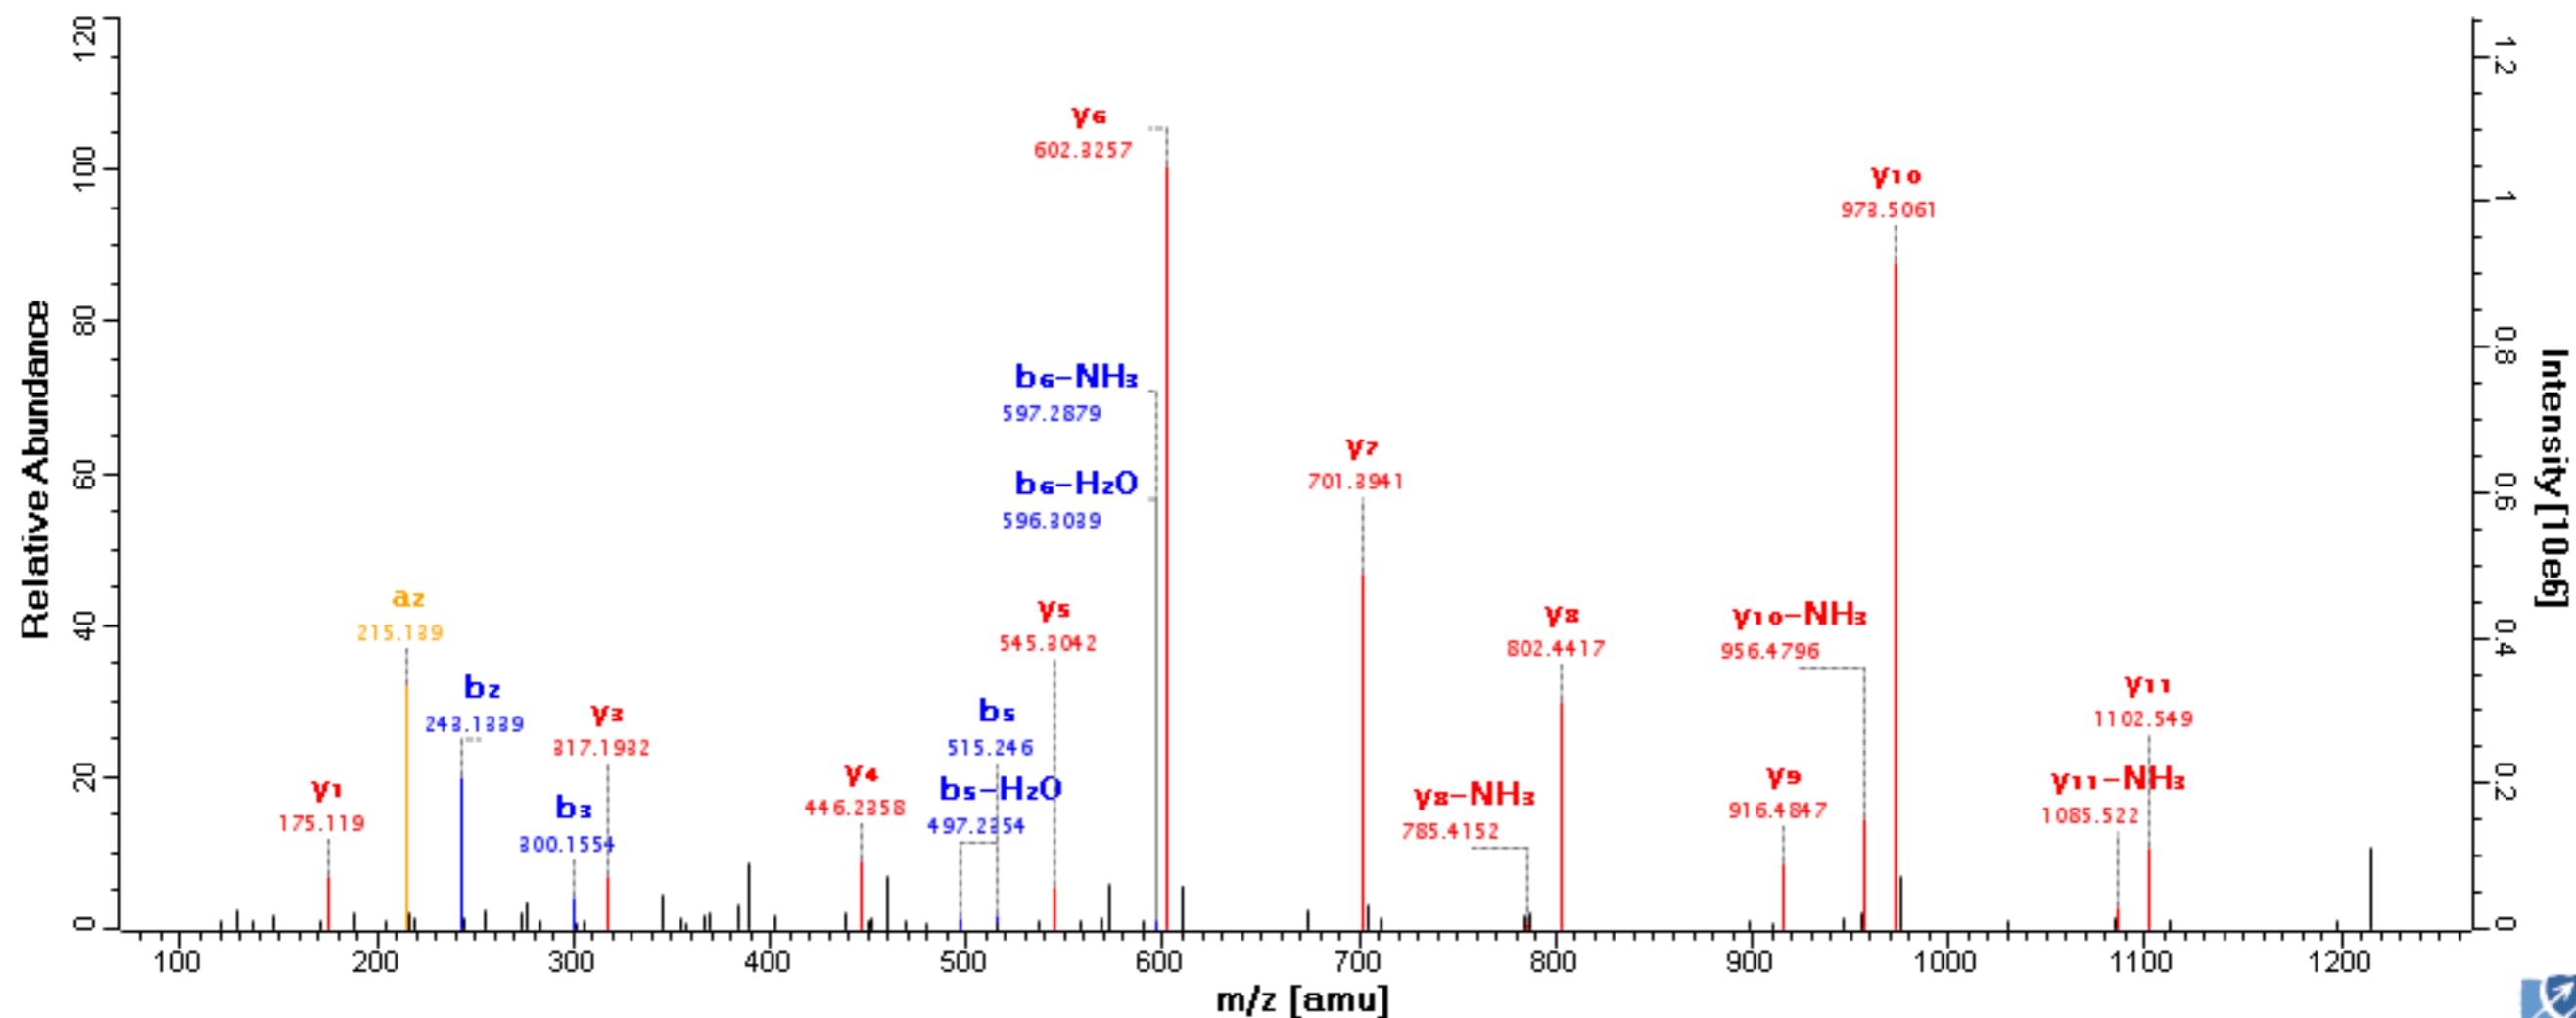

Source: Bibo\_20130531\_RM\_MSC07628\_1\_3  
 Scannumber: 15239  
 Protein: E5RG04  
 Peptide Score: 99.22  
 Method: FTMS; HCD; 1

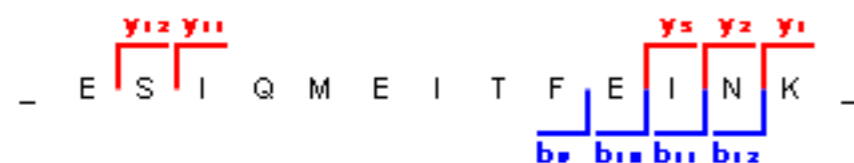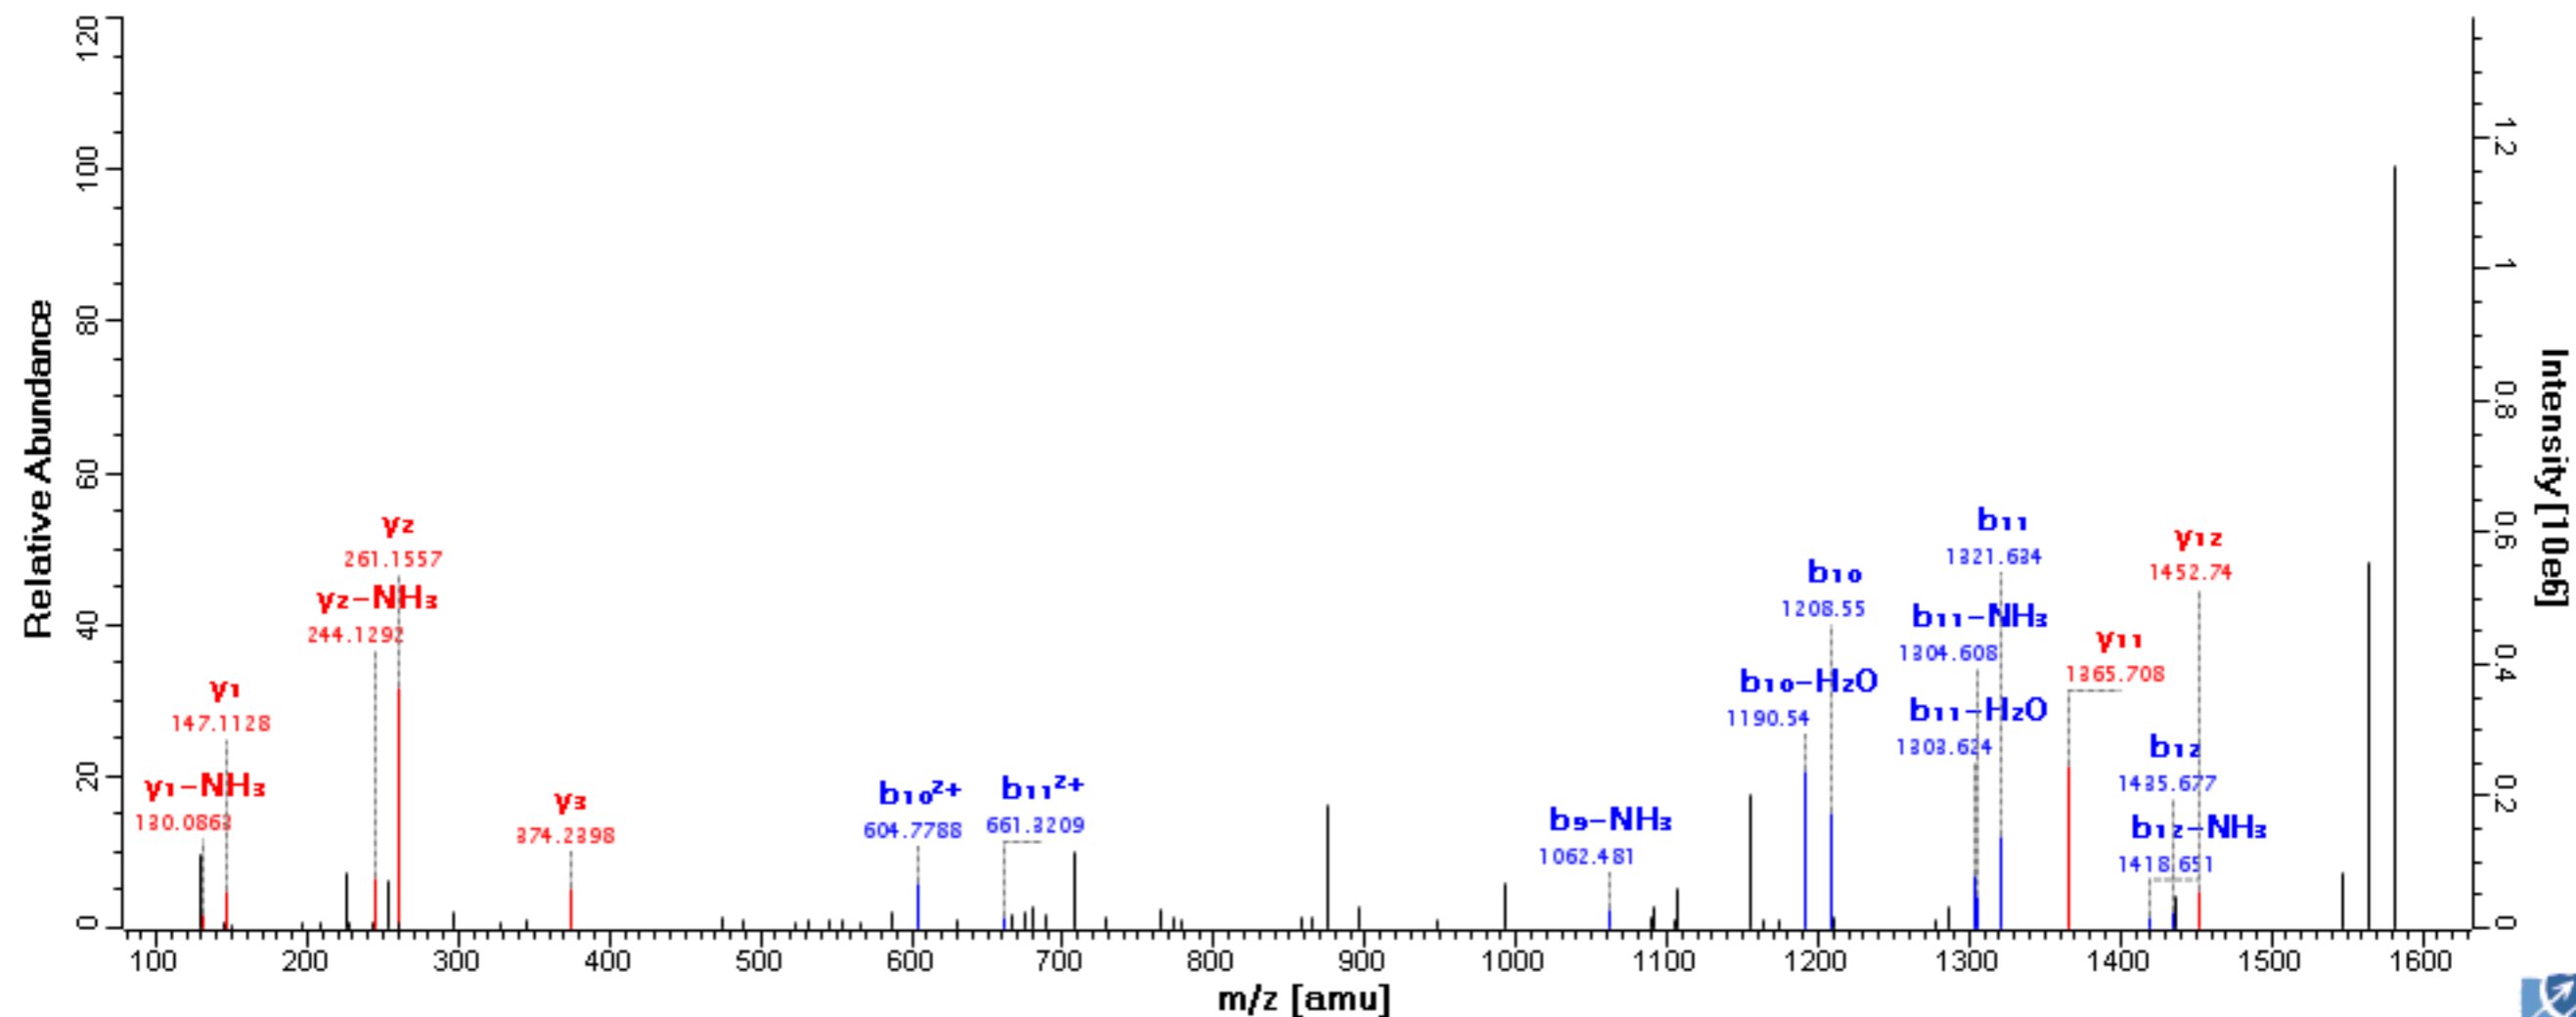

Source: Bibo\_20130531\_RM\_MSC07628\_1\_3  
 Scannumber: 15446  
 Protein: DDX21; DDX56; NOH61; DDX56; Q9NY93; Q53HB9; C9JY95  
 Peptide Score: 80.52  
 Method: FTMS; HCD; 1

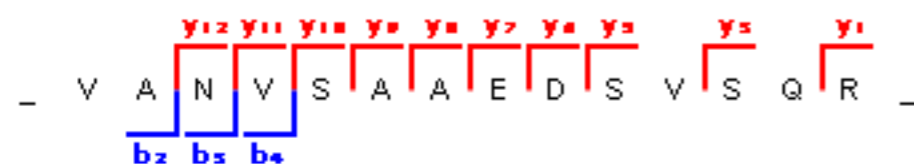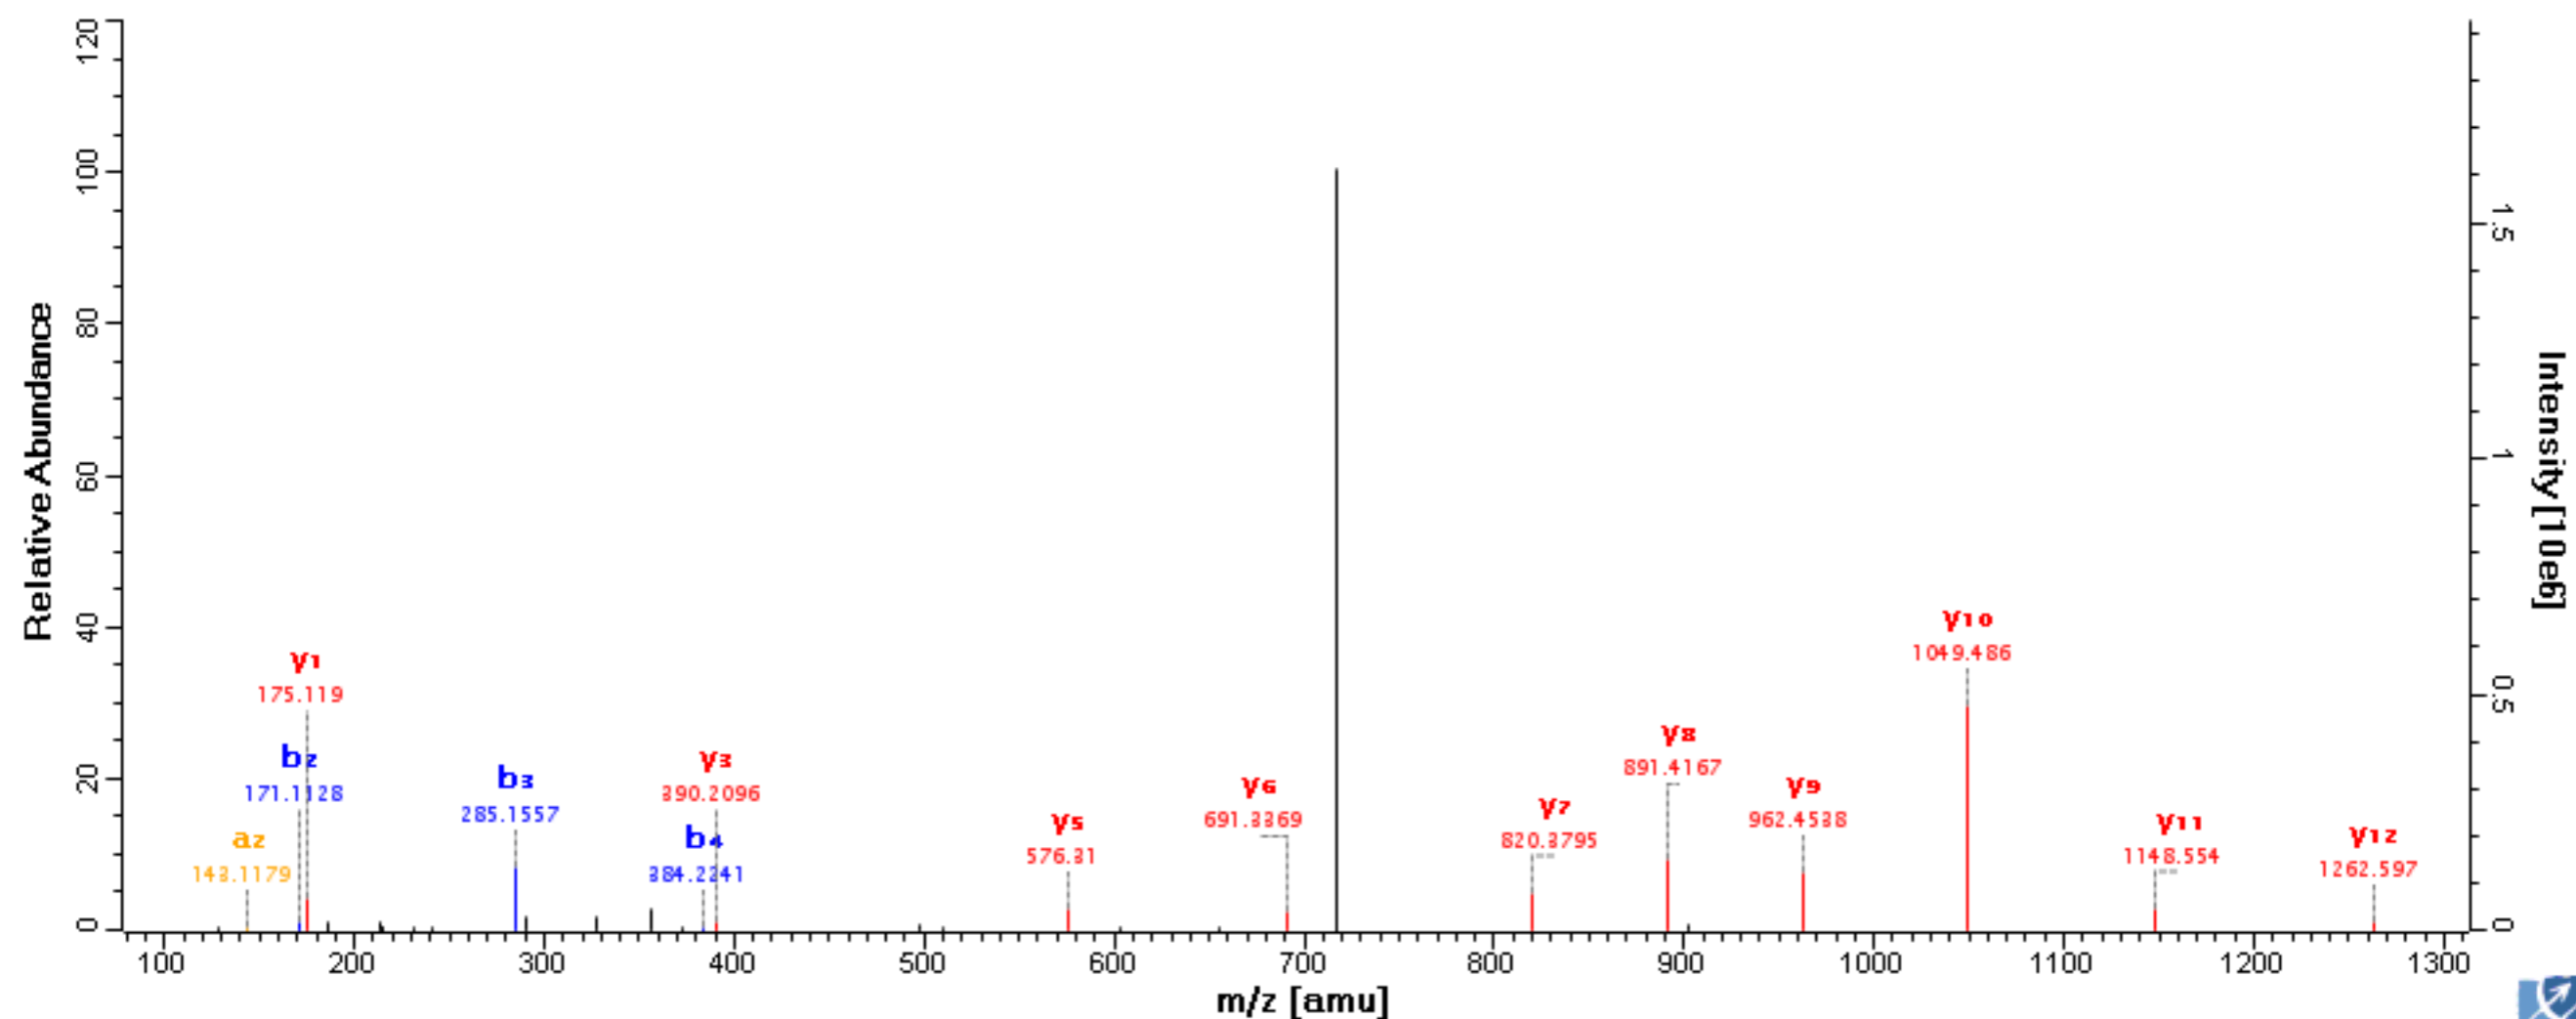

Source: Bibo\_20130531\_RM\_MSC07628\_1\_3  
 Scannumber: 15646  
 Protein: DAL1; EPB41L3; KIAA0987; DAL1; EPB41L3; KIAA0987; Q9Y2J2-1; Q9Y2J2; B7Z4I5; Q9Y2J2-2; Q9Y2J2; B3KY28; A8K968; B2RBO2; B3KT50; E7EUF8; B7Z2D7; B7Z8M8; B7Z2G3  
 Peptide Score: 93.96  
 Method: FTMS; HCD; 1

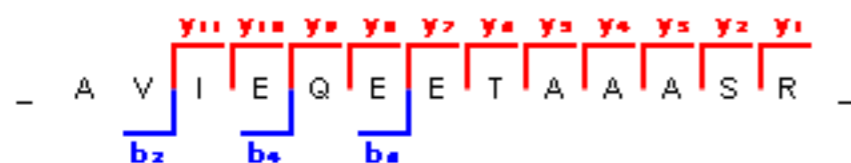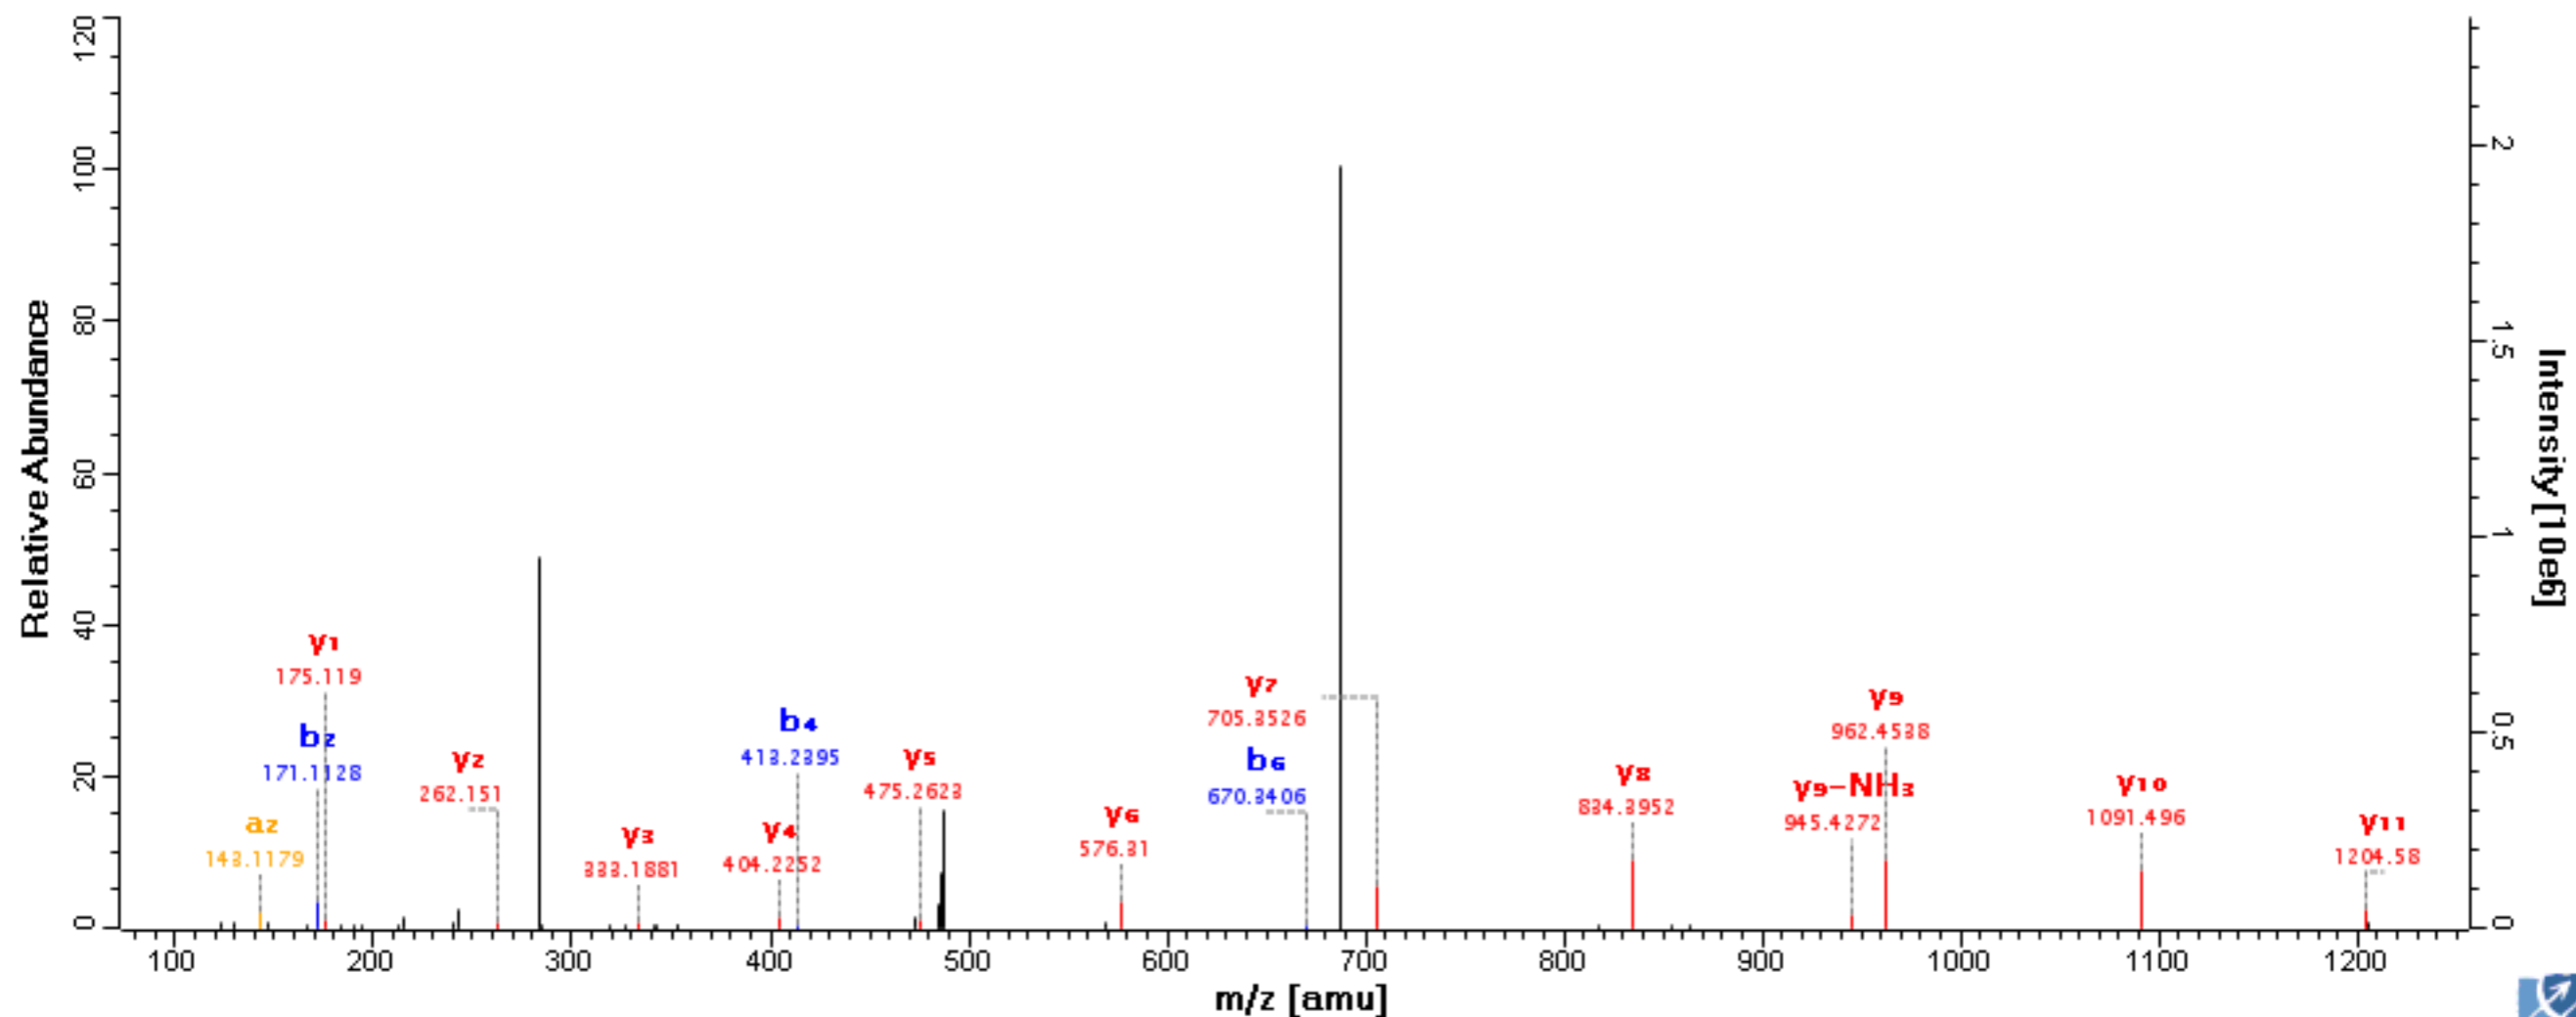

Source: Bibo\_20130531\_RM\_MSC07628\_1\_3  
 Scannumber: 16056  
 Protein: E5RG04  
 Peptide Score: 88.19  
 Method: FTMS; HCD; 1

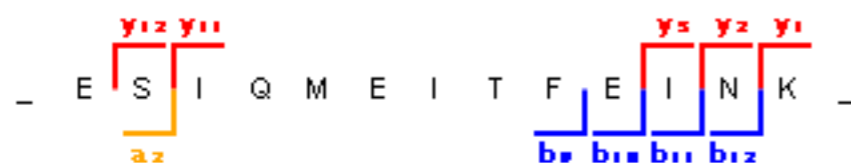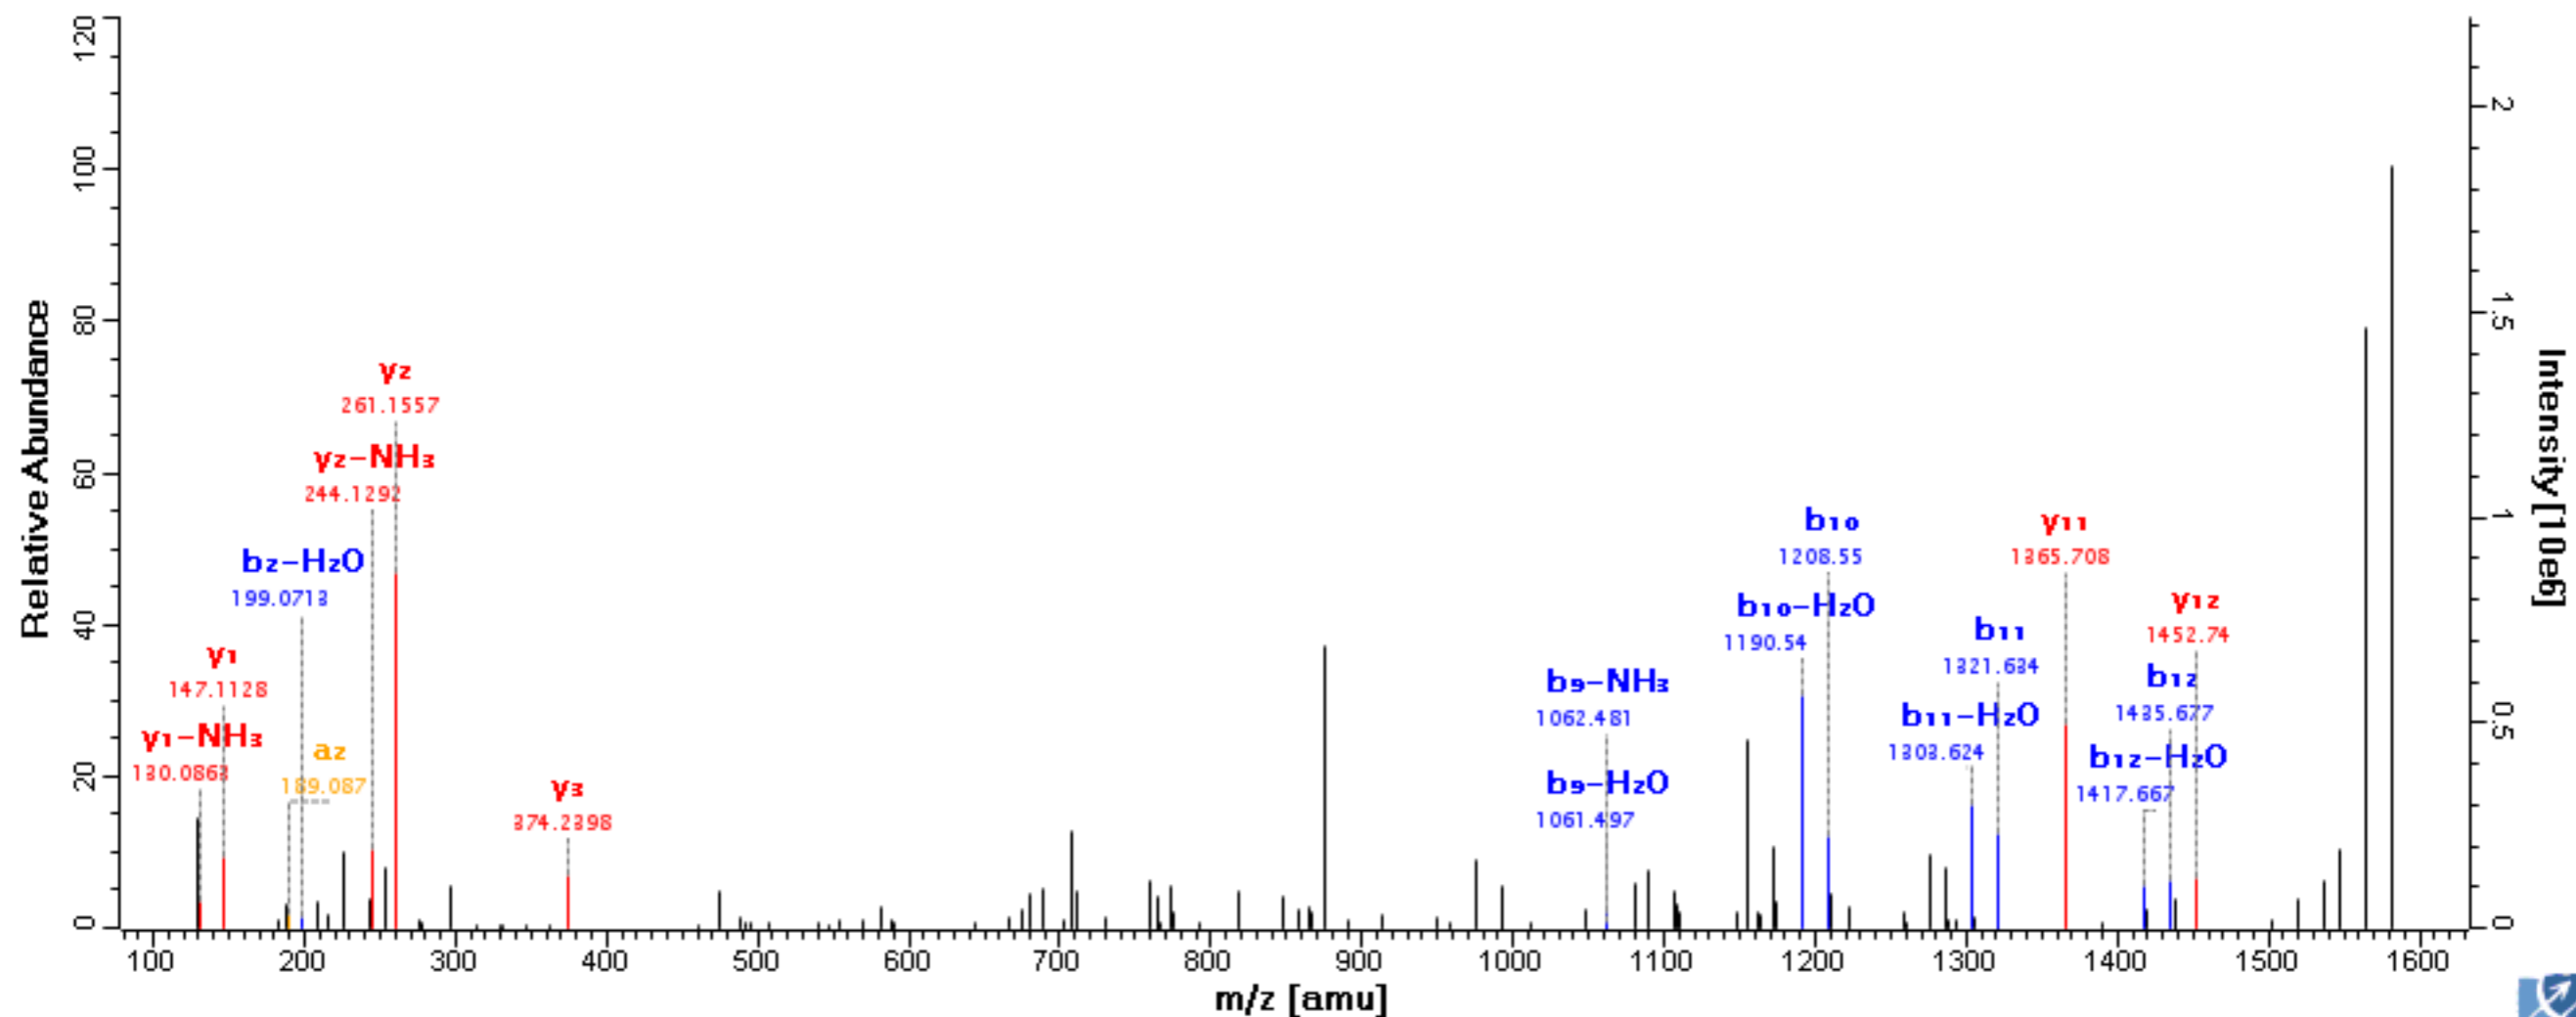

Source: Bibo\_20130531\_RM\_MSC07628\_1\_3  
 Scannumber: 16270  
 Protein: E5RG04  
 Peptide Score: 89.8  
 Method: FTMS; HCD; 1

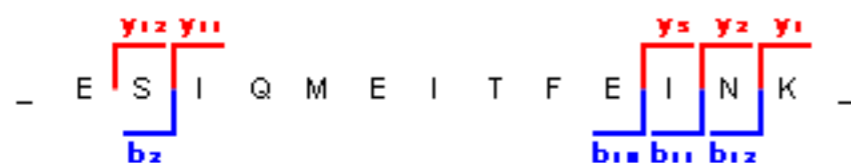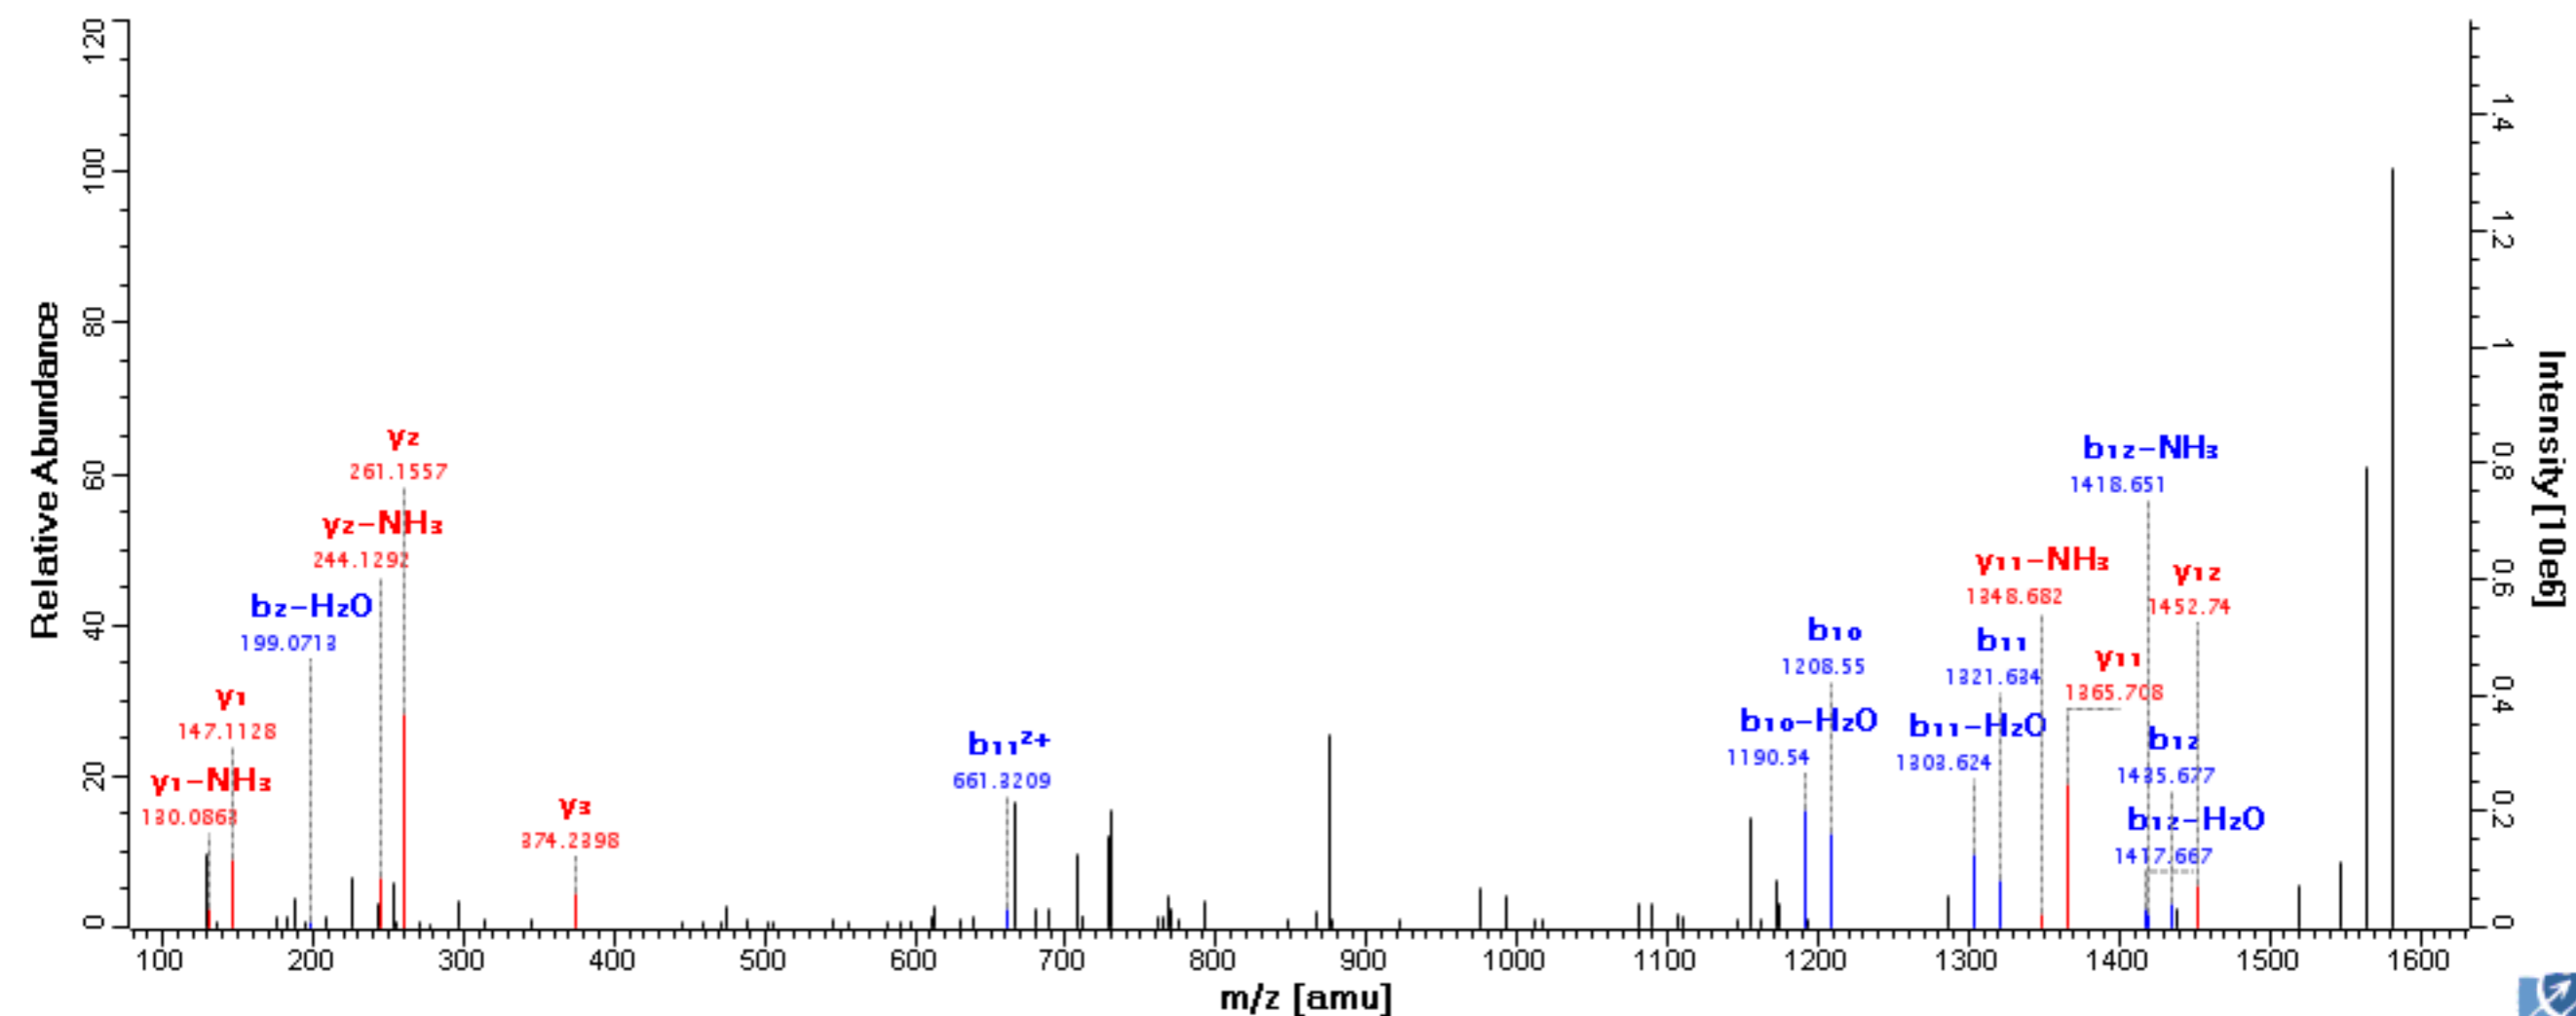

Source: Bibo\_20130531\_RM\_MSC07628\_1\_3  
 Scannumber: 17056  
 Protein: E5RG04  
 Peptide Score: 87  
 Method: FTMS; HCD; 1

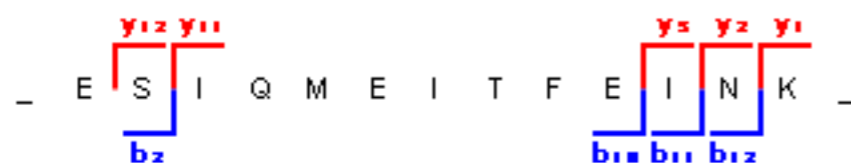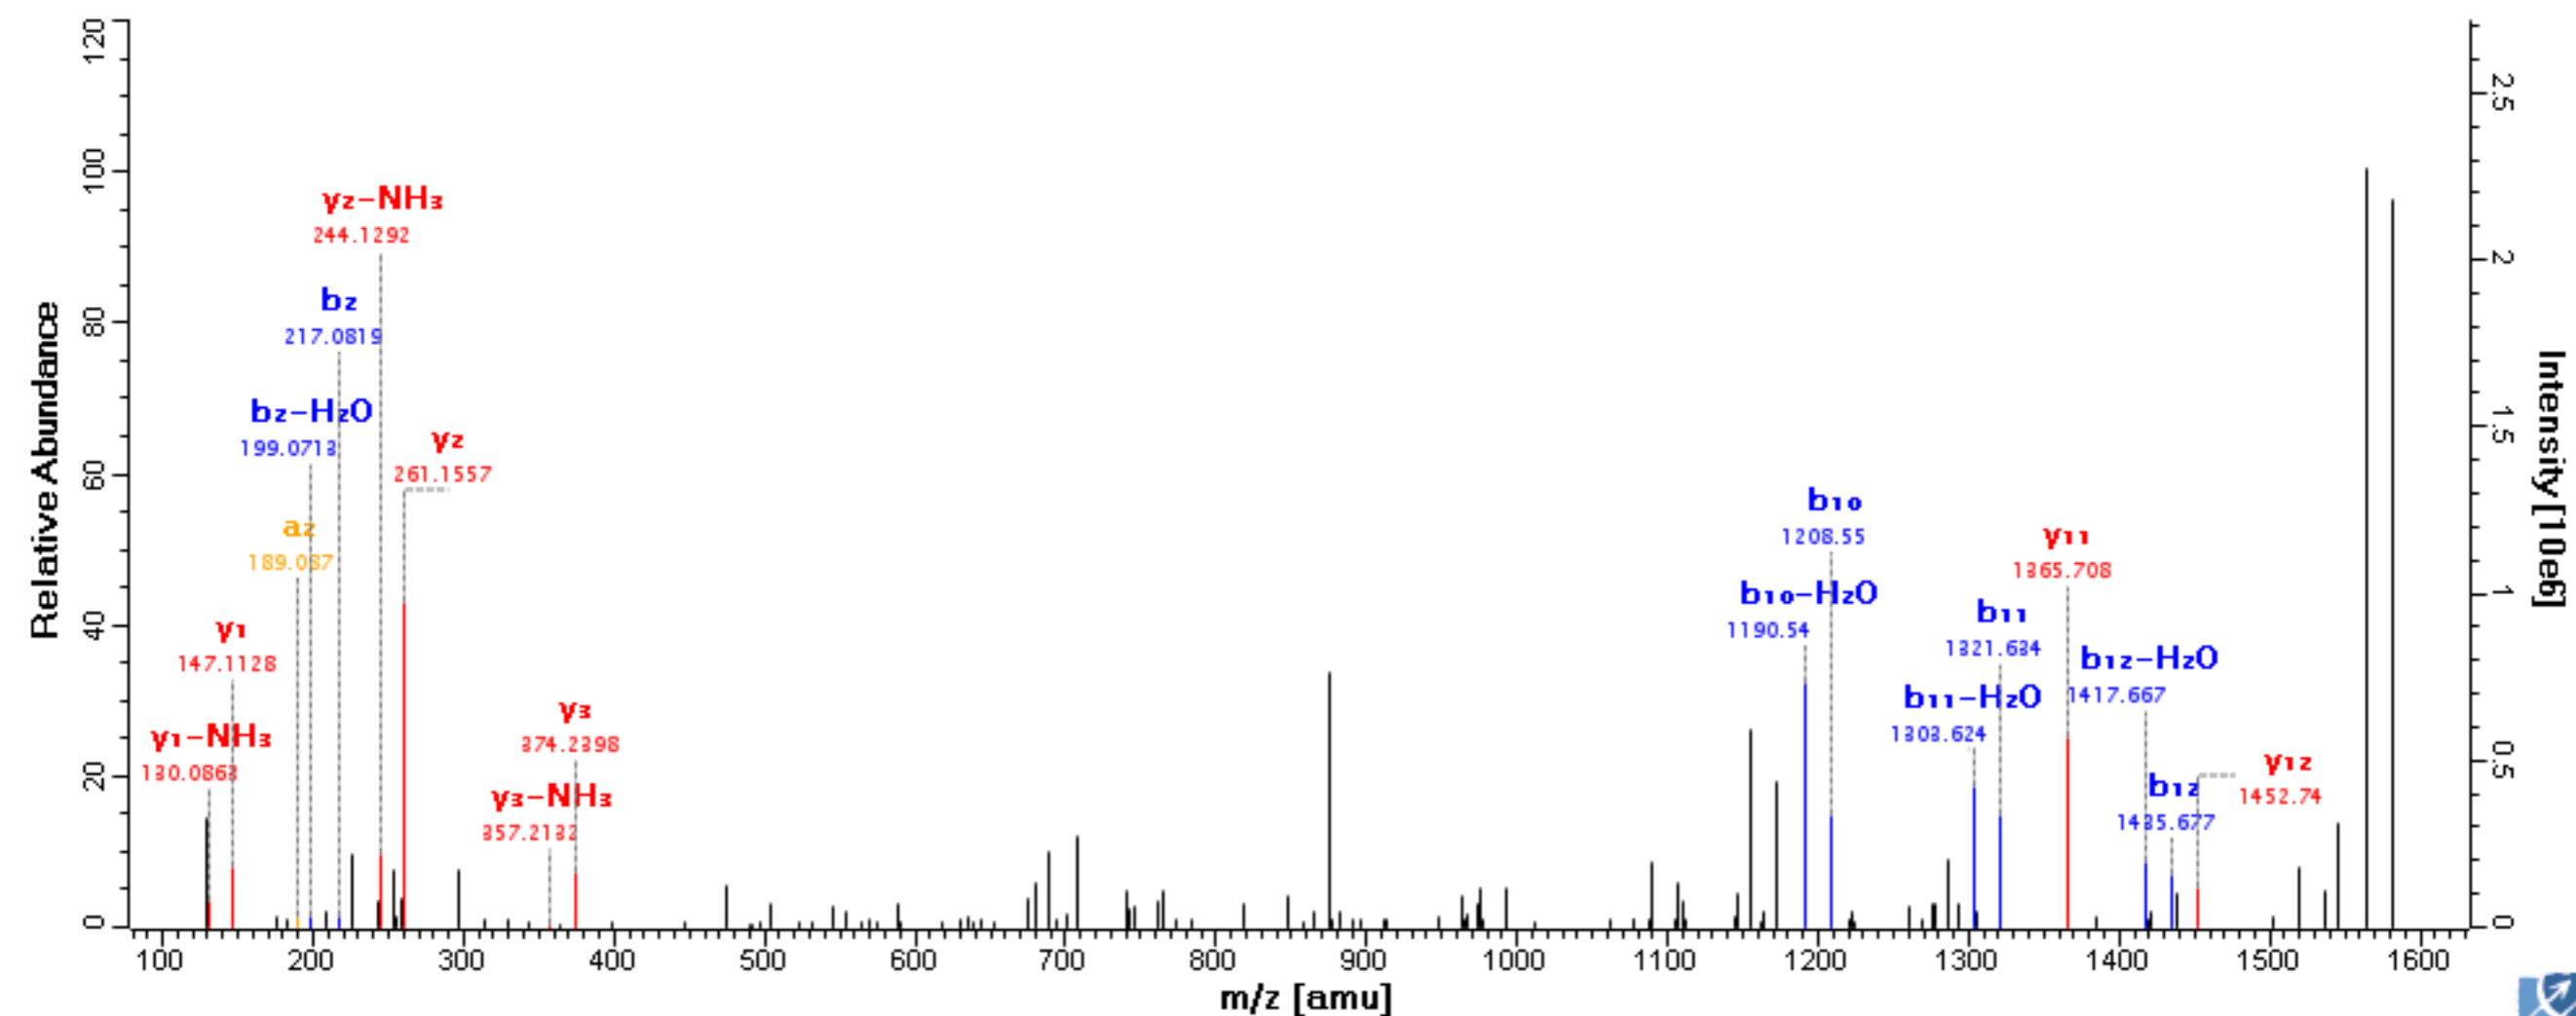

Source: Bibo\_20130531\_RM\_MSC07628\_1\_3  
 Scannumber: 17662  
 Protein: OGT; O15294-1; O15294; B4DTL6  
 Peptide Score: 102.73  
 Method: FTMS; HCD; 1

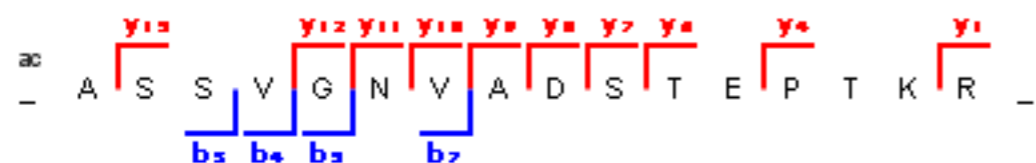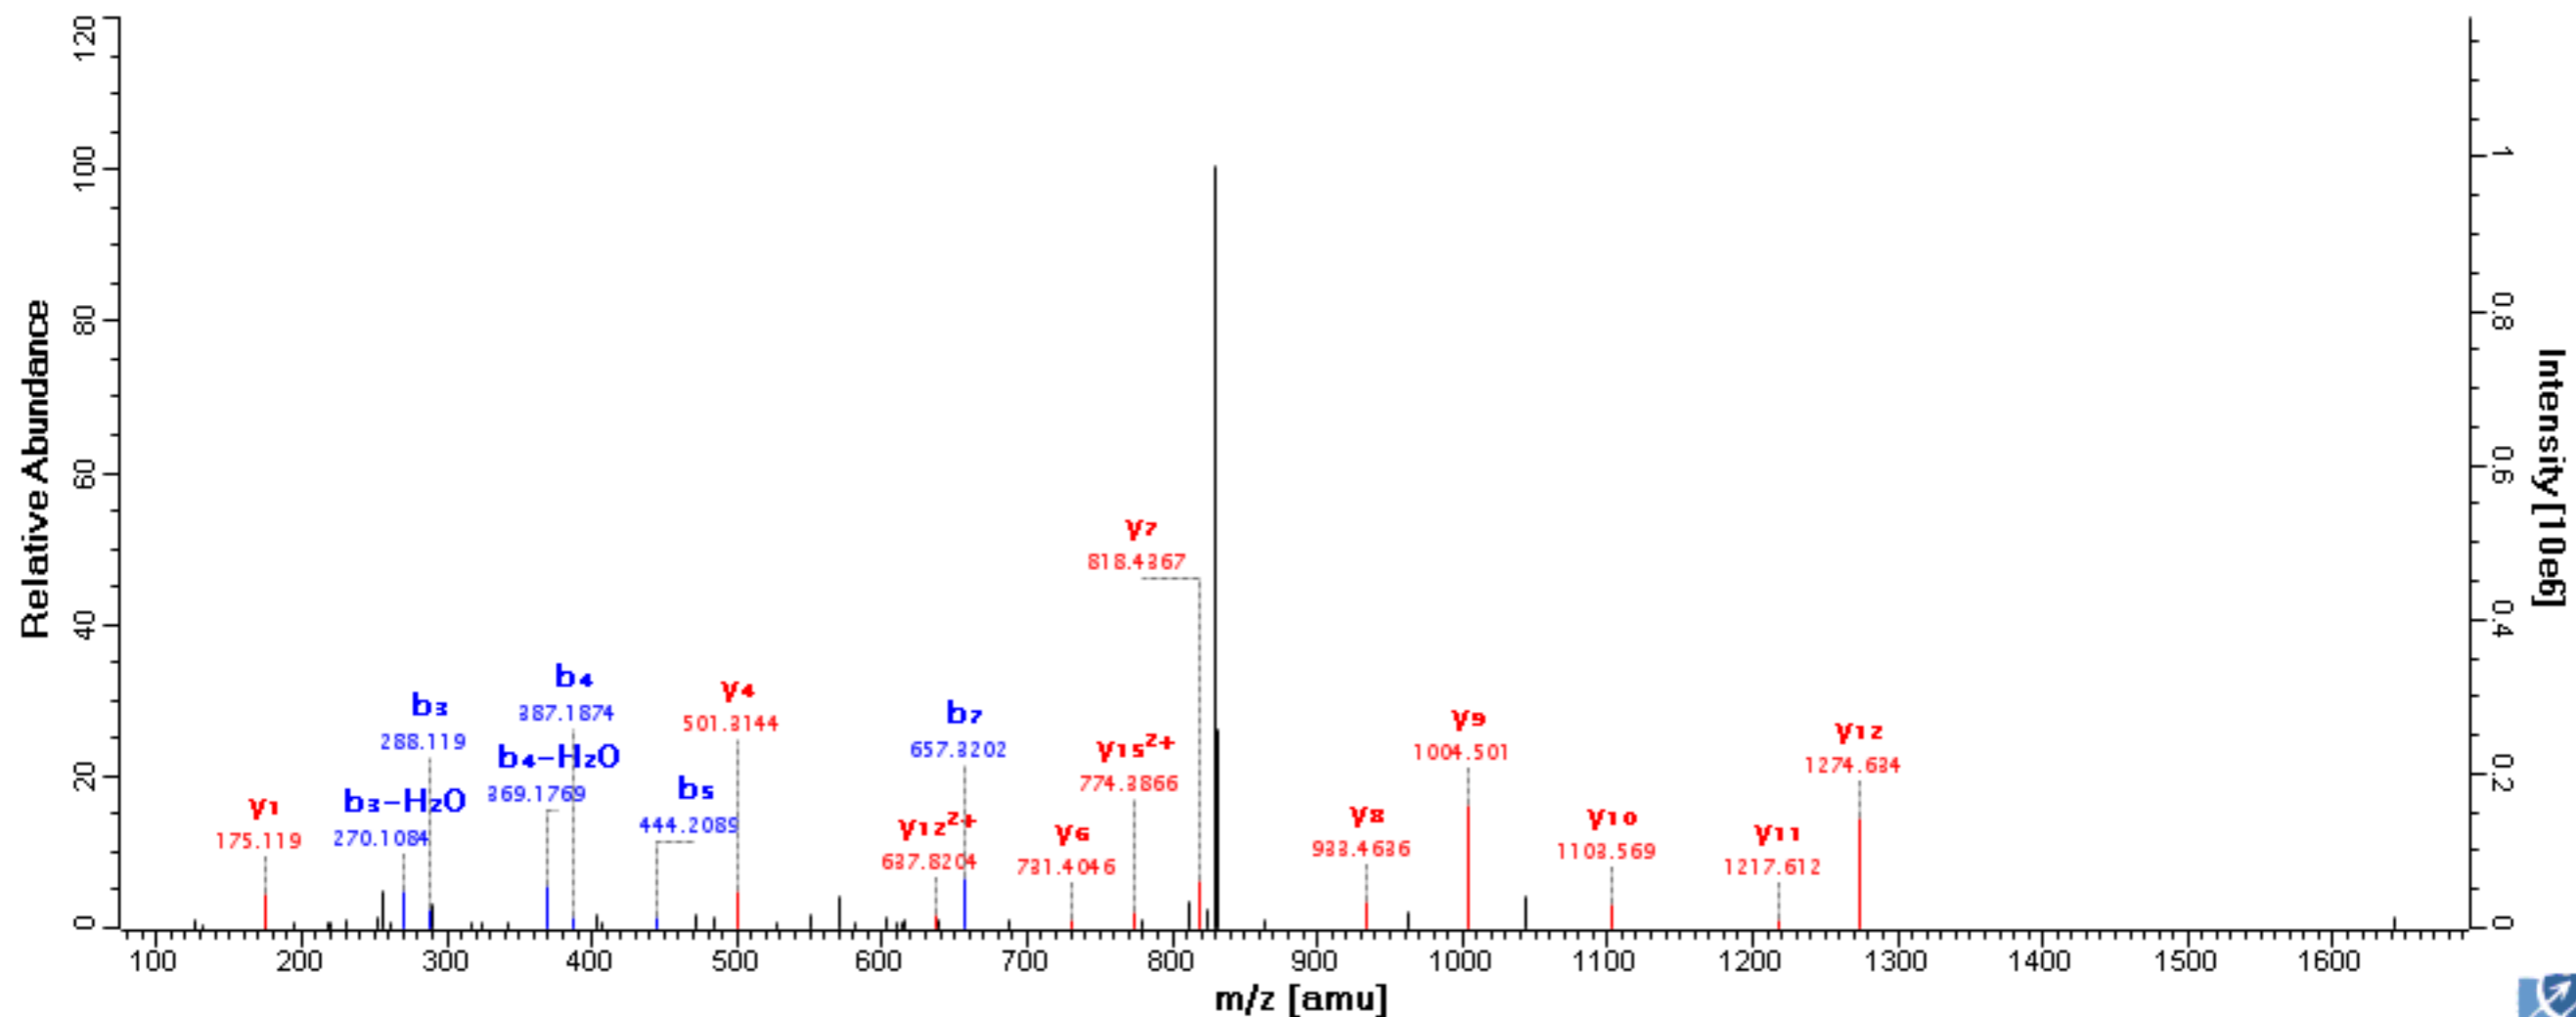

Source: Bibo\_20130531\_RM\_MSC07628\_1\_3

Scannumber: 17727

Protein: GNB2L1; HLC7; PIG21; D6REE5; P63244; E9KL35; D6R9L0; D6RAC2; D6R9Z1; D6RHH4; D6RDF4; B4DVD2; D6RFZ9; D6RF4; B4DWC6; D6RBD0; B4E0C3; E9PD14; D6RAU2; D6R909; D6RGK

Peptide Score: 120.12

Method: FTMS; HCD; 1

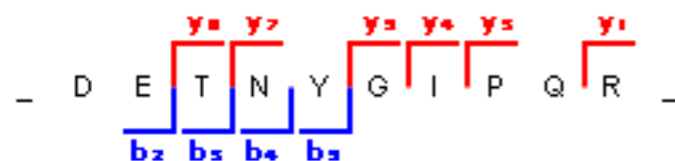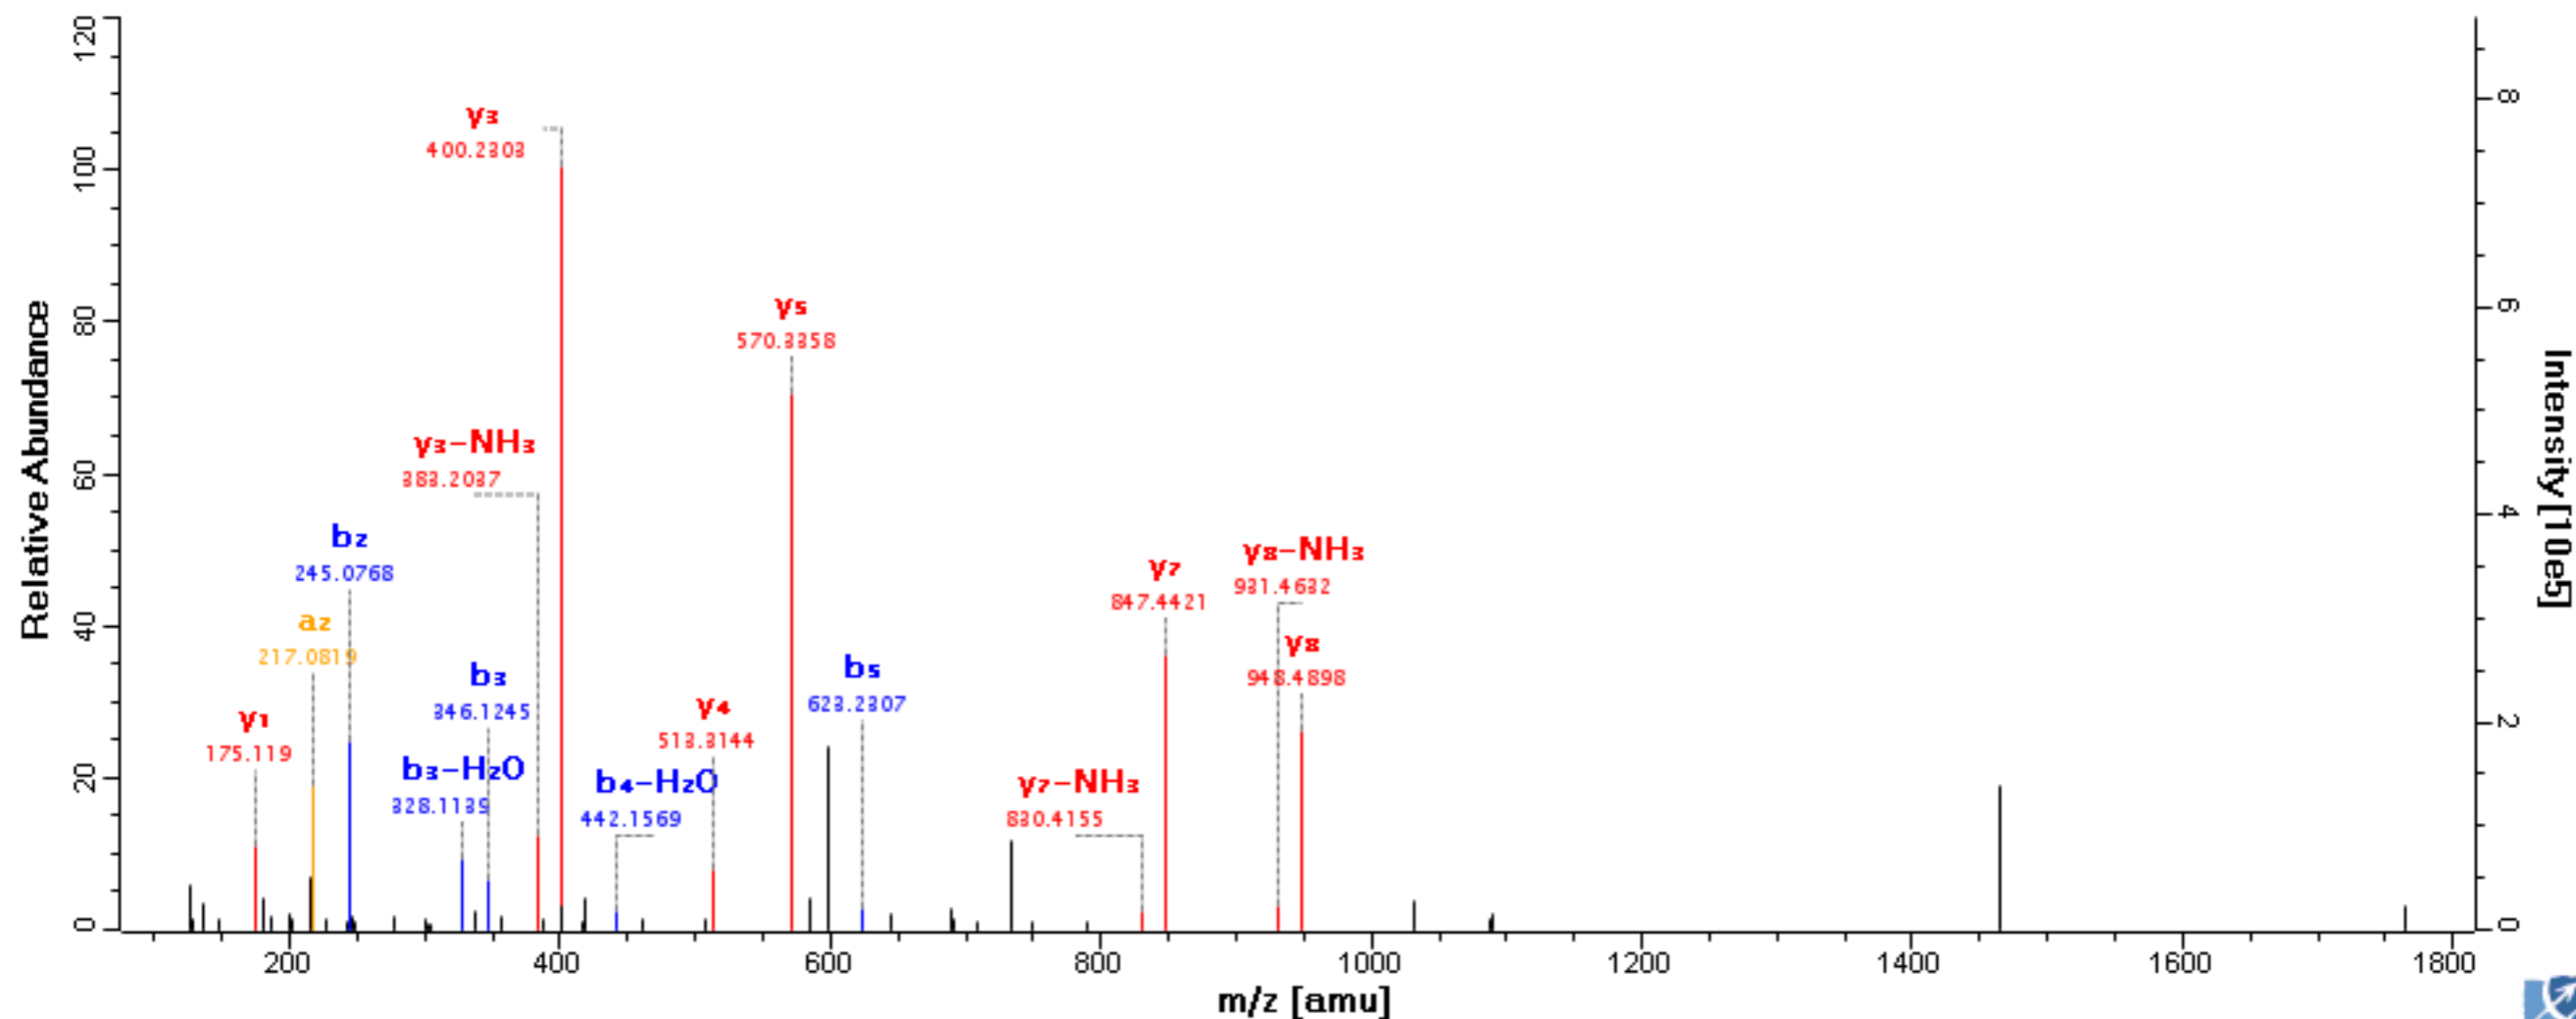

Source: Bibo\_20130531\_RM\_MSC07628\_1\_3  
 Scannumber: 19940  
 Protein: DLG7; DLGAP5; KIAA0008; DLG7; DLGAP5; hCG\_22118; DLG7; DLGAP5; KIAA0008; Q15398-2; Q15398; A8K732; B4DRM8; Q86T11; A8MTM6; B4DMI9; E7EP14; Q15398-1; Q15398  
 Peptide Score: 112.13  
 Method: FTMS; HCD; 1

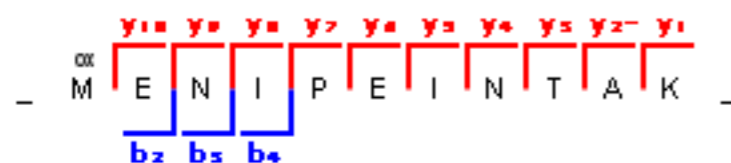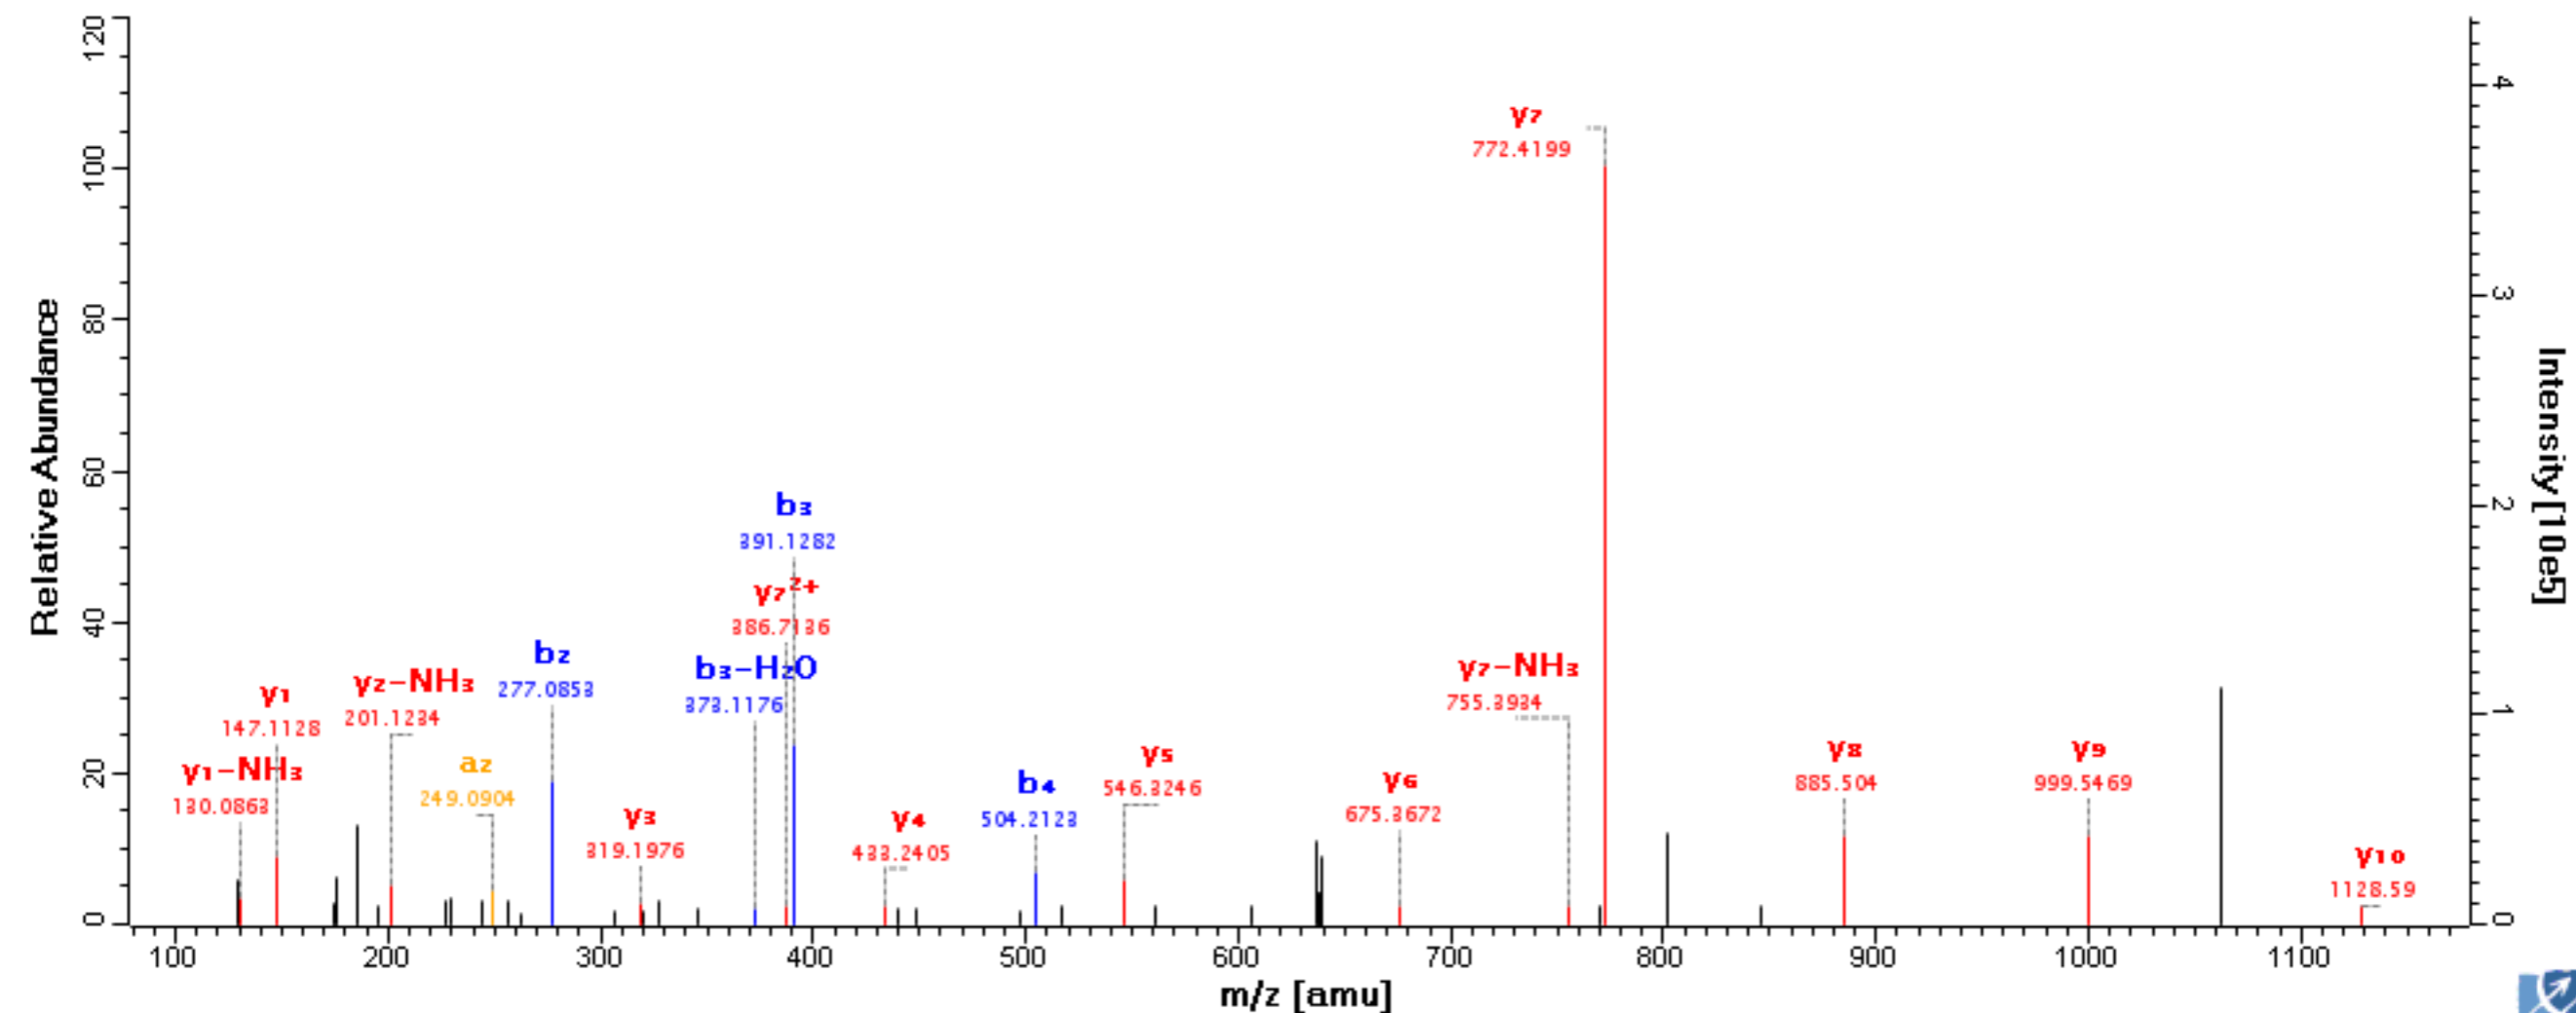

Source: Bibo\_20130531\_RM\_MSC07628\_1\_3  
 Scannumber: 20021  
 Protein: AIK2; AIM1; ARK2; AURKB; STK12; aurkb; aurkb-sv1; aurkb-sv2; Q96GD4; B2RC06; C7G533; C7G534; C7G535  
 Peptide Score: 106.01  
 Method: FTMS; HCD; 1

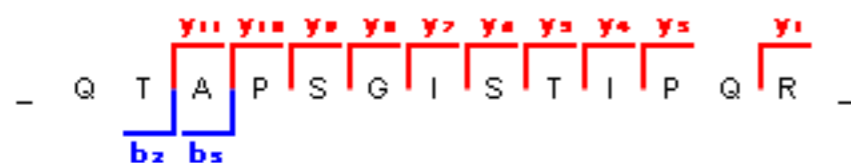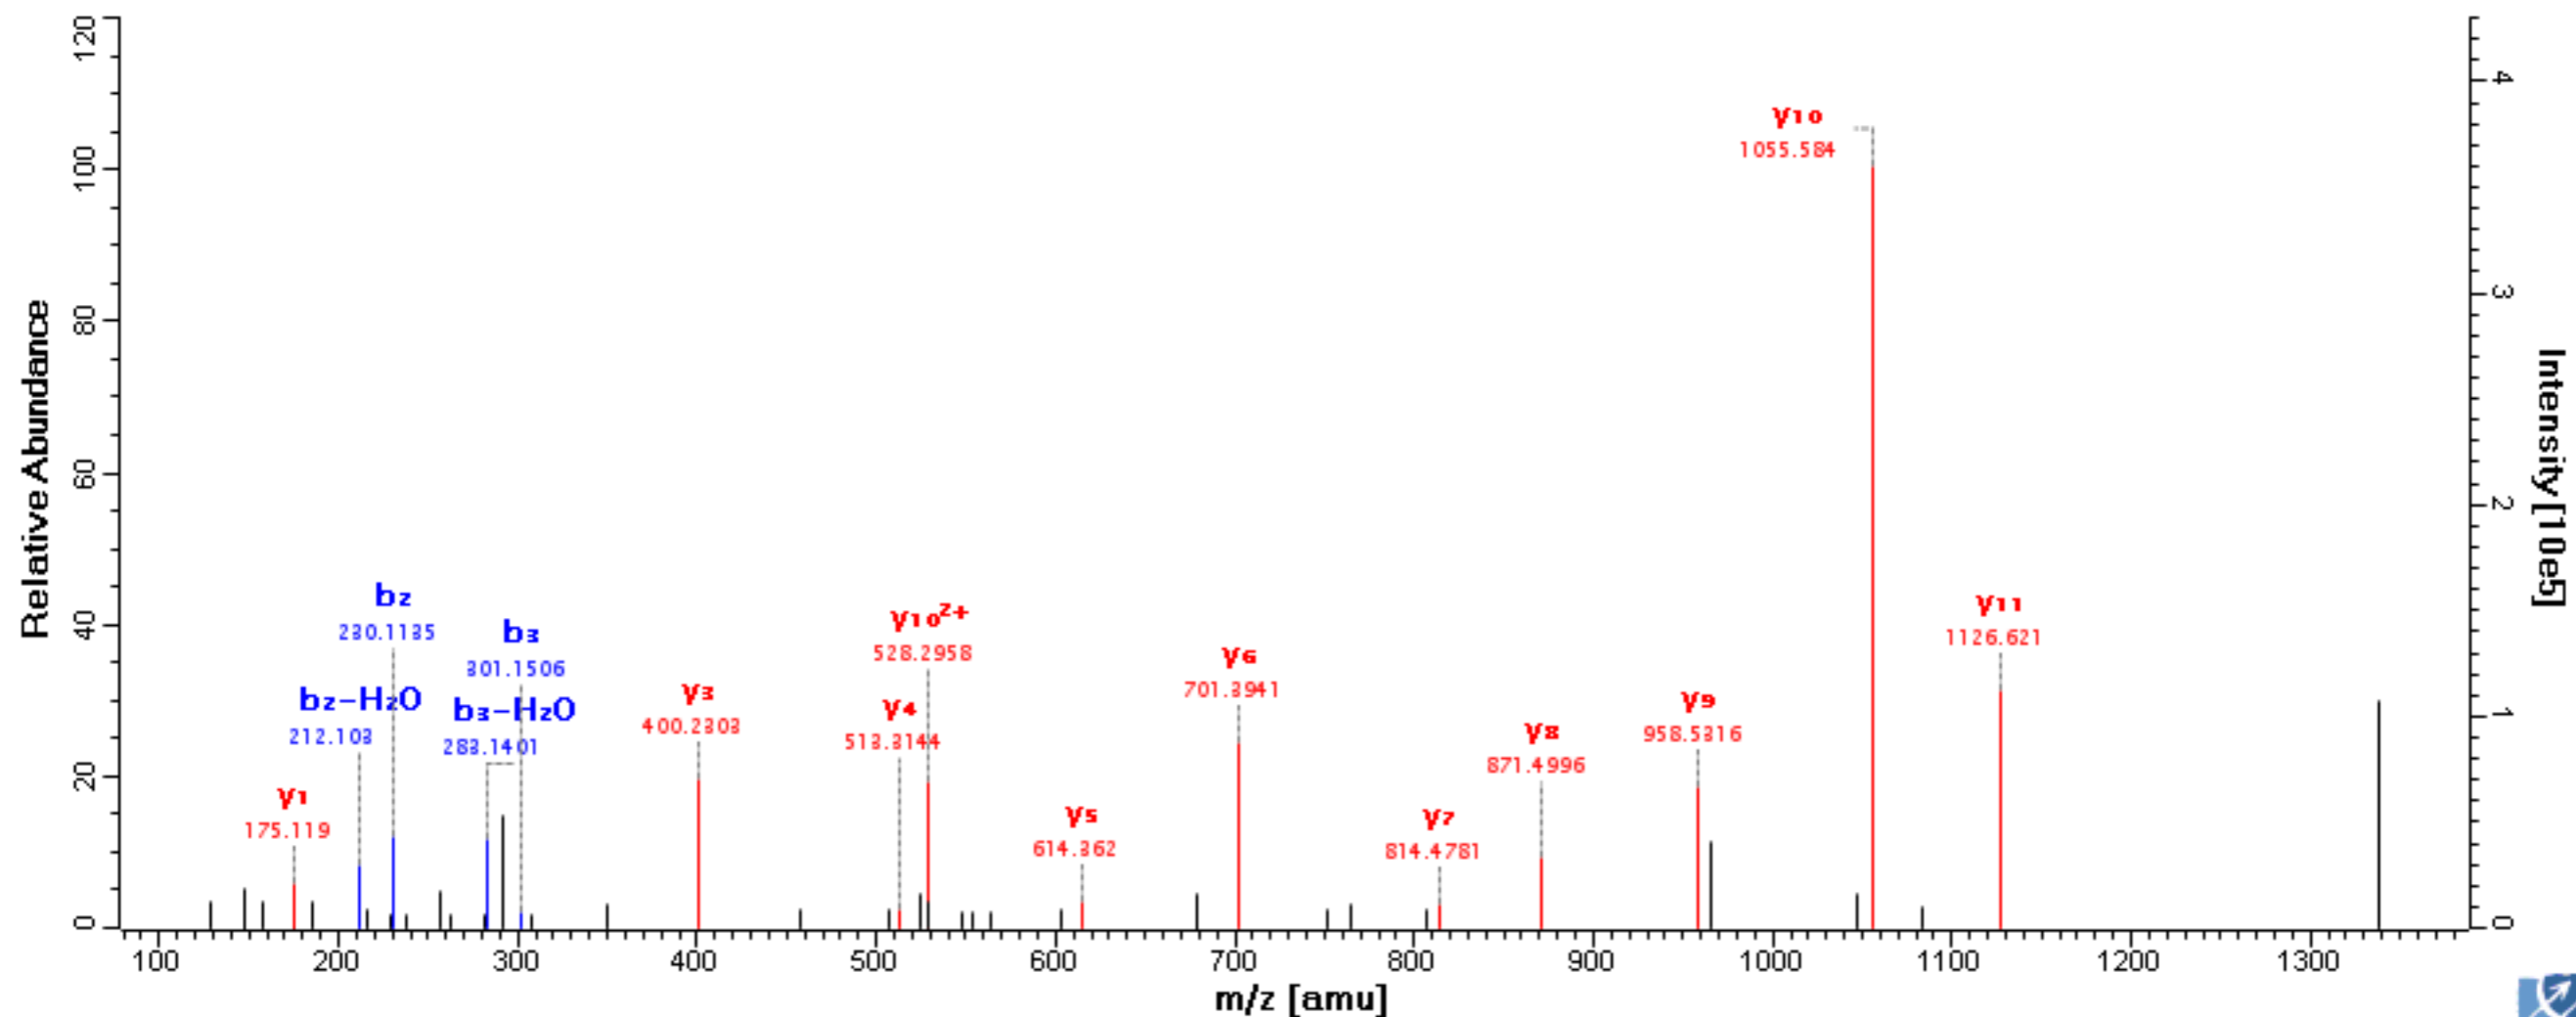

Source: Bibo\_20130531\_RM\_MSC07628\_1\_3  
 Scannumber: 20373  
 Protein: RP11-173B14.3-003; UCHL3; UCHL3; E9P8F1; Q5TBK7; P15374  
 Peptide Score: 86.31  
 Method: FTMS; HCD; 1

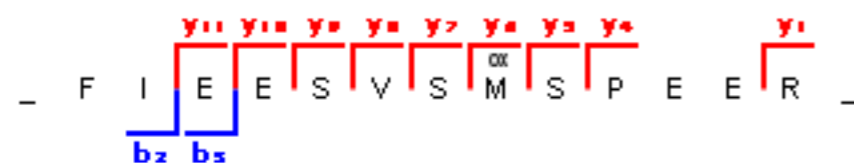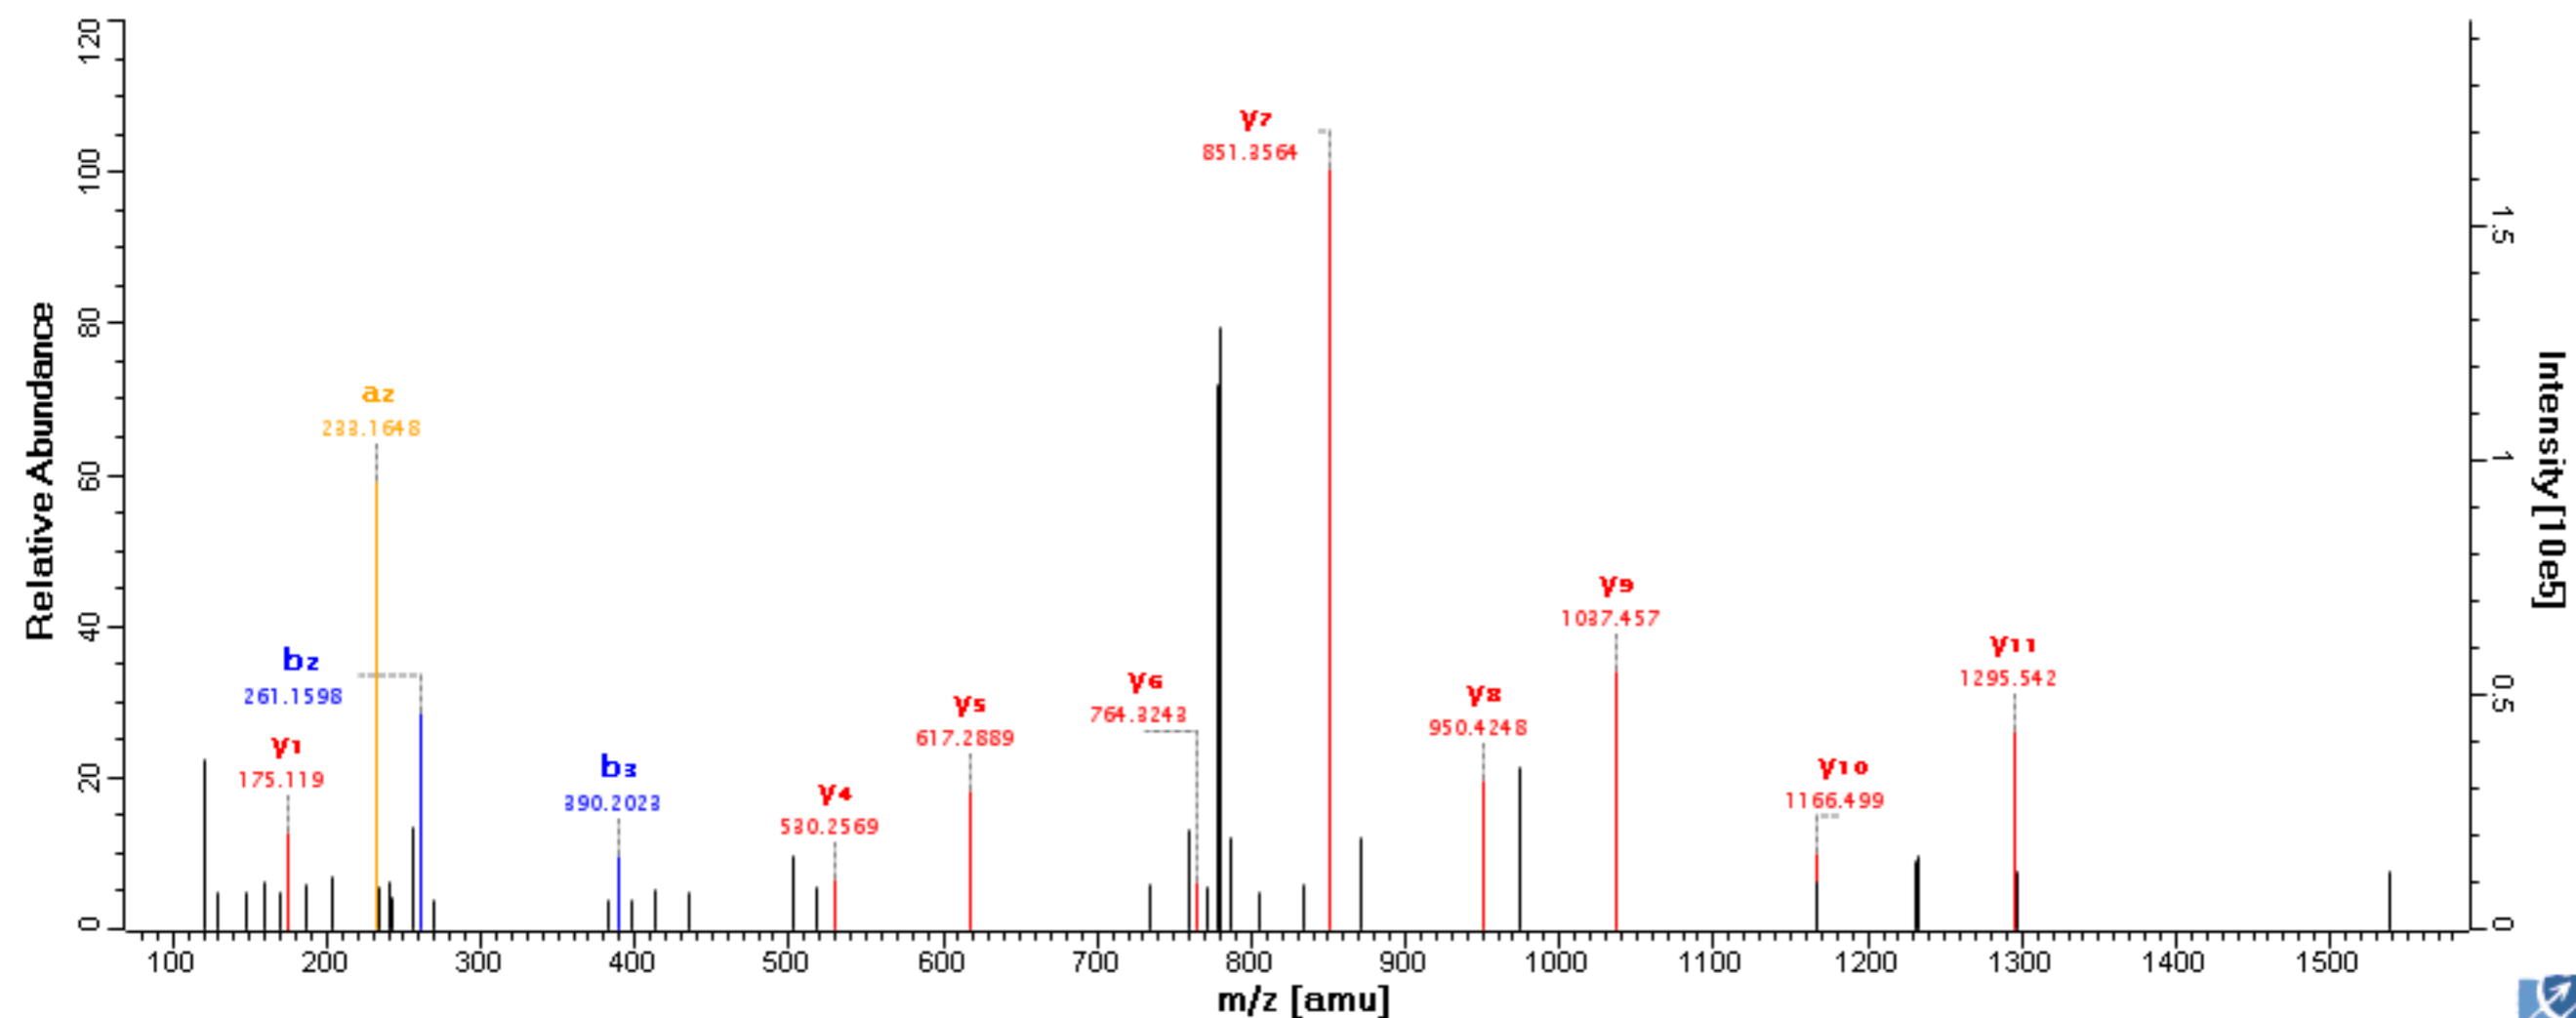

Source: Bibo\_20130531\_RM\_MSC07628\_1\_3  
 Scannumber: 20391  
 Protein: C20orf18; RBCK1; RNF54; UBCE7IP3; XAP3; XAP4; C20orf18; RBCK1; RNF54; UBCE7IP3; XAP3; XAP4; RBCK1; RP5-852M4.4-007; C20orf18; RBCK1; RNF54; UBCE7IP3; XAP3; XAP4; Q9BYM8  
 Peptide Score: 70.98  
 Method: FTMS; HCD; 1

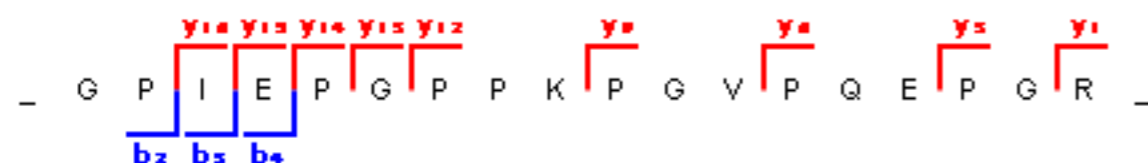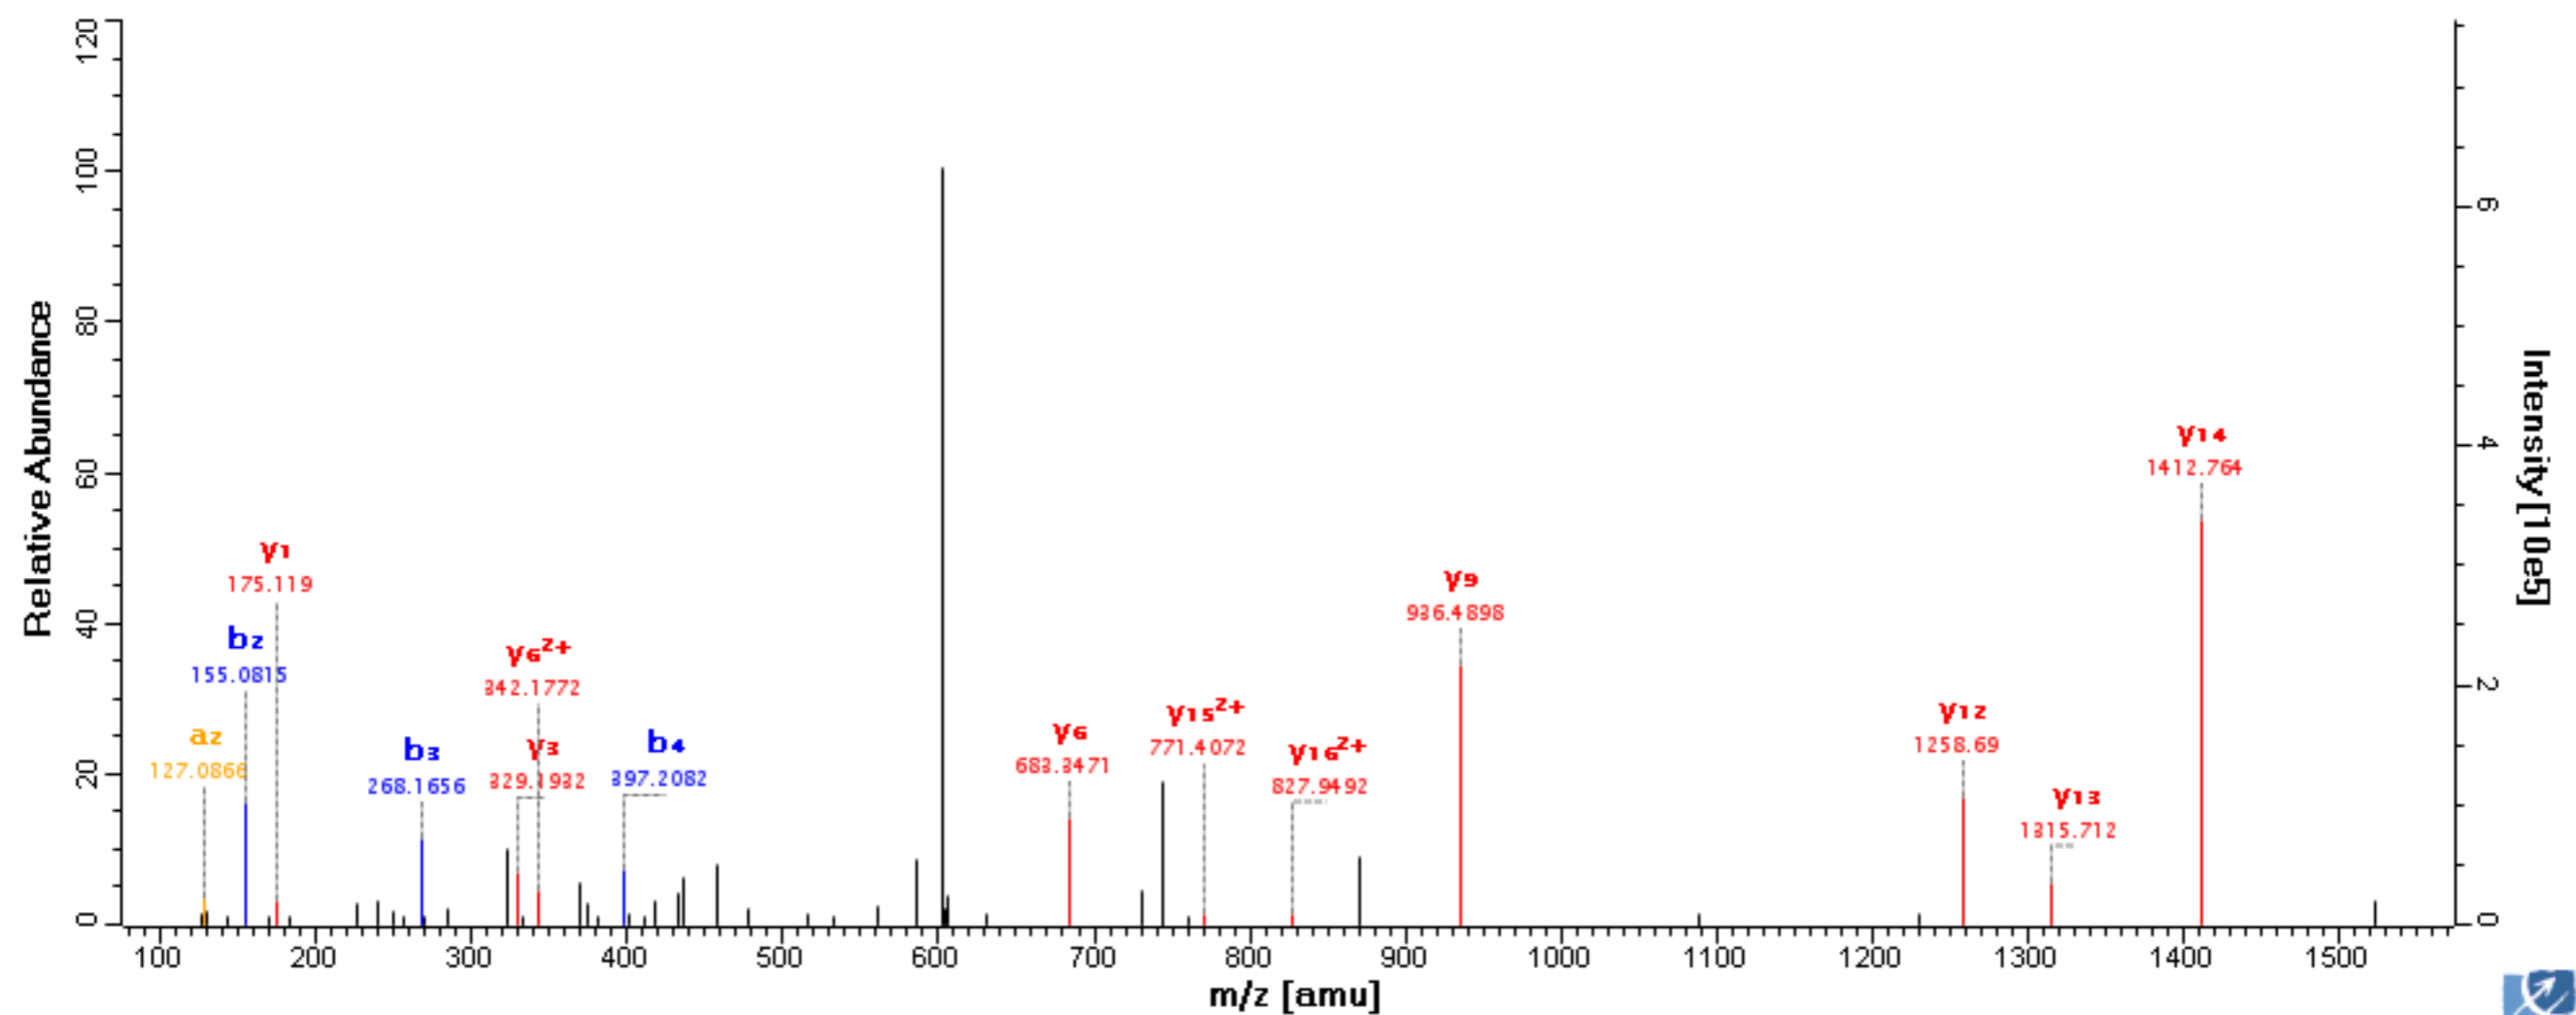

Source: Bibo\_20130531\_RM\_MSC07628\_1\_3

Scannumber: 20593

Protein: NAP1L1; NRP; NAP1L4; NAP1L4b; NAP1L4; NAP2; hCG\_2015037; NAP1L1; NAP1L4; NAP1L4; NAP1L4; P55209; A8CGI3; A8MZ22; B2R6J4; B4DS05; B7ZAC7; B7ZAK9; B7ZB83; B3KNT8; B7Z22

Peptide Score: 84.21

Method: FTMS; HCD; 1

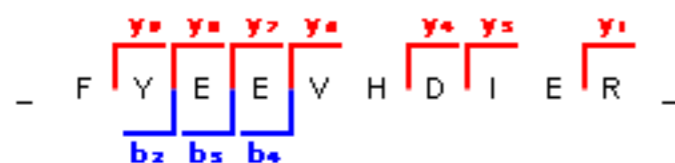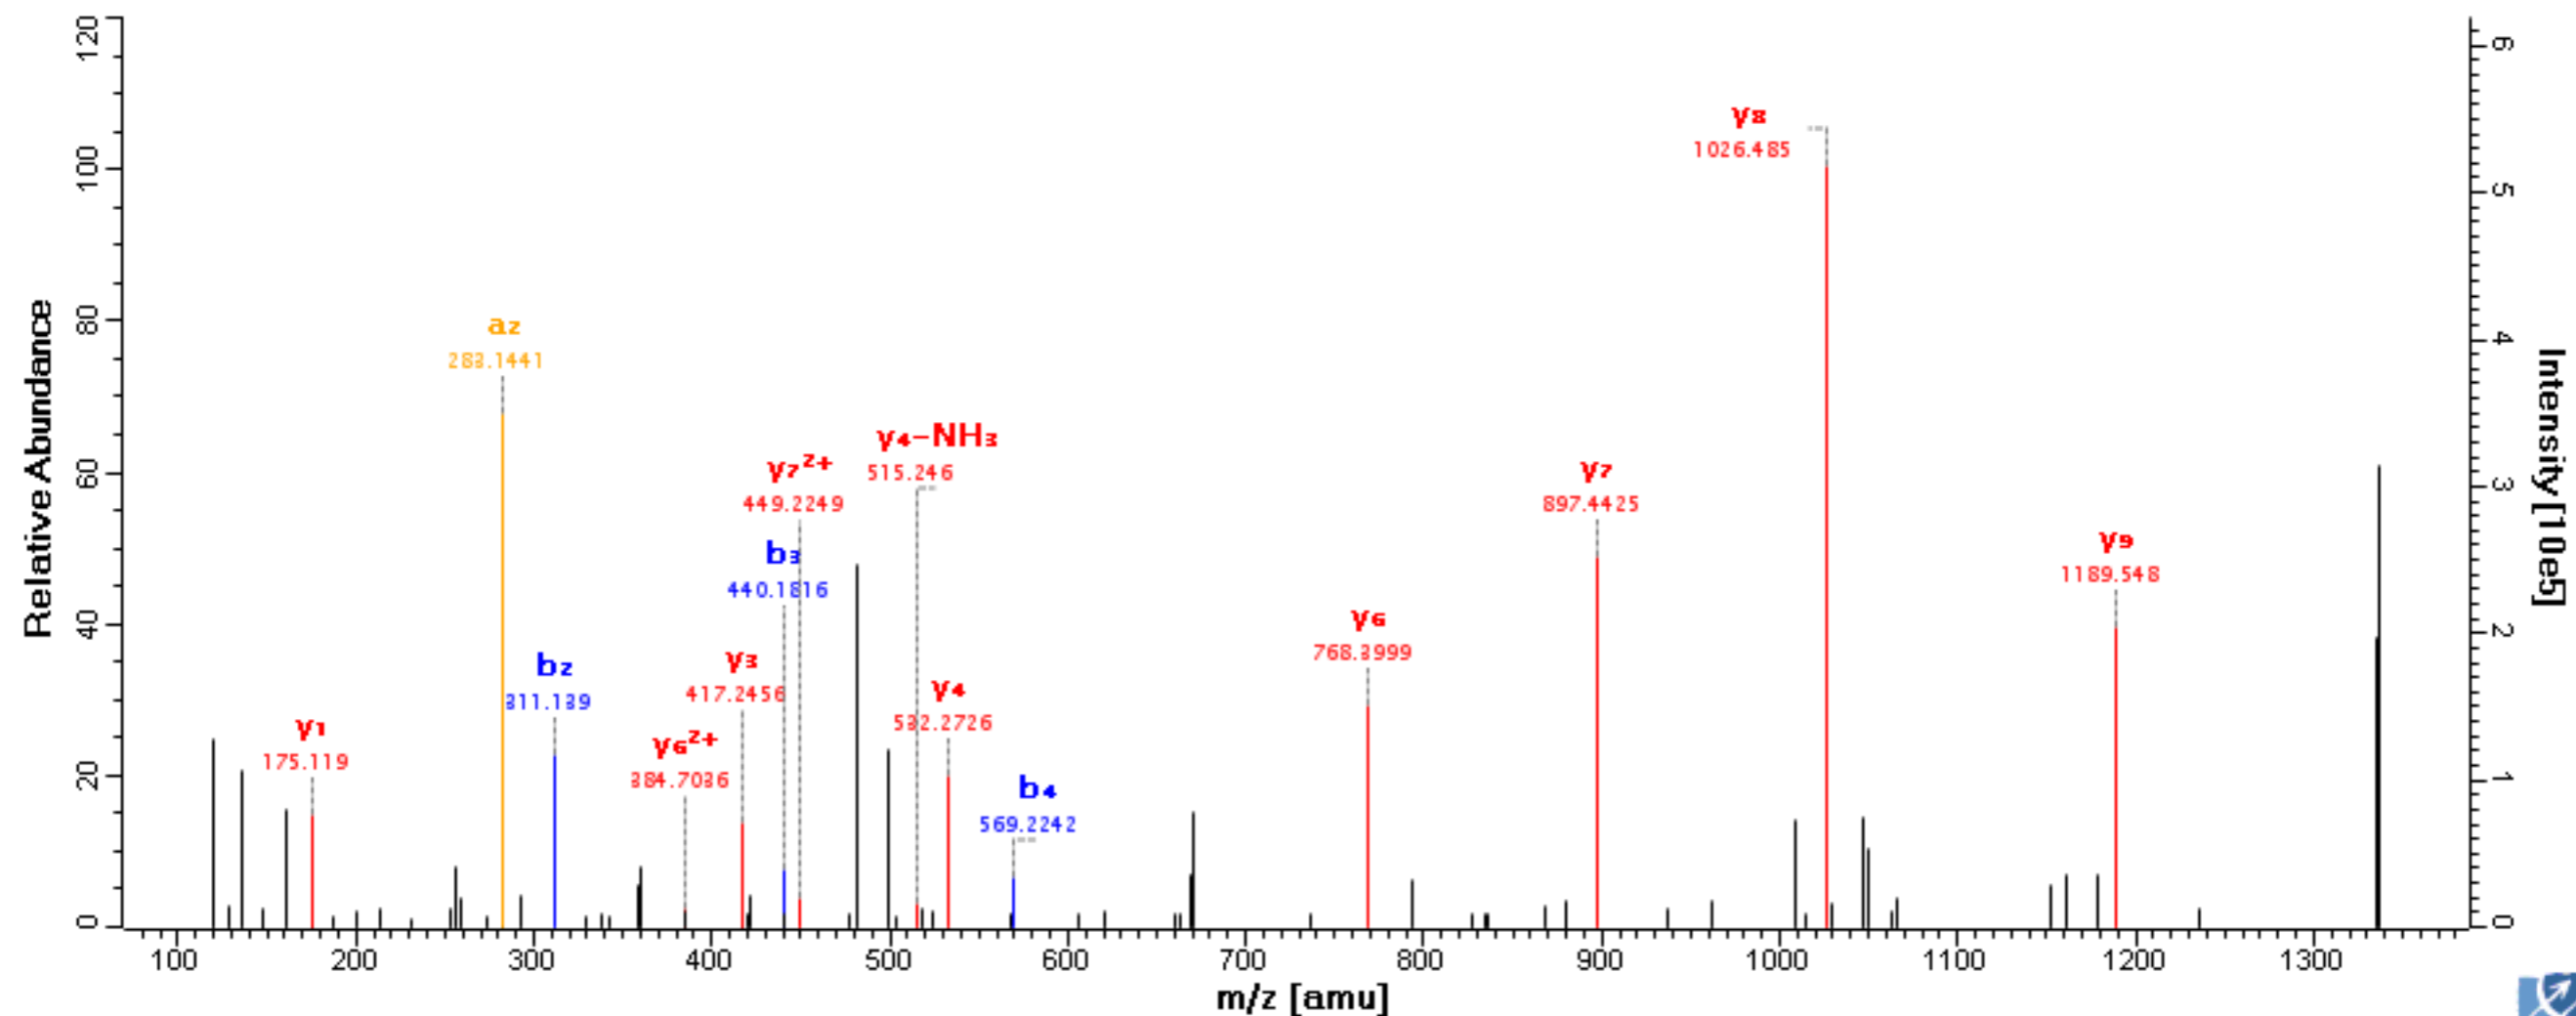

Source: Bibo\_20130531\_RM\_MSC07628\_1\_3

Scannumber: 21756

Protein: EPN2; KIAA1065; EPN2; KIAA1065; hCG\_1811979; EPN2; KIAA1065; EPN2; O95208-1; O95208; B3KMB3; O95208-2; O95208; B7ZKM5; E9PBC2; Q52LD0; O95208-3; O95208; E7EMC3; B7

Peptide Score: 47.55

Method: FTMS; HCD; 1

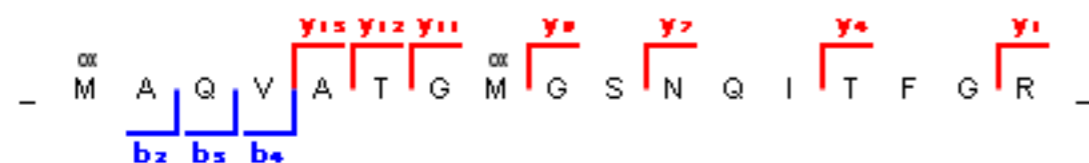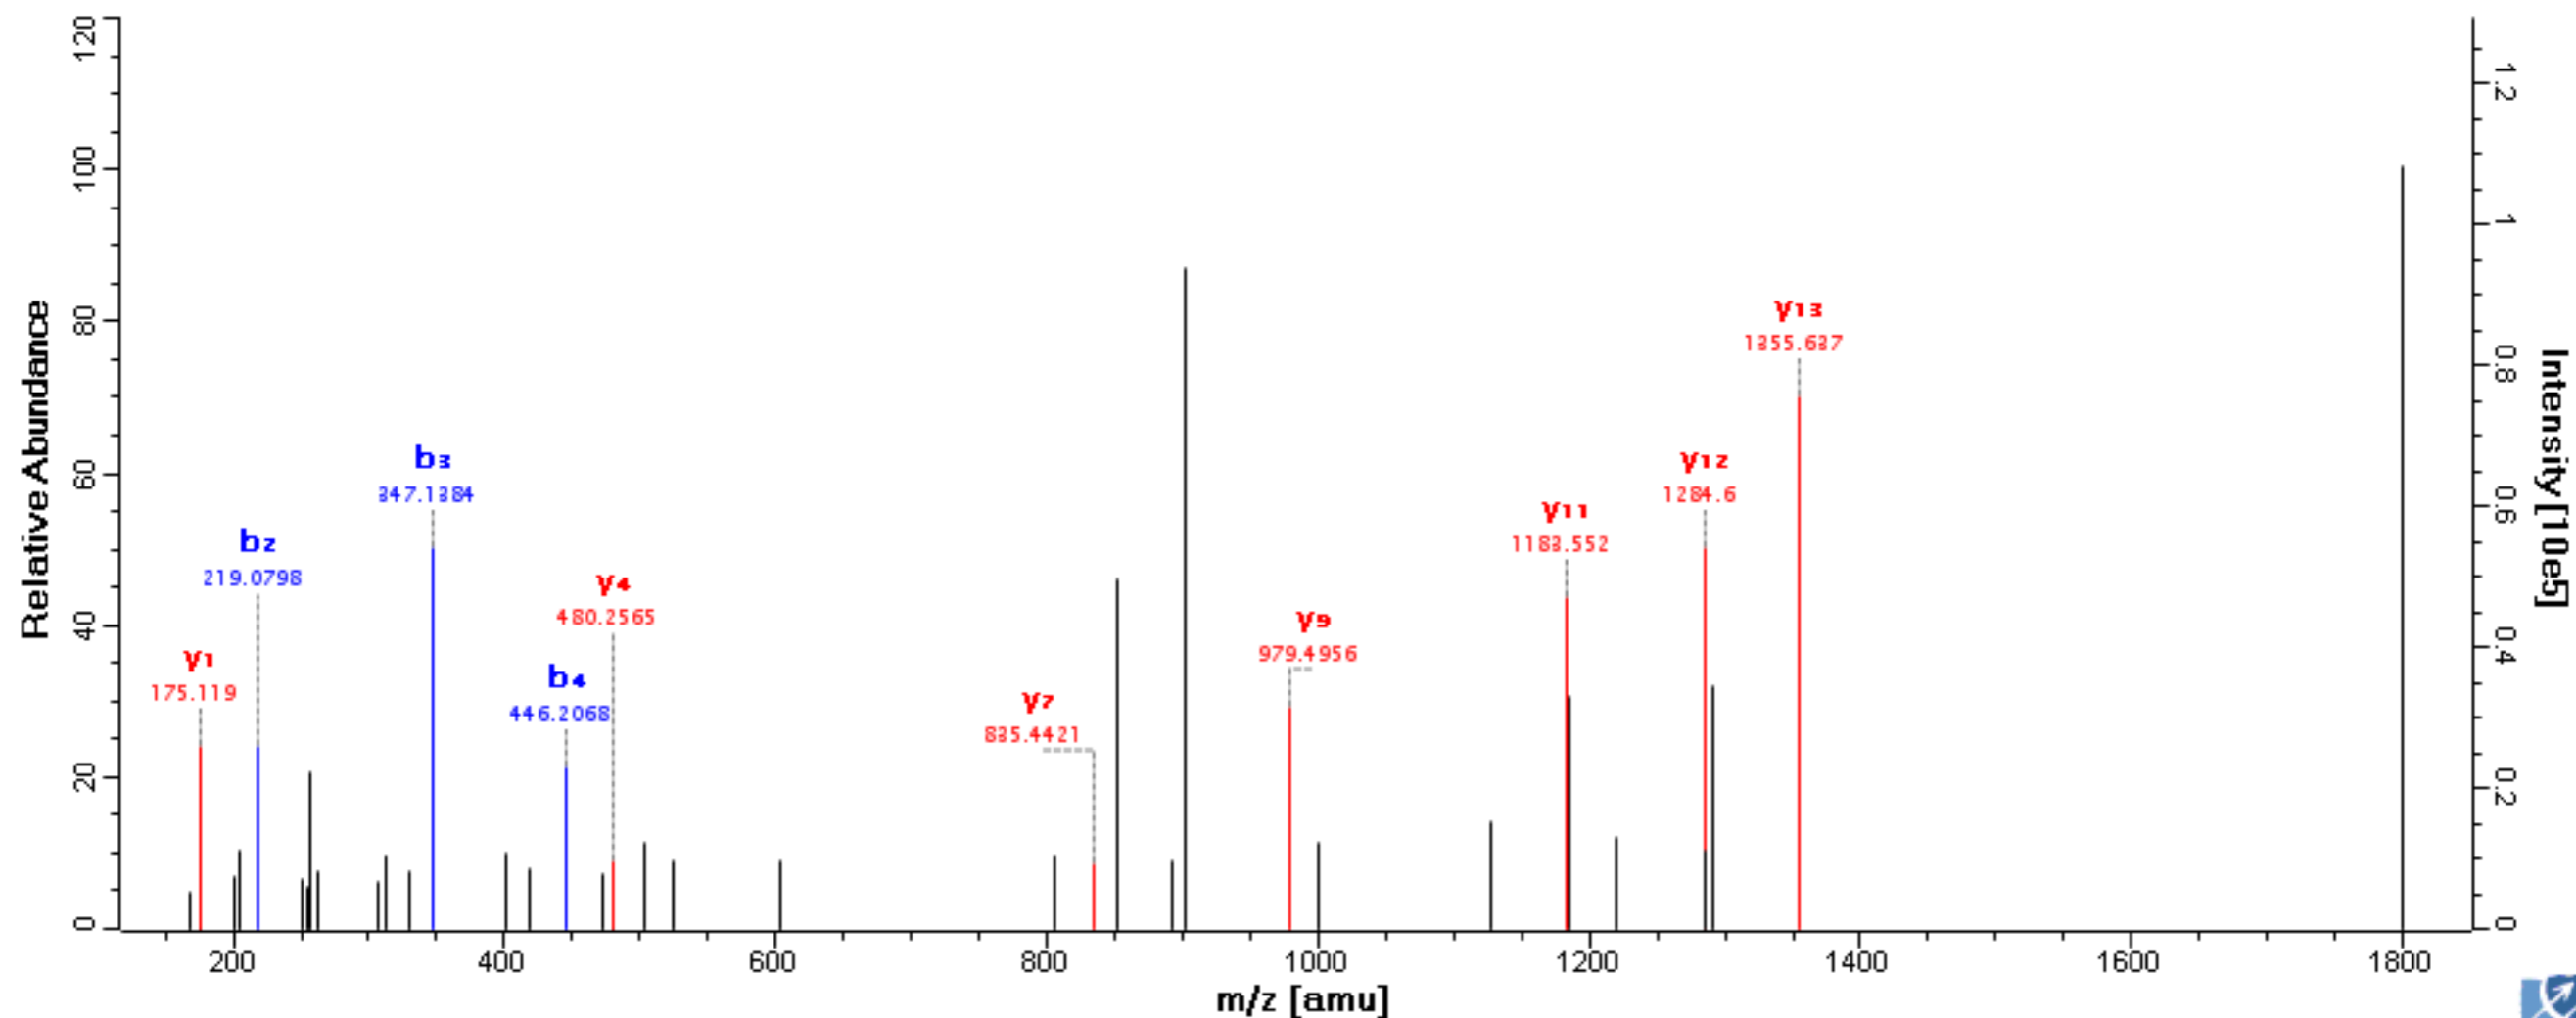

Source: Bibo\_20130531\_RM\_MSC07628\_1\_3  
 Scannumber: 24687  
 Protein: CRY; CRYL1; CRY; CRYL1; Q9Y2S2-1; Q9Y2S2; Q9Y2S2-2; Q9Y2S2  
 Peptide Score: 67.46  
 Method: FTMS; HCD; 1

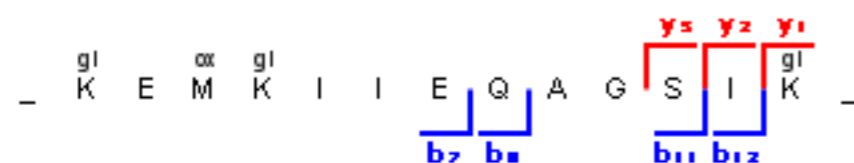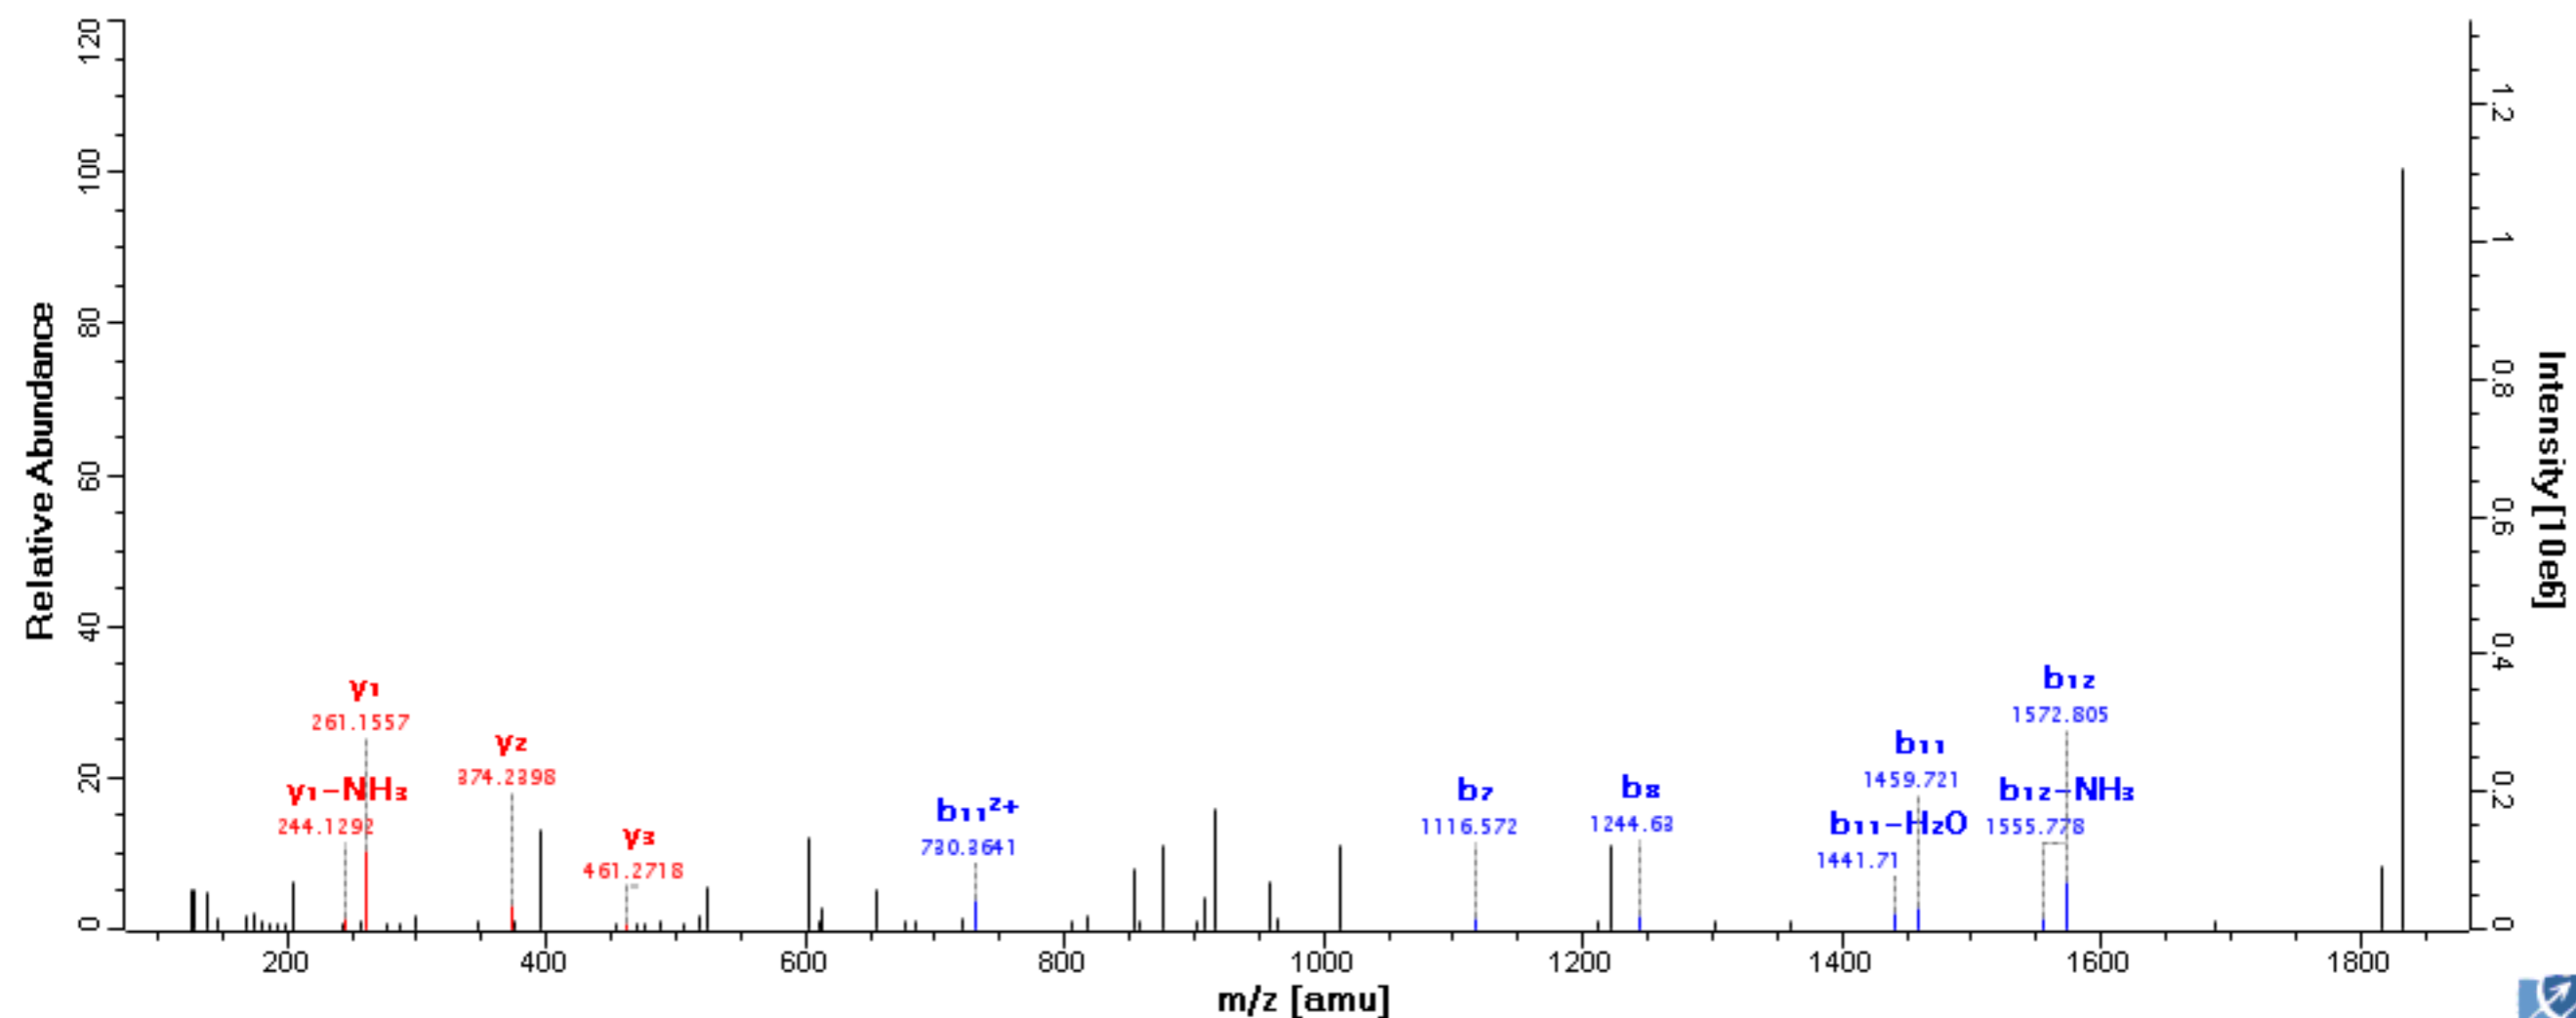

Source: Bibo\_20130531\_RM\_MSC07628\_1\_3  
 Scannumber: 25009  
 Protein: KIAA0886; MyO43; NOGO; RTN4; SP1507; Nbla10545; KIAA0886; MyO43; NOGO; RTN4; SP1507; KIAA0886; MyO43; NOGO; RTN4; SP1507; hCG\_1784307; RTN4; Q9NQC3-1; Q9NQC3; B4  
 Peptide Score: 100.69  
 Method: FTMS; HCD; 1

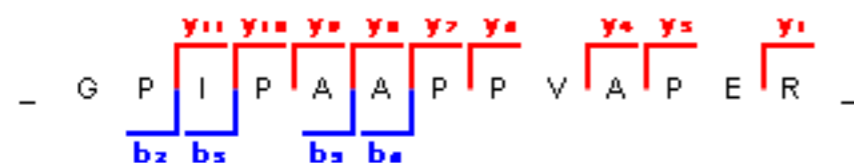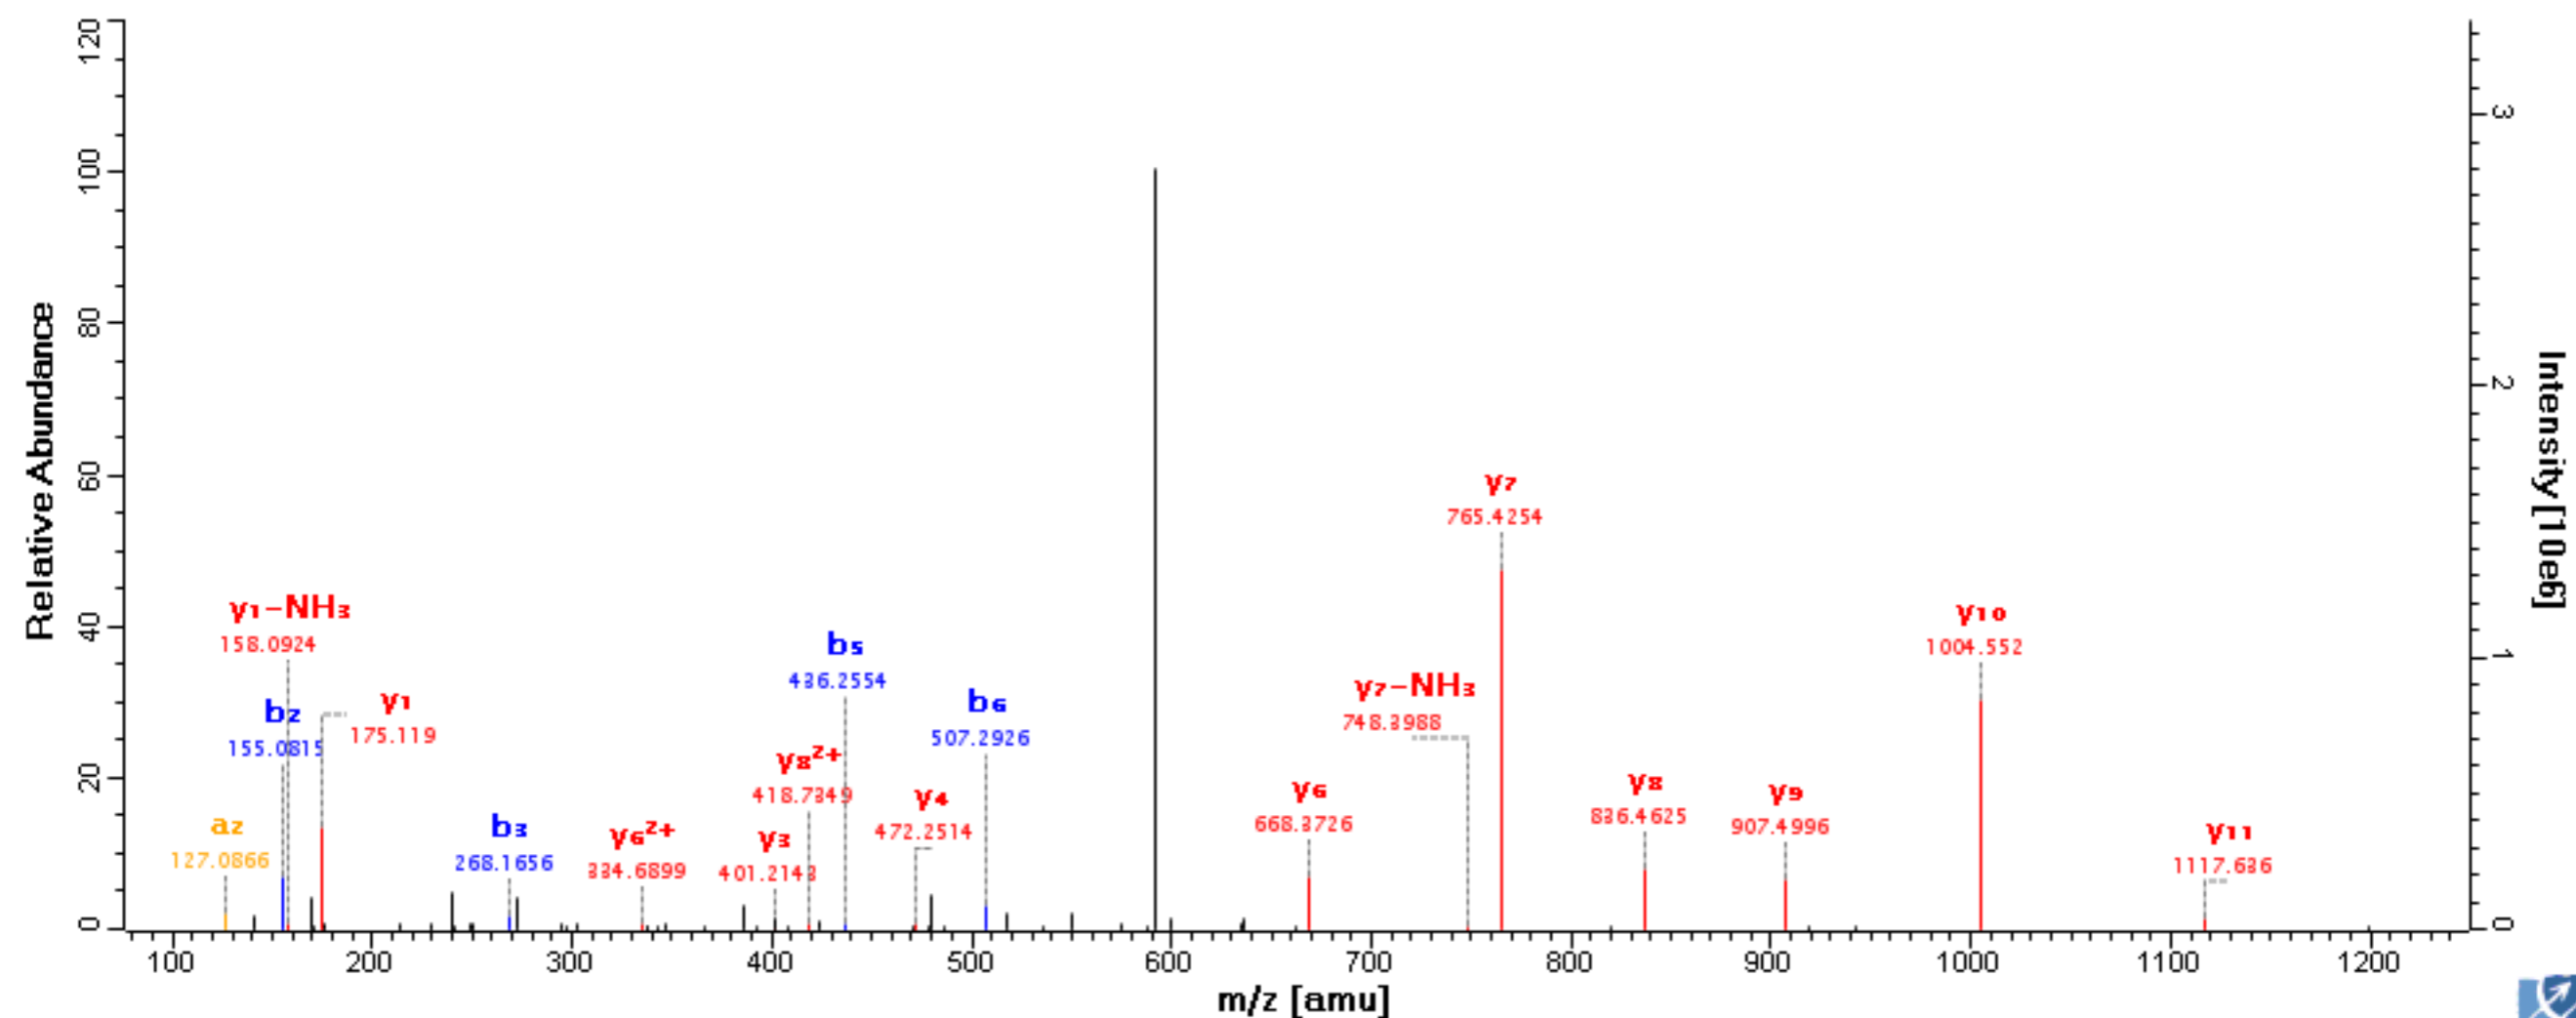

Source: Bibo\_20130531\_RM\_MSC07628\_1\_3  
 Scannumber: 25695  
 Protein: ARI; ARIH1; HUSSY-27; MOP6; UBCH7BP; Q9Y4X5  
 Peptide Score: 100.19  
 Method: FTMS; HCD; 1

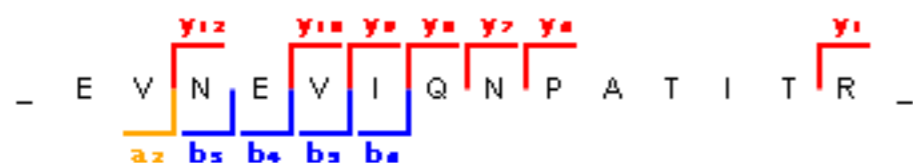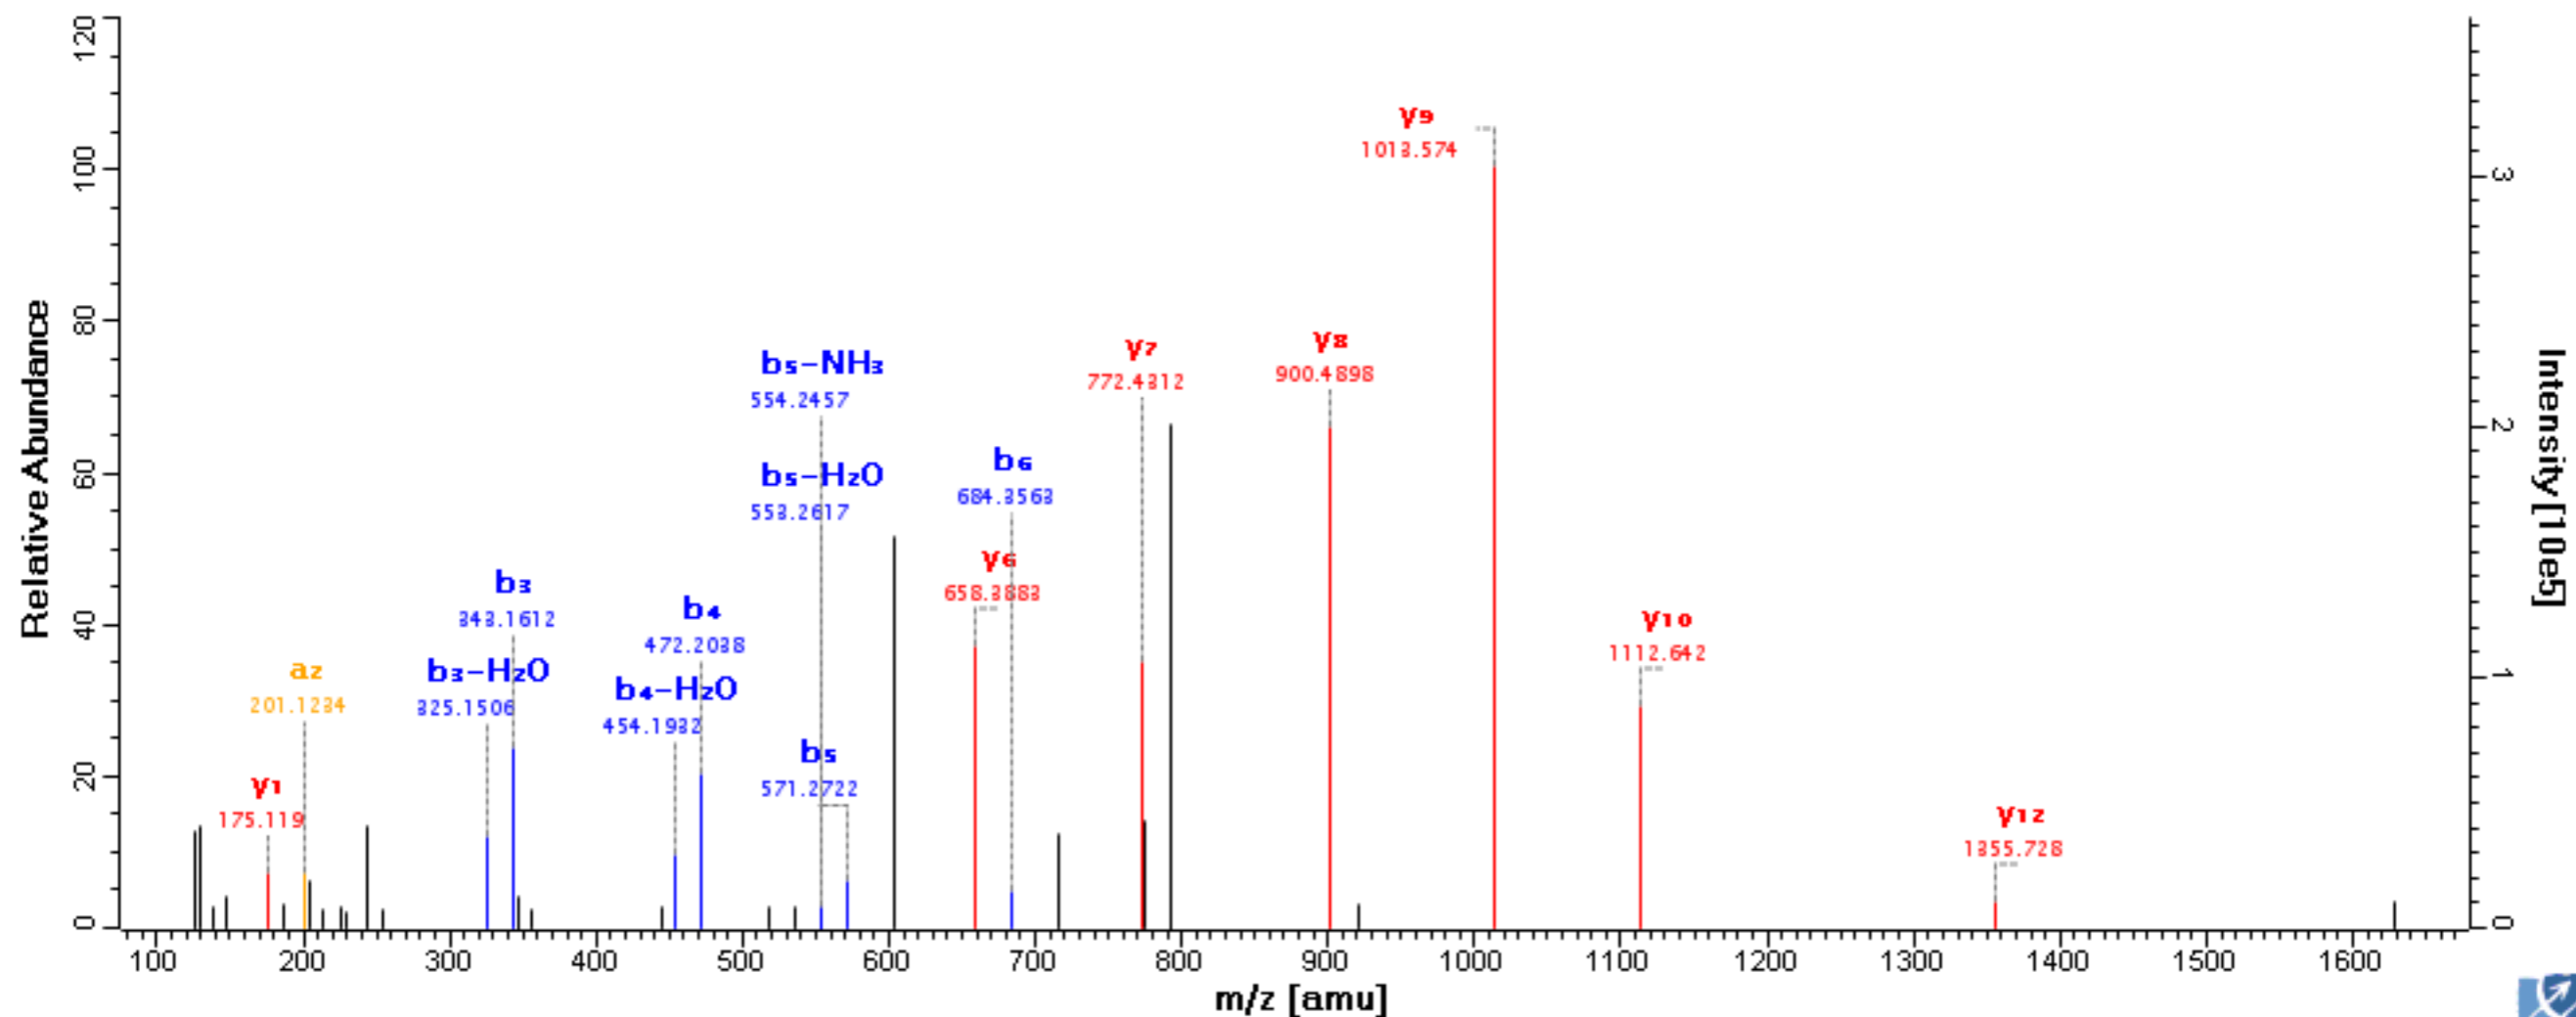

Source: Bibo\_20130531\_RM\_MSC07628\_1\_3  
 Scannumber: 25951  
 Protein: PARP10; B4E0C4; E9PNI7; Q96K72; Q53GL7; A2RUM0; B3KY29; E9PK67  
 Peptide Score: 99.5  
 Method: FTMS; HCD; 1

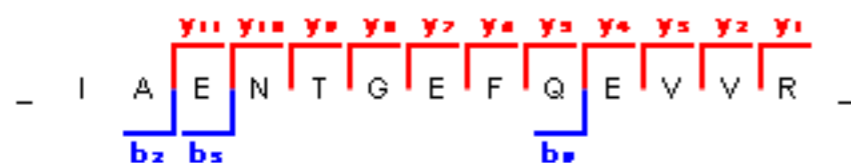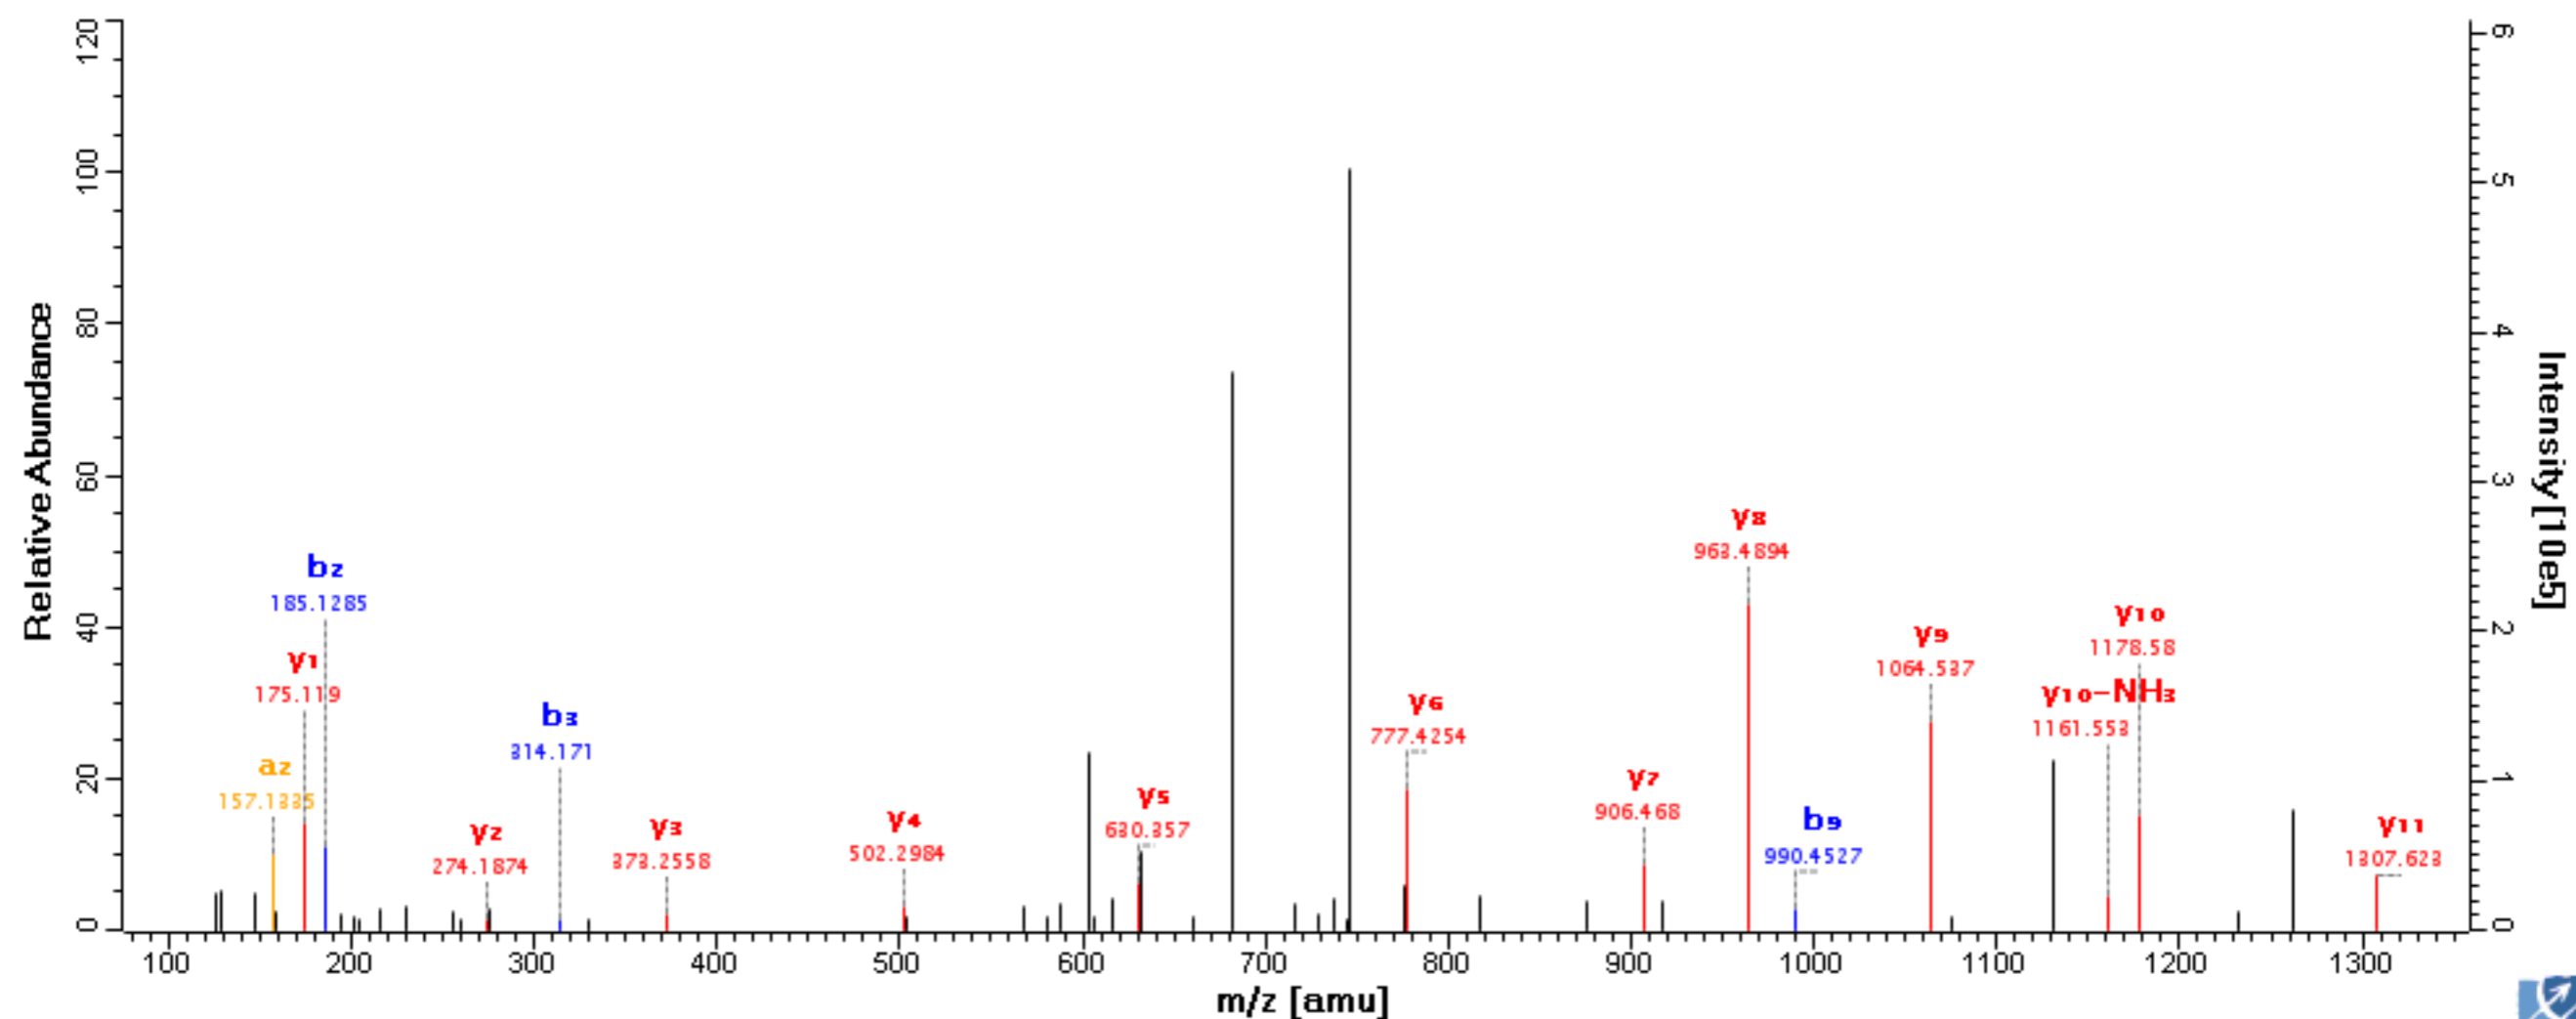

Source: Bibo\_20130531\_RM\_MSC07628\_1\_3  
 Scannumber: 36291  
 Protein: PRSS1; TRP1; TRY1; TRYP1; PRSS3; PRSS2; TRY2; TRYP2; PRSS1; hCG\_1770551; tcag7.1285; TRY8; trypsinogen 8; PRSS1; TRP1; TRY1; TRYP1; T6; TRY6; PRSS1; E7EQ64; Q7Z5F3; P07477;  
 Peptide Score: 79.8  
 Method: FTMS; HCD; 1

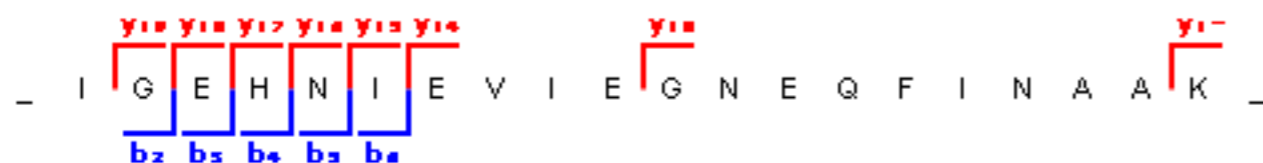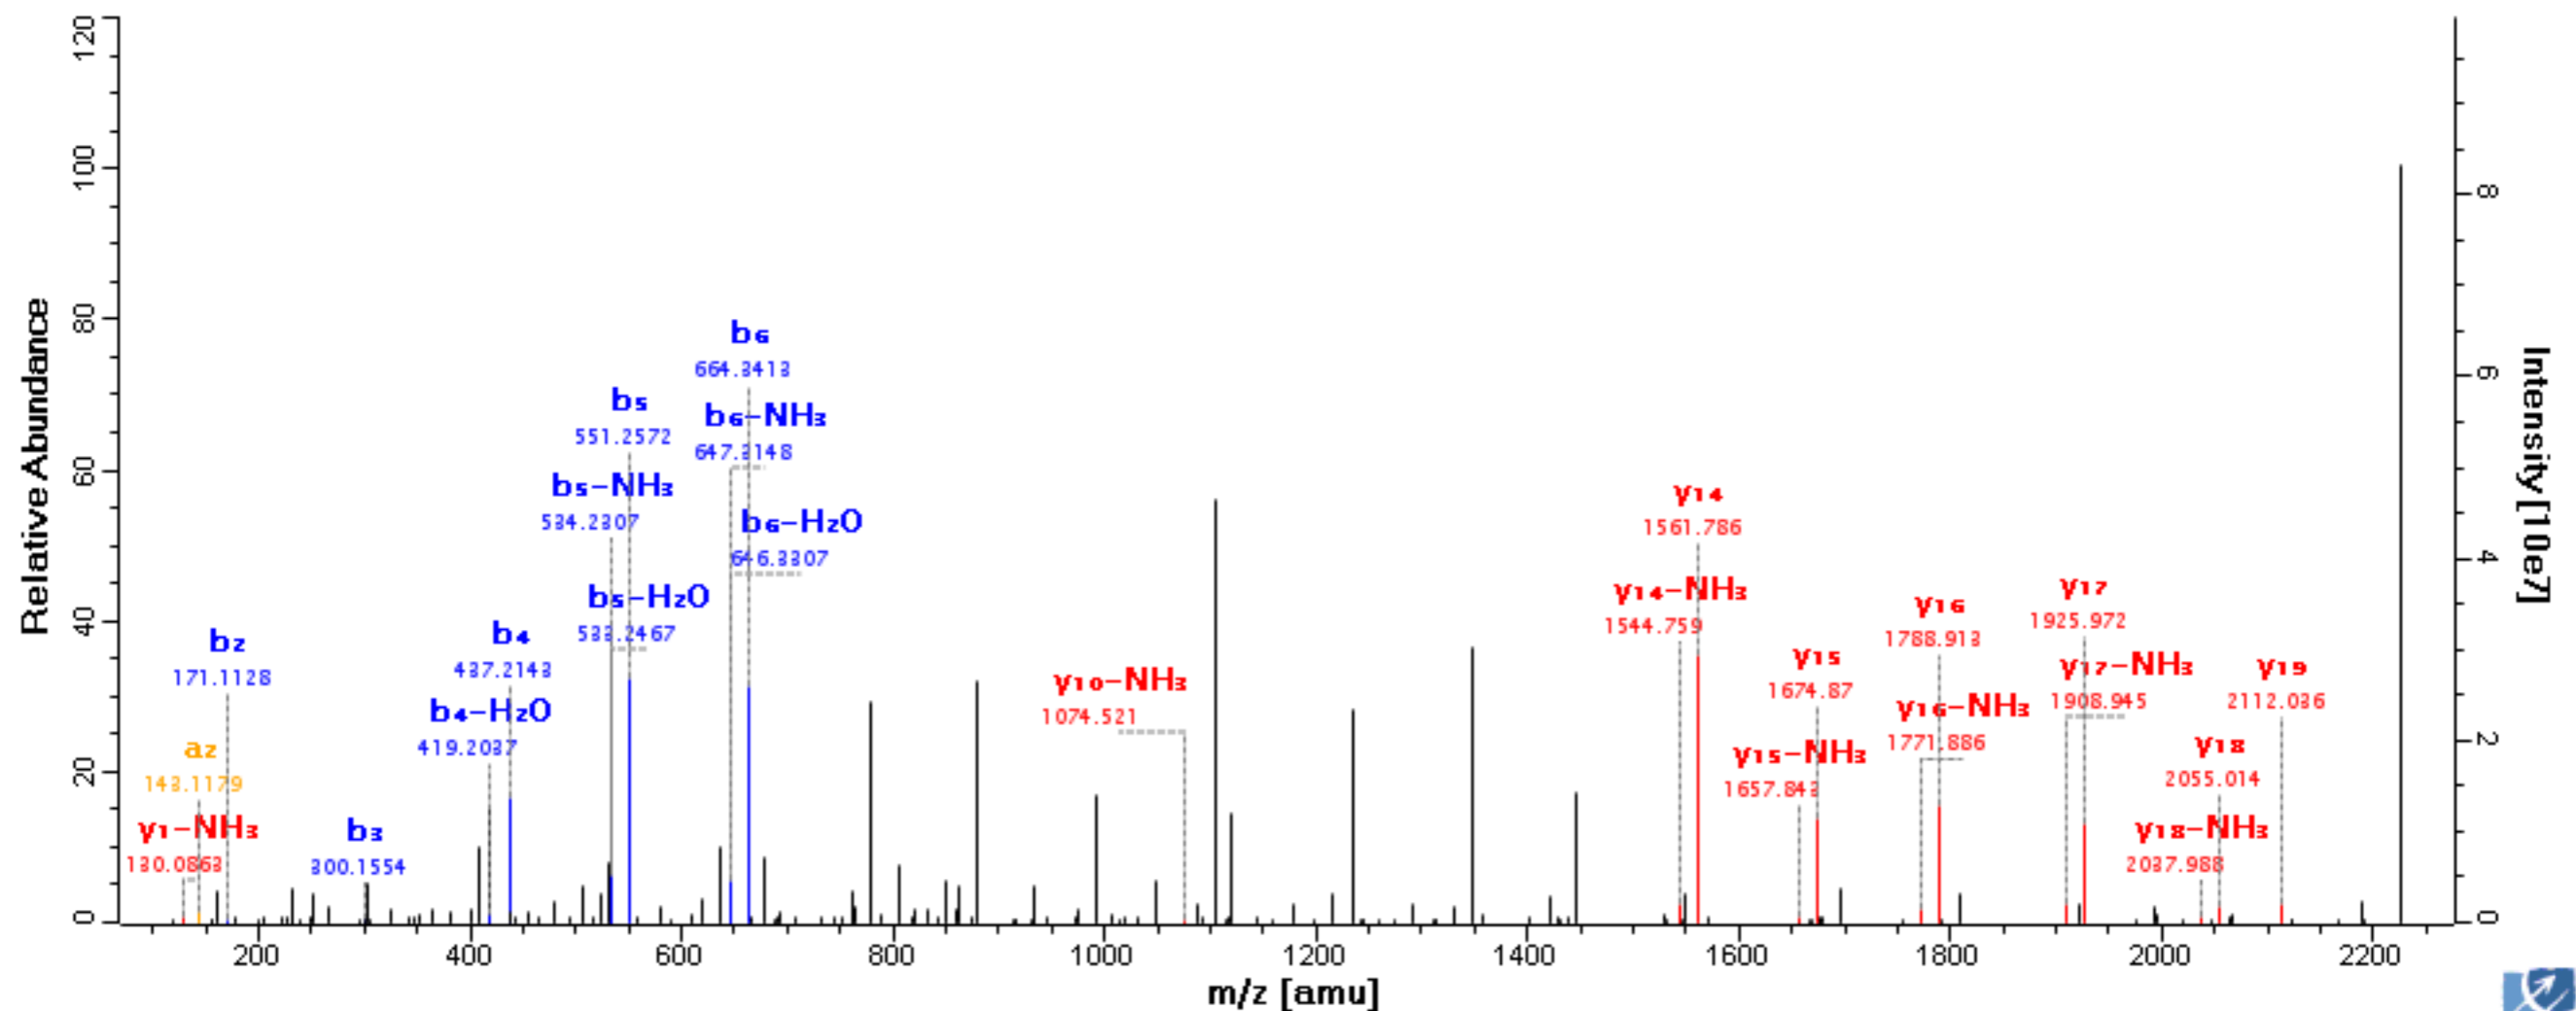

Source: Bibo\_20130531\_RM\_MSC07628\_1\_3

Scannumber: 36316

Protein: C1orf8; HSPC001; TMEM59; UNQ169/PRO195; hCG\_33694; RP4-758J24.2-008; TMEM59; hCG\_33694; RP4-758J24.2-002; TMEM59; RP4-758J24.2-006; TMEM59; Q9BX54; D3DQ48; E9PC

Peptide Score: 74.36

Method: FTMS; HCD; 1

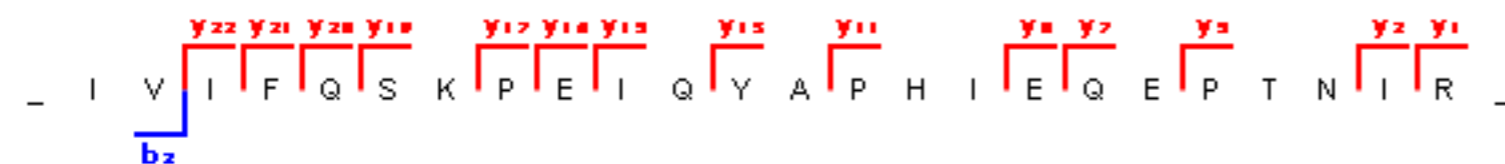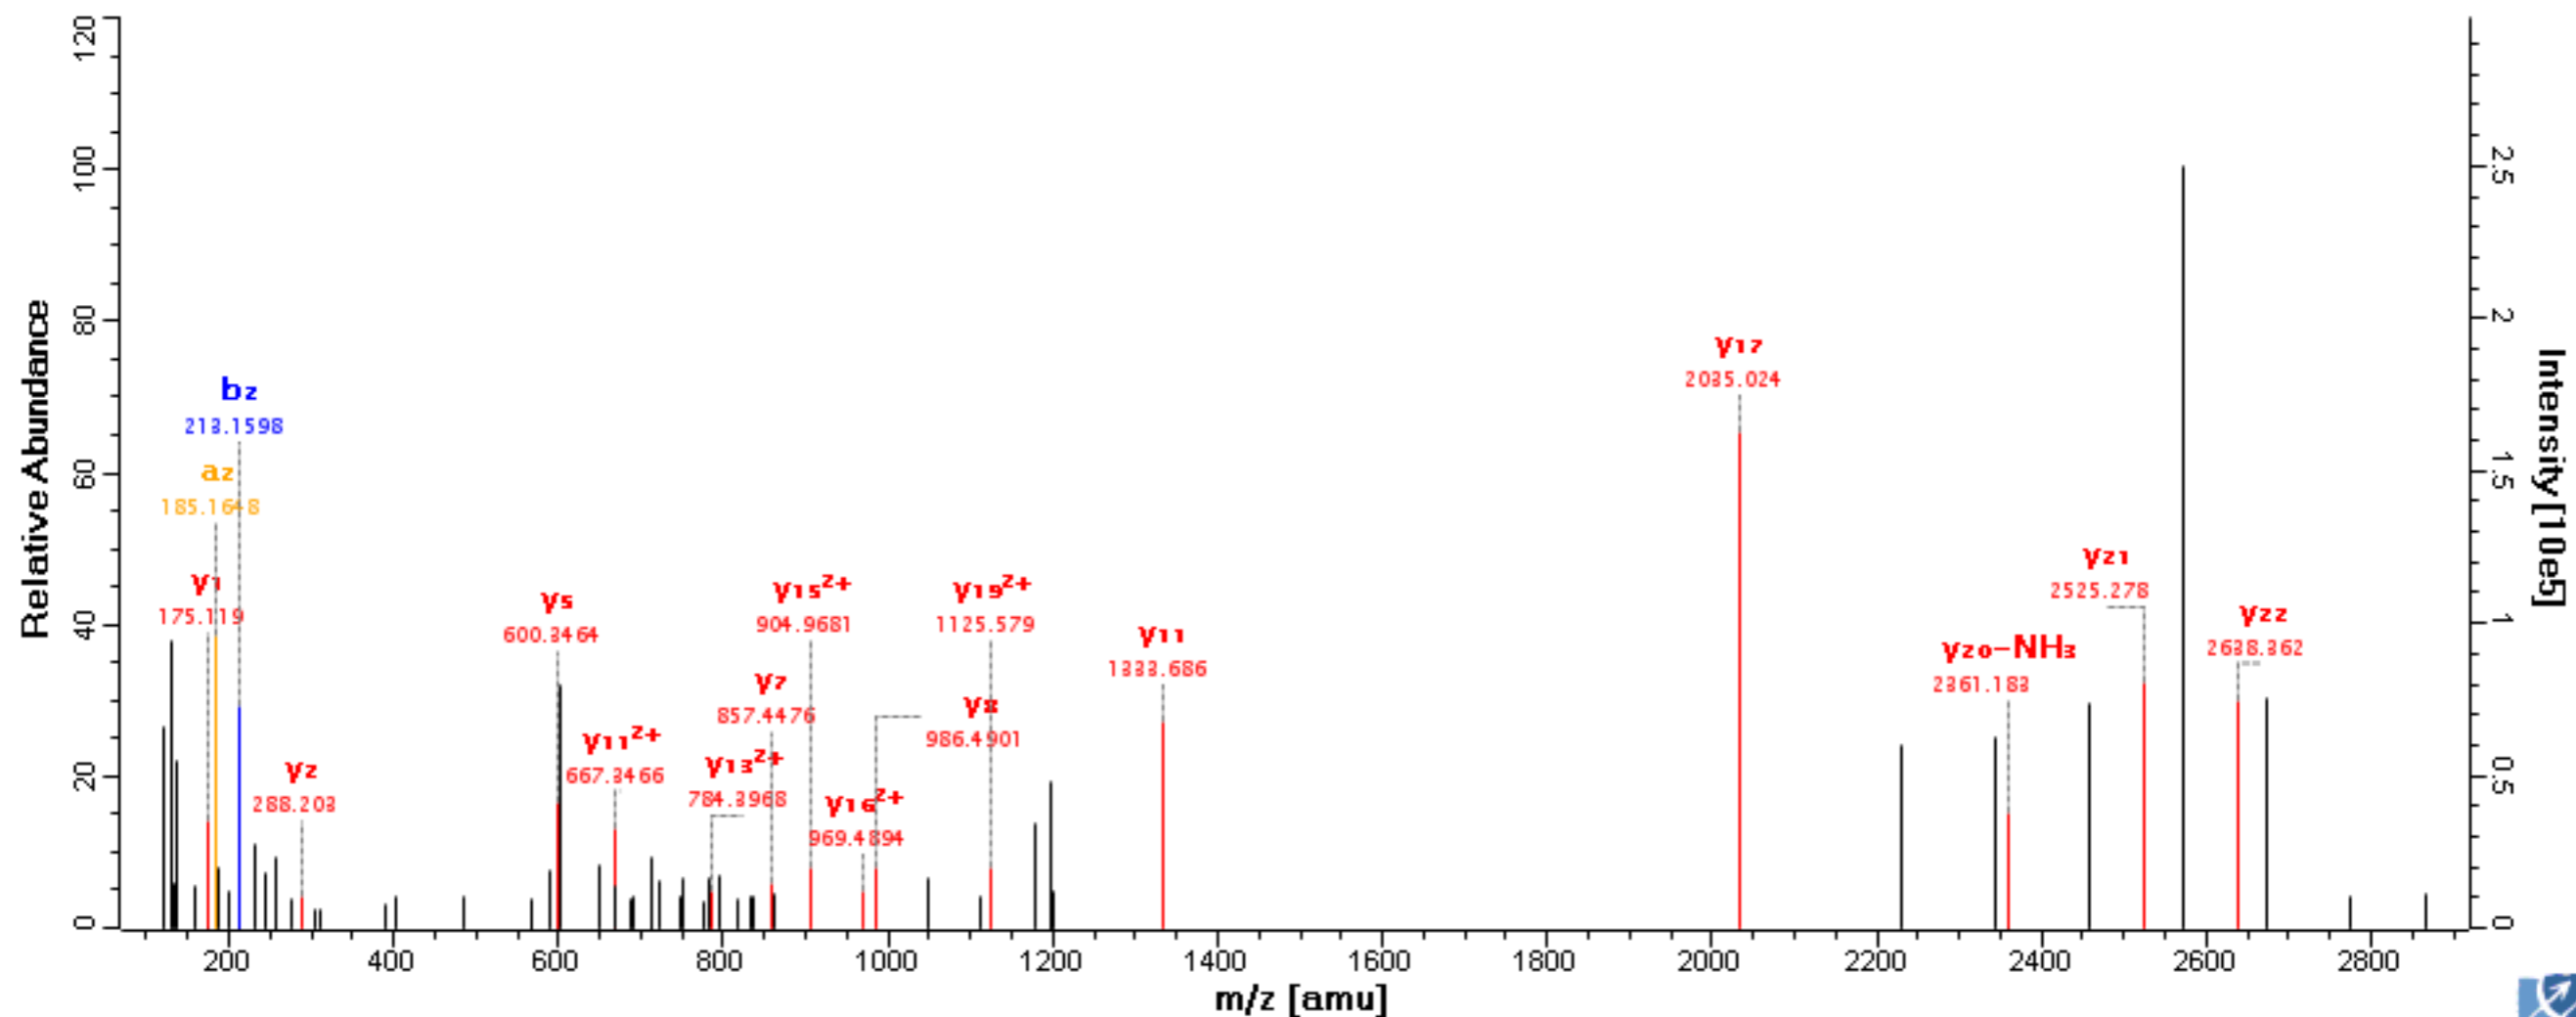

Source: Bibo\_20130531\_RM\_MSC07628\_1\_3  
 Scannumber: 36549  
 Protein: PRSS1; TRP1; TRY1; TRYP1; PRSS3; PRSS2; TRY2; TRYP2; PRSS1; hCG\_1770551; tcag7.1285; TRY8; trypsinogen 8; PRSS1; TRP1; TRY1; TRYP1; T6; TRY6; PRSS1; E7EQ64; Q7Z5F3; P07477;  
 Peptide Score: 62.47  
 Method: FTMS; HCD; 1

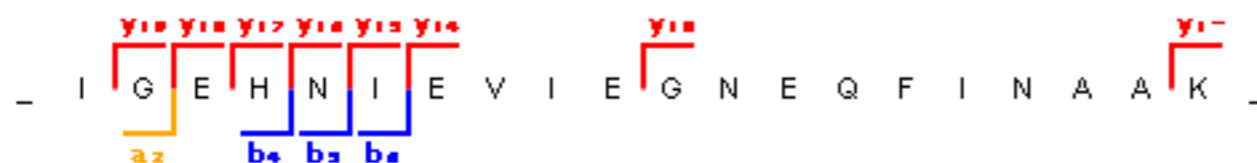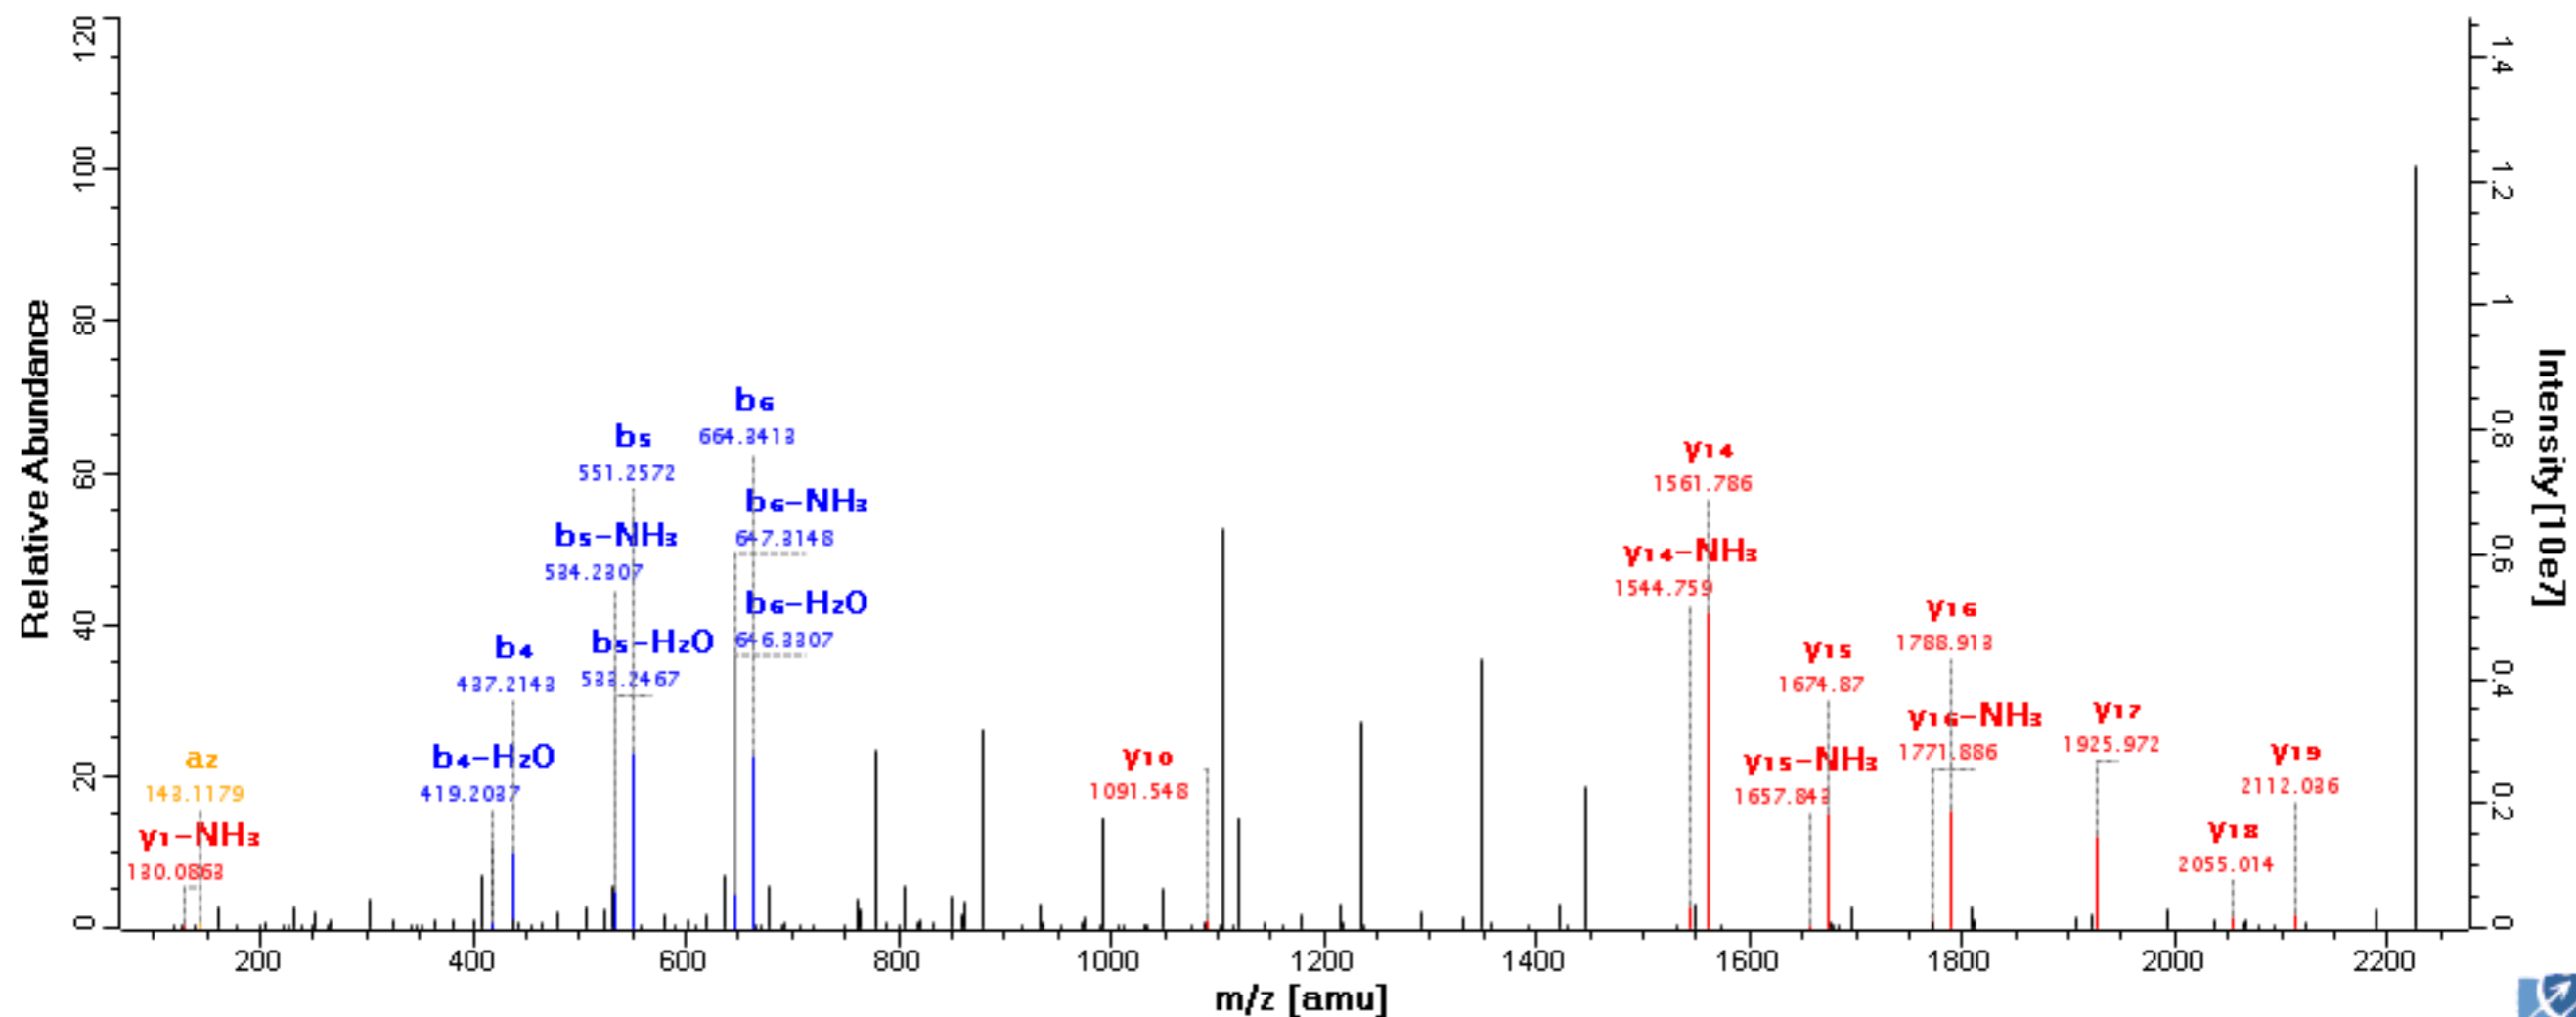

Source: Bibo\_20130531\_RM\_MSC07628\_1\_3  
 Scannumber: 37377  
 Protein: CBX; CBX1; hCG\_2000655; CBX3; CCDC32; hCG\_1745364; hCG\_1999239; tcag7.173; CBX1; P83916; E9PCS5; Q6IBN6; Q13185; A4D177; B5MD17  
 Peptide Score: 106.13  
 Method: FTMS; HCD; 1

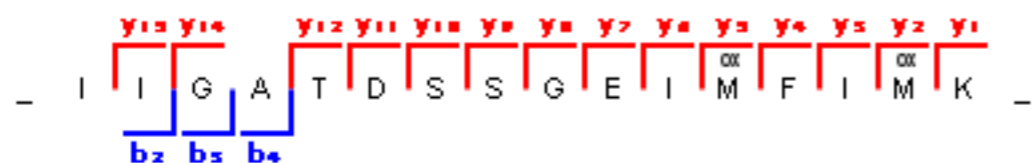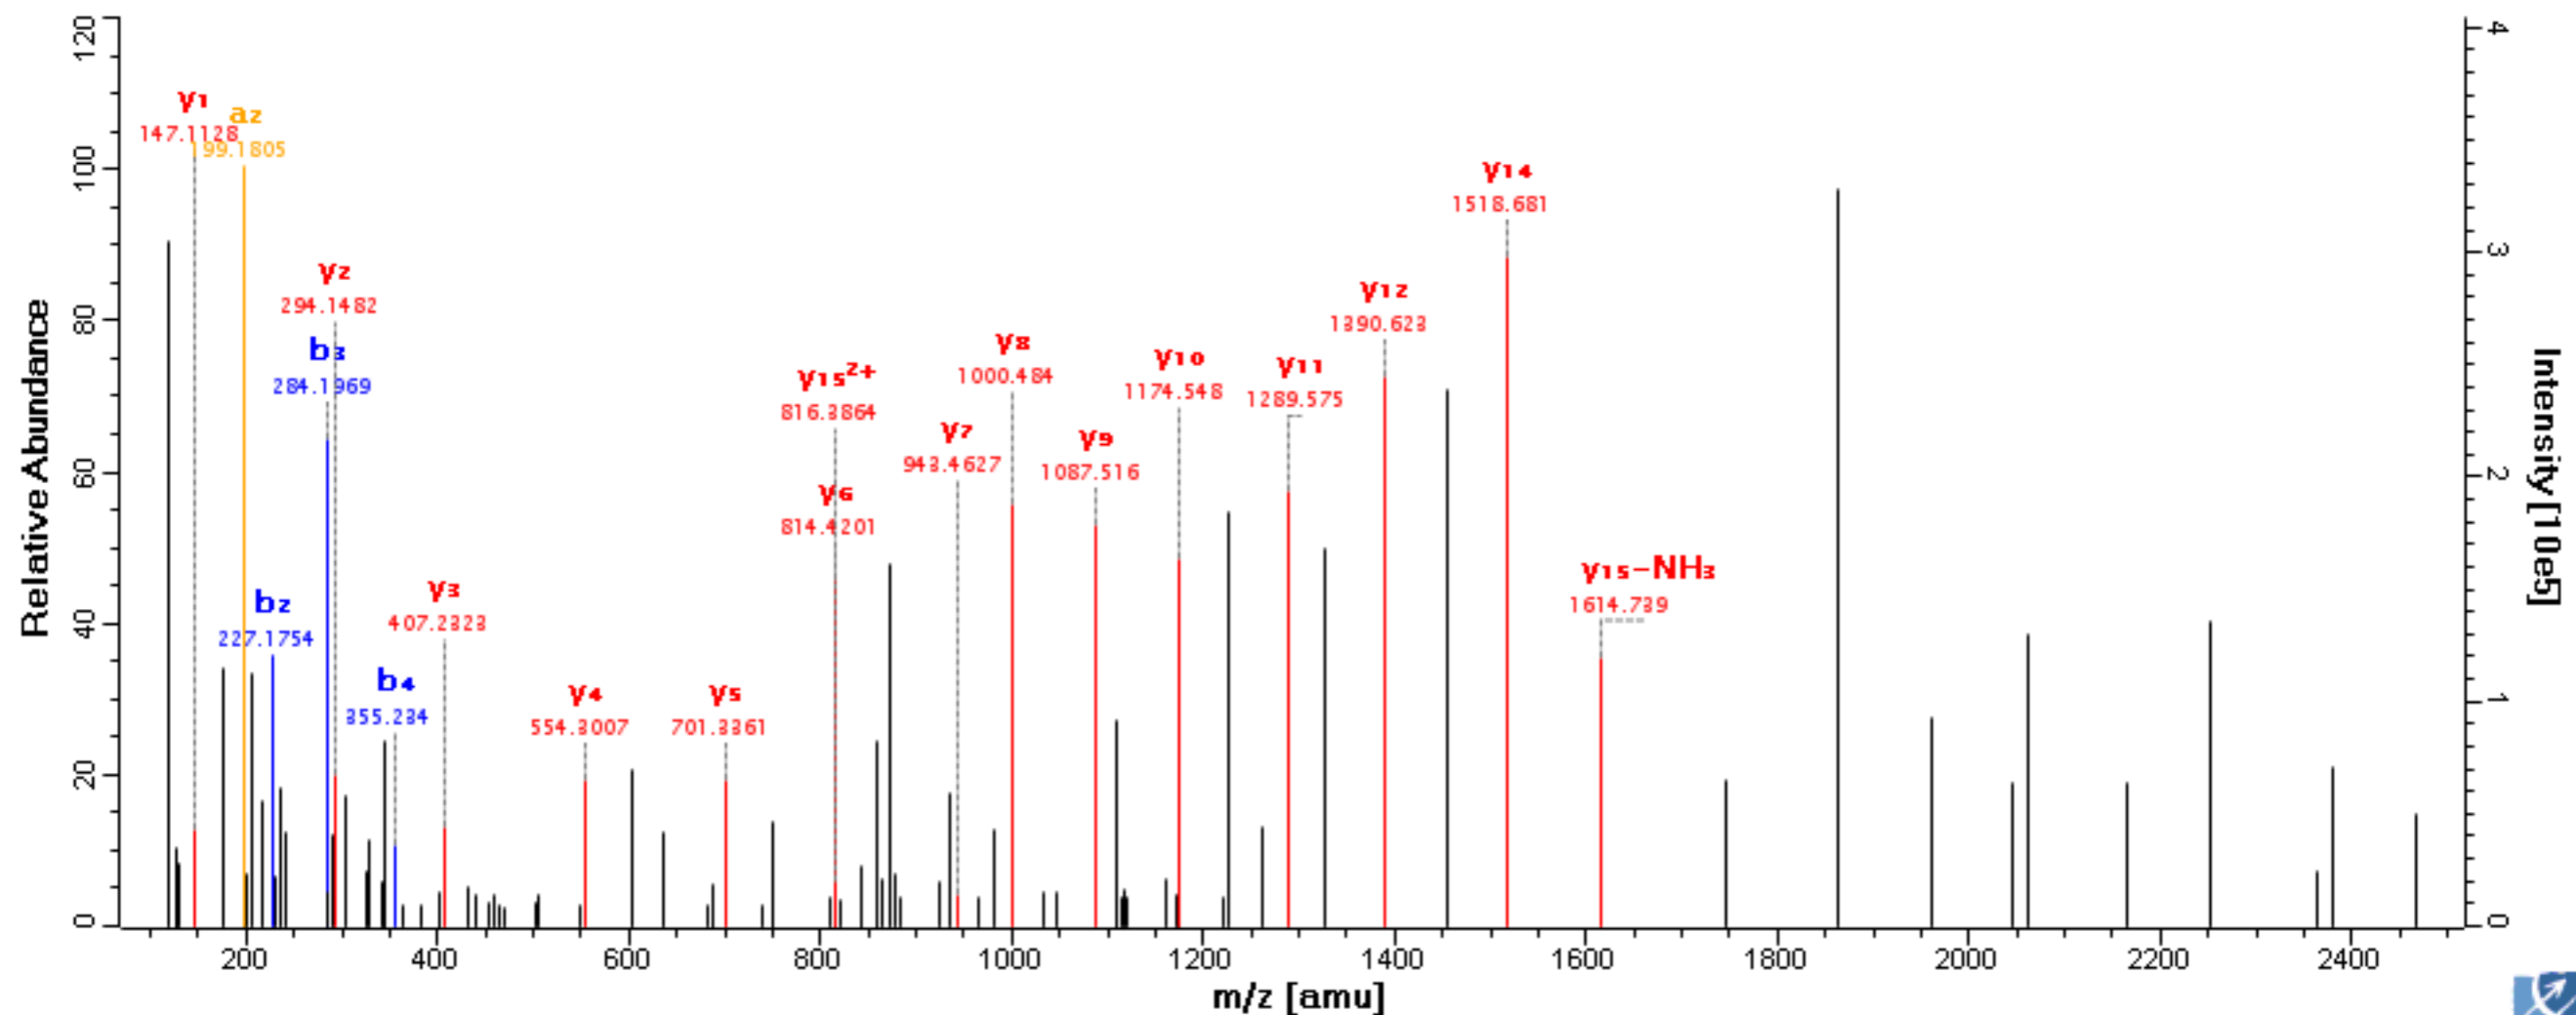

Source: Bibo\_20130531\_RM\_MSC07628\_1\_3  
 Scannumber: 40228  
 Protein: CANX; B4DGP8; P27824; Q16094; D6RDP7; D6RB85; D6RAU8; D6RAQ8; D6RD16; D6RHJ3  
 Peptide Score: 76.26  
 Method: FTMS; HCD; 1

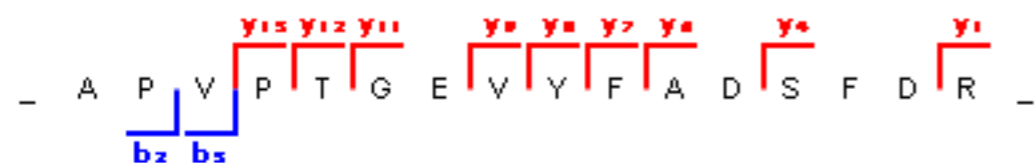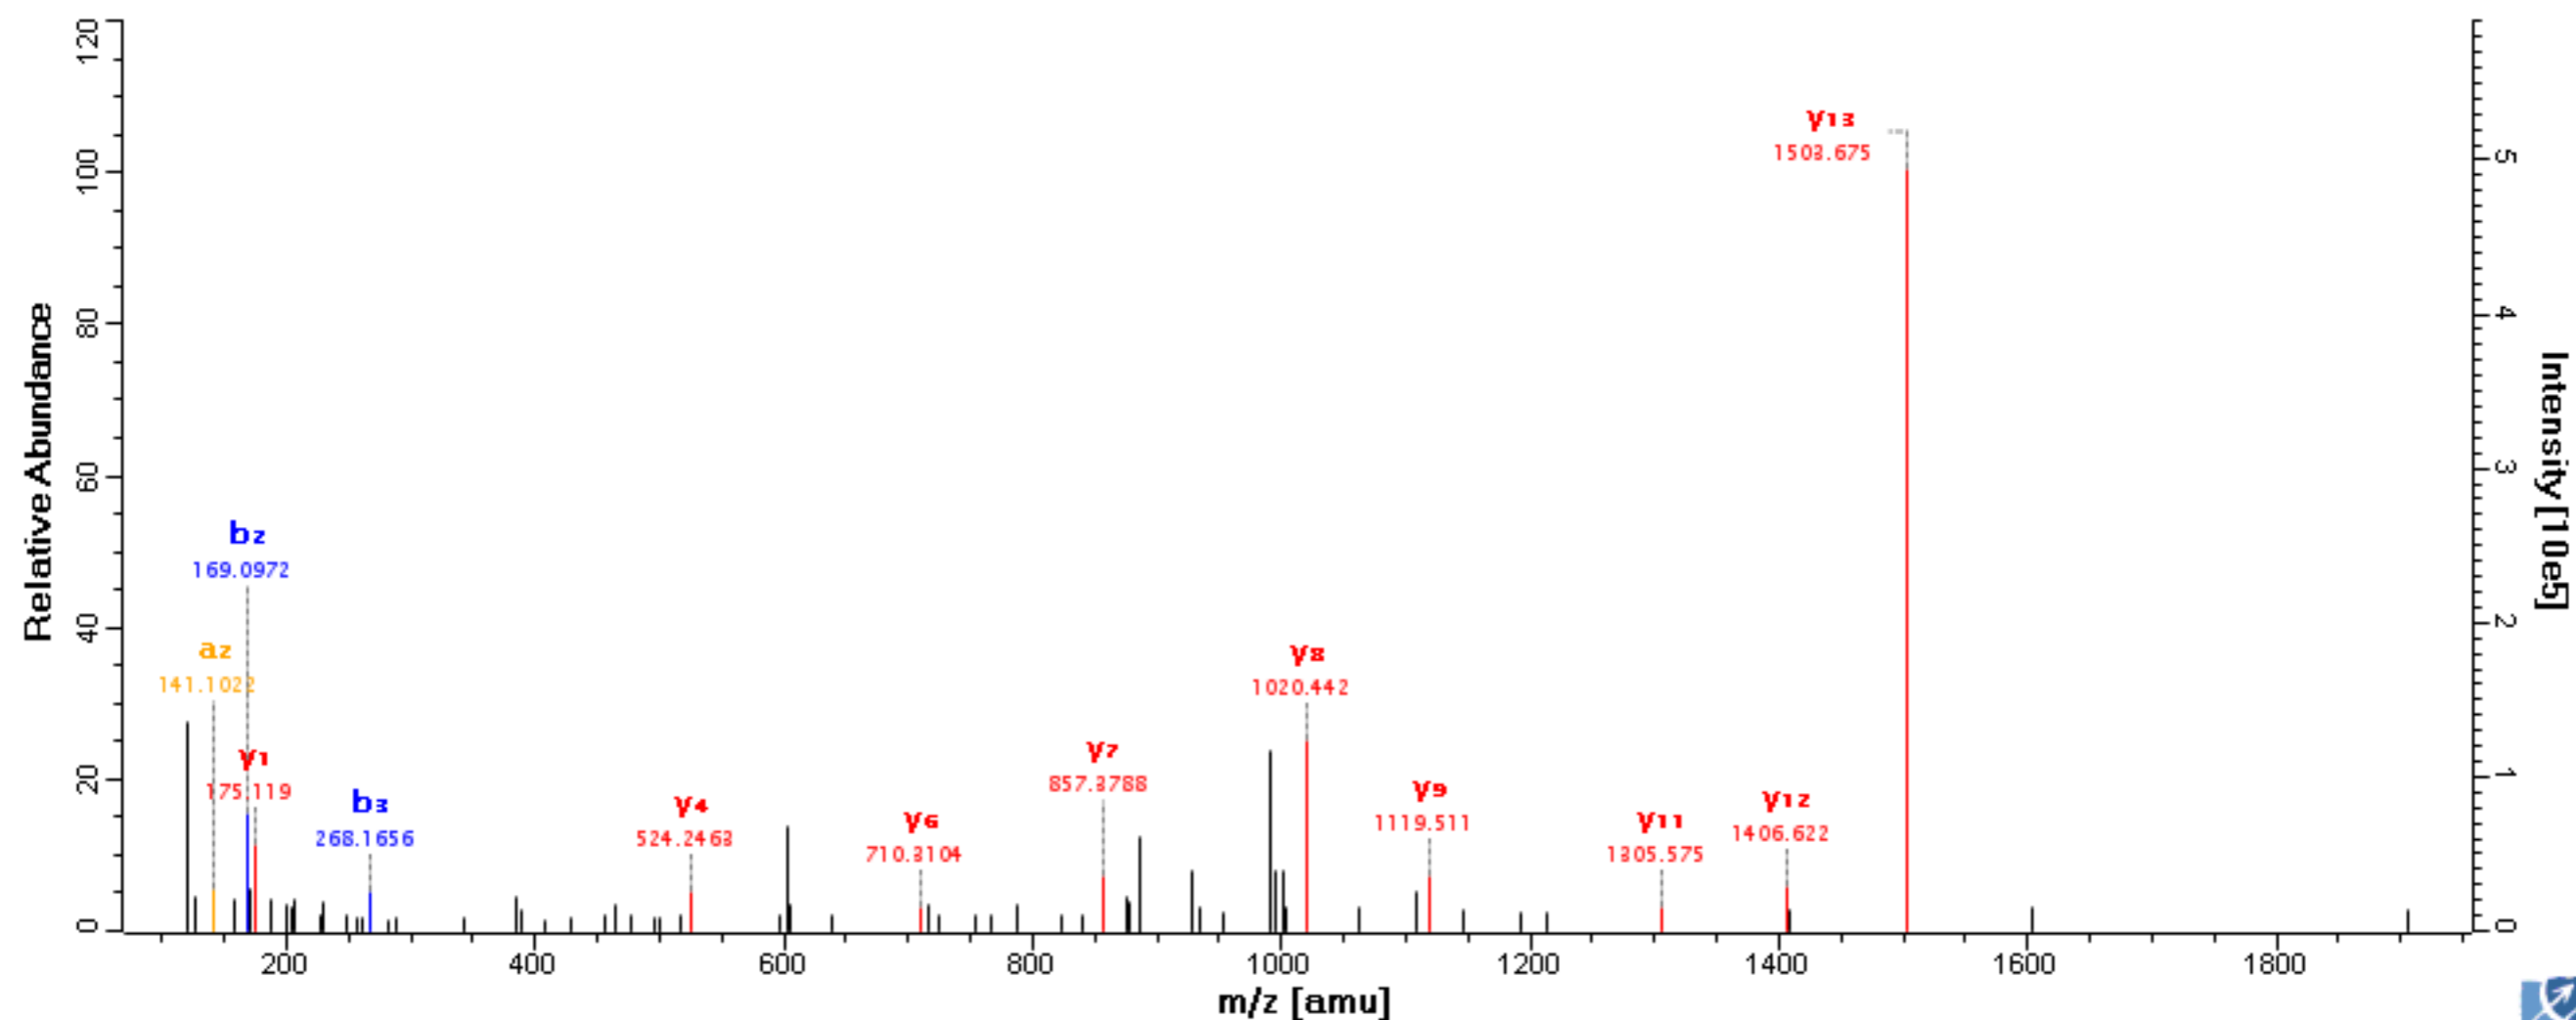

Source: Bibo\_20130531\_RM\_MSC07628\_1\_3  
Scannumber: 42755  
Protein: meis1; B7Z4 T5; E9PDC4; Q9HCQ4  
Peptide Score: 0.92  
Method: FTMS; HCD; 1

ac ox  
- M Q P V H H I N H G P P I H S H Q Y P H T A H T N A M A P S M G S S V N D A I K R -  
b<sub>19</sub> y<sub>1</sub> y<sub>1</sub>

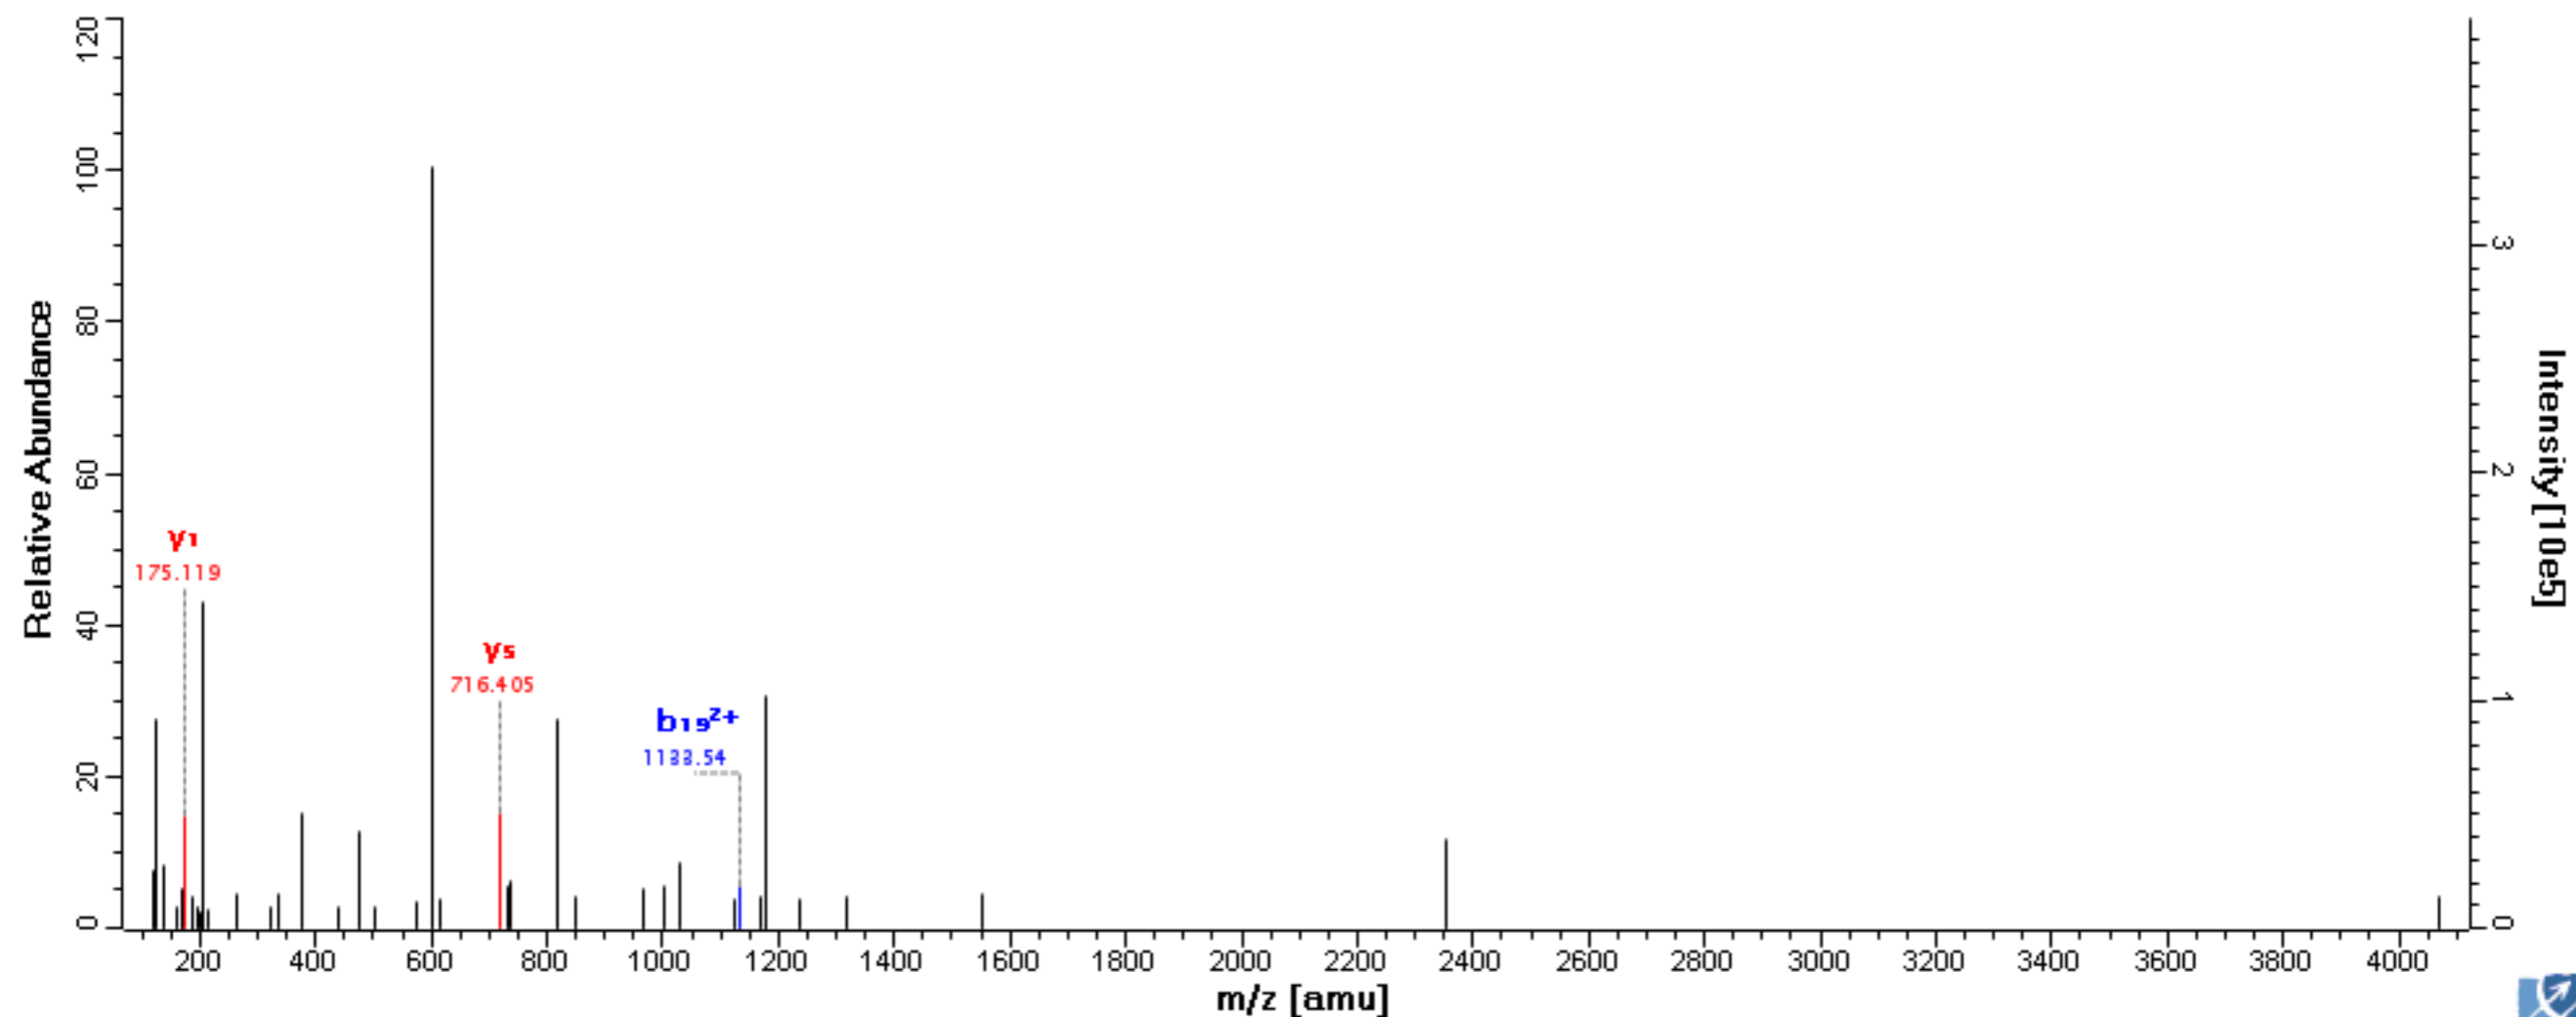

Source: Bibo\_20130531\_RM\_MSC07628\_1\_3  
Scannumber: 43215  
Protein: IPI00984483  
Peptide Score: 0.19  
Method: FTMS; HCD; 1

<sup>ac</sup> \_ E W N G <sup>ox</sup> M E W N G <sup>ox</sup> M E W N A <sup>ox</sup> M E W N A <sup>ox</sup> M E W N A M E W <sup>gl</sup> K <sup>y1</sup> R \_

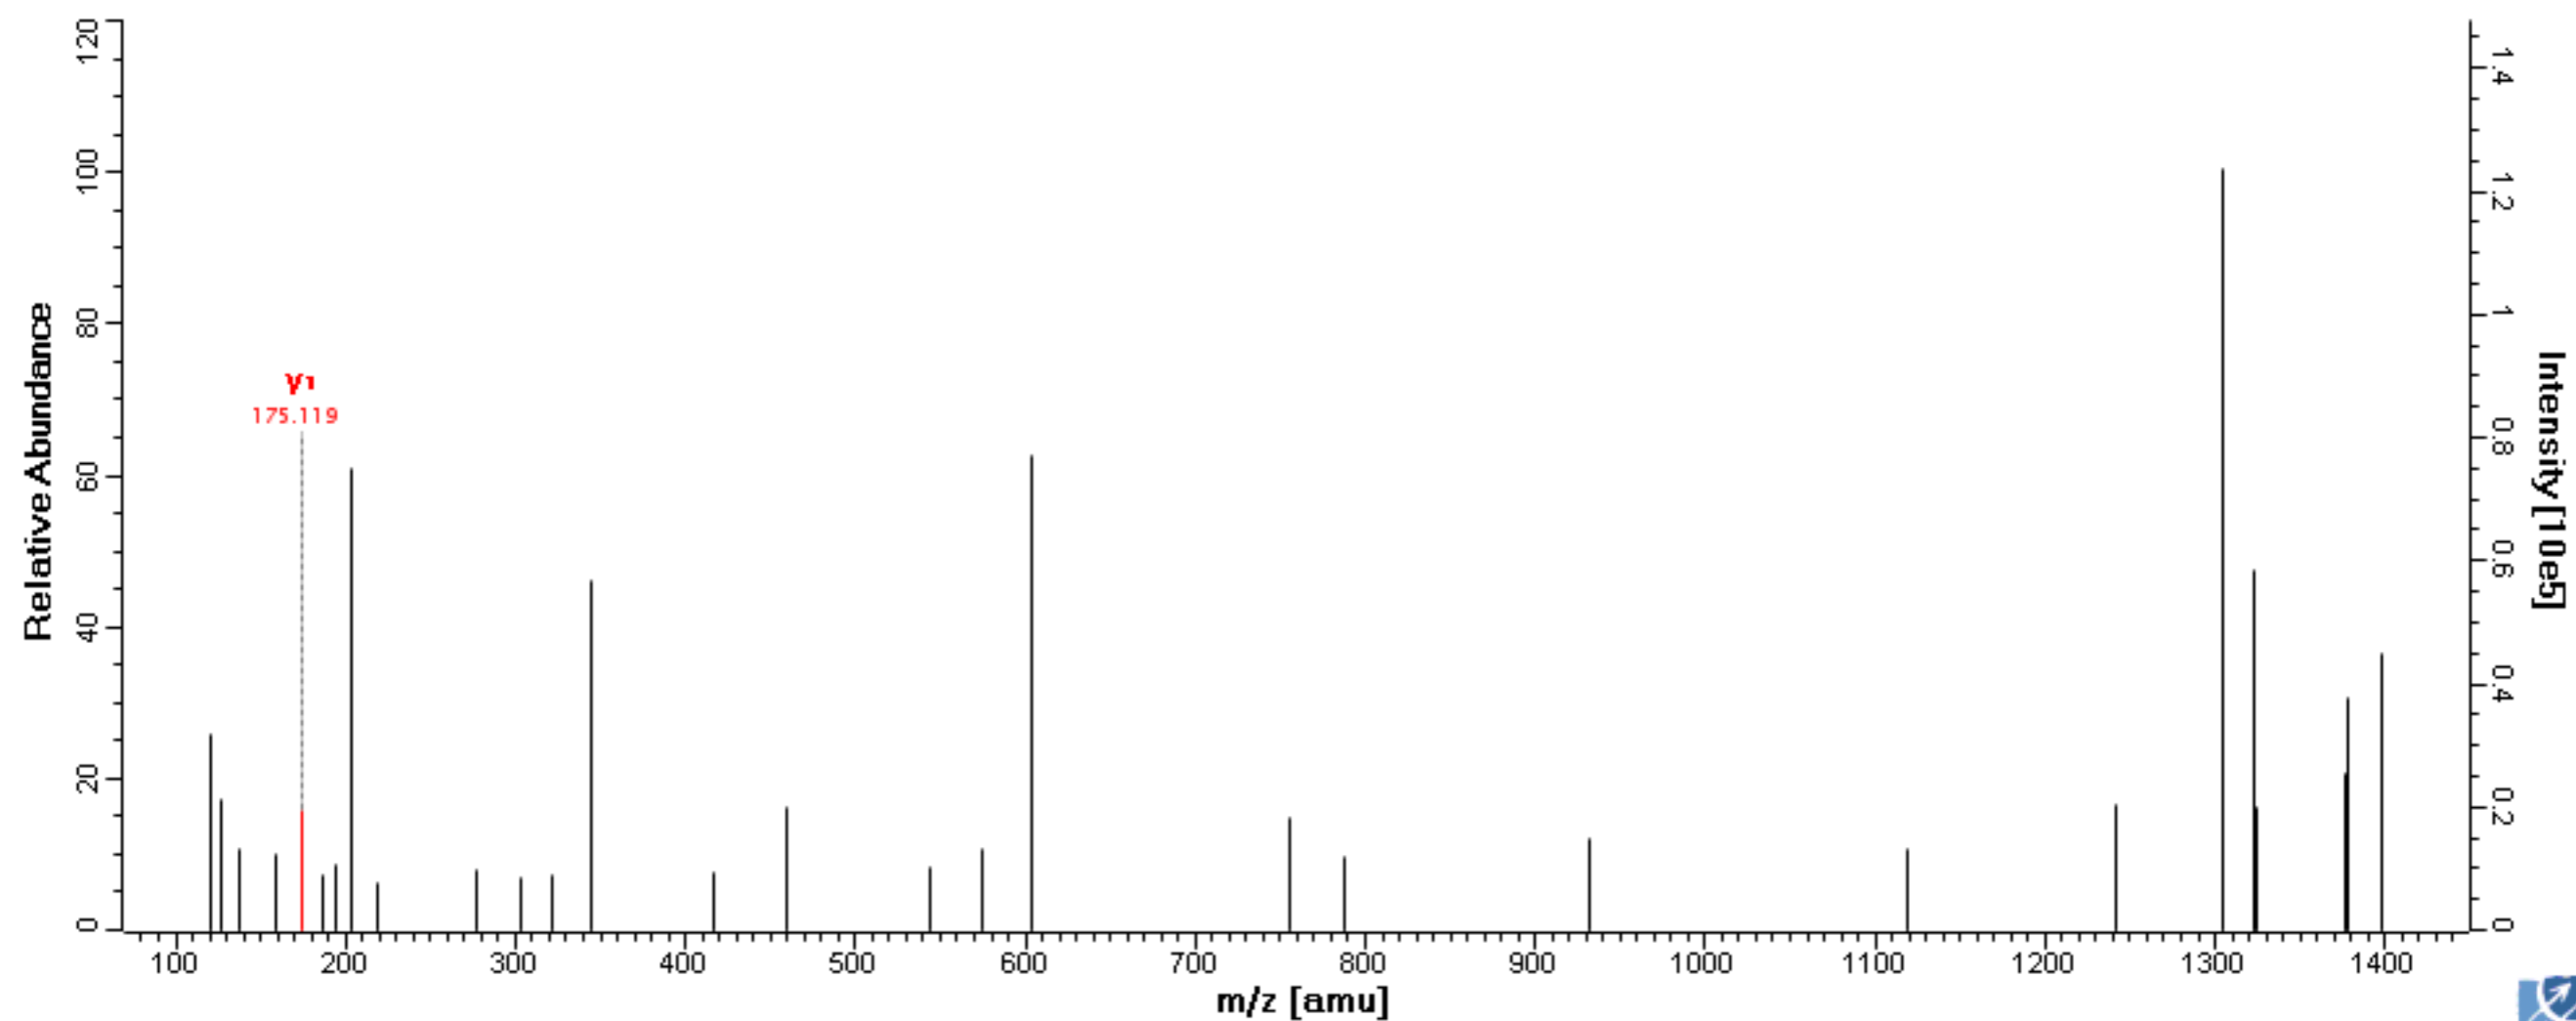

Source: Bibo\_20130531\_RM\_MSC07628\_1\_3  
Scannumber: 44627  
Protein: IPI00984483  
Peptide Score: 0.58  
Method: FTMS; HCD; 1

<sup>ac</sup> \_ E W N G <sup>ox</sup> M E W N G <sup>ox</sup> M E W N A <sup>ox</sup> M E W N A <sup>ox</sup> M E W N A M E W <sup>gl</sup> K <sup>y1</sup> R \_

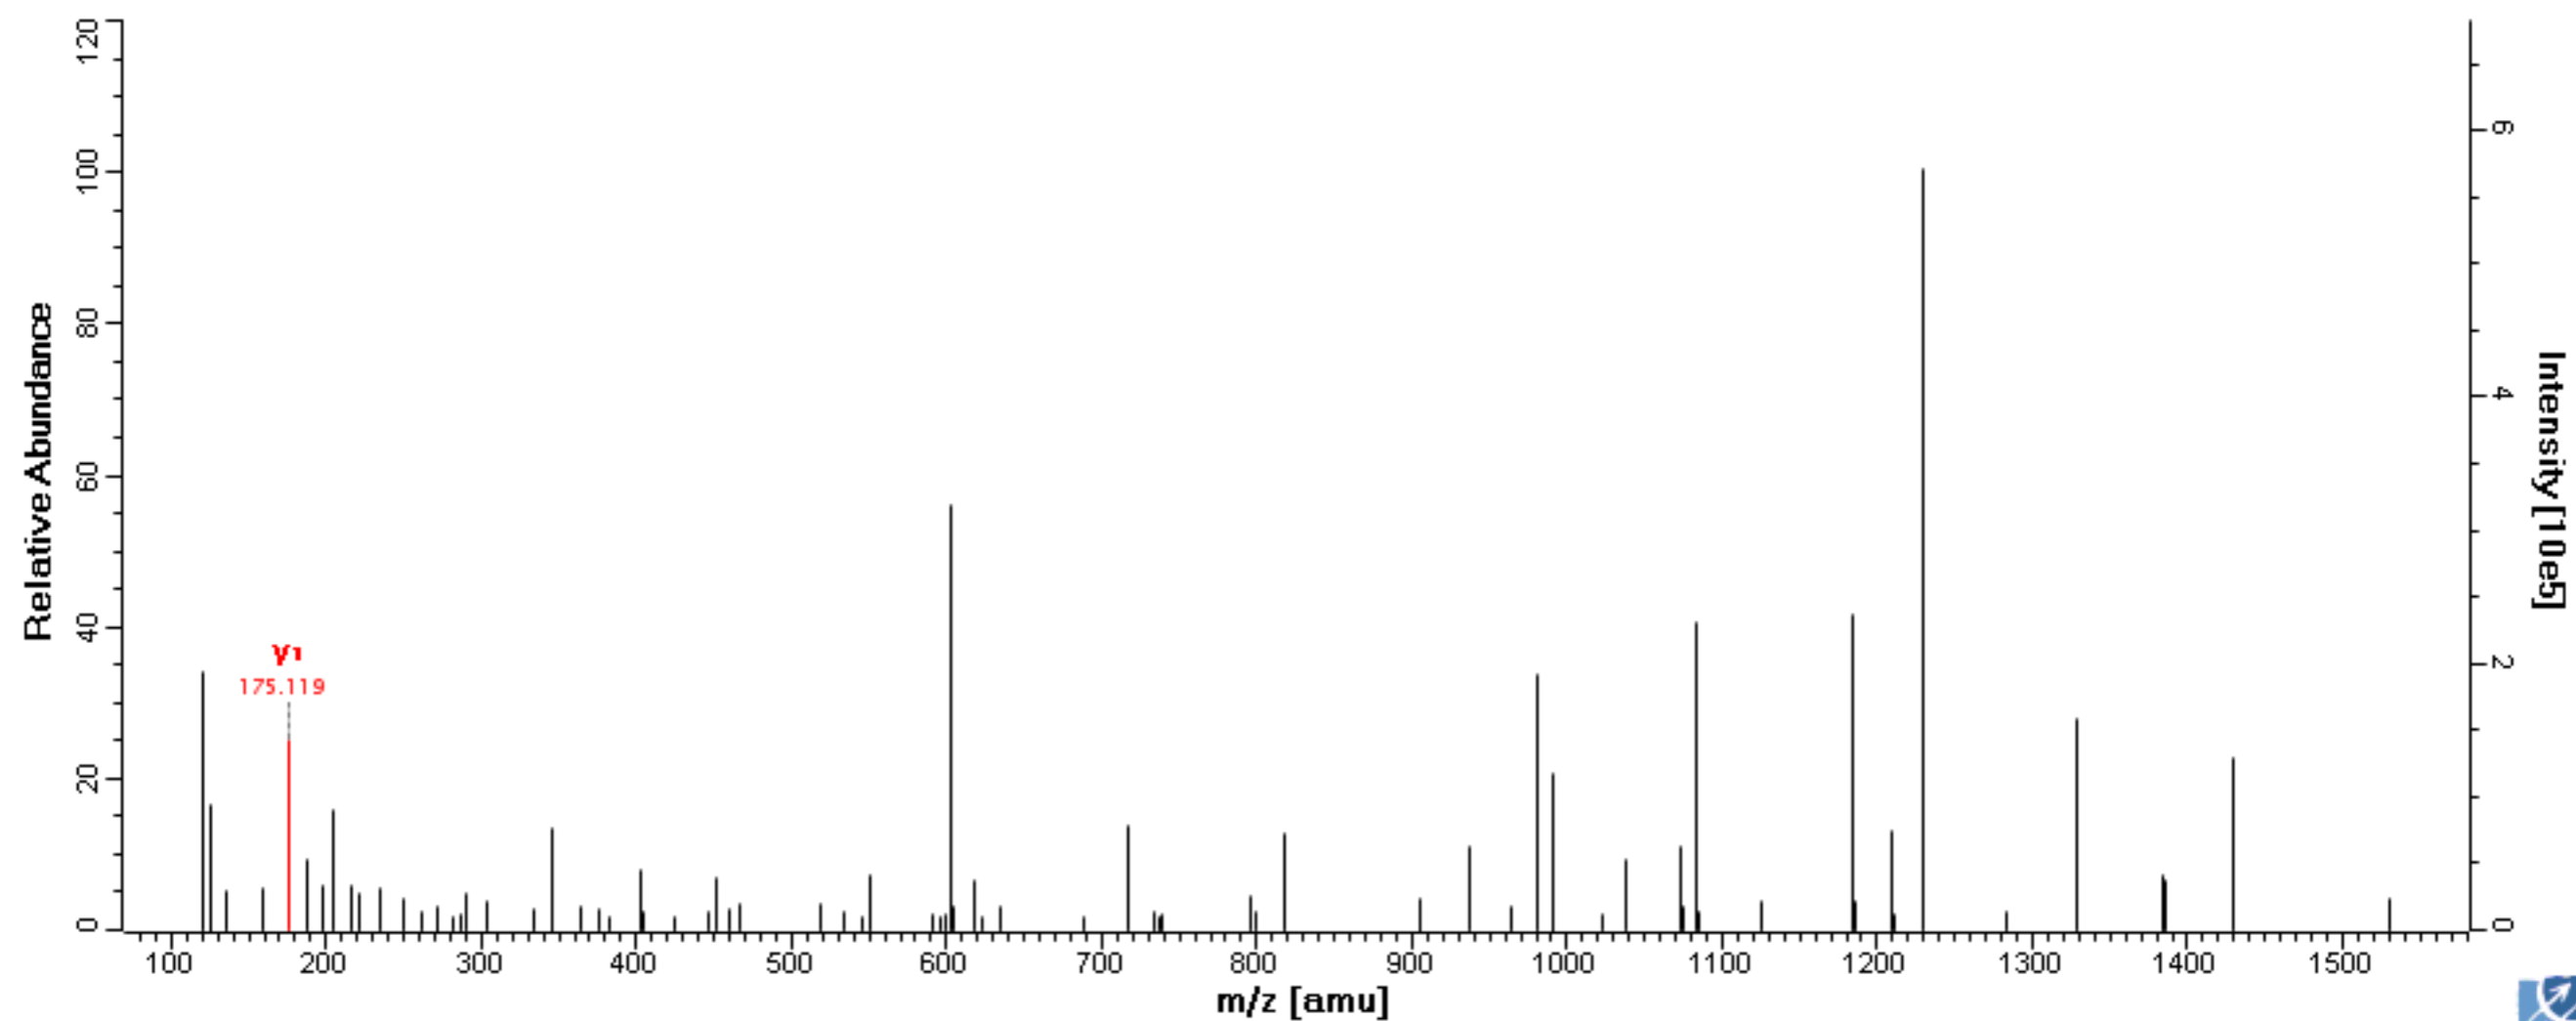

Source: Bibo\_20130531\_RM\_MSC07628\_1\_3  
 Scannumber: 45441  
 Protein: EEF1B; EEF1B2; EF1B; hCG\_19809; LOC392793; tcag7.1190; EEF1B2; P24534; A4D1M6; C9JZW3; F2Z2G2  
 Peptide Score: 82.91  
 Method: FTMS; HCD; 1

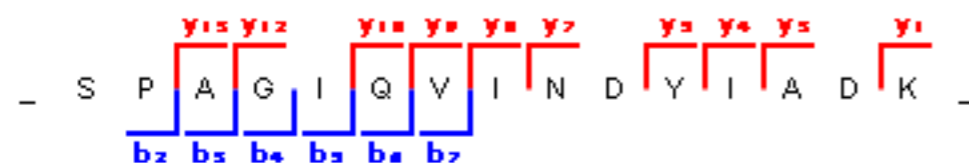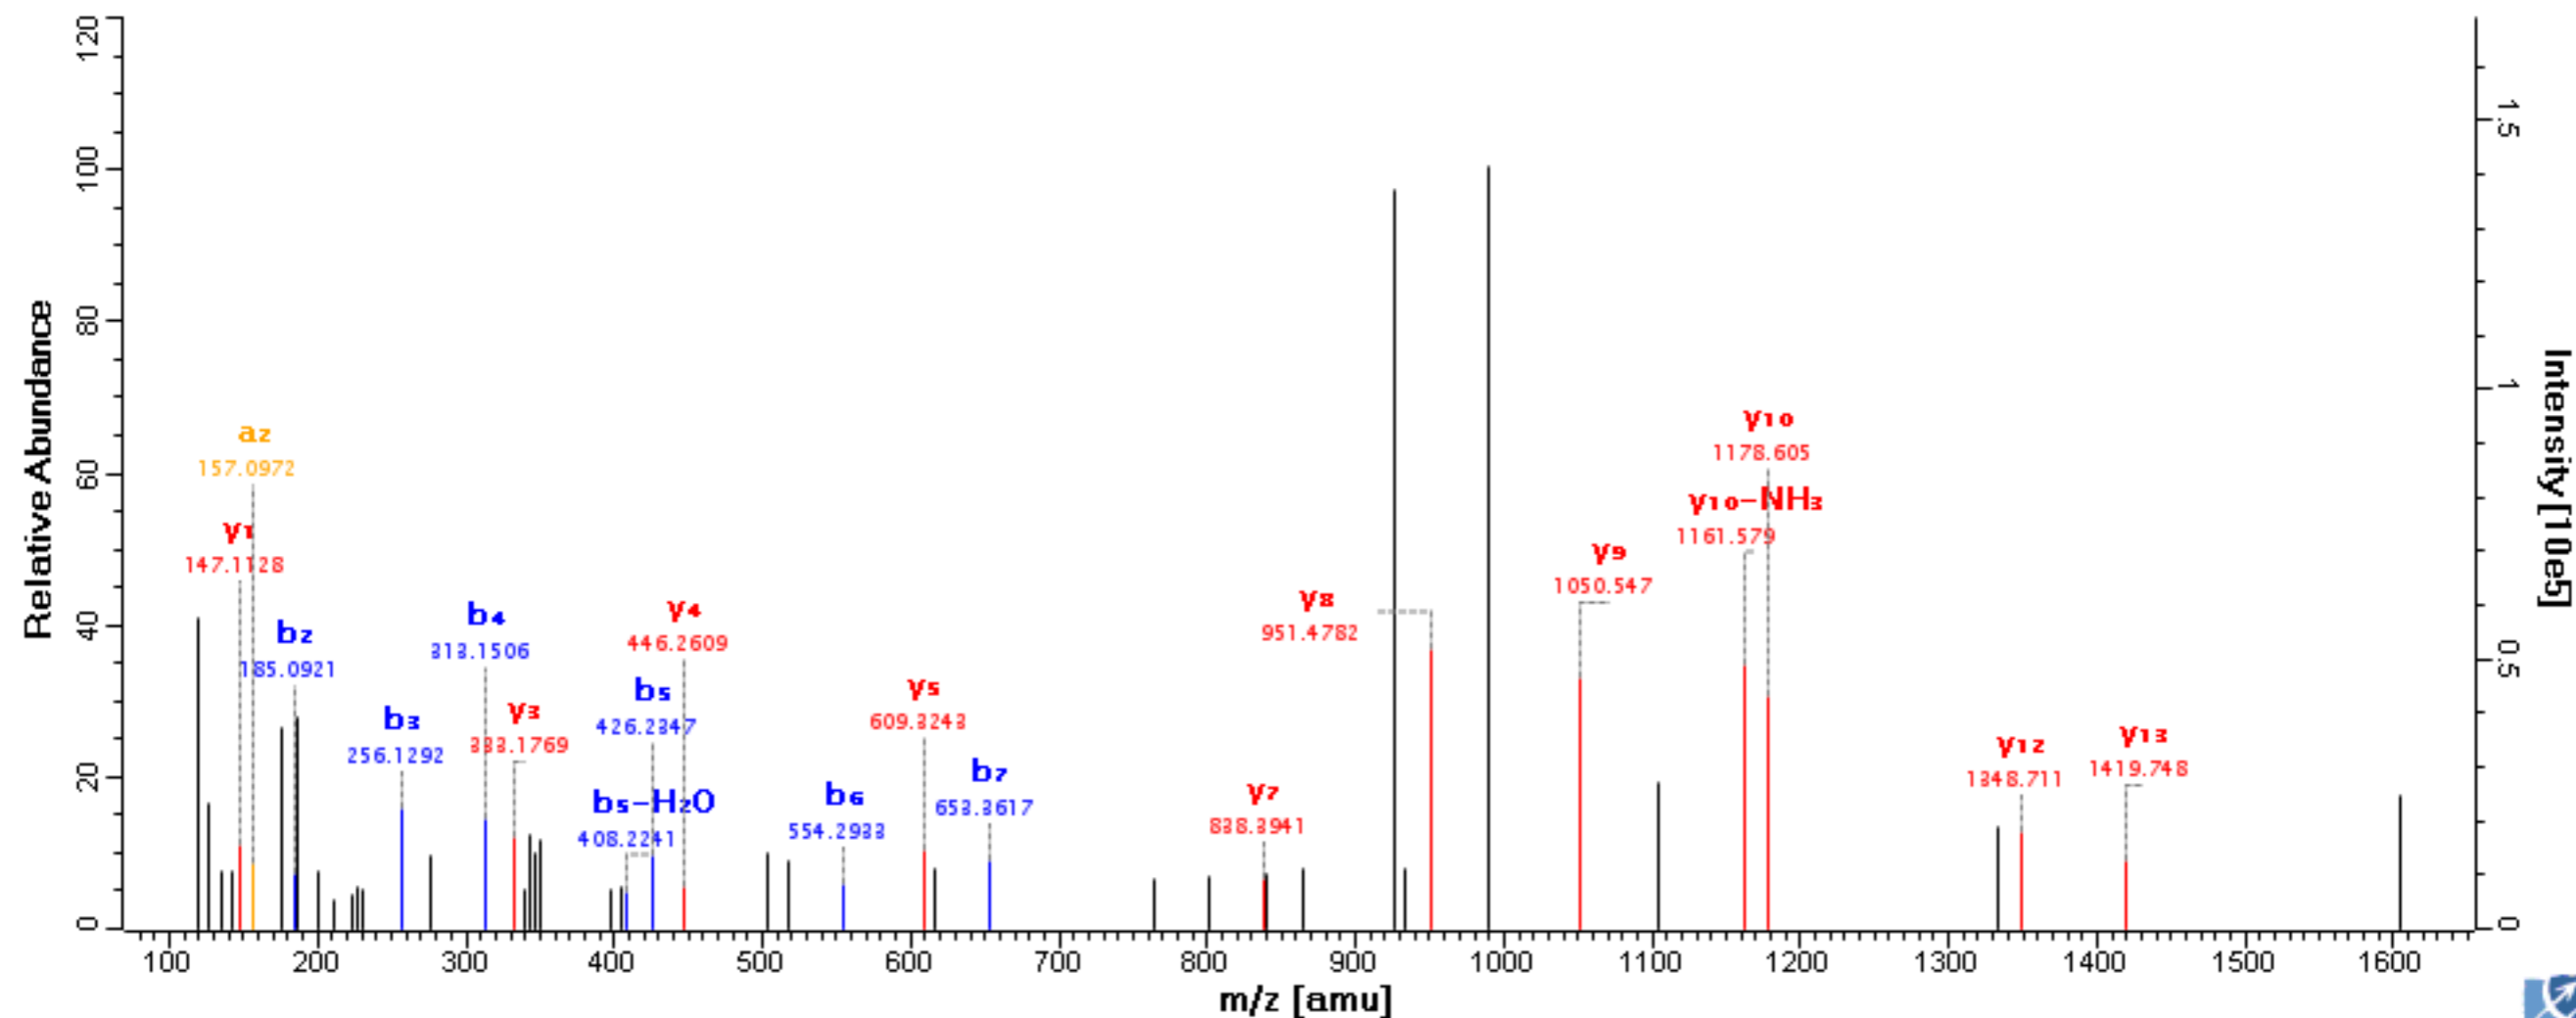

Source: Bibo\_20130531\_RM\_MSC07628\_1\_3  
 Scannumber: 45733  
 Protein: CAGB; CFAG; MRP14; S100A9; P06702; B2R4M6  
 Peptide Score: 95.65  
 Method: FTMS; HCD; 1

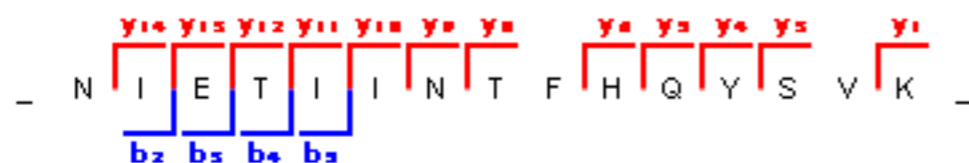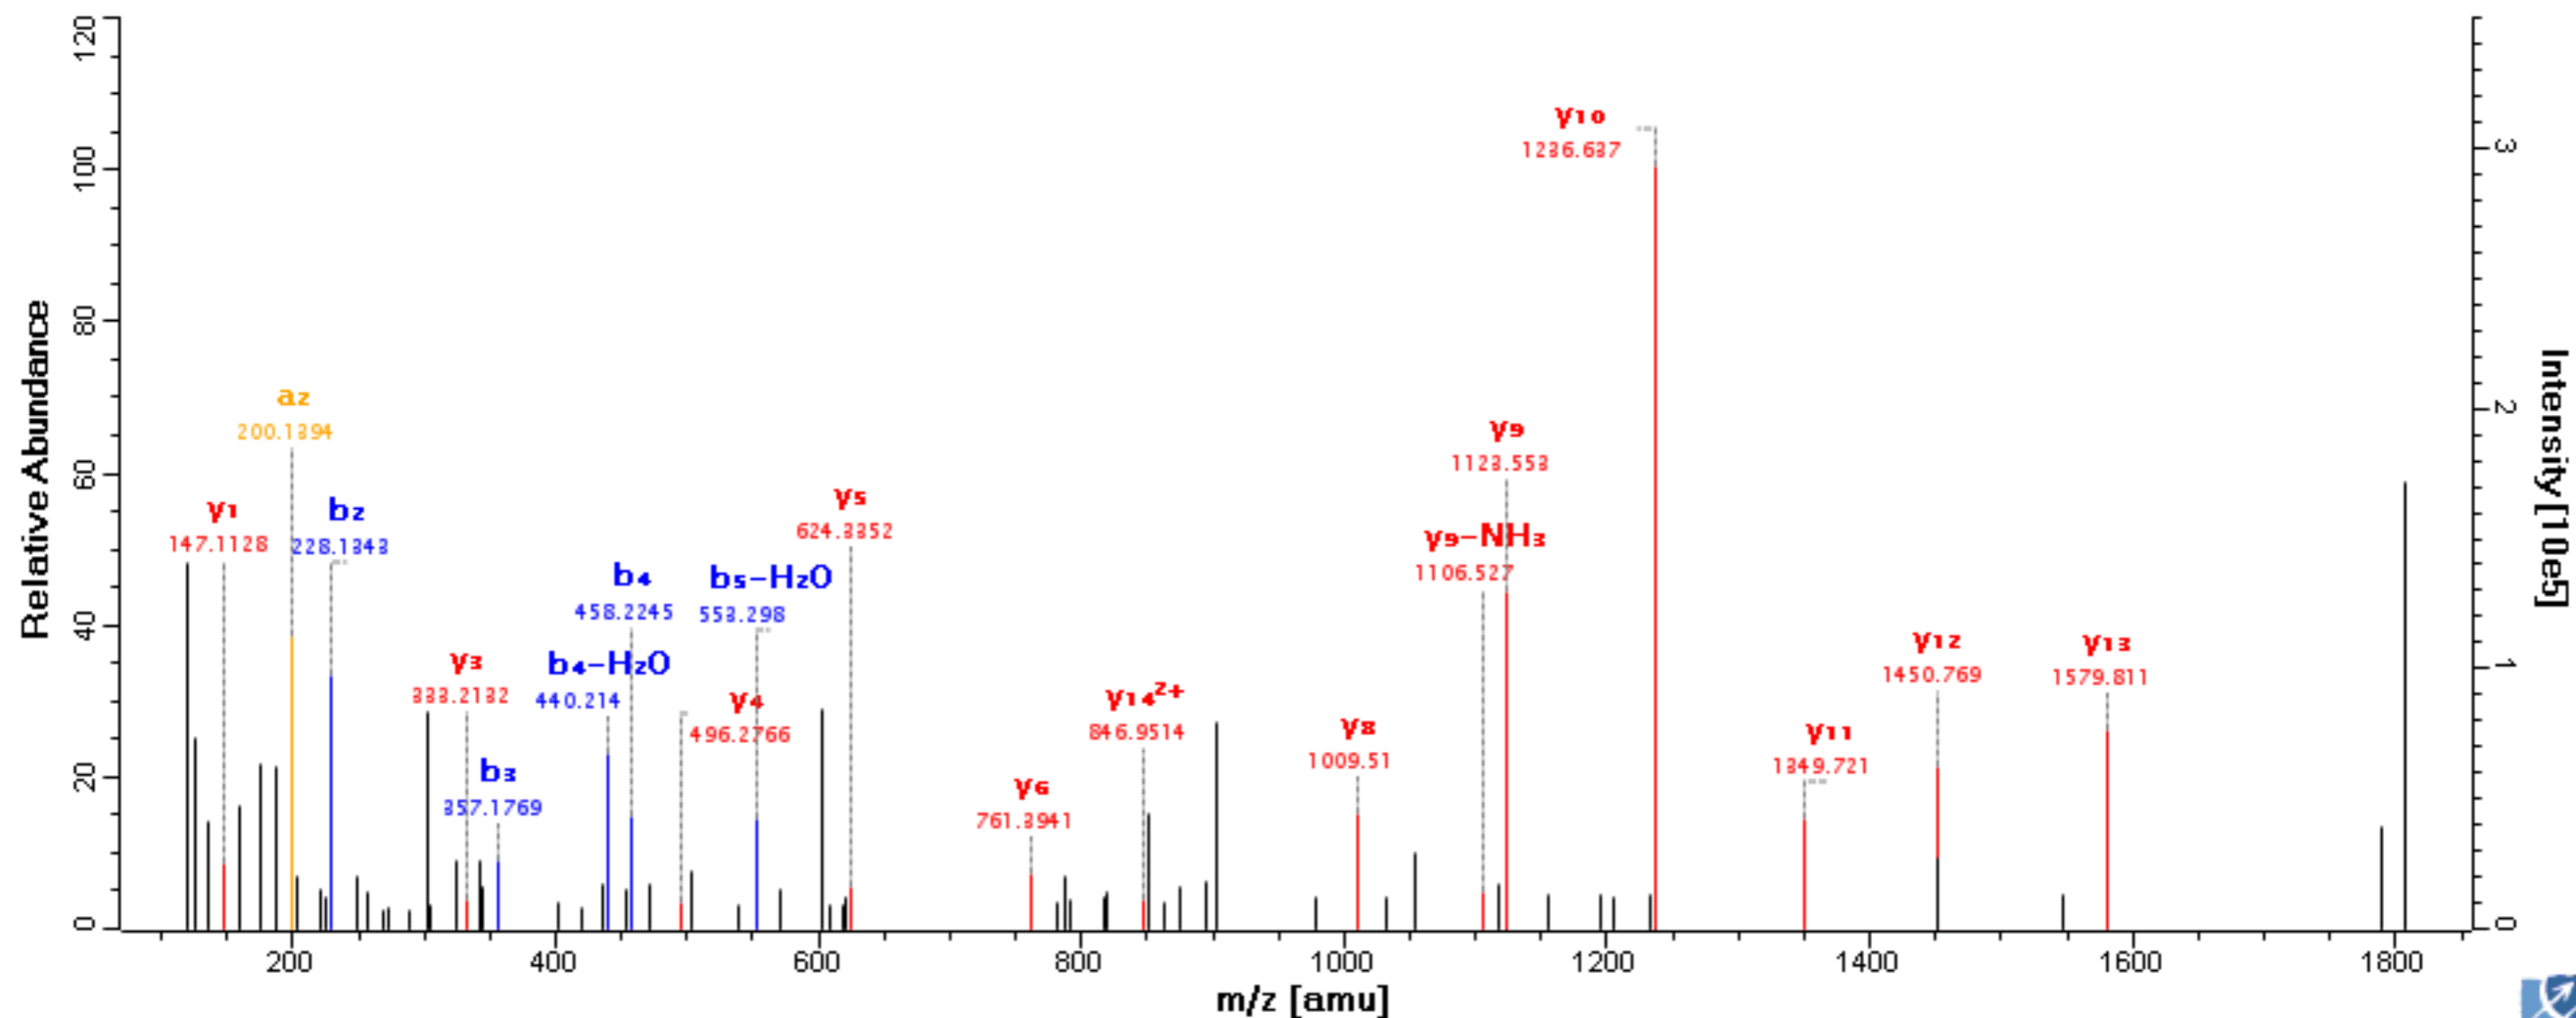

Source: Bibo\_20130531\_RM\_MSC07628\_1\_3  
 Scannumber: 48573  
 Protein: SAKS1; UBXN1; SAKS1; UBXN1; hCG\_1818009; LOC51035; UBXN1; Q04323-2; Q04323; Q04323-1; Q04323; E9PRQ7; B4DNC6; E9PJ81; Q05BV2; B4EOP8  
 Peptide Score: 72.45  
 Method: FTMS; HCD; 1

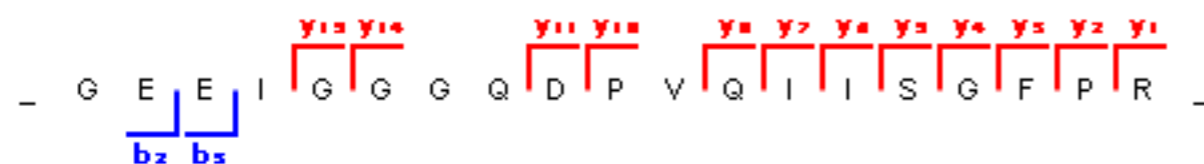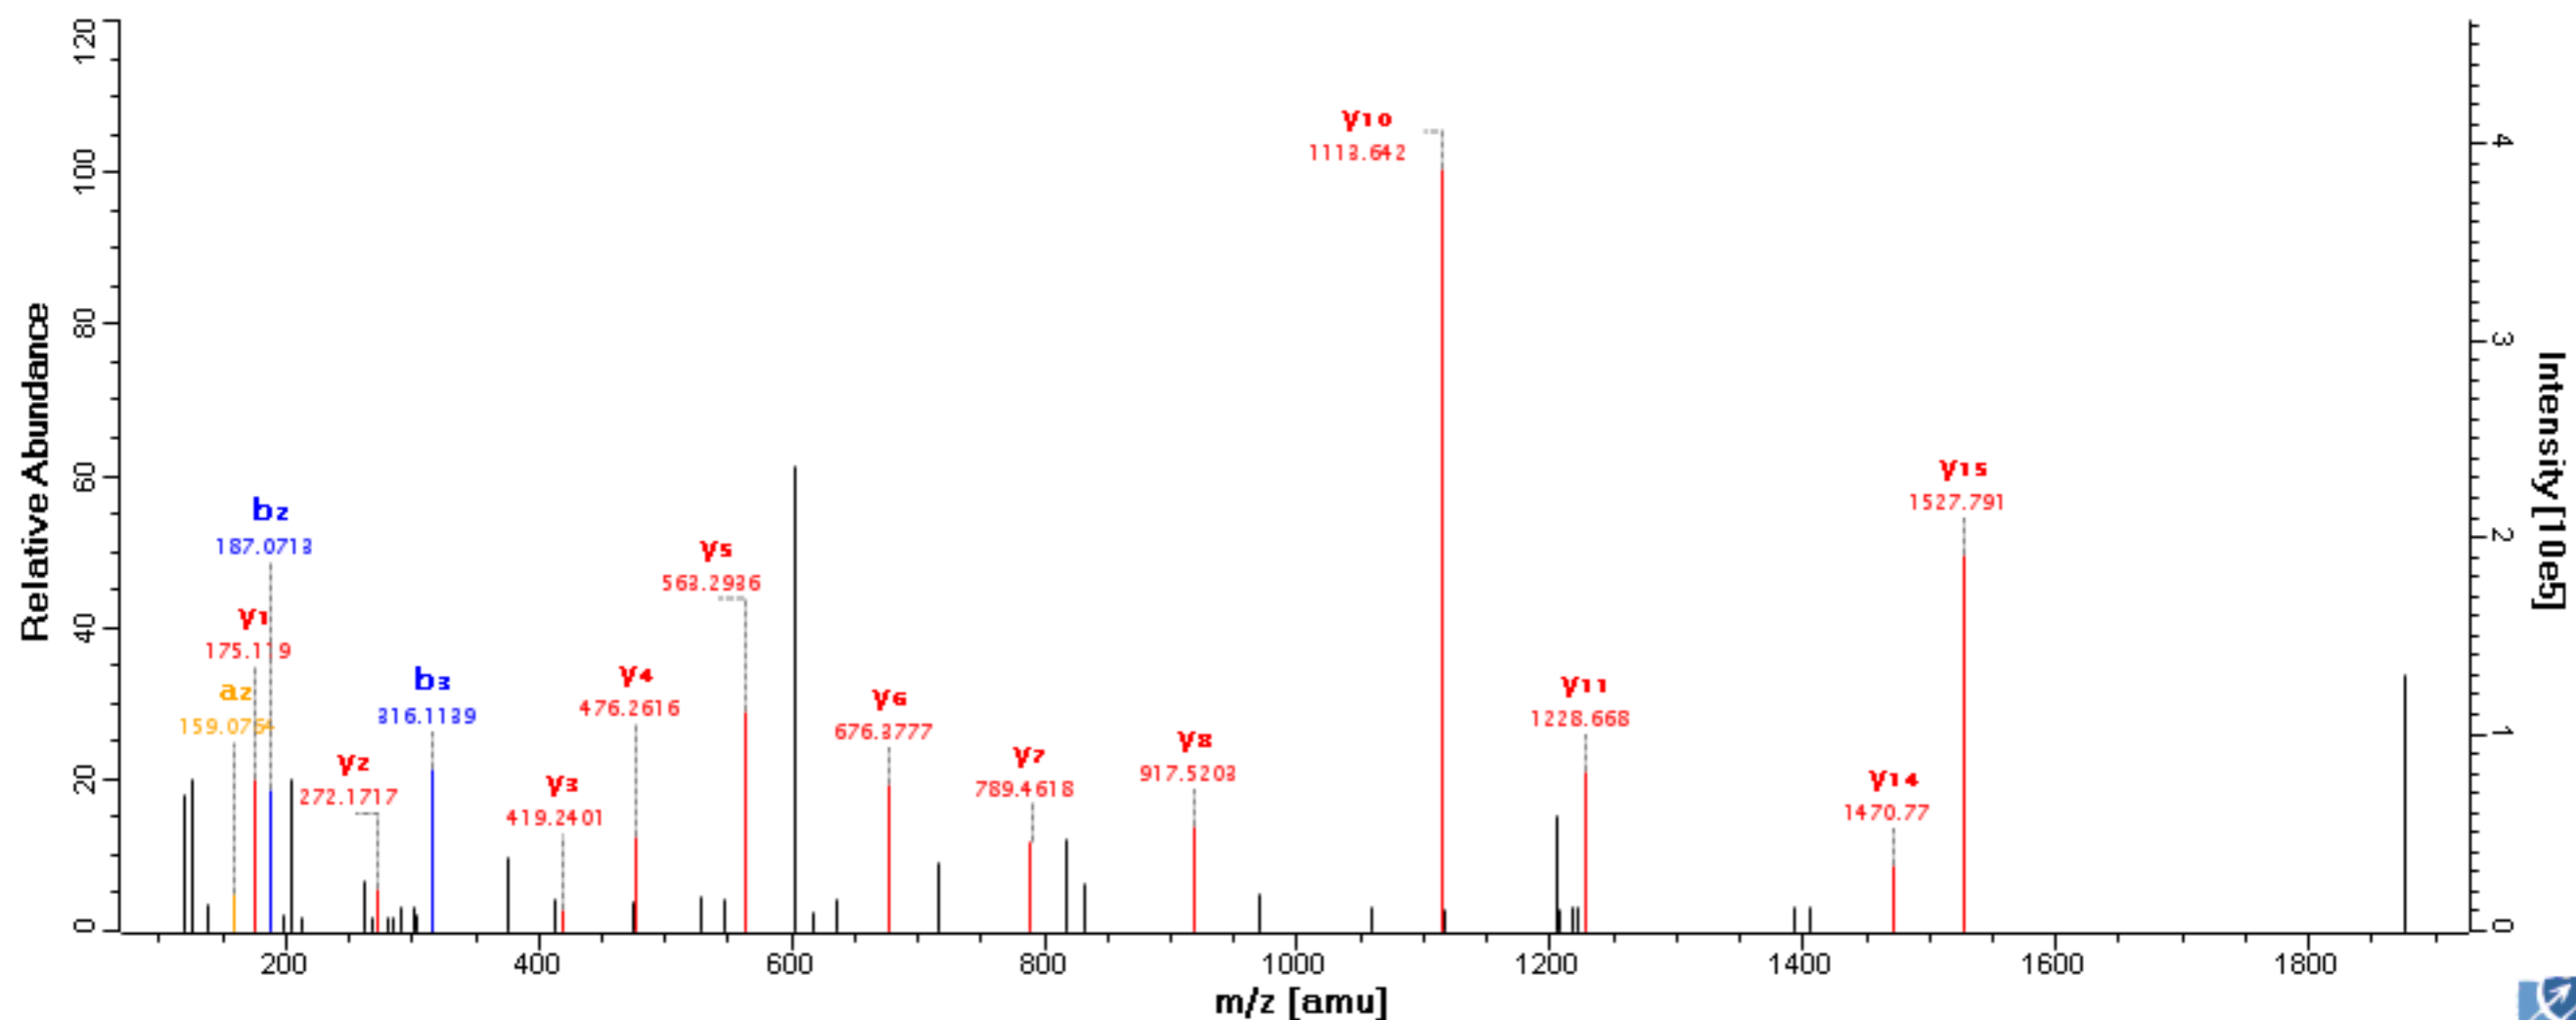

Source: Bibo\_20130531\_RM\_MSC07628\_1\_3  
 Scannumber: 48843  
 Protein: SAKS1; UBXN1; SAKS1; UBXN1; hCG\_1818009; LOC51035; UBXN1; Q04323-2; Q04323; Q04323-1; Q04323; E9PRQ7; B4DNC6; E9PJ81; Q05BV2; B4EOP8  
 Peptide Score: 101.96  
 Method: FTMS; HCD; 1

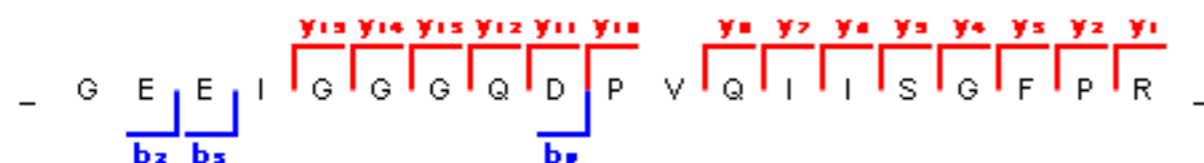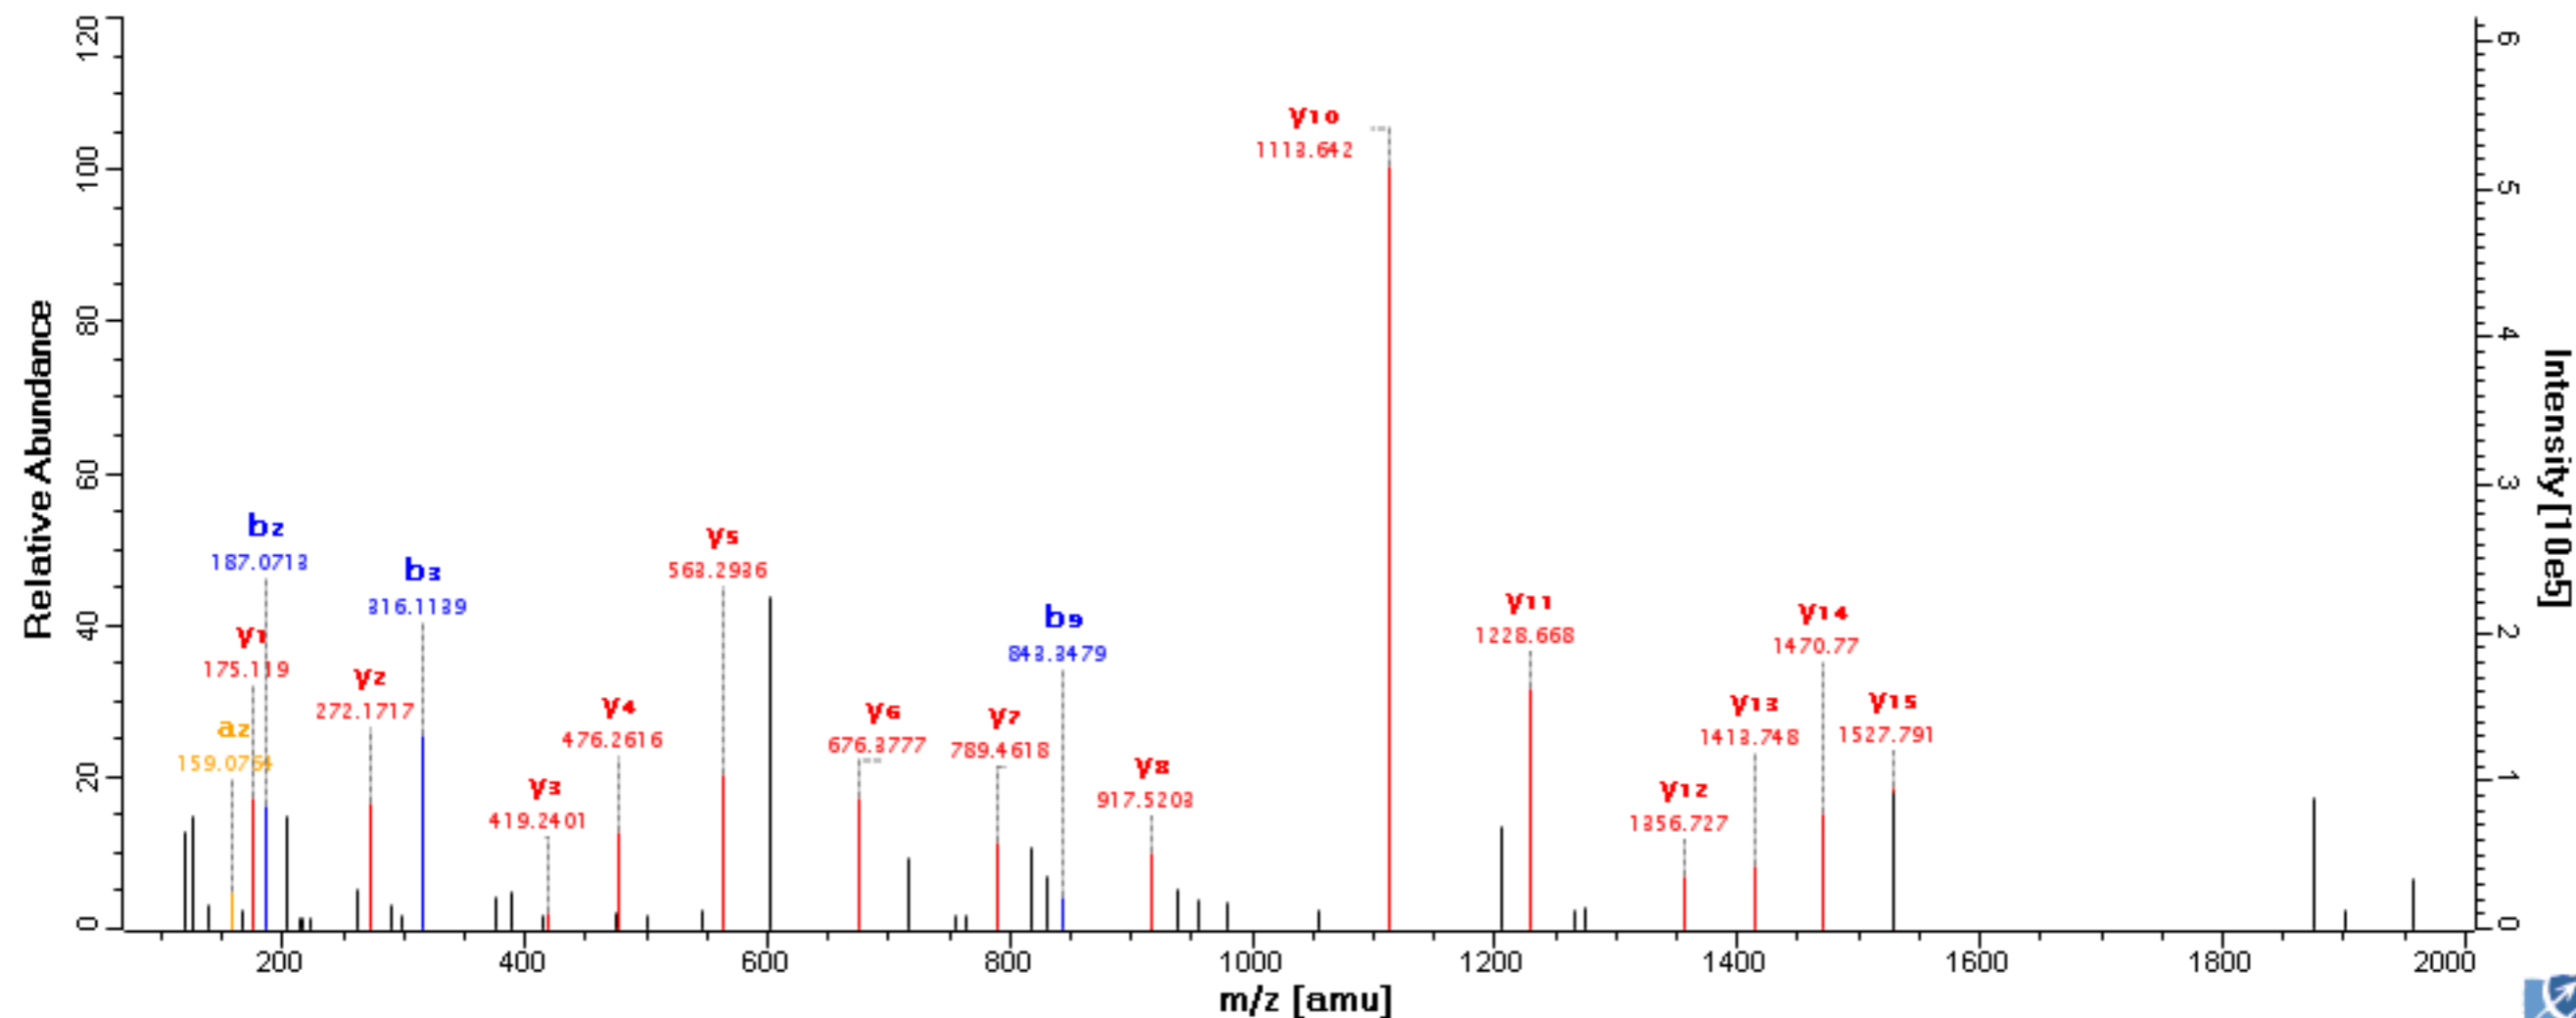

Source: Bibo\_20130531\_RM\_MSC07628\_1\_3  
 Scannumber: 50477  
 Protein: AURKA; RP5-1167H4.6-009; AIK; ARK1; AURA; AURKA; BTAK; STK15; STK6; A3KFJ1; O14965; B2R6Z3; B4DX16  
 Peptide Score: 127.37  
 Method: FTMS; HCD; 1

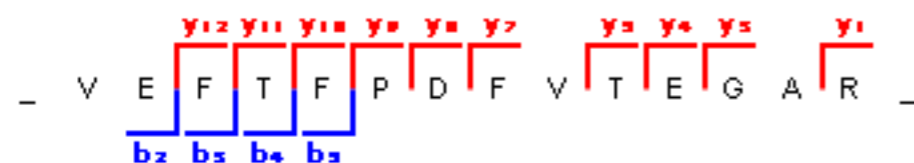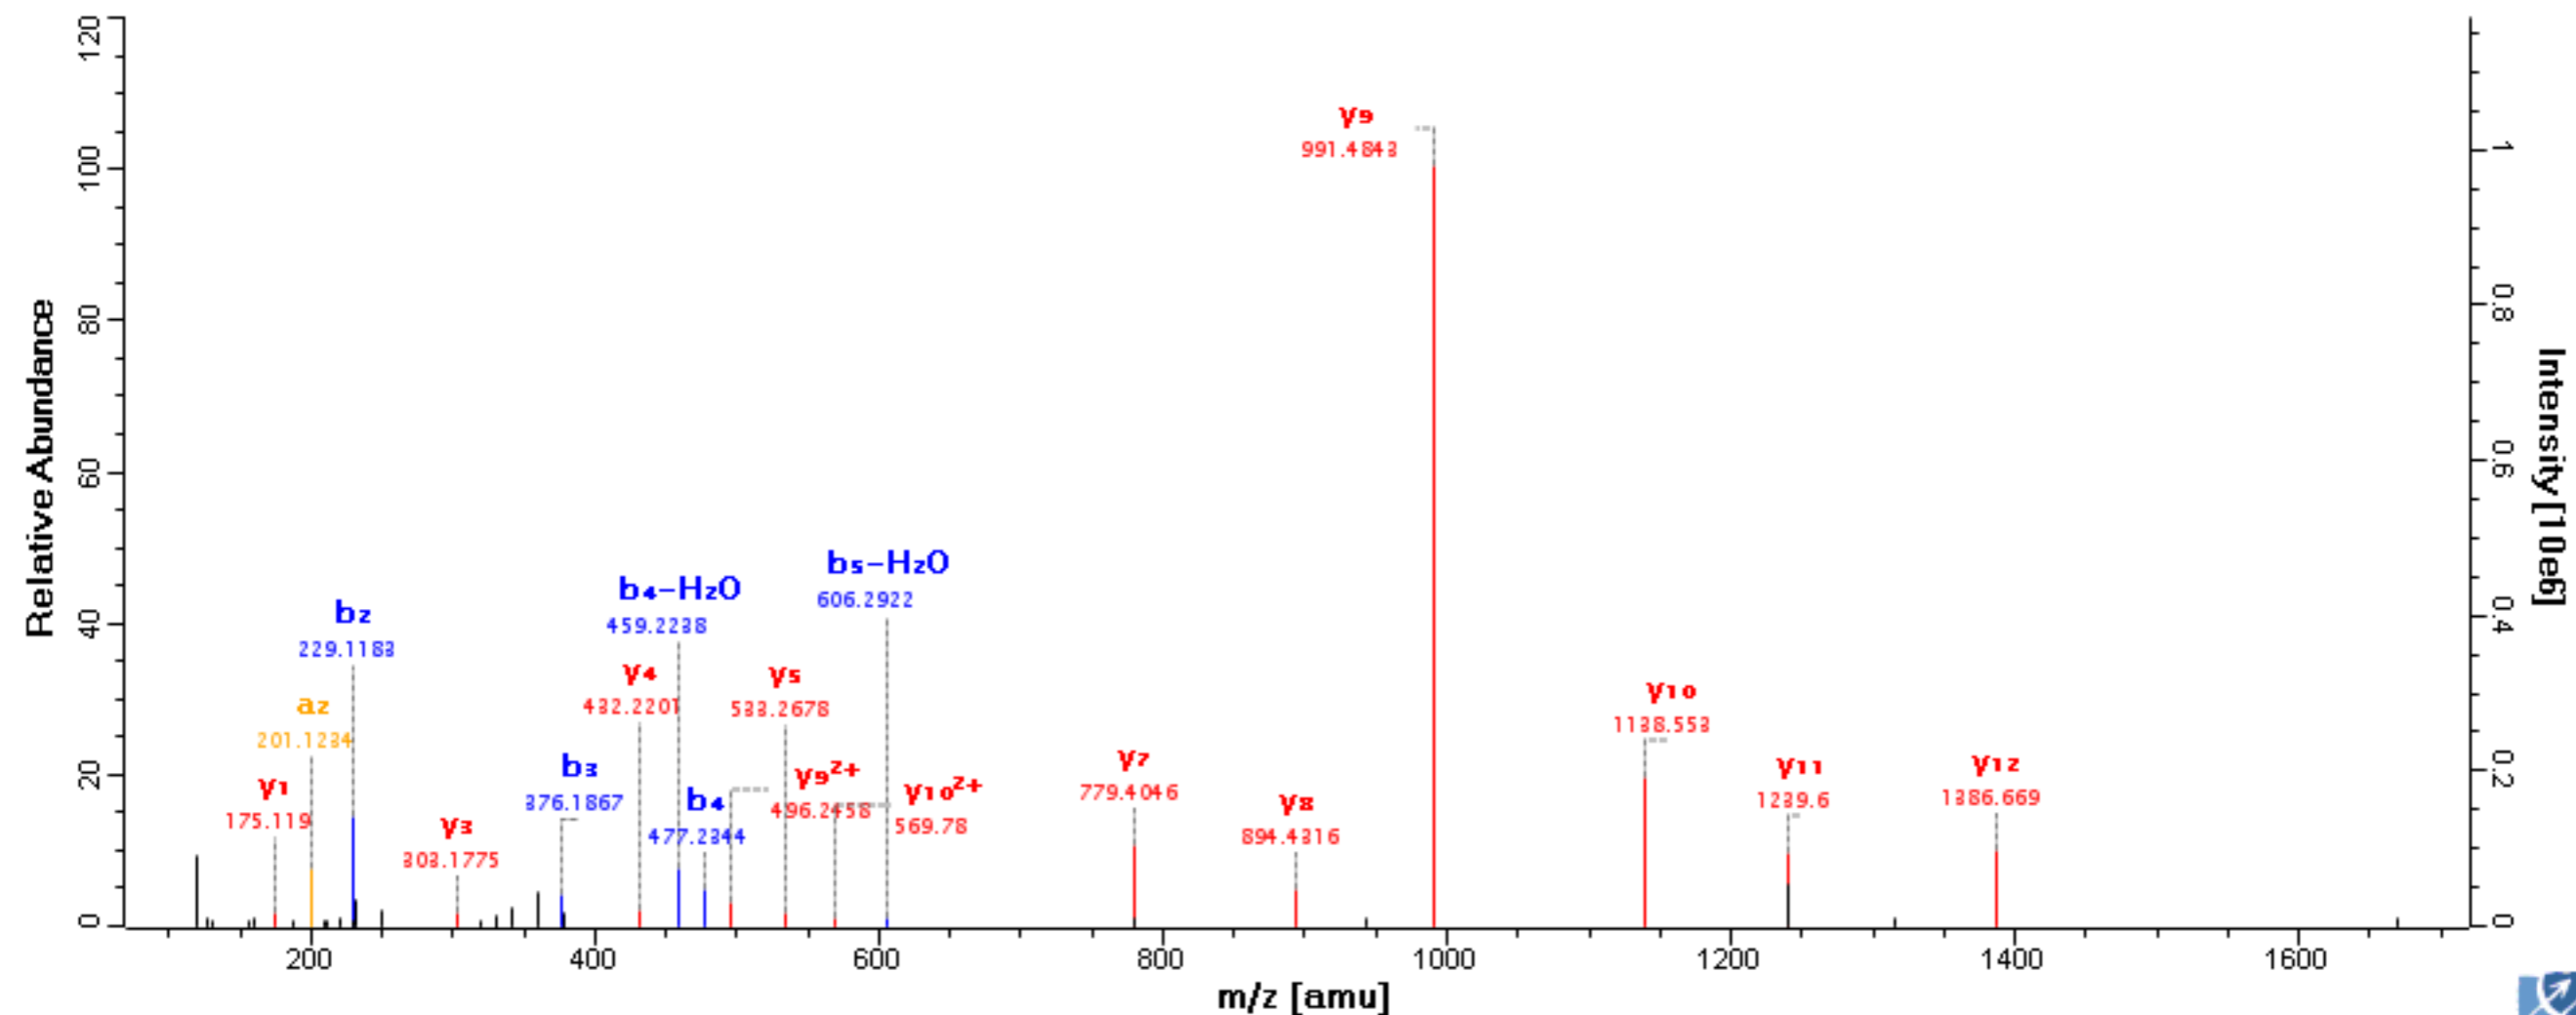

Source: Bibo\_20130531\_RM\_MSC07628\_1\_3  
Scannumber: 51726  
Protein: SRP14; P37108  
Peptide Score: 82.36  
Method: FTMS; HCD; 1

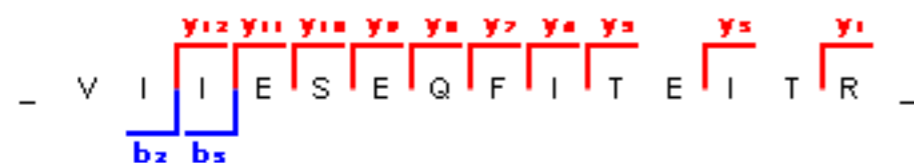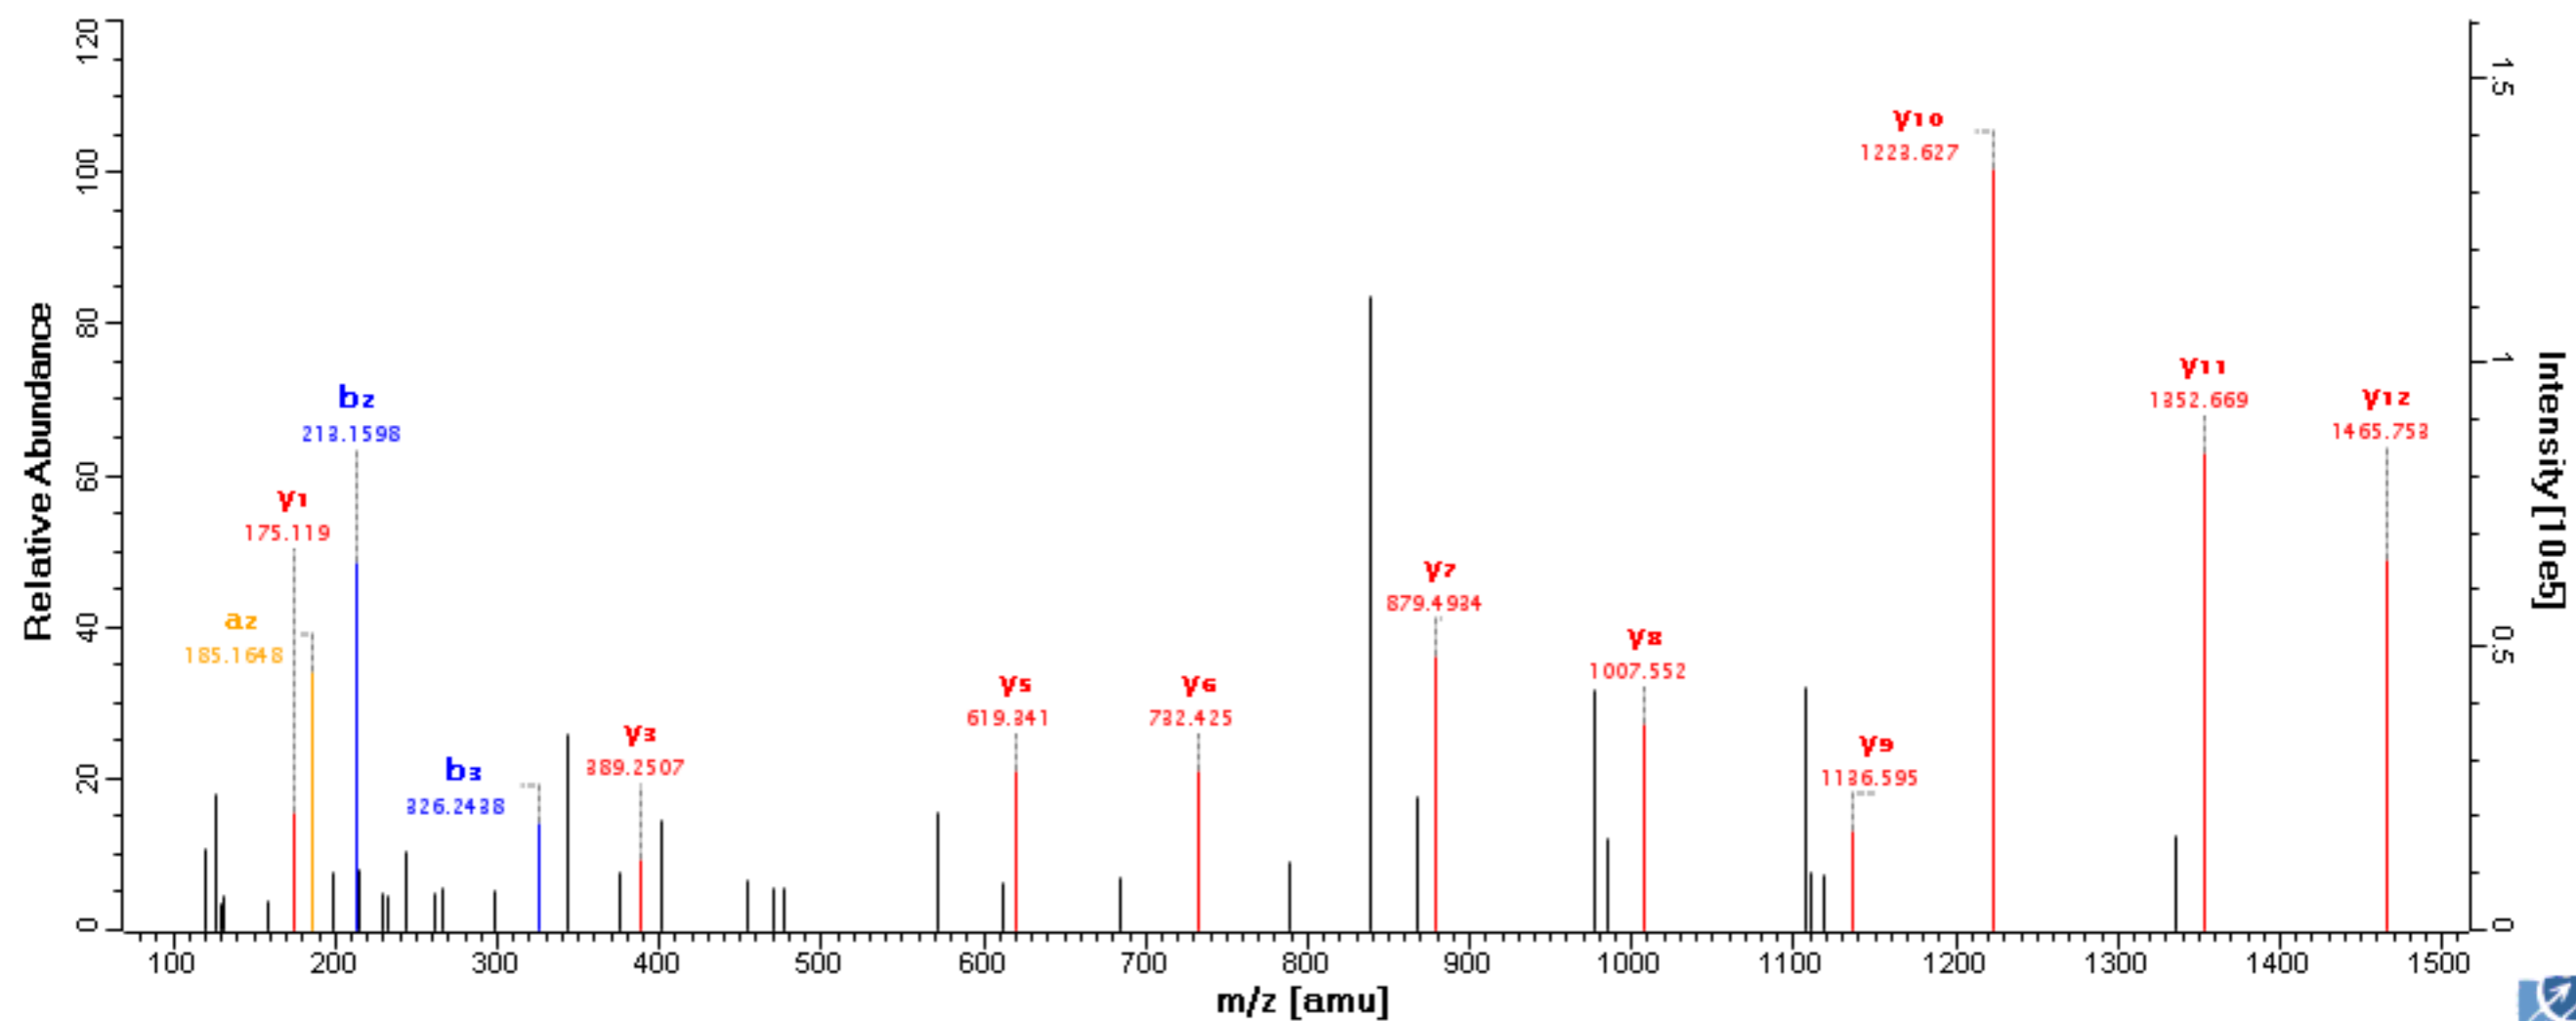

Source: Bibo\_20130531\_RM\_MSC07628\_1\_3  
 Scannumber: 51773  
 Protein: SRP14; P37108  
 Peptide Score: 105.17  
 Method: FTMS; HCD; 1

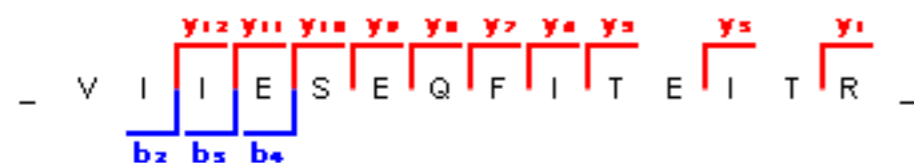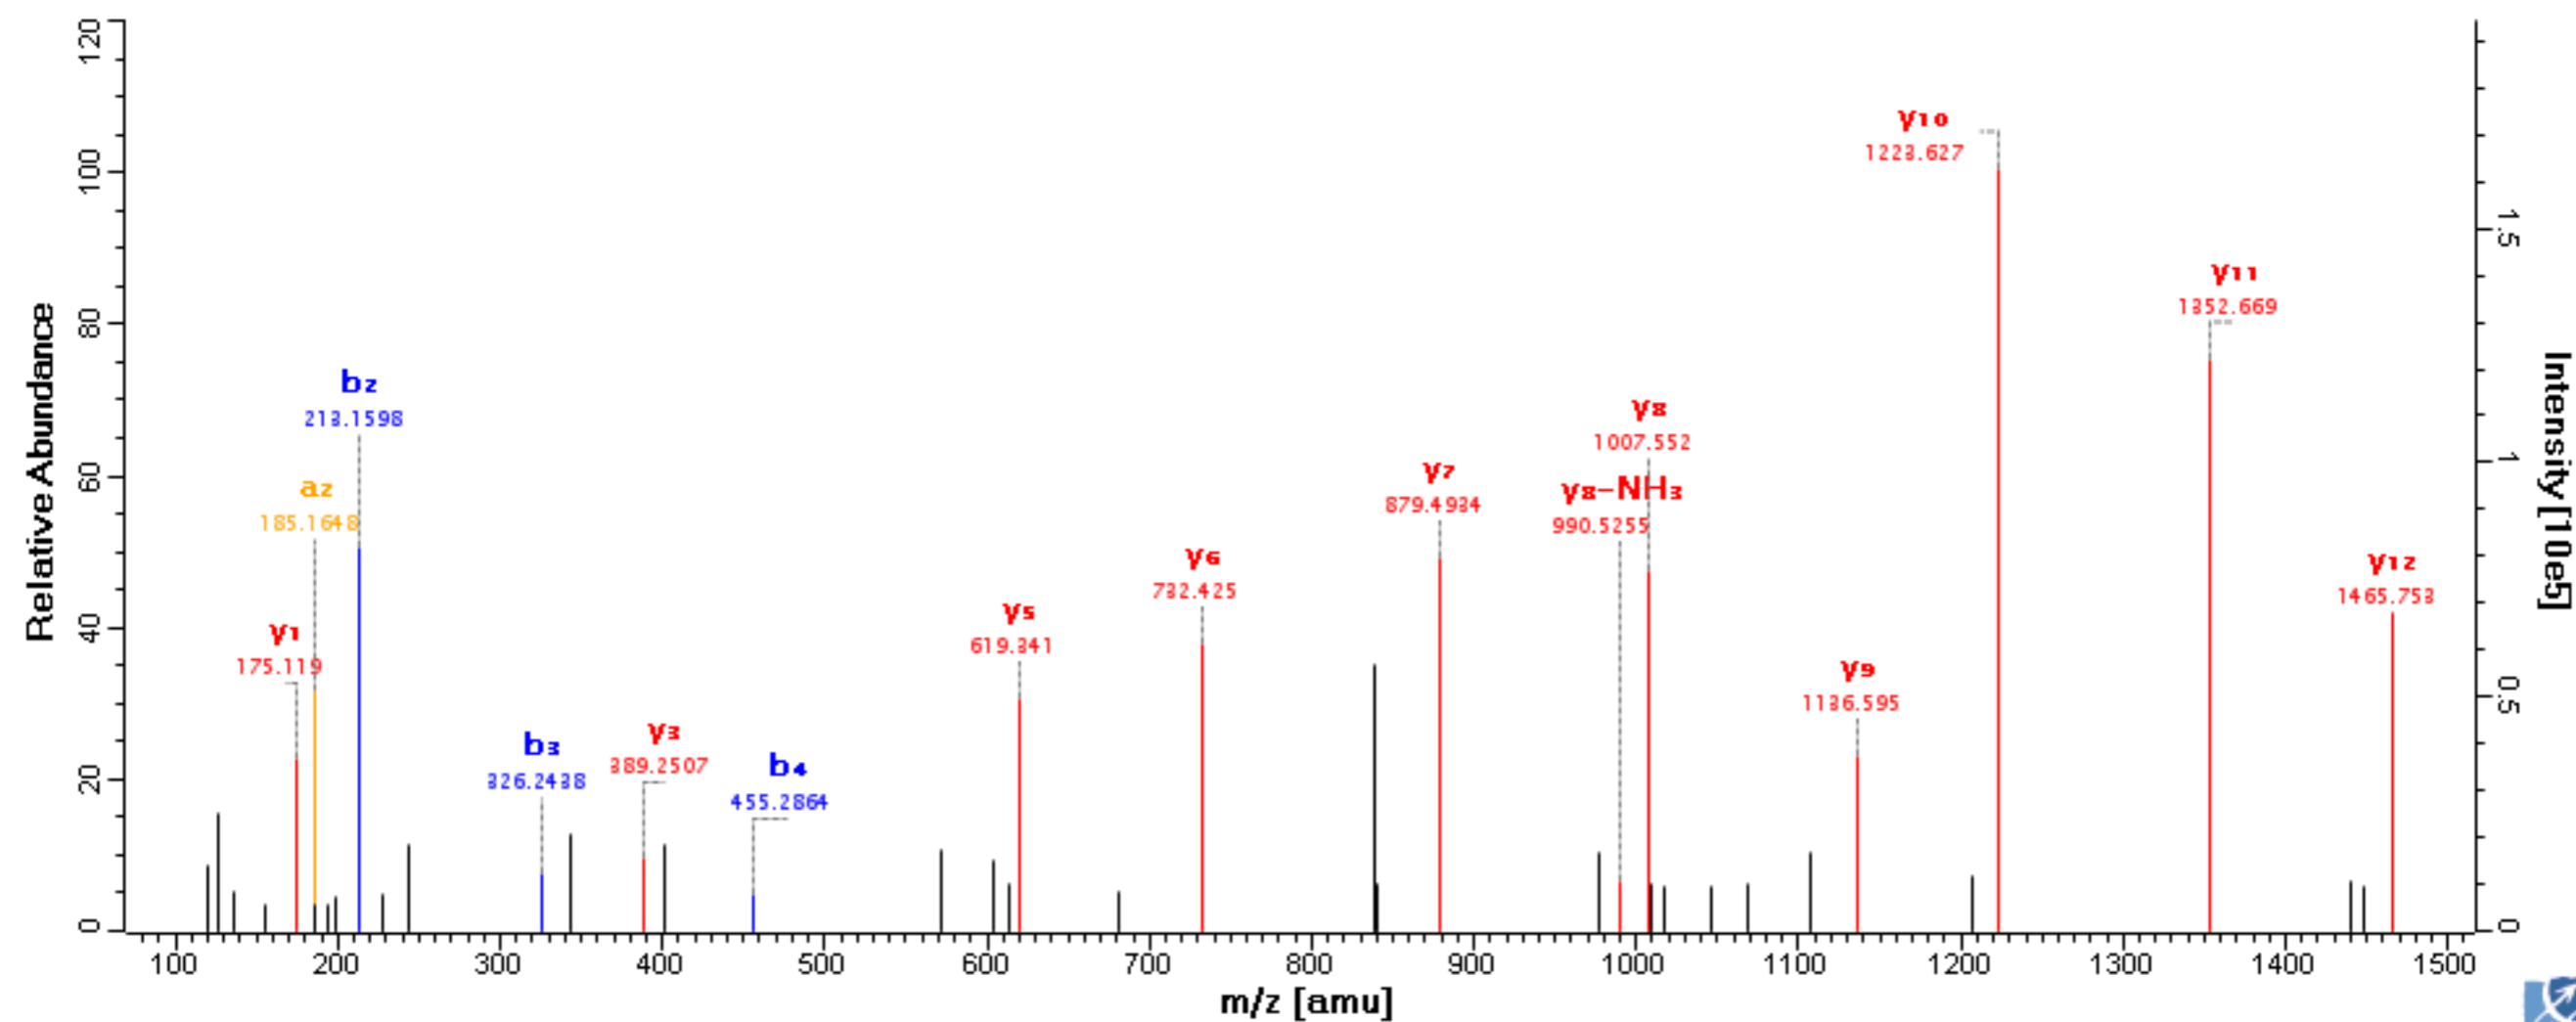

Source: Bibo\_20130531\_RM\_MSC07628\_1\_3  
 Scannumber: 54381  
 Protein: NPM; NPM1; NPM; NPM1; NPM1; P06748-1; P06748; A4ZU86; Q9BT19; P06748-2; P06748; Q9BYG9; Q9NX34; E5RI98  
 Peptide Score: 87.16  
 Method: FTMS; HCD; 1

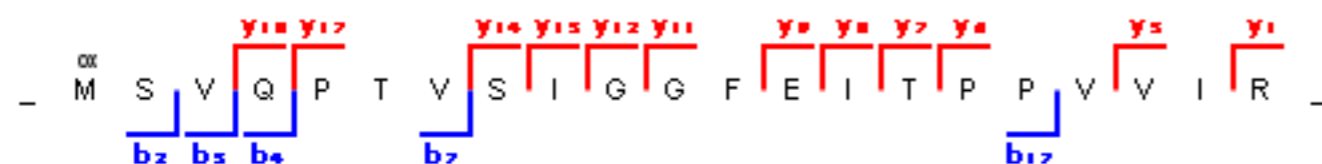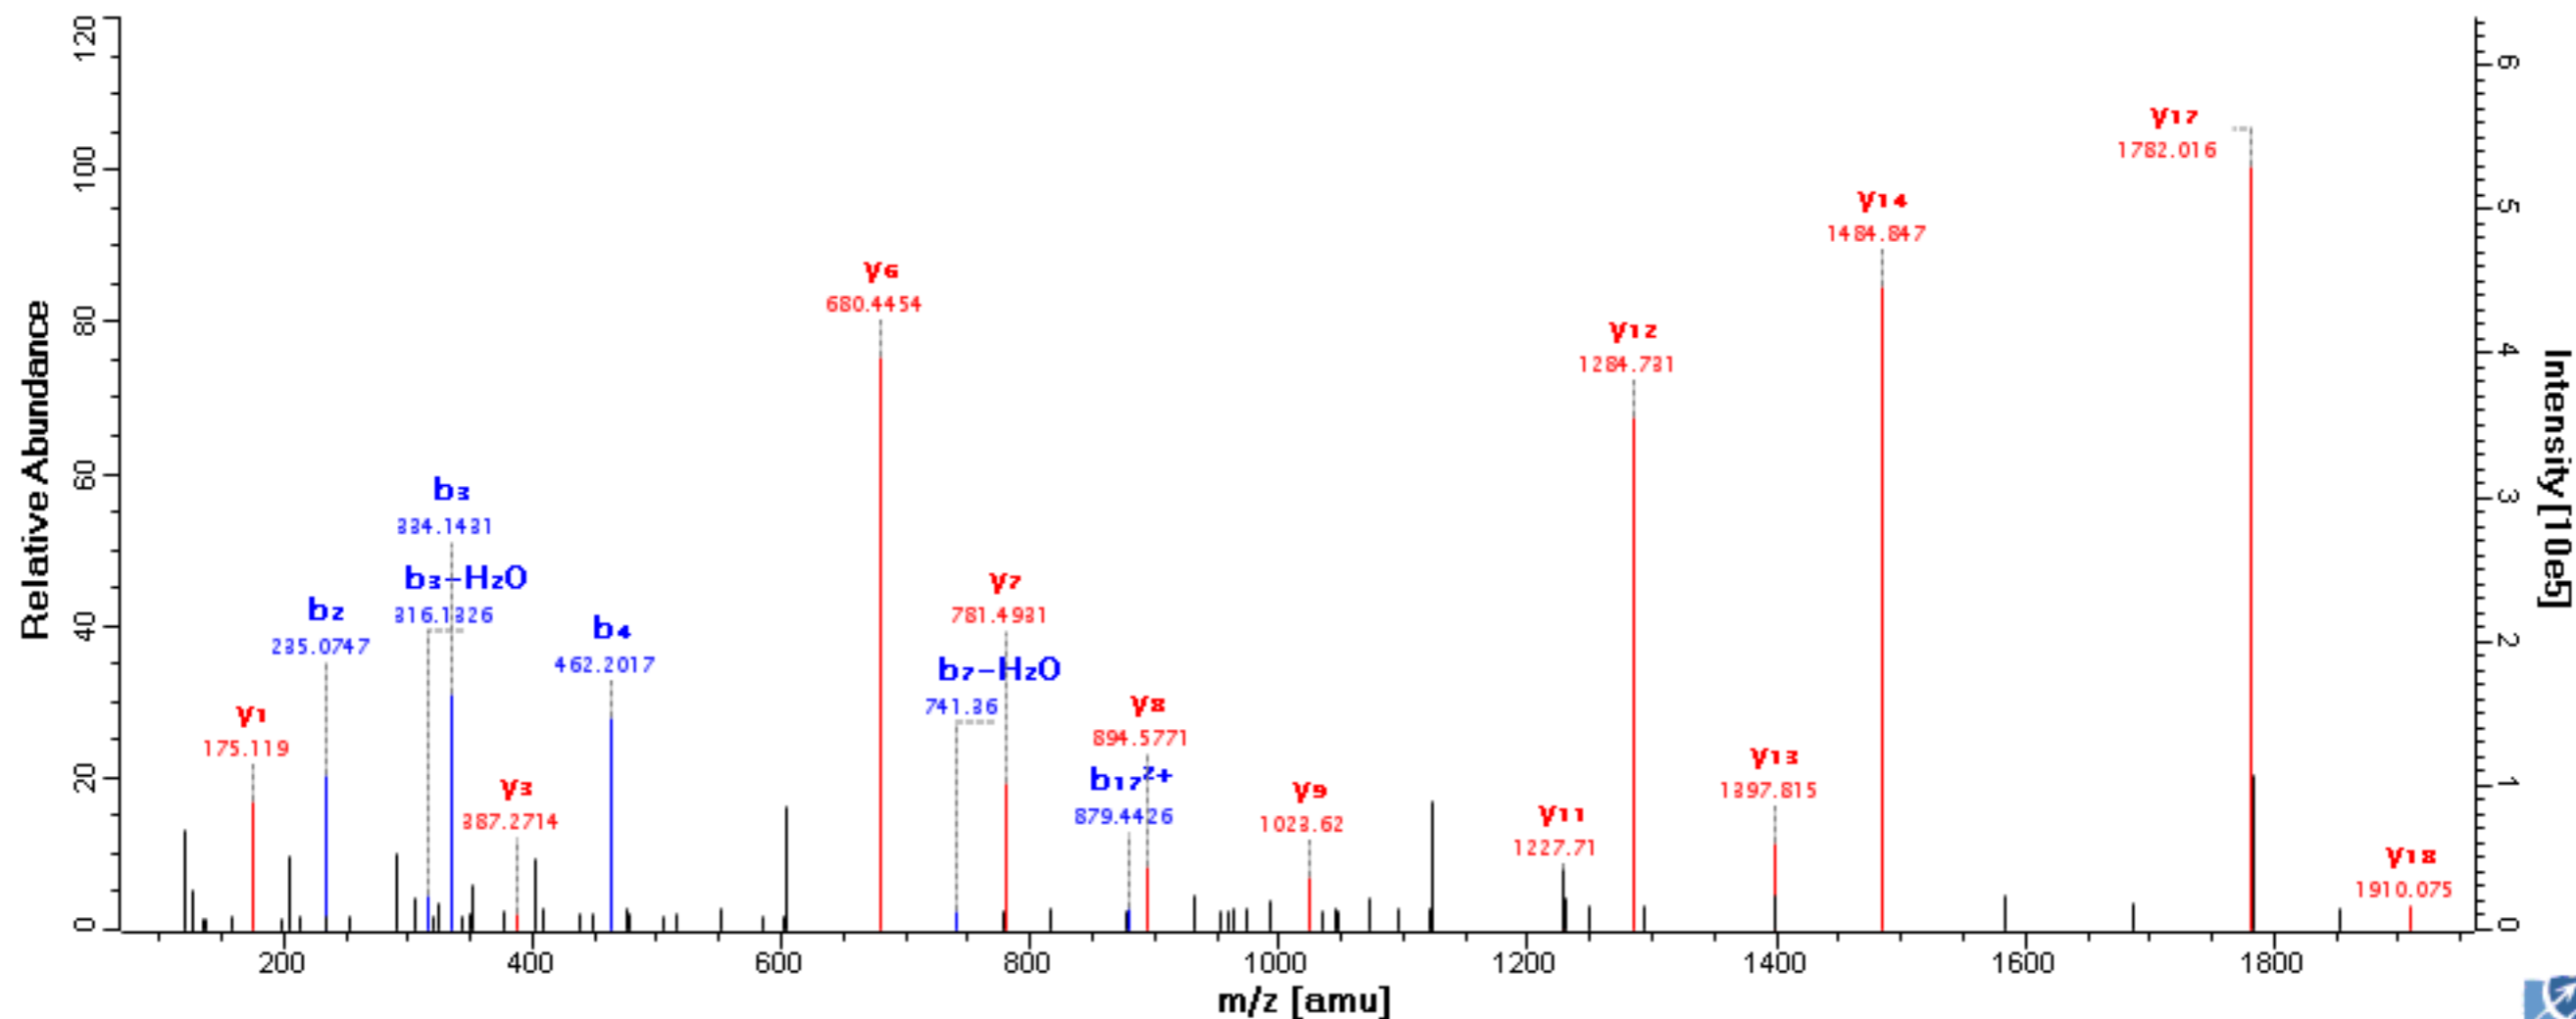

Source: Bibo\_20130531\_RM\_MSC07628\_4  
 Scannumber: 12226  
 Protein: CRYBG3; CRYBG3; Q68DQ2-1; Q68DQ2; Q68DQ2-2; Q68DQ2; C9J5N2; C9J659  
 Peptide Score: 97.8  
 Method: FTMS; HCD; 1

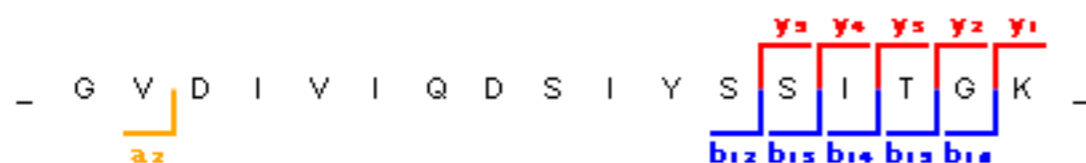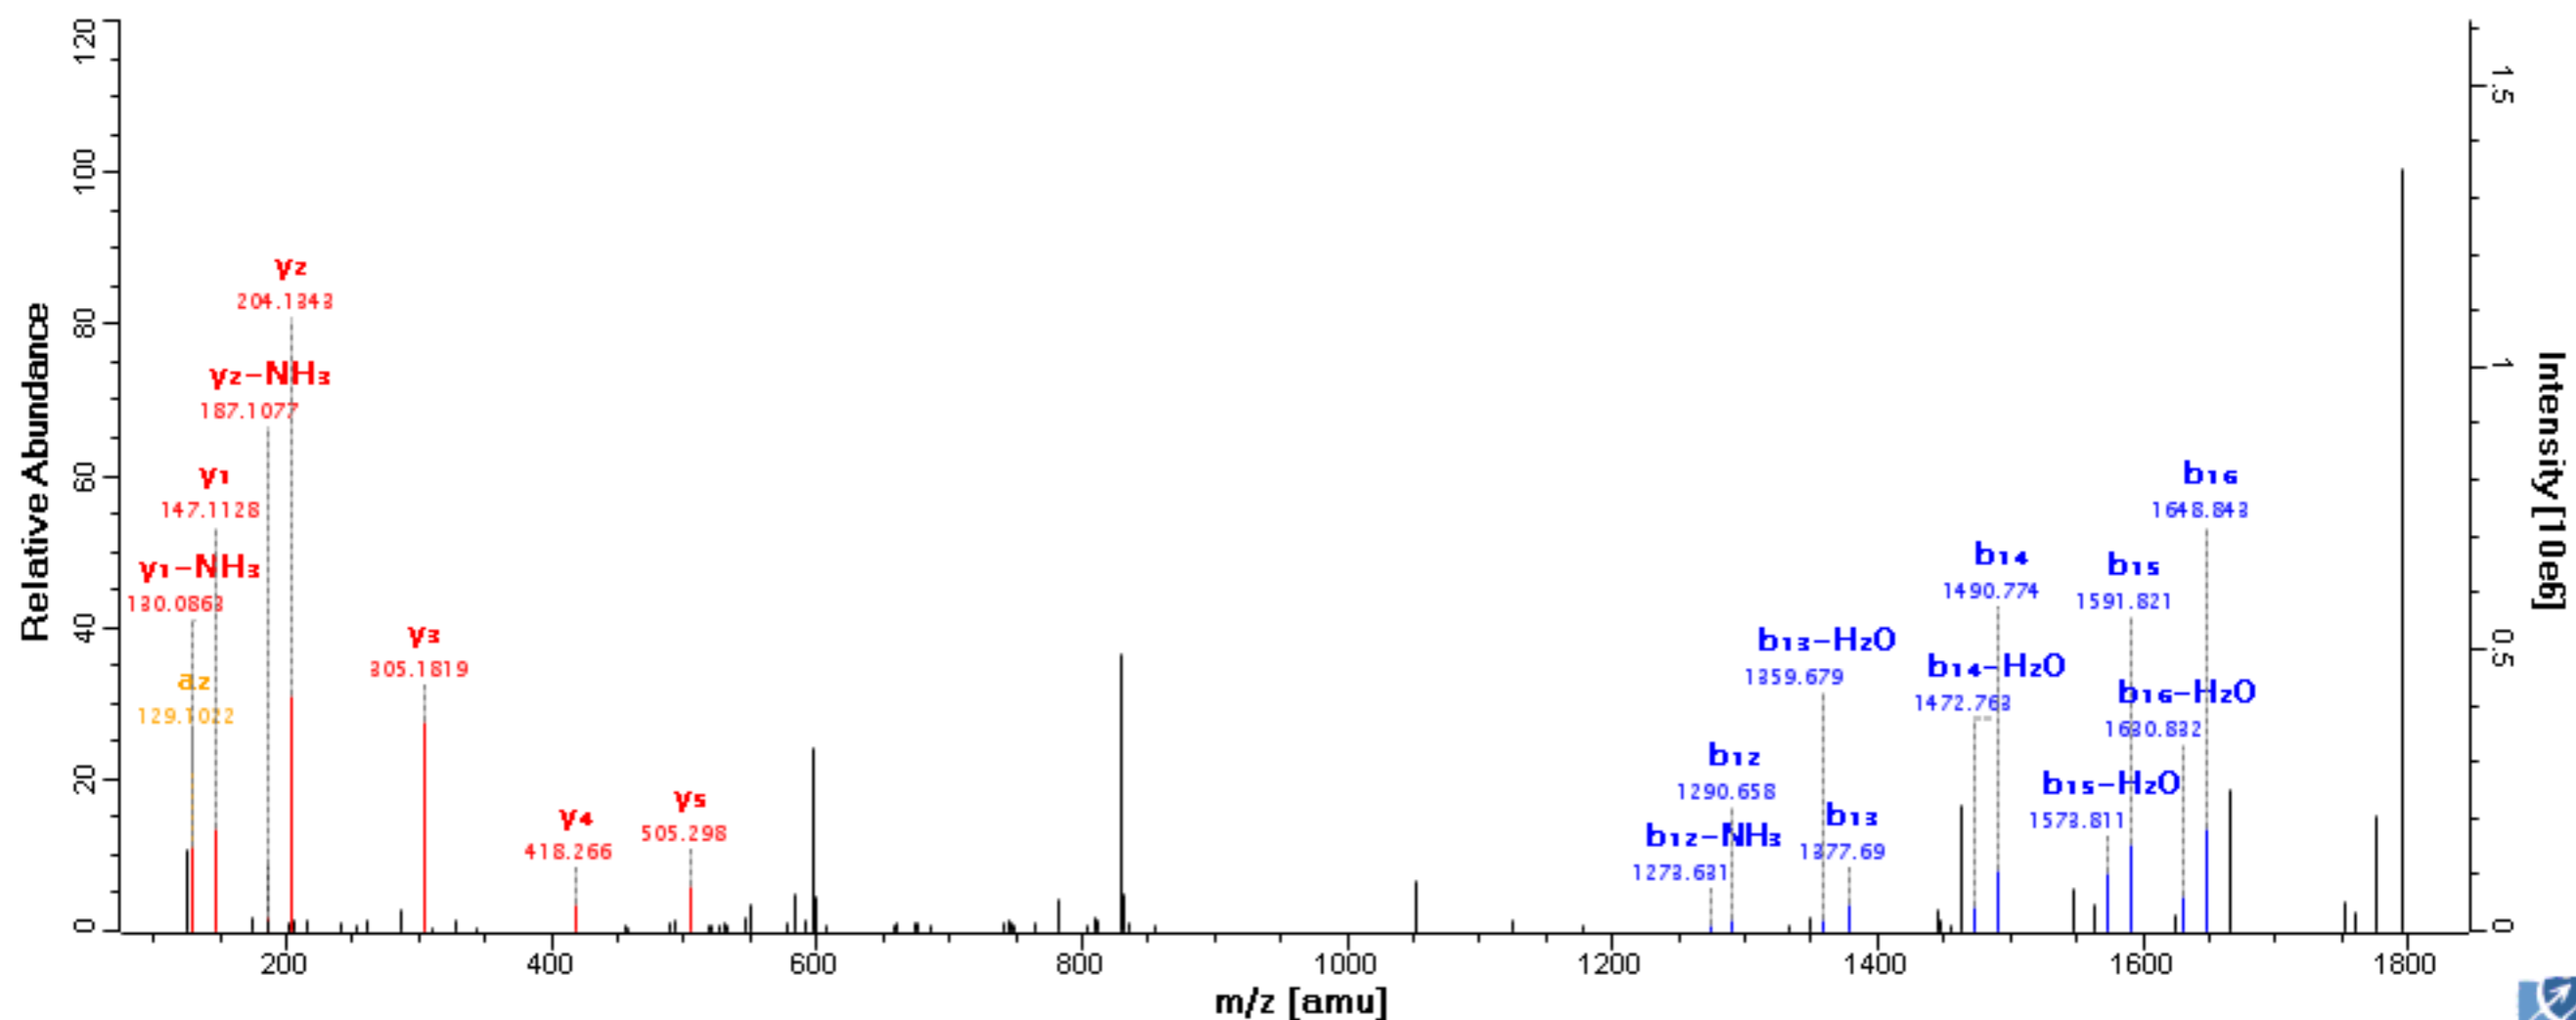

Source: Bibo\_20130531\_RM\_MSC07628\_4  
 Scannumber: 14977  
 Protein: E5RG04  
 Peptide Score: 105.03  
 Method: FTMS; HCD; 1

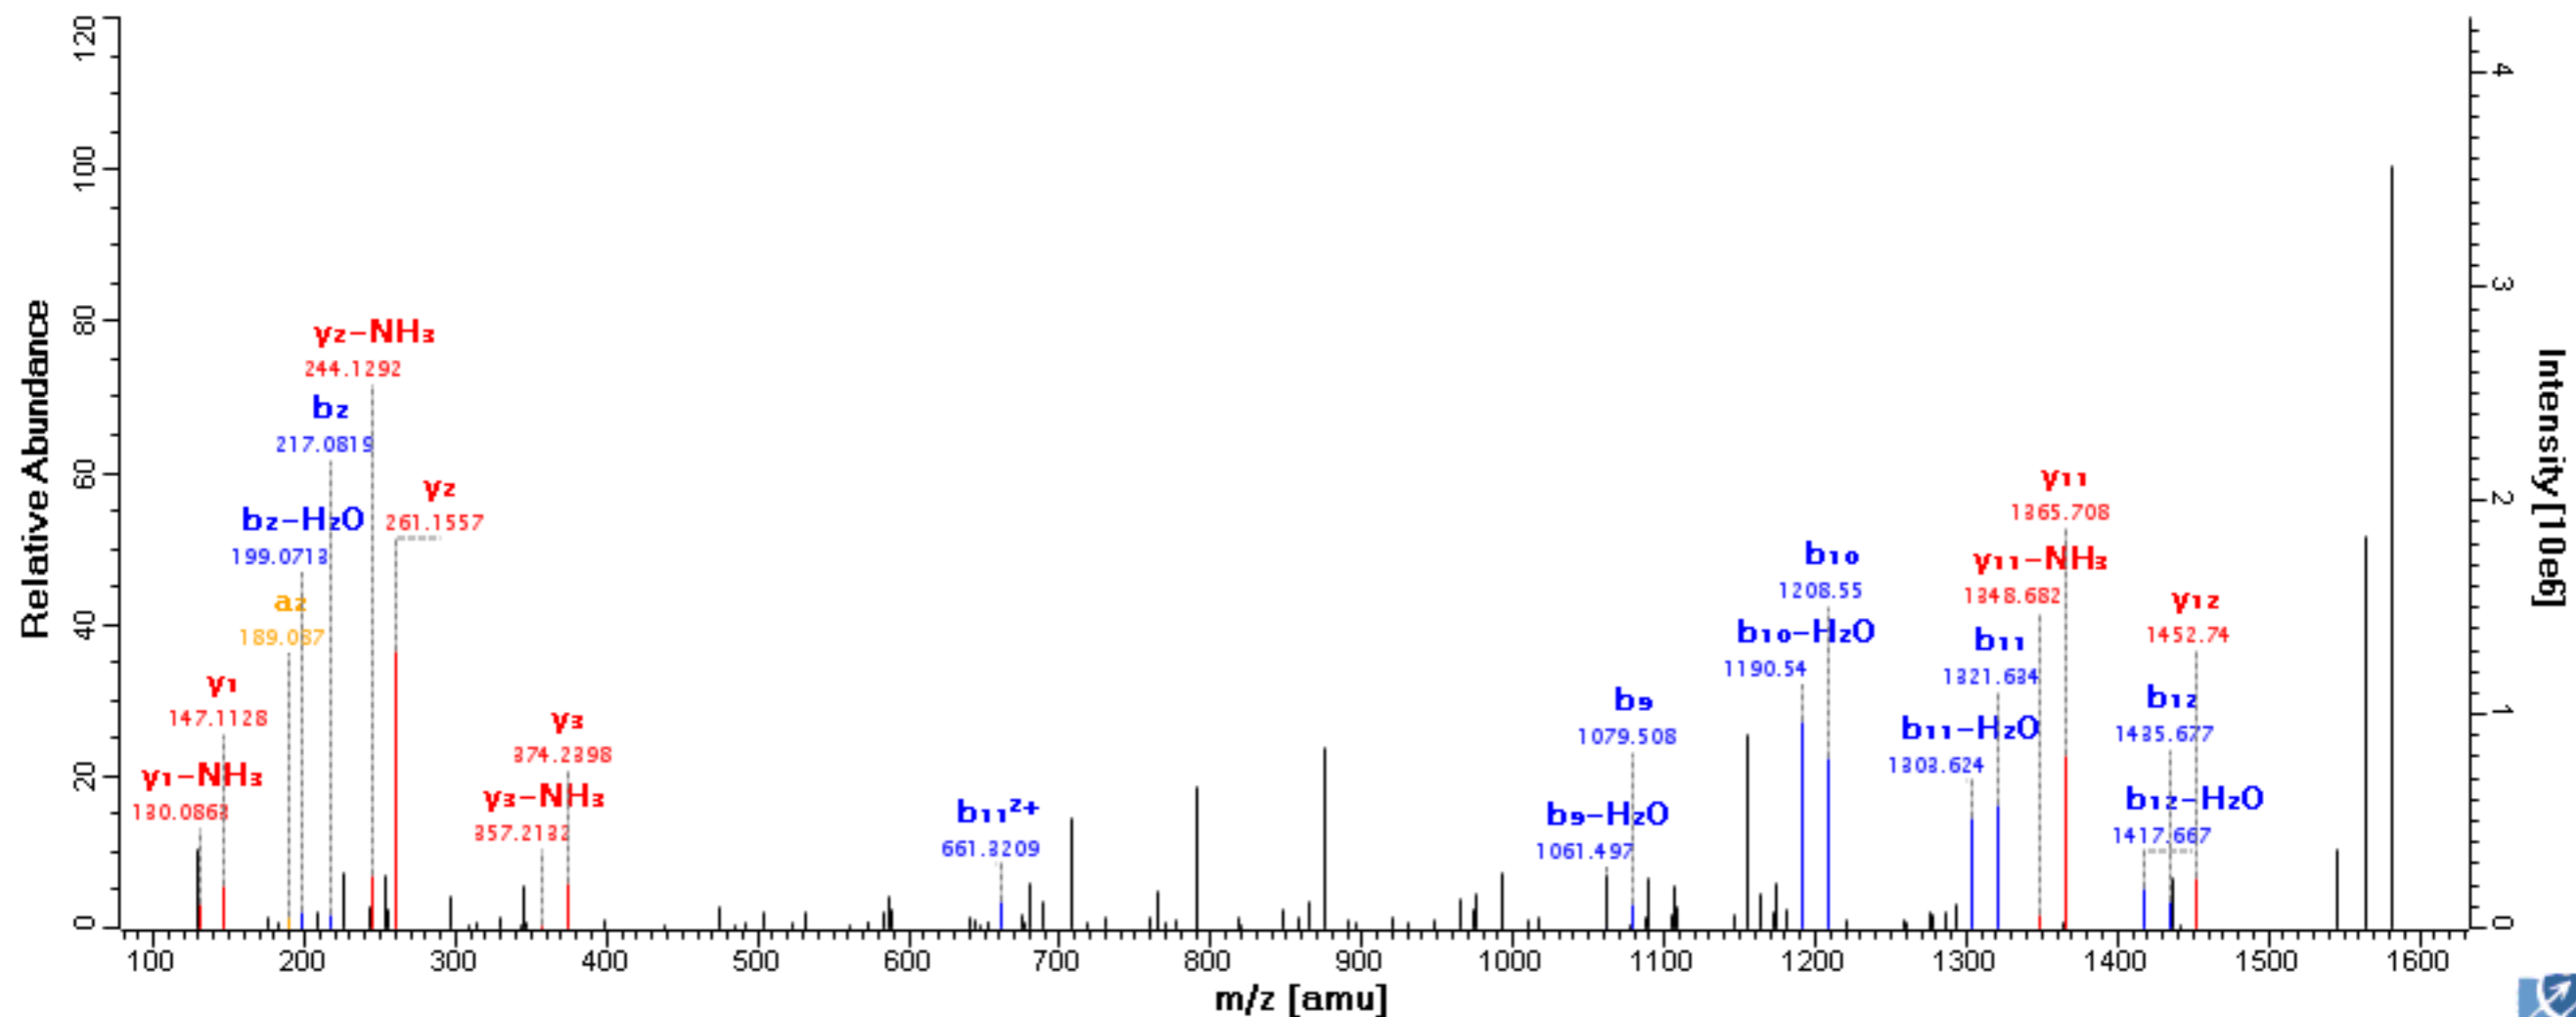

Source: Bibo\_20130531\_RM\_MSC07628\_4  
 Scannumber: 15189  
 Protein: E5RG04  
 Peptide Score: 115.33  
 Method: FTMS; HCD; 1

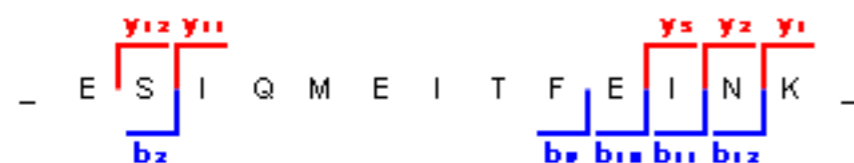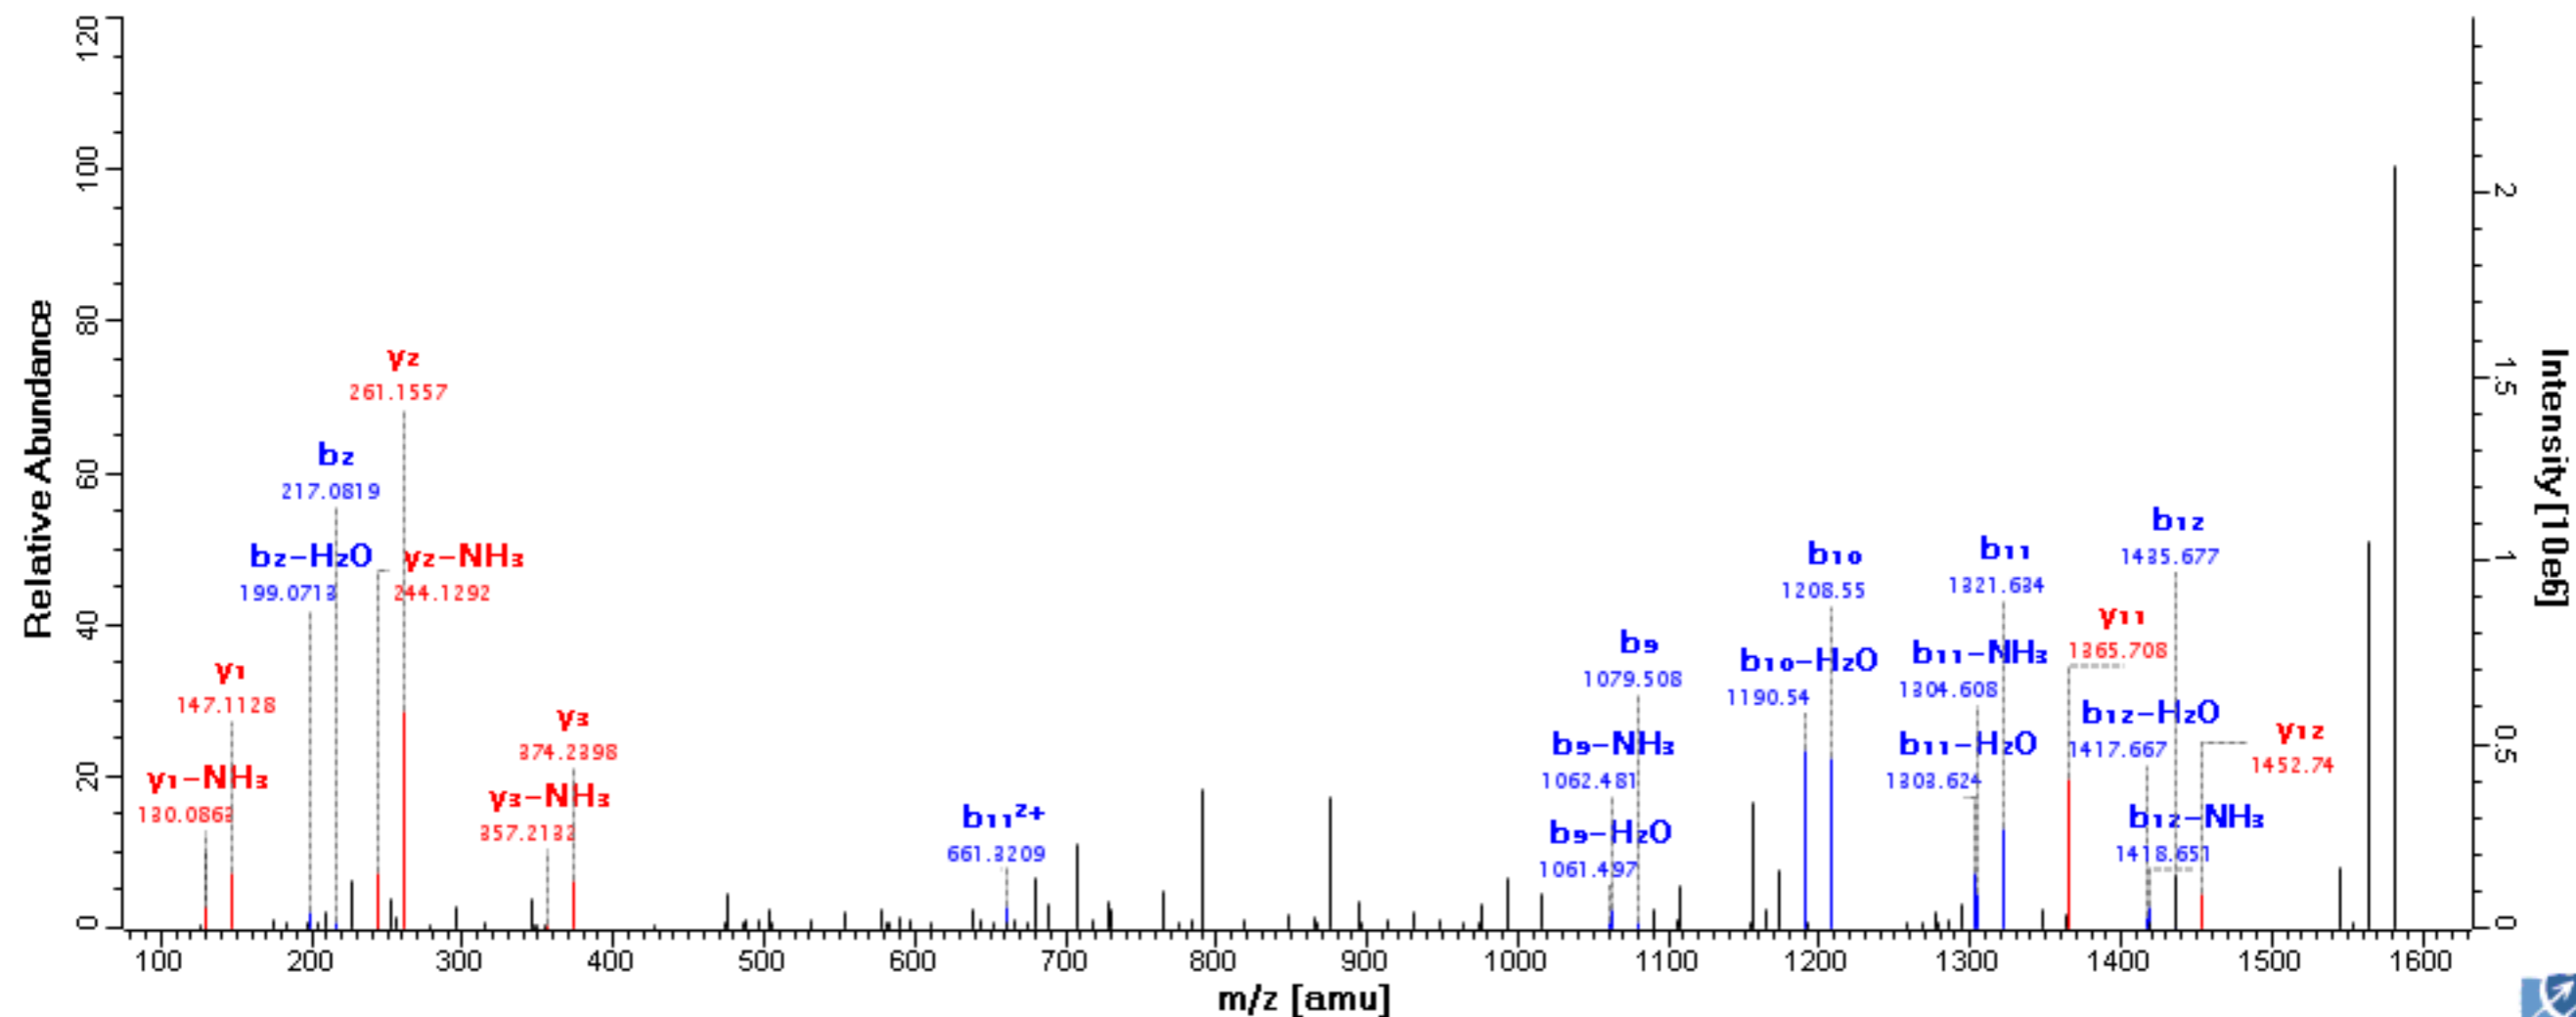

Source: Bibo\_20130531\_RM\_MSC07628\_4  
 Scannumber: 15951  
 Protein: UBCH5C; UBE2D3; UBCH5C; UBE2D3; P61077-2; P61077; P61077-1; P61077; D6RA11; D6RI23; D6R980; D6RGD0; D6R933; D6R9F6  
 Peptide Score: 123.86  
 Method: FTMS; HCD; 1

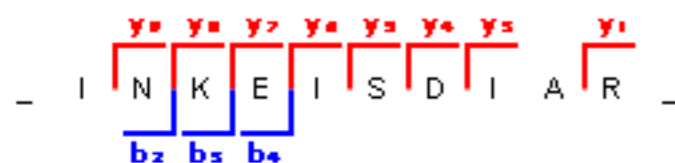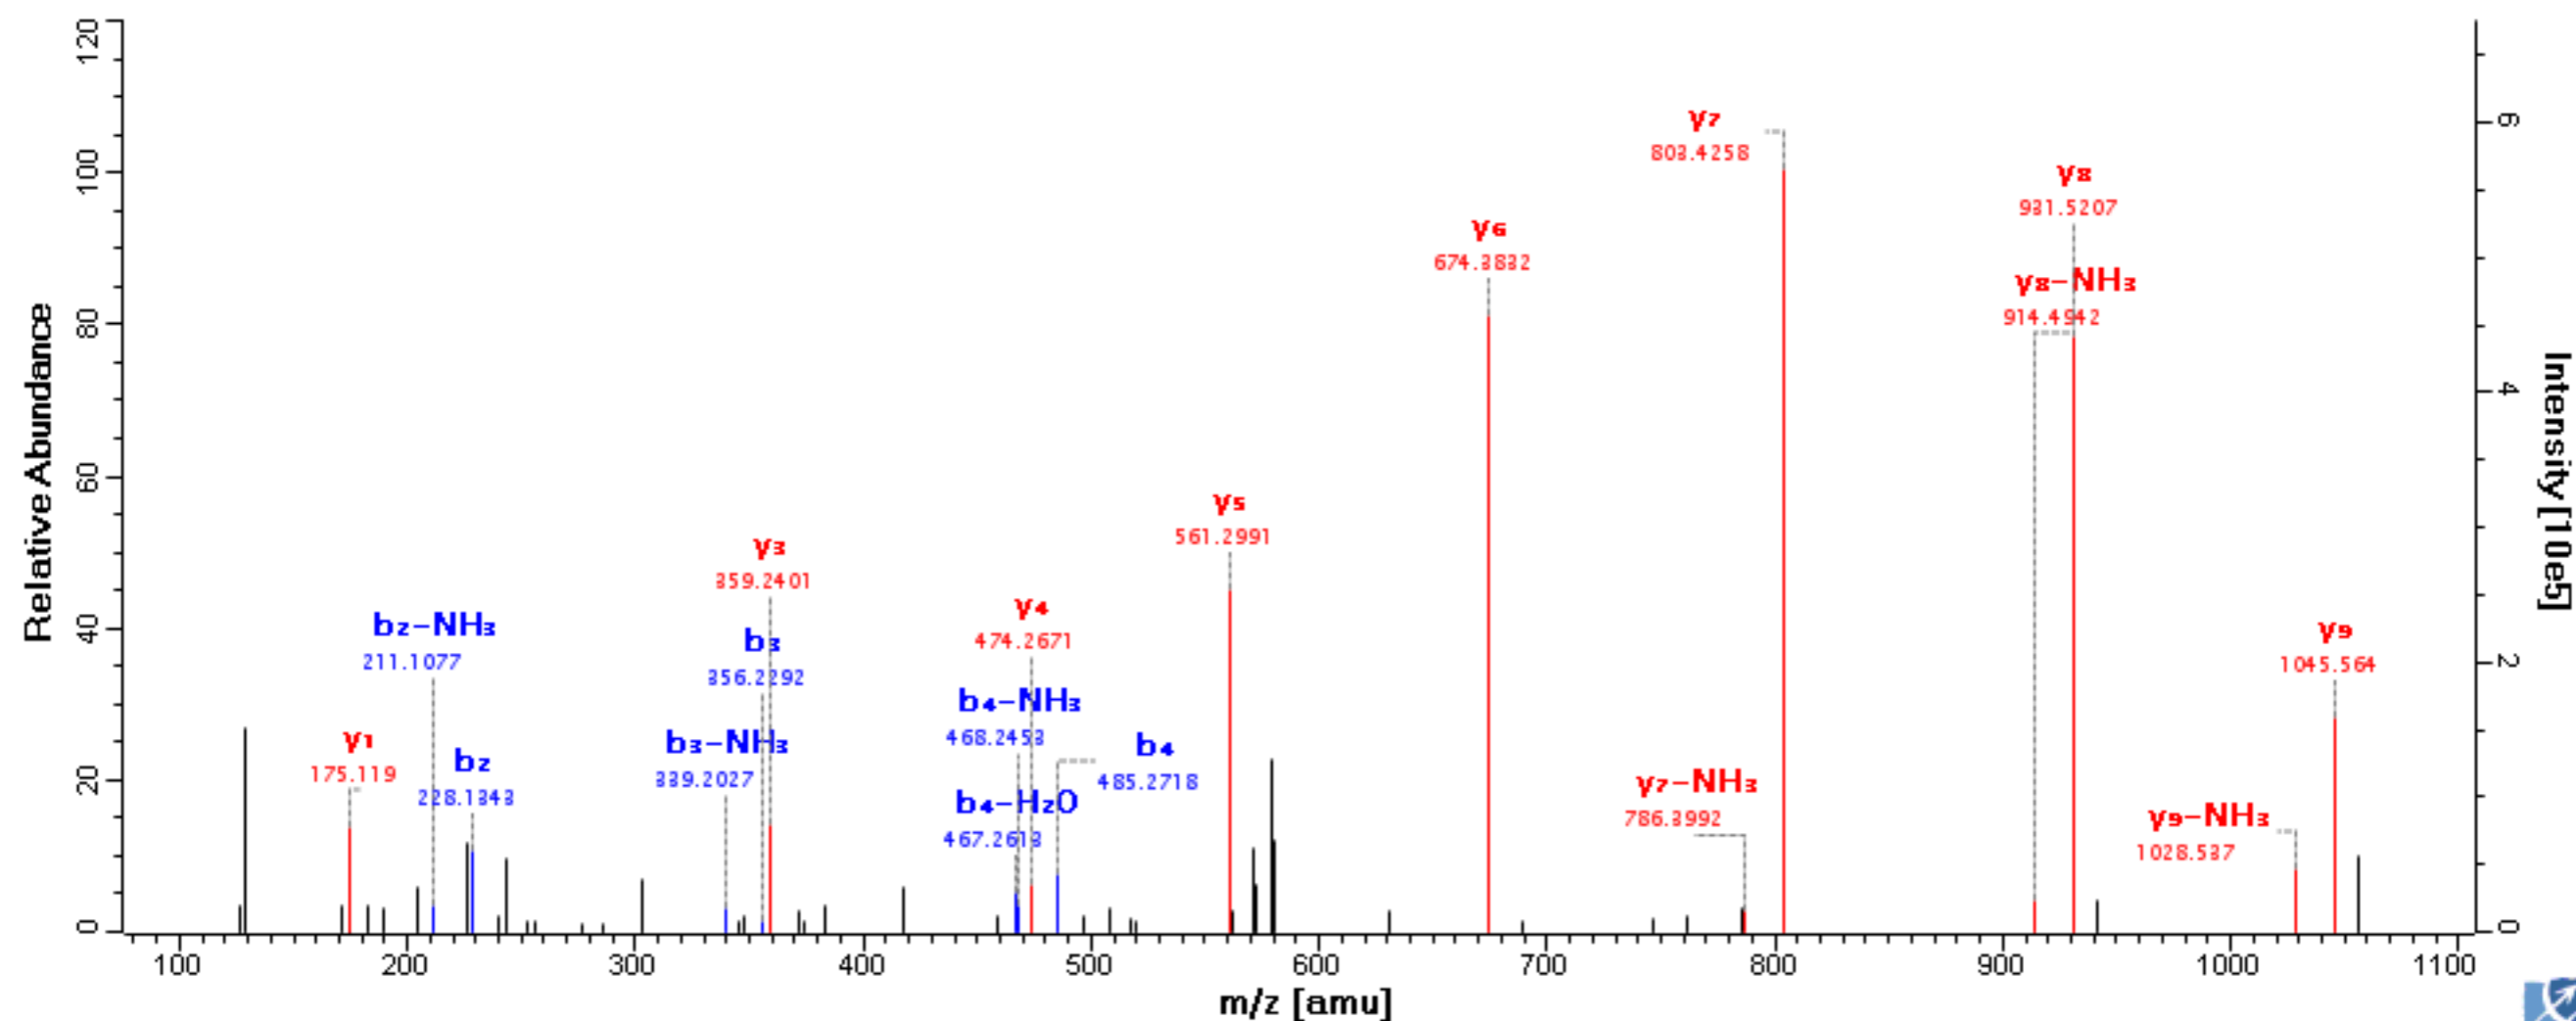

Source: Bibo\_20130531\_RM\_MSC07628\_4  
 Scannumber: 17018  
 Protein: RBM4; RBM4A; Q9BWF3-2; Q9BWF3  
 Peptide Score: 87.31  
 Method: FTMS; HCD; 1

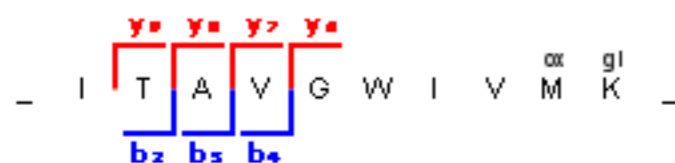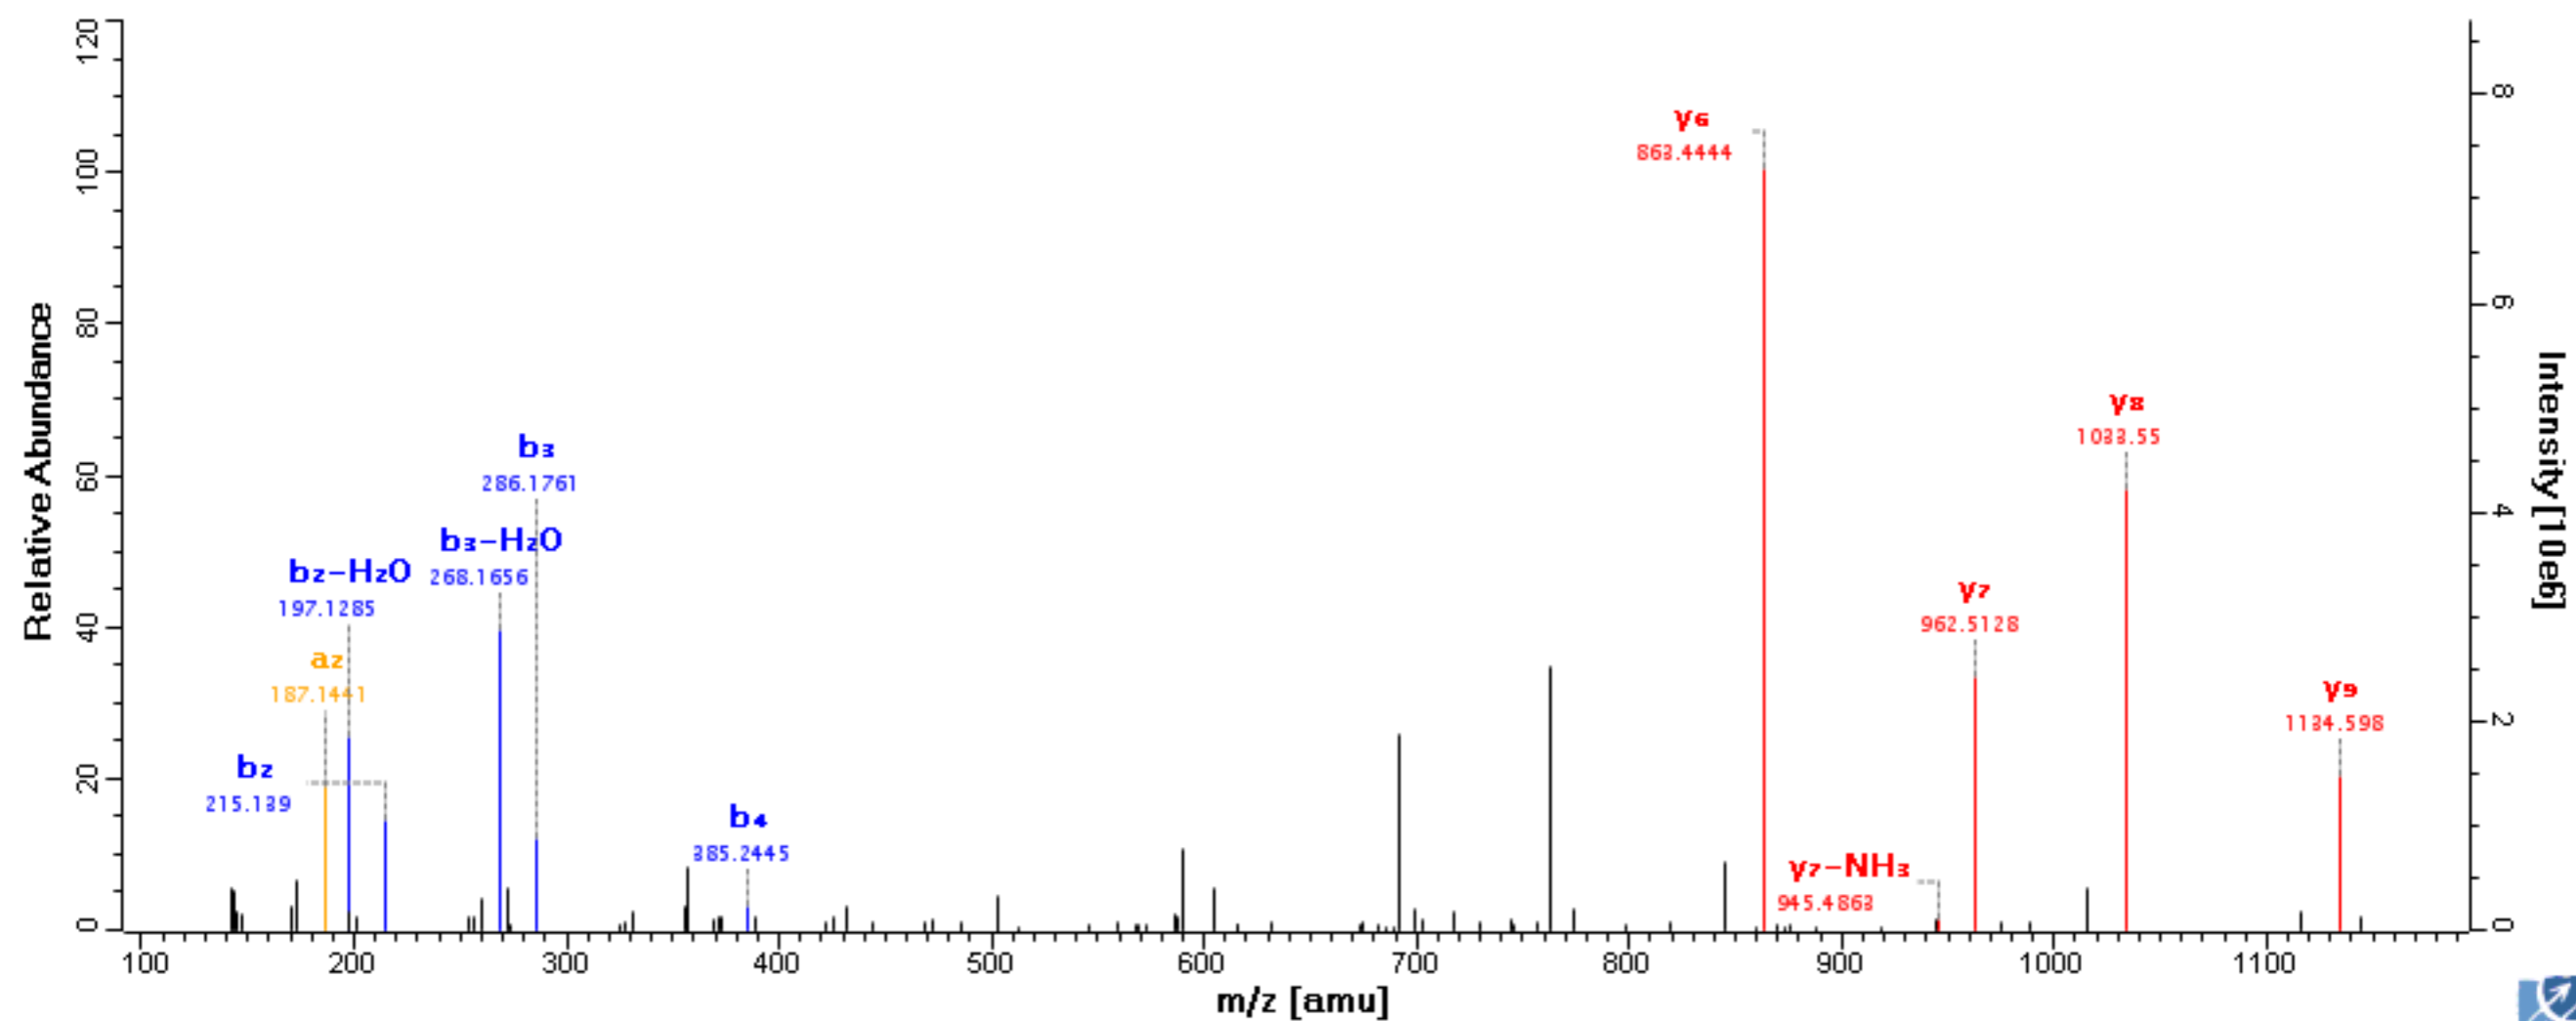

Source: Bibo\_20130531\_RM\_MSC07628\_4

Scannumber: 35743

Protein: PRSS1; TRP1; TRY1; TRYP1; PRSS3; PRSS2; TRY2; TRYP2; PRSS1; hCG\_1770551; tcag7.1285; TRY8; trypsinogen 8; PRSS1; TRP1; TRY1; TRYP1; T6; TRY6; PRSS1; E7EQ64; Q7Z5F3; P07477;

Peptide Score: 71.6

Method: FTMS; HCD; 1

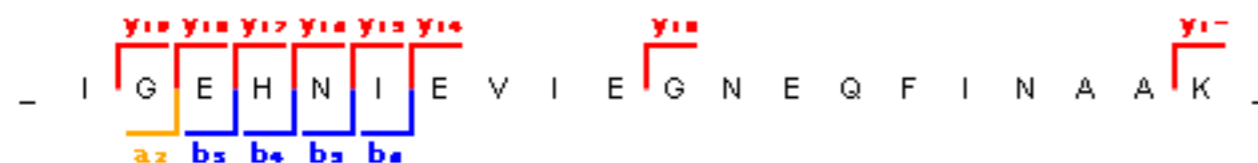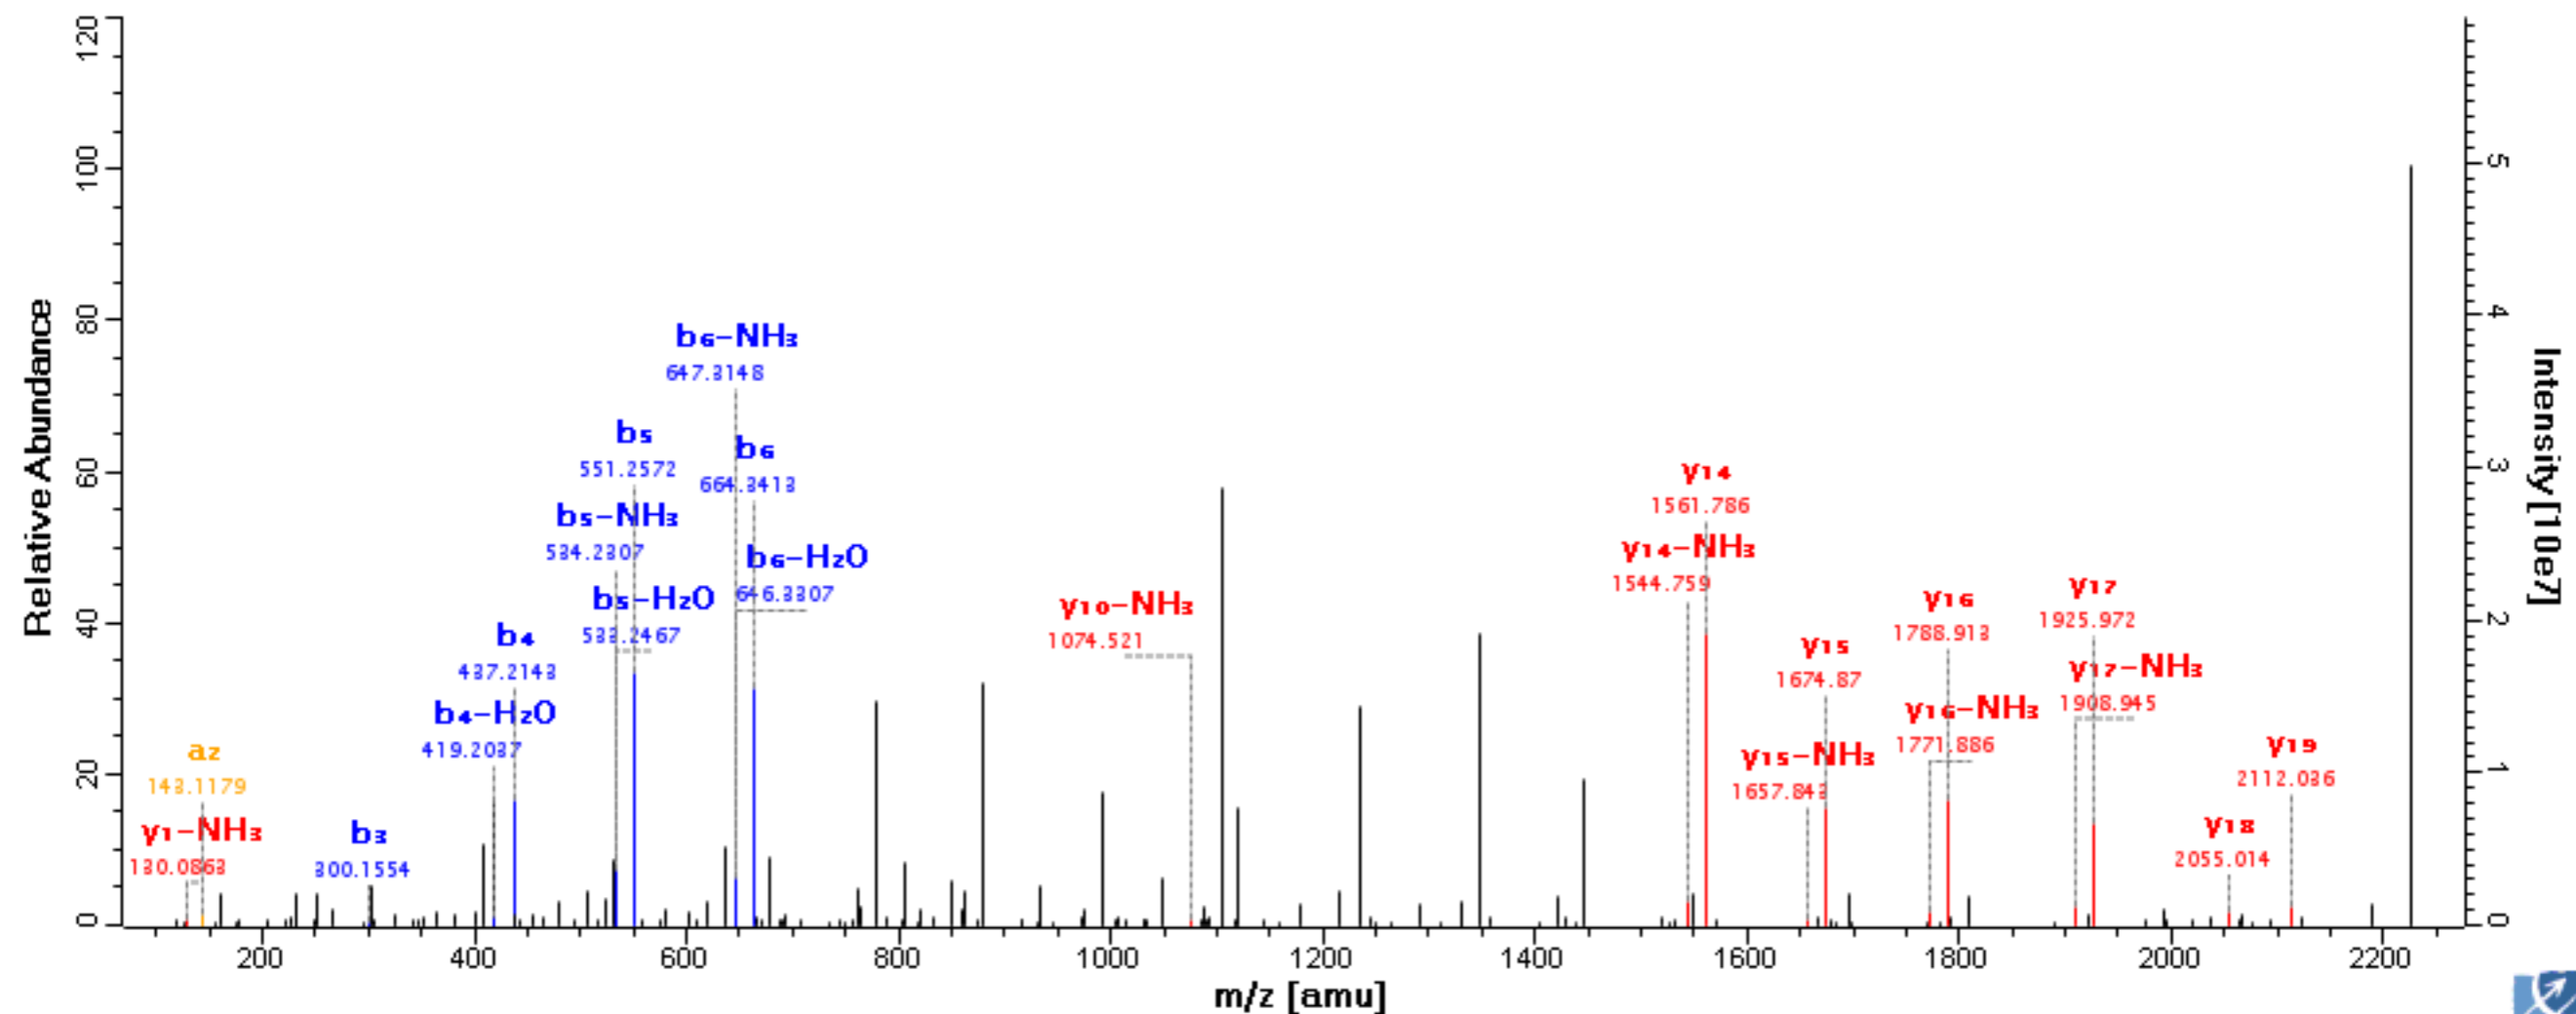

Source: Bibo\_20130531\_RM\_MSC07629\_1\_3  
 Scannumber: 12603  
 Protein: CENPU; ICEN24; KLIP1; MLF1IP; PBIP1; MLF1IP; MLF1IP; CENPU; ICEN24; KLIP1; MLF1IP; PBIP1; Q71F23-1; Q71F23; A8K8D2; Q09GN1; Q09GN2; A5D8X7; D6R9S4; Q71F23-2; Q71F23  
 Peptide Score: 62.41  
 Method: FTMS; HCD; 1

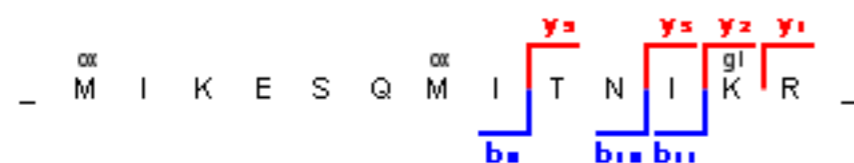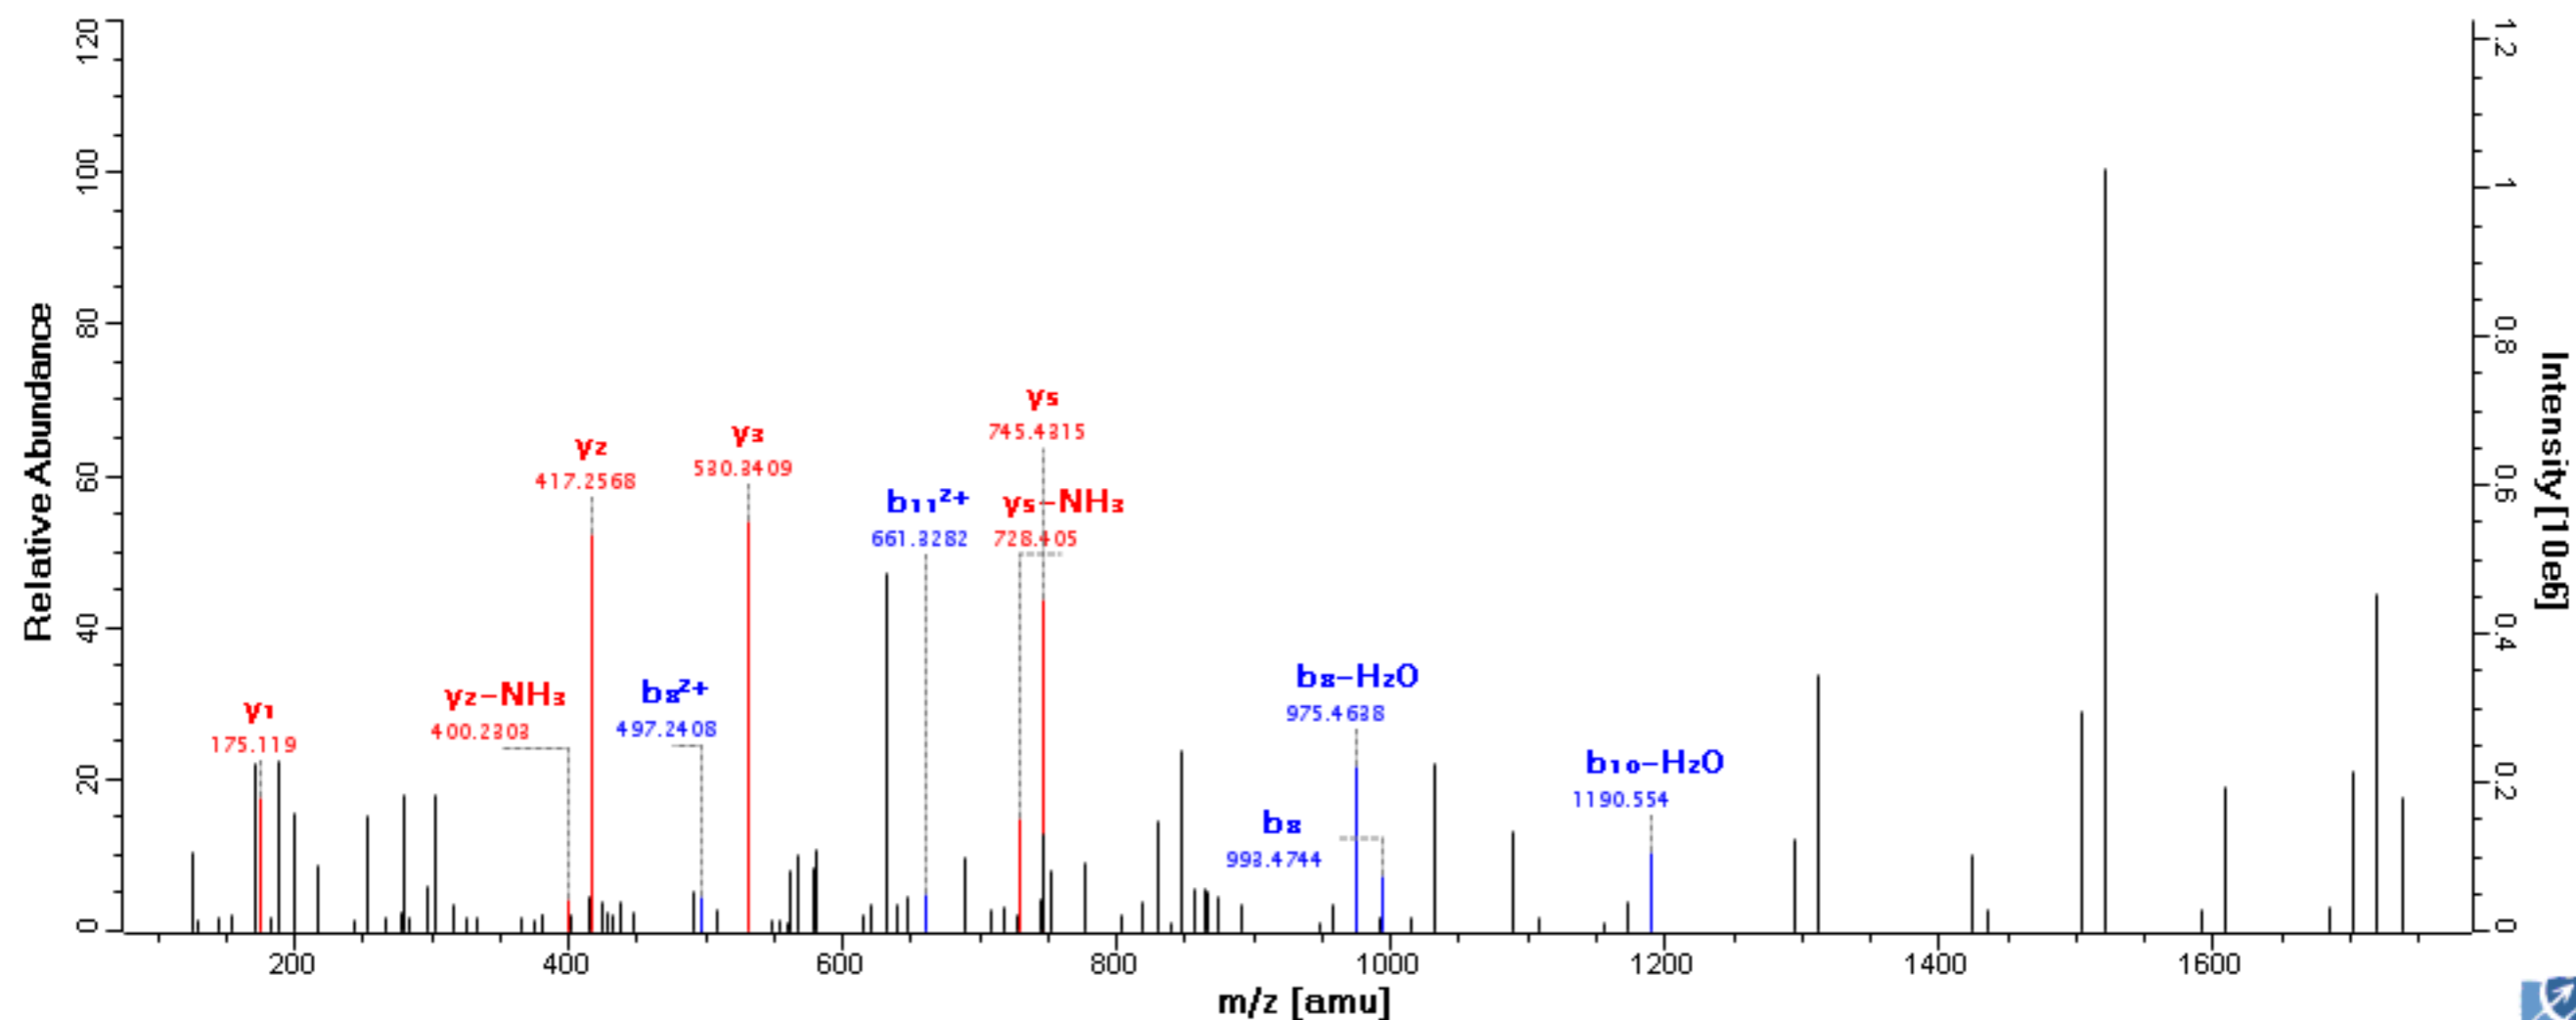

Source: Bibo\_20130531\_RM\_MSC07629\_1\_3  
 Scannumber: 14675  
 Protein: E5RG04  
 Peptide Score: 90.65  
 Method: FTMS; HCD; 1

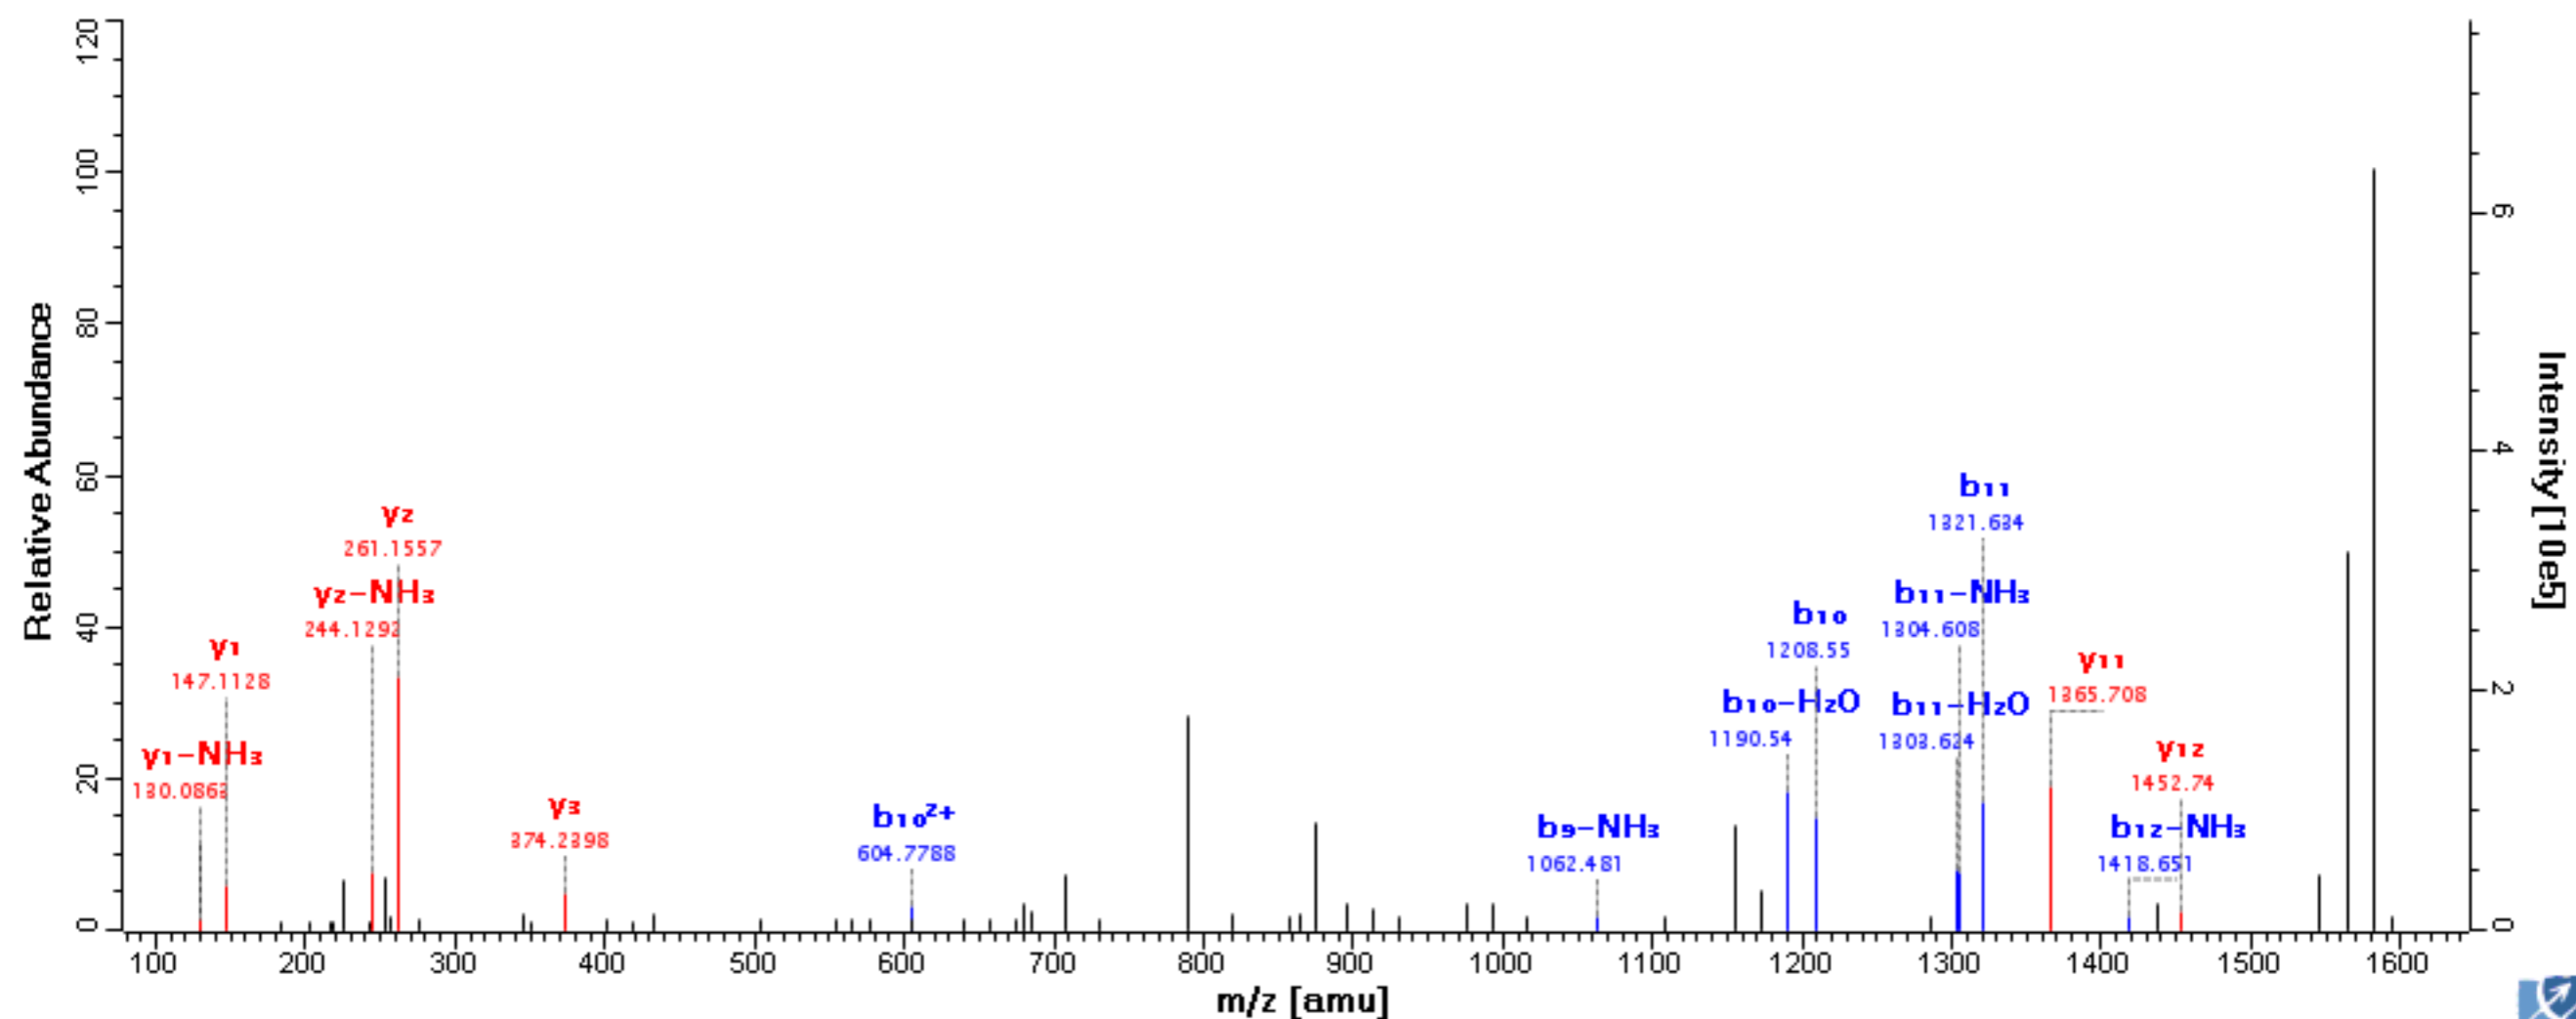

Source: Bibo\_20130531\_RM\_MSC07629\_1\_3  
 Scannumber: 15231  
 Protein: E5RG04  
 Peptide Score: 103.91  
 Method: FTMS; HCD; 1

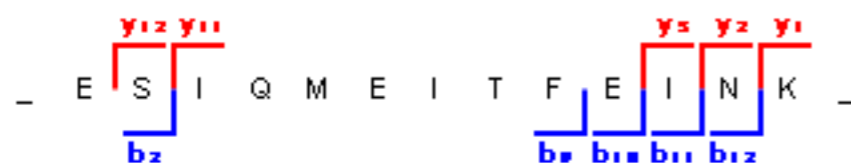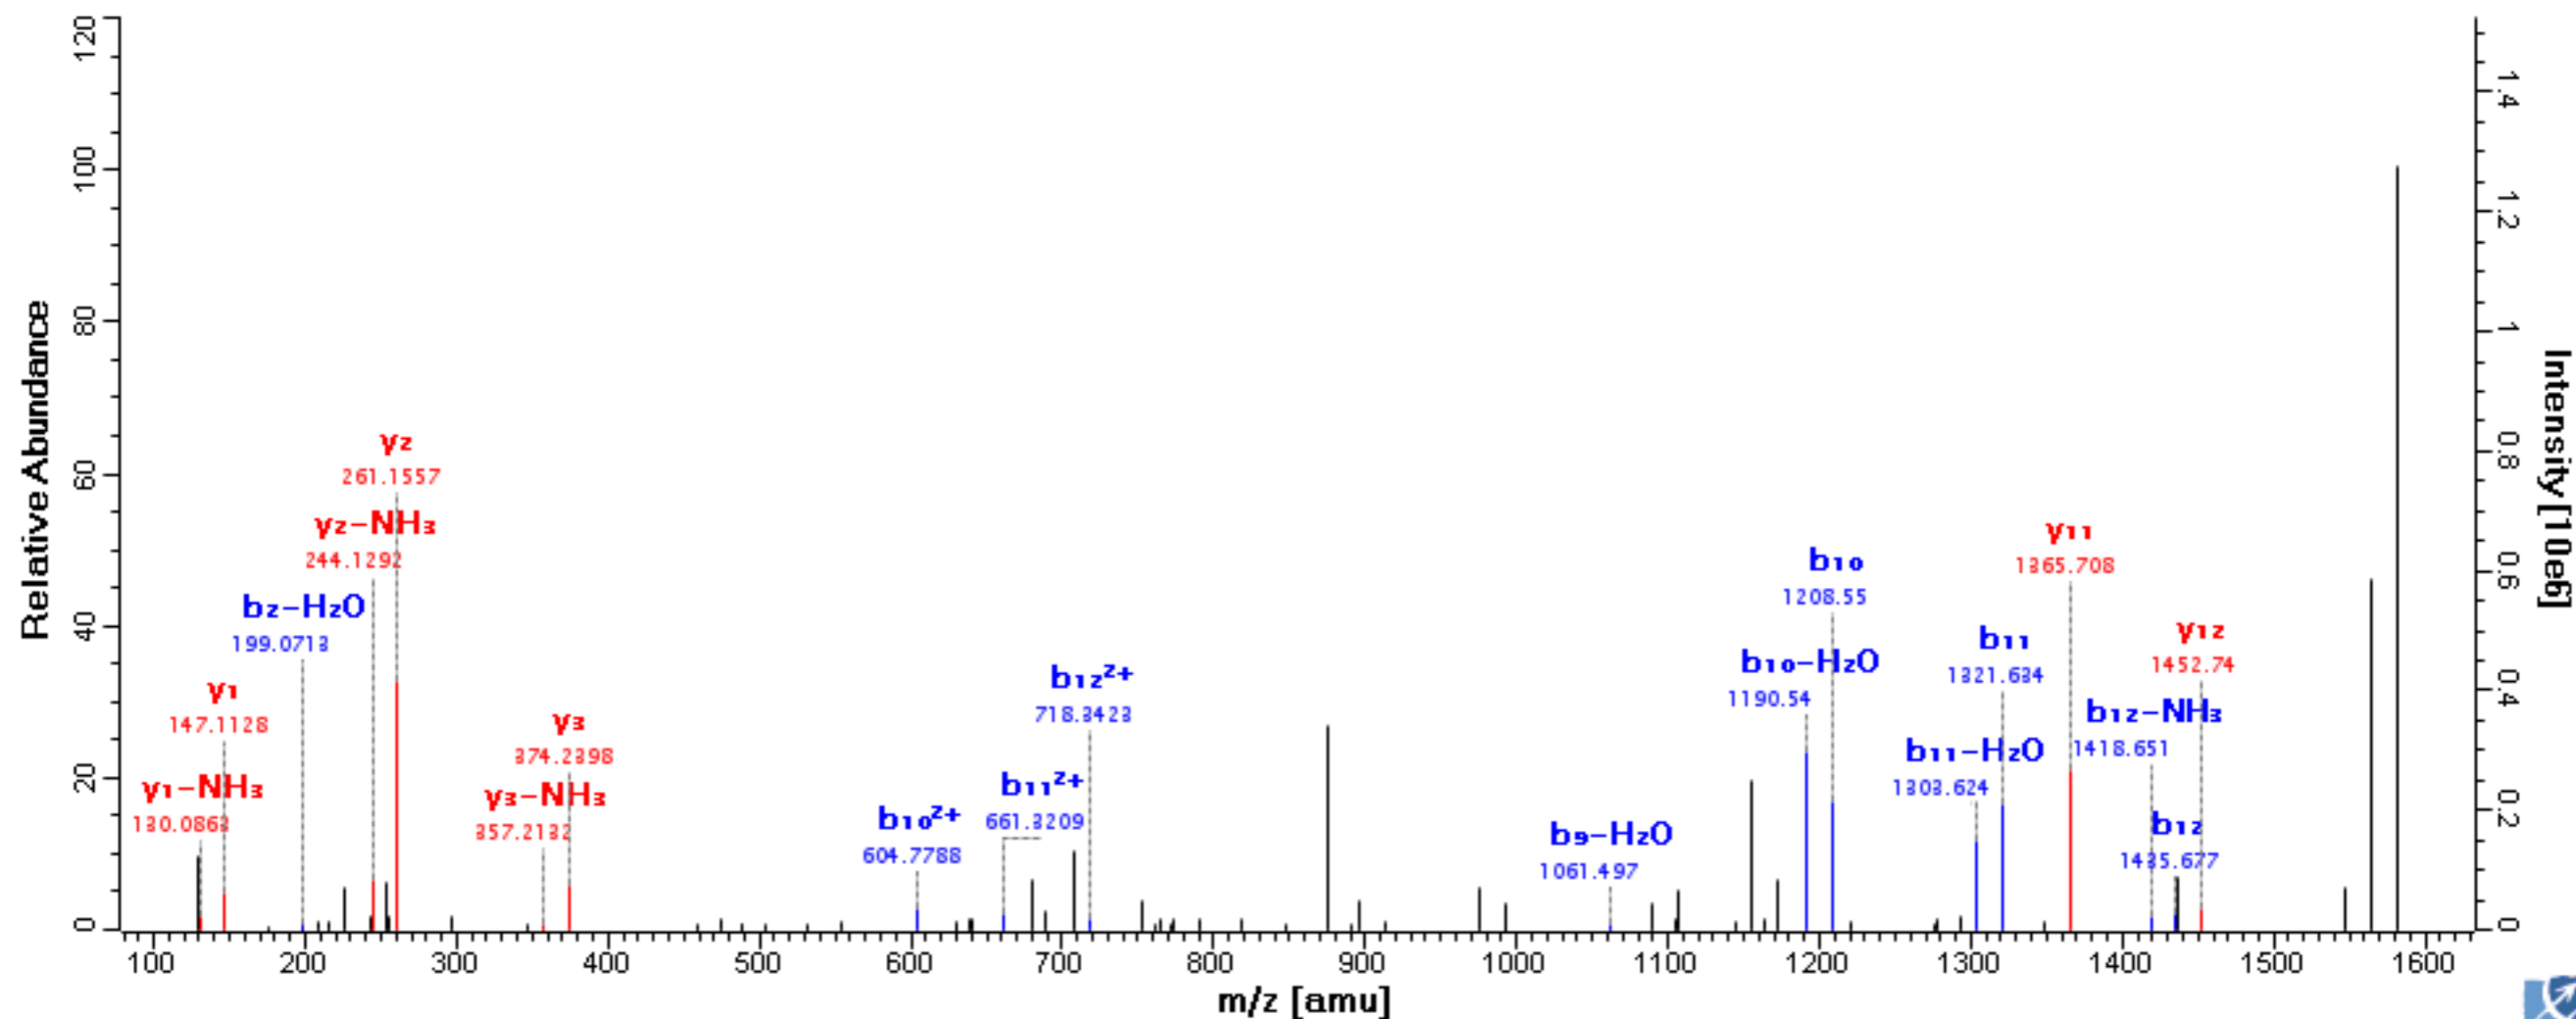

Source: Bibo\_20130531\_RM\_MSC07629\_1\_3  
 Scannumber: 15462  
 Protein: E5RG04  
 Peptide Score: 87  
 Method: FTMS; HCD; 1

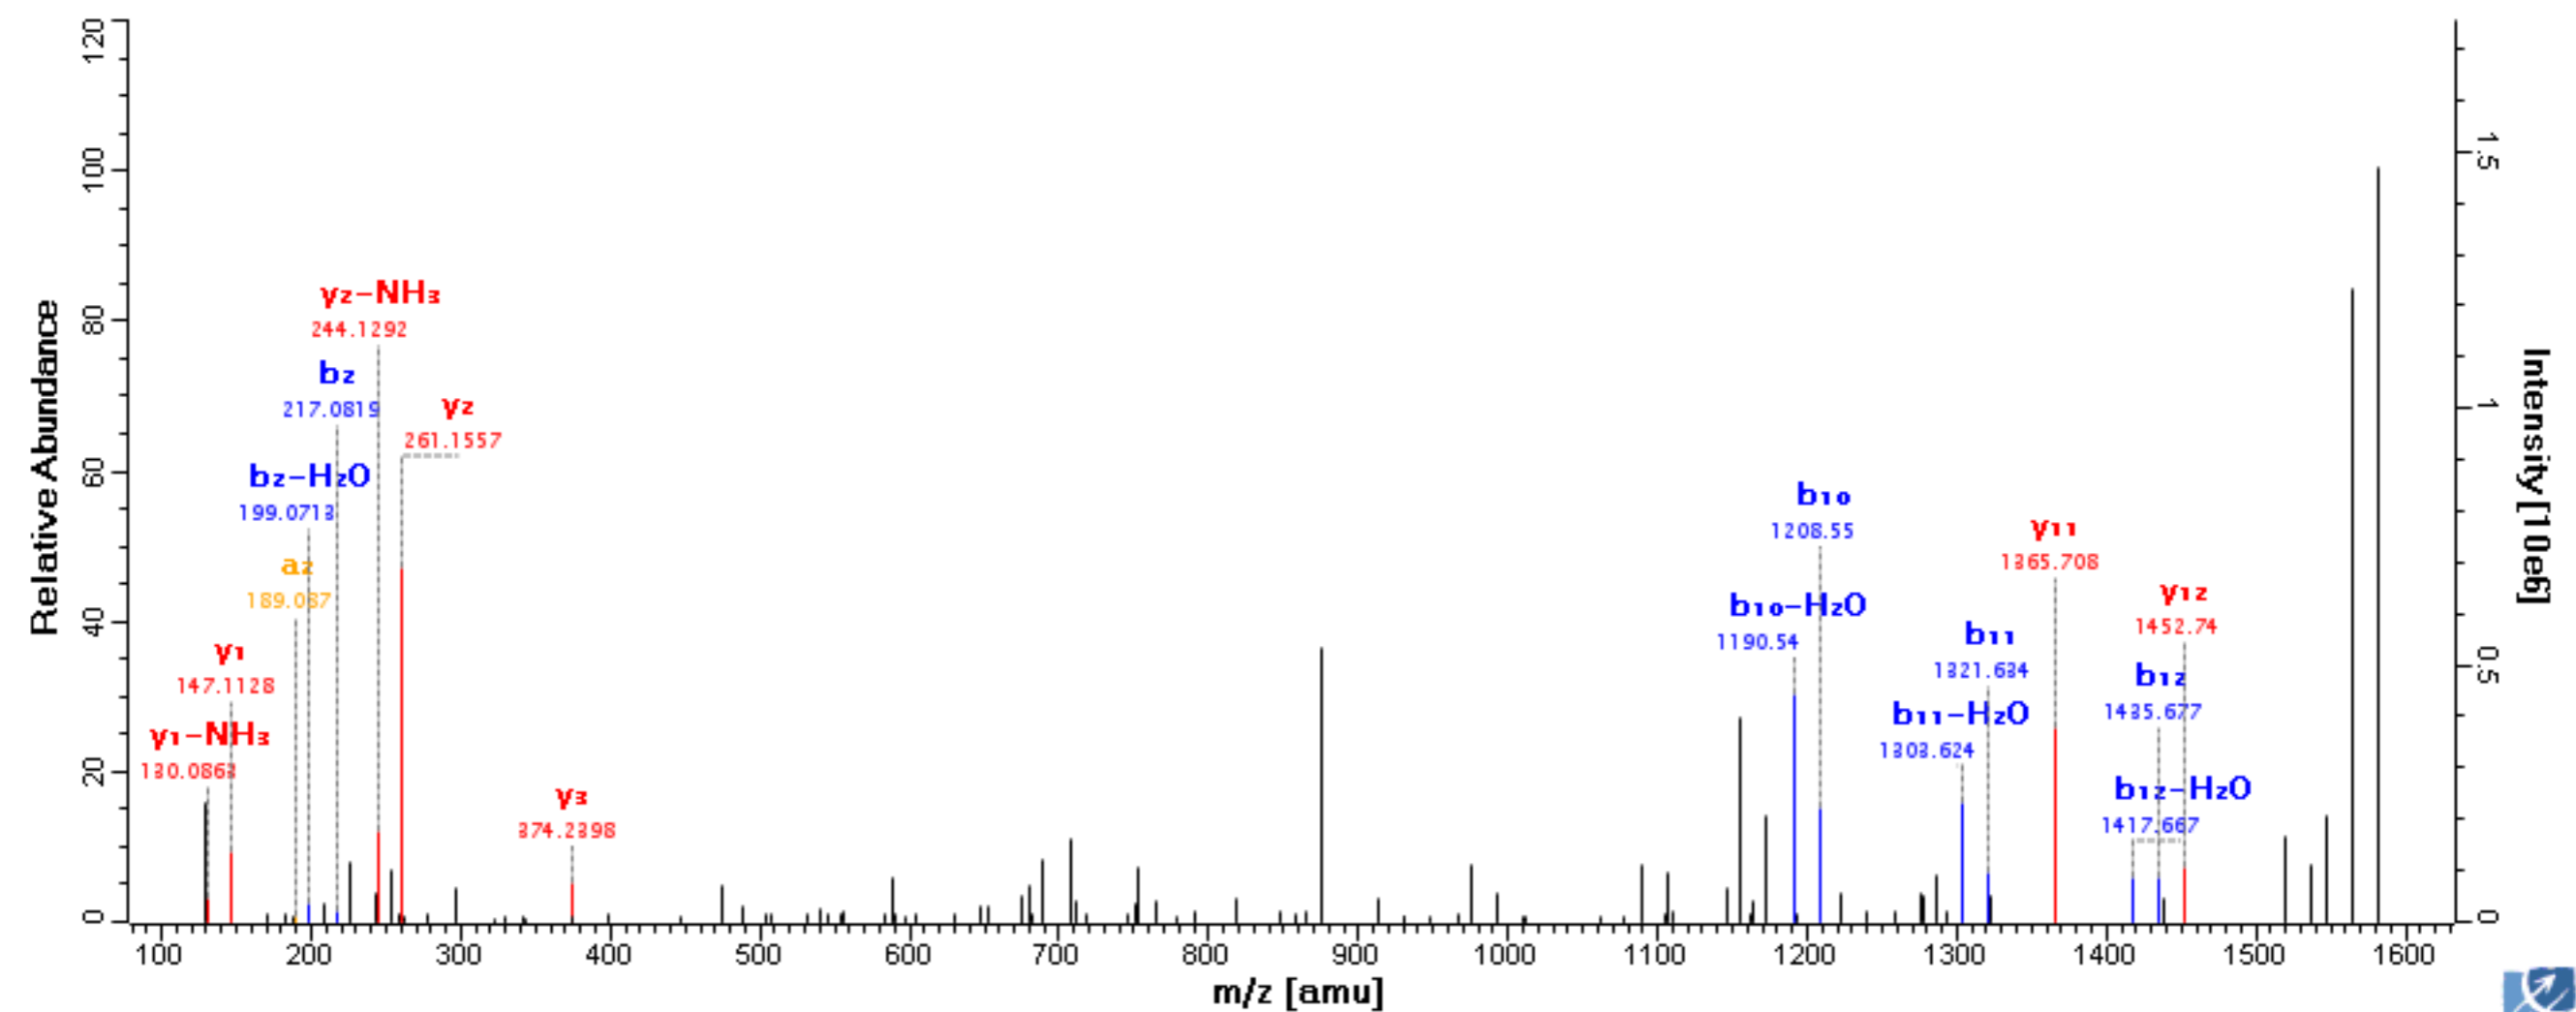

Source: Bibo\_20130531\_RM\_MSC07629\_1\_3  
Scannumber: 19818  
Protein: RP11-263K1.9.1-002; TRIM46; B1AVQ4; B7Z4F9  
Peptide Score: 4.8  
Method: FTMS; HCD; 1

ac α gl  
\_ M K N M E K E I I C P V C Q E M Y K \_

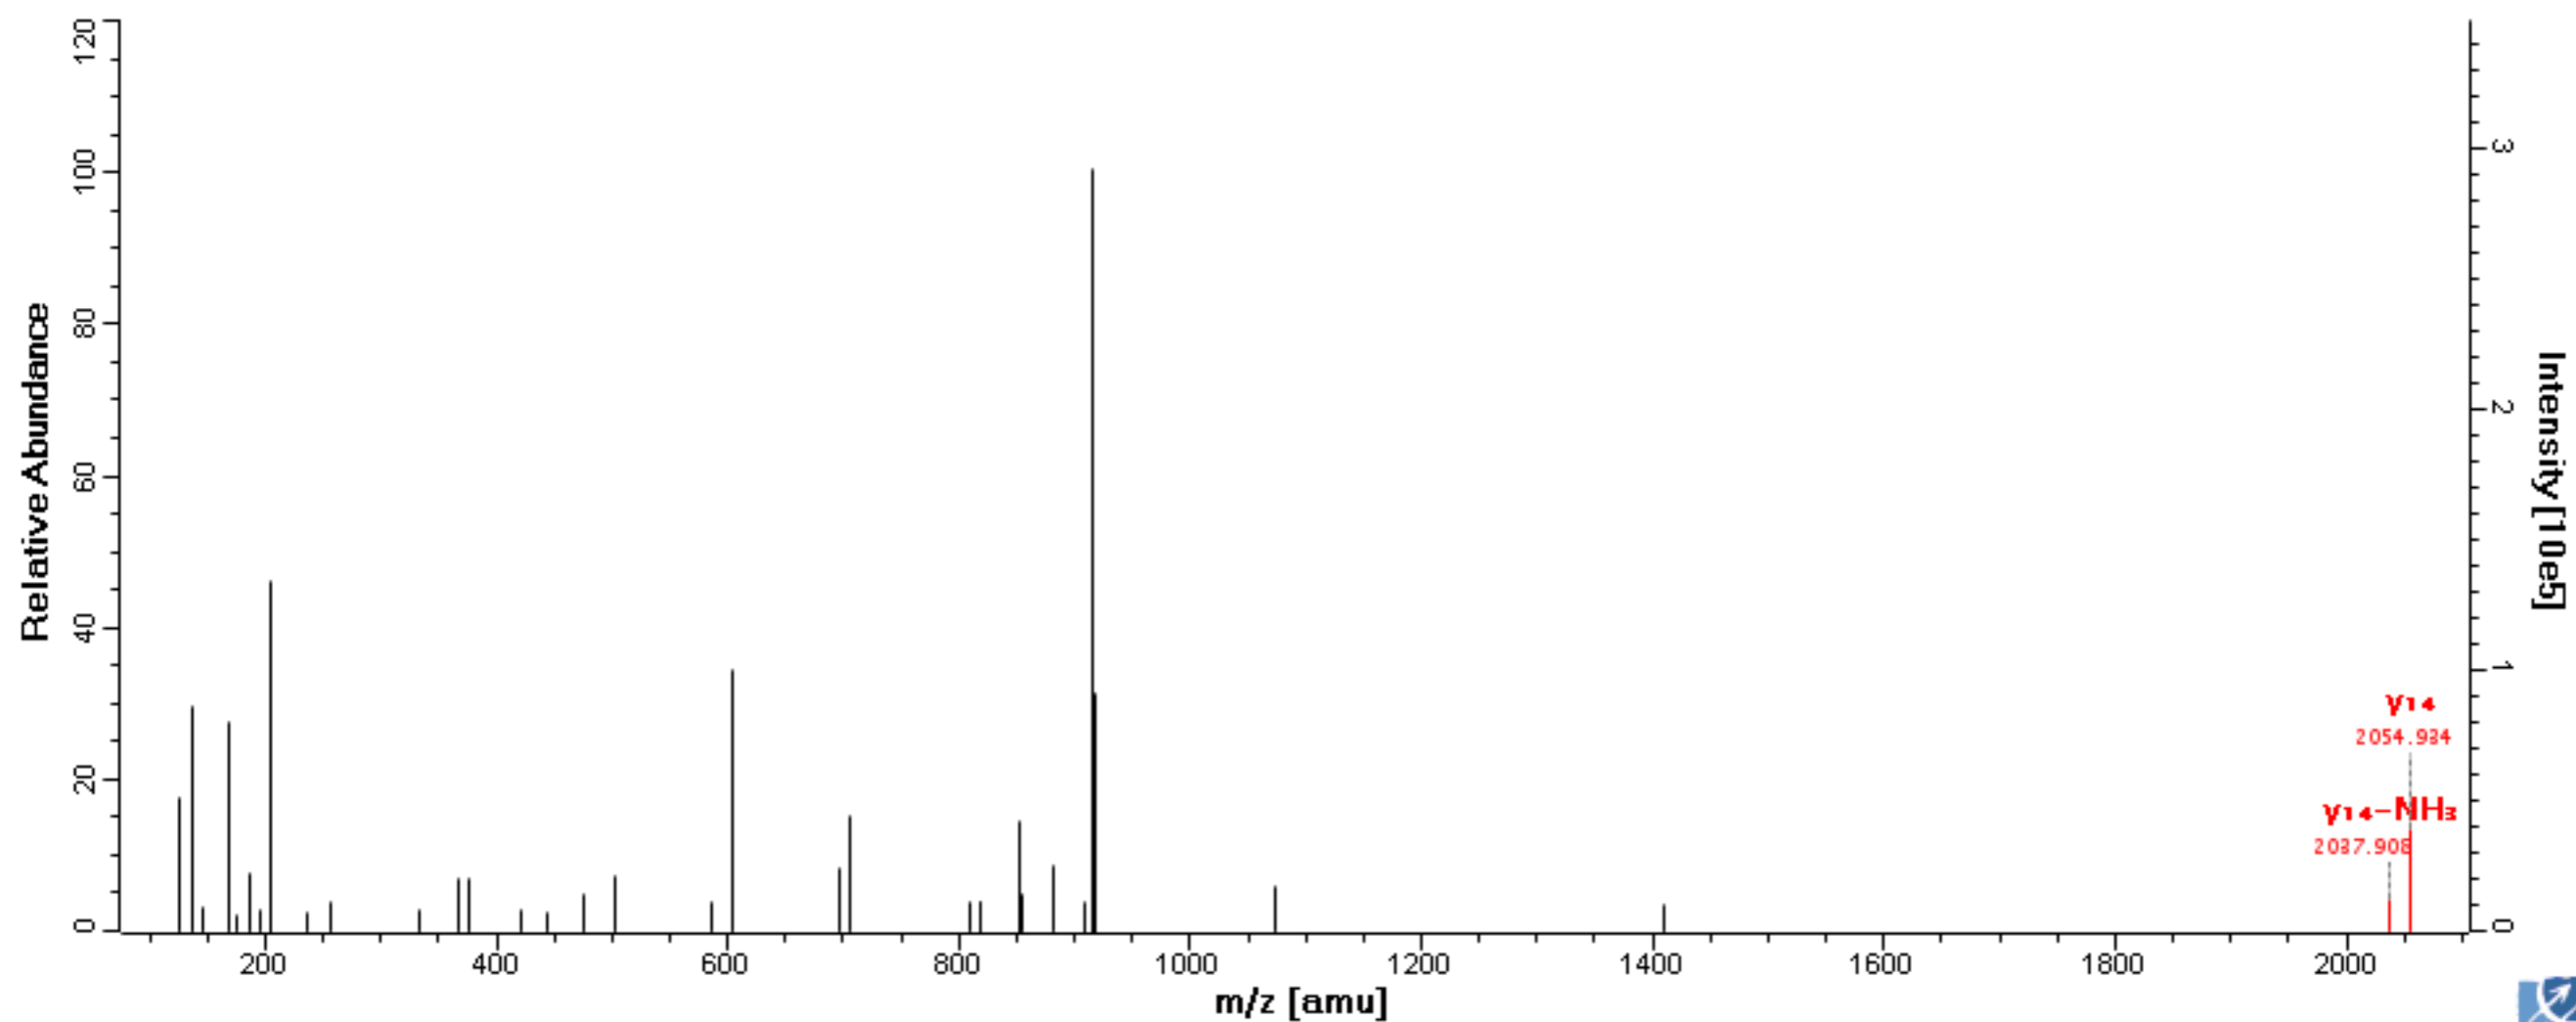

Source: Bibo\_20130531\_RM\_MSC07629\_1\_3  
 Scannumber: 35295  
 Protein: PRSS1; TRP1; TRY1; TRYP1; PRSS3; PRSS2; TRY2; TRYP2; PRSS1; hCG\_1770551; tcag7.1285; TRY8; trypsinogen 8; PRSS1; TRP1; TRY1; TRYP1; T6; TRY6; PRSS1; E7EQ64; Q7Z5F3; P07477;  
 Peptide Score: 68.13  
 Method: FTMS; HCD; 1

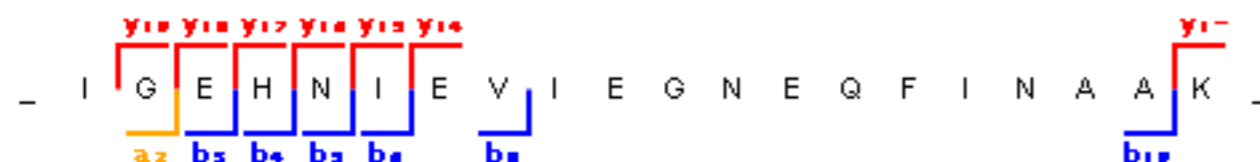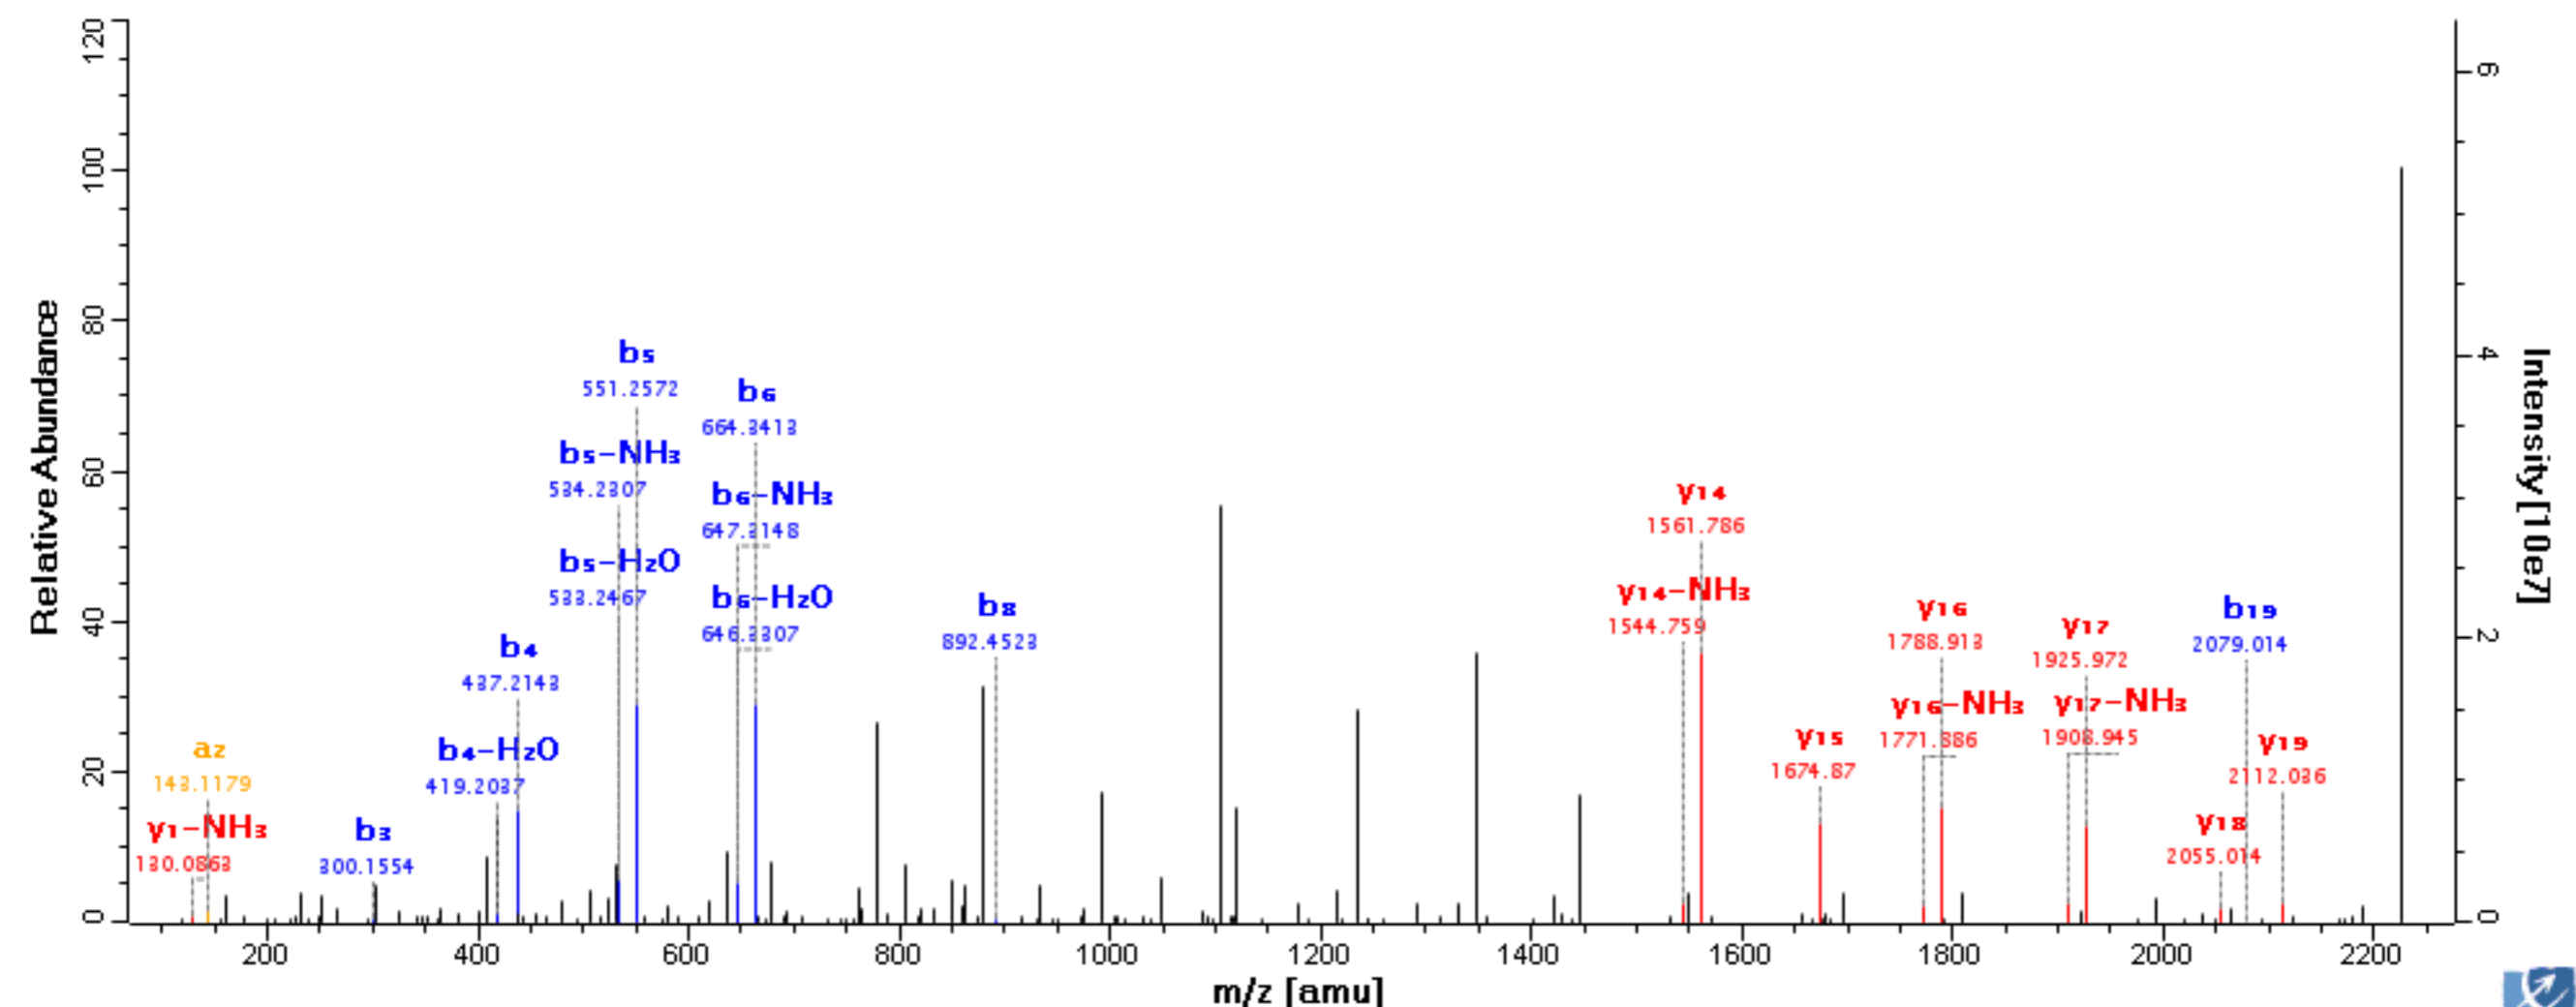

Source: Bibo\_20130531\_RM\_MSC07629\_1\_3  
Scannumber: 43945  
Protein: IPI00984483  
Peptide Score: 0.19  
Method: FTMS; HCD; 1

ac E W N G M E W N G M E W N A M E W N A M E W N A M E W K R

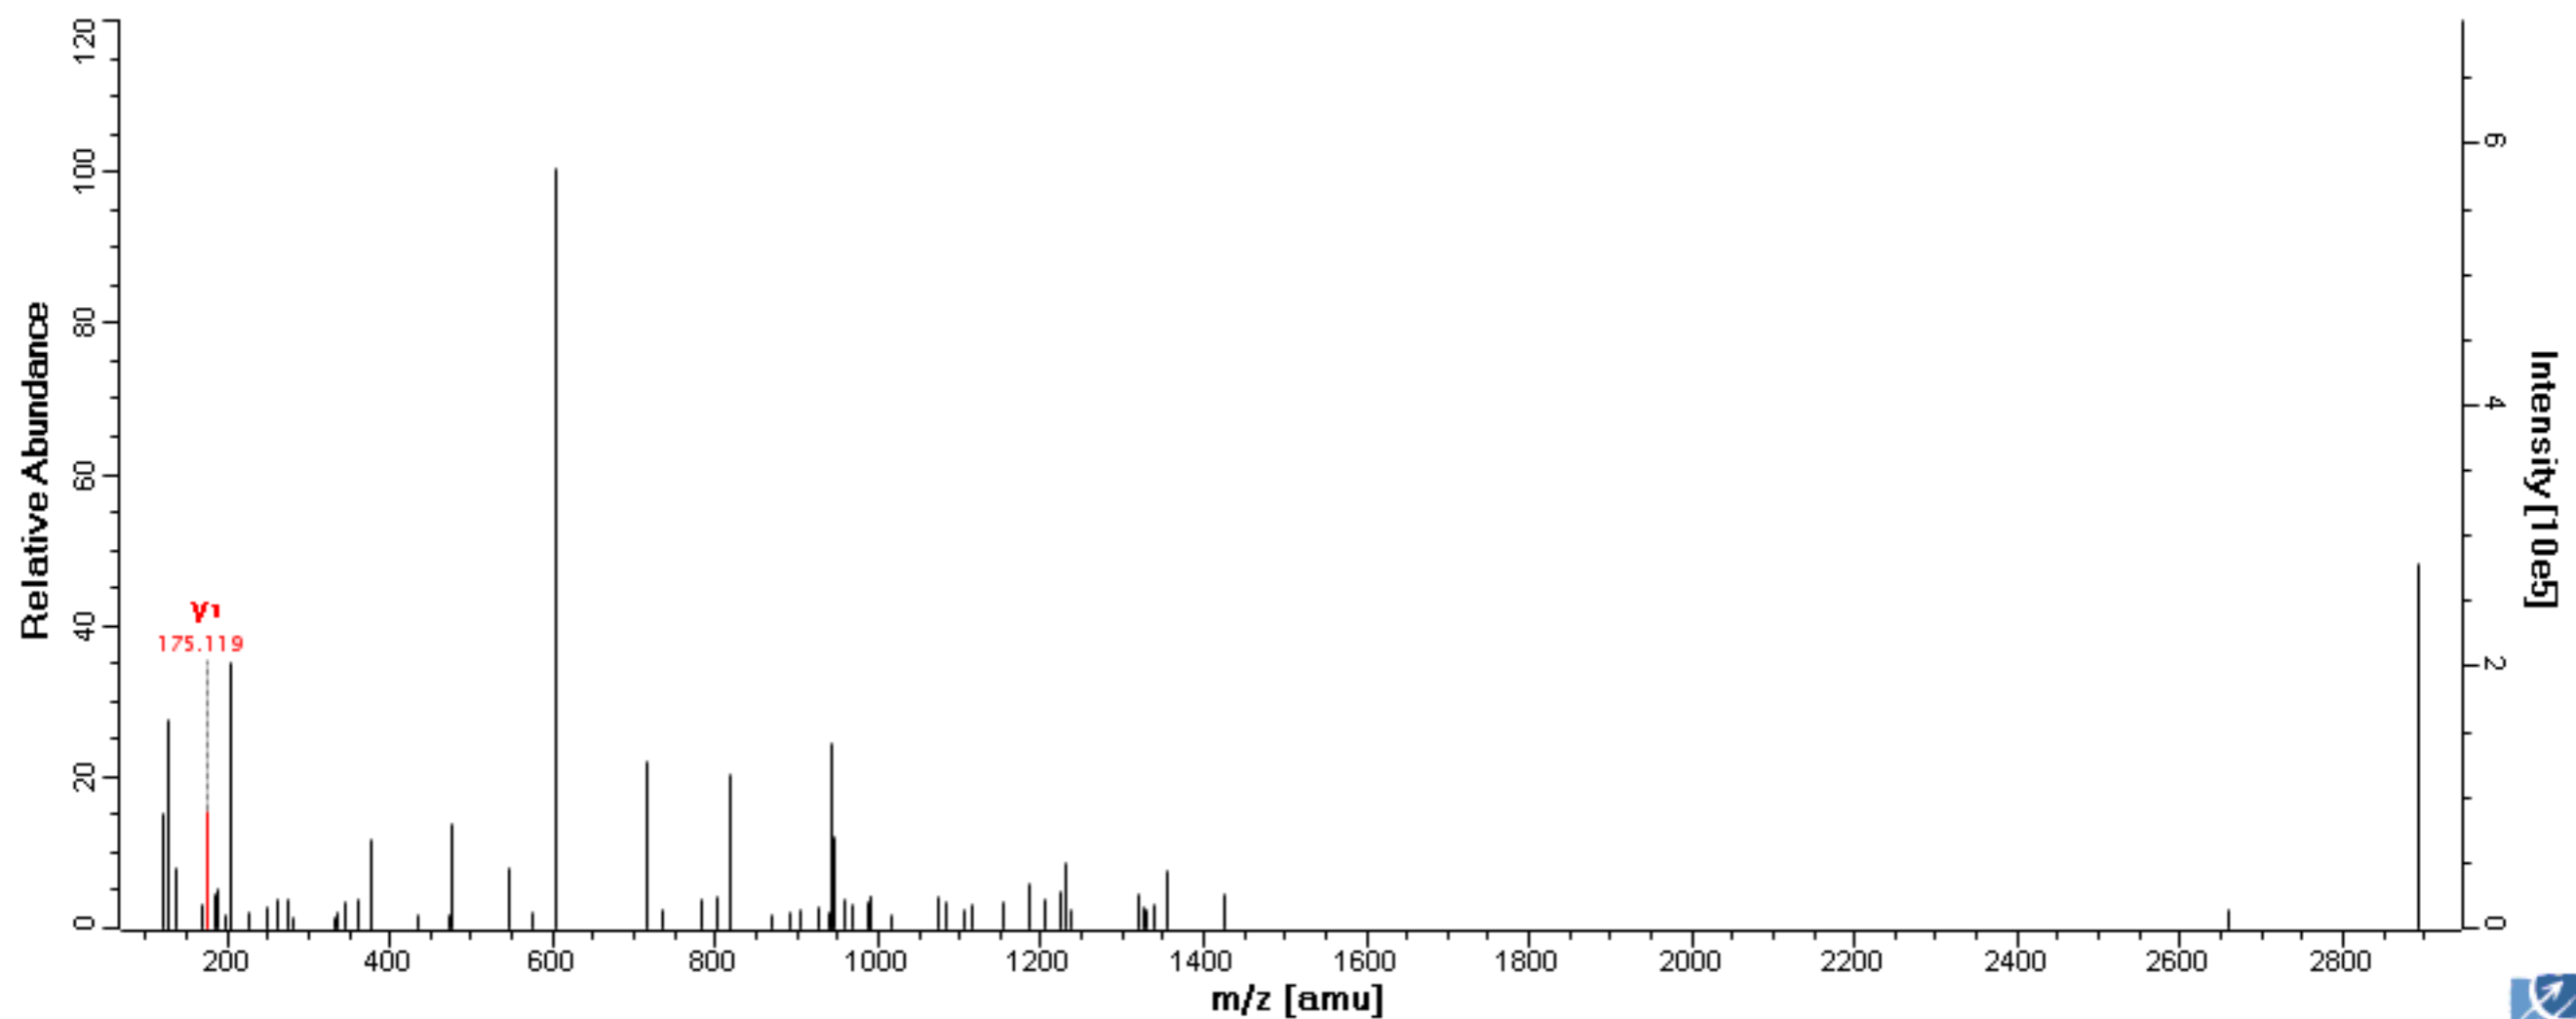

Source: Bibo\_20130531\_RM\_MSC07629\_1\_3  
 Scannumber: 54094  
 Protein: P02666  
 Peptide Score: 100.35  
 Method: FTMS; HCD; 1

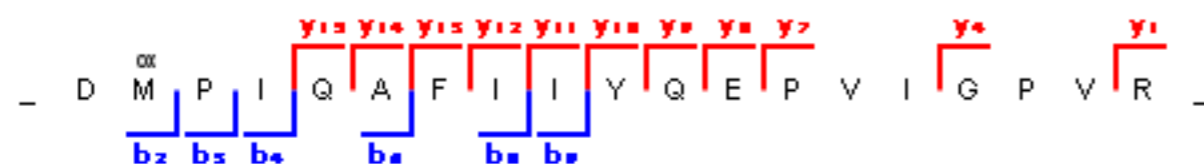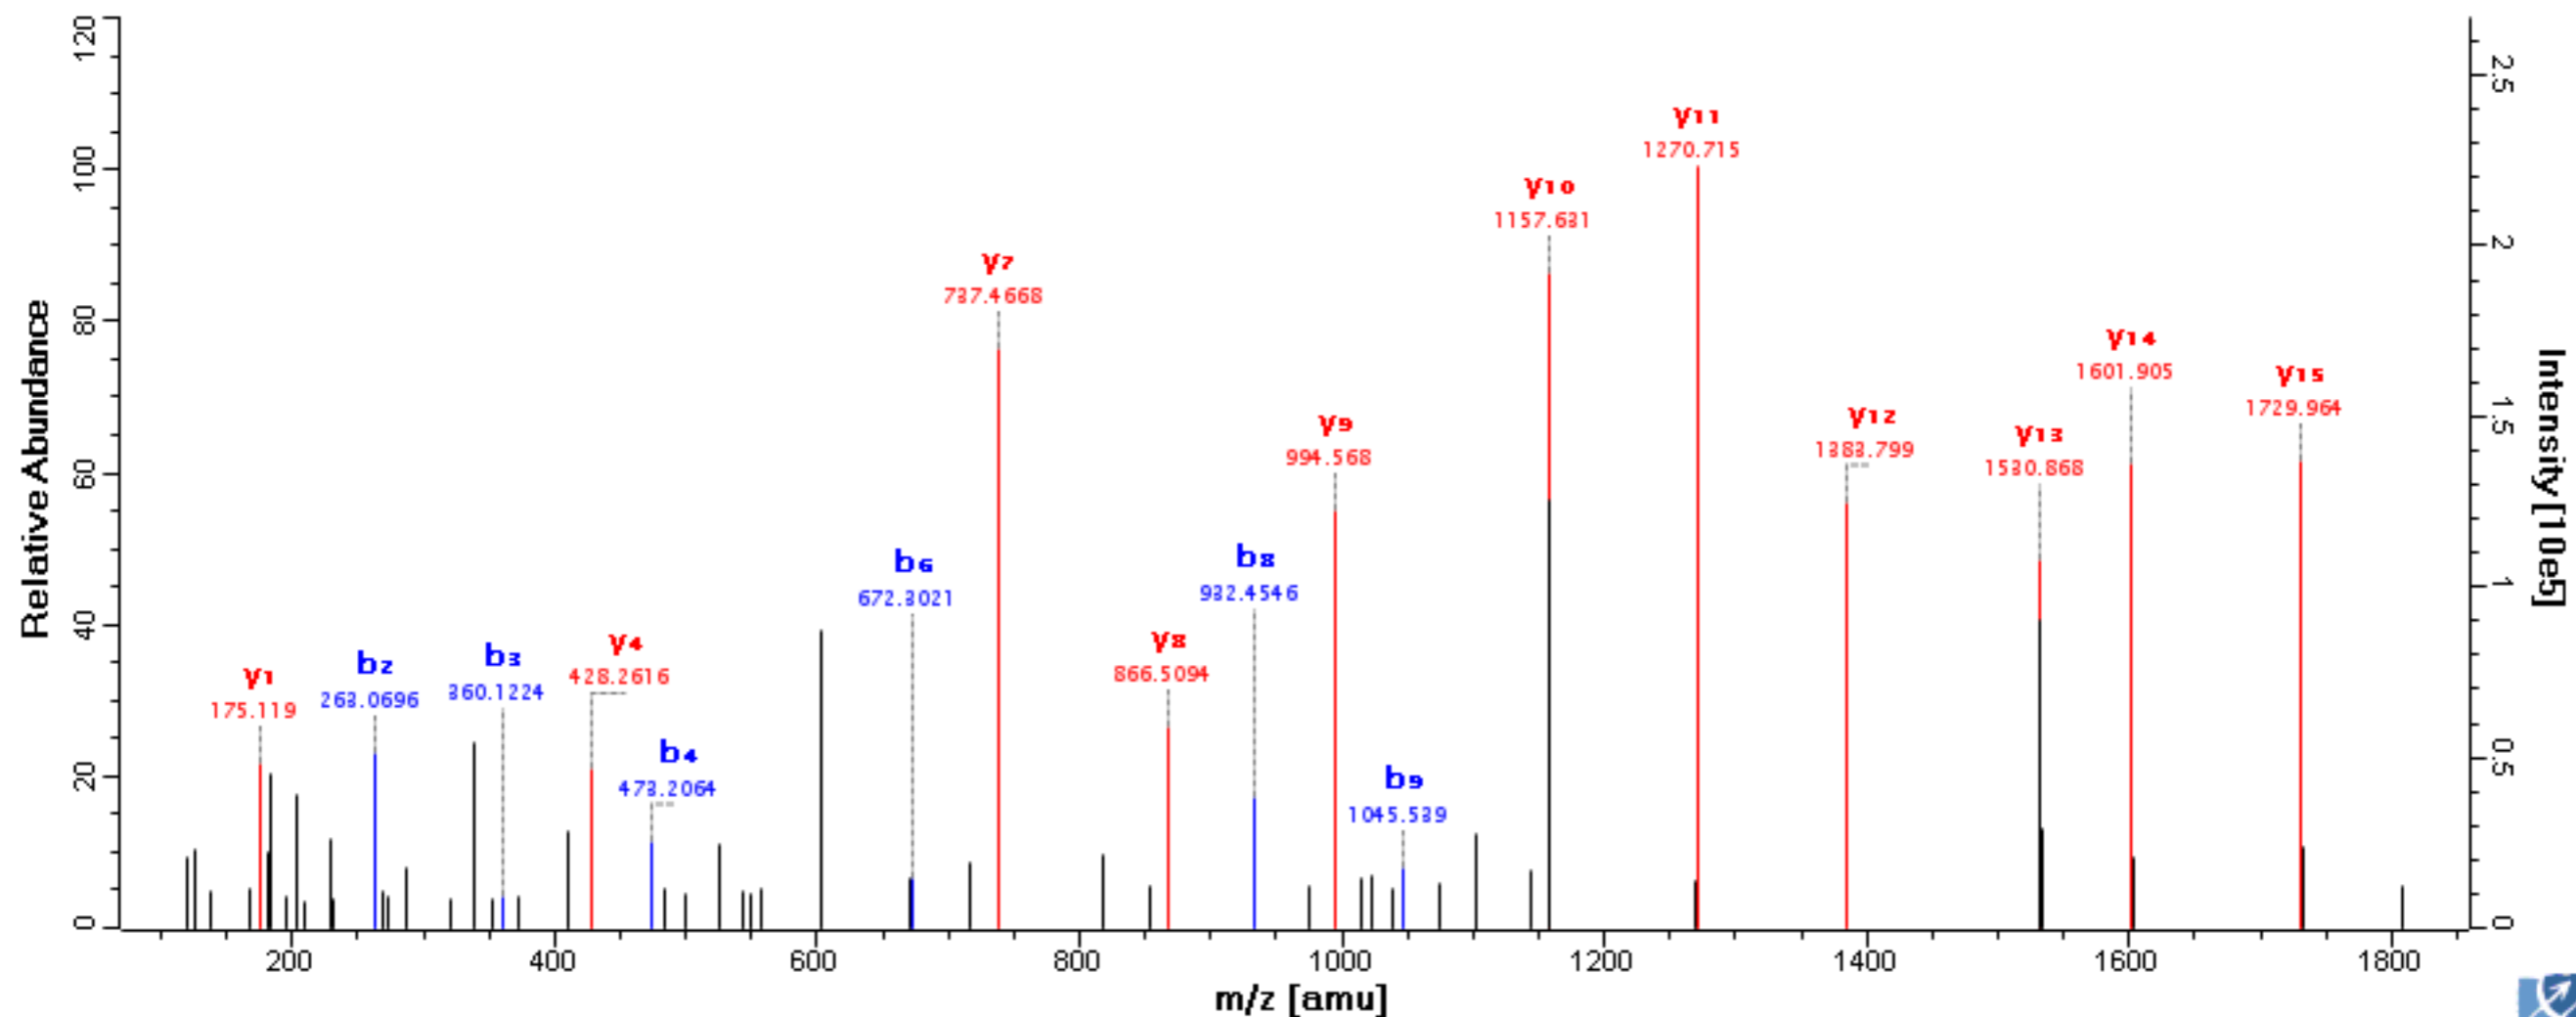

Source: Bibo\_20130531\_RM\_MSC07629\_4  
 Scannumber: 10717  
 Protein: ZNF300; Q96RE9-2; Q96RE9  
 Peptide Score: 8.94  
 Method: FTMS; HCD; 1

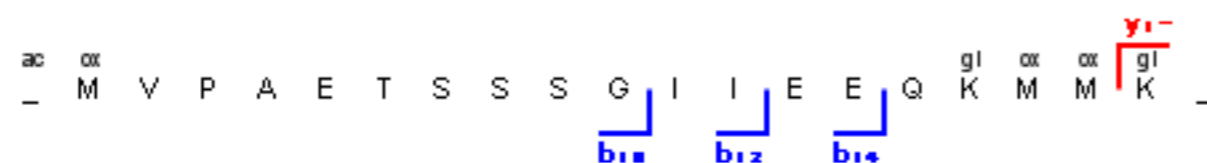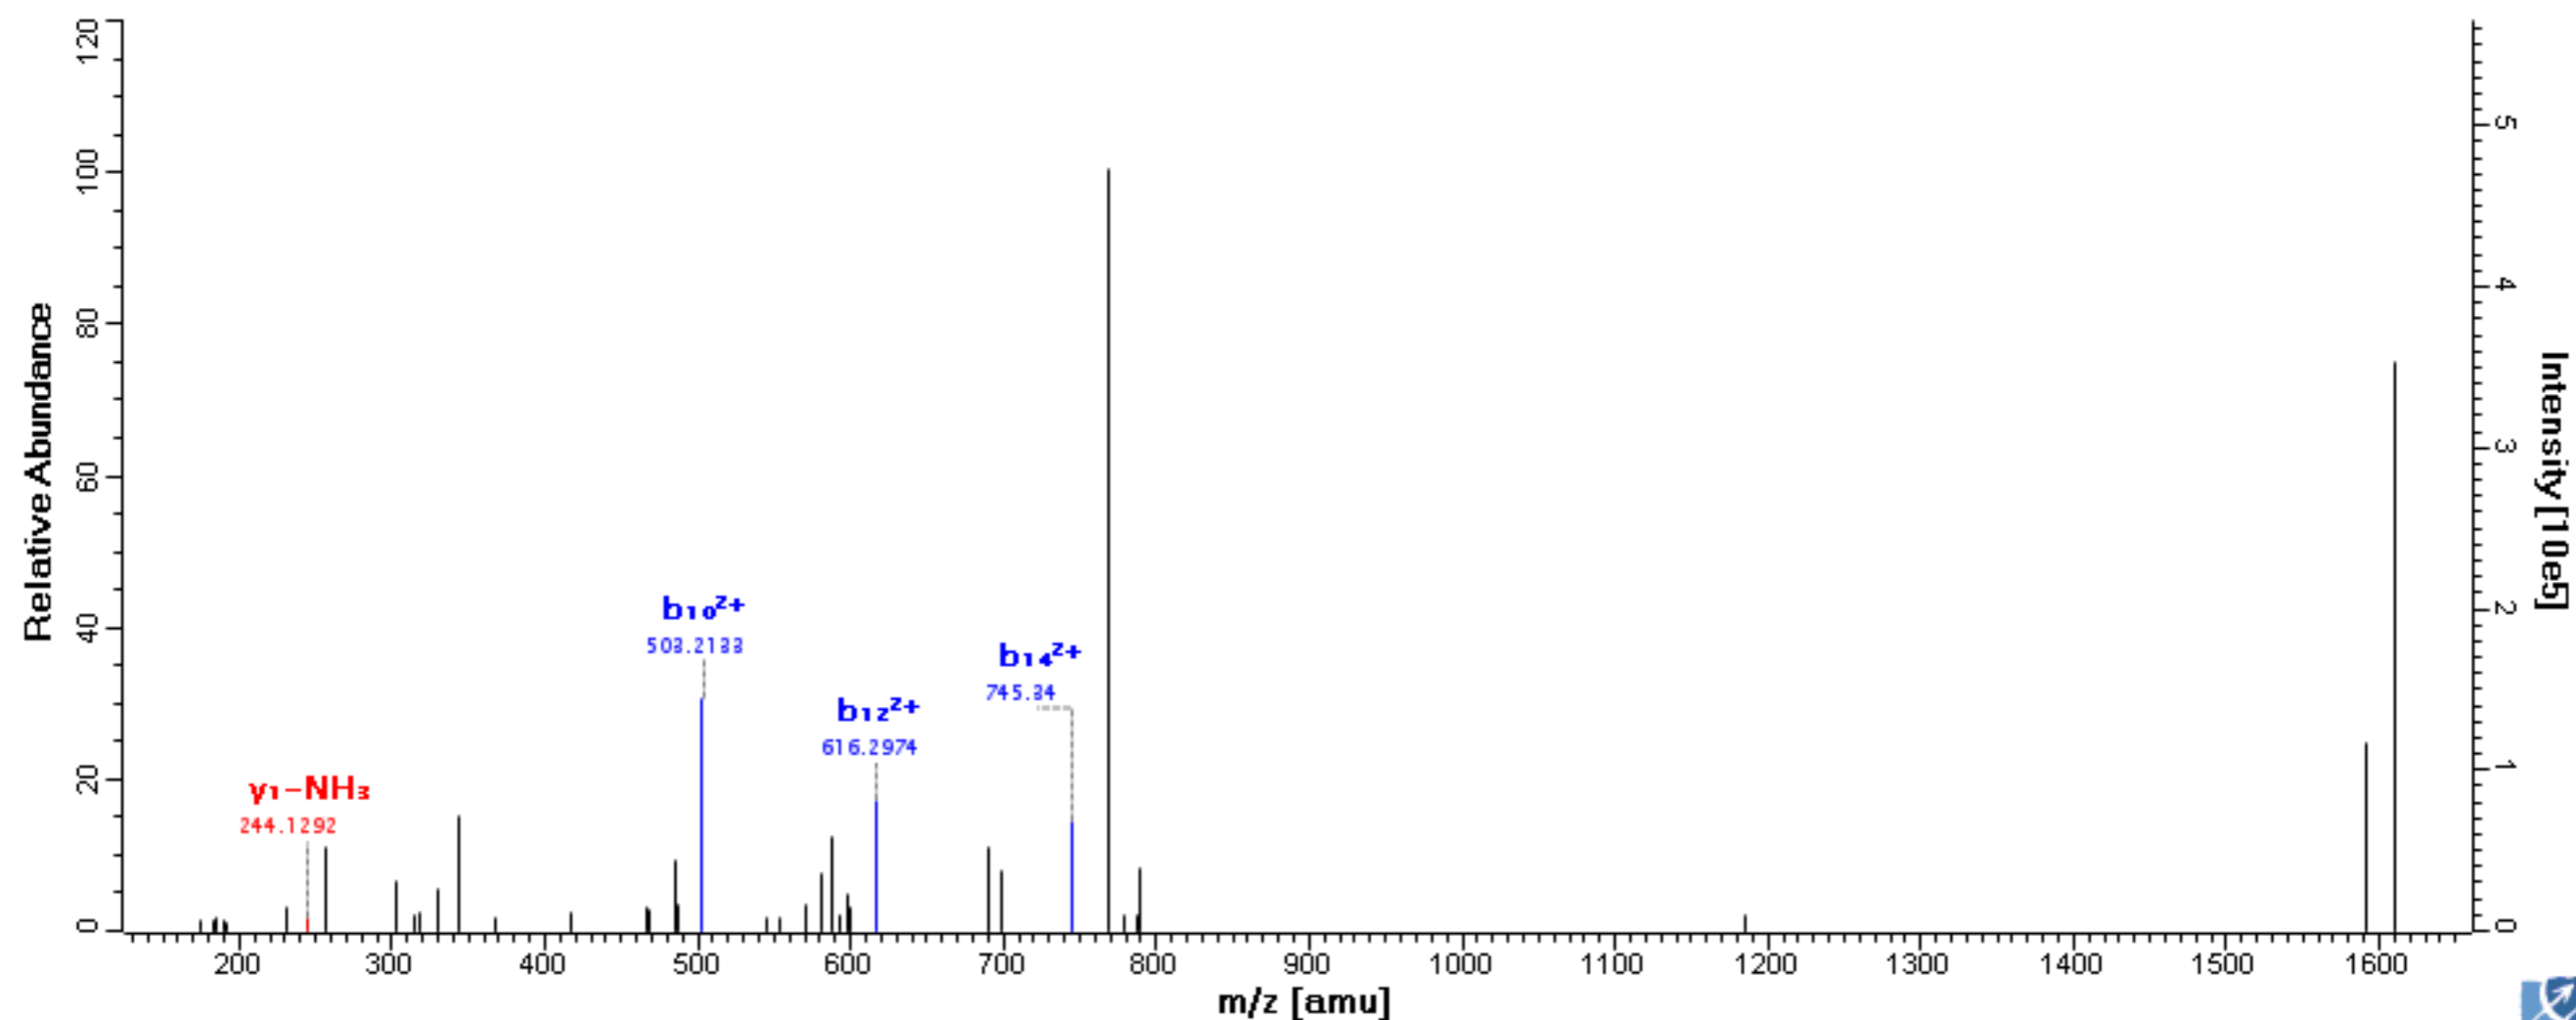

Source: Bibo\_20130531\_RM\_MSC07629\_4  
 Scannumber: 28823  
 Protein: CHX10; HOX10; VSX2; P58304  
 Peptide Score: 45.28  
 Method: FTMS; HCD; 1

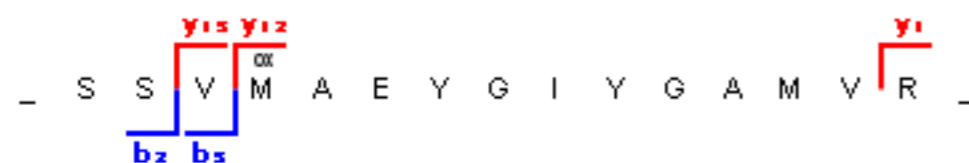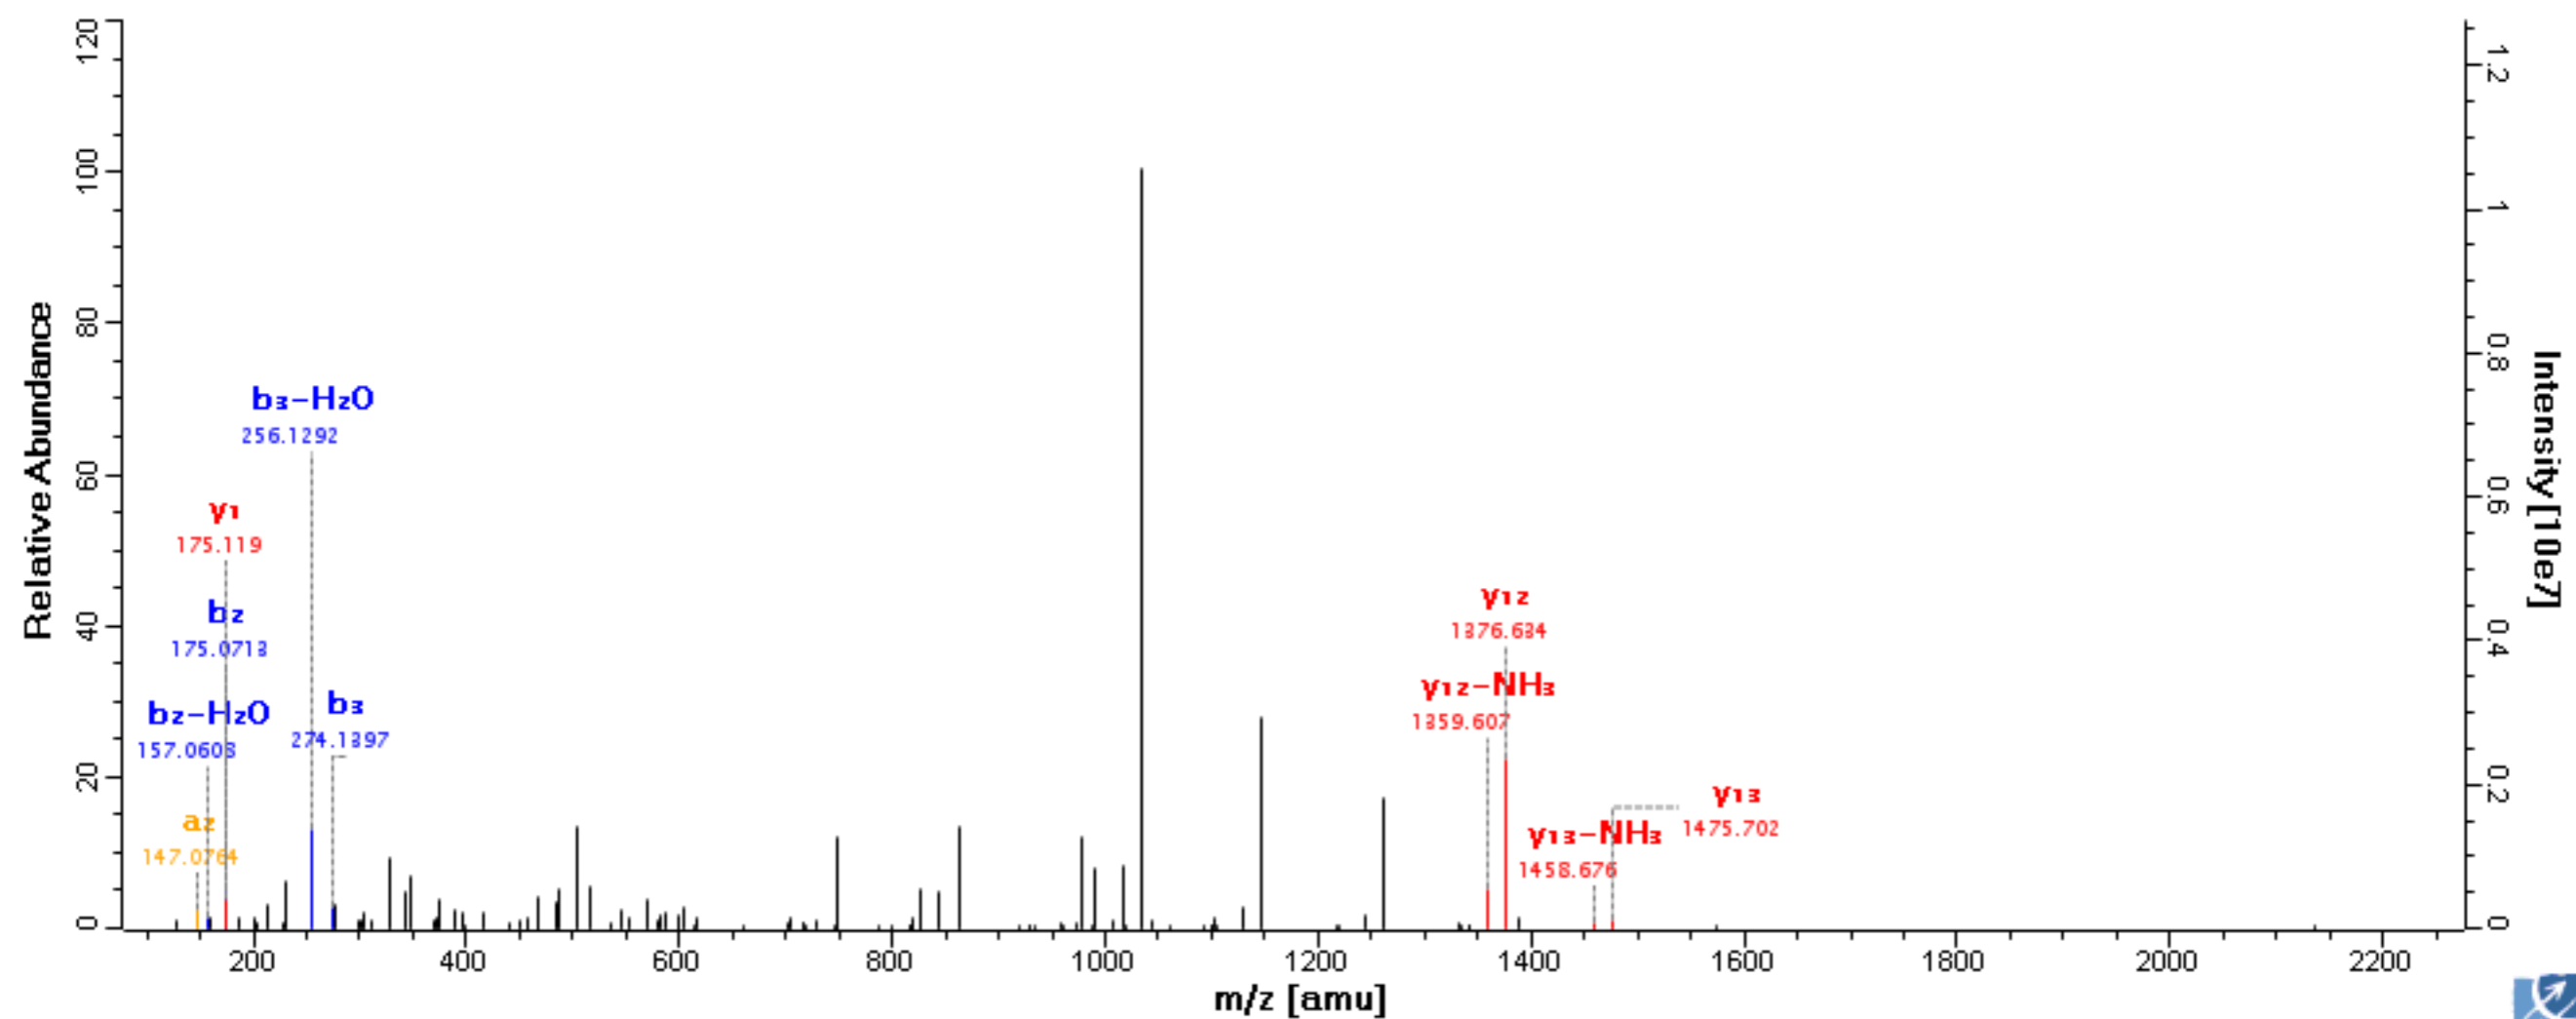

Source: Bibo\_20130531\_RM\_MSC07629\_4  
 Scannumber: 29019  
 Protein: CHX10; HOX10; VSX2; P58304  
 Peptide Score: 43.76  
 Method: FTMS; HCD; 1

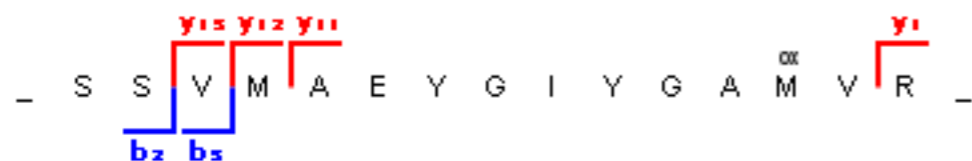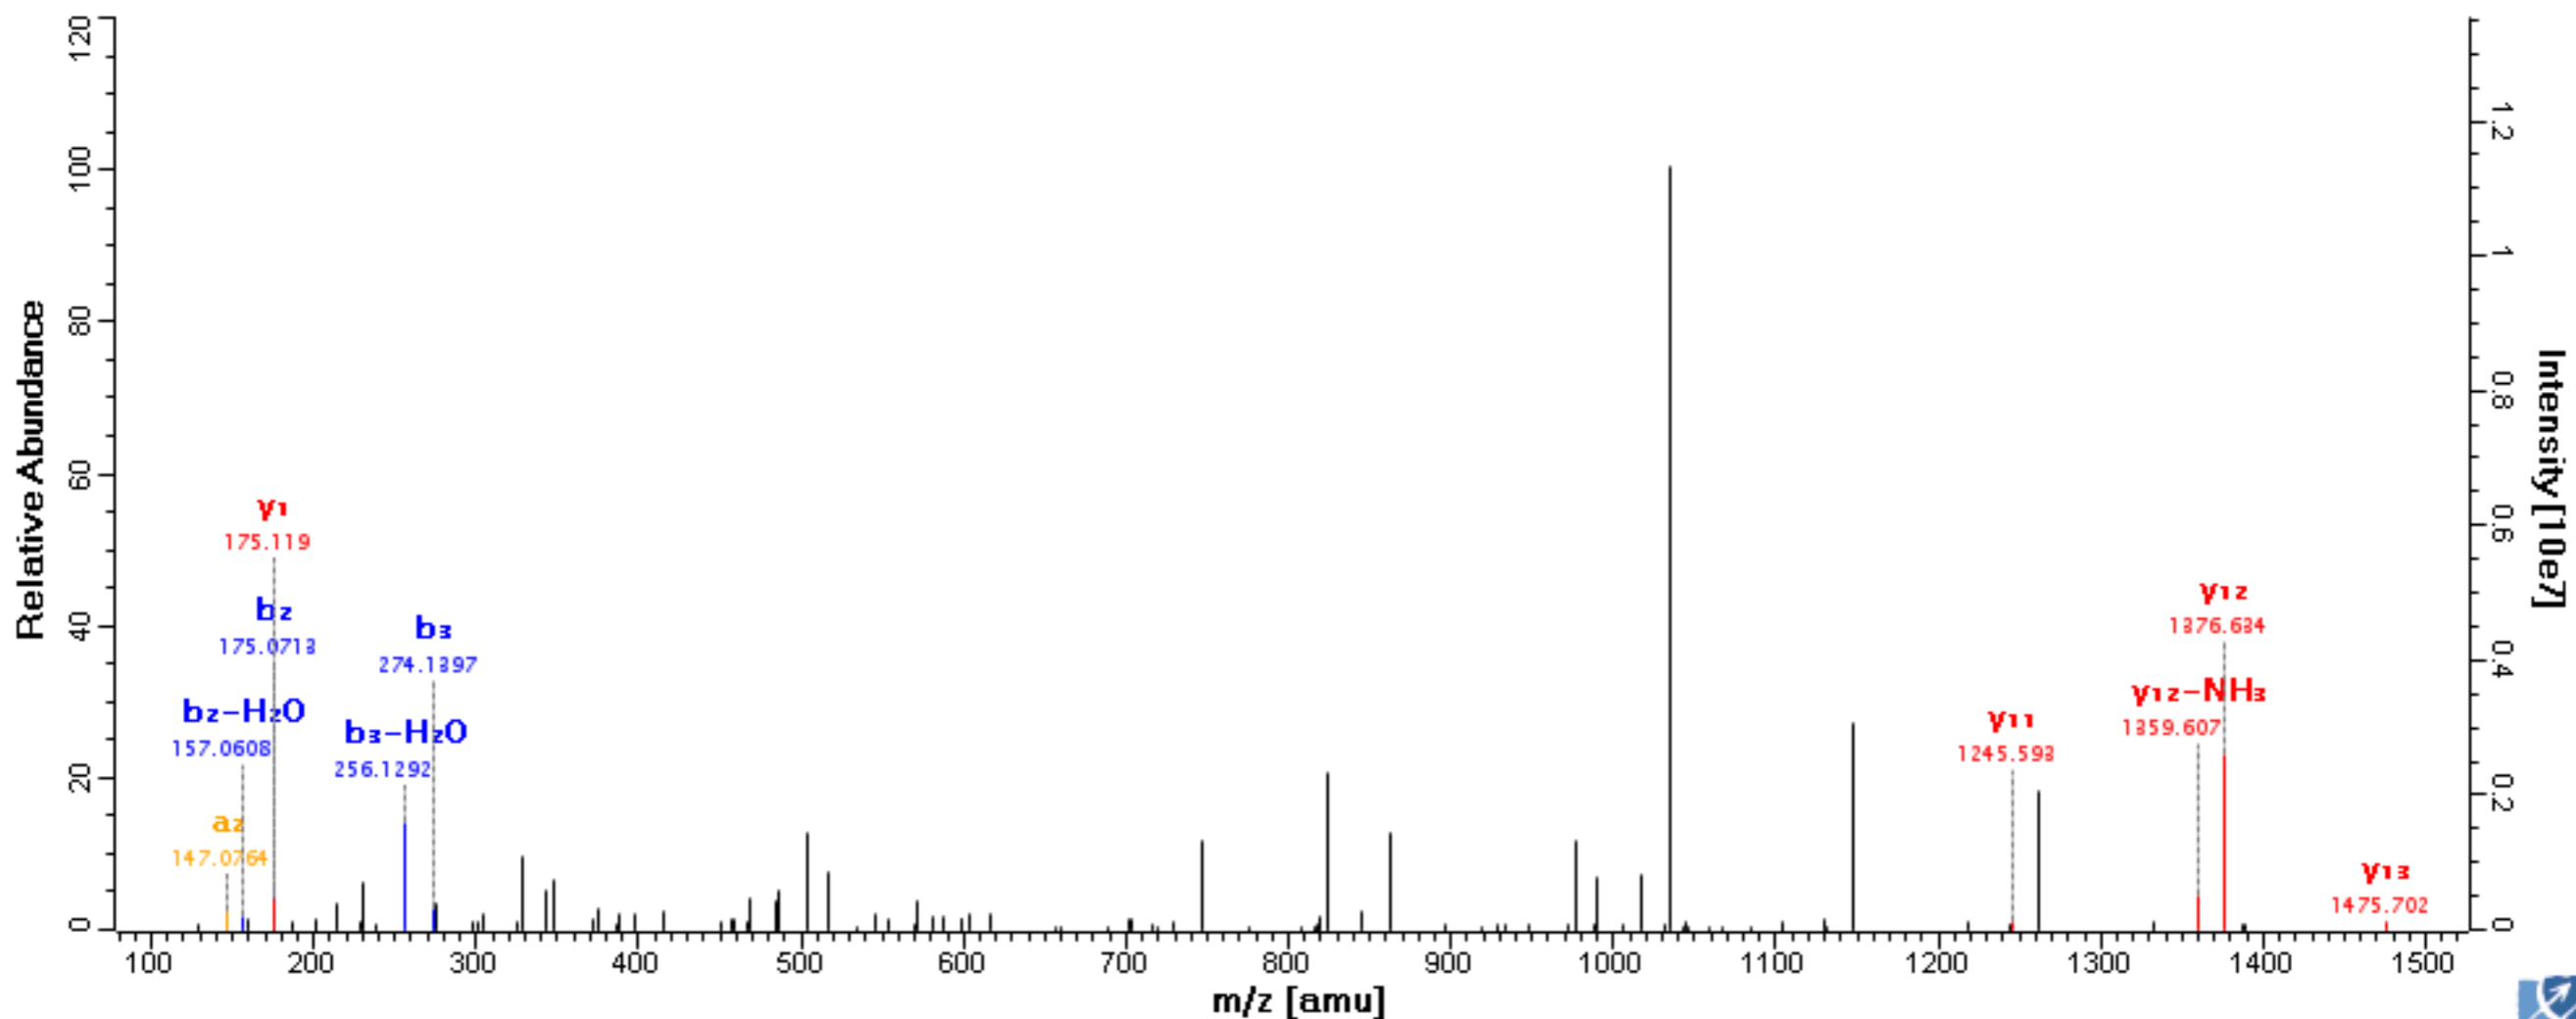

Source: Bibo\_20130531\_RM\_MSC07629\_4

Scannumber: 37914

Protein: KIAA0881; MAP3K17; PSK; PSK1; TAOK2; UNQ2971/PRO7431; TAOK2; KIAA0881; MAP3K17; PSK; PSK1; TAOK2; UNQ2971/PRO7431; TAOK2; Q9UL54-1; Q9UL54; Q86V37; B7ZM88; Q9UL54

Peptide Score: 102.51

Method: FTMS; HCD; 1

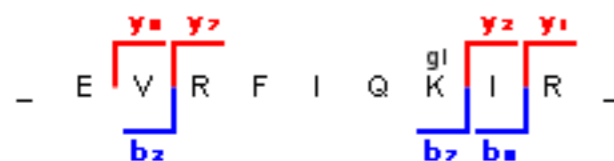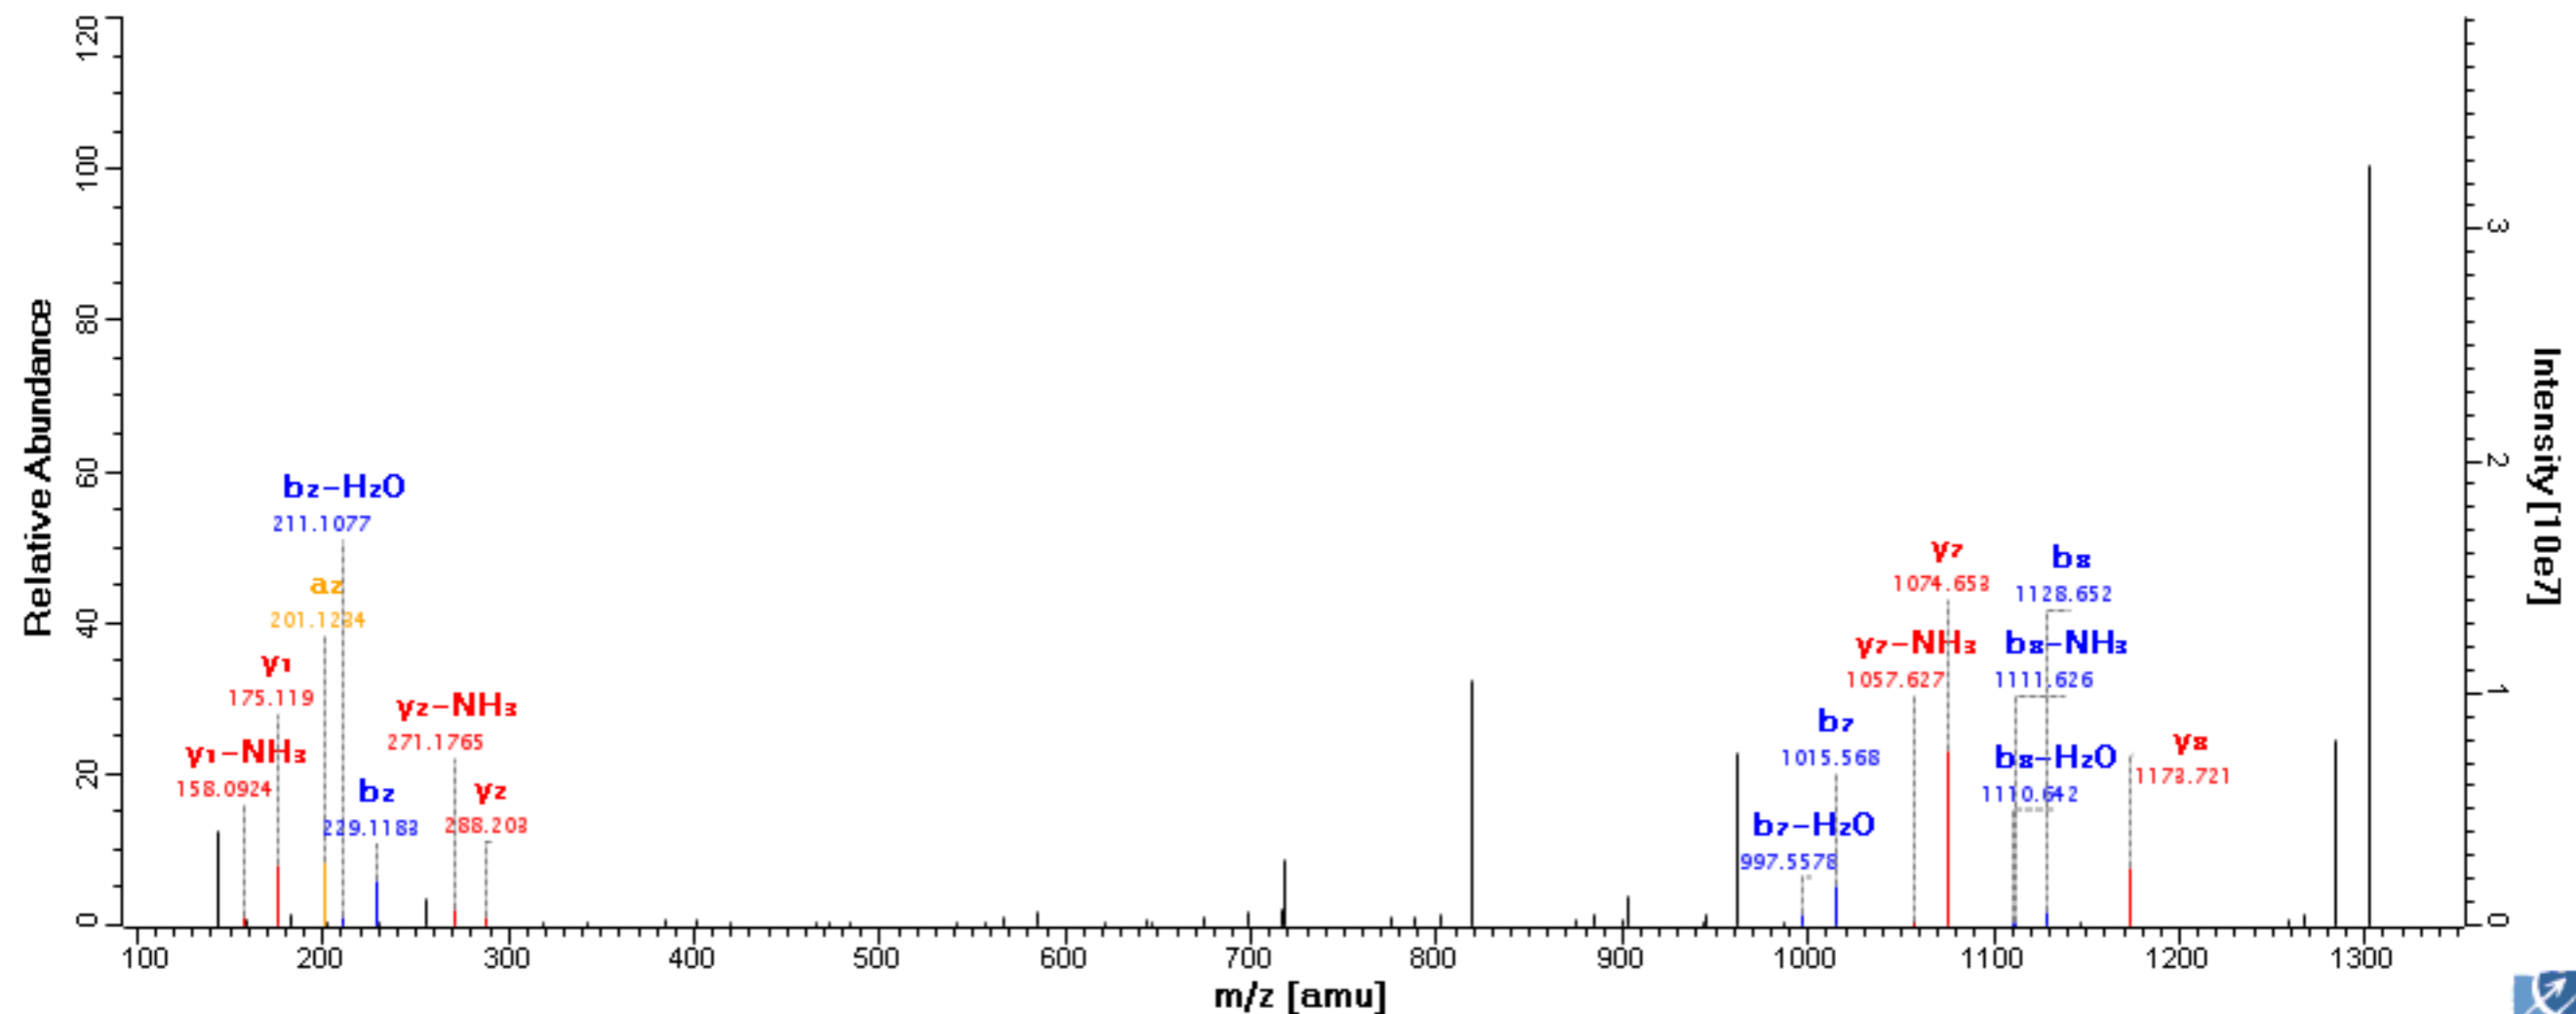

Source: Bibo\_20130531\_RM\_MSC07629\_4

Scannumber: 38178

Protein: KIAA0881; MAP3K17; PSK; PSK1; TAOK2; UNQ2971/PRO7431; TAOK2; KIAA0881; MAP3K17; PSK; PSK1; TAOK2; UNQ2971/PRO7431; TAOK2; Q9UL54-1; Q9UL54; Q86V37; B7ZM88; Q9UL54

Peptide Score: 126.52

Method: FTMS; HCD; 1

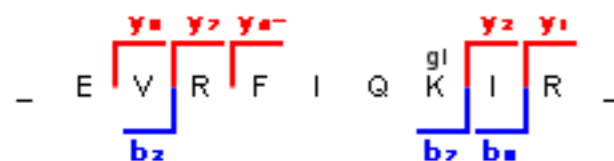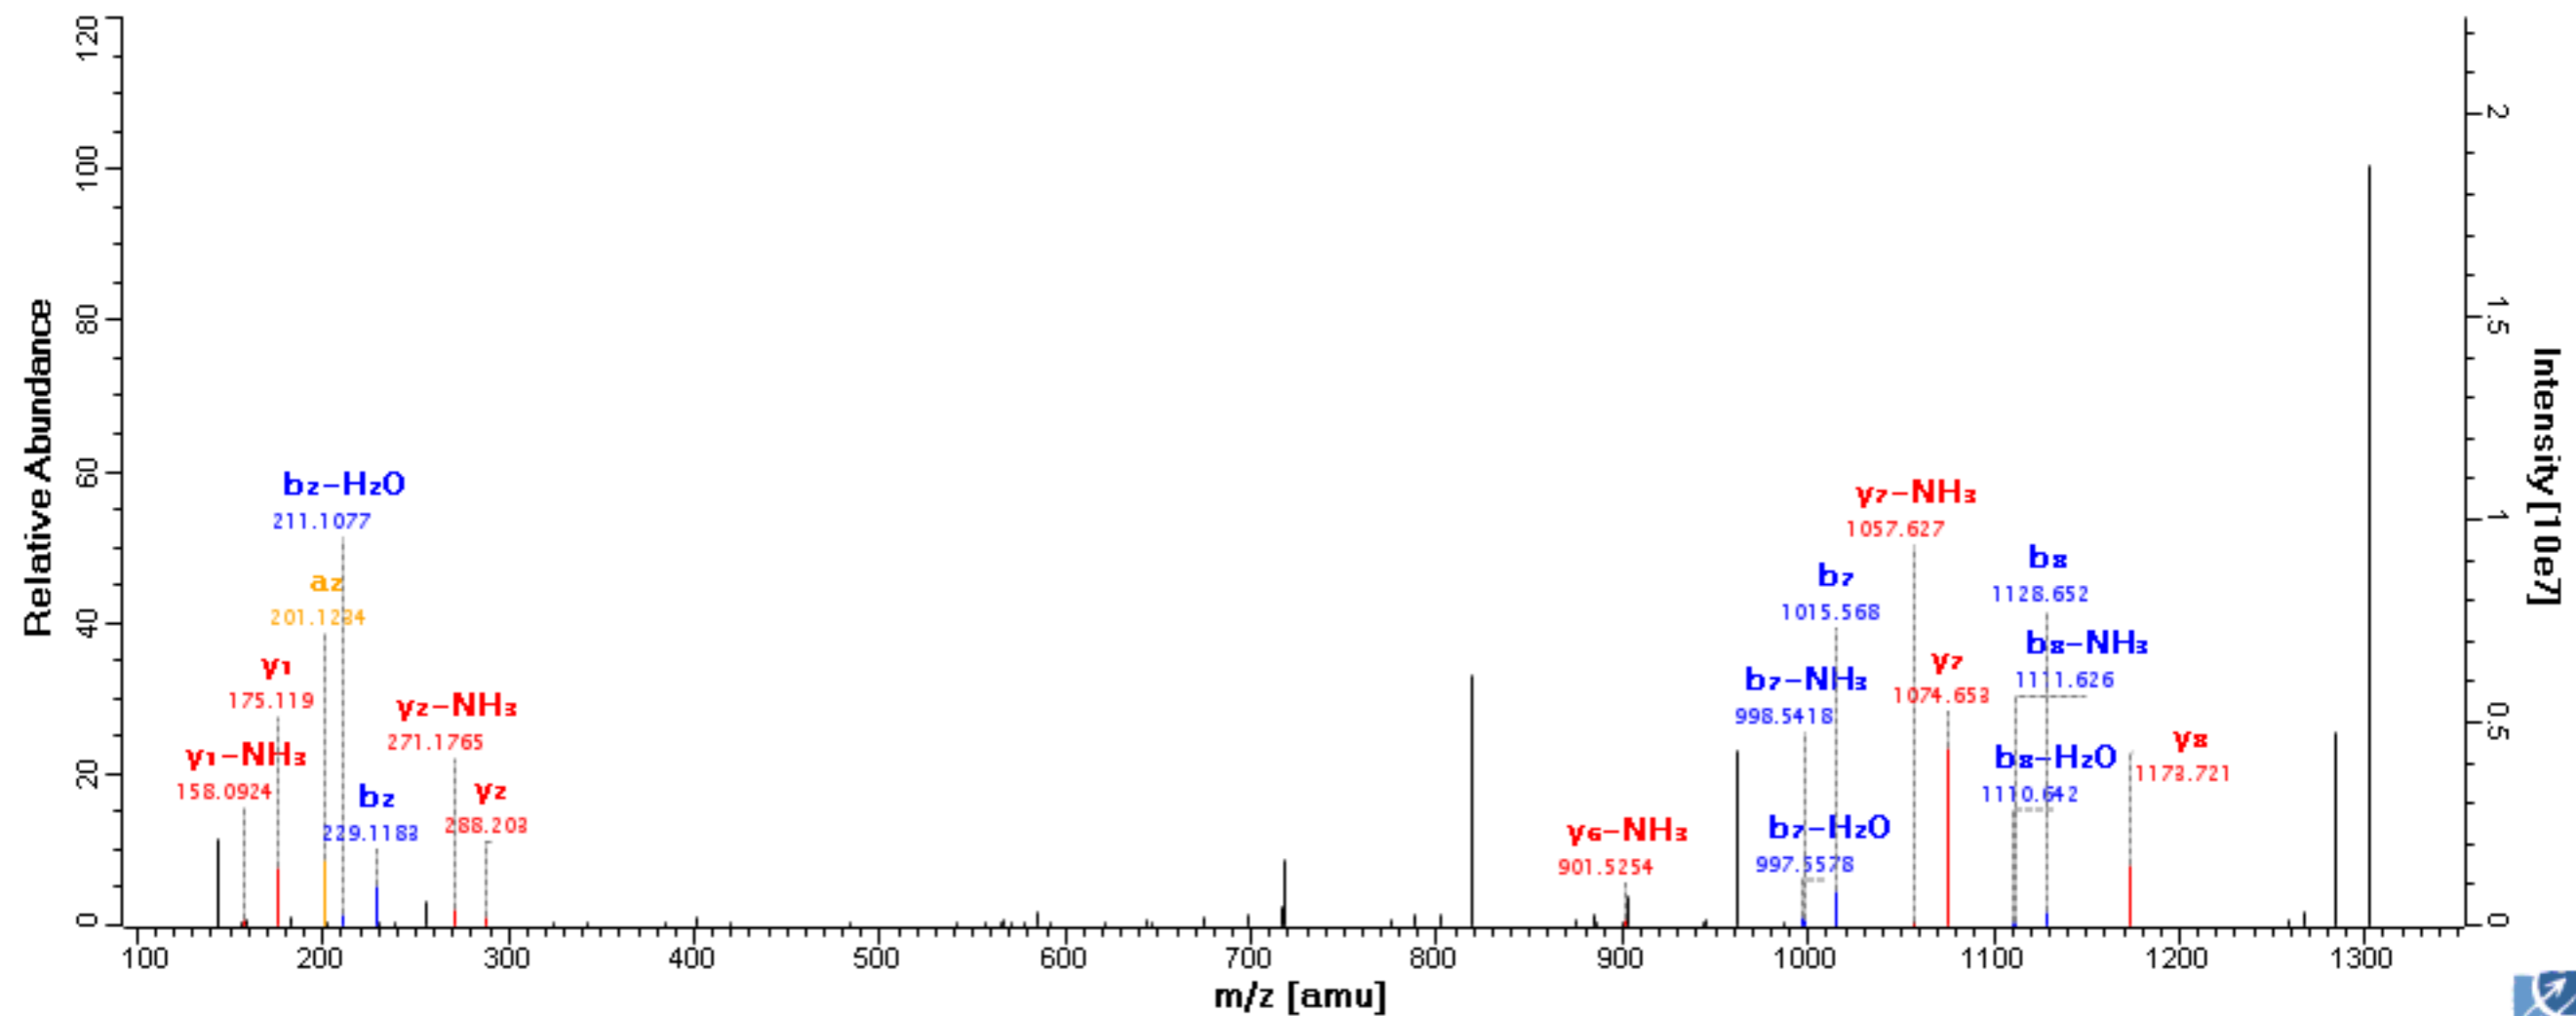

Supplement: supp_M113.033498_mcp.M113.033498-5.pdf [file supp_M113.033498_mcp.M113.033498-5.pdf]
